# Supplementary material for: Cell culture-based profiling across mammals reveals DNA repair and metabolism as determinants of species longevity
Source: eLife. 2016 Nov 22;5:e19130. doi: 10.7554/eLife.19130 (PMC5148604; doi:10.7554/eLife.19130)
Supplement: Figure 1—source data 1. — (A) Species and traits information. Life history traits of adult weight (AW, in grams), maximum lifespan (ML, in years), and female time to maturity (FTM, in days) of these species were obtained from Anage database (Tacutu et al., 2013). Since the life history data were not available for meadow vole, the data of a related species Microtus arvalis were used instead. Maximum lifespan residual (MLres) and female time to maturity residuals (FTMres) were computed based on the allometric equations MLres = ML/(4.88×AW0.153) and FTMres = FTM/(78.1×AW0.217), respectively. (B) RNA sequencing and read mapping to ortholog sets. Read mapping statistics are based on STAR. De novo assembly was performed by Trinity. (C) Read mapping to publically available genomes. For the species with publicly available genomes, the reads were also aligned to the full genomes for mapping rate comparison. The numbers of annotated genes were based on the published annotations. (D) Metabolite profiling. Metabolite profiling was performed on selected species only. DOI: http://dx.doi.org/10.7554/eLife.19130.003 [file elife-19130-fig1-data1.xlsx]

## Sheet: A. Species and Traits
Order	Family	Scientific Name	Common Name	AW	ML	FTM	MLres	FTMres
Eulipotyphla	Soricidae	Blarina brevicauda	Shrew	21.6	2.2	46	0.282	0.302
Chiroptera	Vespertilionidae	Eptesicus fuscus	Big brown bat	23	19	547	2.41	3.547
Chiroptera	Vespertilionidae	Myotis lucifugus	Little brown bat	10	34	210	4.898	1.631
Rodentia	Caviidae	Cavia porcellus	Guinea pig	639.1	12	66	0.915	0.208
Rodentia	Erethizontidae	Erethizon dorsatum	Porcupine	8600	23.4	1095	1.199	1.963
Rodentia	Chinchillidae	Chinchilla lanigera	Chinchilla	642.5	17.2	240	1.311	0.756
Rodentia	Sciuridae	Tamias striatus	Chipmunk	89.6	9.5	187	0.979	0.903
Rodentia	Sciuridae	Sciurus niger	Fox squirrel	800	16	353	1.179	1.06
Rodentia	Sciuridae	Sciurus vulgaris	Red squirrel	600	14.8	296	1.14	0.946
Rodentia	Castoridae	Castor canadensis	Beaver	20250	23.4	639	1.052	0.951
Rodentia	Muridae	Meriones unguiculatus	Gerbil	64.8	6.3	43	0.682	0.223
Rodentia	Muridae	Arvicanthis niloticus	African grass rat	110	6.7	45	0.669	0.208
Rodentia	Muridae	Microtus pennsylvanicus (1)	Meadow vole	27.5	4.8	38	0.592	0.237
Rodentia	Muridae	Sigmodon hispidus	Cotton rat	185	5.2	40	0.479	0.165
Rodentia	Muridae	Peromyscus leucopus	White footed mouse	22.3	7.9	73	1.007	0.477
Rodentia	Muridae	Peromyscus maniculatus brandii	Deer mouse	20.5	8.3	49	1.071	0.326
(1) longevity data based on related species Microtus arvalis

## Sheet: B. RNAseq & Mapping to ortholog
Sample ID			Common Name	Read Counts	Average read length	Aligned rate (mapping to orthologs)	Trinity total gene	Trinity total transcript	GC content	contig N50	contig median length	total assembled base
Shrew.1	RF03		Shrew	13936898	97	0.437427	31630	39218	54.78	1795	501	37959176
BigBrownBat.1	RF09		BigBrownBat	20591634	97	0.420929	36159	47115	53.09	1998	520	49579551
LittleBrownBat.1	RF16		LittleBrownBat	14475085	97	0.42676	31257	37611	53.2	1695	480	34942404
LittleBrownBat.2	RF17		LittleBrownBat	16713612	97	0.411331	34442	42913	53.43	1824	490	41678145
GuineaPig.1	RF06		GuineaPig	17244791	97	0.415708	31857	36904	51.94	1796	455	34577737
GuineaPig.2	RF07		GuineaPig	22611505	195	0.377967	103357	122296	50.28	2042	347	105245801
Porcupine.1	RF10		Porcupine	16797544	97	0.369755	42647	55630	52.34	1900	460	54018534
Porcupine.2	RF11		Porcupine	15861088	97	0.196524	26960	30918	52.88	1216	395	22531407
Chinchilla.1	RF08		Chinchilla	22077329	195	0.4527	88655	106639	52.69	2106	360	96175951
Chipmunk.1	RF28		Chipmunk	16203627	97	0.245794	30610	36870	51.91	1438	422	30098788
RedSquirrel.1A	RF24	Technical Replicates	RedSquirrel	37526540	195	0.421372	133842	179179	52.36	2973	406	208252079
RedSquirrel.1B	RF25		RedSquirrel	23118578	195	0.485353	92738	121209	52.94	2594	407	131580899
RedSquirrel.2	RF26		RedSquirrel	14929276	97	0.465692	32634	39019	52.12	1672	438	34489651
FoxSquirrel.1	RF22		FoxSquirrel	14759305	97	0.473614	34021	40275	52.76	1680	435	35755096
FoxSquirrel.2	RF23		FoxSquirrel	12470932	97	0.218847	24874	26936	52.16	1098	367	18355850
Beaver.1	RF04		Beaver	12907469	97	0.348736	32658	36934	49.94	1460	400	29525041
Beaver.2	RF05		Beaver	17404650	97	0.392039	37754	48927	51.51	1863	482	48039590
AfricanGrassRat.1	RF01		AfricanGrassRat	27700912	196	0.502781	109385	137839	49.97	2399	386	137382459
MeadowVole.1	RF12		MeadowVole	15904868	97	0.338406	32889	40112	51.14	1743	466	37183221
CottonRat.1	RF27		CottonRat	18164822	97	0.447263	32240	38977	49.91	1896	488	38564618
WhiteFootedMouse.1	RF18		WhiteFootedMouse	14953087	97	0.433229	33688	39794	50.93	1662	452	35442647
DeerMouse.1	RF02		DeerMouse	17338832	97	0.47826	31941	37867	51.88	1865	494	37490607
DeerMouse.2A	RF13	Technical Replicates	DeerMouse	16152677	97	0.379524	33979	42862	51.25	1859	522	42890402
DeerMouse.2B	RF14		DeerMouse	18526425	97	0.385306	33169	42276	52.24	1896	531	43157180
DeerMouse.3A	RF15		DeerMouse	18696359	97	0.429242	33380	41480	51.39	1831	519	41066282
DeerMouse.4	RF19		DeerMouse	21536475	195	0.501605	97949	123261	51.3	2337	379	120861979
DeerMouse.5	RF20		DeerMouse	18726959	97	0.415169	35073	45496	51.76	2025	537	48743240
DeerMouse.6	RF21		DeerMouse	15027631	97	0.404574	34434	43331	51.78	1747	492	41006730

## Sheet: C. Mapping to Genomes
Sample ID		Common Name	Read Counts	Aligned rate (mapping to genome)	Total No. of Annotated Genes	No. of Annotated Genes with >10 counts	Pearson correlation of log10 read counts ( mapping to orthologs vs. genome)
BigBrownBat.1		BigBrownBat	20591634	0.8487	15265	10967	0.968183
LittleBrownBat.1		LittleBrownBat	14475085	0.7737	14237	10141	0.932595
LittleBrownBat.2		LittleBrownBat	16713612	0.776	14237	10215	0.930748
GuineaPig.1		GuineaPig	17244791	0.8648	15334	10916	0.964771
GuineaPig.2		GuineaPig	22611505	0.8911	15334	11134	0.972336
Chinchilla.1		Chinchilla	22077329	0.9014	15521	11000	0.98326
DeerMouse.1		DeerMouse	17338832	0.8583	16133	11139	0.954159
DeerMouse.2A	Technical Replicates	DeerMouse	16152677	0.8175	16133	10850	0.94773
DeerMouse.2B		DeerMouse	18526425	0.8115	16133	10876	0.951775
DeerMouse.3A		DeerMouse	18696359	0.8477	16133	11341	0.949614
DeerMouse.4		DeerMouse	21536475	0.906	16133	11356	0.964682
DeerMouse.5		DeerMouse	18726959	0.8241	16133	10935	0.94871
DeerMouse.6		DeerMouse	15027631	0.8318	16133	11112	0.952295

## Sheet: D. Metabolite profiling
Sample ID		Common Name
GuineaPig.1		GuineaPig
GuineaPig.2		GuineaPig
Porcupine.1		Porcupine
Porcupine.2		Porcupine
Chinchilla.1		Chinchilla
Chinchilla.2		Chinchilla
Chipmunk.1		Chipmunk
RedSquirrel.1A	Technical Replicates	RedSquirrel
RedSquirrel.1B		RedSquirrel
RedSquirrel.2		RedSquirrel
FoxSquirrel.1		FoxSquirrel
FoxSquirrel.2		FoxSquirrel
Beaver.1		Beaver
Beaver.2		Beaver
AfricanGrassRat.1		AfricanGrassRat
AfricanGrassRat.2		AfricanGrassRat
Gerbil.1		Gerbil
MeadowVole.1		MeadowVole
MeadowVole.2		MeadowVole
CottonRat.1		CottonRat
CottonRat.2		CottonRat
WhiteFootedMouse.1		WhiteFootedMouse
