# Supplementary material for: Cell culture-based profiling across mammals reveals DNA repair and metabolism as determinants of species longevity
Source: eLife. 2016 Nov 22;5:e19130. doi: 10.7554/eLife.19130 (PMC5148604; doi:10.7554/eLife.19130)
Supplement: Supplementary file 1. — (A) Raw counts. (B) log10 normalized values. DOI: http://dx.doi.org/10.7554/eLife.19130.015 [file elife-19130-supp1.xlsx]

## Sheet: A. raw counts
Gene ID	Shrew.1	BigBrownBat.1	LittleBrownBat.1	LittleBrownBat.2	GuineaPig.1	GuineaPig.2	Porcupine.1	Porcupine.2	Chinchilla.1	Chipmunk.1	RedSquirrel.1A	RedSquirrel.1B	RedSquirrel.2	FoxSquirrel.1	FoxSquirrel.2	Beaver.1	Beaver.2	AfricanGrassRat.1	MeadowVole.1	CottonRat.1	WhiteFootedMouse.1	DeerMouse.1	DeerMouse.2A	DeerMouse.2B	DeerMouse.3A	DeerMouse.4	DeerMouse.5	DeerMouse.6
ENSMUSG00000104463	1192	1566	1094	1055	1742	1890	2045	506	1408	1096	2321	1547	1219	1650	572	1115	1920	2852	1336	1192	889	1372	2009	1722	1185	1539	2422	1580
ENSMUSG00000104445	2	0	0	0	2	4	26	2	0	2	0	2	0	2	0	4	4	2	6	0	2	0	1	2	2	0	0	0
ENSMUSG00000104305	32	30	47	84	16	18	44	8	6	27	412	403	180	349	89	42	54	70	28	58	15	26	22	23	22	46	40	22
ENSMUSG00000104250	777	509	707	789	630	794	364	203	556	666	3935	2938	1942	3611	864	555	721	1026	623	857	755	1155	1024	1001	1298	1618	1035	736
ENSMUSG00000104160	0	0	0	0	0	0	0	0	0	0	0	0	0	0	0	0	0	0	0	0	0	0	0	0	0	0	0	0
ENSMUSG00000104047	0	0	0	0	0	0	0	0	0	0	0	0	0	0	0	0	0	0	0	0	0	0	0	0	0	0	0	0
ENSMUSG00000104043	6	9646	13109	9447	892	2872	2451	1411	6886	6347	16607	11264	5713	7804	2126	320	1062	22889	5561	2	6577	8811	7469	8128	13835	14249	7687	7666
ENSMUSG00000103906	70	303	216	221	10	10	84	47	22	78	384	324	132	150	49	93	196	150	71	82	35	112	113	216	142	128	128	80
ENSMUSG00000103879	0	0	0	0	0	0	0	0	0	0	0	0	0	0	0	0	0	4	0	0	0	0	0	0	0	0	0	0
ENSMUSG00000103866	338	1112	98	251	156	98	224	134	216	140	605	314	196	198	114	104	103	258	212	78	221	1043	1204	532	190	1306	1748	381
ENSMUSG00000103711	0	0	2	0	16	113	16	0	30	6	10	2	0	0	2	0	18	0	24	0	18	4	16	23	12	4	17	2
ENSMUSG00000103565	502	1055	1125	1067	270	499	526	207	729	489	3414	2540	1332	1227	354	563	1243	1142	417	873	747	791	836	1149	831	1128	875	651
ENSMUSG00000103523	0	0	0	0	0	0	0	0	0	0	0	0	14	28	47	0	0	0	0	0	0	0	0	0	0	0	0	0
ENSMUSG00000103508	4179	10511	6790	8140	13325	14949	9717	4127	8428	3414	21073	15297	10253	8583	3980	5028	6805	8779	6088	12451	6889	9408	4415	4258	7239	8933	5785	4508
ENSMUSG00000103480	74	350	242	126	70	44	336	169	100	580	1428	901	552	845	292	121	240	3059	474	1669	255	661	2202	2420	943	2045	1768	1349
ENSMUSG00000103421	0	2	0	0	0	0	0	0	0	0	2	0	0	0	0	0	0	0	0	0	0	0	0	0	0	0	0	0
ENSMUSG00000103326	0	0	0	0	0	0	0	0	0	0	0	0	0	0	0	2	2	0	0	0	0	0	0	0	2	0	0	2
ENSMUSG00000103316	52	148	98	129	141	152	94	44	246	78	242	110	92	258	90	179	198	160	100	227	60	127	124	114	108	88	138	76
ENSMUSG00000103205	32	443	349	432	496	936	987	593	771	330	1854	1411	390	134	29	972	1206	2163	905	1632	662	881	1419	1632	1299	2431	1015	1455
ENSMUSG00000103104	179	752	900	578	515	670	516	254	378	143	788	416	308	417	194	415	449	596	464	565	634	461	685	726	647	758	772	397
ENSMUSG00000103084	0	0	0	0	0	0	0	0	0	0	0	0	0	4	16	0	0	0	0	0	0	0	0	0	0	0	0	2
ENSMUSG00000103019	3564	1190	1712	1824	549	601	796	389	855	2756	9943	6421	6051	3090	1198	623	980	3072	625	1705	818	1319	516	375	641	1487	1394	952
ENSMUSG00000102976	765	1430	919	1041	657	628	1800	443	840	599	2326	1178	902	728	336	792	1070	2249	1590	1416	2244	1409	2368	2307	1528	1982	1946	1240
ENSMUSG00000102843	0	0	0	10	0	0	3	0	0	0	0	0	0	0	0	0	0	0	4	0	206	20	4	6	10	0	0	22
ENSMUSG00000102823	8	5	0	2	0	4	2	24	0	2	0	0	0	0	0	121	161	0	2	0	8	18	2	2	4	6	2	0
ENSMUSG00000102752	0	206	35	25	50	50	16	0	0	8	116	80	110	16	16	160	312	22	14	14	20	16	16	8	10	4	20	10
ENSMUSG00000102720	192	1012	496	464	195	421	421	215	579	123	1015	844	397	232	56	252	491	573	250	586	117	489	352	396	549	1038	369	361
ENSMUSG00000102692	122	4	0	0	46	24	2	0	2	0	0	0	0	10	6	10	28	2	0	4	14	86	32	18	60	40	10	136
ENSMUSG00000102671	135	299	132	113	42	144	294	109	124	28	472	447	157	90	17	251	320	88	34	209	94	240	283	374	196	727	86	133
ENSMUSG00000102627	8	0	267	371	17	26	251	244	12	108	1585	1170	940	246	116	108	179	556	12	179	0	36	62	48	30	596	37	97
ENSMUSG00000102455	418	263	293	504	62	90	64	41	395	328	1507	1302	1281	587	287	183	525	1626	1879	840	856	774	921	1249	573	2166	1033	1272
ENSMUSG00000102418	0	0	0	0	2	0	0	0	0	0	0	0	0	0	0	0	0	0	0	0	0	0	0	0	0	0	0	0
ENSMUSG00000102412	0	0	0	0	0	0	0	0	0	0	0	0	0	0	0	0	0	0	0	0	0	0	0	0	0	0	0	0
ENSMUSG00000102367	0	0	0	0	0	0	0	0	0	0	0	0	2	0	0	0	0	0	0	0	0	0	0	0	0	0	0	0
ENSMUSG00000102308	0	0	0	0	0	0	0	0	0	0	0	0	0	0	0	0	0	0	0	0	0	0	0	0	0	0	0	0
ENSMUSG00000102252	1579	593	1751	3137	263	215	1805	1707	169	484	5172	3751	3192	685	352	430	864	2325	1569	1145	155	402	689	617	458	1665	494	684
ENSMUSG00000102226	34	14	16	16	30	58	392	140	182	42	21	2	0	20	4	0	6	68	26	76	10	72	18	16	63	42	2	6
ENSMUSG00000102091	0	0	0	0	0	0	0	0	0	0	0	0	0	0	0	0	0	0	0	0	0	0	0	0	0	0	0	0
ENSMUSG00000102049	129	254	12	210	46	102	152	32	42	104	154	54	220	142	36	163	257	80	226	46	305	453	216	32	22	184	336	29
ENSMUSG00000102018	0	14	0	0	0	0	4	0	0	4	2	0	2	0	0	0	4	0	0	0	8	0	0	0	0	2	2	2
ENSMUSG00000101976	0	2	0	0	0	0	0	0	0	0	0	0	0	0	0	0	0	0	0	0	0	0	0	0	0	0	0	0
ENSMUSG00000101959	0	6	0	2	0	0	8	4	6	2	26	6	8	0	0	0	0	4	6	2	0	16	18	24	32	22	10	51
ENSMUSG00000101904	334	5	12	22	54	32	38	4	16	69	278	110	71	101	42	76	68	96	73	39	113	90	96	77	43	40	109	50
ENSMUSG00000101894	0	0	0	0	0	0	0	0	0	0	0	0	0	0	0	0	0	0	0	0	0	0	0	0	0	0	0	0
ENSMUSG00000101892	126	466	240	264	252	412	144	50	116	42	610	344	236	123	39	40	90	1096	287	58	128	416	540	529	324	451	435	382
ENSMUSG00000101818	0	0	0	0	0	0	0	0	0	0	0	0	0	0	0	0	0	0	0	0	0	0	0	0	0	0	0	0
ENSMUSG00000101725	0	0	0	0	0	0	0	0	0	0	0	0	0	0	0	0	0	0	0	0	0	0	0	0	0	0	0	0
ENSMUSG00000101641	8	0	0	0	12	2	8	6	2	2	0	0	2	2	4	2	4	6	0	2	2	0	10	4	8	0	4	4
ENSMUSG00000101605	0	0	0	0	0	2	0	0	0	0	0	0	0	0	2	0	24	0	0	0	2	0	0	0	0	0	0	0
ENSMUSG00000101554	0	0	2	0	0	0	0	0	0	0	0	0	0	0	0	0	0	0	0	0	0	0	0	2	0	4	0	2
ENSMUSG00000101523	630	1481	770	939	793	650	397	134	426	333	1544	786	703	582	334	345	386	1482	432	571	543	573	784	650	688	728	889	485
ENSMUSG00000101389	0	0	0	0	0	0	0	0	0	0	0	0	0	0	0	0	0	0	0	2	0	0	0	0	0	0	0	0
ENSMUSG00000101315	0	0	0	0	0	0	0	0	0	0	0	0	0	0	0	0	0	0	0	0	0	0	0	0	0	0	2	0
ENSMUSG00000101113	0	0	0	0	0	0	0	0	0	0	0	0	0	0	0	2	0	0	0	0	0	0	0	0	0	0	0	0
ENSMUSG00000101031	0	0	0	0	0	0	0	0	0	0	0	0	0	0	0	0	0	0	0	0	0	0	0	0	0	0	0	0
ENSMUSG00000101026	0	0	0	0	0	0	0	0	0	0	0	0	0	0	0	0	0	0	0	0	0	0	0	0	2	2	0	0
ENSMUSG00000100967	0	0	0	0	0	0	0	0	0	0	0	0	0	0	0	0	0	0	0	0	0	0	0	0	0	0	0	0
ENSMUSG00000100937	0	0	0	0	0	0	0	0	0	0	0	0	0	0	0	0	0	62	20	10	0	16	11	26	32	10	10	66
ENSMUSG00000100916	0	0	2	0	0	2	0	2	4	0	0	2	0	0	0	0	0	20	18	0	24	2	4	6	2	2	6	18
ENSMUSG00000100855	0	0	0	0	0	0	8	6	0	0	2	0	0	0	0	0	0	0	0	0	0	0	0	0	2	0	2	0
ENSMUSG00000100748	0	0	0	0	0	0	0	0	0	0	0	0	0	0	0	0	0	0	0	0	0	0	0	0	0	0	0	0
ENSMUSG00000100704	0	0	0	0	0	0	0	0	0	0	0	0	0	0	0	0	0	0	0	0	0	0	0	0	0	0	0	0
ENSMUSG00000100642	2	10	12	32	6	16	12	14	11	0	4	2	2	0	0	0	2	10	34	12	12	10	34	34	12	22	66	5
ENSMUSG00000100512	0	0	0	0	0	0	2	0	0	2	0	0	0	0	0	0	0	0	0	0	2	2	2	0	0	2	0	4
ENSMUSG00000100254	2	2	0	0	6	8	0	6	0	14	16	12	10	0	0	12	2	24	79	2	10	6	10	19	18	30	38	8
ENSMUSG00000100241	2	0	0	0	0	0	0	0	0	0	0	0	0	0	0	0	0	0	0	0	0	0	0	0	0	0	0	0
ENSMUSG00000100208	0	0	0	0	0	0	0	0	0	0	0	0	0	0	0	0	0	0	0	0	0	0	0	0	0	0	0	0
ENSMUSG00000100194	0	0	0	0	0	0	0	0	0	0	0	0	0	0	0	0	0	0	0	0	0	0	0	0	0	0	0	0
ENSMUSG00000100010	0	0	8	2	0	0	0	0	2	0	2	0	0	0	0	0	0	2	0	0	0	0	0	0	0	0	0	0
ENSMUSG00000099763	0	0	0	0	0	0	0	0	0	0	0	0	0	0	0	2	2	0	0	0	0	0	0	0	0	0	0	0
ENSMUSG00000099687	0	0	0	0	0	0	0	2	0	0	0	0	0	0	0	0	0	0	0	0	0	0	0	0	0	0	0	0
ENSMUSG00000099481	40	188	118	153	18	16	40	12	10	44	70	62	40	56	24	26	69	51	74	102	60	117	127	136	284	219	125	102
ENSMUSG00000099398	0	0	0	0	0	0	0	0	0	0	0	0	0	0	0	0	0	2	0	0	0	0	0	0	2	0	0	0
ENSMUSG00000099353	0	0	0	0	0	0	0	0	0	0	0	0	0	0	0	0	0	0	0	0	0	0	0	0	0	0	0	0
ENSMUSG00000099216	0	0	0	0	0	0	0	0	0	0	0	0	0	0	0	0	0	0	0	0	0	0	0	0	0	0	0	0
ENSMUSG00000099164	973	1339	2474	2096	687	1059	533	360	1537	518	2222	1162	1086	1407	369	637	1018	1601	924	1703	610	1092	927	938	2761	1597	809	814
ENSMUSG00000099102	28	2	106	64	40	0	4	2	0	0	0	0	26	64	16	138	176	2	386	332	500	448	388	344	474	6	308	404
ENSMUSG00000099083	387	448	159	270	265	171	268	66	176	96	487	340	199	211	75	192	167	324	102	309	126	365	272	212	174	284	271	175
ENSMUSG00000099041	8918	3018	2017	1840	1907	1585	1304	761	4999	523	3678	2861	1844	1608	559	1191	1256	1934	492	1185	2607	2438	1869	2283	1423	2355	2296	1082
ENSMUSG00000099032	0	2	0	2	0	0	0	0	0	0	0	0	0	0	0	0	0	0	0	0	0	0	0	0	0	0	0	0
ENSMUSG00000098930	611	835	1104	1115	472	673	505	274	1618	310	3392	2349	1211	663	177	539	976	1701	747	861	1316	1456	1144	1620	2068	3276	1693	1372
ENSMUSG00000098923	621	586	332	334	212	186	119	65	624	135	938	464	277	141	46	177	286	666	181	577	212	286	303	299	424	379	254	316
ENSMUSG00000098892	1938	1226	620	652	1217	1100	1547	831	1582	930	5327	3430	1844	1855	610	984	1359	1463	1538	681	1417	1591	2589	3091	1054	1960	3034	2454
ENSMUSG00000098789	56	286	206	171	67	84	164	74	96	90	448	328	112	230	92	40	72	218	74	51	80	153	73	97	138	78	130	58
ENSMUSG00000098754	0	0	0	2	0	0	2	2	0	0	0	0	0	0	0	0	0	4	0	0	2	0	2	0	0	0	0	0
ENSMUSG00000098681	0	0	2	0	0	0	0	0	0	0	0	0	0	0	0	2	4	0	0	0	0	0	0	0	0	2	0	0
ENSMUSG00000098678	0	12	181	119	12	28	218	85	12	2	380	248	40	0	0	0	2	96	0	0	2	10	2	2	2	12	6	4
ENSMUSG00000098643	696	886	585	703	395	295	180	100	327	331	970	552	455	581	180	332	451	728	374	612	496	762	919	837	869	863	1085	582
ENSMUSG00000098633	0	0	0	0	8	2	0	0	2	0	54	32	28	6	2	2	4	0	0	0	0	0	0	0	0	0	0	0
ENSMUSG00000098615	71	465	228	290	224	404	95	141	707	232	1318	888	472	249	78	828	980	942	164	251	348	518	498	843	175	922	555	778
ENSMUSG00000098571	699	1148	451	442	821	993	92	6	607	325	2493	2398	803	998	238	658	1360	824	226	733	354	819	503	612	595	995	791	365
ENSMUSG00000098557	33	758	110	83	63	62	0	12	416	6	176	96	6	20	16	4	6	44	46	34	36	652	144	112	200	74	75	135
ENSMUSG00000098546	1009	1038	500	433	391	130	138	40	278	149	1030	466	308	573	199	784	707	693	381	498	460	584	753	520	394	540	1039	226
ENSMUSG00000098509	0	0	0	0	0	46	0	0	0	0	0	0	0	0	0	0	0	0	0	0	0	0	0	0	0	0	0	0
ENSMUSG00000098488	58	439	371	498	64	78	160	38	50	284	772	436	174	180	70	10	24	26	136	12	216	80	92	159	75	75	154	76
ENSMUSG00000098411	0	0	0	2	0	2	2	2	0	4	6	2	2	30	14	2	0	49	8	12	0	2	0	0	14	2	0	4
ENSMUSG00000098387	20	14	20	32	95	112	88	23	152	11	44	24	12	8	6	14	18	60	36	54	59	52	44	45	41	55	56	40
ENSMUSG00000098377	201	527	198	295	332	394	367	260	568	423	616	359	244	243	115	228	229	224	277	198	214	234	386	400	117	200	377	259
ENSMUSG00000098375	611	245	318	255	468	682	443	242	476	194	458	308	181	183	57	454	479	770	250	576	417	656	627	744	797	1081	541	691
ENSMUSG00000098301	274	457	790	943	532	494	214	97	472	215	1196	526	357	412	142	395	516	1196	480	497	503	708	541	452	937	1140	572	360
ENSMUSG00000098274	10861	16150	12710	14023	6901	13466	9325	4381	24159	9190	21405	15462	6939	7731	3160	6425	16891	25508	11668	17352	12089	13881	12040	13817	20805	19315	13270	11717
ENSMUSG00000098207	0	4	0	4	0	0	0	0	0	0	84	52	4	4	0	0	0	0	0	0	0	0	0	0	0	0	0	0
ENSMUSG00000098188	1161	559	48	41	38	60	2	2	32	36	224	98	48	46	8	161	197	54	151	20	24	22	41	38	36	30	80	30
ENSMUSG00000098176	0	8	14	6	0	2	0	0	12	0	0	0	0	0	0	0	0	6	2	0	0	0	0	4	0	0	0	0
ENSMUSG00000098164	0	0	0	4	0	2	2	0	2	0	0	0	0	0	0	0	0	126	0	10	12	8	16	12	26	28	25	22
ENSMUSG00000098132	0	0	2	4	0	2	0	2	2	0	0	4	0	0	0	2	2	0	4	0	2	0	2	0	0	0	0	0
ENSMUSG00000098112	0	0	0	2	0	0	2	0	4	0	0	0	0	0	0	0	0	0	0	0	326	0	0	0	2	4	0	0
ENSMUSG00000097918	0	0	2	4	0	0	0	0	0	0	0	0	0	0	0	0	0	0	0	0	0	0	0	0	2	0	0	0
ENSMUSG00000097916	0	0	0	0	0	0	0	0	0	0	0	0	0	0	0	0	0	0	0	0	0	0	0	0	0	0	0	0
ENSMUSG00000097909	412	351	661	528	149	146	150	68	512	109	895	689	390	626	107	130	162	530	149	431	161	419	426	639	603	425	561	167
ENSMUSG00000097905	0	0	0	0	0	0	0	2	0	0	2	10	2	0	0	0	0	2	0	0	0	0	0	2	0	0	0	0
ENSMUSG00000097894	0	30	0	2	0	0	0	0	0	0	2	0	0	0	0	0	0	0	0	0	0	0	0	0	2	0	0	0
ENSMUSG00000097886	0	0	0	0	0	0	0	0	0	0	0	0	0	0	0	0	0	0	0	0	0	0	0	0	0	0	0	0
ENSMUSG00000097880	0	0	0	0	0	0	0	0	0	0	0	0	0	0	0	4	8	0	0	0	0	0	0	0	0	0	0	0
ENSMUSG00000097829	3523	2996	1257	2727	7894	10518	3329	3029	10739	1332	7293	5233	3343	2849	1254	2568	2747	3867	977	4711	3796	4195	2311	2545	3076	3969	2219	923
ENSMUSG00000097771	534	14648	6524	6748	2734	4359	2529	1295	3486	3613	11458	9614	5007	6867	1965	2727	5729	12512	4608	6769	5044	8085	6584	10358	5322	6933	7938	5854
ENSMUSG00000097721	623	1122	959	1120	2469	3520	867	502	2042	1006	2064	1723	1060	1169	351	544	968	1419	536	264	400	725	616	779	697	1011	664	463
ENSMUSG00000097708	16	2	4	4	30	42	0	0	8	0	4	6	6	38	4	2	0	16	12	4	58	26	8	12	24	18	14	14
ENSMUSG00000097629	15	10	22	8	303	455	526	167	589	85	218	144	121	226	93	68	151	1020	285	335	210	312	314	453	473	627	386	400
ENSMUSG00000097508	125	280	63	95	137	338	139	93	218	166	1347	938	406	258	99	36	124	458	152	206	87	140	130	187	127	326	139	98
ENSMUSG00000097487	16	16	46	83	198	356	538	436	488	0	10	8	6	6	2	139	50	202	58	112	118	72	89	110	57	134	84	40
ENSMUSG00000097485	161	365	257	250	1332	4906	258	162	758	177	825	684	607	393	130	648	1016	830	297	575	389	413	486	630	430	715	329	336
ENSMUSG00000097449	0	6	3	0	180	265	152	129	62	0	26	14	6	0	0	0	2	4	38	48	0	20	40	40	30	26	30	46
ENSMUSG00000097437	0	2	2	6	0	0	0	0	0	0	0	2	0	0	0	0	0	4	0	0	0	0	0	0	0	0	0	0
ENSMUSG00000097407	0	0	0	0	0	0	0	0	0	0	0	0	0	0	0	0	0	0	0	0	0	0	0	0	0	0	0	0
ENSMUSG00000097394	240	658	253	283	307	686	364	253	1130	372	1485	1216	635	510	134	169	297	2537	406	204	266	554	463	719	405	986	615	378
ENSMUSG00000097351	0	334	4	0	0	0	0	0	0	0	0	0	0	0	0	4	6	0	0	0	0	0	0	0	0	0	0	0
ENSMUSG00000097328	543	477	496	537	652	1099	681	229	254	273	2945	2210	462	326	109	169	479	975	420	476	366	392	300	519	308	356	526	329
ENSMUSG00000097319	1596	1012	818	1064	1015	1447	951	596	1540	1128	4099	2900	1793	1688	364	449	1141	2710	1704	1168	2092	2501	2662	4108	2146	2833	3980	2047
ENSMUSG00000097306	0	0	0	0	0	0	0	0	0	0	0	0	0	0	0	0	0	0	0	0	0	0	0	0	0	0	0	0
ENSMUSG00000097297	4	0	0	0	0	0	151	50	0	0	0	0	0	0	0	0	0	2	2	0	0	0	0	0	0	2	0	8
ENSMUSG00000097187	0	0	0	0	0	0	0	0	0	0	10	6	0	0	0	0	0	3	0	0	2	0	0	0	0	0	0	0
ENSMUSG00000097185	0	0	0	0	0	0	0	0	0	0	0	0	0	0	0	14	10	90	64	266	0	0	2	2	2	0	2	2
ENSMUSG00000097132	0	2	15	10	16	36	0	0	8	2	54	36	34	4	2	14	22	18	2	85	0	0	8	18	2	2	16	10
ENSMUSG00000097126	106	0	6	4	0	2	0	0	2	2	0	0	0	0	2	0	0	15	0	0	2	2	0	4	0	0	0	4
ENSMUSG00000097112	2	0	2	2	0	0	0	0	0	0	0	0	0	0	0	0	0	0	0	0	0	2	0	2	0	0	2	0
ENSMUSG00000097078	0	0	0	0	0	0	0	0	0	2	0	0	0	0	0	0	0	56	22	16	8	64	30	52	56	102	142	56
ENSMUSG00000097064	2	34	13	4	110	202	260	130	98	16	160	112	10	2	2	2	4	564	132	18	362	177	182	222	116	66	402	41
ENSMUSG00000096998	0	59	43	4	2	0	8	8	12	0	20	16	58	4	4	0	0	34	3	22	0	4	2	0	0	12	0	44
ENSMUSG00000096951	128	191	10	0	0	0	0	0	0	363	1488	1423	191	1208	381	50	50	5087	2322	3488	1144	1083	421	440	1197	2820	816	1033
ENSMUSG00000096887	12	116	62	48	0	0	0	0	0	6	0	0	0	2	10	0	0	0	4	36	48	28	61	87	46	112	50	23
ENSMUSG00000096883	0	0	8	18	4	6	0	0	0	4	92	98	24	8	0	56	277	2	0	4	2	6	2	2	10	0	0	2
ENSMUSG00000096872	0	0	0	0	0	0	0	0	0	0	0	0	0	0	0	0	0	0	0	0	0	0	0	0	0	0	0	0
ENSMUSG00000096850	0	0	0	0	0	0	0	0	0	0	0	0	0	0	0	0	0	0	0	0	0	0	0	0	0	0	0	0
ENSMUSG00000096847	6	0	2	0	10	12	10	0	10	0	4	8	0	14	16	8	8	0	9	3	34	48	99	142	6	22	158	12
ENSMUSG00000096796	0	0	0	0	0	0	0	0	0	0	0	0	0	0	0	0	0	0	0	0	0	0	0	0	0	0	0	0
ENSMUSG00000096753	0	0	0	0	0	0	0	0	0	0	0	0	0	0	0	0	0	0	0	0	0	0	0	0	0	0	0	0
ENSMUSG00000096747	0	0	0	0	0	0	0	0	0	0	0	0	0	0	0	0	0	0	0	0	0	0	0	0	0	0	0	0
ENSMUSG00000096740	156	332	127	109	84	185	211	103	398	226	974	581	355	594	192	181	431	445	112	179	132	269	119	142	341	583	142	160
ENSMUSG00000096727	0	602	346	263	150	346	699	141	4	6	8	8	4	2	2	14	24	569	217	50	122	236	30	50	283	2	36	94
ENSMUSG00000096697	0	0	0	0	0	0	0	0	0	0	0	0	0	0	0	0	0	0	0	0	0	0	0	0	0	0	0	0
ENSMUSG00000096611	0	0	0	0	0	0	0	0	0	0	0	0	0	0	0	0	0	0	0	0	0	0	0	0	0	0	0	0
ENSMUSG00000096607	0	0	0	0	0	0	0	0	0	0	0	0	0	0	0	0	0	0	0	0	0	0	0	0	0	0	0	0
ENSMUSG00000096606	0	2	0	0	6	6	0	0	2	6	8	4	12	4	2	0	0	2	2	10	0	0	2	2	0	2	4	33
ENSMUSG00000096584	0	2	0	0	0	0	0	0	0	0	0	0	0	0	0	0	0	0	0	0	0	0	0	2	0	0	0	0
ENSMUSG00000096573	0	0	0	0	0	0	0	0	0	0	0	0	0	0	0	0	0	0	0	0	0	0	0	0	0	0	0	0
ENSMUSG00000096549	0	2	28	10	24	16	22	14	18	28	48	18	8	4	0	4	0	76	42	40	47	56	52	96	89	89	91	56
ENSMUSG00000096546	0	0	0	0	0	0	0	0	0	0	0	0	0	0	0	0	0	0	0	0	0	0	0	0	0	0	0	0
ENSMUSG00000096537	0	0	0	0	0	0	0	0	0	0	0	0	0	0	2	0	0	0	0	0	0	0	0	0	0	0	0	0
ENSMUSG00000096528	0	0	0	0	0	0	0	0	0	0	0	0	0	0	0	0	0	0	0	0	0	0	0	0	0	0	0	0
ENSMUSG00000096525	0	0	0	0	0	0	0	0	0	0	0	0	0	0	0	0	0	0	0	0	0	0	0	0	0	0	0	0
ENSMUSG00000096516	0	0	0	0	0	0	0	0	0	0	0	0	0	0	0	0	0	0	0	0	0	0	0	0	0	0	0	0
ENSMUSG00000096472	6	333	210	210	44	42	173	110	232	130	710	561	421	388	51	24	72	146	153	140	227	326	151	191	424	236	133	90
ENSMUSG00000096458	0	417	96	109	10	12	2	0	18	12	118	54	62	222	56	12	22	988	392	521	928	425	1118	994	575	634	959	545
ENSMUSG00000096405	0	0	0	0	0	0	0	0	0	0	0	0	0	0	0	0	0	0	0	0	0	0	0	0	0	0	0	0
ENSMUSG00000096393	0	0	0	0	0	0	0	0	0	0	0	0	0	0	0	0	0	0	0	0	0	0	0	0	0	0	0	0
ENSMUSG00000096361	515	633	682	1304	527	825	335	269	1259	377	3323	1854	968	958	304	402	636	1526	960	777	730	849	1384	1460	1143	2894	1694	1305
ENSMUSG00000096351	76	176	469	660	70	206	277	952	282	38	747	716	552	498	113	6	10	30	228	237	404	338	173	184	169	201	214	134
ENSMUSG00000096330	0	0	0	0	0	0	0	0	0	0	0	0	0	0	0	0	0	0	0	0	0	0	0	0	0	0	0	0
ENSMUSG00000096257	0	40	2	8	4	4	0	0	4	2	30	26	10	73	20	34	108	0	2	0	4	0	4	4	12	14	4	2
ENSMUSG00000096254	0	0	0	0	0	0	0	0	0	0	0	0	0	0	0	0	0	0	0	0	0	0	0	2	0	0	2	0
ENSMUSG00000096225	0	92	81	30	0	0	10	8	0	0	10	4	8	0	0	0	0	2	0	0	0	0	0	0	0	0	0	0
ENSMUSG00000096221	0	0	0	0	0	0	0	0	2	0	0	0	0	0	0	0	0	0	0	0	0	0	0	0	0	0	0	0
ENSMUSG00000096215	0	0	0	0	0	0	0	0	0	0	0	0	0	0	0	0	0	0	0	0	0	0	0	0	0	4	0	0
ENSMUSG00000096210	2111	6158	5880	6975	2450	2855	1425	635	3196	1161	4071	3065	1675	733	145	894	1434	5042	941	1816	2909	2983	8794	10312	4039	3411	7912	2577
ENSMUSG00000096199	197	78	115	80	190	300	36	38	454	68	232	152	78	110	40	90	178	306	189	142	97	127	120	196	163	252	148	107
ENSMUSG00000096188	219	79	27	51	66	20	4	17	26	26	146	110	118	118	38	62	48	148	42	43	163	91	103	80	22	62	206	30
ENSMUSG00000096146	0	0	0	2	0	0	2	0	14	0	0	0	0	0	0	0	0	0	0	0	0	0	0	0	0	0	0	0
ENSMUSG00000096145	1769	1142	1238	993	283	518	1520	906	3404	859	6777	4240	1587	1336	342	617	1959	1626	535	2014	791	1317	1226	1739	1974	4750	2148	1208
ENSMUSG00000096140	0	0	0	4	0	0	0	0	0	0	0	0	0	0	0	0	0	0	0	0	0	0	0	0	0	0	0	0
ENSMUSG00000096094	0	0	0	0	0	0	0	0	0	0	0	0	0	0	0	0	0	0	0	0	0	0	0	0	0	0	0	0
ENSMUSG00000096083	0	0	0	0	0	0	0	0	0	0	8	6	0	4	1	0	0	0	2	0	0	0	0	0	0	0	0	0
ENSMUSG00000096072	0	0	0	0	0	0	0	0	0	0	0	0	0	0	0	0	0	0	0	0	0	0	0	0	0	0	0	0
ENSMUSG00000096054	0	0	12	0	2	4	12	6	0	0	4	0	0	0	0	0	0	0	0	2	0	0	0	0	0	0	2	12
ENSMUSG00000096035	0	0	0	0	0	0	0	0	0	0	0	0	0	0	0	0	0	0	2	0	2	0	0	0	6	0	0	0
ENSMUSG00000096029	0	0	0	0	6	2	0	0	0	0	0	0	0	0	0	0	0	0	0	0	0	0	0	0	0	0	0	0
ENSMUSG00000096001	0	0	0	0	0	0	0	0	0	0	0	2	0	0	0	0	0	0	0	0	0	0	0	0	0	0	0	2
ENSMUSG00000095992	0	0	0	0	0	0	0	0	0	0	0	0	0	0	0	0	0	0	0	0	0	0	0	0	0	8	0	0
ENSMUSG00000095959	0	0	0	0	0	0	0	0	0	0	0	0	0	0	0	0	0	0	0	0	0	0	0	0	0	0	0	0
ENSMUSG00000095957	0	0	0	0	0	0	0	0	0	0	0	0	0	0	0	0	0	0	0	0	0	0	0	0	0	0	0	0
ENSMUSG00000095953	0	0	0	0	0	0	0	0	0	0	0	0	0	0	0	0	0	0	0	0	0	0	0	2	0	0	0	0
ENSMUSG00000095930	141	0	0	2	85	84	0	0	450	20	222	98	32	38	18	4	8	170	40	44	44	78	134	114	118	312	58	56
ENSMUSG00000095845	0	0	0	0	2	0	2	0	0	0	2	4	0	0	0	6	0	4	4	4	0	8	9	18	4	16	22	6
ENSMUSG00000095832	99	332	123	165	123	214	161	48	68	70	368	154	151	68	22	108	184	172	288	142	166	136	216	184	186	204	190	201
ENSMUSG00000095789	0	12	4	25	0	0	0	3	10	12	58	34	7	19	0	41	114	13	0	10	2	4	12	34	2	8	8	0
ENSMUSG00000095720	0	0	0	0	0	0	0	0	0	0	0	0	0	0	0	0	0	2	0	0	0	0	0	0	0	0	0	0
ENSMUSG00000095687	264	4026	1146	1301	281	525	1697	875	1689	1122	5109	3993	798	392	73	553	694	2914	1988	644	452	1224	1193	1288	1014	972	1164	1495
ENSMUSG00000095654	0	0	0	0	0	0	0	0	0	0	0	2	0	0	0	0	0	0	0	0	0	0	0	0	0	0	0	0
ENSMUSG00000095625	0	0	0	0	0	0	0	0	0	0	0	0	0	0	0	0	0	0	0	0	0	0	0	0	0	0	0	0
ENSMUSG00000095609	0	0	0	0	0	0	0	0	0	0	0	0	0	0	0	0	0	6	0	0	58	0	0	0	0	4	0	2
ENSMUSG00000095595	262	456	249	304	371	653	292	201	1340	20	397	234	179	97	52	217	191	883	72	120	911	435	297	280	371	667	287	405
ENSMUSG00000095567	1343	1706	2416	2408	973	1064	2287	1304	3196	1966	5275	3782	2457	3117	739	1366	2325	2589	1064	1718	1059	1415	1587	1621	1666	1568	1719	1079
ENSMUSG00000095562	0	0	0	0	0	0	0	0	0	0	0	0	0	0	0	0	0	0	0	0	0	0	0	0	0	0	0	0
ENSMUSG00000095559	0	0	0	0	0	0	0	0	0	0	0	0	0	0	0	0	0	0	2	0	0	0	0	0	0	0	0	0
ENSMUSG00000095540	0	0	0	0	0	0	0	0	0	0	0	0	0	0	0	0	0	0	0	0	0	0	0	0	0	0	0	0
ENSMUSG00000095538	6	2	0	2	0	2	0	0	0	2	48	16	2	4	0	4	19	8	46	2	0	227	187	214	1784	1140	38	1407
ENSMUSG00000095464	380	471	431	425	306	925	437	275	694	246	1070	726	316	331	129	259	385	788	201	341	195	205	281	365	381	870	248	300
ENSMUSG00000095463	150	514	166	486	730	486	681	173	1200	126	596	298	311	410	248	1324	1386	1117	811	1243	593	1298	1038	1048	953	1900	2032	1181
ENSMUSG00000095440	18	97	10	30	125	78	66	36	58	10	76	58	44	110	52	28	30	60	20	91	2	41	42	58	28	22	62	32
ENSMUSG00000095412	0	0	0	0	0	0	0	0	0	0	0	0	0	0	0	0	0	0	0	0	0	0	0	0	0	0	0	0
ENSMUSG00000095407	222	18	0	0	16	6	0	2	0	0	0	0	0	4	0	440	589	4	4	0	0	0	0	0	0	0	0	0
ENSMUSG00000095385	0	0	0	0	0	0	0	0	0	0	0	0	0	0	0	0	0	0	0	0	0	0	0	0	0	0	0	0
ENSMUSG00000095365	0	0	0	0	0	0	0	0	0	0	0	0	0	0	0	0	0	0	0	0	0	0	0	0	0	0	2	0
ENSMUSG00000095304	1006	41	57	49	137	271	182	478	121	955	2028	1586	415	236	97	16	22	2013	357	600	392	146	25	20	18	20	19	12
ENSMUSG00000095286	0	0	0	0	0	0	0	0	0	0	0	0	0	0	0	0	0	0	0	0	0	0	0	0	0	0	0	0
ENSMUSG00000095276	0	0	0	0	0	0	10	2	6	0	80	100	83	0	0	0	0	0	6	0	4	6	2	2	2	10	2	4
ENSMUSG00000095240	0	0	0	0	0	0	0	0	0	0	0	0	0	0	0	0	0	0	0	0	0	0	0	0	0	0	0	0
ENSMUSG00000095224	0	0	0	0	0	0	0	0	0	0	0	0	0	0	0	0	0	0	34	0	0	6	10	0	4	8	2	14
ENSMUSG00000095213	0	0	0	0	0	0	0	0	0	0	0	0	0	0	0	0	0	0	0	0	0	0	0	0	0	0	0	0
ENSMUSG00000095138	0	0	0	0	0	0	0	0	0	0	0	0	0	0	0	0	0	0	0	0	0	0	0	0	0	0	0	0
ENSMUSG00000095115	226	331	146	231	369	192	215	112	260	142	1246	956	651	352	150	206	198	464	237	335	191	661	339	250	331	608	446	305
ENSMUSG00000095105	6	12	10	4	0	0	0	0	0	2	168	112	88	23	6	0	0	4	30	0	0	2	6	2	6	8	8	6
ENSMUSG00000095098	957	300	458	498	449	1202	209	139	690	173	1378	1077	300	424	126	219	634	983	888	725	100	1394	1086	1842	1813	1545	1348	1136
ENSMUSG00000095061	0	0	0	0	0	0	0	0	0	0	0	0	0	0	0	0	0	0	0	0	0	0	0	0	0	0	0	0
ENSMUSG00000095028	240	399	576	248	764	498	322	249	4301	60	1147	932	382	991	243	115	307	866	571	793	206	40	6	6	58	0	22	46
ENSMUSG00000095026	0	0	0	0	0	0	0	0	0	0	0	0	0	0	0	0	0	0	0	0	0	2	0	0	0	2	2	0
ENSMUSG00000094995	0	0	0	0	0	0	0	0	0	0	0	0	0	0	0	0	0	0	0	0	0	0	0	0	0	0	0	0
ENSMUSG00000094985	0	0	0	0	109	156	128	38	0	0	4	6	2	0	0	2	0	0	4	0	0	0	0	0	0	8	0	2
ENSMUSG00000094973	2374	2454	2594	2564	1518	2212	1545	831	2622	1751	5005	3411	1921	2315	847	1227	2191	2768	1739	2353	1682	2180	2251	2419	2770	2482	2258	1804
ENSMUSG00000094958	0	0	0	2	12	0	0	0	0	0	0	0	0	0	0	4	2	8	4	0	2	2	4	6	0	6	10	2
ENSMUSG00000094935	87	84	26	32	76	80	130	48	143	24	136	70	31	16	8	44	71	128	30	98	60	221	187	326	198	493	276	204
ENSMUSG00000094928	0	0	0	0	0	0	2	0	0	0	0	0	0	0	0	0	0	0	4	0	0	0	2	2	0	2	0	0
ENSMUSG00000094910	0	0	0	0	0	0	6	4	58	2	0	0	0	0	0	0	4	0	0	0	0	2	0	0	2	0	0	0
ENSMUSG00000094893	0	0	0	0	0	0	0	0	0	0	0	0	0	0	0	0	0	16	0	0	0	0	0	0	0	0	0	0
ENSMUSG00000094870	287	411	293	328	255	196	106	54	78	127	376	210	119	143	44	86	138	404	328	310	182	246	285	279	343	388	332	320
ENSMUSG00000094845	0	2	2	2	4	6	0	2	0	2	2	0	0	0	0	0	0	6	0	0	0	0	0	0	0	0	2	0
ENSMUSG00000094841	0	0	0	0	0	0	0	0	0	0	0	0	0	0	0	0	0	0	0	0	0	0	0	0	0	0	0	0
ENSMUSG00000094763	0	0	0	0	0	0	0	0	0	0	0	0	0	0	0	0	0	0	0	0	0	0	0	0	0	0	0	0
ENSMUSG00000094719	0	0	0	0	0	0	0	0	0	0	0	0	0	0	0	0	0	0	0	0	0	0	0	0	0	0	0	0
ENSMUSG00000094690	0	0	0	0	0	0	0	0	0	0	0	0	0	0	0	0	0	0	0	0	0	0	0	0	0	0	0	0
ENSMUSG00000094685	236	192	148	152	171	287	181	77	306	58	387	222	98	90	49	129	212	456	147	246	98	234	183	185	273	265	196	221
ENSMUSG00000094661	0	13	2	14	0	0	2	2	104	0	0	0	0	0	0	0	0	2	0	0	0	18	2	6	46	0	6	10
ENSMUSG00000094649	172	217	251	209	77	118	98	43	214	142	520	297	148	186	58	104	187	194	84	74	72	70	246	256	162	177	227	105
ENSMUSG00000094626	0	0	0	0	0	0	0	0	0	0	10	4	0	0	2	2	0	0	6	2	0	0	2	6	6	2	11	2
ENSMUSG00000094613	0	0	0	0	0	0	0	0	0	0	0	0	0	0	0	0	0	0	0	0	0	0	0	0	0	0	0	0
ENSMUSG00000094595	20	2	4	16	10	20	8	2	12	0	8	0	2	6	6	6	24	14	4	8	4	11	8	8	36	48	18	8
ENSMUSG00000094584	0	0	0	0	0	0	0	0	0	0	0	0	0	0	0	0	0	0	0	0	0	0	0	0	0	0	0	0
ENSMUSG00000094500	0	0	0	4	0	0	0	2	0	0	0	0	0	0	0	0	0	0	0	0	0	0	0	0	0	0	2	2
ENSMUSG00000094487	0	0	0	0	0	0	0	0	0	0	0	0	0	0	0	0	0	0	0	0	0	0	0	0	0	0	0	0
ENSMUSG00000094483	72	210	98	166	136	132	109	48	285	108	634	355	169	193	60	185	205	214	141	162	98	170	115	126	121	138	226	126
ENSMUSG00000094445	0	0	0	0	0	0	0	0	0	0	0	0	0	0	0	0	0	0	0	0	0	0	0	0	0	0	0	0
ENSMUSG00000094443	8	72	216	250	0	2	4	0	26	0	18	6	20	102	4	16	18	52	44	62	28	362	60	44	553	152	34	49
ENSMUSG00000094430	0	0	0	0	0	0	0	0	0	0	0	0	0	0	0	0	0	0	0	0	4	14	0	0	6	2	0	0
ENSMUSG00000094350	0	0	0	0	0	0	0	0	0	0	0	0	0	0	0	0	0	0	0	0	0	0	0	0	0	0	0	0
ENSMUSG00000094311	0	0	0	0	0	0	0	0	0	0	0	0	0	0	0	0	0	0	0	0	0	0	2	0	0	0	0	0
ENSMUSG00000094282	0	0	0	2	0	8	0	0	0	0	0	0	2	4	2	0	0	2	0	0	0	0	0	0	0	0	0	0
ENSMUSG00000094219	0	0	0	0	4	6	0	0	0	0	0	0	0	0	0	2	0	10	2	0	0	0	0	0	0	0	0	0
ENSMUSG00000094212	0	0	0	0	0	0	0	0	0	0	0	0	0	0	0	0	0	0	0	0	0	0	0	0	0	0	0	0
ENSMUSG00000094204	0	0	0	0	0	0	0	0	0	0	0	0	0	0	2	0	0	0	0	0	0	0	0	0	0	0	0	0
ENSMUSG00000094186	0	0	0	0	0	0	0	0	0	0	0	0	0	0	0	0	0	0	0	0	0	0	0	0	0	0	0	0
ENSMUSG00000094130	119	135	134	153	58	62	131	70	86	119	100	40	30	30	4	111	159	120	122	222	84	77	83	94	142	118	84	124
ENSMUSG00000094114	10	69	28	20	18	32	10	2	44	12	68	18	20	18	10	2	12	44	54	18	14	30	36	32	42	68	51	30
ENSMUSG00000094112	0	0	0	0	0	0	0	0	0	0	0	0	0	0	0	0	0	0	0	0	0	0	0	0	0	0	0	0
ENSMUSG00000094035	0	0	0	0	70	118	0	0	0	0	2	0	0	0	0	0	0	10	0	0	2	0	0	0	0	2	0	2
ENSMUSG00000094024	0	0	0	0	0	0	0	0	0	0	0	0	0	0	0	0	0	0	0	0	0	0	0	0	0	0	0	0
ENSMUSG00000094018	0	0	0	0	0	0	0	0	0	10	102	83	20	42	16	0	0	0	495	0	0	2	4	10	0	0	4	2
ENSMUSG00000093989	678	2146	636	995	862	2415	1411	861	2481	651	3013	2691	1099	1161	431	847	1159	3983	740	2728	615	1227	1264	2569	1176	1683	1743	1143
ENSMUSG00000093957	0	0	0	0	0	0	0	0	0	0	0	0	0	0	0	0	0	0	0	0	0	0	0	0	0	0	0	0
ENSMUSG00000093938	0	6	0	0	4	2	6	0	2	6	4	0	0	2	2	2	8	4	0	2	2	4	0	4	2	2	2	6
ENSMUSG00000093930	2330	6533	6691	5752	579	226	219	154	1326	1020	734	312	568	807	310	1549	1432	1253	1782	608	1504	907	454	402	665	847	338	713
ENSMUSG00000093904	944	1365	1471	1429	571	929	270	135	1549	663	2781	1586	937	1002	265	557	731	3193	1392	1864	3518	2528	2009	1951	2769	3913	2697	1976
ENSMUSG00000093865	0	4	2	0	0	0	0	0	0	0	0	0	0	0	0	0	0	0	38	0	0	0	0	0	0	0	0	0
ENSMUSG00000093812	0	0	0	0	0	0	0	0	0	0	0	0	0	0	0	0	0	0	0	0	0	0	0	0	0	0	0	0
ENSMUSG00000093806	0	0	0	4	0	0	0	0	0	0	0	0	0	0	0	10	14	0	2	0	2	0	0	0	0	0	0	0
ENSMUSG00000093804	0	0	0	0	0	0	0	0	0	0	0	0	0	0	0	0	0	0	0	0	0	0	0	0	0	0	0	0
ENSMUSG00000093752	489	383	315	331	582	773	414	148	458	477	1601	874	605	465	164	200	339	1395	241	819	276	301	504	568	509	808	554	560
ENSMUSG00000093668	4	10	4	2	0	0	0	0	2	0	2	0	0	0	0	0	0	4	0	6	2	4	0	0	2	4	0	2
ENSMUSG00000093626	0	0	0	0	0	0	0	0	0	0	0	0	0	0	0	0	0	0	0	0	0	0	0	0	0	0	0	0
ENSMUSG00000093550	0	0	0	0	0	0	0	0	0	0	0	0	0	0	0	0	0	0	0	0	0	2	0	0	0	2	0	0
ENSMUSG00000093536	0	0	0	0	0	0	0	0	0	0	0	0	0	0	0	0	2	0	0	2	0	0	0	0	0	0	0	0
ENSMUSG00000093445	1055	2037	1445	1891	760	946	1093	534	1768	670	3329	2833	1200	1202	364	551	1015	1493	569	838	939	958	1015	1524	1283	1180	857	995
ENSMUSG00000092607	206	290	188	249	301	604	155	82	562	287	446	305	137	163	62	100	157	620	106	259	188	508	401	627	473	486	575	335
ENSMUSG00000092592	0	0	0	0	0	0	0	0	0	0	0	0	0	0	0	0	0	0	0	0	0	0	0	0	0	0	0	0
ENSMUSG00000092586	6	8	2	0	0	2	0	0	4	0	6	0	0	0	0	0	0	0	2	0	0	0	0	0	0	0	0	0
ENSMUSG00000092558	164	122	138	130	138	52	30	12	47	0	300	172	130	68	36	113	166	246	134	293	103	250	211	311	216	290	322	186
ENSMUSG00000092519	0	0	2	2	0	0	0	0	0	0	0	0	0	0	0	0	0	0	0	0	0	0	0	0	0	0	0	0
ENSMUSG00000092518	0	0	0	0	0	0	0	0	2	6	30	20	8	20	12	2	0	0	0	0	0	0	0	0	0	2	0	2
ENSMUSG00000092417	482	1235	988	661	221	337	554	327	268	403	1487	1001	596	579	183	301	685	613	947	392	311	805	1038	1491	902	1098	973	582
ENSMUSG00000092322	0	0	0	0	0	0	0	0	0	0	0	0	0	0	0	0	0	0	0	0	0	0	0	0	0	0	0	0
ENSMUSG00000092305	0	0	0	0	287	484	6	14	0	0	0	0	0	0	0	0	0	2	0	0	0	0	14	2	4	0	6	0
ENSMUSG00000092252	0	8	12	8	10	12	8	0	10	2	12	6	10	6	2	2	0	16	0	0	8	4	2	3	4	4	4	6
ENSMUSG00000092251	0	0	0	0	0	0	0	0	0	0	0	0	0	0	0	0	0	0	0	0	0	0	0	0	2	0	0	0
ENSMUSG00000092244	0	0	0	0	0	0	0	0	0	0	0	0	0	0	0	0	0	0	0	0	0	0	0	0	0	0	0	0
ENSMUSG00000092233	0	2	0	0	8	8	8	6	18	2	22	10	0	4	2	2	0	168	6	10	2	8	6	4	4	4	4	0
ENSMUSG00000092210	0	0	0	0	0	0	0	0	0	0	0	0	0	0	0	0	0	0	0	0	0	0	0	0	0	0	0	0
ENSMUSG00000092192	2	14	6	4	40	22	475	294	54	2	4	0	0	21	0	14	12	16	29	52	42	52	54	54	40	93	42	73
ENSMUSG00000092164	0	0	0	0	0	0	0	0	0	0	0	0	0	0	2	0	0	0	0	0	0	0	0	0	0	0	0	0
ENSMUSG00000092118	8	169	75	103	80	110	2	10	220	26	68	59	31	24	6	26	66	48	6	8	20	34	32	28	43	54	16	18
ENSMUSG00000092116	912	1122	1775	1492	291	710	823	531	5550	740	3112	2190	1521	589	233	516	1216	2641	662	1743	1184	1351	1205	1543	1812	4635	1230	1204
ENSMUSG00000092083	2	15	0	2	8	6	10	0	0	0	0	0	0	10	4	44	68	0	0	0	0	0	400	429	4	20	192	0
ENSMUSG00000092060	0	0	0	0	0	0	4	2	0	0	0	0	0	0	0	2	0	8	0	0	0	0	0	6	0	2	0	2
ENSMUSG00000092043	0	0	0	0	0	0	0	0	0	0	0	0	0	0	0	0	0	0	0	0	0	0	0	0	0	0	0	0
ENSMUSG00000092035	52	2	52	42	65	104	6	0	120	145	1915	1395	2003	434	1055	24	58	58	83	50	204	203	83	78	1577	3179	250	955
ENSMUSG00000092009	134	10	172	204	0	0	40936	29155	2	10	444	240	86	74	46	50	118	601	21214	44904	192	0	0	0	0	0	0	0
ENSMUSG00000091996	0	0	0	0	0	0	0	0	0	0	0	0	0	0	0	0	0	0	0	0	0	0	0	0	0	0	0	0
ENSMUSG00000091972	0	0	0	0	0	0	0	0	0	0	0	0	0	0	0	0	0	0	0	0	0	2	0	2	0	0	0	4
ENSMUSG00000091964	354	1126	367	561	282	406	488	171	304	201	1066	810	400	397	151	137	232	382	259	177	133	305	305	358	318	494	379	341
ENSMUSG00000091955	0	0	2	0	298	1598	427	252	4318	30	2	2	12	10	10	2034	3619	7330	1138	1001	1125	1277	1381	1987	1257	2737	963	752
ENSMUSG00000091937	0	0	0	0	0	0	0	0	0	0	0	0	0	0	0	0	0	0	0	0	0	0	0	0	0	0	0	0
ENSMUSG00000091900	232	98	138	175	96	126	67	23	130	34	200	86	78	114	16	264	274	206	177	285	166	259	201	180	425	248	250	201
ENSMUSG00000091898	109	2	2	12	8	28	4	8	48	35	22	13	0	0	0	80	167	8	4	2	22	8	6	12	357	27	10	0
ENSMUSG00000091890	0	12	12	5	0	0	0	0	4	0	2	2	0	0	0	0	0	14	69	6	0	12	0	4	14	24	0	48
ENSMUSG00000091873	0	0	0	0	0	0	0	0	0	0	0	0	0	0	0	0	0	0	0	0	0	0	0	0	0	0	0	0
ENSMUSG00000091867	0	4	4	0	0	0	6	6	0	0	2	0	4	0	0	0	6	348	0	0	0	0	0	0	2	0	12	2
ENSMUSG00000091863	0	0	0	0	0	0	0	0	0	0	0	0	0	0	0	0	0	12	0	0	0	0	0	0	0	0	0	0
ENSMUSG00000091811	4	48	0	10	39	71	35	18	88	24	72	89	24	220	58	22	88	252	50	116	40	104	158	251	141	176	261	140
ENSMUSG00000091803	26	265	334	348	103	218	68	44	344	221	298	296	114	131	35	62	156	220	74	89	89	74	118	102	96	267	108	125
ENSMUSG00000091780	88	372	214	228	303	507	225	147	622	3682	970	682	268	406	144	482	976	1121	1348	198	644	791	792	1133	867	918	982	460
ENSMUSG00000091735	0	0	0	0	0	0	0	2	0	0	2	0	0	0	2	0	0	0	0	0	0	0	0	2	0	0	4	0
ENSMUSG00000091722	0	0	0	2	0	0	0	0	0	0	0	0	0	0	0	0	0	0	0	0	0	0	0	0	0	0	0	0
ENSMUSG00000091721	0	0	0	0	0	0	0	0	0	0	0	0	0	0	0	0	0	0	0	0	0	0	0	0	0	0	0	0
ENSMUSG00000091712	42	0	2	10	0	4	2	0	0	0	2	4	0	0	0	6	4	2	4	0	0	0	0	0	0	0	0	2
ENSMUSG00000091685	0	2	0	0	0	0	0	0	0	0	0	0	0	0	0	0	0	0	0	0	0	0	0	0	0	0	0	0
ENSMUSG00000091680	0	8	0	2	2	0	0	0	0	0	2	0	2	0	2	0	0	0	0	0	0	0	0	2	0	0	0	0
ENSMUSG00000091662	0	0	0	0	0	0	0	0	0	0	0	0	0	0	0	0	0	0	0	0	0	0	0	0	0	0	0	0
ENSMUSG00000091648	0	8	0	0	0	0	0	0	0	19	30	24	26	0	0	0	0	22	4	0	0	10	0	0	6	26	0	6
ENSMUSG00000091636	0	0	0	0	2	0	0	0	0	0	0	0	0	0	0	0	0	0	0	0	0	0	0	0	0	0	0	0
ENSMUSG00000091625	136	54	138	133	159	488	137	91	526	103	714	371	187	272	57	86	162	250	142	217	137	333	242	304	587	464	249	216
ENSMUSG00000091558	0	0	0	0	0	0	0	0	0	0	0	0	0	0	0	0	0	0	0	0	0	0	0	0	0	0	0	0
ENSMUSG00000091556	0	0	0	0	0	0	0	0	0	0	0	0	0	0	0	0	0	0	0	0	0	0	0	0	0	0	0	0
ENSMUSG00000091537	943	1152	1090	1135	290	744	579	474	1755	324	1956	1504	630	587	193	533	1214	1598	479	966	334	1219	922	972	1279	1553	698	766
ENSMUSG00000091530	0	0	0	0	2	0	10	0	0	0	0	0	0	4	0	0	0	0	2	0	2	2	2	0	4	0	0	0
ENSMUSG00000091526	0	0	0	0	0	0	0	0	0	2	0	0	0	0	0	0	0	46	0	0	0	0	0	0	0	0	0	0
ENSMUSG00000091519	0	0	0	0	0	0	2	2	0	0	0	0	0	2	0	0	0	0	10	0	0	0	0	0	0	0	0	0
ENSMUSG00000091497	0	0	0	0	0	0	0	0	0	0	0	0	0	0	0	0	0	0	0	0	0	0	0	0	0	0	0	0
ENSMUSG00000091490	0	0	0	0	0	0	0	0	0	0	0	0	0	0	0	0	0	0	0	0	0	0	0	0	0	0	2	0
ENSMUSG00000091476	0	20	10	10	0	0	0	0	2	0	0	0	2	0	0	0	0	0	2	0	0	0	0	0	0	6	0	0
ENSMUSG00000091455	0	0	0	0	12	30	6	0	0	2	0	2	0	0	8	0	0	0	0	0	0	0	0	0	0	2	0	4
ENSMUSG00000091423	0	0	0	0	0	0	0	0	0	0	0	0	0	0	0	0	0	0	0	0	0	2	0	2	2	2	0	0
ENSMUSG00000091402	0	0	0	0	0	0	0	0	0	0	0	0	0	0	0	0	0	0	0	0	0	0	0	0	0	0	0	0
ENSMUSG00000091396	0	0	0	0	0	0	0	0	0	0	0	0	0	0	0	0	0	0	0	0	0	0	0	0	0	0	0	0
ENSMUSG00000091387	0	2	6	2	10	24	0	0	0	4	0	0	0	0	0	24	16	2	6	0	26	33	37	14	35	26	45	25
ENSMUSG00000091386	0	0	0	0	0	0	0	0	0	0	0	0	0	0	0	0	0	0	0	0	0	0	0	0	0	0	0	0
ENSMUSG00000091376	0	0	0	0	0	0	0	0	0	0	0	0	0	0	0	0	0	0	0	0	0	0	0	0	0	0	0	0
ENSMUSG00000091345	2	0	6	8	0	0	0	0	10	0	8	6	2	0	0	0	2	4	0	40	74	71	2	0	2	120	0	32
ENSMUSG00000091337	430	421	563	817	635	681	360	180	254	108	1914	917	533	187	82	248	347	1979	1160	560	770	1085	923	1073	1608	3028	1433	1247
ENSMUSG00000091297	0	0	0	0	0	0	0	0	0	0	0	0	0	0	0	0	0	0	0	0	0	0	0	0	0	0	0	0
ENSMUSG00000091277	114	697	389	456	30	42	69	32	66	90	248	166	116	70	20	85	118	419	125	251	306	283	260	252	414	456	236	288
ENSMUSG00000091264	46	13	15	22	0	6	10	9	28	16	86	84	28	163	91	43	86	70	11	8	23	61	19	12	34	67	30	22
ENSMUSG00000091248	0	0	0	0	0	0	0	0	0	0	0	0	0	0	0	0	0	0	0	0	0	0	0	0	0	0	0	0
ENSMUSG00000091243	42	1232	677	1264	1076	1301	1649	657	565	439	842	429	589	845	350	610	421	2783	138	120	217	343	140	83	105	234	175	224
ENSMUSG00000091215	0	0	0	0	0	0	0	0	0	0	0	0	0	0	0	0	0	0	0	0	0	0	0	0	0	0	0	0
ENSMUSG00000091175	0	0	0	0	0	0	0	0	0	0	0	0	0	0	0	0	0	0	0	0	0	0	0	0	0	0	0	0
ENSMUSG00000091174	0	0	0	0	0	0	0	0	0	0	0	0	0	0	0	0	0	0	0	0	0	0	0	0	0	0	0	0
ENSMUSG00000091155	0	0	0	0	10	26	0	0	0	0	0	0	0	0	0	0	0	14	2	0	0	0	0	0	0	0	0	0
ENSMUSG00000091129	0	0	0	0	2	0	0	0	0	0	0	0	0	0	0	0	0	0	0	0	0	0	0	0	0	0	0	0
ENSMUSG00000091119	0	22	38	54	0	0	4	0	218	0	2	2	2	0	2	0	0	12	0	0	0	0	0	0	0	0	0	0
ENSMUSG00000091091	0	0	0	0	0	0	2	0	0	0	0	0	0	2	0	0	0	0	0	4	6	0	0	0	0	0	2	0
ENSMUSG00000091089	0	0	2	0	2	2	6	2	0	0	34	22	0	0	0	0	0	2	0	137	0	0	2	6	0	2	6	0
ENSMUSG00000091055	0	0	0	0	0	2	0	0	0	0	2	0	0	0	0	0	0	0	0	0	0	0	0	0	0	0	0	0
ENSMUSG00000091043	0	4	0	0	0	0	0	2	2	2	0	0	0	4	0	0	0	0	0	0	0	0	0	0	0	0	0	0
ENSMUSG00000091034	0	0	0	0	0	0	0	0	0	0	0	0	0	0	0	0	0	0	0	0	0	2	0	0	0	4	0	0
ENSMUSG00000091017	0	0	0	6	0	0	0	0	0	0	0	0	0	0	0	0	0	0	0	0	0	8	20	16	10	30	32	28
ENSMUSG00000091013	0	0	0	0	0	0	2	2	0	0	104	36	66	0	0	0	0	0	0	0	0	0	0	0	0	0	0	0
ENSMUSG00000091002	0	2	0	0	8	0	0	0	0	0	0	2	0	0	0	0	0	0	0	2	0	2	10	8	2	0	0	2
ENSMUSG00000090958	3437	3002	513	180	2845	1662	169	92	126	611	222	209	382	519	209	20	9	2250	322	2063	6	258	70	70	200	68	6	94
ENSMUSG00000090946	57	71	42	18	102	105	26	12	32	12	460	331	107	96	24	20	20	277	39	41	127	78	46	61	42	90	74	54
ENSMUSG00000090935	36	35	63	41	43	66	54	28	14	24	210	102	64	34	34	27	18	204	78	65	51	50	47	34	30	60	66	26
ENSMUSG00000090919	0	5	10	6	4	8	14	4	36	2	40	14	8	8	0	4	0	0	2	6	4	6	0	2	42	14	0	20
ENSMUSG00000090897	0	0	0	0	0	0	0	0	0	0	0	0	0	0	0	0	0	0	0	0	0	0	0	0	0	0	4	0
ENSMUSG00000090894	0	0	0	0	0	0	0	0	0	0	0	0	0	0	0	0	0	0	0	0	0	0	0	0	0	0	0	0
ENSMUSG00000090863	0	0	0	0	0	0	0	0	0	0	0	0	0	0	0	10	4	8	0	48	16	6	87	100	24	172	129	32
ENSMUSG00000090862	8567	11501	12802	15885	6992	11982	6607	3493	21029	6827	16885	14236	8073	8346	2610	5757	13485	22855	8063	13698	11008	19567	12795	16991	18742	31618	16183	14333
ENSMUSG00000090843	0	38	2	6	2	2	24	12	18	0	55	20	20	2	0	2	4	2	18	2	21	28	2	18	2	16	16	8
ENSMUSG00000090840	0	0	0	0	0	4	0	0	16	0	0	2	0	0	0	0	6	0	0	18	4	26	8	16	25	26	12	22
ENSMUSG00000090824	0	4	0	0	0	0	0	0	0	0	2	0	0	0	0	0	0	0	0	0	0	0	0	0	0	0	0	0
ENSMUSG00000090812	0	0	0	0	8	10	16	8	0	0	14	4	4	2	0	0	0	28	2	0	2	2	0	3	2	4	2	0
ENSMUSG00000090799	16	0	2	2	4	18	92	38	0	2	100	46	8	0	0	0	2	2	2	30	0	0	0	2	0	2	0	2
ENSMUSG00000090747	0	0	0	0	0	0	0	0	0	0	0	0	0	0	0	0	0	0	0	0	0	0	0	0	0	0	0	0
ENSMUSG00000090738	0	0	0	0	0	0	0	0	0	0	0	0	0	0	0	0	0	0	0	0	0	0	0	0	0	0	0	0
ENSMUSG00000090733	10778	14373	11295	11308	9386	18832	7985	3121	19064	9488	25125	22764	15043	13662	5298	7461	17264	24286	5701	12618	8375	12875	10469	14127	17782	17414	12805	11777
ENSMUSG00000090710	0	0	0	0	0	0	0	0	0	0	0	0	0	0	0	0	0	0	0	0	0	0	0	0	0	0	0	0
ENSMUSG00000090698	8	8	4	14	2	0	2	0	6	0	16	12	0	0	2	4	12	10	12	6	0	2	4	0	4	16	2	4
ENSMUSG00000090685	0	4	4	4	10	14	0	0	18	4	4	2	0	53	16	0	0	0	4	2	0	4	10	0	0	10	0	12
ENSMUSG00000090667	0	0	0	0	0	0	0	0	0	0	0	0	0	0	0	0	0	0	14	0	0	0	4	2	0	0	0	0
ENSMUSG00000090626	28	6	6	30	20	54	25	8	86	18	58	48	26	165	30	12	18	246	6	96	147	56	160	132	142	120	94	52
ENSMUSG00000090622	0	0	0	0	0	0	0	0	0	0	0	0	0	0	0	0	0	6	0	0	2	0	0	0	0	0	0	2
ENSMUSG00000090553	372	610	1680	1423	223	539	309	260	1075	241	1039	678	270	499	130	319	504	1501	387	844	553	762	714	875	1345	1323	709	613
ENSMUSG00000090550	0	0	0	0	0	0	0	0	0	0	0	0	0	4	2	0	0	0	0	0	0	0	0	0	0	0	0	0
ENSMUSG00000090523	301	0	34	51	773	608	82	34	469	16	344	228	134	153	42	16	37	196	128	59	38	36	44	48	57	36	66	48
ENSMUSG00000090515	0	0	0	0	0	0	0	0	0	0	0	0	0	0	0	0	0	0	0	0	0	0	0	0	0	0	0	0
ENSMUSG00000090509	0	0	0	0	0	0	3	1	0	0	0	0	0	0	0	0	0	0	0	0	0	0	0	0	0	0	0	0
ENSMUSG00000090486	0	2087	219	188	593	1705	3951	5932	250	0	2852	1379	1384	30	12	454	529	6	464	265	655	6	10	18	8	2	100	0
ENSMUSG00000090461	0	0	0	0	0	0	0	0	0	0	0	0	0	0	0	0	0	0	0	0	0	0	0	0	0	0	0	0
ENSMUSG00000090451	14106	24222	29628	31167	8815	16171	7614	4857	27645	10546	25125	19168	9050	14922	5111	6878	21275	33529	11277	14990	10141	16248	13657	15186	21071	22949	16046	13953
ENSMUSG00000090439	0	0	0	2	0	0	0	0	0	0	0	2	0	0	0	0	0	0	4	2	0	0	0	0	0	0	2	0
ENSMUSG00000090394	39	2	26	37	26	14	36	26	0	6	90	68	41	82	20	29	34	48	34	32	24	52	52	40	41	26	62	36
ENSMUSG00000090369	0	2	2	0	0	0	6	2	2	2	0	0	0	0	0	0	0	2	0	2	2	2	2	0	0	0	0	0
ENSMUSG00000090356	0	0	0	0	0	0	0	0	0	0	0	0	0	0	0	0	0	0	0	0	0	4	2	0	2	0	0	0
ENSMUSG00000090336	0	0	0	0	0	0	0	0	0	0	0	0	0	0	0	0	0	0	0	0	2	0	0	0	0	0	0	2
ENSMUSG00000090326	0	0	0	0	0	0	0	0	0	0	0	0	0	2	0	0	0	0	2	0	0	0	0	0	0	0	0	0
ENSMUSG00000090314	0	0	0	0	2	0	0	0	0	2	6	4	4	4	4	0	0	0	0	0	0	0	0	0	0	0	0	0
ENSMUSG00000090306	0	21	0	0	0	0	0	0	0	0	0	0	0	0	0	0	0	0	0	0	0	0	0	0	0	0	0	0
ENSMUSG00000090302	0	0	0	0	0	0	0	0	0	0	0	0	0	0	0	0	0	0	0	0	0	0	0	0	0	0	0	0
ENSMUSG00000090298	0	16	2	4	0	0	0	0	0	0	0	0	0	0	0	0	0	0	0	46	0	0	2	4	2	0	0	0
ENSMUSG00000090291	4	2	0	4	12	6	0	0	0	16	8	2	10	6	4	0	4	0	6	8	0	8	0	0	4	6	4	0
ENSMUSG00000090290	196	957	2624	1609	825	1000	397	194	332	302	2305	1637	654	436	94	213	512	212	209	128	342	200	134	168	295	292	182	138
ENSMUSG00000090273	0	67	33	38	54	108	0	0	18	99	239	186	130	96	26	4	4	8	20	4	2	2	2	0	6	18	10	6
ENSMUSG00000090266	325	192	285	205	157	299	121	55	454	281	1714	948	555	385	188	118	260	897	89	98	147	297	132	133	238	502	146	302
ENSMUSG00000090264	364	175	470	236	22	66	76	73	131	169	42	50	10	32	8	36	111	146	40	22	57	113	247	244	114	168	318	143
ENSMUSG00000090262	276	136	36	34	44	62	72	46	48	71	158	96	68	84	48	36	74	388	349	180	163	250	188	202	302	499	262	309
ENSMUSG00000090247	1103	1117	995	1521	365	604	1160	680	2970	278	1406	970	409	649	168	238	464	1042	495	607	1059	1538	2030	3187	1532	1985	2054	1259
ENSMUSG00000090236	0	0	6	0	0	0	0	0	0	0	18	10	18	0	0	2	4	0	2	2	0	0	0	2	0	0	2	2
ENSMUSG00000090231	195	247	195	98	571	756	20	2	76	14	3538	2538	567	14	18	18	46	640	172	171	7239	8	28	28	59	32	124	1257
ENSMUSG00000090223	25	0	11	0	4	4	0	0	0	0	12	8	0	0	0	111	146	0	1	0	0	0	0	0	0	0	0	0
ENSMUSG00000090215	0	202	8	8	2	0	64	10	6	38	100	32	52	32	50	12	27	106	20	146	101	53	73	50	99	26	132	119
ENSMUSG00000090213	494	906	1014	542	757	1468	315	192	644	530	3086	2589	1397	804	292	522	938	2595	612	1342	511	1441	1086	1594	1534	1483	1160	801
ENSMUSG00000090210	4712	0	4	36	18	18	30	0	2	8	1111	665	50	28	4	38	105	4	78	4	6	251	60	37	107	1437	16	240
ENSMUSG00000090206	0	0	0	0	0	0	0	0	0	0	2	6	2	0	0	0	0	0	0	0	0	0	0	0	0	0	0	0
ENSMUSG00000090202	0	0	0	0	0	0	0	0	0	0	0	0	0	0	0	0	0	0	0	0	0	0	0	0	0	0	0	0
ENSMUSG00000090173	0	2	0	0	0	0	50	6	0	2	6	2	2	2	2	0	4	36	0	0	4	2	0	0	0	40	2	6
ENSMUSG00000090164	0	0	0	0	0	0	0	0	0	0	0	0	0	0	0	0	0	0	0	0	0	0	0	0	0	0	0	0
ENSMUSG00000090150	78	355	244	352	374	264	432	154	54	74	668	320	205	164	52	77	122	550	640	284	315	448	502	465	302	535	617	432
ENSMUSG00000090141	0	0	0	0	4	4	0	0	0	0	0	0	0	2	0	0	0	0	0	0	0	0	0	0	0	4	0	0
ENSMUSG00000090122	0	0	0	0	0	0	0	0	0	0	10	2	2	0	0	0	1	0	0	0	0	0	2	0	4	0	0	0
ENSMUSG00000090121	0	19	10	12	2	0	194	94	80	0	10	8	0	0	0	0	0	0	0	0	0	0	0	2	0	0	2	0
ENSMUSG00000090115	8	28	14	24	44	30	47	16	18	6	50	44	30	38	10	6	35	66	34	96	42	116	94	77	116	97	123	65
ENSMUSG00000090113	0	0	0	0	0	0	0	0	0	0	0	0	0	0	0	0	0	0	0	0	0	0	0	0	0	0	0	0
ENSMUSG00000090112	433	227	166	382	453	340	195	52	142	92	543	258	206	246	92	136	190	274	137	220	674	587	582	389	325	538	663	377
ENSMUSG00000090110	22	106	58	49	8	70	58	22	42	8	86	56	24	12	4	10	19	34	16	16	12	12	31	40	25	30	50	22
ENSMUSG00000090107	0	0	0	0	0	0	0	0	0	0	0	0	0	0	0	0	0	0	0	0	0	0	0	0	0	0	0	0
ENSMUSG00000090100	114	114	38	72	123	102	130	32	160	40	170	90	95	50	20	95	60	246	58	54	119	199	98	34	44	152	181	42
ENSMUSG00000090084	1615	843	140	366	296	272	4	12	655	367	2502	1681	639	659	521	166	253	1039	793	3225	312	2494	1426	1618	1588	2066	4055	1231
ENSMUSG00000090083	243	334	229	285	509	579	252	100	455	33	256	154	105	91	40	148	237	846	248	666	608	458	750	717	593	578	836	410
ENSMUSG00000090077	0	24	6	20	65	54	10	0	34	21	241	180	64	88	16	20	94	322	12	80	68	85	279	282	90	152	355	151
ENSMUSG00000090071	0	0	0	0	23	42	0	2	2	2	18	0	0	4	4	0	0	0	0	0	0	0	0	0	0	0	0	0
ENSMUSG00000090066	0	0	0	0	0	0	6	0	0	69	4	2	0	0	4	234	72	66	0	0	2	12	0	0	12	0	0	2
ENSMUSG00000090061	0	0	34	124	0	2	0	0	0	0	0	0	0	0	0	14	4	0	0	0	0	0	2	0	0	4	2	0
ENSMUSG00000090053	62	2	105	139	47	22	10	20	24	36	186	132	52	8	8	147	110	240	51	164	92	87	10	4	29	32	2	26
ENSMUSG00000090035	26	68	112	108	44	32	18	12	92	12	56	20	22	32	18	48	50	202	135	146	151	336	251	191	255	228	309	106
ENSMUSG00000090019	0	0	0	0	0	0	0	4	0	10	0	0	0	0	0	0	0	0	0	0	0	0	0	0	0	0	0	0
ENSMUSG00000090000	205	160	211	190	262	576	140	68	296	90	793	396	286	197	74	183	230	1067	237	379	226	293	188	224	490	839	247	244
ENSMUSG00000089984	10	70	38	14	6	8	15	8	30	91	178	130	41	26	14	16	53	142	14	8	14	28	69	76	51	88	50	60
ENSMUSG00000089953	0	0	2	4	0	0	0	0	0	0	0	0	0	2	0	0	0	0	0	0	0	0	2	2	2	0	1	2
ENSMUSG00000089922	0	0	0	2	0	0	0	0	0	0	0	0	0	0	0	0	0	4	0	0	0	0	0	0	0	0	0	0
ENSMUSG00000089917	737	2753	515	621	263	298	355	218	1056	950	3601	3126	1325	1769	411	466	1249	1255	526	615	357	573	1170	1231	459	1246	1279	733
ENSMUSG00000089911	554	1518	1094	1097	505	504	337	160	578	306	1371	691	687	453	163	544	759	1186	335	475	553	639	567	412	563	466	654	436
ENSMUSG00000089901	0	0	0	0	0	2	0	0	0	0	0	0	0	0	0	0	0	808	0	0	2	0	0	0	0	34	2	4
ENSMUSG00000089876	0	0	34	38	24	42	232	124	357	59	440	257	302	527	186	37	67	54	462	18	0	8	16	10	0	6	18	0
ENSMUSG00000089872	244	677	334	555	1022	840	260	188	432	92	668	381	387	330	202	208	251	832	303	418	269	575	442	414	331	542	537	304
ENSMUSG00000089862	4	36	6	20	8	12	18	6	16	4	139	82	12	27	8	6	4	126	16	0	18	30	20	36	20	34	26	26
ENSMUSG00000089840	0	0	0	0	0	0	0	0	0	0	0	0	0	0	0	0	0	0	0	0	0	0	0	0	0	0	0	0
ENSMUSG00000089837	667	222	480	560	69	28	96	28	46	67	920	959	294	215	89	99	98	52	224	378	14	86	23	38	148	40	42	26
ENSMUSG00000089832	1448	1799	2037	1619	660	996	2907	1772	1189	711	2602	2065	1253	1176	347	851	1536	1640	836	839	595	1296	2841	4675	1061	1861	1914	747
ENSMUSG00000089824	808	1091	711	740	713	792	628	217	505	593	1481	838	1042	843	263	620	638	613	415	664	487	623	777	542	645	832	715	600
ENSMUSG00000089809	0	0	0	0	0	0	0	0	2	0	0	0	0	0	0	0	0	0	0	0	0	0	0	0	0	0	0	0
ENSMUSG00000089798	2	0	1	4	0	0	0	0	0	0	0	0	2	0	0	0	0	0	0	0	0	2	0	0	0	0	0	0
ENSMUSG00000089774	20	24	4	50	10	32	4	20	100	10	92	18	28	18	6	8	4	20	18	12	0	223	210	122	167	174	324	62
ENSMUSG00000089762	330	1389	1781	2420	608	842	761	423	745	456	766	543	298	671	108	100	429	1510	413	475	196	301	482	922	668	512	771	536
ENSMUSG00000089704	1539	4215	3961	4576	1778	1572	1309	678	1369	1208	7688	6732	2538	2289	1189	1113	2044	6776	1416	2039	1432	3170	1658	2095	2178	2758	2512	1065
ENSMUSG00000089687	48	38	189	90	8	10	4	4	18	2	84	62	34	0	0	12	12	64	39	2	10	6	22	10	26	12	22	4
ENSMUSG00000089682	109	227	76	90	187	117	153	84	98	36	375	192	127	103	16	82	74	367	151	192	90	112	154	138	138	176	170	126
ENSMUSG00000089678	0	0	0	2	0	0	0	0	0	0	0	0	0	0	0	0	2	0	0	0	0	0	0	0	0	0	0	0
ENSMUSG00000089669	16	12	20	22	4	4	2	4	16	19	74	40	23	14	6	12	44	36	573	0	2	104	124	161	122	106	239	154
ENSMUSG00000087687	148	411	540	508	115	407	243	247	333	228	1006	776	346	298	106	151	252	674	147	168	139	225	429	518	357	473	363	312
ENSMUSG00000087666	0	0	0	0	0	0	0	0	0	0	0	0	0	0	0	0	0	0	0	0	0	0	0	0	0	0	0	0
ENSMUSG00000087651	37	14	10	9	34	60	4	0	8	61	376	208	17	22	2	0	2	20	0	4	0	0	0	0	0	0	0	0
ENSMUSG00000087444	0	0	0	0	0	0	0	0	0	0	0	0	0	0	0	0	0	0	0	0	0	0	0	0	0	0	0	0
ENSMUSG00000087408	0	10	8	14	4	10	22	24	160	52	604	540	143	106	50	0	0	772	201	299	16	30	36	49	25	12	22	95
ENSMUSG00000087385	0	0	0	0	0	0	0	0	0	0	0	0	0	0	0	0	0	0	0	0	0	0	0	0	0	0	0	0
ENSMUSG00000087370	2	10	4	4	14	15	2	0	0	0	50	8	20	16	4	4	2	12	2	6	10	10	4	2	2	10	2	6
ENSMUSG00000087279	7	6	2	0	24	58	4	4	0	0	12	10	6	8	2	74	239	0	2	2	0	8	2	0	12	8	0	14
ENSMUSG00000087260	400	316	407	395	300	572	263	120	719	262	622	396	215	332	153	183	391	788	300	522	128	281	278	263	318	321	276	307
ENSMUSG00000087247	2	0	0	0	8	130	2	0	0	2	0	0	0	0	2	0	0	246	0	0	0	0	0	0	0	0	0	0
ENSMUSG00000087236	0	0	0	0	0	0	0	0	0	2	0	0	0	0	0	0	0	4	4	0	0	2	0	0	0	0	0	6
ENSMUSG00000087230	0	0	0	0	0	2	0	0	0	0	0	0	0	0	0	0	0	0	0	0	0	0	0	0	0	0	0	0
ENSMUSG00000087182	0	0	0	0	0	0	0	0	0	0	0	0	0	0	0	0	0	0	0	0	0	0	0	0	0	0	0	0
ENSMUSG00000087166	4	0	0	0	2	0	0	0	0	0	0	0	0	0	0	0	0	0	0	2	0	0	0	0	0	8	0	2
ENSMUSG00000087141	2	4	4	0	1	8	16	14	4	0	10	0	0	2	2	0	0	22	0	0	8	2	0	6	0	4	4	4
ENSMUSG00000087075	0	2	10	8	0	0	0	0	0	0	0	0	0	0	0	0	0	0	0	0	0	0	0	0	0	0	0	2
ENSMUSG00000087006	433	12	4	24	416	1125	87	18	2	20	137	130	121	787	314	30	144	236	34	79	343	122	2	6	64	50	6	71
ENSMUSG00000086965	0	0	0	0	0	0	0	0	0	12	104	101	48	24	12	36	120	152	8	0	6	12	2	4	24	28	10	6
ENSMUSG00000086938	368	913	581	585	594	1914	482	490	1018	239	3135	2442	771	528	115	262	480	1471	540	561	466	751	844	1088	822	899	875	476
ENSMUSG00000086848	0	0	0	0	0	0	0	0	0	0	0	0	0	0	0	0	0	0	0	0	0	0	0	0	0	0	0	0
ENSMUSG00000086598	0	10	0	4	0	0	0	0	2	2	4	0	2	2	0	0	0	0	8	2	32	20	10	14	34	52	16	4
ENSMUSG00000086596	88	4	2	16	20	0	100	110	0	8	42	30	4	6	4	10	6	12	2	16	74	84	12	22	353	4462	16	153
ENSMUSG00000086564	0	10	2	4	2	6	0	0	6	0	0	0	0	0	0	2	4	2	0	4	2	0	0	0	0	8	0	2
ENSMUSG00000086361	0	0	0	0	0	0	0	0	0	0	0	0	0	0	0	0	0	6	0	0	0	0	0	0	0	0	0	0
ENSMUSG00000086277	0	20	4	2	0	2	0	0	0	0	0	0	0	0	0	2	4	0	6	0	0	0	0	2	0	0	0	2
ENSMUSG00000086228	6	0	0	0	6	34	14	4	14	0	0	0	0	2	0	0	0	56	0	2	0	0	36	40	0	2	20	8
ENSMUSG00000086158	16	2	10	2	12	16	117	90	6	0	6	4	4	0	2	0	0	142	13	4	27	30	19	18	38	20	38	30
ENSMUSG00000086056	0	0	0	0	0	0	0	0	0	0	84	68	29	0	0	0	0	0	0	0	0	0	0	0	4	0	0	0
ENSMUSG00000086040	0	22	6	0	8	4	38	3	0	0	0	0	0	0	0	2	0	0	2	0	0	0	0	0	0	0	0	0
ENSMUSG00000086022	0	0	0	0	6	16	0	0	0	0	0	2	0	0	0	0	0	74	0	0	0	0	0	0	0	0	0	0
ENSMUSG00000085858	0	0	0	0	0	0	0	0	0	0	0	0	0	0	0	0	0	0	0	0	0	0	0	0	0	0	0	0
ENSMUSG00000085795	239	118	182	298	82	94	26	6	209	374	866	787	219	697	498	1066	1180	2960	807	391	206	765	627	1110	786	682	699	463
ENSMUSG00000085793	20	30	35	34	20	32	16	16	105	2	50	38	32	20	10	12	4	38	42	28	40	38	56	36	45	40	24	42
ENSMUSG00000085601	0	0	0	0	0	0	0	0	0	0	0	0	0	0	0	0	0	0	0	0	0	0	0	0	0	0	0	0
ENSMUSG00000085584	0	0	0	2	0	0	0	2	0	4	0	0	0	2	0	0	0	8	0	8	0	0	0	0	0	32	0	0
ENSMUSG00000085576	0	6	2	22	24	26	38	24	0	0	0	0	0	0	0	0	0	0	0	0	0	0	0	0	0	0	0	0
ENSMUSG00000085272	0	0	0	2	29	44	0	0	0	2	0	0	0	0	0	0	0	0	0	0	0	0	2	0	0	0	0	0
ENSMUSG00000085111	0	0	2	2	0	0	0	0	0	0	0	0	0	0	0	0	0	0	0	0	0	0	0	0	0	0	0	0
ENSMUSG00000084989	0	22	4	9	2	0	0	0	0	0	0	0	0	0	0	0	2	12	138	0	0	4	0	0	4	0	0	2
ENSMUSG00000084957	96	60	23	16	188	473	8	10	130	88	769	430	251	143	48	53	68	216	39	135	96	144	239	332	213	352	181	102
ENSMUSG00000084945	0	0	0	0	0	0	0	0	0	0	0	0	0	0	0	0	0	0	0	0	0	0	0	0	0	0	0	0
ENSMUSG00000084902	0	0	0	0	0	0	0	0	0	0	0	0	0	0	0	0	0	0	0	0	2	0	0	0	0	0	0	0
ENSMUSG00000084897	0	0	130	160	1334	804	2	2	0	0	44	30	39	73	16	2	0	4	0	0	0	29	40	66	18	162	2	70
ENSMUSG00000084883	28	26	67	68	391	320	12	10	313	32	62	50	18	122	22	16	4	304	49	54	82	417	127	189	282	421	165	336
ENSMUSG00000084845	58	8	16	22	2	6	18	14	14	21	187	142	24	32	14	2	16	8	0	2	8	29	28	57	35	44	53	30
ENSMUSG00000084786	587	443	789	977	532	2175	608	419	1187	289	2776	2136	584	489	183	119	353	1001	440	592	247	585	830	955	753	1286	785	820
ENSMUSG00000084234	0	0	0	0	0	0	0	0	0	0	0	0	0	0	0	0	0	0	0	0	0	0	0	0	0	0	0	0
ENSMUSG00000084174	0	0	0	0	0	0	0	0	0	0	0	0	0	0	0	0	0	0	0	0	0	0	0	0	0	0	0	0
ENSMUSG00000084128	0	20	56	58	2	0	6	0	38	26	436	217	117	0	2	2	2	50	2	6	2	0	4	0	2	6	6	0
ENSMUSG00000083695	0	0	0	0	0	0	0	0	0	0	0	0	0	0	0	0	0	0	0	0	0	0	4	0	0	10	0	8
ENSMUSG00000083649	1933	6467	6188	6307	4095	7267	1577	1111	7449	2004	7964	6068	4031	5357	1598	2768	3785	6421	3047	7023	4048	4547	2306	2373	7608	4797	2747	2091
ENSMUSG00000083282	2012	2416	753	916	2767	4074	5171	2710	386	3444	5788	5106	2714	2310	819	585	1007	1579	1038	1020	524	1679	1740	2202	1346	1762	2938	1448
ENSMUSG00000083193	0	0	0	0	0	0	0	0	0	0	0	0	0	0	0	0	0	0	0	0	0	0	0	0	0	0	0	0
ENSMUSG00000083012	0	0	0	0	0	0	0	0	0	167	466	276	139	199	59	130	223	459	102	418	201	393	460	400	267	387	483	201
ENSMUSG00000082976	0	0	0	0	0	0	0	0	0	0	0	0	0	0	0	0	0	0	0	0	0	0	0	0	0	0	0	0
ENSMUSG00000082361	0	0	2	0	0	0	6	4	0	0	0	0	0	0	2	62	26	0	4	4	0	10	14	20	16	24	30	38
ENSMUSG00000082229	136	0	65	43	0	0	0	0	0	4	122	50	34	24	14	54	80	6	14	36	0	0	4	2	0	0	0	0
ENSMUSG00000082101	0	2	18	72	0	4	0	0	0	0	0	0	0	0	0	0	0	2	2	0	0	2	0	0	0	0	0	0
ENSMUSG00000081984	0	0	0	0	0	0	0	0	0	0	0	0	0	0	0	0	0	10	0	12	0	8	2	2	4	26	0	0
ENSMUSG00000081769	0	0	0	0	0	0	0	0	0	0	0	0	0	0	0	0	0	0	0	0	0	0	0	0	0	0	0	0
ENSMUSG00000081683	12	44	4	56	6	2	26	4	2	415	4533	2549	749	581	197	0	0	0	0	0	4	6	0	2	2	4	4	0
ENSMUSG00000081650	0	0	0	0	0	0	0	0	0	4	2	0	0	0	0	0	0	900	3027	4439	4034	5076	2306	2772	6905	5913	2485	2803
ENSMUSG00000081649	0	0	0	0	0	0	0	4	0	0	0	2	0	6	4	0	0	0	0	0	0	0	0	0	0	0	0	0
ENSMUSG00000081534	99	676	115	268	721	1390	222	88	1771	20	981	687	438	194	69	349	350	1871	605	1736	210	969	552	704	582	1279	554	512
ENSMUSG00000081044	0	0	0	0	0	0	2	2	0	0	0	0	0	0	0	0	0	0	0	0	0	0	0	0	0	0	0	0
ENSMUSG00000080727	0	0	0	0	0	0	0	0	0	0	0	0	0	0	0	0	0	0	0	0	0	0	0	0	0	0	0	0
ENSMUSG00000080316	2	50	24	70	55	72	80	53	64	24	224	187	68	14	6	36	62	132	26	51	10	30	46	49	55	68	80	32
ENSMUSG00000080268	1041	828	561	504	458	860	277	190	652	294	971	747	406	439	69	173	298	746	308	628	377	495	722	973	444	620	462	343
ENSMUSG00000080115	9	39	44	57	40	25	10	12	75	4	92	63	34	16	14	17	73	74	2	62	48	31	18	20	20	122	44	14
ENSMUSG00000079941	1581	2985	3295	2841	2833	6252	1890	1077	5870	2184	7083	4495	2812	2100	581	1284	2314	5574	1260	3326	2126	2094	2143	2530	2754	3172	2521	1942
ENSMUSG00000079842	0	0	0	0	0	0	0	0	0	0	0	0	0	0	0	0	0	0	0	0	0	0	0	0	0	0	0	0
ENSMUSG00000079834	0	4	0	0	92	110	155	89	50	149	733	386	242	57	28	152	159	550	87	60	55	115	240	224	75	160	190	164
ENSMUSG00000079737	0	0	0	0	0	0	0	0	0	0	0	0	0	0	0	0	0	74	0	0	52	32	28	14	72	60	22	50
ENSMUSG00000079722	0	0	0	0	0	0	0	0	0	0	0	0	0	0	0	0	0	0	0	0	0	0	0	0	0	0	0	0
ENSMUSG00000079710	0	4	10	4	0	0	0	0	6	0	8	0	4	0	0	0	4	2	0	2	0	12	2	0	10	20	4	14
ENSMUSG00000079685	0	0	0	0	0	0	0	0	0	0	0	0	0	0	0	0	0	0	16	0	0	0	0	4	2	0	6	0
ENSMUSG00000079681	0	0	0	6	20	28	20	0	46	0	52	34	28	28	18	121	407	6	24	12	8	4	2	10	2	2	8	10
ENSMUSG00000079679	0	0	0	0	8	2	0	0	0	0	2	0	0	0	0	0	0	0	4	2	0	0	0	0	0	0	0	0
ENSMUSG00000079677	273	214	220	223	60	142	74	61	212	222	1371	997	517	257	60	173	394	880	565	392	296	490	511	761	633	866	522	428
ENSMUSG00000079666	0	0	0	0	0	0	0	0	0	0	0	0	0	0	0	0	0	0	2	0	0	0	0	2	0	0	0	0
ENSMUSG00000079662	10	48	116	38	2	2	20	8	0	4	170	126	10	18	2	12	14	10	24	23	2	28	8	16	12	32	50	14
ENSMUSG00000079659	179	125	126	80	73	114	59	24	204	109	289	182	74	101	17	44	91	108	92	38	50	56	65	84	84	80	91	47
ENSMUSG00000079658	470	898	671	668	436	878	418	288	1531	311	1567	1151	475	570	205	232	364	1769	461	750	539	701	893	888	1105	1348	826	649
ENSMUSG00000079657	38	108	37	22	2	10	284	70	208	16	62	64	34	4	18	14	34	18	59	0	10	12	14	20	12	26	22	8
ENSMUSG00000079654	0	38	14	61	0	0	16	8	2	10	18	10	10	11	2	12	20	2	4	2	0	8	4	6	14	0	0	2
ENSMUSG00000079652	0	4	8	0	0	0	0	2	0	0	0	0	0	0	0	0	0	0	2	0	0	0	2	4	4	6	2	0
ENSMUSG00000079644	0	0	0	0	0	0	0	0	0	0	22	12	10	0	0	0	0	0	0	0	2	0	0	0	0	0	0	0
ENSMUSG00000079642	0	0	0	0	0	0	0	0	0	0	0	0	0	0	0	0	0	0	0	0	0	0	0	0	0	0	0	0
ENSMUSG00000079641	7436	5682	8076	8278	116	10	1859	1059	6779	3281	13320	10062	3351	5579	1452	1750	4530	12304	2548	2476	3912	7723	4800	6958	12196	15658	5562	5196
ENSMUSG00000079625	0	0	0	0	0	8	4	0	2	0	2	6	0	2	4	0	0	12	0	0	0	4	0	2	4	2	2	2
ENSMUSG00000079614	524	453	338	446	421	386	274	116	701	131	780	386	276	208	86	318	417	436	193	243	244	119	92	64	122	46	96	55
ENSMUSG00000079610	34	295	218	252	196	492	311	187	1668	136	340	232	104	20	15	62	111	624	211	36	74	86	114	106	70	178	150	117
ENSMUSG00000079608	2	18	14	10	0	2	0	0	2	6	192	112	20	24	10	0	2	0	24	0	8	5	6	2	16	2	14	23
ENSMUSG00000079606	0	0	0	0	0	0	0	0	8	0	0	0	0	0	0	0	0	0	0	0	0	0	0	0	0	0	0	0
ENSMUSG00000079605	76	106	144	167	143	88	18	2	34	40	320	230	146	78	44	63	83	232	36	116	89	119	158	139	68	88	189	81
ENSMUSG00000079598	0	5	0	4	16	20	12	20	16	22	98	96	38	0	2	0	0	4	2	0	2	2	0	2	0	22	2	0
ENSMUSG00000079592	1435	2254	225	227	35	196	586	414	1306	168	1255	1071	429	462	54	473	967	8259	4127	4141	2030	4686	5956	8434	3682	7677	5455	6471
ENSMUSG00000079588	2	0	4	3	16	2	0	2	0	0	8	6	0	0	0	0	0	0	6	0	0	0	0	0	39	0	0	0
ENSMUSG00000079584	0	0	0	0	0	0	0	0	0	0	0	0	0	0	0	0	0	0	0	0	2	0	0	0	0	10	0	0
ENSMUSG00000079583	0	0	0	0	0	0	0	0	0	0	0	0	0	0	0	0	0	0	0	0	0	0	0	0	0	0	0	0
ENSMUSG00000079580	0	0	0	0	0	0	0	0	0	2	0	0	0	0	2	0	0	0	0	0	0	0	4	0	12	8	2	2
ENSMUSG00000079579	0	0	0	0	0	0	0	0	0	0	0	0	0	0	0	0	0	0	0	0	0	0	0	0	0	0	0	0
ENSMUSG00000079578	0	0	0	2	0	0	0	0	0	0	0	0	0	0	0	0	0	98	0	0	0	0	0	0	0	0	0	0
ENSMUSG00000079563	0	0	0	0	6	2	2	0	2	0	0	0	0	0	0	0	0	0	0	0	2	0	0	0	0	0	2	0
ENSMUSG00000079562	1330	2819	1107	1159	1425	2088	1000	510	2132	749	3527	2561	1719	1500	447	897	1608	2716	1377	2458	1923	3729	3009	2942	2487	2379	3213	1780
ENSMUSG00000079559	0	0	0	0	8	2	6	2	4	6	187	106	24	34	22	2	2	6	2	0	0	2	26	14	4	6	18	14
ENSMUSG00000079557	199	275	166	189	229	836	722	429	2216	236	1763	1523	721	699	255	977	1448	2130	1305	1121	1078	1288	1411	2076	1000	2007	1535	1043
ENSMUSG00000079555	2	179	180	188	275	560	291	140	274	226	322	152	92	197	44	269	339	853	48	142	85	258	142	133	365	168	108	86
ENSMUSG00000079554	0	0	0	0	0	0	0	0	6	2	46	4	6	16	14	0	0	0	10	2	22	0	0	0	4	2	0	0
ENSMUSG00000079553	62	245	4557	4014	196	150	502	345	1093	1061	257	197	230	1501	92	569	743	376	158	831	241	3119	196	264	4827	867	254	341
ENSMUSG00000079550	0	0	0	2	0	0	0	0	0	2	0	0	0	4	0	0	0	4	0	0	2	6	0	4	2	6	2	12
ENSMUSG00000079547	0	2	0	0	2	6	0	0	0	2	2	2	8	2	4	8	8	118	0	169	605	231	139	293	236	512	222	271
ENSMUSG00000079539	0	0	0	0	0	0	0	0	0	0	0	0	0	0	0	0	0	0	0	0	0	0	0	0	0	0	0	0
ENSMUSG00000079525	0	0	0	0	6	0	0	0	0	0	0	0	0	0	0	0	0	0	0	0	0	0	0	0	0	0	0	0
ENSMUSG00000079523	401	5155	4429	7450	2078	11442	2105	1611	28621	444	9801	7151	1420	2427	1033	4593	7599	17271	2949	1343	3694	3476	3800	5917	3553	11110	2556	1771
ENSMUSG00000079522	0	0	0	0	0	0	0	0	0	0	0	0	0	0	0	0	0	0	0	0	0	0	0	0	2	0	0	0
ENSMUSG00000079521	0	0	0	0	0	0	0	0	0	0	0	0	0	0	0	0	0	0	0	0	0	0	0	0	0	0	0	0
ENSMUSG00000079519	0	0	0	0	0	0	0	0	0	0	0	0	0	0	0	0	0	2	0	0	0	0	0	0	2	0	0	0
ENSMUSG00000079517	0	0	0	0	4	6	0	0	10	0	0	2	0	0	0	0	0	4	0	0	0	0	0	0	0	0	0	0
ENSMUSG00000079516	0	0	0	0	0	0	0	0	0	0	0	0	0	0	0	0	0	0	0	0	0	0	0	0	0	0	0	0
ENSMUSG00000079511	30	59	64	109	16	20	244	40	100	68	387	242	88	58	24	40	100	132	34	38	77	98	104	110	73	214	139	110
ENSMUSG00000079508	112	333	239	174	126	184	153	110	269	92	284	174	148	158	48	116	170	190	109	401	132	258	175	170	300	212	188	128
ENSMUSG00000079502	0	6	18	34	1	4	0	6	0	0	2	0	0	0	0	0	0	2	4	2	0	8	2	6	4	0	2	25
ENSMUSG00000079487	1919	2748	1763	2243	2263	1988	1368	528	1646	2000	9987	5889	3208	2184	984	1351	1875	2553	1873	2335	1310	1886	1765	1686	1797	2176	2423	1972
ENSMUSG00000079484	126	22	134	34	2	6	659	425	2243	6	10	4	2	14	2	2	2	2625	290	933	487	658	436	545	482	804	735	817
ENSMUSG00000079481	24	0	10	52	49	40	36	24	20	30	120	42	183	58	20	173	190	256	22	24	4	35	8	2	0	6	16	2
ENSMUSG00000079480	264	370	504	561	136	415	296	136	656	173	642	417	233	249	62	136	282	664	259	237	232	488	881	1254	788	858	725	419
ENSMUSG00000079478	218	664	412	350	420	676	286	204	1020	349	842	839	429	460	156	438	748	708	354	858	470	616	567	789	926	1128	797	452
ENSMUSG00000079477	2565	4142	1662	1906	2228	3000	1805	1185	3741	2430	11198	9207	4688	4030	1386	1396	2110	4880	2869	2301	1300	2505	2943	2882	2766	2585	3154	2716
ENSMUSG00000079476	0	0	0	0	0	0	0	0	0	0	0	0	0	0	0	0	0	0	0	0	0	0	0	0	0	0	0	0
ENSMUSG00000079471	0	0	0	0	0	0	0	0	0	0	0	0	0	0	0	0	0	0	0	0	0	0	0	2	4	8	4	2
ENSMUSG00000079470	571	2504	947	1034	413	412	716	382	726	779	1256	676	346	271	109	281	469	652	442	713	146	367	317	340	600	404	414	251
ENSMUSG00000079469	241	131	128	152	436	655	519	182	513	50	538	253	138	92	28	160	242	224	66	94	64	129	135	99	109	124	86	110
ENSMUSG00000079466	2	0	0	0	0	0	2	2	0	0	0	0	0	0	0	0	0	0	0	0	2	0	0	0	0	0	0	0
ENSMUSG00000079465	0	6	2	2	0	2	4	0	8	0	4	2	4	0	6	289	224	38	54	20	0	8	2	4	0	0	0	4
ENSMUSG00000079462	0	0	0	0	0	0	0	0	0	0	2	0	0	0	0	0	0	0	0	0	0	0	0	0	0	0	0	0
ENSMUSG00000079460	0	0	0	0	0	0	0	0	0	0	0	0	0	0	0	0	0	0	2	0	0	0	0	0	0	0	0	0
ENSMUSG00000079451	0	0	0	0	0	0	0	0	0	0	4	4	2	0	0	0	0	0	0	0	0	0	0	0	0	0	0	0
ENSMUSG00000079450	0	0	0	0	0	0	0	0	0	0	0	0	0	0	0	0	0	0	0	0	0	0	0	0	0	0	0	0
ENSMUSG00000079445	8	2	0	2	50	85	154	66	4	4	6	8	12	10	2	0	0	2	2	20	12	20	4	2	10	42	0	2
ENSMUSG00000079442	661	457	658	391	861	1954	1177	648	2938	151	1109	945	551	742	248	473	912	776	1194	965	348	1170	797	1171	829	2165	1003	665
ENSMUSG00000079436	0	6	0	2	2	2	0	0	0	2	4	2	0	0	2	0	2	0	4	4	0	2	0	2	0	4	2	2
ENSMUSG00000079434	150	2	0	0	0	0	0	0	0	2	0	0	4	2	0	4	2	0	0	10	4	0	34	24	8	2	43	0
ENSMUSG00000079429	0	0	0	2	0	0	2	0	0	0	18	6	0	8	0	0	0	4	4	6	0	0	0	0	0	0	0	0
ENSMUSG00000079428	0	0	0	0	0	0	0	0	2	0	14	6	0	2	0	0	0	0	0	0	0	0	0	0	10	0	0	0
ENSMUSG00000079427	131	297	238	192	118	138	142	66	399	94	529	308	256	52	22	51	108	382	223	143	48	131	70	62	280	196	42	132
ENSMUSG00000079426	2009	3241	1604	1999	2026	4559	2114	1325	2609	1135	3626	3222	1911	1968	657	1826	2083	3999	1171	1871	1740	2723	1708	2307	2235	2785	2045	1228
ENSMUSG00000079421	0	0	6	8	0	0	0	0	0	0	2	0	0	2	0	0	0	0	0	0	0	0	0	0	0	0	0	0
ENSMUSG00000079418	140	181	116	130	368	400	90	46	562	78	555	312	197	101	42	111	185	328	232	306	319	328	301	249	348	460	244	372
ENSMUSG00000079415	0	16	12	6	16	18	0	0	4	0	6	0	0	6	2	26	14	42	259	10	10	8	4	2	6	4	6	2
ENSMUSG00000079414	0	0	0	0	0	0	0	0	0	0	0	0	0	0	0	0	0	0	0	0	0	0	0	0	0	0	0	0
ENSMUSG00000079355	253	6	6	0	116	136	438	58	8	4	18	12	4	729	254	0	8	70	272	230	2	56	60	89	70	8	18	208
ENSMUSG00000079346	0	0	0	0	0	0	0	0	0	0	0	0	0	0	0	0	0	0	0	0	0	0	0	0	0	0	0	0
ENSMUSG00000079343	2099	18104	3769	5230	468	532	1929	68	188	3920	7890	3904	1670	106	48	180	628	8074	11520	6734	8393	857	3362	3068	2340	4563	5380	4507
ENSMUSG00000079334	341	348	415	503	108	162	42	22	393	86	534	416	174	171	62	120	319	896	708	524	522	1139	1170	1756	832	2367	1522	1347
ENSMUSG00000079330	0	0	0	0	0	0	0	0	0	0	0	0	0	0	0	0	0	0	0	0	0	0	0	0	0	0	0	0
ENSMUSG00000079324	0	0	0	0	0	0	0	0	0	0	0	0	0	0	0	0	0	0	0	0	0	0	0	0	0	0	0	0
ENSMUSG00000079317	94	109	105	57	75	156	20	6	56	31	186	144	48	16	12	55	87	244	47	128	168	78	122	99	213	160	111	126
ENSMUSG00000079316	236	494	198	242	355	769	217	75	160	438	1249	773	187	146	86	84	192	1360	477	212	94	258	425	373	393	335	384	497
ENSMUSG00000079304	0	0	2	0	0	0	0	0	28	0	0	0	0	0	0	0	2	0	2	2	2	4	0	0	0	2	0	0
ENSMUSG00000079293	0	0	0	0	0	0	0	0	0	0	0	0	0	0	0	0	0	0	0	0	0	0	0	0	0	0	0	0
ENSMUSG00000079283	0	0	0	0	0	0	0	0	0	12	79	69	26	10	4	0	0	64	30	130	127	265	104	195	267	703	177	225
ENSMUSG00000079278	0	0	4	0	0	0	0	0	0	0	0	0	0	0	0	0	0	0	0	0	0	0	0	0	0	0	0	0
ENSMUSG00000079261	0	0	0	0	0	0	0	0	0	0	0	0	0	0	0	0	0	0	0	0	0	0	0	0	0	0	0	0
ENSMUSG00000079260	4	30	6	28	22	44	26	6	22	14	12	6	2	0	0	16	33	40	26	16	74	106	53	91	106	80	98	50
ENSMUSG00000079259	0	0	0	0	0	0	4	0	2	4	0	2	0	0	2	0	0	2	0	2	0	0	0	0	0	2	0	0
ENSMUSG00000079258	0	0	0	0	2	0	2	0	0	0	0	0	0	0	0	28	39	0	0	0	0	4	0	2	2	14	2	4
ENSMUSG00000079243	0	0	4	14	8	2	6792	3008	20	2	0	0	0	0	0	10	0	2	0	0	0	4	0	2	36	0	4	0
ENSMUSG00000079242	0	0	0	0	0	0	0	0	0	0	0	0	0	0	0	0	0	148	4	4	45	32	98	131	38	114	102	48
ENSMUSG00000079235	5	2	0	0	2	2	16	8	30	2	8	4	2	4	0	0	0	6	0	12	36	8	12	30	27	124	32	300
ENSMUSG00000079197	1073	2417	1445	1194	597	864	1862	697	1093	288	2771	1619	1244	1219	511	246	596	3044	1638	1507	2318	4771	3105	3566	5908	4402	3808	3380
ENSMUSG00000079184	500	728	456	586	620	1252	1077	559	697	782	1035	466	376	619	203	549	890	1331	234	512	789	528	626	557	809	683	615	630
ENSMUSG00000079183	0	0	0	0	0	0	0	0	0	0	0	0	0	0	0	0	0	0	0	0	0	0	0	0	0	0	0	0
ENSMUSG00000079180	0	0	0	0	0	2	0	0	0	0	0	0	0	0	0	0	0	0	0	0	0	0	0	0	0	0	0	0
ENSMUSG00000079177	0	0	0	0	0	0	339	84	0	0	0	0	0	0	0	0	0	0	2	2	4	74	6	12	10	2	0	4
ENSMUSG00000079165	0	14	10	10	8	0	20	4	8	0	6	10	0	10	0	8	26	120	50	60	18	22	36	44	34	34	44	62
ENSMUSG00000079164	8	42	8	2	0	0	74	2	38	4	22	6	2	14	8	46	114	0	4	4	2	23	0	0	14	10	4	12
ENSMUSG00000079157	0	0	2	4	0	0	0	0	0	2	143	78	114	101	54	0	0	0	0	2	1	0	0	0	2	2	1	2
ENSMUSG00000079144	64	36	33	34	33	30	20	6	26	12	144	62	32	12	2	62	78	30	58	0	16	99	32	29	88	74	73	62
ENSMUSG00000079112	0	0	0	0	0	0	0	0	0	0	0	0	0	0	0	0	0	0	0	0	0	0	0	0	0	0	0	0
ENSMUSG00000079111	1055	1805	2335	2398	1505	1594	1212	534	3313	846	6343	4241	4283	1606	862	1387	2253	4906	1000	2159	1418	1212	840	1022	1593	2680	1144	898
ENSMUSG00000079110	0	4	0	0	0	0	4	0	16	0	0	0	0	0	0	2	6	16	2	18	20	24	0	0	10	64	0	8
ENSMUSG00000079109	145	723	303	518	70	42	272	102	306	127	624	333	314	153	86	314	320	212	533	164	207	244	244	190	188	166	240	119
ENSMUSG00000079108	726	864	599	568	920	1248	556	356	749	332	1322	626	558	670	341	753	887	2358	754	782	1718	958	1187	1157	1453	1783	1217	1103
ENSMUSG00000079105	4	3609	221	343	0	0	12	0	0	0	2	0	2	0	2	2	14	0	12	54	104	26	2	0	111	34	2	242
ENSMUSG00000079104	42	439	334	231	145	126	36	31	282	156	861	504	554	588	270	229	224	518	399	476	146	1344	1590	1494	1919	1461	1786	922
ENSMUSG00000079103	0	0	0	0	4	4	24	270	18	0	36	24	21	6	4	0	0	0	0	0	0	0	0	0	2	0	0	0
ENSMUSG00000079084	256	270	53	66	398	1007	223	127	244	22	34	32	14	18	10	126	186	68	92	104	48	96	115	111	202	166	150	130
ENSMUSG00000079083	140	136	50	92	156	150	215	58	84	50	356	196	162	98	52	143	145	278	110	70	89	169	204	188	188	158	239	115
ENSMUSG00000079076	0	0	0	0	0	0	0	0	0	0	0	0	0	0	0	0	0	0	0	0	0	0	0	0	0	0	0	0
ENSMUSG00000079071	0	12	0	4	0	0	2	0	42	0	0	0	0	0	2	0	6	0	0	0	0	4	0	0	0	0	0	0
ENSMUSG00000079069	0	0	0	0	0	0	2	0	0	0	0	0	0	0	0	0	0	0	0	0	0	0	0	0	0	0	0	0
ENSMUSG00000079057	155	938	1348	827	735	464	236	52	246	54	3986	1969	947	275	139	254	348	1405	469	144	690	173	334	252	123	536	180	264
ENSMUSG00000079056	0	0	0	0	4	2	0	4	0	41	74	89	52	93	20	0	2	18	3	38	0	44	22	39	67	50	93	18
ENSMUSG00000079055	0	34	6	2	0	0	0	0	0	28	0	2	0	0	0	0	2	585	51	0	0	0	0	0	4	4	0	0
ENSMUSG00000079043	62	239	174	288	205	204	258	98	60	76	369	148	203	126	80	216	222	140	74	160	114	126	174	131	148	80	160	82
ENSMUSG00000079042	0	0	0	0	0	0	0	0	2	2	0	0	0	0	0	0	0	0	0	0	2	0	0	0	0	0	0	0
ENSMUSG00000079037	845	203	333	411	490	664	446	372	134	174	841	467	391	758	410	942	633	3085	828	1654	1560	1175	1884	1626	2336	1576	1234	2585
ENSMUSG00000079036	75	105	60	81	126	94	132	52	214	88	284	152	143	114	46	103	125	294	132	225	230	144	108	110	164	304	177	88
ENSMUSG00000079022	26	0	0	6	2	0	4	10	4	42	2	4	0	0	0	16	12	2	2	2	4	0	0	0	6	22	2	0
ENSMUSG00000079020	92	247	190	298	432	378	194	252	351	132	803	634	463	176	92	127	164	769	166	321	286	514	186	241	256	452	233	149
ENSMUSG00000079019	0	0	0	0	0	0	0	0	0	0	2	0	0	0	0	0	0	2	0	0	0	0	0	0	2	0	0	0
ENSMUSG00000079007	0	0	0	0	0	0	0	0	0	0	0	0	0	0	0	0	0	0	0	0	0	0	0	0	0	0	0	0
ENSMUSG00000079003	513	715	842	911	576	820	370	178	584	284	1466	1117	392	478	101	173	562	772	611	768	301	597	402	676	767	772	574	375
ENSMUSG00000079001	0	0	0	0	0	0	0	0	0	0	0	0	0	0	0	0	0	0	0	0	0	0	0	0	0	0	0	0
ENSMUSG00000078998	0	0	0	0	0	0	0	0	0	0	0	0	0	0	0	0	0	0	0	0	0	0	0	0	0	0	0	0
ENSMUSG00000078974	472	1090	802	1041	1365	3194	1555	1067	5398	468	2881	2402	808	676	274	313	571	3728	863	1505	1145	1866	1645	1923	2401	3374	1569	1507
ENSMUSG00000078970	137	218	138	175	51	88	76	32	116	64	180	96	46	100	25	24	44	190	160	78	98	86	140	142	96	88	128	100
ENSMUSG00000078963	0	0	0	0	16	30	2	0	4	0	347	209	26	0	2	0	4	2	0	0	0	0	0	0	0	0	0	0
ENSMUSG00000078958	8	2	2	0	0	0	4	6	4	0	0	0	0	0	2	2	8	0	0	2	0	0	12	4	0	2	0	30
ENSMUSG00000078956	0	0	0	0	0	0	0	0	0	0	0	0	0	0	0	0	0	0	0	0	0	0	0	0	0	0	0	0
ENSMUSG00000078954	446	65	26	0	2	38	152	86	44	0	0	0	0	0	0	0	0	166	66	20	70	2	0	2	18	2	2	18
ENSMUSG00000078949	0	6	0	0	0	0	0	0	0	0	0	0	0	0	0	0	0	4	0	0	0	4	0	0	22	8	0	2
ENSMUSG00000078941	694	572	787	783	855	1108	573	419	2154	574	1142	725	564	594	216	279	549	2969	2400	1893	1260	1734	1527	1489	2102	2487	1603	1402
ENSMUSG00000078940	0	0	0	0	0	0	0	0	0	0	0	0	0	0	0	0	0	0	0	0	0	0	0	0	0	0	0	0
ENSMUSG00000078938	0	0	0	0	0	0	0	0	0	2	0	0	0	0	0	0	2	0	0	0	0	8	125	140	1	34	0	2
ENSMUSG00000078937	6	192	163	295	50	64	12	6	38	377	62	42	15	8	2	40	166	12	123	8	74	70	46	70	62	178	152	34
ENSMUSG00000078935	0	0	0	0	0	0	0	2	2	0	2	0	0	0	0	0	0	0	0	0	0	0	0	0	0	0	0	0
ENSMUSG00000078934	0	0	0	0	0	0	0	0	0	0	0	0	0	0	0	0	0	0	0	0	0	0	0	0	0	0	0	0
ENSMUSG00000078932	0	0	0	0	0	0	0	0	0	2	0	0	0	0	0	0	0	0	0	0	0	0	0	0	0	4	0	2
ENSMUSG00000078931	38	36	79	80	72	104	91	55	132	38	80	48	14	10	2	8	50	126	27	58	24	91	50	72	132	253	66	44
ENSMUSG00000078926	0	0	0	0	0	4	10	2	10	0	0	0	0	0	0	0	0	0	0	0	0	0	0	0	0	0	0	0
ENSMUSG00000078923	645	704	468	709	769	938	575	322	924	467	1279	1054	668	620	226	578	646	2247	662	1257	941	1270	1047	952	1358	1261	1077	766
ENSMUSG00000078920	0	0	0	0	10	10	0	0	2	0	0	0	0	0	0	22	4	0	234	34	8	128	50	51	69	6	46	136
ENSMUSG00000078908	254	274	203	220	189	132	170	89	262	80	484	454	272	146	52	70	97	412	75	134	147	200	177	245	216	308	304	159
ENSMUSG00000078907	2	4	0	0	2	2	4	2	6	12	0	0	0	0	0	0	0	0	0	0	2	14	43	38	30	26	18	14
ENSMUSG00000078813	208	272	142	285	454	758	250	135	230	169	458	332	154	190	47	116	279	629	291	329	265	392	521	583	457	580	551	462
ENSMUSG00000078812	3094	6182	8778	8017	4754	7684	3378	2194	12593	3664	8217	6869	5145	7072	1963	4722	6653	13801	4992	9105	6343	11066	4247	6016	10983	9982	5017	4187
ENSMUSG00000078810	0	0	0	0	0	0	6	0	0	0	0	0	0	0	0	0	0	0	0	0	0	0	0	0	0	0	0	0
ENSMUSG00000078800	0	0	0	0	0	0	0	0	0	0	0	0	0	0	0	0	0	0	2	0	0	0	0	0	0	0	0	0
ENSMUSG00000078796	0	4	0	0	2	2	6	0	4	2	4	6	8	0	2	8	20	130	0	30	2	34	28	20	50	120	18	6
ENSMUSG00000078795	0	158	86	154	0	0	0	0	0	0	0	0	0	0	0	0	0	2	0	0	0	0	0	0	0	0	0	0
ENSMUSG00000078794	400	62	134	120	445	447	559	727	1216	37	116	110	39	155	9	73	166	1343	265	1343	822	454	306	635	488	671	453	404
ENSMUSG00000078789	404	255	311	313	337	486	332	146	454	194	1978	1598	807	872	271	235	423	944	191	266	173	289	199	255	282	446	320	240
ENSMUSG00000078787	2	0	0	0	0	0	0	0	2	6	43	31	20	0	2	0	0	4	2	6	19	6	10	10	6	8	8	12
ENSMUSG00000078786	92	38	72	82	124	106	58	20	40	10	374	236	120	170	60	171	360	134	100	224	150	46	147	193	66	114	120	40
ENSMUSG00000078784	510	262	1077	903	439	1194	280	153	2689	534	1791	1277	616	723	250	88	210	1634	448	809	344	681	510	610	1205	1208	283	690
ENSMUSG00000078783	0	122	116	93	10	4	0	0	0	0	0	0	0	0	0	0	0	0	0	0	6	0	2	4	2	0	0	8
ENSMUSG00000078773	6	28	38	30	55	48	52	16	42	22	60	16	46	40	10	50	46	39	16	30	48	66	22	17	263	198	24	24
ENSMUSG00000078772	0	0	0	0	0	0	0	0	0	0	0	0	0	0	0	0	0	0	0	0	0	0	0	0	0	0	0	0
ENSMUSG00000078771	12	113	25	12	40	38	20	4	10	4	94	60	32	531	191	23	66	50	4	26	4	42	6	4	32	10	2	19
ENSMUSG00000078765	198	10	2	0	0	0	0	0	0	0	186	136	52	138	67	145	361	642	434	382	528	971	1089	1363	1231	1569	1126	832
ENSMUSG00000078762	212	787	581	572	83	86	36	12	206	817	1156	792	714	1281	174	137	309	310	64	604	140	1102	634	822	1338	710	796	328
ENSMUSG00000078753	0	0	0	0	0	0	0	0	0	0	0	0	0	0	0	0	0	0	0	0	0	0	0	0	0	0	0	0
ENSMUSG00000078752	0	0	0	0	0	0	0	0	0	0	0	0	0	0	0	0	0	0	4	0	0	0	0	0	0	0	0	0
ENSMUSG00000078719	6	10	12	23	24	52	87	46	54	14	210	94	39	34	14	2	0	68	143	44	49	37	46	68	141	90	118	321
ENSMUSG00000078716	2528	463	217	225	130	155	439	119	156	80	1004	756	397	306	114	89	148	300	387	86	170	374	929	1288	618	1035	1105	434
ENSMUSG00000078713	27	44	45	51	15	33	25	17	152	7	290	200	32	47	12	17	22	182	25	61	25	42	44	50	45	210	33	33
ENSMUSG00000078706	0	0	0	2	0	0	0	0	0	0	34	18	8	16	2	0	0	503	24	32	0	10	45	43	14	0	83	46
ENSMUSG00000078695	455	202	294	203	25	28	36	20	553	587	1473	1133	532	413	190	327	593	555	1151	1187	420	620	286	526	681	670	522	259
ENSMUSG00000078681	450	327	233	350	253	300	265	152	600	135	534	370	158	322	110	117	243	487	258	402	288	418	627	694	548	659	732	460
ENSMUSG00000078676	1122	1873	1220	1206	1143	1550	1751	727	3406	466	2665	1943	1258	1161	392	730	921	1440	642	1070	791	1258	1405	1353	993	1109	1830	654
ENSMUSG00000078671	1224	1635	649	867	812	884	770	246	604	278	662	326	302	408	224	622	503	762	420	400	482	512	742	513	515	673	1108	544
ENSMUSG00000078657	0	2	4	4	0	0	0	0	0	0	0	0	0	0	0	0	0	0	0	0	0	0	0	0	0	0	0	0
ENSMUSG00000078656	280	247	182	261	138	348	358	180	854	51	734	578	258	105	77	68	169	1025	224	266	217	347	411	509	355	679	352	331
ENSMUSG00000078653	0	0	2	1	2	2	48	18	8	0	2	0	0	0	0	0	0	62	16	0	2	14	0	4	8	10	4	4
ENSMUSG00000078652	787	579	481	521	2363	3048	978	819	3216	308	1568	1058	1172	891	362	421	454	1775	697	1009	807	1432	968	1056	1392	1315	1253	706
ENSMUSG00000078650	2	0	0	0	0	0	0	0	0	0	2	0	0	0	0	0	0	0	2	2	0	0	0	0	0	0	0	0
ENSMUSG00000078648	0	0	0	0	0	0	0	0	0	0	0	0	0	0	0	0	0	0	0	0	0	0	0	0	0	0	0	0
ENSMUSG00000078640	0	0	0	0	0	0	0	0	0	0	0	0	0	0	0	0	0	0	0	0	0	0	0	0	0	0	0	0
ENSMUSG00000078639	0	0	0	0	0	0	0	0	0	86	0	0	0	0	0	0	0	0	2	0	0	0	0	0	0	0	0	0
ENSMUSG00000078630	0	4	0	0	20	24	0	0	18	4	16	6	6	0	0	0	0	12	2	12	14	6	12	11	22	22	12	8
ENSMUSG00000078627	2	0	1	0	0	0	0	0	12	0	32	24	2	0	0	0	0	4	4	5	0	2	0	0	0	2	0	2
ENSMUSG00000078626	0	0	0	0	0	0	0	0	0	0	0	0	0	0	0	2	0	0	0	0	0	0	0	0	0	0	0	0
ENSMUSG00000078624	0	0	0	2	0	0	0	0	0	0	0	0	0	0	0	0	0	0	0	0	0	0	0	0	0	0	0	0
ENSMUSG00000078622	1329	954	656	665	615	649	1043	702	1366	342	2160	1017	748	678	292	599	665	2303	677	692	517	739	780	583	861	928	862	497
ENSMUSG00000078621	0	0	0	0	0	0	0	0	0	0	0	0	0	0	0	0	0	0	0	0	0	0	0	0	0	0	0	0
ENSMUSG00000078619	1858	1753	1468	1443	784	805	783	287	2337	475	2518	2099	1260	1631	435	537	1161	1902	867	2117	1196	1569	1237	1486	1307	1451	1690	856
ENSMUSG00000078612	0	0	0	0	0	0	0	0	0	0	0	0	0	2	6	6	2	0	0	0	0	0	0	0	0	0	0	0
ENSMUSG00000078611	0	2	0	4	6	14	2	0	0	8	0	4	0	8	2	1	6	2	0	4	0	2	6	4	0	4	6	0
ENSMUSG00000078606	2	70	42	62	0	0	0	2	0	2	4	0	0	0	6	12	18	4	14	8	10	4	2	0	6	4	0	0
ENSMUSG00000078605	0	0	0	0	0	0	0	0	0	0	0	0	0	0	0	0	0	0	0	0	0	0	0	0	0	0	0	0
ENSMUSG00000078599	0	0	0	0	0	0	0	0	0	2	0	0	0	0	0	0	0	0	0	0	0	0	0	0	0	0	0	0
ENSMUSG00000078593	0	0	0	0	0	0	0	0	0	0	0	0	0	0	0	0	0	0	0	0	0	0	0	0	0	0	0	0
ENSMUSG00000078591	37	0	0	0	0	0	0	0	0	0	0	0	0	0	0	0	0	0	0	0	0	0	0	0	0	0	0	0
ENSMUSG00000078588	0	127	12	38	46	58	12	4	12	8	36	18	22	11	4	7	16	2	0	4	10	15	2	2	4	26	4	28
ENSMUSG00000078584	31	117	79	106	179	222	191	106	296	148	298	186	96	230	102	31	44	642	109	323	185	280	274	336	252	445	301	275
ENSMUSG00000078577	0	0	0	4	0	0	0	0	0	0	2	0	0	2	0	0	0	0	0	2	0	0	0	0	0	0	6	0
ENSMUSG00000078572	53	51	56	32	74	184	31	29	422	85	355	237	90	110	28	66	91	419	66	80	145	164	206	242	254	400	212	221
ENSMUSG00000078566	2460	3868	2358	5110	1179	1953	2429	931	504	2081	21590	14686	3570	639	755	756	1666	867	265	341	195	441	305	316	648	801	1567	467
ENSMUSG00000078554	0	0	0	2	0	4	30	22	19	12	114	68	16	17	4	2	0	10	6	18	1	0	2	2	0	2	0	0
ENSMUSG00000078552	0	4	6	2	2	8	8	0	4	2	8	10	4	2	2	4	12	2	4	2	0	0	2	4	2	2	0	0
ENSMUSG00000078532	22	0	157	136	275	427	0	4	62	72	48	30	32	128	26	50	56	230	128	287	301	164	87	129	151	68	63	54
ENSMUSG00000078521	4	50	405	309	9	22	4	0	28	4	22	18	22	62	0	40	108	4	20	26	8	58	14	6	182	54	20	6
ENSMUSG00000078518	0	0	0	0	0	0	0	0	0	0	0	0	0	0	0	0	0	2	0	0	0	0	0	0	0	0	0	0
ENSMUSG00000078517	2078	2897	2076	2113	1248	717	1215	903	1036	598	2195	1585	1133	1829	975	1134	1825	1603	940	2072	1691	3413	1426	1685	2315	3255	2409	946
ENSMUSG00000078515	46	488	150	273	273	320	277	62	78	104	192	109	130	56	38	116	105	410	856	1193	652	811	747	606	612	814	924	506
ENSMUSG00000078507	2	0	0	0	0	0	2	0	0	0	0	0	0	0	0	0	0	0	0	0	0	0	0	0	0	0	0	0
ENSMUSG00000078506	0	0	0	0	0	0	0	0	0	0	0	0	0	0	0	0	0	0	0	0	0	0	0	0	0	0	0	0
ENSMUSG00000078505	0	0	0	0	0	0	0	0	0	0	0	0	0	0	0	0	0	0	2	0	0	0	0	0	0	4	0	0
ENSMUSG00000078491	0	0	0	0	0	0	0	0	2	0	0	0	0	0	0	0	0	0	0	0	0	0	0	0	0	0	0	0
ENSMUSG00000078490	38	0	0	18	0	0	2	4	8	0	0	2	6	0	0	0	0	62	6	4	56	2	16	8	0	40	52	16
ENSMUSG00000078486	0	2	2	0	0	0	2	0	0	6	0	0	0	0	0	6	4	134	16	0	70	106	112	114	139	158	181	119
ENSMUSG00000078485	2	9	2	8	20	30	204	32	16	2	6	8	4	0	0	39	63	1024	105	35	325	68	54	56	66	132	90	110
ENSMUSG00000078484	330	444	351	531	87	103	182	75	224	159	1752	1221	481	516	164	178	400	723	239	239	312	211	257	330	237	406	325	230
ENSMUSG00000078453	115	214	267	226	319	520	150	132	237	82	481	432	97	256	112	120	114	573	197	481	404	267	170	178	318	520	209	270
ENSMUSG00000078451	6	6	6	4	34	30	16	2	2	2	0	2	4	6	2	0	4	10	0	4	2	4	2	4	0	2	2	0
ENSMUSG00000078444	0	0	0	0	0	0	0	0	0	0	0	0	0	0	0	0	0	0	0	0	0	0	0	0	0	0	0	0
ENSMUSG00000078442	0	0	0	0	0	0	0	0	0	0	0	0	0	0	0	0	0	2	0	0	0	0	0	0	0	2	0	0
ENSMUSG00000078441	651	907	725	776	542	982	319	148	1191	513	1496	1368	803	997	342	181	294	707	431	1080	716	1200	1393	2157	1199	1985	1591	686
ENSMUSG00000078440	851	1143	704	568	723	1311	420	294	2601	319	1393	1272	622	768	119	154	308	2483	562	1062	698	980	764	1831	1475	1745	860	604
ENSMUSG00000078439	0	0	0	0	6	0	58	32	40	0	8	0	0	0	0	0	6	0	2	0	2	61	12	8	8	14	4	36
ENSMUSG00000078429	2204	1892	1750	1869	1246	683	704	150	1519	525	4563	3868	1861	1677	468	360	498	3237	668	1434	1222	2678	1411	1894	1134	2955	2163	1148
ENSMUSG00000078427	612	1441	1441	1149	511	958	772	367	1326	375	1632	1067	670	859	376	792	1336	1473	555	593	484	576	1028	947	967	1048	641	646
ENSMUSG00000078384	0	2	0	0	0	0	2	0	0	0	0	0	0	0	0	0	0	0	0	0	0	6	0	0	4	8	0	0
ENSMUSG00000078365	0	0	0	0	0	0	0	0	0	0	0	0	0	0	0	0	0	0	4	0	0	0	0	0	2	2	0	2
ENSMUSG00000078350	0	30	178	274	26	44	29	6	49	20	689	524	107	8	10	10	4	151	113	74	0	28	130	172	58	165	74	76
ENSMUSG00000078348	246	314	543	601	261	698	387	236	885	127	517	431	232	354	70	145	219	1083	398	339	548	732	528	964	817	1878	567	526
ENSMUSG00000078320	0	0	0	0	0	0	0	0	0	0	2	0	0	0	0	0	0	0	0	0	0	0	0	0	0	0	0	0
ENSMUSG00000078317	193	169	40	56	142	118	186	83	395	122	605	446	177	186	61	212	439	285	178	1418	776	253	673	998	360	725	1409	315
ENSMUSG00000078315	0	8	0	0	0	0	0	0	0	0	0	0	0	0	0	0	0	0	0	0	0	0	0	0	0	0	0	0
ENSMUSG00000078307	0	0	0	0	0	0	8	8	0	0	54	28	0	28	28	8	4	6	0	0	0	16	0	0	2	0	0	4
ENSMUSG00000078280	0	0	0	0	0	0	0	0	0	0	0	0	0	0	0	0	0	0	0	0	0	0	0	0	0	0	0	0
ENSMUSG00000078254	0	0	0	0	0	0	0	0	0	0	0	0	0	0	0	0	0	0	0	0	0	0	0	2	0	0	0	0
ENSMUSG00000078253	0	0	0	0	0	0	0	0	0	0	0	0	0	0	0	0	0	0	0	0	0	0	0	0	0	0	0	0
ENSMUSG00000078252	0	0	0	0	0	0	0	0	0	0	0	0	0	0	0	0	0	0	0	0	0	0	0	0	0	0	0	0
ENSMUSG00000078249	154	1001	2741	1098	2742	4848	193	53	1559	479	2326	2318	720	1392	110	125	176	1160	1203	1998	265	1136	517	911	2624	365	679	517
ENSMUSG00000078235	53	0	2	0	6	16	40	36	0	0	10	6	2	4	0	11	19	26	0	2	12	0	0	0	0	0	0	4
ENSMUSG00000078234	0	0	0	0	0	0	0	0	0	0	2	0	0	2	2	0	0	0	0	0	0	46	108	118	24	48	158	36
ENSMUSG00000078202	6	47	4	0	2	2	0	0	0	0	0	0	6	2	2	4	2	14	0	2	2	6	0	4	4	0	0	0
ENSMUSG00000078201	191	128	313	317	99	144	126	87	182	62	538	360	199	152	52	100	111	448	75	250	64	121	172	164	68	202	221	116
ENSMUSG00000078186	0	0	0	0	0	0	0	0	0	0	0	0	0	0	0	0	0	0	0	0	0	0	0	0	0	0	0	0
ENSMUSG00000078184	659	1022	1183	991	659	985	817	390	1332	758	2534	1487	965	1334	384	513	831	1553	391	1169	567	838	1284	1259	1426	1148	1047	648
ENSMUSG00000078179	0	0	0	0	0	0	0	2	0	0	0	0	0	0	0	0	0	0	0	0	0	0	0	0	0	0	0	0
ENSMUSG00000078173	0	0	0	0	0	0	0	0	0	0	0	0	0	0	0	0	0	42	2	16	8	0	0	6	4	6	9	4
ENSMUSG00000078161	0	0	0	0	0	0	0	0	0	0	0	0	0	0	0	0	0	0	0	0	0	8	0	0	2	0	0	0
ENSMUSG00000078160	0	0	0	0	0	0	0	0	0	0	0	0	0	0	0	0	0	0	0	0	0	0	0	0	0	0	0	0
ENSMUSG00000078157	1269	534	587	667	1753	1999	447	190	2807	269	1836	1675	915	1238	237	207	308	587	517	1219	699	937	880	1422	974	2132	1352	633
ENSMUSG00000078154	366	625	1393	1239	1120	1679	442	351	3095	565	2099	1356	933	753	300	336	624	1108	560	669	736	1025	898	1107	1129	1951	898	525
ENSMUSG00000078144	0	14	203	806	15	6	0	0	0	0	0	0	0	0	0	0	0	0	6	960	0	0	0	0	0	4	0	2
ENSMUSG00000078139	223	389	148	169	854	2163	1040	641	298	433	1150	564	363	350	188	340	592	671	351	521	183	295	339	334	354	624	437	318
ENSMUSG00000078137	0	2	0	0	0	2	0	0	2	0	6	4	2	0	2	2	0	0	125	0	2	0	0	0	2	4	0	6
ENSMUSG00000078132	0	0	0	0	0	2	0	0	0	0	0	0	0	4	14	0	0	0	0	0	0	2	0	0	0	0	0	0
ENSMUSG00000078129	0	4	4	4	0	0	0	2	0	8	0	0	2	8	4	16	30	12	12	4	2	2	2	2	2	0	6	4
ENSMUSG00000078128	7698	9227	9620	8166	10601	20613	5192	3118	14671	10976	19757	13942	8123	7498	2300	3687	9237	19092	6210	12539	12391	13720	9832	11362	20264	21472	11047	13300
ENSMUSG00000078127	0	0	0	0	0	0	0	0	0	0	0	0	0	0	0	0	0	2	0	0	0	0	0	0	0	0	0	0
ENSMUSG00000078117	0	0	0	0	0	0	0	0	0	0	0	0	0	0	0	0	0	0	0	0	0	2	0	2	0	0	0	0
ENSMUSG00000078091	0	0	0	0	0	0	0	0	0	0	0	0	0	0	0	0	0	0	0	0	0	0	0	0	0	0	0	0
ENSMUSG00000077450	1031	1466	316	571	1211	2567	1193	630	2378	671	4104	3579	1243	1002	444	844	1472	2432	1452	1584	870	2228	2114	2560	1621	2379	2436	1408
ENSMUSG00000076464	0	0	0	0	0	0	0	0	0	0	0	0	0	0	0	0	0	0	0	0	0	0	0	0	0	0	0	0
ENSMUSG00000076441	98	306	1779	2545	163	204	14	30	62	20	120	56	97	150	90	157	372	4	740	130	4	84	101	102	1062	57	24	52
ENSMUSG00000076439	0	0	9	0	0	2	0	0	9	0	0	0	2	0	0	0	0	2	0	0	0	2	0	0	0	0	0	2
ENSMUSG00000076438	0	0	0	0	0	4	6	4	0	0	0	0	0	0	0	0	2	0	4	0	6	4	2	4	2	4	0	2
ENSMUSG00000076435	197	145	807	795	557	347	3001	707	716	306	1873	1248	702	1880	744	3749	7551	1840	1984	595	820	266	150	219	144	310	296	48
ENSMUSG00000076434	0	0	0	2	4	6	52	24	6	0	144	100	50	4	4	22	35	0	97	4	2	2	2	0	1	8	0	2
ENSMUSG00000076433	0	1	0	0	30	72	6	2	85	10	10	4	0	0	0	0	0	154	16	6	4	12	10	0	16	24	10	24
ENSMUSG00000076432	1482	3177	3189	3390	2322	3700	1207	794	1449	554	3412	1932	1797	1439	569	1268	1555	2555	1877	3089	2232	5269	3433	3436	4378	5066	3505	1961
ENSMUSG00000076430	0	0	0	0	0	0	0	0	0	0	2	0	0	0	0	0	0	0	0	6	2	12	8	6	10	4	11	4
ENSMUSG00000075610	0	0	0	0	0	0	0	0	0	4	14	10	4	0	0	0	10	2	0	2	8	0	0	0	0	0	0	0
ENSMUSG00000075605	0	0	0	0	0	0	0	0	0	0	2	6	2	0	0	0	0	0	0	0	0	0	0	0	2	0	0	0
ENSMUSG00000075596	0	0	0	0	0	0	0	0	0	0	0	0	0	0	0	0	0	0	0	0	0	0	0	0	0	0	0	0
ENSMUSG00000075593	2856	458	94	169	173	272	0	0	176	31	1017	659	214	380	147	260	274	110	283	88	4	130	48	49	171	96	75	112
ENSMUSG00000075592	66	48	98	79	1696	938	304	147	469	26	514	506	138	228	144	92	195	2639	46	318	42	1452	3675	5155	1249	2455	7033	1421
ENSMUSG00000075590	100	759	339	764	74	76	258	68	268	997	3644	2501	957	678	278	402	535	999	1004	222	173	115	223	244	168	1017	347	331
ENSMUSG00000075574	0	0	0	0	0	0	0	0	0	0	0	0	0	0	0	0	0	0	0	0	0	0	0	0	0	0	0	0
ENSMUSG00000075573	0	0	0	0	0	0	0	0	0	0	0	0	0	0	0	0	0	0	0	0	0	0	0	0	0	0	0	0
ENSMUSG00000075572	0	0	0	0	0	0	0	0	0	0	0	0	0	0	0	0	0	0	0	0	0	0	0	0	0	0	0	0
ENSMUSG00000075571	0	0	0	0	0	0	0	0	0	0	0	0	0	0	0	0	0	0	0	0	0	0	0	0	0	0	0	0
ENSMUSG00000075569	2	20	0	2	0	0	38	14	6	6	12	7	0	14	6	0	0	8	12	6	0	8	0	0	6	6	6	0
ENSMUSG00000075553	0	0	2	0	2	0	0	2	0	0	0	0	0	0	0	0	0	0	0	2	0	0	2	0	0	0	0	0
ENSMUSG00000075549	0	0	0	0	0	0	0	0	0	0	0	0	0	0	0	0	0	0	0	0	2	0	0	0	0	0	0	0
ENSMUSG00000075543	0	0	0	0	0	0	0	0	0	0	0	0	0	0	0	0	0	0	0	0	0	0	0	0	0	0	0	0
ENSMUSG00000075528	840	568	1104	772	2328	3872	1156	841	1257	483	2117	1402	883	856	328	722	1285	1586	740	1257	433	1102	924	1212	951	1589	883	670
ENSMUSG00000075524	0	0	0	0	2	2	2	0	0	0	0	0	0	0	0	0	0	8	0	0	0	0	0	0	2	0	0	0
ENSMUSG00000075520	0	0	0	0	0	0	0	0	2	2	2	0	0	0	0	0	0	0	8	2	0	2	0	2	2	2	0	0
ENSMUSG00000075512	0	0	0	0	0	0	0	0	0	0	0	0	0	0	0	0	0	0	0	0	0	0	0	0	0	0	0	0
ENSMUSG00000075510	0	16	10	10	2	6	0	0	30	0	20	6	4	0	0	0	0	0	0	0	4	0	0	0	0	0	0	0
ENSMUSG00000075486	133	232	90	100	129	313	69	72	254	478	477	356	131	238	90	63	135	260	118	276	145	187	202	211	241	218	197	146
ENSMUSG00000075478	0	0	0	0	2	0	0	0	0	0	0	0	0	0	0	0	0	0	0	0	0	0	0	0	0	0	0	0
ENSMUSG00000075470	92	196	160	227	18	20	30	16	80	14	16	8	28	36	6	52	65	226	77	28	65	98	64	62	56	56	92	55
ENSMUSG00000075467	733	219	226	172	174	270	130	84	402	153	1188	1009	409	432	113	70	150	1911	14	1519	232	373	369	492	434	839	496	389
ENSMUSG00000075465	0	0	0	0	0	0	0	0	0	0	0	0	0	0	0	0	0	0	0	0	0	2	0	0	0	0	0	0
ENSMUSG00000075420	0	0	0	0	0	0	0	0	0	0	4	0	0	0	0	0	0	0	0	0	0	0	0	0	0	0	0	0
ENSMUSG00000075419	2089	1062	819	762	358	408	472	313	1358	425	2171	1908	1100	859	306	522	688	1486	311	701	504	963	620	854	853	1032	941	658
ENSMUSG00000075415	1238	1242	1070	981	603	896	631	248	287	336	9383	6984	2193	436	82	822	785	1288	305	461	1252	1205	1893	1714	968	556	812	1007
ENSMUSG00000075410	0	0	0	0	0	0	0	0	0	0	0	0	0	0	0	0	0	0	0	0	0	0	0	0	0	0	0	2
ENSMUSG00000075405	0	0	0	0	0	0	0	0	0	0	0	0	0	0	0	0	0	0	0	0	0	0	0	0	2	0	0	0
ENSMUSG00000075394	14	115	70	126	127	229	288	167	192	55	303	182	32	42	25	43	96	382	64	169	149	53	143	197	106	103	97	137
ENSMUSG00000075384	0	0	0	0	0	0	0	0	0	0	4	2	0	2	2	0	0	0	0	0	0	0	0	0	0	0	0	0
ENSMUSG00000075380	0	0	0	0	0	0	0	0	0	0	0	0	0	0	0	0	0	0	0	0	0	2	0	0	0	0	0	0
ENSMUSG00000075377	0	0	0	0	0	0	0	0	0	0	0	2	0	0	0	0	0	0	0	0	0	0	0	0	0	0	0	0
ENSMUSG00000075376	280	602	180	349	282	270	272	88	172	118	351	166	356	277	162	236	148	363	204	138	296	541	356	137	154	310	615	150
ENSMUSG00000075370	0	0	0	0	0	0	0	0	0	0	0	0	0	0	0	0	0	0	0	0	0	0	0	0	0	0	0	0
ENSMUSG00000075334	369	1	0	0	2	14	0	0	2	0	0	0	0	0	0	0	0	0	4	6	0	0	2	2	0	10	12	0
ENSMUSG00000075330	0	0	0	0	0	0	0	0	0	0	0	0	0	0	0	0	0	0	0	0	0	0	0	0	0	0	0	2
ENSMUSG00000075327	69	322	200	218	204	186	89	57	234	82	260	189	104	74	24	75	95	132	142	113	140	249	174	161	198	265	239	163
ENSMUSG00000075324	12	74	50	50	24	56	48	16	0	14	34	12	12	82	34	22	14	36	57	4	10	4	8	4	14	2	48	24
ENSMUSG00000075307	10	10	18	40	2	4	29	22	2	0	38	30	0	2	0	0	0	22	2	2	2	10	0	4	104	14	8	2
ENSMUSG00000075304	0	10	2	4	44	340	0	0	2	0	4	2	2	1	0	145	148	64	0	1	0	6	0	0	0	0	0	2
ENSMUSG00000075302	0	24	12	2	2	4	0	2	0	0	374	256	50	46	14	2	6	370	0	575	0	0	0	2	2	0	16	2
ENSMUSG00000075297	0	0	0	0	0	0	0	0	0	0	0	0	0	0	0	0	0	0	0	0	0	0	0	0	0	0	0	0
ENSMUSG00000075286	0	0	0	0	0	0	0	0	0	0	0	0	0	0	0	0	0	398	0	0	0	0	0	0	0	0	0	0
ENSMUSG00000075284	654	439	379	337	237	154	159	54	192	124	1100	557	355	312	119	694	636	383	467	1013	367	704	571	483	456	377	1310	575
ENSMUSG00000075270	0	0	0	0	0	0	0	0	0	0	2	2	4	0	0	0	0	0	2	0	12	4	0	0	2	4	0	24
ENSMUSG00000075269	0	0	0	0	0	0	0	0	0	0	0	0	0	0	0	0	0	0	0	0	0	0	0	0	0	0	0	0
ENSMUSG00000075267	0	4	2	2	10	12	100	14	20	18	6	4	0	0	0	17	31	4	28	107	11	24	28	40	48	46	22	14
ENSMUSG00000075266	2	60	233	176	28	114	38	32	201	16	126	94	62	265	8	84	176	55	6	26	22	91	23	26	134	76	23	20
ENSMUSG00000075256	0	2	2	1	142	485	0	0	2	0	0	0	0	6	2	0	2	34	0	0	4	6	0	0	6	0	2	2
ENSMUSG00000075254	31	136	96	160	281	132	532	222	220	82	1117	498	559	200	91	423	169	2186	330	434	291	1134	267	271	456	404	595	753
ENSMUSG00000075249	0	0	0	0	0	0	2	0	2	0	12	6	0	0	0	0	0	6	14	0	0	0	2	0	0	0	58	0
ENSMUSG00000075232	493	541	506	475	564	444	299	104	436	161	188	95	180	460	214	238	202	513	1152	467	325	544	896	852	824	676	848	451
ENSMUSG00000075229	72	241	251	282	174	320	223	157	470	216	791	623	225	125	45	58	132	458	108	286	246	333	366	415	545	473	421	190
ENSMUSG00000075227	408	740	734	666	204	420	210	128	529	44	564	402	246	219	67	174	341	895	234	1259	333	426	564	1023	514	660	701	228
ENSMUSG00000075225	2	0	0	4	0	2	30	32	0	3	0	0	0	2	4	0	0	0	4	0	0	0	0	0	2	2	16	4
ENSMUSG00000075224	0	0	0	0	0	0	0	0	0	0	0	0	0	0	2	2	0	0	0	0	0	0	0	0	0	0	0	0
ENSMUSG00000075223	0	0	0	0	0	0	0	0	0	0	0	0	0	0	2	0	0	0	0	0	0	0	0	0	0	0	0	0
ENSMUSG00000075221	0	0	0	0	0	0	0	0	0	0	2	0	0	0	0	2	0	0	0	0	0	0	0	0	0	0	0	2
ENSMUSG00000075217	0	6	0	0	0	0	0	0	0	0	0	0	0	0	0	0	0	0	0	0	0	0	0	0	0	0	0	2
ENSMUSG00000075214	0	0	0	0	0	0	0	0	0	0	0	0	0	0	0	0	0	0	0	0	0	0	0	0	0	0	0	0
ENSMUSG00000075211	0	0	0	0	0	0	0	0	0	0	0	0	0	0	0	0	0	0	0	0	0	0	0	0	0	0	0	0
ENSMUSG00000075206	0	0	0	0	0	0	0	0	0	0	0	0	0	0	0	0	0	0	0	0	0	0	0	0	0	0	0	0
ENSMUSG00000075201	0	0	0	0	0	0	0	0	0	0	0	2	0	0	0	0	0	0	0	0	0	0	0	0	0	0	0	0
ENSMUSG00000075184	0	0	0	0	0	0	0	0	0	0	0	0	0	0	0	0	0	0	0	0	0	0	0	0	0	0	0	0
ENSMUSG00000075167	0	0	0	0	0	0	0	0	0	0	0	0	0	0	0	0	0	0	0	0	0	0	0	0	0	0	0	0
ENSMUSG00000075166	0	0	0	0	0	0	0	2	0	0	0	0	0	0	0	0	0	0	0	0	0	0	0	0	0	0	0	0
ENSMUSG00000075165	0	0	0	0	0	0	0	0	0	0	0	0	0	0	0	0	0	0	0	0	0	0	0	0	0	0	0	0
ENSMUSG00000075164	0	0	0	0	0	0	0	0	0	0	0	0	0	0	0	0	0	0	0	0	0	0	0	0	0	0	0	0
ENSMUSG00000075158	0	0	0	0	0	0	0	0	0	0	0	0	0	0	0	0	0	0	0	0	0	0	2	0	0	0	0	0
ENSMUSG00000075148	0	0	0	0	0	0	0	0	0	0	0	0	0	0	0	0	0	0	0	0	0	0	0	0	0	0	0	0
ENSMUSG00000075143	0	2	0	0	0	0	0	0	0	0	0	0	0	0	0	0	0	0	0	0	0	0	0	0	0	0	0	0
ENSMUSG00000075126	0	0	0	0	0	0	0	0	0	0	0	0	0	0	0	0	0	0	0	0	0	0	0	0	0	0	0	0
ENSMUSG00000075122	0	0	0	5	4	2	16	8	0	2	10	12	4	2	0	0	0	10	0	0	0	0	0	0	0	4	0	0
ENSMUSG00000075114	0	0	0	0	0	0	0	0	0	0	0	0	0	0	0	0	0	0	0	0	0	0	0	0	0	0	0	0
ENSMUSG00000075094	0	0	0	0	0	0	0	0	0	0	0	0	0	0	0	0	0	0	0	0	0	0	0	0	0	0	0	0
ENSMUSG00000075093	0	0	0	0	0	0	0	0	0	0	0	0	0	0	0	0	0	0	10	0	0	0	0	0	0	0	0	0
ENSMUSG00000075088	0	0	0	0	0	0	0	0	0	0	0	0	0	0	2	0	0	0	0	0	0	0	0	0	0	0	0	0
ENSMUSG00000075054	151	237	98	203	126	202	230	121	96	90	142	78	50	62	22	110	82	242	63	204	72	84	78	94	92	118	122	45
ENSMUSG00000075040	4	612	370	475	35	46	297	136	108	153	1268	956	256	311	126	234	496	519	153	90	345	382	612	889	414	540	883	496
ENSMUSG00000075033	122	50	50	27	88	96	229	93	260	65	138	58	52	82	44	146	181	274	34	110	86	58	42	24	66	38	24	12
ENSMUSG00000075028	14	9	23	42	20	58	10	6	22	62	584	570	281	247	34	26	34	14	12	28	26	38	30	49	22	42	44	19
ENSMUSG00000075024	0	0	0	0	0	0	0	0	0	0	0	0	0	0	0	0	0	0	0	0	0	0	0	0	0	0	0	0
ENSMUSG00000075023	0	10	4	2	0	0	0	0	4	0	8	0	2	0	0	0	0	2	0	2	0	0	0	0	0	0	0	0
ENSMUSG00000075012	66	177	239	307	393	324	121	88	124	43	1047	777	972	939	386	335	933	293	706	242	122	32	62	80	60	386	18	67
ENSMUSG00000075010	0	0	0	0	0	0	0	0	0	0	0	0	0	0	0	0	0	0	0	0	0	0	0	0	0	0	0	0
ENSMUSG00000075002	0	0	0	0	0	0	0	0	0	0	0	0	0	0	0	0	0	0	4	0	0	0	0	0	0	0	0	0
ENSMUSG00000075000	206	290	233	200	264	457	1184	487	248	144	856	455	265	250	127	364	514	554	157	359	280	362	290	304	332	391	369	290
ENSMUSG00000074999	0	0	0	0	0	0	0	0	0	0	0	0	0	0	0	0	0	0	0	0	0	0	0	0	0	0	0	0
ENSMUSG00000074996	0	0	0	0	0	0	0	0	0	0	0	0	0	0	0	0	0	0	0	0	0	0	0	0	0	0	0	0
ENSMUSG00000074994	230	852	262	395	180	146	250	60	292	88	208	104	99	150	36	54	54	160	113	233	309	628	448	298	438	412	651	186
ENSMUSG00000074991	0	0	0	0	0	0	0	0	0	2	0	0	0	0	0	0	0	0	0	0	0	0	0	0	0	0	0	0
ENSMUSG00000074971	1653	56	0	4	117	92	70	10	26	93	230	123	72	20	6	44	210	68	407	54	54	16	308	339	88	16	250	52
ENSMUSG00000074968	47	0	0	0	0	0	0	0	0	12	0	0	0	0	0	0	11	14	4	0	2	0	0	0	0	0	0	0
ENSMUSG00000074965	0	0	0	0	0	0	0	0	0	0	2	0	0	0	0	0	0	0	0	0	2	0	0	0	0	0	0	0
ENSMUSG00000074955	0	0	0	0	0	0	0	0	0	0	0	0	0	0	0	0	0	0	0	0	0	0	0	0	0	0	0	0
ENSMUSG00000074951	0	0	0	0	0	0	0	0	0	0	0	0	0	0	0	0	0	0	0	0	0	0	0	0	0	0	0	0
ENSMUSG00000074939	2	0	0	0	0	0	2	0	0	2	127	72	50	57	28	0	0	0	2	0	0	0	0	0	0	0	0	0
ENSMUSG00000074934	150	11564	78	424	1943	1225	1119	72	6	352	140	84	11	8	7	96	66	3421	132	1262	636	186	20	12	223	42	36	123
ENSMUSG00000074928	0	0	0	0	0	0	2	0	0	0	0	0	0	0	0	0	0	0	0	0	0	0	0	0	0	0	0	0
ENSMUSG00000074925	14	92	37	102	68	70	72	45	39	24	132	50	91	42	14	66	89	152	24	56	64	92	47	28	26	78	85	26
ENSMUSG00000074923	232	30	52	42	8	6	107	57	18	90	234	215	143	428	118	4	6	6	35	308	6	291	118	194	150	245	80	90
ENSMUSG00000074922	110	130	136	151	91	54	118	36	146	59	411	221	193	147	31	42	88	479	153	261	124	229	206	219	244	276	277	177
ENSMUSG00000074919	0	0	0	0	0	0	0	0	0	0	0	0	0	0	0	0	0	0	0	0	0	0	0	0	0	0	0	0
ENSMUSG00000074916	1692	481	868	935	916	1045	1223	577	992	460	5304	4280	1454	1353	547	176	435	951	296	681	407	667	320	547	420	952	516	619
ENSMUSG00000074913	0	0	0	0	0	0	0	0	0	0	0	0	0	0	0	0	0	0	0	0	0	0	0	0	0	0	0	0
ENSMUSG00000074909	122	141	260	282	266	262	308	144	276	68	402	178	178	124	88	275	274	302	220	158	184	197	269	222	189	142	311	133
ENSMUSG00000074896	21	1043	284	116	2	0	2444	633	10	8	182	130	441	114	250	31	14	409	4	38	6	38	2	2	54	16	12	38
ENSMUSG00000074895	0	0	0	0	0	0	0	0	0	0	10	12	2	0	2	0	0	0	0	0	0	0	0	0	0	0	0	0
ENSMUSG00000074892	0	0	0	0	2	0	0	0	0	0	0	0	0	0	0	0	0	0	0	0	0	0	0	0	0	0	0	0
ENSMUSG00000074890	62	313	82	188	140	156	194	126	98	32	220	138	148	147	50	62	93	440	138	178	120	335	295	297	262	288	406	173
ENSMUSG00000074886	586	635	860	891	911	801	130	60	426	255	1204	894	671	701	154	500	586	1281	569	1028	551	1949	865	992	1291	1200	950	726
ENSMUSG00000074884	3803	1470	3336	4281	2217	6964	5209	2589	11814	7151	41580	30437	13376	6952	3174	2804	7028	19972	6598	10668	8459	2931	2349	3686	2157	4114	2646	2455
ENSMUSG00000074873	0	12	8	4	2	2	0	2	2	6	4	4	2	2	2	6	12	46	12	4	14	18	30	32	26	16	16	16
ENSMUSG00000074872	0	0	0	0	0	0	0	0	0	0	0	0	0	0	0	0	0	0	0	0	0	0	0	0	0	0	0	0
ENSMUSG00000074862	0	0	0	0	0	0	0	0	0	0	0	0	0	0	0	0	0	0	0	0	14	4	12	16	6	10	18	13
ENSMUSG00000074852	6	0	0	4	0	2	0	0	0	0	0	0	0	0	0	0	0	0	0	0	0	0	0	0	0	0	2	2
ENSMUSG00000074849	0	0	0	0	0	0	0	0	0	0	0	0	0	0	0	2	0	0	0	0	0	0	0	0	0	0	0	0
ENSMUSG00000074847	0	0	0	0	0	0	0	0	0	0	0	0	0	0	0	0	0	0	0	0	0	0	0	0	0	0	0	0
ENSMUSG00000074825	88	158	227	345	88	118	138	69	210	44	250	234	191	308	83	56	54	98	70	64	258	218	124	154	185	162	116	36
ENSMUSG00000074818	8	6	61	80	44	50	80	32	108	18	140	106	16	0	0	0	0	26	14	4	10	32	58	74	99	82	66	60
ENSMUSG00000074812	0	0	0	0	0	0	0	0	0	0	0	0	0	0	0	0	0	4	6	0	0	0	0	0	0	0	0	0
ENSMUSG00000074811	241	549	307	373	717	1361	611	413	432	258	1389	1156	703	593	201	123	209	957	487	482	632	592	731	1346	514	881	916	379
ENSMUSG00000074807	0	0	0	0	0	2	0	2	0	0	0	0	0	0	0	2	0	12	0	0	6	6	2	0	0	0	0	2
ENSMUSG00000074802	4	10	104	210	10	8	0	0	10	8	58	32	34	106	8	18	18	6	16	14	2	150	18	6	74	34	22	6
ENSMUSG00000074797	439	837	855	832	283	379	692	390	290	247	775	511	318	285	64	166	332	282	254	303	258	409	458	542	433	704	749	453
ENSMUSG00000074796	0	2	12	16	54	32	156	50	26	44	38	30	65	454	224	54	85	16	74	20	24	82	6	12	56	26	14	6
ENSMUSG00000074794	485	636	91	112	1341	1067	1835	436	940	94	46	34	24	48	68	70	91	184	223	86	463	83	183	153	106	118	224	176
ENSMUSG00000074793	0	12	46	278	4	2	715	324	50	44	56	55	16	44	0	8	32	66	42	194	68	364	84	96	216	1288	270	58
ENSMUSG00000074785	78	6	14	48	87	30	99	12	10	40	2054	1090	551	151	44	468	209	8	8	32	2	46	112	66	60	36	32	12
ENSMUSG00000074781	477	628	487	601	756	1512	305	160	791	238	948	603	453	417	201	302	417	960	506	555	426	544	563	446	966	789	569	474
ENSMUSG00000074776	0	0	0	0	0	0	0	0	0	0	0	0	0	0	0	0	0	0	0	0	0	0	0	0	0	0	0	0
ENSMUSG00000074771	0	0	0	0	0	0	0	0	0	0	0	0	0	0	0	0	0	0	2	0	0	0	0	0	0	2	0	0
ENSMUSG00000074766	1970	64	84	22	8	14	122	2	0	2	14	10	0	271	124	358	975	2360	14	109	0	807	2415	2294	982	2336	2176	1379
ENSMUSG00000074764	0	0	0	0	0	0	2	0	0	0	0	0	0	0	0	0	0	0	0	0	0	0	0	0	0	0	0	0
ENSMUSG00000074754	0	64	38	30	0	0	0	0	0	0	0	0	0	0	0	0	0	450	116	2	28	99	96	88	125	136	118	80
ENSMUSG00000074749	60	95	92	89	80	98	110	20	69	105	382	228	148	193	66	104	204	368	163	248	494	534	559	498	512	578	422	571
ENSMUSG00000074746	139	643	269	457	253	148	228	62	262	113	718	324	381	394	229	234	192	470	285	140	403	456	492	269	340	372	468	172
ENSMUSG00000074743	1026	544	249	1256	192	62	0	8	873	174	102	46	28	252	98	66	174	723	124	216	26	885	71	69	960	185	62	3764
ENSMUSG00000074738	45	100	86	105	430	782	25	36	409	24	204	167	61	107	23	25	102	122	12	154	10	296	32	58	116	274	56	70
ENSMUSG00000074736	0	12	0	0	14	16	0	6	52	4	90	52	14	2	0	28	18	4	0	129	0	28	0	0	6	0	0	46
ENSMUSG00000074715	0	0	0	0	0	0	0	0	0	0	0	0	0	0	0	0	2	0	0	0	0	0	0	0	0	0	0	0
ENSMUSG00000074704	0	0	2	0	0	0	0	0	0	0	0	0	0	0	0	2	4	0	10	0	2	12	0	2	22	42	0	28
ENSMUSG00000074682	32	58	105	102	10	11	20	4	28	42	226	166	50	96	26	63	109	128	51	36	52	98	81	94	69	124	54	47
ENSMUSG00000074681	0	0	0	0	0	0	0	0	0	0	0	0	0	0	0	0	0	0	0	0	0	0	0	0	0	0	0	0
ENSMUSG00000074680	0	0	0	0	0	0	0	0	0	0	0	0	0	0	0	0	0	0	0	0	0	0	0	0	0	2	0	0
ENSMUSG00000074679	0	0	0	0	0	0	0	0	0	0	0	0	0	0	0	0	0	0	2	0	0	2	0	0	2	6	0	2
ENSMUSG00000074678	0	0	0	0	0	0	2	0	0	0	18	4	2	0	0	0	0	0	0	0	0	0	0	0	4	0	0	0
ENSMUSG00000074676	24	86	1326	672	239	634	618	133	80	18	72	48	1249	41	8	193	768	258	193	1320	12	108	8	14	77	16	16	28
ENSMUSG00000074673	2	0	0	0	2	0	4	2	2	0	0	0	0	0	0	0	0	2	0	0	0	0	2	2	0	0	0	0
ENSMUSG00000074671	0	0	0	0	0	0	2	0	0	0	106	130	44	70	10	8	24	0	83	0	0	0	0	0	0	0	0	0
ENSMUSG00000074665	0	0	0	0	0	0	8	0	6	0	2	2	4	2	0	0	2	0	0	0	138	12334	552	800	1267	700	38	777
ENSMUSG00000074657	156	12	6	8	189	252	120	18	2	23	96	32	36	103	40	64	64	24	50	30	111	46	61	48	16	84	403	18
ENSMUSG00000074656	1342	2054	1805	1505	2052	3407	1145	883	2751	1458	4069	2604	1866	2057	861	1275	2063	5870	1237	3856	2556	2748	1815	1864	4504	4633	1809	1824
ENSMUSG00000074655	0	0	0	0	0	0	0	0	0	0	0	0	0	0	0	0	0	10	0	0	0	0	0	0	0	0	0	0
ENSMUSG00000074653	0	0	0	0	0	0	0	0	0	0	6	2	4	0	0	0	0	0	0	0	10	0	0	0	0	6	0	0
ENSMUSG00000074651	0	0	0	0	0	0	0	0	2	0	0	0	0	0	0	0	0	0	0	0	0	0	0	0	2	2	0	0
ENSMUSG00000074650	2	4	0	0	0	0	0	0	0	0	0	0	0	0	0	0	0	0	0	0	0	0	0	0	4	12	20	2
ENSMUSG00000074647	0	0	2	0	0	2	12	8	2	0	0	0	0	0	0	12	8	0	0	2	10	6	6	6	8	10	2	0
ENSMUSG00000074646	0	0	0	0	0	0	0	0	2	0	0	0	0	0	0	0	0	42	0	0	2	0	0	0	0	0	0	0
ENSMUSG00000074643	2178	4046	3348	4116	1103	1652	1144	478	648	1580	8983	6703	3659	3672	1470	1269	2470	1565	313	453	549	729	585	447	658	702	739	500
ENSMUSG00000074635	0	0	0	0	0	0	0	0	0	0	0	0	0	0	0	0	0	0	0	0	0	0	2	0	0	0	0	0
ENSMUSG00000074629	0	2	0	0	0	0	0	0	0	0	0	0	0	2	0	0	0	0	0	0	0	0	0	0	2	0	0	0
ENSMUSG00000074628	0	0	0	0	0	4	4	0	4	0	4	0	0	0	0	0	0	2	0	0	0	2	0	0	0	0	0	0
ENSMUSG00000074627	20	27	44	26	17	32	12	6	68	6	68	34	33	8	2	12	8	239	25	12	67	36	58	54	39	74	57	36
ENSMUSG00000074625	36	8	2	0	0	2	0	0	0	0	0	0	0	0	0	0	0	0	0	0	0	0	0	0	0	2	4	0
ENSMUSG00000074623	0	0	0	0	0	0	0	0	0	0	0	0	0	0	0	0	0	0	0	0	0	0	0	0	0	0	0	0
ENSMUSG00000074622	922	48	32	17	421	589	26	64	24	68	264	168	114	280	178	61	34	254	286	274	331	34	102	109	36	148	178	138
ENSMUSG00000074619	348	211	244	285	185	187	204	128	580	120	460	292	179	181	97	189	203	149	445	342	195	266	300	218	363	356	325	304
ENSMUSG00000074607	0	0	0	0	0	2	4	0	2	6	0	0	0	40	16	0	0	0	10	0	0	0	0	0	0	0	2	0
ENSMUSG00000074604	0	12	218	240	220	340	1223	622	315	0	0	0	0	0	0	131	281	0	434	193	0	636	6	6	425	289	18	257
ENSMUSG00000074596	0	0	0	0	0	0	0	0	0	0	0	0	0	0	0	0	0	0	0	0	0	0	0	0	0	0	0	0
ENSMUSG00000074594	0	0	0	0	0	0	0	0	0	0	0	0	0	0	0	0	0	0	0	0	0	0	0	0	0	0	0	0
ENSMUSG00000074593	0	0	0	0	0	0	0	0	0	0	0	0	0	0	0	0	0	0	0	0	0	0	0	0	0	0	0	0
ENSMUSG00000074592	0	2	0	0	0	0	0	0	0	2	0	0	0	0	0	0	0	0	0	0	4	0	0	0	2	0	2	0
ENSMUSG00000074591	0	0	0	0	0	0	0	0	0	2	0	0	0	0	0	0	0	0	0	0	0	0	0	0	0	0	0	0
ENSMUSG00000074582	698	1597	549	746	645	416	309	92	380	397	999	541	696	580	245	651	516	1668	408	1004	877	878	689	494	340	788	1073	594
ENSMUSG00000074579	0	0	0	0	6	2	0	0	10	2	6	10	6	0	0	0	2	32	6	0	0	0	2	0	0	2	2	0
ENSMUSG00000074578	0	0	0	0	0	0	0	0	0	0	0	0	0	0	0	0	0	521	0	0	0	0	0	0	0	0	0	0
ENSMUSG00000074577	63	26	50	74	99	104	2	14	378	58	401	255	108	327	30	6	16	1727	282	51	2	10	16	30	12	22	42	14
ENSMUSG00000074576	160	274	230	185	160	220	241	112	144	65	623	378	323	218	68	124	197	330	182	349	176	398	350	632	418	580	531	254
ENSMUSG00000074575	0	0	0	2	235	399	204	93	1078	2	2	2	6	63	14	20	12	14	0	0	2	2	0	0	2	0	0	2
ENSMUSG00000074570	0	2	0	0	0	0	0	0	0	0	0	0	0	0	0	2	0	32	0	0	0	0	0	0	0	0	0	0
ENSMUSG00000074569	0	2	6	2	0	2	2	0	0	4	0	0	4	0	0	0	0	0	4	2	8	2	2	4	4	16	10	0
ENSMUSG00000074513	562	466	233	225	178	78	164	61	150	105	498	268	169	153	100	193	240	938	185	376	390	384	382	368	416	547	511	277
ENSMUSG00000074502	0	0	0	0	2	0	0	0	0	0	0	0	0	0	0	0	0	0	0	0	0	2	0	0	0	2	0	0
ENSMUSG00000074497	0	0	0	0	0	0	0	0	0	0	0	0	0	0	0	0	0	2	0	0	0	0	0	0	0	0	0	0
ENSMUSG00000074491	0	20	2	2	2	4	0	0	0	0	0	0	0	0	0	0	0	0	0	0	0	0	0	0	0	0	0	0
ENSMUSG00000074480	8	72	50	91	28	8	10	6	86	24	82	44	34	82	28	143	125	114	109	46	58	200	215	274	112	236	344	66
ENSMUSG00000074476	96	51	751	593	321	331	56	69	417	8	170	148	85	617	40	158	218	338	178	241	167	976	173	229	1045	676	199	285
ENSMUSG00000074473	0	0	0	0	0	0	0	0	0	0	0	0	0	0	0	0	0	0	0	0	0	0	0	0	0	0	0	0
ENSMUSG00000074457	538	1136	742	498	376	650	323	150	3605	235	1844	1356	1178	919	225	127	315	2099	403	954	3	1052	1272	1531	1477	1592	1288	876
ENSMUSG00000074454	0	0	0	0	0	0	0	0	0	0	0	0	0	0	0	0	0	0	0	0	0	0	0	0	0	0	0	0
ENSMUSG00000074452	0	0	0	0	0	0	0	0	0	0	0	0	0	0	0	0	0	0	0	0	0	0	2	2	0	0	2	0
ENSMUSG00000074448	0	0	0	0	0	0	0	0	0	0	0	0	0	0	0	0	0	0	0	0	0	0	0	0	0	0	0	0
ENSMUSG00000074435	0	0	0	0	0	0	0	0	0	0	0	0	0	0	0	0	0	0	0	0	0	0	0	0	0	0	0	0
ENSMUSG00000074406	140	416	345	376	917	1222	302	188	1408	303	1200	1026	559	604	238	190	288	529	251	548	479	610	613	1134	502	1016	765	472
ENSMUSG00000074405	503	349	158	272	315	348	165	65	355	526	1983	1717	778	960	302	386	828	1440	441	618	425	970	803	1401	976	1378	1090	760
ENSMUSG00000074397	0	0	0	0	6	4	0	0	0	0	0	0	0	0	0	0	2	0	0	0	0	0	0	0	0	0	0	0
ENSMUSG00000074385	0	0	0	0	0	0	0	0	0	0	0	0	0	0	0	0	0	0	0	0	0	0	0	0	0	0	0	0
ENSMUSG00000074384	26	40	20	10	58	302	10	8	129	2	72	42	28	28	10	6	28	88	52	6	74	58	74	49	104	94	88	96
ENSMUSG00000074378	0	0	0	0	0	0	0	0	0	0	0	0	0	0	0	0	0	0	0	0	0	0	0	0	0	0	0	0
ENSMUSG00000074365	0	0	0	0	0	0	0	0	0	0	0	0	0	0	0	0	0	0	0	0	0	0	0	0	0	0	0	0
ENSMUSG00000074364	19291	10721	8268	12900	13506	20730	4260	2723	13728	4756	42903	38104	23376	10367	3470	6640	9977	14599	4811	13219	3691	11049	4246	5683	10752	10985	9650	4909
ENSMUSG00000074361	0	10	28	0	0	0	26	12	0	0	0	0	0	0	0	61	161	2	34	4	0	4	0	0	0	0	0	2
ENSMUSG00000074358	116	286	153	160	106	168	188	94	252	201	865	633	251	557	84	219	449	1184	121	220	160	545	401	587	539	570	670	391
ENSMUSG00000074345	8	224	45	34	72	140	10	12	169	14	379	228	71	16	6	24	28	0	64	2	2	105	55	56	152	20	35	16
ENSMUSG00000074344	0	0	0	0	0	0	0	0	0	2	0	0	0	2	0	0	0	4	0	0	0	0	0	0	0	0	0	0
ENSMUSG00000074342	0	0	2	2	4	6	0	0	0	0	0	0	0	0	0	0	0	0	0	0	0	0	0	0	0	0	0	0
ENSMUSG00000074340	0	0	2	2	0	0	0	2	24	0	0	2	0	0	0	0	0	2	78	2	12	2	38	40	4	4	2	6
ENSMUSG00000074336	0	0	0	0	0	0	0	0	0	0	0	0	0	0	0	0	0	0	0	0	0	0	0	0	0	0	0	0
ENSMUSG00000074305	203	617	86	405	1009	424	858	296	388	210	1437	642	1502	716	510	1062	636	686	900	641	1240	1439	1287	598	322	375	2932	463
ENSMUSG00000074269	0	10	0	4	0	0	0	4	0	6	128	94	29	14	6	0	0	8	0	0	0	0	0	0	0	0	0	0
ENSMUSG00000074261	0	0	8	0	0	0	4	0	4	0	0	0	0	0	2	0	0	8	0	0	0	0	0	0	0	0	0	0
ENSMUSG00000074259	0	0	0	0	0	4	8	6	2	0	126	92	67	64	22	0	4	46	11	76	4	126	10	18	22	222	6	60
ENSMUSG00000074252	0	0	0	0	0	0	0	0	0	0	0	0	0	0	0	0	0	0	0	0	0	0	0	0	0	0	0	0
ENSMUSG00000074248	0	0	0	0	0	0	0	0	0	0	0	0	0	0	0	0	0	0	0	0	0	0	0	0	0	0	0	0
ENSMUSG00000074247	262	563	303	438	538	1403	322	221	1029	306	717	757	504	585	191	226	472	1363	474	1158	412	1091	824	1171	1003	1633	892	737
ENSMUSG00000074240	2	0	0	0	2	4	0	0	2	0	0	0	0	0	0	0	0	0	0	2	0	0	2	0	0	0	0	0
ENSMUSG00000074238	173	198	157	206	264	204	110	39	56	30	180	82	62	104	42	189	186	522	181	268	297	196	189	191	177	152	214	138
ENSMUSG00000074237	0	0	0	0	0	0	0	0	0	0	0	0	0	0	0	0	0	0	0	2	0	0	0	0	0	0	0	0
ENSMUSG00000074232	0	0	0	0	0	0	0	0	0	0	0	0	0	0	0	0	0	0	0	0	0	0	0	0	0	0	0	0
ENSMUSG00000074228	0	0	0	0	0	0	0	2	0	0	0	0	0	0	0	0	0	4	4	0	6	17	0	7	8	34	8	12
ENSMUSG00000074227	0	93	268	186	2	0	225	46	621	1767	7008	5499	2635	821	389	103	174	302	6	8	96	10	60	75	28	500	91	229
ENSMUSG00000074224	0	12	0	0	2	2	18	16	30	0	4	0	0	0	0	13	16	0	0	0	0	2	4	0	4	0	12	0
ENSMUSG00000074221	204	4	20	65	44	50	48	24	10	18	74	18	82	48	22	34	40	16	30	8	60	216	110	48	50	108	157	49
ENSMUSG00000074220	245	98	64	44	183	258	150	118	30	18	74	68	54	32	2	100	134	64	183	116	156	183	230	200	250	92	202	136
ENSMUSG00000074219	0	22	78	128	36	56	0	1	0	11	27	24	4	14	13	34	36	50	2	24	20	44	20	18	18	36	28	21
ENSMUSG00000074218	110	283	554	446	5	28	62	11	2	4	208	128	60	14	6	519	1272	26	8	0	8	23	2	3	18	0	30	6
ENSMUSG00000074217	4	89	10	56	4	4	0	0	12	8	136	82	110	8	0	5	4	0	2	8	0	0	16	18	4	42	6	6
ENSMUSG00000074215	0	0	0	0	0	0	0	0	0	0	0	0	0	0	0	0	0	0	0	0	0	0	0	0	0	0	0	0
ENSMUSG00000074212	114	288	133	133	255	182	158	51	104	28	171	109	130	40	21	296	266	387	14	157	85	109	72	72	67	77	74	32
ENSMUSG00000074210	60	108	62	117	20	52	10	0	92	10	106	68	22	4	0	52	83	183	34	90	34	82	58	86	52	84	61	45
ENSMUSG00000074207	2	21	4	54	2	0	0	0	0	0	0	0	0	0	0	0	0	456	72	8	4	30	14	8	10	2	76	4
ENSMUSG00000074203	6	8	8	8	14	18	0	0	38	0	262	265	16	0	0	4	14	280	2	62	73	203	134	231	180	274	266	142
ENSMUSG00000074199	0	0	0	0	0	0	0	0	0	0	0	0	0	0	0	0	0	0	0	0	0	0	0	0	0	0	0	0
ENSMUSG00000074182	68	280	106	156	137	132	94	42	368	52	68	38	30	260	97	270	329	398	514	809	280	395	772	738	838	752	633	876
ENSMUSG00000074170	258	486	508	430	160	164	407	95	818	122	1024	818	180	330	116	227	676	542	388	545	529	790	687	834	616	962	925	1222
ENSMUSG00000074155	0	0	27	3315	0	0	0	0	0	0	0	0	0	0	0	0	0	0	0	0	0	0	0	0	0	0	0	0
ENSMUSG00000074151	0	199	2320	3320	18	8	152	6	0	8	22	18	8	4	2	22	48	10	6	2	0	16	4	8	28	12	52	34
ENSMUSG00000074141	18	276	84	105	49	104	160	135	148	38	757	579	240	866	197	36	53	16	42	4	28	116	62	73	90	66	74	40
ENSMUSG00000074139	0	0	0	0	0	0	2	0	0	0	0	0	0	0	0	0	0	0	0	0	0	0	0	0	0	0	0	0
ENSMUSG00000074123	0	0	0	0	0	0	0	0	0	0	0	0	0	0	0	0	0	0	0	0	0	0	0	0	0	0	0	0
ENSMUSG00000074121	0	8	11	10	19	61	16	6	24	0	2	2	6	2	0	0	0	68	22	0	16	14	2	6	10	42	6	24
ENSMUSG00000074109	0	0	0	0	0	0	0	0	0	0	0	0	0	0	0	0	0	0	0	0	0	0	0	0	0	0	0	0
ENSMUSG00000074102	537	1312	1147	1097	1188	1130	738	310	1264	697	2107	1651	1051	915	283	504	909	1080	417	740	637	1413	1336	1912	1234	1483	1771	691
ENSMUSG00000074093	0	8	6	74	0	0	0	0	0	0	0	0	0	0	0	6	2	0	2	2	4	0	0	0	0	0	2	0
ENSMUSG00000074088	347	427	614	493	401	484	422	183	806	200	478	274	304	527	158	303	520	430	218	364	365	630	427	495	757	390	549	283
ENSMUSG00000074064	308	420	230	199	291	429	609	302	462	284	650	546	412	224	58	134	313	727	498	436	471	593	798	1113	436	891	981	570
ENSMUSG00000074063	85	105	207	53	206	384	991	391	292	43	160	111	85	243	75	24	24	46	153	52	6	249	92	137	321	242	127	354
ENSMUSG00000074056	0	0	0	0	0	0	0	0	0	0	0	0	0	0	0	0	0	0	0	0	0	0	0	0	0	0	0	0
ENSMUSG00000074037	2	0	8	20	8	18	94	64	128	2	0	2	0	0	0	0	0	20	4	4	4	1	0	0	4	10	0	4
ENSMUSG00000074030	74	390	172	196	174	106	66	32	74	70	351	267	245	113	41	239	192	778	106	128	48	184	163	144	124	66	160	52
ENSMUSG00000074029	62	25	4	16	7	30	2	0	6	1	56	20	12	8	12	18	20	356	32	35	51	20	27	42	26	138	34	40
ENSMUSG00000074028	0	104	0	2	0	2	2	0	0	0	0	0	0	0	0	0	0	0	2	6	10	2	0	2	4	4	0	0
ENSMUSG00000074006	4	0	2	4	0	0	0	0	0	0	0	0	0	2	0	0	0	0	8	0	2	4	0	0	2	0	0	0
ENSMUSG00000074004	0	0	0	0	2	0	2	2	0	0	0	2	0	0	0	0	0	0	0	0	102	0	2	0	0	30	0	0
ENSMUSG00000074001	0	11	0	0	0	0	0	0	0	0	112	56	12	26	0	0	0	2	0	0	0	0	6	2	16	0	0	2
ENSMUSG00000073995	0	0	0	0	0	0	0	0	0	0	0	0	0	0	0	0	0	0	0	0	0	0	0	0	0	0	0	0
ENSMUSG00000073988	0	19	2	2	2	14	4	2	0	0	0	0	0	0	0	2	0	22	22	0	0	0	8	2	0	12	18	4
ENSMUSG00000073987	178	1688	302	199	341	568	514	421	562	183	264	168	114	229	93	166	189	380	498	303	786	894	1380	1308	1191	1148	1837	899
ENSMUSG00000073982	418	921	562	606	1192	2599	857	572	1475	299	1177	961	536	648	175	455	823	1478	659	858	968	1068	753	1262	1051	1362	1003	677
ENSMUSG00000073979	0	0	0	0	0	0	0	0	0	0	2	2	0	0	0	0	0	0	0	0	0	0	0	0	0	0	0	0
ENSMUSG00000073975	0	0	0	0	0	0	0	0	0	0	0	0	0	0	0	0	0	0	0	2	0	0	0	0	0	0	0	0
ENSMUSG00000073974	0	0	0	0	0	0	0	0	0	0	0	0	0	0	0	0	0	0	0	2	0	0	0	0	2	0	0	0
ENSMUSG00000073973	0	0	0	0	0	0	0	0	0	0	0	0	0	0	0	0	0	0	0	0	0	0	0	0	0	0	0	0
ENSMUSG00000073971	0	0	0	0	0	0	0	0	0	2	0	0	0	0	0	0	0	0	4	0	0	0	0	0	0	0	0	0
ENSMUSG00000073970	0	0	0	0	0	0	0	0	0	0	0	0	0	0	0	0	0	0	0	0	0	0	0	0	0	0	0	0
ENSMUSG00000073969	0	0	0	2	2	0	0	0	0	0	0	0	0	0	0	0	0	0	0	20	8	2	2	4	2	2	2	2
ENSMUSG00000073968	0	362	128	99	0	0	4	0	100	16	154	86	40	92	48	8	18	0	2	78	22	166	217	172	169	320	248	347
ENSMUSG00000073967	0	0	0	0	0	0	0	0	0	0	0	0	0	0	0	0	0	0	0	0	0	0	0	0	0	0	0	0
ENSMUSG00000073966	0	0	0	0	0	0	0	0	0	0	0	0	0	0	0	0	0	0	0	0	0	0	0	0	0	0	0	0
ENSMUSG00000073963	0	0	0	0	0	0	0	0	0	0	0	0	0	0	0	0	0	0	0	0	0	0	0	0	0	0	0	0
ENSMUSG00000073956	0	0	0	0	0	0	0	0	0	0	0	0	0	0	0	0	0	0	0	0	0	0	0	0	0	0	0	0
ENSMUSG00000073955	0	0	0	0	0	0	0	0	0	0	0	0	0	0	0	0	0	0	0	0	0	0	0	0	0	0	0	0
ENSMUSG00000073952	0	0	0	0	0	0	0	0	0	0	0	0	0	0	0	0	0	0	0	2	0	0	0	0	0	0	0	0
ENSMUSG00000073950	0	0	0	0	0	0	0	0	0	0	0	0	0	0	0	0	0	0	0	0	0	0	0	0	0	0	0	0
ENSMUSG00000073949	0	2	0	0	0	0	0	0	0	0	6	0	0	0	0	0	0	0	0	0	0	0	0	0	0	0	0	0
ENSMUSG00000073947	0	0	0	0	0	0	0	0	0	0	0	0	0	0	0	0	0	0	0	0	0	0	0	0	0	0	0	0
ENSMUSG00000073940	2	0	0	0	0	0	0	0	0	0	2	0	0	0	0	0	0	0	0	0	0	0	0	0	2	0	0	0
ENSMUSG00000073938	0	0	0	0	0	0	0	0	0	0	0	0	0	0	0	0	0	0	0	0	0	0	0	0	0	0	0	0
ENSMUSG00000073937	0	0	0	0	0	0	0	0	0	0	0	0	0	0	0	0	0	0	0	0	0	0	0	0	0	0	0	0
ENSMUSG00000073932	0	0	0	0	0	0	0	0	0	0	0	0	0	0	0	0	0	0	0	0	0	0	0	0	0	0	0	0
ENSMUSG00000073928	0	0	0	0	0	0	0	0	0	0	0	0	0	0	0	0	0	0	0	0	0	0	0	0	0	0	0	0
ENSMUSG00000073926	0	0	0	0	0	0	0	2	0	0	0	0	0	0	0	0	0	0	0	0	0	0	0	0	0	0	0	0
ENSMUSG00000073925	0	0	0	0	0	0	0	0	0	0	0	0	0	0	0	0	0	0	0	0	0	0	0	0	0	0	0	0
ENSMUSG00000073924	0	0	0	0	0	0	0	0	0	0	0	0	0	0	0	0	0	0	0	0	4	0	0	0	0	0	0	0
ENSMUSG00000073923	0	0	0	0	0	0	0	0	0	0	0	0	0	0	0	0	0	0	0	0	0	0	0	0	0	0	0	0
ENSMUSG00000073920	0	0	0	0	0	0	0	0	0	0	0	0	0	0	0	0	0	0	0	0	0	0	0	0	0	0	0	0
ENSMUSG00000073916	0	0	0	0	0	0	0	0	0	0	0	0	0	0	2	0	0	0	2	0	0	0	0	0	0	0	0	2
ENSMUSG00000073915	0	0	0	2	0	0	0	0	0	0	0	0	0	0	0	0	0	0	0	0	2	0	0	0	0	0	0	0
ENSMUSG00000073914	0	0	0	0	2	0	0	0	0	0	0	0	0	0	0	0	0	0	0	0	0	0	0	0	0	0	0	0
ENSMUSG00000073913	0	0	0	0	0	0	0	0	0	0	0	0	0	0	0	0	0	0	0	0	0	0	0	0	0	0	0	0
ENSMUSG00000073910	108	460	14	8	2	0	2	0	0	10	164	106	34	60	50	2	12	46	18	8	10	4	12	16	9	8	44	10
ENSMUSG00000073909	0	0	0	2	0	0	0	0	0	0	0	0	0	0	0	0	0	0	0	0	0	0	0	0	0	0	0	0
ENSMUSG00000073906	0	0	2	0	0	0	10	0	0	2	0	0	2	0	0	2	0	0	0	0	0	0	0	0	0	0	0	0
ENSMUSG00000073898	0	0	0	0	0	0	0	0	0	0	0	0	0	0	0	0	0	0	0	0	0	0	0	0	0	0	0	0
ENSMUSG00000073897	0	0	0	0	0	0	0	0	0	0	0	0	0	0	0	0	0	0	0	0	0	0	0	0	0	0	0	0
ENSMUSG00000073894	2	4	0	0	14	22	0	0	0	0	0	0	0	0	0	0	0	0	0	0	0	0	0	0	0	0	0	0
ENSMUSG00000073867	0	0	0	0	0	0	0	0	0	0	0	0	0	0	0	0	0	0	0	0	2	0	0	0	0	0	2	0
ENSMUSG00000073862	0	0	0	0	0	0	0	0	0	0	0	0	0	0	0	0	0	0	0	0	0	0	0	0	0	0	0	0
ENSMUSG00000073856	2	38	6	10	19	24	6	4	42	12	26	44	2	18	12	4	4	70	4	6	12	41	95	76	10	38	124	29
ENSMUSG00000073838	2885	2423	3592	2607	1447	2196	1928	1102	6689	784	2711	2011	1233	1793	614	1354	1969	4985	1504	2868	1880	3357	2951	3805	3302	4148	3342	2500
ENSMUSG00000073805	0	2	0	4	69	32	12	0	12	4	34	14	30	6	0	6	14	18	18	2	10	2	0	2	14	8	4	6
ENSMUSG00000073804	0	0	0	0	0	0	0	0	0	0	0	0	0	0	0	0	0	0	0	0	0	0	0	0	0	0	0	0
ENSMUSG00000073803	0	0	0	0	0	0	0	0	0	0	0	0	0	0	0	0	0	0	0	0	0	0	0	0	0	0	0	0
ENSMUSG00000073802	91	589	111	132	192	268	58	60	335	74	212	116	168	57	51	95	182	615	271	498	30	94	52	73	96	119	56	217
ENSMUSG00000073795	0	12	2	0	46	30	2	0	68	0	0	0	0	0	0	0	0	0	2	0	0	0	0	0	0	2	0	0
ENSMUSG00000073794	0	0	0	0	0	0	0	0	0	0	0	0	0	0	0	0	0	0	0	0	0	0	0	0	0	0	0	0
ENSMUSG00000073792	105	146	202	148	395	476	292	135	537	145	436	145	137	76	18	146	198	98	70	144	110	160	85	74	115	160	136	102
ENSMUSG00000073791	129	206	84	84	26	36	86	52	66	38	68	40	22	60	14	28	64	288	115	112	162	188	256	274	364	190	256	213
ENSMUSG00000073781	0	0	0	0	0	0	0	0	0	0	0	0	0	0	0	0	0	0	0	0	0	0	0	0	0	0	0	0
ENSMUSG00000073775	149	334	190	131	125	252	96	66	232	124	702	514	303	269	108	179	300	427	240	486	409	364	288	430	313	506	355	170
ENSMUSG00000073774	0	0	0	0	0	0	0	0	0	0	0	0	0	0	0	0	0	0	0	0	0	0	0	0	0	0	0	0
ENSMUSG00000073771	162	85	176	178	232	146	146	64	538	52	140	90	4	14	2	48	102	228	63	200	63	284	107	178	133	254	185	191
ENSMUSG00000073761	0	0	0	0	0	0	0	0	0	0	0	0	0	0	0	0	0	0	0	0	0	12	0	0	2	8	4	8
ENSMUSG00000073758	20	81	6	28	0	0	270	138	77	12	62	73	14	22	6	81	227	376	26	114	34	22	18	34	32	34	66	46
ENSMUSG00000073755	110	168	88	106	106	46	12	14	124	48	279	166	140	96	46	15	20	189	42	84	280	251	199	211	186	302	224	124
ENSMUSG00000073747	0	0	0	0	2	0	0	0	0	0	0	0	0	0	0	0	0	0	0	0	34	0	0	0	0	0	0	0
ENSMUSG00000073735	0	0	0	0	0	0	0	0	0	0	0	0	0	0	0	0	0	0	0	0	0	0	0	0	0	0	0	0
ENSMUSG00000073733	36	121	106	80	142	225	72	50	294	98	288	180	95	66	12	121	503	88	60	105	14	70	24	33	52	65	30	22
ENSMUSG00000073730	1101	3157	3892	3455	4882	11166	1009	550	4633	2105	3931	3212	2123	5433	1252	1834	3848	4343	2521	5211	3311	4137	2422	3366	4147	5018	2170	2046
ENSMUSG00000073725	986	631	331	397	291	380	329	108	260	287	1358	723	404	285	164	411	364	1036	73	518	279	404	410	351	435	545	492	359
ENSMUSG00000073721	0	0	0	0	0	0	0	0	0	0	0	0	0	0	0	0	0	0	0	0	0	0	2	0	0	0	0	0
ENSMUSG00000073705	2	34	146	102	31	72	56	43	262	12	66	34	22	173	34	117	203	122	44	46	79	158	103	122	250	85	87	99
ENSMUSG00000073702	12028	10313	13936	14236	8781	17900	4717	2912	20276	10315	31394	22536	11737	12265	3872	1173	3342	22092	5445	14147	9092	12990	12463	14493	21046	21594	12575	12564
ENSMUSG00000073700	1409	1960	550	1217	706	1434	992	596	2015	352	2517	2364	1230	1388	532	227	278	1459	323	693	252	943	749	1046	636	1440	952	896
ENSMUSG00000073684	0	139	114	139	299	624	80	84	637	415	1084	926	533	1834	410	97	146	144	60	122	100	239	238	259	143	252	227	166
ENSMUSG00000073680	0	0	0	6	0	10	0	0	2	0	14	14	6	26	12	0	2	0	2	6	0	2	2	0	0	0	0	4
ENSMUSG00000073678	0	22	40	50	40	28	10	2	46	12	28	12	18	20	6	52	27	80	41	12	36	117	28	26	28	24	86	12
ENSMUSG00000073676	579	18	130	126	314	705	1157	859	5213	682	2259	1230	756	1080	298	845	2183	4403	320	1501	966	1189	841	902	2553	2479	868	983
ENSMUSG00000073664	118	180	76	130	658	1038	312	136	108	48	164	62	192	120	58	144	142	266	173	188	145	170	163	74	54	122	153	98
ENSMUSG00000073650	0	0	6	1	0	0	6	4	0	0	12	10	6	0	0	0	26	32	0	0	11	26	8	14	30	16	10	4
ENSMUSG00000073643	553	839	608	375	253	144	152	75	167	460	802	477	393	302	114	210	126	3779	662	467	204	1064	850	747	398	670	739	527
ENSMUSG00000073640	7515	16460	13303	12253	10510	18392	6072	3467	32515	8536	14218	9831	4838	5370	2013	4797	12516	18810	7868	13666	8849	18952	12822	17206	25674	28322	14132	13238
ENSMUSG00000073639	803	742	519	509	898	757	391	218	602	232	1218	562	472	505	295	454	495	1475	471	1174	760	837	1095	1049	1001	1207	1160	925
ENSMUSG00000073633	0	42	8	10	30	68	14	8	6	6	16	18	12	32	4	2	2	10	0	8	10	119	221	259	92	282	289	195
ENSMUSG00000073616	33	42	50	63	45	235	96	44	1272	122	1198	760	191	457	126	32	61	903	114	94	23	56	128	114	101	276	115	85
ENSMUSG00000073609	60	536	224	289	260	390	467	225	867	98	925	828	477	691	146	271	812	492	146	265	141	572	505	711	455	563	676	290
ENSMUSG00000073600	0	34	10	16	2	2	18	2	2	4	146	93	57	50	12	4	0	4	38	0	0	103	24	20	13	171	78	4
ENSMUSG00000073599	0	12	4	18	59	90	448	302	78	2	78	42	22	42	8	40	26	0	0	0	0	10	6	6	0	0	12	4
ENSMUSG00000073598	0	0	0	0	0	0	0	0	0	0	28	22	2	0	8	0	0	0	0	0	0	0	0	0	0	0	0	0
ENSMUSG00000073574	0	0	8	0	4	10	0	0	0	0	0	0	0	0	0	0	0	0	2	0	0	0	0	0	0	2	0	0
ENSMUSG00000073573	0	0	0	0	0	0	0	0	0	0	0	0	0	0	0	0	0	0	0	0	0	0	0	0	0	0	0	0
ENSMUSG00000073568	0	0	8	10	0	0	32	8	0	0	0	0	0	2	0	0	0	2	0	0	0	0	0	2	0	0	0	0
ENSMUSG00000073565	42	6	6	2	12	24	0	0	0	18	101	60	6	32	28	6	46	153	24	64	136	76	120	116	204	184	92	295
ENSMUSG00000073563	193	236	155	192	248	168	94	28	90	105	244	146	134	103	48	72	71	584	208	370	390	426	422	378	505	602	621	415
ENSMUSG00000073557	38	95	221	315	32	26	76	10	20	60	56	36	18	82	45	40	18	184	46	38	81	89	42	22	44	48	54	64
ENSMUSG00000073551	0	0	0	0	0	0	0	0	0	0	0	0	0	0	0	0	0	0	6	0	0	0	0	0	0	2	0	2
ENSMUSG00000073542	127	113	63	142	183	188	34	20	113	47	406	189	216	211	82	92	109	166	46	104	60	132	82	46	218	160	54	51
ENSMUSG00000073532	0	0	0	0	0	0	0	0	0	0	0	0	0	0	0	0	0	0	0	0	0	0	0	0	0	0	0	0
ENSMUSG00000073530	0	108	14	28	2	2	12	52	0	12	12	8	10	6	4	22	8	36	22	12	2	68	0	0	9	0	2	4
ENSMUSG00000073514	4	26	32	38	2	8	2	0	2	0	0	0	0	36	13	20	26	26	0	0	0	0	0	0	0	0	0	4
ENSMUSG00000073492	58	5	4	11	0	8	6	0	8	0	45	30	0	22	14	4	6	30	0	5	10	2	6	10	6	16	10	5
ENSMUSG00000073471	0	108	32	74	44	66	115	65	8	10	42	34	16	48	20	30	59	104	78	14	28	153	91	109	85	437	289	210
ENSMUSG00000073468	333	898	481	664	124	181	179	93	276	139	620	304	207	202	75	97	264	887	404	599	346	273	465	532	476	317	508	488
ENSMUSG00000073460	0	2	2	0	0	0	10	14	318	0	32	8	0	0	0	0	2	34	8	6	4	0	0	0	0	0	0	0
ENSMUSG00000073436	29	135	98	69	301	446	107	64	236	32	745	577	202	32	24	20	54	554	20	16	28	46	32	40	40	68	91	78
ENSMUSG00000073435	555	134	271	283	4069	8134	2414	1893	76	67	1387	1045	94	198	53	94	334	408	181	142	102	246	254	374	251	426	303	368
ENSMUSG00000073434	26	166	475	424	40	62	146	56	62	168	1363	991	332	434	102	350	802	246	122	283	288	491	395	527	806	622	478	177
ENSMUSG00000073433	16	42	66	63	34	82	16	16	130	12	245	216	100	185	48	2	4	42	200	1181	301	74	16	44	119	158	2	10
ENSMUSG00000073423	327	244	194	196	281	494	312	163	349	130	1101	757	377	322	71	159	431	1071	413	549	199	585	598	799	541	813	627	517
ENSMUSG00000073422	127	150	105	106	81	272	366	134	624	68	1130	747	434	570	156	63	272	762	506	188	492	349	439	635	265	946	450	776
ENSMUSG00000073421	0	352	4	0	10	6	10	10	170	30	362	338	47	2	6	0	0	22	100	0	4	16	0	4	13	0	0	284
ENSMUSG00000073418	196	3047	3537	3350	80	150	2586	253	439	567	658	492	509	92	38	69	311	1401	2890	657	48	356	3205	4593	2808	10716	16957	4432
ENSMUSG00000073414	34	0	0	0	0	0	2	2	0	0	0	0	0	2	0	0	0	0	4	32	0	0	0	2	0	0	0	0
ENSMUSG00000073413	0	0	0	0	0	0	4	2	0	0	0	0	0	0	0	0	0	0	0	0	0	0	0	0	0	2	0	0
ENSMUSG00000073412	0	0	0	0	0	0	0	0	0	0	10	0	0	0	0	0	2	0	0	0	0	0	0	0	0	0	0	0
ENSMUSG00000073408	0	0	0	0	0	0	0	0	0	0	0	0	0	0	0	0	0	0	0	0	0	0	0	0	0	0	20	0
ENSMUSG00000073400	0	0	0	0	20	20	0	0	0	0	2	0	0	0	0	0	0	0	4	0	0	0	2	0	0	2	0	0
ENSMUSG00000073399	0	0	0	0	0	0	0	0	4	0	0	0	0	0	0	0	0	0	0	0	0	0	0	0	0	0	0	0
ENSMUSG00000073396	0	0	0	0	0	0	0	0	0	0	0	0	0	0	0	0	0	0	0	0	0	0	0	0	0	0	0	0
ENSMUSG00000073388	0	0	0	0	0	0	0	0	0	0	0	0	0	0	0	0	0	10	0	0	8	18	16	18	4	11	12	4
ENSMUSG00000073380	0	0	0	0	0	0	0	0	0	2	0	0	0	0	0	0	0	0	0	0	0	0	0	2	0	0	2	2
ENSMUSG00000073377	0	0	0	0	0	0	0	0	0	0	0	0	0	0	0	0	0	0	0	0	0	0	0	0	0	0	0	0
ENSMUSG00000073375	0	0	0	0	0	0	0	0	0	0	0	0	0	0	0	0	0	0	0	2	0	0	0	0	0	0	0	0
ENSMUSG00000073295	0	2	6	32	0	0	0	0	0	0	0	0	0	0	4	2	0	2	0	0	0	2	0	0	0	0	0	0
ENSMUSG00000073294	0	0	0	0	0	2	0	0	0	0	0	0	0	0	0	0	0	0	0	0	0	0	0	0	0	0	0	0
ENSMUSG00000073243	0	0	0	0	0	0	0	0	0	0	0	0	0	0	0	0	0	0	0	0	0	0	0	0	0	0	0	0
ENSMUSG00000073234	0	0	0	0	0	0	0	2	0	0	0	0	0	0	0	0	0	0	0	0	0	0	0	0	0	0	0	0
ENSMUSG00000073209	0	0	0	0	0	0	0	0	0	0	0	2	0	0	0	0	0	0	0	0	0	0	0	0	0	4	0	0
ENSMUSG00000073207	0	0	0	0	0	0	0	0	0	0	2	2	0	12	10	2	0	18	12	0	8	2	32	27	6	16	0	10
ENSMUSG00000073177	0	0	0	0	0	0	0	0	0	0	0	0	0	0	0	0	0	0	0	0	0	0	0	0	0	0	2	0
ENSMUSG00000073176	82	106	46	70	67	60	86	18	15	48	67	30	24	22	8	16	20	96	40	48	71	78	82	70	70	74	94	43
ENSMUSG00000073141	0	0	0	0	6	2	2	0	0	0	0	0	4	0	0	0	0	0	0	0	2	0	0	0	0	0	0	0
ENSMUSG00000073139	175	88	26	53	216	222	278	143	288	108	865	794	360	474	132	119	184	403	186	220	160	433	416	393	286	338	563	320
ENSMUSG00000073131	71	18	20	39	59	62	74	48	106	175	673	490	215	90	32	14	18	372	106	260	126	108	90	89	115	110	76	52
ENSMUSG00000073130	0	0	0	0	0	0	0	0	0	0	0	2	0	0	0	0	0	0	0	0	0	0	0	0	0	0	0	0
ENSMUSG00000073102	0	8	4	0	34	20	4	2	0	6	8	8	4	0	0	0	0	0	4	4	4	10	0	0	6	14	2	6
ENSMUSG00000073096	325	223	59	141	171	260	34	39	96	35	228	175	76	83	28	20	39	345	44	206	18	346	168	254	162	406	104	211
ENSMUSG00000073094	0	0	0	0	0	0	0	0	0	0	2	2	0	0	0	0	0	0	0	0	0	0	0	0	0	0	0	0
ENSMUSG00000073090	0	0	0	0	0	0	0	0	0	0	0	0	0	0	0	0	0	0	0	0	0	0	0	0	0	0	0	0
ENSMUSG00000073085	0	0	0	0	0	0	0	0	0	0	0	0	0	0	0	0	0	0	0	0	0	0	0	0	0	0	2	0
ENSMUSG00000073077	0	0	0	0	4	10	2	0	20	0	0	0	0	0	0	0	0	10	0	4	0	0	0	0	0	0	0	0
ENSMUSG00000073072	0	0	0	0	0	0	0	0	0	0	0	0	0	0	0	0	0	0	0	0	0	0	0	0	0	0	0	0
ENSMUSG00000073062	139	497	249	403	340	372	364	135	388	465	538	320	271	365	111	150	160	452	112	114	270	265	223	265	222	234	439	207
ENSMUSG00000073043	0	0	0	0	0	0	0	0	0	0	0	0	0	0	0	0	0	0	0	0	0	0	0	2	0	0	0	0
ENSMUSG00000073027	0	0	0	0	0	0	0	0	0	0	0	0	0	0	0	0	0	0	0	92	54	40	58	58	44	130	56	100
ENSMUSG00000073018	0	0	0	0	0	0	0	0	0	0	0	0	0	0	0	0	0	0	0	0	0	0	0	0	0	0	0	0
ENSMUSG00000073016	193	208	242	255	92	112	46	24	78	236	1313	562	374	137	117	144	133	28	24	28	18	77	34	18	16	20	60	10
ENSMUSG00000073010	0	0	0	0	0	0	0	0	0	0	128	70	2	0	0	0	0	0	0	0	0	0	0	0	2	0	0	0
ENSMUSG00000073008	0	0	0	0	0	0	0	0	0	0	0	0	0	0	0	0	0	0	0	0	0	0	0	0	0	0	0	0
ENSMUSG00000073007	0	0	0	0	0	0	0	0	0	0	0	0	0	0	0	2	0	0	0	0	0	2	0	0	0	0	0	0
ENSMUSG00000073006	0	0	0	0	0	2	0	0	0	0	0	0	0	0	0	0	0	0	0	0	0	0	0	0	0	0	0	0
ENSMUSG00000073001	0	0	0	0	0	0	0	0	0	0	0	0	0	0	0	0	0	0	0	0	0	0	0	0	0	0	0	0
ENSMUSG00000073000	0	0	0	0	0	0	0	0	0	0	0	0	0	0	0	0	0	0	0	0	0	0	0	0	0	0	0	0
ENSMUSG00000072999	0	0	0	0	0	0	0	0	0	0	0	0	0	0	0	0	0	0	0	0	0	0	0	0	0	0	0	0
ENSMUSG00000072995	0	0	0	0	0	0	0	0	0	0	0	0	0	0	0	0	0	0	0	0	0	0	0	0	0	0	0	0
ENSMUSG00000072983	0	0	0	0	0	0	0	0	0	0	0	0	0	0	0	0	0	0	0	0	0	0	0	0	0	0	0	0
ENSMUSG00000072980	38	0	117	105	16	16	2	0	40	10	111	72	23	100	2	52	73	22	60	6	6	56	0	2	59	4	6	8
ENSMUSG00000072972	0	0	12	24	0	0	0	0	10	0	6	2	6	0	0	0	0	10	0	4	0	0	0	0	0	0	0	0
ENSMUSG00000072969	0	20	67	106	0	0	0	0	2	18	44	28	34	24	20	124	166	554	203	321	76	200	334	358	255	294	350	327
ENSMUSG00000072964	651	180	90	72	38	48	38	4	261	4	180	56	33	34	30	38	20	320	120	36	107	265	360	290	413	358	239	359
ENSMUSG00000072963	0	0	0	0	0	0	2	2	0	0	0	0	0	4	0	0	4	0	0	0	0	0	4	8	0	0	0	4
ENSMUSG00000072962	0	0	0	0	0	0	0	0	0	0	0	0	0	0	0	0	0	0	0	0	0	0	0	0	0	0	0	0
ENSMUSG00000072946	409	231	168	208	86	102	82	42	282	125	538	361	118	126	68	220	307	584	349	98	96	127	98	103	219	108	210	129
ENSMUSG00000072945	2	0	0	0	0	0	0	0	0	0	0	0	0	0	0	0	0	0	0	0	0	38	0	0	22	0	0	0
ENSMUSG00000072944	0	0	0	0	0	0	6	4	18	8	4	2	12	20	2	0	0	0	0	0	0	0	10	6	0	0	45	6
ENSMUSG00000072941	1548	1068	998	913	98	48	47	12	4	20	8	8	4	2	2	4	6	106	2825	420	8	250	890	1589	480	1037	346	1730
ENSMUSG00000072919	3	0	0	0	0	0	0	0	4	0	0	0	0	2	0	0	4	0	0	0	0	0	0	0	0	0	0	0
ENSMUSG00000072889	84	214	94	138	122	96	332	109	310	111	346	152	114	134	50	138	285	242	183	152	225	370	382	316	437	516	332	302
ENSMUSG00000072888	0	0	0	0	0	0	0	0	0	0	0	0	0	0	0	0	0	0	0	0	0	0	0	0	0	0	0	0
ENSMUSG00000072875	4	2	2	6	4	4	8	12	2	18	22	7	20	8	2	0	2	68	26	58	192	54	64	83	130	280	8	52
ENSMUSG00000072872	90	562	234	326	139	99	56	38	155	159	872	580	223	275	85	82	76	194	391	216	199	240	258	221	181	225	180	173
ENSMUSG00000072845	0	0	0	0	0	0	0	0	0	0	0	0	0	0	0	0	0	0	0	0	0	0	0	0	0	0	0	0
ENSMUSG00000072825	665	1803	1082	1782	3557	2735	627	338	2285	728	3726	3626	1629	833	420	1185	1036	5063	1604	1520	2280	2129	1833	2779	1591	2687	2860	1167
ENSMUSG00000072812	2204	4482	1390	1076	4340	5729	4319	3105	2845	1568	19387	16912	4371	1874	954	77	214	8218	8063	6758	2850	2475	8697	13049	1955	2462	7656	3151
ENSMUSG00000072791	38	0	0	0	0	0	96	32	0	6	0	0	0	0	0	8	16	637	682	941	1322	0	0	0	0	0	0	0
ENSMUSG00000072772	1207	769	1336	1135	834	1300	954	578	2388	455	3516	2525	777	907	213	418	1053	3263	637	819	948	2059	2443	3739	1721	3555	2984	2009
ENSMUSG00000072770	0	2	44	10	0	0	14	8	4	0	0	0	0	8	4	4	18	20	16	12	2	14	36	44	30	30	76	69
ENSMUSG00000072769	0	0	0	0	0	0	0	0	0	0	0	0	0	0	0	0	0	8	0	0	0	0	0	0	0	0	0	2
ENSMUSG00000072754	0	0	0	0	0	0	0	0	0	4	4	0	10	6	0	0	0	0	0	0	0	0	0	0	0	0	0	0
ENSMUSG00000072720	2	0	0	6	22	14	0	8	0	0	34	18	14	2	2	46	40	8	4	2	0	2	2	0	26	0	0	0
ENSMUSG00000072704	17	68	46	43	26	20	21	8	26	28	635	397	198	95	26	16	22	159	58	60	38	52	41	29	49	66	30	36
ENSMUSG00000072694	0	0	0	0	0	0	0	0	0	0	0	0	0	0	0	0	0	0	0	0	0	0	0	0	0	0	0	0
ENSMUSG00000072693	0	0	0	0	0	0	0	0	0	0	0	0	0	0	0	0	0	54	6	4	24	16	0	8	12	6	4	12
ENSMUSG00000072664	0	156	69	30	0	0	0	0	0	0	0	0	2	0	0	14	14	0	32	0	4	0	0	0	0	0	0	0
ENSMUSG00000072663	2	0	0	0	2	8	0	0	0	0	2	0	0	0	0	0	0	14	8	2	0	0	0	2	6	8	8	2
ENSMUSG00000072662	0	0	4	2	6	0	2	0	4	0	0	0	0	0	0	0	0	6	0	0	0	0	6	4	4	26	6	14
ENSMUSG00000072640	43	22	24	24	18	42	65	36	139	32	150	134	30	43	15	18	12	40	12	16	12	29	23	14	32	60	18	14
ENSMUSG00000072625	4	0	0	0	0	0	62	2	0	0	0	0	0	0	0	0	0	0	0	0	0	0	0	0	0	0	0	0
ENSMUSG00000072624	0	0	0	0	0	0	0	0	0	0	0	0	0	0	0	0	0	0	0	0	0	0	0	0	0	0	0	0
ENSMUSG00000072618	0	0	0	0	0	0	0	0	0	0	0	0	0	0	0	0	0	0	0	0	0	0	0	0	0	0	0	0
ENSMUSG00000072584	0	0	0	0	0	0	0	0	0	0	0	0	0	0	0	0	0	0	0	0	0	0	0	0	0	0	0	0
ENSMUSG00000072582	280	684	687	483	157	422	360	241	1029	236	1276	704	358	314	96	143	230	602	234	512	269	290	427	441	488	333	437	195
ENSMUSG00000072575	0	0	0	0	0	0	0	0	0	0	8	0	0	0	0	0	0	2	0	0	0	0	0	0	2	0	0	0
ENSMUSG00000072573	0	0	0	0	0	0	0	0	0	0	0	0	0	0	0	0	0	0	0	0	0	0	0	0	0	0	0	0
ENSMUSG00000072572	0	4	0	0	0	0	2	0	0	2	0	0	0	2	0	0	0	28	0	0	0	0	28	24	0	2	0	0
ENSMUSG00000072571	0	0	0	2	6	0	0	0	0	2	10	22	4	4	0	0	6	0	6	6	14	18	81	107	16	38	49	12
ENSMUSG00000072568	0	2	12	30	38	14	24	6	6	2	16	10	60	52	55	0	2	2	8	7	0	12	6	8	12	18	0	16
ENSMUSG00000072553	0	10	14	14	0	0	0	0	0	0	2	0	0	0	0	0	0	0	0	2	0	0	2	0	2	12	0	10
ENSMUSG00000072511	0	0	0	0	0	0	0	0	0	0	0	2	0	0	2	0	0	0	0	0	0	0	0	0	0	0	0	0
ENSMUSG00000072501	226	931	500	613	395	356	417	117	278	276	976	467	459	322	149	180	272	488	185	377	614	448	524	364	370	476	771	396
ENSMUSG00000072494	16	16	58	62	30	66	4	6	6	16	15	15	6	23	12	11	52	76	14	4	6	17	6	20	10	36	8	8
ENSMUSG00000072487	0	0	0	0	8	6	0	0	0	0	0	0	0	0	2	0	0	20	6	0	0	0	0	0	0	0	0	0
ENSMUSG00000072476	527	926	583	585	527	574	464	201	1376	224	927	744	529	722	169	431	600	1473	840	962	524	1356	862	1319	1144	1490	1090	630
ENSMUSG00000072473	0	0	0	0	0	0	0	0	0	0	0	0	0	0	0	0	0	0	0	0	0	0	0	0	0	0	0	0
ENSMUSG00000072437	2	4	0	4	0	12	2	2	2	0	54	50	26	8	2	0	0	40	0	6	0	0	8	12	6	0	2	0
ENSMUSG00000072423	0	0	0	0	0	0	0	0	2	0	0	0	0	0	0	0	0	0	0	0	0	0	0	20	0	2	2	0
ENSMUSG00000072419	0	0	0	0	0	0	0	0	0	0	0	0	0	0	0	0	0	0	0	0	0	0	0	0	0	0	0	0
ENSMUSG00000072295	0	0	0	0	0	0	0	0	0	0	0	0	0	0	0	4	6	0	0	0	0	0	0	0	4	0	0	0
ENSMUSG00000072294	14	52	16	22	18	12	61	34	2	22	6	0	8	4	2	36	51	4	24	46	0	70	56	44	40	86	82	28
ENSMUSG00000072258	16	276	73	126	217	216	308	112	227	712	402	248	134	155	42	100	176	126	64	16	81	70	116	102	86	112	159	118
ENSMUSG00000072244	69	0	6	0	2	0	0	0	0	71	227	98	78	120	30	13	26	60	168	50	88	62	65	82	40	88	83	69
ENSMUSG00000072082	30	60	667	819	66	40	50	6	210	58	192	130	144	670	47	184	136	58	58	172	62	551	109	133	902	134	82	62
ENSMUSG00000071984	2879	18353	1640	4731	3569	5510	16764	5002	6927	68	62	42	32	311	678	122	381	865	1163	5732	13501	4347	4684	5850	2065	6907	16195	2212
ENSMUSG00000071909	0	0	0	0	0	0	0	0	0	0	0	0	0	0	0	0	0	0	0	0	0	2	0	0	0	0	0	0
ENSMUSG00000071890	0	4	0	0	2	0	0	0	0	0	0	0	0	0	0	0	0	0	2	0	0	0	0	0	0	0	0	0
ENSMUSG00000071862	0	2	0	6	2	4	0	2	0	12	6	4	0	2	0	4	0	0	2	0	0	14	4	0	20	0	2	8
ENSMUSG00000071860	0	0	0	0	2	0	0	0	0	0	0	2	0	0	0	0	2	0	0	0	6	0	0	0	0	0	0	0
ENSMUSG00000071858	0	0	0	0	0	0	0	0	0	0	0	0	0	0	0	0	0	0	0	0	0	0	0	0	0	0	0	0
ENSMUSG00000071856	142	244	14	18	346	124	142	133	140	16	112	38	84	10	14	196	157	411	40	284	491	224	395	274	122	166	458	52
ENSMUSG00000071855	55	176	87	101	56	98	132	85	130	84	453	224	143	121	48	113	146	204	54	120	196	180	253	272	262	148	229	188
ENSMUSG00000071847	2	0	74	28	162	90	2307	664	88	220	78	48	18	547	63	80	290	1468	1393	206	48	18	58	69	40	20	6	32
ENSMUSG00000071773	0	0	0	0	0	0	0	0	0	0	0	0	0	0	0	0	0	2	0	0	0	0	0	0	0	0	0	0
ENSMUSG00000071766	0	0	0	0	0	0	0	0	0	0	0	0	0	0	0	0	0	0	0	0	0	0	0	0	0	0	0	0
ENSMUSG00000071764	0	0	0	0	0	0	0	0	0	0	0	0	0	0	0	0	0	0	0	0	0	0	0	0	0	0	0	0
ENSMUSG00000071757	137	536	552	511	204	164	122	64	118	112	408	235	79	116	44	233	352	1106	338	234	417	615	732	731	431	831	522	497
ENSMUSG00000071749	0	0	0	0	0	0	2	0	0	0	0	0	0	0	0	0	0	0	0	4	0	0	0	0	0	0	0	0
ENSMUSG00000071748	131	100	31	54	108	60	30	26	193	24	152	84	87	87	34	24	36	57	22	32	70	150	92	109	139	188	136	74
ENSMUSG00000071726	0	0	0	0	0	0	0	0	0	0	0	0	0	0	0	0	0	0	0	0	0	0	0	0	0	0	0	0
ENSMUSG00000071724	0	128	368	511	0	0	0	0	0	46	2	0	0	0	0	0	6	10	6	0	2	10	22	26	3	4	6	4
ENSMUSG00000071722	0	24	24	25	6	0	0	0	0	6	8	14	6	10	4	4	4	42	0	18	58	40	30	34	42	50	56	27
ENSMUSG00000071719	139	133	6	10	344	183	10	8	4	2	10	4	40	6	7	2	2	10	0	2	20	0	0	2	6	2	0	0
ENSMUSG00000071715	0	0	91	28	0	0	0	0	0	0	1453	1317	562	2	0	53	96	0	14	0	0	0	0	0	0	0	0	0
ENSMUSG00000071713	0	0	18	2	0	2	0	0	4	0	0	0	0	0	0	0	0	0	110	0	4	4	0	0	1	2	0	8
ENSMUSG00000071711	271	608	1267	1034	0	0	345	190	1138	528	3152	2839	1321	2227	520	362	892	1797	272	284	451	737	345	499	653	1042	492	427
ENSMUSG00000071708	768	756	316	328	1086	1818	378	198	655	208	916	416	419	199	103	587	722	246	201	364	244	173	157	153	414	107	170	62
ENSMUSG00000071691	0	2	0	0	4	6	10	0	6	24	28	12	6	256	67	0	4	26	0	6	16	8	8	6	0	26	10	14
ENSMUSG00000071686	0	0	0	0	0	0	0	0	0	0	0	0	0	0	0	0	0	0	0	0	0	0	0	0	0	0	0	0
ENSMUSG00000071679	0	0	0	0	0	0	0	0	0	0	0	0	0	0	0	0	0	0	73	0	0	0	0	0	0	0	0	2
ENSMUSG00000071669	597	426	148	166	349	132	236	94	276	142	718	788	254	279	96	225	280	622	143	101	100	232	148	110	112	82	170	90
ENSMUSG00000071665	0	0	0	0	4	4	0	0	0	0	0	0	0	0	0	0	0	0	16	0	0	0	0	0	0	0	0	0
ENSMUSG00000071662	849	404	926	694	534	1025	1121	854	1511	616	1970	1367	1009	579	296	240	581	970	365	1032	762	963	1372	1451	930	1201	1219	768
ENSMUSG00000071661	129	244	122	141	85	118	8	8	164	50	268	188	110	125	34	16	36	134	32	162	92	148	134	168	142	153	176	52
ENSMUSG00000071660	132	55	48	46	117	171	44	29	95	18	66	38	18	48	18	86	113	306	41	55	7	35	62	40	30	40	56	32
ENSMUSG00000071659	5581	6634	4091	4232	3577	3719	3219	1604	3616	1899	8393	4661	2981	2992	1136	1968	3065	5283	1242	3270	2603	3714	3522	3251	4364	3863	3409	2806
ENSMUSG00000071658	2	4	2	9	6	18	15	14	7	0	8	2	0	0	0	2	0	2	0	2	0	0	6	10	2	6	2	6
ENSMUSG00000071657	2201	2521	1197	1290	1566	2917	3275	2490	3010	535	5629	4036	1758	903	316	898	1771	3624	1169	1027	763	1642	1424	1686	1766	1927	1714	1904
ENSMUSG00000071656	435	42	184	151	197	208	34	8	148	1155	1263	871	288	879	203	38	64	464	2	104	2	32	18	18	13	10	50	38
ENSMUSG00000071655	1162	6308	4162	3864	2282	3880	2817	1732	4347	2139	6564	4436	2460	2146	722	1471	2859	5222	1980	2410	1977	2920	3688	4067	3289	4541	4565	3222
ENSMUSG00000071654	125	46	244	271	361	740	58	76	141	58	565	353	115	45	10	0	0	266	106	161	209	229	471	501	257	543	332	371
ENSMUSG00000071652	849	1409	1657	1422	917	1448	1196	570	1418	322	2824	2449	1399	1651	587	518	830	1771	602	1063	755	1435	1386	1908	1250	1769	1798	749
ENSMUSG00000071650	3750	6292	9508	10325	5935	5115	8673	5303	12982	2610	20553	16091	18137	8522	3274	2890	5408	11079	2448	4504	5351	5589	5086	5231	4267	8268	7605	3033
ENSMUSG00000071649	1268	1647	1501	1433	2523	2635	5481	3985	4084	309	1633	1334	894	634	225	700	1417	1229	415	1094	411	615	942	1315	638	1506	1162	704
ENSMUSG00000071648	0	55	103	56	4	629	79	38	81	20	886	590	114	327	93	100	212	198	279	203	67	242	198	282	235	695	257	260
ENSMUSG00000071647	1370	1620	2705	2580	2127	4371	3444	1659	3851	1070	3956	3418	1310	2086	381	913	1864	3804	1816	2138	1038	2499	2109	2466	3046	4096	2201	2363
ENSMUSG00000071646	2774	8471	8881	9982	2369	2819	2328	1426	4467	2138	4690	3260	2294	3653	992	1663	2874	4402	1702	2259	1866	3101	3669	4331	2820	2933	4217	1997
ENSMUSG00000071645	572	691	751	742	449	689	461	274	864	359	1718	1246	773	660	172	507	1162	1827	400	665	453	697	741	1099	724	909	989	571
ENSMUSG00000071644	19040	42475	62715	64086	41623	54466	17323	11032	78260	23080	64273	58004	36784	39982	13791	14195	30351	71107	18871	46518	30282	42302	21222	25611	44169	57540	27345	22017
ENSMUSG00000071636	0	0	0	2	0	0	2	0	0	2	14	6	10	12	6	0	0	20	32	6	0	4	2	8	0	2	2	2
ENSMUSG00000071633	0	0	0	0	4	0	4	2	0	0	0	0	0	2	0	0	0	0	0	2	0	0	0	0	4	2	6	0
ENSMUSG00000071632	20	35	50	40	14	14	8	6	6	14	94	32	22	21	8	8	2	90	31	4	32	10	12	26	18	33	36	8
ENSMUSG00000071604	12	172	20	22	2	0	22	18	0	62	2372	1695	657	44	18	0	0	442	72	182	5	24	22	20	34	60	16	113
ENSMUSG00000071573	2	100	26	44	26	34	50	30	110	48	272	112	90	52	24	28	30	108	105	14	148	195	49	49	487	606	32	245
ENSMUSG00000071553	2	2	0	2	0	0	2	0	10	0	2	4	6	0	0	2	6	0	0	0	2	2	0	0	18	16	0	4
ENSMUSG00000071552	0	0	0	0	0	0	0	0	0	0	0	0	0	0	0	0	0	2	0	0	0	0	0	0	0	0	0	0
ENSMUSG00000071550	2	0	2	0	0	0	16	8	2	0	2	0	0	0	0	0	0	2	4	4	0	8	2	0	12	0	0	6
ENSMUSG00000071547	260	1991	1644	1424	1234	3463	314	191	3266	792	1361	1009	943	1210	243	1201	3110	1101	422	42	1803	752	196	313	309	2457	203	252
ENSMUSG00000071540	0	0	0	2	2	0	0	0	0	0	6	0	2	0	0	0	0	24	6	0	0	21	0	0	14	10	2	0
ENSMUSG00000071537	22	0	12	15	0	0	0	0	0	2	130	66	90	195	51	27	16	230	50	0	2	6	1	2	2	2	10	16
ENSMUSG00000071533	845	747	614	573	365	399	196	63	436	350	1539	897	418	470	156	450	443	717	467	640	678	738	841	761	1048	912	924	641
ENSMUSG00000071531	0	0	216	88	0	2	10	4	22	0	60	54	16	24	4	2	0	6	4	0	0	28	0	0	32	36	0	0
ENSMUSG00000071528	352	559	651	588	250	1607	260	163	1170	191	1237	951	284	228	89	227	335	2299	273	469	370	680	611	964	977	1793	628	589
ENSMUSG00000071506	0	0	2	2	0	0	0	0	0	0	2	0	0	0	0	0	4	26	6	56	0	0	0	2	2	0	0	0
ENSMUSG00000071497	345	464	584	706	386	730	250	196	876	272	1390	895	505	606	167	526	644	937	405	985	357	647	518	540	733	741	633	292
ENSMUSG00000071489	10	0	0	0	0	0	2	0	0	0	0	0	0	0	0	0	0	0	0	4	8	0	0	0	0	4	0	0
ENSMUSG00000071477	647	1208	1199	1215	761	1075	499	278	1876	799	2222	1810	980	1076	337	399	696	1427	860	1062	801	1158	1373	1884	1248	1683	1751	943
ENSMUSG00000071471	0	0	0	0	0	0	0	0	0	0	0	0	0	0	0	0	0	0	0	0	0	0	0	0	0	0	0	0
ENSMUSG00000071470	0	0	0	0	8	2	4	4	14	0	36	14	8	8	0	114	112	0	0	0	0	0	0	0	0	0	0	0
ENSMUSG00000071456	0	0	0	0	0	0	0	0	0	0	0	0	0	0	0	0	0	4	0	0	0	0	0	0	0	0	0	0
ENSMUSG00000071454	30	333	392	343	263	484	503	161	704	90	298	275	176	202	82	73	122	508	192	54	44	584	539	657	767	605	720	573
ENSMUSG00000071451	397	763	416	411	247	471	471	268	697	451	636	413	355	263	94	383	833	793	137	274	500	446	436	485	713	730	374	409
ENSMUSG00000071434	2	0	0	0	0	0	0	0	0	0	0	0	0	0	0	0	0	0	2	0	0	0	0	0	0	2	0	0
ENSMUSG00000071424	0	4	4	0	0	6	152	24	26	0	0	0	0	2	0	2	0	0	0	2	2	0	0	4	0	0	36	0
ENSMUSG00000071415	10649	16399	18992	18027	12093	23721	7304	4282	29014	13843	30434	20131	11743	10874	4229	6093	13561	28288	7396	13880	12570	14050	13483	16034	26270	24516	13355	13233
ENSMUSG00000071398	0	0	0	0	0	0	0	0	0	0	19	15	7	0	0	0	2	4	0	0	2	0	2	2	0	0	6	0
ENSMUSG00000071392	0	2	0	0	0	0	2	0	16	0	0	0	0	0	0	0	0	0	4	0	2	0	2	3	0	6	8	0
ENSMUSG00000071369	72	1695	89	246	230	360	13	18	4	197	36	16	32	356	318	146	250	116	110	48	904	28	8	8	39	30	2	14
ENSMUSG00000071359	107	150	173	140	86	108	95	62	54	83	246	122	102	118	50	59	109	486	106	279	246	265	225	220	384	466	173	181
ENSMUSG00000071356	0	10	0	0	0	0	0	0	0	0	0	0	0	0	0	0	0	0	0	0	0	0	0	0	0	0	0	0
ENSMUSG00000071350	98	148	44	62	63	68	53	22	132	10	40	32	14	12	4	34	56	72	80	84	133	232	288	231	459	206	225	243
ENSMUSG00000071347	0	0	0	0	2	0	0	2	48	0	0	0	0	0	0	2	8	10	6	0	0	0	0	2	0	0	0	0
ENSMUSG00000071342	0	4	16	102	0	0	6	2	6	0	58	30	12	0	0	2	0	0	0	0	0	0	0	0	2	6	0	0
ENSMUSG00000071340	0	0	0	0	0	2	0	0	20	0	4	0	0	0	0	0	0	4	0	0	0	12	2	5	6	8	2	2
ENSMUSG00000071337	104	406	351	521	260	185	172	76	218	127	376	194	124	158	38	201	255	385	174	137	161	158	284	208	202	328	339	158
ENSMUSG00000071324	6	1	2	0	14	22	26	12	54	2	0	0	2	2	2	0	4	6	18	4	8	18	12	1	4	12	2	8
ENSMUSG00000071317	169	62	14	16	0	0	6	0	6	0	12	14	6	18	6	41	40	0	80	0	639	369	92	90	658	328	42	134
ENSMUSG00000071311	0	0	0	0	0	0	0	0	0	0	0	0	0	0	0	0	0	0	0	0	0	0	0	0	0	0	0	0
ENSMUSG00000071253	123	144	82	115	169	134	161	64	96	88	410	164	149	75	58	100	126	330	98	84	92	157	107	80	89	216	160	91
ENSMUSG00000071252	30	94	39	30	26	72	36	20	52	34	64	42	46	20	10	24	16	108	20	16	86	80	72	74	58	110	78	89
ENSMUSG00000071235	0	0	0	0	0	0	0	2	221	0	0	0	0	0	0	0	0	0	0	0	0	0	0	0	0	0	0	0
ENSMUSG00000071229	0	0	0	0	0	0	0	0	0	0	0	0	0	0	0	0	0	0	0	0	0	0	0	2	0	0	0	0
ENSMUSG00000071226	2	106	14	24	0	0	0	0	2	0	0	2	10	2	0	20	20	2	2	0	0	0	0	2	6	0	0	2
ENSMUSG00000071202	0	0	2	0	4	8	127	60	0	0	0	0	0	0	0	2	28	2	0	0	6	14	8	6	22	56	20	42
ENSMUSG00000071192	6	0	10	6	97	188	224	106	88	10	288	226	91	72	20	0	2	154	82	2	16	32	32	56	22	44	58	42
ENSMUSG00000071181	0	0	0	2	0	0	0	0	0	0	0	0	2	0	0	0	0	0	0	0	0	0	2	0	0	0	0	0
ENSMUSG00000071180	131	150	115	74	80	88	36	18	76	54	395	218	133	117	53	73	80	160	68	100	55	95	104	67	103	138	102	67
ENSMUSG00000071179	0	0	0	0	0	0	0	0	0	0	0	2	0	0	0	0	0	0	0	0	0	0	0	0	0	0	0	0
ENSMUSG00000071176	1104	3512	1599	2871	997	916	1178	522	991	1164	3599	2682	1276	1557	608	1653	2347	1256	1060	2607	1217	2609	1491	1508	1853	2793	2287	1286
ENSMUSG00000071172	696	1449	2310	2336	1327	1701	399	339	1325	430	1790	1025	1096	909	310	711	773	1452	779	969	963	1018	890	797	1396	1453	764	565
ENSMUSG00000071169	0	0	0	0	0	0	0	0	0	0	0	0	0	0	0	0	0	0	0	0	0	0	0	0	0	0	0	0
ENSMUSG00000071165	0	0	0	0	0	0	0	0	0	0	0	0	0	0	0	0	0	0	0	0	0	0	0	0	0	0	0	0
ENSMUSG00000071158	0	0	0	0	0	0	0	0	0	0	0	0	0	0	0	0	0	0	0	0	0	0	0	0	0	0	0	0
ENSMUSG00000071151	749	1042	743	746	793	1436	577	527	2595	990	2959	2223	975	872	353	464	1079	3605	663	1539	658	1001	903	1338	1015	1464	1133	746
ENSMUSG00000071150	0	0	0	0	0	0	0	0	0	0	0	0	0	0	0	0	0	0	0	0	0	0	0	0	0	0	0	0
ENSMUSG00000071149	0	0	0	0	0	0	0	0	0	0	0	0	0	0	0	0	0	0	0	0	0	0	0	0	0	0	0	0
ENSMUSG00000071147	0	2	0	2	0	0	0	0	0	0	0	0	0	0	0	0	0	0	0	0	0	0	0	0	0	0	0	0
ENSMUSG00000071138	0	0	0	0	0	2	0	0	0	0	0	0	0	0	0	0	0	0	0	0	0	0	0	0	0	2	0	0
ENSMUSG00000071113	0	0	0	2	4	8	4	0	0	0	92	64	40	0	0	4	4	0	2	4	0	0	2	0	0	0	0	0
ENSMUSG00000071112	0	0	0	2	0	0	0	0	2	0	12	10	0	0	0	0	0	0	0	0	0	2	0	0	0	0	0	0
ENSMUSG00000071104	0	0	2	2	0	2	4	4	0	0	0	0	0	0	0	20	12	0	4	0	4	0	0	0	0	0	0	0
ENSMUSG00000071103	0	8	4	4	0	4	2	0	2	0	2	0	2	0	0	6	30	0	8	0	0	4	8	4	7	8	2	2
ENSMUSG00000071089	0	18	0	2	0	0	2	2	0	0	0	0	0	0	0	0	0	0	38	0	2	0	4	2	2	12	2	6
ENSMUSG00000071078	64	96	44	29	92	139	86	82	378	20	100	90	58	135	32	34	40	510	247	40	92	283	209	304	388	567	183	229
ENSMUSG00000071076	2000	5055	2860	3625	4580	7163	1287	1060	3539	2036	4524	3871	1581	3355	585	1250	2711	13016	3595	4631	2019	3728	3501	6867	3246	6560	5821	2243
ENSMUSG00000071074	3826	2884	1702	1804	3713	5585	2645	1326	4257	1591	8381	6155	3484	3827	1269	1481	2945	6078	1893	2290	1777	2681	3184	4431	2325	5296	3984	2899
ENSMUSG00000071073	8	10	22	48	102	146	170	117	148	40	160	164	50	46	6	40	89	72	38	30	38	25	47	102	12	12	50	18
ENSMUSG00000071072	969	1335	1159	1500	809	1140	594	318	1098	667	2120	1110	916	549	241	706	853	2750	778	1589	1201	1325	1178	1062	1823	1305	1267	978
ENSMUSG00000071068	0	2	0	0	0	0	0	0	0	0	0	0	0	0	0	0	0	0	0	0	0	0	0	0	0	0	0	0
ENSMUSG00000071064	118	190	289	330	283	270	117	44	326	78	352	219	136	225	107	235	244	402	289	80	187	362	380	421	350	456	504	178
ENSMUSG00000071042	2	151	0	10	0	12	24	2	74	30	460	220	538	32	22	20	6	2	6	0	6	8	6	4	14	0	32	0
ENSMUSG00000071037	215	209	80	133	68	78	26	10	56	47	78	40	28	40	14	44	85	240	18	108	110	64	40	30	78	138	41	27
ENSMUSG00000071036	0	0	0	0	0	0	0	0	0	0	0	0	0	0	0	0	0	0	0	0	0	0	0	0	0	0	0	0
ENSMUSG00000071019	0	0	0	0	0	0	0	0	0	0	0	0	0	0	0	0	0	0	0	0	0	0	0	0	0	0	0	0
ENSMUSG00000071015	0	24	2	2	0	8	0	0	4	4	12	10	2	0	2	0	2	16	8	0	0	0	4	2	0	0	0	2
ENSMUSG00000071014	750	625	820	773	404	928	614	276	2583	362	1800	1206	553	688	195	418	711	3855	702	816	726	1092	1336	1414	1266	1838	1418	1087
ENSMUSG00000071001	0	0	0	0	0	2	0	0	0	8	84	52	10	2	0	0	0	10	4	0	119	154	104	108	114	116	196	118
ENSMUSG00000070999	0	0	0	4	2	0	0	0	4	0	2	0	0	0	0	58	46	0	14	0	0	4	0	0	0	0	2	0
ENSMUSG00000070990	235	0	0	0	4	4	218	34	66	22	1039	838	135	394	146	0	8	14	2	0	2	50	14	40	58	86	14	16
ENSMUSG00000070983	0	0	0	0	0	0	0	0	0	0	0	0	0	0	0	0	0	0	0	0	0	0	0	0	0	0	0	0
ENSMUSG00000070980	2	0	0	2	0	2	2	2	2	0	4	2	2	2	2	0	0	0	2	0	16	0	0	2	4	0	2	0
ENSMUSG00000070979	0	0	4	4	0	2	28	8	0	0	6	2	0	0	0	0	0	0	16	0	2	0	0	0	0	0	0	0
ENSMUSG00000070972	389	498	412	249	249	362	291	164	352	192	1094	568	308	179	68	184	268	1250	268	377	505	307	265	251	419	538	221	212
ENSMUSG00000070953	84	344	355	377	30	44	157	74	475	321	675	484	244	308	94	89	254	1344	255	526	375	358	440	481	457	444	458	429
ENSMUSG00000070943	0	0	0	0	0	0	2	0	0	0	0	0	0	0	0	0	0	0	0	0	0	0	0	0	0	0	0	0
ENSMUSG00000070942	40	6	2	8	0	0	76	11	10	0	266	170	672	12	12	4	0	3612	126	1191	222	224	256	223	16	6	70	4
ENSMUSG00000070939	161	667	499	465	486	446	312	114	265	48	523	372	293	215	91	216	247	1134	296	350	370	330	334	384	203	284	487	302
ENSMUSG00000070934	1653	3211	1487	1611	833	1302	1025	487	4134	761	4749	2518	1737	957	537	1339	2215	6141	1952	1418	1844	1484	2204	2222	2421	3646	2445	2704
ENSMUSG00000070902	0	0	0	0	0	0	0	0	0	0	0	0	0	0	0	0	0	0	0	0	0	0	0	0	0	0	0	0
ENSMUSG00000070891	0	0	0	0	0	0	0	0	0	0	0	0	0	0	0	0	0	0	0	0	0	0	0	0	0	0	0	0
ENSMUSG00000070883	28	10	14	2	10	12	538	188	4	4	12	10	2	8	2	2	12	61	29	38	54	28	26	29	88	46	28	14
ENSMUSG00000070880	0	0	0	0	4	48	0	0	0	0	0	0	0	0	2	8	12	0	0	0	0	0	0	0	0	0	0	0
ENSMUSG00000070877	4	0	0	0	0	0	0	0	0	0	0	0	0	0	0	0	0	0	0	0	0	0	0	0	2	0	0	0
ENSMUSG00000070875	0	0	0	0	0	0	0	0	0	0	0	0	0	0	0	0	0	0	0	0	0	0	0	0	0	0	0	0
ENSMUSG00000070873	0	0	0	0	0	0	2	2	2	908	0	0	0	0	2	2	0	0	0	0	0	0	0	0	0	0	0	0
ENSMUSG00000070871	237	1143	144	326	665	562	181	126	263	160	394	244	317	137	65	160	93	232	182	90	129	168	90	74	119	106	80	102
ENSMUSG00000070868	0	0	0	0	0	0	0	0	0	0	0	0	0	0	0	0	0	0	0	0	0	0	0	0	0	0	0	0
ENSMUSG00000070867	2938	256	80	49	10	30	2	4	540	78	494	424	107	52	12	583	1393	180	191	300	28	865	128	160	491	2245	114	343
ENSMUSG00000070866	0	0	78	251	0	0	0	0	0	0	0	0	0	0	0	4	12	0	0	0	0	0	0	0	0	0	0	0
ENSMUSG00000070858	74	167	178	414	130	392	200	189	281	4	782	563	338	422	119	138	272	110	262	92	98	205	362	565	117	435	291	246
ENSMUSG00000070837	0	2	24	18	20	12	24	12	2	0	0	0	0	0	0	96	176	0	16	203	50	507	20	36	587	163	26	58
ENSMUSG00000070823	0	0	0	0	0	0	0	0	0	0	0	0	0	0	0	0	0	0	0	0	0	0	0	0	0	0	0	0
ENSMUSG00000070817	0	0	0	0	0	0	0	2	0	0	0	0	2	0	0	0	0	0	0	0	0	0	0	0	0	0	0	0
ENSMUSG00000070815	0	0	0	0	0	0	0	0	0	0	0	0	2	0	0	0	0	0	0	0	0	0	0	0	0	0	0	0
ENSMUSG00000070814	15	75	98	93	277	262	362	194	116	56	150	114	35	56	26	34	110	257	148	182	241	355	500	532	471	510	667	336
ENSMUSG00000070808	164	431	255	446	519	540	309	130	316	302	2061	1932	624	451	270	230	480	2893	863	910	438	764	622	1176	852	1050	879	682
ENSMUSG00000070806	12	26	16	6	6	4	8	6	10	22	160	54	67	0	2	20	52	8	28	18	0	89	6	18	137	58	114	178
ENSMUSG00000070803	0	47	6	20	0	0	0	0	2	168	80	75	24	4	0	0	4	24	12	0	2	0	0	0	2	14	0	4
ENSMUSG00000070802	0	79	195	204	0	0	0	0	0	0	6	2	0	0	0	605	889	118	61	20	2	0	6	2	8	6	4	0
ENSMUSG00000070780	0	2	0	2	10	8	0	2	20	0	6	2	8	16	6	56	48	2	4	0	4	4	0	2	0	10	6	10
ENSMUSG00000070777	0	0	0	0	28	20	0	0	0	0	84	47	58	0	0	0	6	134	0	0	0	0	0	0	0	0	0	0
ENSMUSG00000070738	1041	473	504	818	371	351	927	112	671	354	3895	3392	1167	1113	332	520	534	994	222	350	797	888	938	995	544	905	1720	433
ENSMUSG00000070737	12	14	24	38	72	174	68	42	224	68	394	259	189	182	57	7	56	194	0	20	24	38	76	52	117	144	104	66
ENSMUSG00000070733	268	788	345	735	1042	886	457	137	242	403	738	300	358	455	195	442	317	703	433	384	706	1250	922	504	462	604	1097	392
ENSMUSG00000070732	0	0	0	0	0	12	10	2	12	0	0	0	22	18	12	0	0	10	2	0	0	0	0	0	0	0	0	0
ENSMUSG00000070730	114	330	191	172	226	180	279	211	283	72	698	456	417	199	74	95	182	493	244	309	267	184	219	264	246	284	251	178
ENSMUSG00000070720	420	184	201	176	408	362	56	26	36	58	1087	840	368	229	38	24	74	46	61	44	40	46	30	71	48	128	40	20
ENSMUSG00000070719	0	0	0	0	0	0	0	0	0	0	2	2	0	33	12	0	0	0	16	2	0	2	0	0	0	2	0	4
ENSMUSG00000070708	0	0	0	0	2	2	0	0	0	0	0	0	0	0	0	0	0	0	0	0	0	0	0	0	4	0	0	2
ENSMUSG00000070705	0	0	0	0	0	0	8	2	0	0	0	0	0	0	0	0	2	93	78	66	37	47	50	54	40	76	78	42
ENSMUSG00000070699	231	744	531	556	325	468	112	94	862	199	1125	841	411	586	145	202	472	252	255	495	418	674	525	817	437	987	698	380
ENSMUSG00000070697	407	611	573	413	506	756	339	181	552	326	337	192	152	268	116	461	740	1059	531	991	571	675	1263	1162	1333	1112	998	679
ENSMUSG00000070690	0	0	0	0	0	0	0	0	0	2	0	0	0	0	0	0	0	0	0	0	0	0	0	0	0	0	0	0
ENSMUSG00000070687	0	4	10	14	59	56	197	2	34	0	0	0	0	0	0	6	4	0	4	2	0	2	0	2	0	0	0	0
ENSMUSG00000070683	0	0	0	4	0	0	0	0	0	6	0	0	0	0	0	0	0	0	0	2	2	10	6	6	4	6	8	16
ENSMUSG00000070661	0	0	0	0	0	0	0	0	0	0	0	0	0	0	0	0	4	0	0	0	0	4	2	4	0	2	2	0
ENSMUSG00000070645	0	2	0	0	0	0	0	0	0	0	0	0	0	0	0	0	0	0	0	0	0	0	0	0	0	0	0	0
ENSMUSG00000070644	0	80	22	16	26	40	72	52	164	40	160	153	117	68	26	32	57	4	8	0	0	123	18	25	44	66	40	24
ENSMUSG00000070643	50	594	134	120	180	236	52	62	14	70	739	593	264	446	156	76	154	62	162	22	30	215	165	224	208	275	235	178
ENSMUSG00000070639	12	42	50	44	144	88	50	30	116	70	45	32	54	2	0	76	45	28	56	144	183	205	175	140	110	157	106	92
ENSMUSG00000070637	0	0	0	0	0	0	0	0	0	0	0	0	0	0	0	2	0	6	2	0	0	0	0	0	0	0	0	0
ENSMUSG00000070632	8	8	4	4	10	12	8	2	6	0	10	10	2	16	2	2	0	8	2	2	2	12	12	2	14	12	50	8
ENSMUSG00000070609	0	0	0	0	0	0	0	0	0	0	0	0	0	0	0	6	6	0	0	0	0	0	0	0	0	0	0	0
ENSMUSG00000070604	8	2	10	17	115	102	2	0	6	2	14	8	15	12	8	0	0	24	0	6	12	24	10	18	39	60	24	15
ENSMUSG00000070583	0	0	0	0	0	0	4	2	4	0	8	0	4	0	0	0	0	18	4	6	56	97	125	100	82	86	163	60
ENSMUSG00000070577	0	0	0	0	0	0	0	0	0	0	0	0	0	0	0	0	0	0	0	0	0	0	0	0	0	0	0	0
ENSMUSG00000070576	38	224	222	72	721	358	42	24	10	56	560	442	355	50	24	36	24	70	321	136	152	1030	1452	2190	654	343	2995	545
ENSMUSG00000070574	0	0	0	0	0	0	0	0	0	0	0	0	0	0	0	0	0	0	0	0	0	0	0	0	0	0	0	0
ENSMUSG00000070570	103	61	137	394	1342	883	102	22	242	24	12	24	24	8	0	110	154	2	4	8	8	4	0	0	0	0	0	0
ENSMUSG00000070568	0	2	64	0	0	0	0	0	0	0	0	0	0	2	0	2	0	2	12	2	0	0	0	0	0	0	0	0
ENSMUSG00000070565	588	429	382	639	590	865	230	66	94	417	220	120	273	597	205	166	92	555	130	255	459	448	245	102	180	446	356	165
ENSMUSG00000070564	0	0	2	0	0	0	0	2	44	0	2	0	2	0	0	0	0	0	0	0	0	0	2	2	0	0	0	0
ENSMUSG00000070563	0	0	0	0	0	0	0	0	0	0	0	0	2	0	0	0	0	0	0	0	0	0	0	0	0	0	0	0
ENSMUSG00000070552	0	0	2	2	0	0	0	0	0	0	0	0	0	0	0	0	0	0	0	0	0	0	0	0	0	2	0	0
ENSMUSG00000070551	0	0	0	0	0	0	0	0	0	0	0	0	0	0	0	0	0	0	0	0	0	0	0	0	0	0	0	0
ENSMUSG00000070546	0	0	0	0	0	0	0	0	0	0	0	0	0	0	0	0	0	0	0	0	0	0	0	0	0	0	4	0
ENSMUSG00000070544	913	1659	1323	1414	567	546	498	200	858	653	1269	584	567	830	498	624	711	1193	1062	764	1150	937	1365	1212	1118	1333	1457	830
ENSMUSG00000070533	0	0	0	0	0	0	0	0	0	0	0	0	0	0	0	0	0	0	0	0	0	0	0	0	0	0	0	0
ENSMUSG00000070532	0	2	0	0	0	0	0	0	0	0	368	207	14	18	0	0	0	0	0	0	0	6	0	0	8	10	18	10
ENSMUSG00000070531	0	0	0	0	0	0	0	0	0	12	0	0	0	0	0	0	0	0	0	0	0	0	0	0	0	0	0	0
ENSMUSG00000070530	0	0	0	0	0	0	0	0	0	0	0	0	0	0	0	0	0	0	0	0	0	0	0	0	0	0	0	0
ENSMUSG00000070529	0	0	0	0	0	0	0	0	0	0	0	0	0	0	0	0	0	0	2	0	0	0	0	0	0	0	0	0
ENSMUSG00000070527	545	465	176	199	0	0	551	298	0	303	1324	760	489	387	219	305	571	58	174	206	269	0	8	20	8	4	38	6
ENSMUSG00000070526	12	6	14	6	6	2	44	10	12	12	136	77	16	54	16	2	4	138	26	73	20	65	126	196	54	94	116	57
ENSMUSG00000070524	0	0	2	6	0	0	14	4	8	0	0	0	2	0	0	0	0	0	32	0	250	115	28	12	22	182	44	30
ENSMUSG00000070520	237	321	284	246	194	225	298	123	218	194	906	480	364	211	86	260	444	786	442	419	292	391	649	547	766	696	730	525
ENSMUSG00000070511	0	0	0	0	0	0	0	0	0	0	0	0	0	0	0	0	0	0	0	0	0	0	0	0	0	0	0	0
ENSMUSG00000070509	150	312	843	387	317	604	189	52	320	58	1255	991	207	86	59	4	68	2340	186	1032	102	964	1194	1964	1147	1120	2373	1037
ENSMUSG00000070504	0	0	0	0	0	0	0	0	0	0	0	0	0	0	0	0	0	0	0	0	0	0	0	0	0	0	0	0
ENSMUSG00000070498	469	10	2	10	6	2	0	0	4	0	63	42	14	0	0	2	0	2	0	0	0	0	0	0	0	4	4	2
ENSMUSG00000070495	0	0	0	0	0	0	0	0	0	0	0	0	0	0	0	0	0	2	0	0	0	0	0	0	0	0	0	0
ENSMUSG00000070476	0	29	8	14	20	14	2	0	16	22	98	62	52	38	16	186	192	38	20	64	18	36	16	25	6	24	20	14
ENSMUSG00000070473	2	6	6	16	11	10	187	46	4	41	146	124	61	40	20	0	0	0	0	0	0	0	0	0	0	0	0	2
ENSMUSG00000070471	0	2	0	0	4	4	0	0	0	0	0	0	6	0	4	0	0	0	0	6	2	8	0	0	4	0	2	6
ENSMUSG00000070469	366	2626	621	1966	200	199	212	42	14	0	1869	1066	378	44	50	147	372	0	1255	773	187	1095	641	494	723	222	678	641
ENSMUSG00000070464	0	0	0	0	0	0	0	0	0	0	0	0	0	0	0	0	0	0	0	0	0	0	0	2	0	2	0	0
ENSMUSG00000070462	828	551	731	832	299	314	177	99	460	170	568	460	379	477	199	103	205	730	233	444	296	421	229	421	507	392	285	213
ENSMUSG00000070436	34313	12225	19621	25707	16614	15628	14086	10447	75971	12107	58753	44315	31594	29328	10110	14357	30146	70136	11790	37335	57653	32625	14792	21583	32463	70620	21025	11274
ENSMUSG00000070427	0	79	36	53	16	66	12	8	26	4	68	24	20	10	2	314	716	116	371	59	14	39	42	45	60	68	52	102
ENSMUSG00000070426	500	546	369	507	350	418	438	215	950	140	873	631	479	182	58	348	443	752	335	757	347	644	576	618	841	925	544	544
ENSMUSG00000070424	0	0	1478	0	0	0	0	0	2	0	0	0	6	0	0	6	2	0	2	0	0	0	2	0	2	0	0	96
ENSMUSG00000070394	370	899	826	638	136	332	438	271	262	455	2217	1869	927	348	123	340	1004	1342	305	480	470	310	393	472	474	586	453	603
ENSMUSG00000070388	0	0	0	0	0	0	20	8	0	0	26	4	18	10	28	0	0	0	2	0	60	6	0	0	2	0	0	9
ENSMUSG00000070375	0	2	0	0	0	0	0	0	0	0	0	0	0	0	0	0	0	0	2	0	0	0	0	0	0	0	0	0
ENSMUSG00000070371	22	6	10	0	0	4	2	6	30	0	16	8	2	8	4	0	2	14	16	30	18	40	46	80	76	44	43	91
ENSMUSG00000070368	0	0	0	0	0	0	0	0	0	0	0	0	0	0	0	0	0	0	0	0	0	0	0	2	0	0	0	0
ENSMUSG00000070366	4	8	2	0	10	30	0	0	4	0	0	0	0	0	0	0	0	0	0	0	0	0	0	0	0	0	2	0
ENSMUSG00000070357	0	0	0	0	0	4	0	0	0	0	0	0	0	0	0	0	0	0	0	0	0	0	0	0	0	0	2	0
ENSMUSG00000070348	3947	1297	1461	833	702	440	281	74	652	451	9286	6238	4108	1849	714	2754	2244	279	6983	938	276	6118	3595	3306	6889	5285	6178	4712
ENSMUSG00000070345	0	0	0	2	0	0	0	0	0	4	0	0	0	4	0	0	0	0	0	0	6	2	0	0	4	0	6	6
ENSMUSG00000070337	0	2	0	0	10	12	0	0	2	0	0	0	0	0	0	6	8	0	2	10	0	0	0	8	2	30	6	2
ENSMUSG00000070336	8	14	0	0	0	0	0	0	12	0	0	0	0	0	0	0	0	0	0	0	8	24	30	10	10	38	48	24
ENSMUSG00000070335	0	0	0	0	0	0	0	0	0	0	0	0	0	0	0	0	0	0	0	0	0	0	0	0	0	0	0	0
ENSMUSG00000070332	0	10	0	0	0	0	0	0	0	0	2	0	0	0	0	0	0	0	0	0	0	2	0	0	2	22	0	0
ENSMUSG00000070331	20	20	12	2	0	4	1	2	0	10	7	0	0	6	0	2	6	0	0	8	0	0	0	0	0	0	0	3
ENSMUSG00000070330	0	0	0	0	0	0	0	0	0	12	0	0	0	0	0	0	2	0	2	0	0	0	0	0	0	2	0	0
ENSMUSG00000070327	836	2181	425	581	254	174	7903	1396	104	186	3926	2441	1549	986	888	194	190	472	586	502	583	528	342	168	184	190	665	204
ENSMUSG00000070319	1953	6082	3933	4002	3136	5794	3985	2096	10914	4665	9815	7216	4051	4003	1138	1499	3843	6460	1593	2515	2514	4434	3765	4616	4396	6743	4343	3213
ENSMUSG00000070313	0	0	0	0	0	0	0	0	0	0	0	0	0	0	0	0	0	0	0	0	0	0	0	0	0	0	0	0
ENSMUSG00000070306	0	134	2	20	136	242	10	12	102	0	2	2	0	0	0	0	2	56	18	0	0	0	0	0	0	0	0	0
ENSMUSG00000070305	6	0	0	0	29	32	10	6	12	0	10	2	2	4	4	8	10	32	6	8	0	16	6	12	12	28	8	14
ENSMUSG00000070304	0	0	0	0	24	8	26	10	12	2	417	278	56	24	2	2	4	0	12	0	0	0	0	0	0	0	0	0
ENSMUSG00000070298	4	0	0	0	0	0	0	0	0	0	0	0	2	0	0	2	0	4	0	0	0	0	0	0	0	0	0	2
ENSMUSG00000070291	0	0	0	0	0	4	12	4	4	0	0	0	0	0	2	0	0	0	2	0	2	0	0	0	0	0	0	0
ENSMUSG00000070287	2	2	0	2	16	6	12	6	8	2	0	0	0	0	0	4	14	70	0	2	4	2	8	6	14	66	18	4
ENSMUSG00000070284	361	926	1316	1293	555	535	612	395	6508	156	844	613	404	595	192	243	460	1120	215	519	319	549	407	503	709	1808	599	406
ENSMUSG00000070283	627	1658	726	1075	156	381	868	412	1076	101	1302	730	374	372	97	232	484	450	316	443	564	760	778	1159	767	1080	1008	652
ENSMUSG00000070280	0	126	0	0	0	4	0	0	0	0	0	0	0	0	0	0	0	0	0	0	0	0	0	0	0	2	0	2
ENSMUSG00000070056	429	114	245	188	523	280	140	58	70	32	314	248	148	205	79	181	149	468	298	1164	405	361	255	314	236	383	256	164
ENSMUSG00000070047	4234	9930	8492	22845	9131	8090	7190	3826	4598	1727	25954	12511	14413	5495	1869	6850	5627	19427	5706	9163	9885	19662	18319	15024	9601	13572	23235	7662
ENSMUSG00000070044	664	192	251	229	323	347	501	302	240	271	1458	740	608	275	92	444	635	1088	589	252	673	1129	666	530	677	594	633	1103
ENSMUSG00000070023	0	0	0	0	0	0	0	0	0	0	0	0	0	0	0	0	0	0	0	0	0	0	0	0	0	0	0	0
ENSMUSG00000070003	3099	830	1120	935	770	1644	1107	408	1676	743	3069	2425	1213	1902	419	215	715	2569	416	762	155	394	516	833	433	814	559	635
ENSMUSG00000070002	304	1048	415	390	501	811	877	281	332	308	1133	827	609	833	363	217	417	1195	412	697	616	1066	977	1534	1171	1614	1610	946
ENSMUSG00000070000	4	0	0	0	0	2	2	0	26	2	24	18	28	12	14	22	24	42	21	4	6	111	328	575	20	69	571	6
ENSMUSG00000069998	0	0	0	0	0	0	0	0	0	2	0	0	0	0	0	0	0	0	0	0	0	0	0	0	0	0	0	0
ENSMUSG00000069971	0	0	0	0	0	0	0	0	0	0	0	0	0	0	0	0	0	0	0	0	0	0	0	0	0	0	0	0
ENSMUSG00000069922	0	0	0	0	0	2	4	0	0	0	6	0	0	0	0	20	52	814	16	0	0	0	0	0	0	0	0	0
ENSMUSG00000069920	327	267	86	99	14	16	410	179	431	125	2010	1279	831	662	214	53	121	1060	66	130	75	503	149	221	493	1601	22	371
ENSMUSG00000069919	114	199	85	94	9	22	116	10	113	2	18	20	14	6	0	4	6	10	4	8	433	30	0	0	4	18	2	12
ENSMUSG00000069911	0	4	2	2	0	0	0	0	0	0	0	0	0	0	0	0	0	0	0	0	0	0	0	0	0	0	0	2
ENSMUSG00000069910	34	64	911	861	88	80	20	14	116	42	366	209	102	111	22	122	177	18	82	90	46	337	37	40	401	84	46	48
ENSMUSG00000069895	290	456	214	279	347	156	234	58	72	90	454	384	476	330	141	175	116	356	154	127	230	554	300	192	177	218	485	152
ENSMUSG00000069873	0	0	0	0	6	12	10	0	0	0	0	0	0	0	0	0	0	0	0	0	0	0	0	0	0	4	0	0
ENSMUSG00000069867	634	0	2	0	0	0	0	0	0	536	1662	968	391	567	146	301	869	1157	571	859	458	0	0	0	0	0	0	0
ENSMUSG00000069855	0	0	0	0	0	0	0	0	2	0	2	0	2	90	31	0	0	0	0	2	0	0	0	2	2	0	0	0
ENSMUSG00000069844	66	410	184	138	246	280	90	50	197	105	338	187	174	114	70	218	362	309	153	154	238	334	480	487	304	357	390	274
ENSMUSG00000069835	167	370	338	286	136	227	26	2	295	383	1884	1292	749	528	228	77	139	470	36	247	217	74	117	146	202	336	123	142
ENSMUSG00000069833	49130	42611	23498	34183	30496	20668	16279	7002	23971	13574	74572	40635	15506	11625	5519	14696	18279	55641	36387	42411	19096	29480	34607	26567	23938	20641	33007	24714
ENSMUSG00000069825	0	0	0	0	14	152	0	0	2	0	0	0	0	6	4	0	0	0	2	0	2	0	0	2	0	50	0	0
ENSMUSG00000069814	0	0	0	0	0	2	0	0	6	0	6	20	12	10	0	0	2	6	2	0	4	12	8	20	24	30	4	32
ENSMUSG00000069808	300	423	100	134	342	181	36	34	242	72	352	221	160	199	94	82	133	416	254	250	167	358	222	249	238	246	263	158
ENSMUSG00000069805	0	2	2	2	0	0	0	0	0	0	6	2	2	0	0	6	0	0	135	0	0	4	0	2	2	0	4	2
ENSMUSG00000069804	0	0	0	0	0	0	0	0	0	0	0	0	0	0	0	0	0	2	0	0	0	2	0	0	0	0	0	0
ENSMUSG00000069793	0	18	182	168	0	0	12	0	16	0	122	78	198	44	6	12	2	26	16	0	2	8	0	2	40	6	2	8
ENSMUSG00000069792	0	0	4	4	0	0	0	0	0	0	0	0	0	0	0	0	0	0	0	0	0	0	0	0	0	0	0	4
ENSMUSG00000069763	219	12	22	8	44	14	0	2	62	4	2	0	0	6	4	2	11	22	62	0	0	44	10	2	115	18	0	86
ENSMUSG00000069744	1379	3463	2896	3334	2272	4569	1519	999	7615	1269	4798	3390	2260	1748	569	861	1563	5964	2097	3251	1762	2487	3258	3792	3116	3126	3320	1577
ENSMUSG00000069733	0	0	0	2	0	2	24	25	14	0	0	0	2	0	0	0	0	0	0	0	0	0	0	0	0	0	0	0
ENSMUSG00000069729	1497	1628	790	942	1145	1000	432	262	580	528	1597	867	480	629	302	705	814	1822	936	685	953	1083	1859	1746	838	1090	2863	1052
ENSMUSG00000069713	0	0	0	0	0	0	0	0	0	0	0	0	0	0	0	0	0	4	0	0	0	2	0	0	4	16	4	0
ENSMUSG00000069708	0	2	0	0	0	0	0	0	0	0	0	0	0	0	0	0	0	0	0	0	0	0	0	0	0	0	0	0
ENSMUSG00000069707	0	0	0	0	0	0	0	0	0	0	0	0	0	0	0	0	0	0	0	2	0	0	0	0	0	0	0	0
ENSMUSG00000069706	0	0	0	0	0	0	0	0	0	0	0	0	0	0	0	0	0	0	0	0	0	0	0	0	0	0	0	0
ENSMUSG00000069678	256	212	123	171	126	191	191	74	165	78	370	270	100	110	20	87	192	342	112	247	151	165	224	219	190	223	200	167
ENSMUSG00000069670	0	10	0	0	0	0	0	0	6	0	0	0	0	12	18	0	0	4	0	0	0	0	0	0	0	0	0	0
ENSMUSG00000069662	5388	1769	358	814	142	316	99	86	457	723	2241	1412	781	1933	571	199	524	821	442	1863	521	709	1096	1346	978	598	3889	1729
ENSMUSG00000069633	6	95	48	48	113	231	174	130	338	97	329	269	84	149	42	57	142	422	44	150	60	279	311	431	245	628	627	140
ENSMUSG00000069631	1462	995	366	546	491	552	301	116	672	223	820	553	548	496	193	446	412	772	480	700	264	670	688	933	566	720	1023	482
ENSMUSG00000069622	362	222	360	387	563	740	608	531	1033	384	1283	760	536	307	132	284	468	2073	893	1479	791	861	774	703	1100	1081	795	735
ENSMUSG00000069601	6	71	36	26	30	24	42	14	0	12	0	0	0	34	16	481	85	362	2	18	2	14	36	44	18	2	10	0
ENSMUSG00000069588	0	0	0	0	0	0	0	0	0	0	0	0	0	0	0	0	0	0	0	0	0	0	0	0	0	0	0	0
ENSMUSG00000069581	0	0	0	0	0	0	6	0	2	0	4	0	0	4	6	0	0	0	0	2	0	0	2	0	0	0	0	0
ENSMUSG00000069565	722	1142	1787	1810	1149	1619	550	245	2318	1193	4360	2969	1939	2061	357	722	1181	3143	968	1838	1125	1981	1215	1379	2645	2518	1352	1136
ENSMUSG00000069539	398	589	447	604	586	460	279	120	262	251	730	390	315	370	196	331	331	668	455	305	422	825	998	848	890	725	1408	534
ENSMUSG00000069520	820	170	88	135	137	137	618	182	196	106	428	223	210	135	72	218	366	624	184	112	283	354	315	268	293	348	386	348
ENSMUSG00000069516	0	74	0	0	2	0	0	0	0	0	8	2	2	0	0	0	0	4	2	2	0	2	0	0	0	0	2	0
ENSMUSG00000069495	255	444	238	306	318	282	166	40	214	143	550	272	173	212	80	231	251	574	264	251	304	362	505	370	414	423	512	271
ENSMUSG00000069430	2	2	0	0	0	0	0	0	0	0	0	0	0	0	0	0	0	0	0	0	0	0	0	0	0	0	0	0
ENSMUSG00000069385	0	0	0	0	0	0	0	0	0	0	0	0	0	0	0	0	0	0	0	0	0	0	0	0	0	0	0	0
ENSMUSG00000069378	46	80	4	2	0	0	50	96	70	4	38	32	77	40	22	0	2	32	24	99	0	34	2	0	4	102	0	8
ENSMUSG00000069372	0	0	0	0	0	0	0	0	0	7	444	222	85	134	84	2	0	82	0	0	0	17	0	0	2	16	0	2
ENSMUSG00000069259	0	0	0	0	0	0	0	0	0	0	0	0	0	0	0	0	0	18	0	0	0	0	0	0	0	0	0	0
ENSMUSG00000069258	0	0	0	0	0	0	0	0	0	0	0	0	0	0	0	0	0	0	0	0	0	0	0	0	0	0	0	0
ENSMUSG00000069255	22	221	165	195	162	143	38	4	586	26	624	418	105	16	12	121	138	88	162	151	31	12	62	36	90	69	64	18
ENSMUSG00000069237	94	144	104	126	62	102	120	36	114	42	461	244	148	70	24	272	281	336	155	307	170	232	223	143	196	234	280	136
ENSMUSG00000069227	0	20	2	6	22	22	0	0	0	0	10	6	4	6	2	56	56	0	12	48	4	12	6	6	10	2	0	4
ENSMUSG00000069189	0	2	0	0	2	0	0	0	0	0	0	0	0	0	0	0	0	0	0	0	0	2	0	0	2	2	0	2
ENSMUSG00000069171	270	293	507	619	1356	1974	614	304	255	246	550	258	381	158	73	34	78	152	258	165	132	16	72	74	53	10	65	72
ENSMUSG00000069170	0	4	4	8	337	422	106	18	16	0	4	0	0	4	2	6	0	12	10	0	2	0	0	0	2	0	0	0
ENSMUSG00000069135	99	331	153	116	68	52	42	8	66	110	257	116	56	108	46	120	163	182	62	38	90	71	98	59	181	109	112	104
ENSMUSG00000069132	44	0	0	0	0	0	0	0	4	0	0	0	0	0	0	0	0	0	0	0	0	0	0	0	0	0	0	0
ENSMUSG00000069118	0	0	0	0	0	0	0	0	0	0	0	0	0	0	0	0	0	0	0	0	0	0	0	0	0	0	0	0
ENSMUSG00000069114	62	260	114	192	194	182	114	42	175	54	210	108	106	88	16	105	114	82	64	94	94	251	216	170	219	230	290	179
ENSMUSG00000069094	30	142	151	123	48	44	210	53	58	41	77	43	38	27	12	18	36	73	125	56	152	216	324	246	197	547	338	230
ENSMUSG00000069089	300	576	411	426	278	484	525	152	325	254	564	292	143	189	83	184	252	1179	700	695	811	994	1121	1078	1332	1628	1068	1202
ENSMUSG00000069085	0	0	0	0	0	0	0	0	0	0	0	0	0	0	0	0	0	0	0	0	0	0	0	0	0	0	0	0
ENSMUSG00000069080	0	0	0	0	0	0	0	0	0	0	0	0	0	0	0	0	0	0	0	0	0	0	0	0	0	0	0	0
ENSMUSG00000069072	0	0	0	0	0	0	0	0	0	0	0	0	0	0	0	0	0	0	0	0	0	0	0	0	0	0	0	0
ENSMUSG00000069053	11966	17297	11691	13332	7059	8172	5687	2631	11854	6171	32342	27047	10557	13212	4706	8307	13088	18666	7024	9399	8687	15078	10361	11105	10595	15591	11145	7362
ENSMUSG00000069049	1747	3379	3265	3456	2070	1132	1319	714	1428	1031	4704	2471	1149	1795	794	2515	3795	3116	677	2101	2592	1922	1279	1060	2083	1998	1565	1304
ENSMUSG00000069044	1580	7539	2802	5645	2570	5730	1833	814	1185	3477	12683	5850	6006	6249	4148	1953	2013	3110	847	1391	1593	1698	1311	896	1161	1800	1557	1122
ENSMUSG00000069041	0	2	2	4	0	2	30	24	0	4	2	0	4	0	0	0	0	0	0	0	0	2	4	2	2	0	2	0
ENSMUSG00000069036	0	0	0	0	0	0	0	0	0	0	0	0	0	0	0	0	0	0	0	0	0	0	0	0	0	0	0	0
ENSMUSG00000069020	202	272	275	339	84	132	200	131	619	118	680	550	297	298	68	132	190	433	84	303	167	404	260	333	272	600	266	209
ENSMUSG00000068966	48	70	12	40	26	20	72	16	28	12	67	22	30	63	31	54	60	128	18	32	40	42	62	32	30	38	62	28
ENSMUSG00000068947	0	0	0	0	0	0	0	0	0	0	2	0	0	0	0	0	0	0	0	0	0	0	0	0	0	0	0	0
ENSMUSG00000068923	82	2	56	37	334	192	96	50	68	36	550	386	322	274	140	256	194	170	31	254	249	239	395	404	153	97	408	76
ENSMUSG00000068921	935	1100	1197	1149	199	272	1128	397	592	265	740	416	300	510	277	641	1317	1549	2020	1715	1497	2330	2156	2698	2593	2763	2892	1949
ENSMUSG00000068917	875	569	308	397	486	475	924	324	489	404	2281	1105	533	507	128	185	617	1436	817	680	562	564	686	701	819	840	898	748
ENSMUSG00000068882	1195	1728	2441	1774	1274	2389	682	410	1090	954	2208	1550	986	1286	361	649	632	3465	1150	2090	1485	1569	2092	1956	2467	2191	2125	1489
ENSMUSG00000068877	3295	2129	736	937	151	162	68	28	6	47	164	114	24	26	10	2	18	36	1884	14	4	27	4	4	24	203	18	58
ENSMUSG00000068876	0	152	22	6	10	2	1049	794	6	0	2	2	8	0	0	34	38	0	4	6	12	0	0	0	0	0	0	0
ENSMUSG00000068860	2	0	52	8	4	4	32	13	6	0	0	2	0	0	0	0	10	0	6	0	0	0	6	8	0	0	0	2
ENSMUSG00000068856	1426	2571	2381	2175	1391	2185	1259	600	3276	1018	4257	2893	1904	2572	907	1004	1741	3054	1454	2953	1476	2524	3138	4774	2900	2979	3701	1810
ENSMUSG00000068823	4086	8030	4830	4973	7301	7883	3597	1753	6011	3098	13742	6750	4042	4085	2075	5141	6746	6639	3634	4169	3767	4100	4023	3443	4516	4859	4085	3077
ENSMUSG00000068817	0	0	0	0	0	0	0	0	0	0	0	0	0	0	0	0	0	0	0	0	0	0	0	0	0	0	0	0
ENSMUSG00000068816	0	0	0	0	0	0	0	0	0	0	0	0	0	0	0	0	0	0	0	0	0	0	0	0	0	0	0	0
ENSMUSG00000068798	539	732	428	497	642	886	450	229	512	466	1092	622	266	459	267	621	692	1455	483	711	533	470	573	493	820	954	671	505
ENSMUSG00000068794	0	14	0	0	0	6	0	0	0	0	0	0	0	6	2	0	0	8	12	2	2	0	0	2	15	0	6	0
ENSMUSG00000068758	0	0	0	2	0	0	0	0	0	0	0	0	0	0	0	0	0	6	0	2	0	0	2	0	0	0	0	0
ENSMUSG00000068749	710	1703	1735	1606	546	839	812	360	1528	649	1958	1192	882	689	288	572	786	2233	980	1470	1001	1264	1011	1034	1492	1529	904	1122
ENSMUSG00000068748	0	0	0	0	110	34	22	26	0	2	200	94	2	93	32	40	14	2	34	106	2	0	2	2	2	2	4	6
ENSMUSG00000068747	2495	702	275	577	69	100	1314	519	30	187	2031	1266	1335	248	170	1119	755	92	28	798	8	120	448	406	62	194	691	54
ENSMUSG00000068745	0	0	0	0	0	4	205	92	0	0	22	20	10	10	0	0	0	0	0	0	0	0	0	0	0	4	0	0
ENSMUSG00000068744	0	14	151	140	40	61	282	117	74	20	240	116	78	210	22	63	97	12	46	20	16	187	458	737	298	94	875	144
ENSMUSG00000068742	166	184	131	160	840	801	189	114	408	291	654	704	486	226	94	275	266	887	324	1334	317	471	381	501	324	351	492	322
ENSMUSG00000068740	1579	154	56	128	104	134	612	132	51	64	2548	2345	922	170	45	437	461	54	312	10	6	6	30	64	8	8	48	2
ENSMUSG00000068739	2993	9608	4503	4664	4437	5259	4782	2654	21840	3315	13628	9510	7301	4859	1265	2750	6023	19234	2481	7560	7101	9604	5741	7500	8408	14644	6692	5221
ENSMUSG00000068735	0	22	66	36	6	14	58	4	4	27	26	28	84	16	4	6	6	752	830	23	87	547	2459	3164	714	673	4675	276
ENSMUSG00000068732	145	105	64	72	58	56	60	40	84	31	256	130	108	57	40	43	40	338	225	167	161	149	128	133	183	289	189	167
ENSMUSG00000068699	728	21463	5798	9953	6987	6573	8293	7009	10383	4906	8539	8521	7241	9489	8969	24714	13515	41133	4660	4230	14806	7830	480	718	7845	3454	726	3216
ENSMUSG00000068697	2	0	0	2	2	6	2	2	2	0	0	2	2	4	0	6	24	0	0	6	6	8	47	68	6	249	134	74
ENSMUSG00000068696	0	0	2	2	0	0	0	2	0	0	8	4	0	0	0	0	2	0	2	2	14	4	104	151	45	581	38	77
ENSMUSG00000068686	0	0	0	0	0	0	0	0	0	0	0	0	0	0	0	0	0	1430	337	389	66	55	904	847	78	226	1338	119
ENSMUSG00000068663	479	405	417	410	426	258	299	128	412	483	2545	1775	1083	800	320	532	661	805	268	370	330	734	664	699	553	803	1019	475
ENSMUSG00000068617	0	0	0	0	4	2	0	0	0	4	12	4	0	0	0	2	0	2	0	0	0	0	0	0	0	0	0	0
ENSMUSG00000068615	0	0	0	0	0	0	0	0	0	0	0	0	0	0	6	0	2	0	0	0	0	0	0	0	0	0	0	0
ENSMUSG00000068606	0	0	0	0	4	6	20	24	0	0	10	4	2	0	0	34	20	0	12	0	0	4	0	0	0	0	2	6
ENSMUSG00000068601	0	0	0	0	0	0	0	0	0	0	0	0	0	0	0	0	0	0	0	0	0	0	0	0	0	0	0	0
ENSMUSG00000068600	0	0	0	0	0	0	0	0	0	0	0	0	0	0	0	0	0	0	0	0	0	0	0	0	0	0	0	0
ENSMUSG00000068587	0	0	0	0	44	16	16	2	6	0	0	0	0	2	0	0	0	0	2	0	0	0	0	0	0	0	0	0
ENSMUSG00000068580	73	198	182	159	175	304	109	83	430	159	454	358	200	176	29	167	285	432	272	406	100	266	347	419	310	477	454	404
ENSMUSG00000068551	4	6	14	8	10	16	154	12	17	2	208	154	76	54	8	38	186	298	270	48	31	38	44	44	74	180	88	96
ENSMUSG00000068536	0	2	2	2	0	0	0	0	0	0	0	0	0	0	0	0	0	0	0	0	0	0	0	0	0	0	0	0
ENSMUSG00000068523	284	514	449	537	217	955	385	259	1086	160	1226	742	262	279	79	549	675	2055	442	392	255	792	651	800	942	1455	638	635
ENSMUSG00000068522	0	0	0	0	0	0	0	0	0	0	0	0	0	0	0	0	0	0	22	2	0	2	12	6	94	4	4	35
ENSMUSG00000068479	626	1126	584	623	408	490	853	332	710	379	964	516	406	303	152	495	693	704	492	559	476	473	867	781	718	692	773	700
ENSMUSG00000068428	0	0	0	0	0	0	0	0	0	0	0	0	0	0	0	0	0	0	0	0	0	0	0	0	0	0	0	0
ENSMUSG00000068417	16826	162	701	568	5801	6618	1886	357	1668	1277	558	316	126	200	38	757	827	5282	1635	986	1110	4336	1998	2024	3086	6781	2369	2992
ENSMUSG00000068407	0	0	8	2	0	0	0	0	0	0	0	0	0	0	0	0	0	0	0	0	0	0	0	0	0	0	0	0
ENSMUSG00000068394	12	30	16	28	58	68	16	6	58	12	378	172	187	58	24	34	48	80	82	133	90	96	48	48	144	84	90	38
ENSMUSG00000068392	0	0	0	0	0	0	2	0	0	0	2	6	0	0	0	0	0	0	0	2	0	0	0	0	0	0	0	0
ENSMUSG00000068391	250	108	403	298	108	144	27	28	168	62	168	142	34	36	4	67	122	258	131	206	100	282	344	517	270	380	328	184
ENSMUSG00000068373	0	14	36	18	94	60	235	82	0	0	0	0	2	4	18	333	368	0	0	0	0	0	0	2	0	0	0	0
ENSMUSG00000068341	0	0	0	0	0	0	0	0	0	0	0	0	0	0	0	0	0	0	0	0	0	0	0	0	0	0	0	0
ENSMUSG00000068335	754	1014	216	179	1119	1920	2350	897	332	248	2953	1965	1010	680	107	601	1589	1288	305	676	546	1949	1047	1459	1597	2583	912	1255
ENSMUSG00000068329	342	597	515	523	374	536	459	138	332	224	1626	1023	580	583	158	638	1277	602	459	529	463	673	584	718	777	1125	494	474
ENSMUSG00000068328	2300	1925	2173	2014	2634	4151	2583	1338	6767	1654	8601	6688	4026	3900	824	1063	2210	5341	2066	3531	1843	2871	3258	5144	2897	4127	3676	2405
ENSMUSG00000068327	0	8	0	2	24	38	100	96	0	18	10	10	2	0	2	2	0	0	0	0	4	2	0	0	0	0	0	0
ENSMUSG00000068323	0	4	0	0	6	10	48	16	0	10	6	2	2	0	0	14	6	4	4	0	0	2	4	2	1	0	0	2
ENSMUSG00000068314	0	0	0	0	0	0	0	0	0	0	0	0	0	0	0	0	0	0	0	0	0	0	0	0	0	0	0	0
ENSMUSG00000068302	0	0	0	0	10	24	0	0	0	6	0	0	0	0	0	0	0	0	4	0	0	0	2	0	0	0	0	0
ENSMUSG00000068290	1432	989	960	777	605	842	859	567	1783	444	788	488	335	637	150	573	1040	3149	1240	1232	1471	1787	1889	2029	1786	2967	2369	1513
ENSMUSG00000068284	38	235	12	135	60	34	58	32	70	20	46	14	42	42	16	203	135	60	58	20	72	173	92	50	36	138	182	52
ENSMUSG00000068270	12	56	40	74	32	10	14	0	6	29	78	40	54	84	26	78	60	10	20	36	252	92	50	10	36	42	36	8
ENSMUSG00000068267	3875	6613	4672	3996	3348	4928	2359	1537	3368	875	3857	3506	1798	2867	758	928	1330	10733	3727	6170	2371	4845	5721	9118	5177	5814	6367	3819
ENSMUSG00000068264	83	71	79	28	116	158	106	94	261	32	260	202	123	94	18	46	140	133	30	103	65	176	131	228	132	248	223	97
ENSMUSG00000068263	0	0	0	0	4	0	0	0	28	0	2	0	0	0	0	0	0	0	0	0	0	0	0	0	0	2	2	0
ENSMUSG00000068250	28	83	121	87	34	68	993	248	171	26	450	238	124	165	58	74	60	102	75	509	18	280	348	298	280	628	413	298
ENSMUSG00000068246	0	15	18	10	0	0	0	0	2	0	0	0	0	0	0	0	0	44	2	2	2	8	2	0	0	0	0	0
ENSMUSG00000068227	0	4	0	4	0	2	10	2	8	0	2	2	0	0	0	0	0	0	2	0	2	0	0	0	0	0	0	0
ENSMUSG00000068220	27055	34784	13639	25421	21848	45767	10285	5778	93361	16626	63588	47575	25717	35729	8393	15677	32445	54596	11890	26071	22014	25527	11647	15058	25609	12332	9709	8267
ENSMUSG00000068205	8	0	0	0	10	12	4	2	2	6	14	5	6	6	6	4	4	19	4	0	10	4	19	26	8	8	11	2
ENSMUSG00000068196	1584	2197	86	58	9832	13074	1026	562	3523	253	6819	3702	6863	4293	4601	6891	6151	2660	2138	2909	219	863	1246	1075	604	194	410	3761
ENSMUSG00000068184	20	287	297	264	51	108	230	211	90	64	206	120	109	173	48	156	229	628	208	175	40	284	262	327	402	610	228	398
ENSMUSG00000068167	0	2	0	0	0	0	0	0	0	0	0	2	0	0	0	0	0	0	0	0	0	0	0	0	0	0	0	0
ENSMUSG00000068154	0	0	0	0	0	2	0	0	0	0	0	0	0	0	0	0	0	0	0	0	0	0	0	0	0	0	0	0
ENSMUSG00000068149	0	4	0	0	0	0	0	0	0	0	0	0	0	0	0	0	0	0	0	0	0	0	0	0	0	0	0	0
ENSMUSG00000068129	0	0	0	0	0	0	0	0	2	0	4	0	0	0	0	0	0	0	0	0	0	0	0	0	0	4	0	0
ENSMUSG00000068122	4	0	0	0	0	0	0	0	0	0	0	0	0	0	2	0	0	0	0	0	0	0	0	0	0	2	0	0
ENSMUSG00000068117	2	46	0	12	0	0	6	0	2	0	0	2	0	2	4	0	0	2	2	2	0	0	0	0	2	0	0	0
ENSMUSG00000068115	12	495	147	138	37	62	145	62	80	54	142	60	89	142	73	78	134	226	1448	70	217	209	459	442	252	262	552	340
ENSMUSG00000068114	131	342	180	135	86	94	254	146	170	81	234	178	119	104	35	48	87	149	103	127	56	70	32	20	50	44	42	16
ENSMUSG00000068105	0	0	0	0	2	0	0	0	2	28	64	88	36	0	0	6	10	0	0	0	4	0	0	0	2	0	0	0
ENSMUSG00000068101	56	54	279	202	44	106	36	8	60	10	28	46	36	109	4	153	181	82	54	103	39	629	36	79	872	193	62	36
ENSMUSG00000068099	0	0	0	0	4	0	0	0	0	0	6	2	0	0	0	0	0	0	0	0	0	0	0	0	0	0	0	0
ENSMUSG00000068082	0	0	0	0	0	0	0	2	0	0	0	0	0	0	0	0	0	0	0	4	0	0	0	2	4	0	2	4
ENSMUSG00000068079	0	27	154	81	0	0	0	0	0	0	0	0	0	0	0	0	2	0	0	0	0	0	0	0	0	0	0	0
ENSMUSG00000068068	0	0	0	0	0	0	0	0	0	0	0	0	0	0	0	0	0	0	0	0	0	0	0	0	0	0	0	0
ENSMUSG00000068040	1526	1382	1144	1251	1791	1558	1547	802	1950	609	4840	3554	2406	1626	764	703	991	3882	752	1567	1813	2614	1532	1772	2167	3456	2369	1374
ENSMUSG00000068039	2814	4802	3053	2925	3776	4109	3203	1883	5201	1828	4543	2474	2476	2674	1385	2533	3099	5850	3109	4615	2364	5213	5509	5326	7424	5880	4435	3723
ENSMUSG00000068037	0	0	0	0	0	0	0	0	0	0	0	0	0	0	0	0	0	0	0	0	0	0	0	0	0	0	0	0
ENSMUSG00000068036	610	2000	1054	1022	1304	1016	1119	376	455	357	2778	1878	1609	844	367	3204	1979	973	446	283	750	612	1033	748	313	146	364	419
ENSMUSG00000068015	155	197	56	78	307	228	137	54	96	102	340	215	204	60	46	322	301	173	167	101	32	249	224	203	130	126	140	195
ENSMUSG00000068011	0	0	2	0	0	0	0	0	0	0	0	0	0	0	0	0	0	0	0	0	4	20	0	0	22	68	22	28
ENSMUSG00000068009	0	0	0	0	0	0	0	2	0	0	0	0	0	0	0	0	0	0	0	0	0	2	0	0	2	0	2	2
ENSMUSG00000068008	0	0	0	2	6	0	6	4	0	0	0	0	0	0	0	0	0	0	0	0	0	0	0	0	0	0	0	0
ENSMUSG00000067998	0	0	0	0	0	0	0	0	0	2	0	0	0	0	0	0	0	6	0	0	0	0	0	0	0	0	0	0
ENSMUSG00000067995	271	238	164	194	401	564	123	62	322	142	351	274	168	116	50	269	358	420	383	352	341	185	194	170	240	116	186	124
ENSMUSG00000067973	0	0	0	0	0	0	0	0	0	0	0	0	0	0	0	0	0	0	0	0	0	0	0	0	0	0	0	0
ENSMUSG00000067971	0	0	0	0	0	0	0	0	0	0	2	0	0	0	0	0	0	0	0	0	0	0	0	0	0	0	0	0
ENSMUSG00000067882	0	4	0	0	0	0	0	0	0	0	0	0	0	0	0	0	0	10	2	0	0	0	2	4	2	0	2	0
ENSMUSG00000067879	0	0	2	0	0	0	0	0	2	0	0	0	0	18	6	0	0	0	0	6	7	0	9	6	4	0	8	0
ENSMUSG00000067878	108	0	32	33	98	70	135	44	127	164	702	382	406	281	189	318	597	236	144	54	88	99	22	12	198	132	10	156
ENSMUSG00000067873	132	962	322	298	515	624	592	339	436	1247	3015	1482	1851	756	381	645	772	1343	548	597	534	546	565	526	1037	811	577	725
ENSMUSG00000067872	0	4	2	9	2	8	0	2	4	0	4	2	2	2	0	2	0	4	0	0	0	2	1	0	0	2	0	0
ENSMUSG00000067860	18	0	0	5	22	88	2	0	0	20	979	476	224	299	105	0	0	6	2	16	0	56	16	4	37	62	24	60
ENSMUSG00000067851	450	860	523	744	457	420	560	158	246	212	522	253	346	343	160	640	605	1371	590	676	1088	1169	1220	921	1219	1703	1415	1112
ENSMUSG00000067847	606	541	533	610	436	1150	536	328	2452	739	2868	2278	937	744	237	547	959	2844	758	1390	600	851	1354	1778	1180	1398	1365	882
ENSMUSG00000067825	17	193	225	231	120	96	73	38	104	61	345	316	216	110	40	76	56	50	13	87	38	83	56	68	65	119	113	62
ENSMUSG00000067813	6	14	0	0	0	0	0	0	2	8	0	0	0	2	0	8	6	0	2	0	0	0	0	4	4	4	2	10
ENSMUSG00000067795	0	2	4	0	0	0	0	2	4	0	0	0	0	0	0	0	0	0	78	6	6	82	5	16	47	68	19	15
ENSMUSG00000067787	100	131	72	84	162	207	149	70	182	77	484	352	107	121	62	121	144	283	45	235	100	85	105	108	79	151	112	65
ENSMUSG00000067786	0	2	15	19	14	62	6	12	0	14	72	58	17	0	4	77	50	16	0	6	2	2	1	3	12	10	28	8
ENSMUSG00000067780	0	0	0	0	0	0	5	2	0	0	0	0	0	2	6	4	2	0	0	2	0	2	2	4	0	0	12	0
ENSMUSG00000067773	0	0	0	0	0	0	0	0	0	0	0	0	0	0	0	0	0	0	0	0	0	0	0	0	0	0	0	0
ENSMUSG00000067722	0	134	172	148	75	96	50	26	212	137	653	577	245	412	98	87	120	218	106	266	83	190	275	289	261	334	269	117
ENSMUSG00000067714	6	0	0	0	0	4	58	28	82	2	4	2	0	0	0	6	10	0	0	0	0	2	2	2	0	0	2	2
ENSMUSG00000067713	650	1319	728	822	339	490	564	266	966	302	1324	730	480	534	319	369	743	2531	759	915	382	850	1078	1023	1008	1044	1011	819
ENSMUSG00000067704	0	0	0	0	0	0	0	0	0	0	0	0	0	0	0	0	0	0	0	0	0	0	0	0	0	0	0	0
ENSMUSG00000067649	0	0	0	0	0	0	0	0	0	0	0	0	0	0	0	0	0	0	0	0	0	0	0	0	0	0	0	0
ENSMUSG00000067642	0	18	14	4	0	0	0	0	0	0	76	16	2	6	0	0	2	2	0	2	6	6	8	2	0	22	34	46
ENSMUSG00000067629	241	188	62	76	425	424	605	231	463	221	348	193	126	74	16	141	384	1027	778	757	702	685	445	594	602	1072	1007	617
ENSMUSG00000067616	0	0	0	0	0	2	2	0	0	0	10	6	12	8	2	0	0	0	0	0	0	0	0	0	0	4	0	0
ENSMUSG00000067610	0	0	0	0	0	0	0	0	0	0	0	0	0	0	0	0	0	0	0	0	0	0	0	0	0	0	0	0
ENSMUSG00000067608	317	595	1306	1207	605	997	362	180	715	328	892	396	394	985	134	759	1012	745	651	1409	498	1327	802	658	3550	1024	763	545
ENSMUSG00000067604	0	0	0	0	0	0	0	0	0	0	0	0	0	0	0	0	0	0	0	0	0	0	0	0	0	0	0	0
ENSMUSG00000067597	0	6	2	0	0	0	0	0	16	0	2	0	0	0	0	0	0	0	0	0	0	0	20	14	0	0	12	0
ENSMUSG00000067586	158	54	4	0	590	112	44	30	4	2	184	102	6	314	147	52	59	346	65	16	34	4	0	2	29	16	8	14
ENSMUSG00000067578	0	0	0	0	0	0	0	0	0	0	0	0	0	0	0	0	0	0	0	0	6	0	0	0	0	0	0	0
ENSMUSG00000067577	0	0	0	0	0	0	0	0	0	0	0	0	0	0	0	0	0	0	0	0	0	0	0	0	0	0	0	0
ENSMUSG00000067571	0	0	0	0	0	0	2	0	0	0	32	22	6	12	18	0	0	0	0	0	0	0	0	0	0	2	0	0
ENSMUSG00000067567	44	360	296	270	70	60	96	62	84	94	621	326	254	498	196	52	147	204	126	176	59	141	178	210	134	201	206	167
ENSMUSG00000067562	0	0	0	0	0	0	0	0	0	0	0	0	0	0	0	0	0	0	0	0	0	0	0	0	0	0	0	0
ENSMUSG00000067541	0	0	0	0	0	0	0	0	0	0	0	0	0	0	0	0	0	0	0	0	0	0	0	0	0	0	0	0
ENSMUSG00000067524	0	0	0	0	0	0	0	2	0	0	0	0	0	0	0	0	0	0	0	0	0	0	0	0	0	0	0	0
ENSMUSG00000067377	1425	256	289	306	282	600	748	383	214	384	1143	689	372	278	242	315	294	890	583	1325	296	319	392	367	641	865	461	327
ENSMUSG00000067370	70	105	306	170	42	176	1462	829	117	0	38	20	2	0	0	101	202	586	370	1286	245	179	222	311	316	376	358	211
ENSMUSG00000067369	0	65	48	40	0	0	0	0	0	0	140	90	82	74	34	80	106	220	14	14	46	76	78	78	61	130	100	62
ENSMUSG00000067367	303	352	529	437	337	396	175	97	368	201	1096	578	329	293	103	197	334	218	373	421	211	245	216	197	520	288	187	185
ENSMUSG00000067365	596	289	310	255	101	150	147	66	335	186	1067	634	364	191	45	122	239	644	290	310	235	312	297	270	415	297	331	284
ENSMUSG00000067341	0	0	0	0	0	0	196	26	0	2	8	6	6	0	2	64	139	995	0	83	0	0	0	0	0	0	0	0
ENSMUSG00000067336	141	1388	277	409	102	200	126	151	218	314	736	332	433	398	244	281	258	722	475	1794	444	545	249	112	142	285	467	162
ENSMUSG00000067288	5708	10902	7176	7687	4938	10676	4326	2813	12090	52	19416	13831	5535	3516	1136	2457	5751	21245	4534	11715	5685	11683	7681	12499	13242	25067	9300	7793
ENSMUSG00000067279	94	220	26	97	619	424	26	24	4	535	2245	1239	798	85	142	14	26	318	210	6	2	65	26	18	23	54	255	28
ENSMUSG00000067276	88	14	0	0	0	0	0	0	0	2	0	0	0	0	0	6	2	10	8	2	0	156	23	14	305	349	46	181
ENSMUSG00000067274	33528	36941	38884	41659	53117	69518	32360	20008	104310	31377	87055	57185	43912	47384	14902	31296	76695	174071	29619	53397	49057	69756	36721	44319	67077	114837	53277	44719
ENSMUSG00000067242	0	0	0	0	0	0	2	2	0	0	2	0	0	0	0	0	2	0	0	0	0	0	0	0	0	0	2	0
ENSMUSG00000067220	0	0	0	0	6	2	818	198	0	0	0	0	0	0	0	0	0	0	0	0	0	0	0	0	2	0	0	0
ENSMUSG00000067219	0	2	0	2	23	34	157	30	12	0	0	0	0	0	0	66	56	46	0	2	2	38	4	6	18	216	2	12
ENSMUSG00000067215	12	8	4	2	2	0	2	0	0	0	6	6	10	6	0	0	0	0	2	0	0	4	10	6	6	0	0	4
ENSMUSG00000067206	0	4	0	0	0	0	2	0	4	6	8	8	4	2	6	0	6	0	2	0	0	10	10	16	18	4	2	4
ENSMUSG00000067201	1589	402	162	178	1206	967	12534	4932	285	76	6610	5167	2969	959	631	0	0	0	103	4	182	1077	808	1069	1195	576	1199	1850
ENSMUSG00000067186	0	0	0	0	0	0	48	8	32	0	0	0	0	0	0	0	0	0	0	0	0	0	0	0	0	0	0	0
ENSMUSG00000067158	0	0	0	0	0	0	2	0	0	0	8	4	32	4	8	902	1005	12	56	18	0	4	0	0	2	0	0	0
ENSMUSG00000067150	1455	753	683	617	2230	2006	2433	1166	3490	643	1480	882	924	826	431	1146	1381	1895	702	1271	1189	1639	979	927	1353	1551	1613	988
ENSMUSG00000067149	0	36	30	43	0	2	10	6	2	10	46	28	15	14	8	28	42	190	6	4	2	16	6	10	12	4	4	26
ENSMUSG00000067148	316	239	317	140	357	430	343	158	545	216	426	244	150	170	76	166	367	1384	320	593	293	498	650	682	585	580	543	420
ENSMUSG00000067144	0	0	0	0	0	0	0	0	10	0	0	0	2	0	0	0	1	0	0	0	0	0	0	0	2	2	0	0
ENSMUSG00000067081	0	0	0	0	0	0	0	2	0	0	0	0	0	0	0	0	0	0	0	0	2	0	0	0	0	0	0	2
ENSMUSG00000067071	342	286	547	559	56	72	92	58	204	229	878	843	406	223	44	33	62	435	371	167	285	324	285	391	222	511	309	206
ENSMUSG00000067049	0	12	0	0	0	4	0	0	6	0	0	0	0	0	0	0	0	2	0	0	0	0	0	0	0	0	0	0
ENSMUSG00000067038	26020	26188	31825	26240	16257	24428	10141	5084	32828	24961	40144	24415	16865	17191	5814	8845	20400	61381	15986	35684	14894	22691	14829	15945	28881	35354	17895	18004
ENSMUSG00000067006	0	0	0	0	12	4	2	0	0	4	0	0	0	0	0	0	0	0	0	4	0	23	24	18	78	0	152	2
ENSMUSG00000067001	110	0	0	0	0	0	0	2	0	8	100	40	18	12	14	7558	2810	10	0	30	0	2	4	0	4	0	2	2
ENSMUSG00000066979	698	2368	3444	3259	505	515	557	266	893	389	1940	1019	621	873	241	466	738	1690	607	949	916	1415	1690	1784	1829	1850	1757	950
ENSMUSG00000066975	0	0	2	0	0	0	0	0	2	0	0	0	2	2	0	0	0	0	0	0	0	0	0	0	0	0	2	0
ENSMUSG00000066964	0	0	0	0	0	0	0	0	0	0	0	0	0	0	0	0	0	0	0	0	0	0	0	0	0	0	0	0
ENSMUSG00000066944	0	0	0	0	0	0	0	0	0	0	2	0	2	0	0	0	0	0	2	0	0	0	0	0	0	0	0	0
ENSMUSG00000066936	0	0	0	0	0	0	0	0	0	0	0	0	0	0	0	0	0	0	0	0	0	0	0	0	0	0	0	0
ENSMUSG00000066900	310	197	117	127	112	74	60	12	158	128	1267	794	503	511	134	146	192	1836	611	669	749	1100	884	1181	864	1115	995	681
ENSMUSG00000066894	78	908	257	353	87	113	80	20	54	14	210	126	74	67	2	28	12	288	189	50	108	326	239	282	207	244	406	210
ENSMUSG00000066892	283	38	44	66	349	643	126	96	490	118	782	616	447	598	190	112	243	471	194	324	214	231	276	441	342	472	276	196
ENSMUSG00000066878	420	551	2767	2723	1863	2030	569	367	1720	516	1461	725	933	2656	578	1864	2070	1690	1015	1879	717	3744	761	872	4456	1064	622	827
ENSMUSG00000066877	426	343	696	685	300	314	364	188	322	693	2763	1742	542	913	211	237	327	416	240	214	132	274	440	380	363	319	511	297
ENSMUSG00000066842	1873	191	213	52	759	310	681	513	26	180	438	202	230	272	86	312	276	932	1200	54	91	92	128	86	36	22	18	546
ENSMUSG00000066839	283	860	848	632	897	1544	888	534	2764	622	1779	1458	1099	1086	279	376	763	2029	626	1150	1173	857	1349	1593	850	1305	1600	711
ENSMUSG00000066800	0	119	230	563	18	8	227	73	52	8	568	322	236	84	53	28	24	250	24	48	56	70	125	64	68	44	70	88
ENSMUSG00000066798	4	114	39	64	72	42	40	0	24	14	130	62	57	30	28	68	78	86	80	46	124	174	143	130	118	192	277	137
ENSMUSG00000066797	0	0	0	0	0	0	0	0	0	0	16	10	4	0	0	0	0	0	0	0	0	0	0	0	0	46	0	4
ENSMUSG00000066756	0	0	0	0	0	0	0	0	0	0	0	0	0	0	0	0	0	0	0	0	0	0	0	0	0	0	0	0
ENSMUSG00000066755	0	0	0	0	0	0	70	98	178	202	4	4	22	0	0	15	48	0	6	10	2	0	0	0	0	0	0	0
ENSMUSG00000066735	84	167	56	49	46	26	52	12	101	79	190	120	93	59	26	48	54	234	50	120	116	144	64	82	124	168	86	79
ENSMUSG00000066724	1862	4650	4889	4847	1009	1745	1965	1032	5822	1794	9981	7227	3391	2963	883	1079	2153	7415	1654	3886	3090	4591	3889	4719	5293	8069	4434	3805
ENSMUSG00000066721	0	30	19	26	22	18	28	22	420	18	539	489	131	58	36	16	64	98	8	100	412	802	234	506	343	438	168	291
ENSMUSG00000066705	4	857	507	855	728	1867	368	127	1120	239	1009	1075	197	410	64	372	555	18	245	4	113	402	88	80	215	343	142	325
ENSMUSG00000066687	1984	2	2	0	0	0	56	20	0	0	0	2	0	0	0	215	202	2	6	0	12	90	58	48	48	4	290	54
ENSMUSG00000066677	0	0	0	0	0	0	0	0	0	84	694	568	315	58	24	24	140	113	58	132	2	0	0	0	2	2	0	0
ENSMUSG00000066671	0	0	0	0	0	0	0	0	0	0	0	0	0	0	0	0	0	0	0	0	0	0	0	0	0	0	0	0
ENSMUSG00000066652	0	0	4	10	2	0	0	0	0	2	33	24	4	8	0	4	0	2	0	0	2	112	2	0	47	18	2	4
ENSMUSG00000066647	0	14	10	14	2	4	8	8	2	2	26	12	6	6	4	6	2	20	6	0	2	4	2	2	16	4	5	6
ENSMUSG00000066643	127	386	217	394	335	377	332	151	304	46	246	137	107	132	64	222	330	852	203	642	517	355	467	476	369	450	321	471
ENSMUSG00000066640	457	274	390	323	696	414	362	170	600	150	863	913	754	497	161	212	235	406	118	273	284	551	330	377	277	433	527	237
ENSMUSG00000066637	46	52	33	34	18	42	78	22	68	42	40	22	14	14	6	16	22	328	33	58	40	65	26	18	134	48	30	45
ENSMUSG00000066632	3633	8207	4780	7657	11715	16417	7641	5260	10164	4182	31554	15132	8083	5276	4949	4173	9073	11789	3983	7275	11033	17692	4065	4055	17455	16133	12348	7477
ENSMUSG00000066621	452	543	122	286	622	753	426	250	556	603	4072	3724	1830	665	244	335	619	1684	395	408	477	406	662	782	287	683	1009	383
ENSMUSG00000066607	0	154	161	225	78	108	4	4	101	24	450	327	267	494	93	11	16	308	228	93	343	265	161	230	301	145	103	269
ENSMUSG00000066595	12	34	30	35	72	46	42	10	84	10	20	6	4	8	4	64	54	192	44	14	47	26	21	18	18	32	50	20
ENSMUSG00000066571	407	1177	191	378	457	326	1312	403	1176	221	1452	771	779	806	422	931	637	844	371	2013	792	837	970	699	566	1037	1125	671
ENSMUSG00000066568	1292	926	515	567	1107	871	999	377	1152	506	1606	714	706	683	270	780	1028	1892	675	1356	895	766	955	958	956	954	1051	717
ENSMUSG00000066551	3715	2054	5968	4859	2875	4624	2013	1015	2720	1538	4709	2811	1418	3881	875	3142	5366	6524	3709	4045	3385	4681	4668	4171	7579	4244	4587	3091
ENSMUSG00000066500	0	0	0	0	2	0	4	2	0	0	2	2	0	0	0	0	2	0	0	0	0	0	0	2	0	0	0	0
ENSMUSG00000066456	67	55	471	309	254	631	234	273	546	52	1366	910	881	994	576	70	120	109	76	298	234	189	321	344	305	302	232	250
ENSMUSG00000066441	209	579	567	450	257	210	154	70	332	222	677	333	256	273	110	139	153	402	232	213	229	390	152	162	298	254	164	194
ENSMUSG00000066440	368	1475	408	654	1230	756	554	190	446	296	714	482	459	430	244	615	626	958	383	489	558	828	977	1011	528	750	1197	448
ENSMUSG00000066438	2	8	4	8	0	6	18	5	0	4	88	64	34	99	58	4	12	2	10	2	0	0	0	0	0	0	0	0
ENSMUSG00000066415	295	150	119	188	281	185	88	49	156	56	195	71	60	60	21	124	156	292	179	129	124	221	206	202	248	224	283	163
ENSMUSG00000066406	1196	3292	927	1461	2036	1502	1312	261	635	511	1616	842	968	863	414	2063	1418	808	402	680	1435	1028	894	482	313	666	1072	530
ENSMUSG00000066392	0	0	0	0	0	0	64	4	30	14	0	0	4	0	10	0	0	8	0	0	225	0	0	0	0	0	0	0
ENSMUSG00000066383	2	2	2	0	0	0	0	0	0	0	14	8	0	6	4	0	0	0	8	0	2	0	0	0	2	0	0	0
ENSMUSG00000066382	0	4	0	0	0	0	0	0	0	0	0	0	0	0	0	0	0	0	0	0	0	0	0	0	0	0	0	0
ENSMUSG00000066368	0	0	12	34	0	0	0	0	0	4	0	0	0	2	0	4	2	0	0	2	0	0	0	2	0	0	0	0
ENSMUSG00000066359	0	0	0	0	0	0	0	0	0	0	0	0	0	0	0	0	0	0	0	0	0	0	0	0	0	0	0	0
ENSMUSG00000066357	1910	2112	4779	4368	661	931	822	451	2358	947	5385	3983	2692	2268	1204	3078	3596	5271	7710	1644	1821	4894	4670	6354	2909	4744	6276	3651
ENSMUSG00000066324	155	256	167	224	426	426	427	314	1482	161	500	257	358	232	131	345	521	1264	902	1506	412	575	394	296	505	702	556	489
ENSMUSG00000066319	0	0	0	0	0	0	0	0	0	46	0	0	0	0	0	0	0	0	0	0	0	0	0	0	0	0	0	0
ENSMUSG00000066306	8891	6956	6595	7409	9293	9028	10136	4068	11514	1600	13812	10081	4092	5070	1510	5605	9511	9525	3605	4997	2995	6531	8806	8996	6010	7718	11011	5358
ENSMUSG00000066279	0	0	0	0	0	0	0	0	0	2	0	2	0	0	0	4	8	0	2	0	0	0	0	0	0	0	0	2
ENSMUSG00000066278	433	268	805	863	295	443	209	102	492	160	720	604	396	515	145	384	468	275	374	828	566	438	535	903	549	719	590	339
ENSMUSG00000066269	0	0	0	0	0	0	0	0	0	0	0	0	0	0	0	0	0	0	0	0	0	0	0	0	0	0	0	0
ENSMUSG00000066268	0	0	0	0	0	0	0	0	0	0	0	0	0	0	0	0	0	0	0	0	0	0	0	0	0	0	0	0
ENSMUSG00000066263	0	0	0	0	0	0	0	2	0	0	0	0	0	0	0	0	0	0	0	0	0	0	0	0	0	0	0	0
ENSMUSG00000066262	0	0	0	0	0	0	0	0	0	0	0	0	0	0	0	0	0	0	0	0	0	0	0	0	0	0	0	0
ENSMUSG00000066235	279	485	695	750	122	200	397	223	1111	169	452	348	193	360	106	70	166	755	424	252	253	597	820	1304	505	1111	1126	620
ENSMUSG00000066233	69	267	24	52	40	83	172	99	181	89	1030	700	304	437	107	54	134	376	144	50	47	127	109	114	122	419	162	166
ENSMUSG00000066232	1653	2810	2391	2625	1603	1096	882	459	1052	993	2371	1218	1262	1702	762	3940	2482	2282	764	1493	1204	1869	1237	1039	1725	1726	1256	869
ENSMUSG00000066224	0	0	2	4	6	0	10	8	2	0	4	4	6	0	0	0	0	4	0	0	0	0	0	0	0	22	0	12
ENSMUSG00000066197	0	0	0	0	0	0	0	0	0	0	0	0	0	0	0	0	0	0	0	0	0	0	0	0	0	0	0	0
ENSMUSG00000066196	16	16	22	6	0	0	8	8	12	12	20	4	6	4	2	14	42	2	0	2	10	10	8	7	18	6	26	2
ENSMUSG00000066191	111	315	282	227	84	84	223	104	234	138	779	561	153	188	46	142	206	173	190	62	123	299	183	301	194	210	365	204
ENSMUSG00000066189	0	0	0	0	0	0	0	0	0	0	0	0	0	0	0	0	0	0	0	0	0	0	0	0	0	0	0	0
ENSMUSG00000066178	23	32	118	40	2	4	0	0	2	0	10	4	14	6	0	4	6	8	14	9	14	16	20	18	5	12	29	16
ENSMUSG00000066152	54	52	48	60	122	142	98	68	58	31	636	443	229	60	18	22	36	76	282	75	74	101	45	44	60	58	50	52
ENSMUSG00000066151	1522	1690	583	697	1233	1240	1360	549	930	463	1780	1050	940	832	470	728	863	2429	1159	1325	1155	1734	1585	1512	1465	1994	2237	1949
ENSMUSG00000066150	121	211	106	87	44	23	91	35	141	24	138	98	98	42	22	64	63	324	80	115	119	148	110	108	104	209	124	78
ENSMUSG00000066149	26	230	144	98	48	102	44	28	98	68	320	246	53	99	30	71	119	442	193	139	135	108	122	111	179	266	171	131
ENSMUSG00000066148	96	289	249	261	288	240	126	98	324	54	310	196	183	186	80	278	295	491	227	284	97	269	273	284	355	242	374	159
ENSMUSG00000066141	0	0	0	0	0	0	0	0	0	0	0	0	0	0	0	0	0	0	0	0	0	0	0	0	0	0	0	0
ENSMUSG00000066129	0	0	0	4	0	0	4	10	0	0	0	0	2	0	4	2	0	0	4	0	0	0	0	0	0	0	0	0
ENSMUSG00000066113	1037	4294	2938	4924	508	236	1188	586	180	561	9060	7373	2981	968	131	26	52	5153	30	141	82	185	10	6	579	1509	36	508
ENSMUSG00000066090	0	0	0	0	0	0	0	0	0	0	0	0	0	0	0	0	0	0	0	0	0	0	0	0	2	0	0	0
ENSMUSG00000066058	0	0	2	2	0	0	0	0	0	0	14	14	5	0	0	2	6	12	18	0	0	2	4	2	4	25	12	0
ENSMUSG00000066043	412	500	417	396	320	224	396	152	160	72	492	242	292	403	184	640	605	256	217	259	340	523	419	408	336	418	475	239
ENSMUSG00000066042	128	110	81	106	76	100	309	140	72	50	98	72	32	50	29	54	100	120	97	81	59	70	104	84	143	88	112	68
ENSMUSG00000066037	967	1805	1410	1596	1292	1422	908	380	1184	541	2033	832	756	873	329	1199	1507	1125	681	1050	959	1296	1737	1637	1664	1745	1875	1213
ENSMUSG00000066036	6027	9712	3590	5242	7956	6650	4861	1753	4423	2728	15653	10708	7520	4246	2438	3629	3524	10262	5044	7191	4697	7373	6020	5216	4537	6741	7220	4294
ENSMUSG00000066026	2199	1559	524	198	244	998	1072	699	1443	38	774	546	333	637	177	24	32	350	1182	961	110	2089	2229	2910	1434	6502	2442	3242
ENSMUSG00000065990	382	925	1602	1162	531	833	474	277	2046	1726	4717	3776	1988	1486	329	429	980	2592	1102	1383	1443	2259	1729	1807	2343	2884	1836	2070
ENSMUSG00000065987	0	0	0	0	0	0	0	0	0	0	0	0	0	0	0	0	0	0	0	0	0	0	0	0	0	0	0	0
ENSMUSG00000065979	216	192	414	347	89	98	62	34	69	37	429	300	198	598	161	166	265	563	278	108	78	98	181	123	60	106	208	43
ENSMUSG00000065954	2002	517	75	176	2972	2478	513	144	366	237	1484	674	587	875	312	574	248	447	245	261	811	1101	753	592	372	748	1295	319
ENSMUSG00000065947	0	0	0	0	3513	8544	0	0	4	0	0	6	0	0	0	0	0	0	0	0	28	0	0	0	0	0	0	0
ENSMUSG00000064330	0	0	0	0	0	0	0	0	0	0	0	0	0	0	0	0	0	0	2	0	0	0	2	0	0	0	0	0
ENSMUSG00000064325	0	27	455	633	70	654	128	170	0	2	3972	2486	4967	1241	481	1063	1569	0	4	0	0	0	0	0	2	4	0	0
ENSMUSG00000064317	507	568	771	665	388	807	182	149	831	228	867	667	200	384	75	211	364	738	418	560	383	552	945	1368	751	1036	751	547
ENSMUSG00000064310	0	0	0	0	0	0	0	0	0	12	0	0	0	0	0	0	0	0	0	2	0	0	0	0	0	0	0	0
ENSMUSG00000064308	1189	13972	6725	11591	916	3327	4931	1553	1524	1057	8344	5777	1323	215	149	864	1187	5777	2711	7859	5746	1138	460	606	1548	18	898	2008
ENSMUSG00000064307	110	53	96	92	65	82	40	20	22	10	82	62	19	32	2	11	52	112	16	16	78	111	66	72	75	128	52	51
ENSMUSG00000064302	458	1242	805	1045	965	486	673	152	234	281	678	394	307	1256	1092	730	456	876	598	946	803	1123	1053	953	554	1440	1440	541
ENSMUSG00000064299	0	0	0	0	0	0	0	0	0	0	0	0	0	0	0	0	0	8	0	0	0	0	0	0	0	0	0	0
ENSMUSG00000064294	0	0	0	2	0	0	0	0	0	0	0	0	0	0	0	0	0	0	1053	634	105	256	340	279	128	172	657	766
ENSMUSG00000064293	30	4	0	6	0	0	2	0	60	0	2	0	0	0	0	0	0	30	4	52	12	0	0	2	22	0	34	0
ENSMUSG00000064289	202	287	124	140	248	272	242	136	148	130	358	262	143	330	100	143	247	660	164	284	633	773	664	587	857	794	474	1381
ENSMUSG00000064284	168	30	150	236	105	189	198	114	308	183	212	208	70	65	10	24	68	58	20	112	18	38	63	89	14	79	58	34
ENSMUSG00000064280	0	8	22	30	0	0	32	10	4	0	2	2	0	4	2	4	4	34	0	0	2	2	24	16	2	0	6	0
ENSMUSG00000064272	8	12	55	20	16	26	0	2	96	6	4	4	0	12	8	6	4	4	8	0	0	4	4	8	2	8	2	6
ENSMUSG00000064267	1027	47	12	10	74	41	49	14	158	14	6	2	2	0	0	29	56	130	471	78	16	50	175	232	41	68	301	34
ENSMUSG00000064264	92	382	613	506	451	815	367	260	939	198	814	698	276	534	152	145	382	546	152	256	255	142	358	520	205	437	355	149
ENSMUSG00000064262	0	4	0	2	0	0	0	0	0	0	0	0	0	0	0	2	0	0	10	0	2	10	0	0	6	8	0	4
ENSMUSG00000064254	354	338	175	279	784	924	749	665	3736	313	1506	1228	516	337	116	342	670	2120	1544	760	1132	814	746	1152	549	1103	837	596
ENSMUSG00000064247	2	88	27	42	61	123	129	62	126	2	922	816	416	8	2	0	0	4	0	0	0	0	0	0	0	0	0	0
ENSMUSG00000064246	238	1362	1258	94	44	16	0	0	8	2	4	8	0	2	10	0	0	0	20	32	3306	12	0	0	23	1347	12	635
ENSMUSG00000064225	8	18	16	18	0	0	0	0	0	0	0	0	0	0	0	0	0	0	0	0	0	0	0	0	0	0	0	2
ENSMUSG00000064215	88	90	0	2	63	138	3318	934	2	32	1153	743	265	365	119	51	154	695	128	70	153	283	162	256	11	66	30	75
ENSMUSG00000064210	716	1790	690	1207	3431	1804	366	110	1163	218	1282	682	846	845	369	1222	661	3019	670	719	661	1130	1122	803	677	650	1345	598
ENSMUSG00000064202	8	6	0	0	111	176	2	0	0	6	20	10	10	2	0	54	80	26	4	0	8	10	16	17	30	102	32	24
ENSMUSG00000064201	2	0	2	4	0	0	55	22	6	0	290	232	85	204	32	36	135	8	0	0	61	0	0	0	4	0	0	0
ENSMUSG00000064181	30	64	126	70	64	104	8	18	36	56	334	154	183	97	104	180	234	194	272	244	140	172	368	435	193	403	449	172
ENSMUSG00000064179	2	181	29	6	1195	1364	166	118	578	2	3130	2213	300	555	69	0	0	10	0	37	19	0	0	0	172	4	0	0
ENSMUSG00000064177	0	5	0	0	0	0	0	0	0	0	0	0	0	0	0	0	0	0	0	0	4	0	0	0	0	0	0	0
ENSMUSG00000064165	0	2	0	0	0	0	4	0	0	0	97	80	22	2	2	0	4	0	0	0	0	0	0	2	0	0	0	0
ENSMUSG00000064158	0	4	8	4	6	10	4	0	4	0	308	174	40	4	3	0	0	0	96	10	2	4	0	2	18	3	0	0
ENSMUSG00000064156	0	0	0	0	0	0	0	0	0	0	0	0	0	0	0	0	0	0	0	0	0	0	0	0	0	0	0	0
ENSMUSG00000064147	0	0	0	2	6	16	0	0	0	2	2	6	2	0	0	10	5	0	82	0	0	0	0	2	0	2	4	0
ENSMUSG00000064145	878	1646	1103	1086	504	630	367	202	794	380	912	476	481	435	175	568	743	1002	484	625	912	1038	1163	1147	1135	1373	1261	935
ENSMUSG00000064140	80	165	452	764	118	82	1999	429	182	216	126	104	107	449	176	146	195	0	0	0	0	0	0	0	0	0	2	2
ENSMUSG00000064138	323	421	195	322	237	158	116	48	118	41	214	82	94	70	38	87	88	615	238	230	260	950	510	570	884	881	732	664
ENSMUSG00000064129	0	0	0	0	0	0	0	0	0	0	0	0	0	0	0	0	0	0	0	0	0	0	0	0	0	0	0	0
ENSMUSG00000064128	46	50	126	148	164	214	157	52	72	63	112	64	40	102	13	28	74	140	146	46	46	107	74	73	213	78	86	76
ENSMUSG00000064127	624	817	466	716	630	658	542	151	472	245	1057	606	457	422	250	323	322	292	266	785	739	1166	1020	830	1092	1801	1173	822
ENSMUSG00000064125	0	62	328	427	10	20	8	2	72	18	42	34	4	18	4	4	0	76	37	12	2	2	10	26	6	24	6	16
ENSMUSG00000064121	0	0	0	0	0	0	0	0	0	0	0	0	0	0	0	0	0	0	0	0	0	0	0	0	0	0	0	0
ENSMUSG00000064120	478	667	198	340	953	1169	255	80	565	105	721	498	284	501	170	132	150	1765	343	166	565	832	655	817	646	772	1121	779
ENSMUSG00000064115	0	0	0	0	4	4	2	0	0	0	0	0	0	0	4	0	8	0	135	0	0	0	0	0	0	0	0	0
ENSMUSG00000064109	0	6	0	0	0	0	0	0	0	0	10	8	3	53	18	0	0	0	0	0	0	0	0	4	4	2	0	0
ENSMUSG00000064105	412	273	902	2663	1931	2418	6701	3168	2253	210	760	500	554	380	317	851	575	896	208	106	449	217	138	225	234	304	370	186
ENSMUSG00000064090	76	323	329	381	241	346	433	190	204	159	446	203	202	287	78	136	164	190	288	234	194	476	587	537	752	650	528	256
ENSMUSG00000064080	4900	26438	8090	11307	473	844	2373	1679	3437	5461	2730	2341	917	9509	1725	10599	21332	48070	2689	89415	30370	154	42	64	2928	341	159	2254
ENSMUSG00000064068	581	1289	1641	1336	569	808	862	457	1825	341	1857	1299	891	596	178	722	1143	1284	514	1412	982	2104	1862	2797	2356	2741	2348	1438
ENSMUSG00000064065	0	10	4	4	12	20	8	0	0	2	4	2	0	0	4	2	0	14	8	0	0	30	0	2	0	4	0	10
ENSMUSG00000064063	1056	1303	1931	2125	1208	2683	953	503	3841	773	5857	4458	1802	1390	480	617	1171	4250	1356	2374	1309	2123	1328	1556	2880	3117	1227	1082
ENSMUSG00000064061	112	307	174	185	271	286	520	183	270	120	748	390	386	282	110	101	190	263	163	66	82	124	50	40	113	180	128	112
ENSMUSG00000064057	0	0	0	0	0	0	0	0	0	0	0	0	0	0	0	0	0	0	0	0	0	0	0	0	0	0	0	0
ENSMUSG00000064052	0	0	0	0	0	0	0	0	0	0	0	0	0	0	0	0	0	0	0	0	0	0	0	0	0	0	0	0
ENSMUSG00000064039	0	0	0	0	0	0	0	0	0	0	0	0	0	0	0	0	0	0	0	0	0	0	0	0	0	0	0	0
ENSMUSG00000064037	515	335	217	206	193	276	449	188	558	60	631	344	291	214	114	378	394	776	316	177	286	599	697	669	608	742	648	414
ENSMUSG00000064036	0	0	0	0	14	6	0	0	4	10	4	4	4	0	0	0	0	0	2	0	0	6	0	0	2	10	0	0
ENSMUSG00000064030	466	230	244	254	49	87	157	108	224	173	570	486	360	295	113	94	244	647	309	276	228	481	344	506	438	573	376	282
ENSMUSG00000064023	2	0	0	0	8	6	38	6	0	2	6	8	4	0	0	0	0	0	0	0	0	0	0	0	0	0	0	0
ENSMUSG00000064016	0	0	0	0	0	0	0	0	0	0	0	0	0	0	0	0	0	24	2	0	0	0	0	0	0	0	0	0
ENSMUSG00000064010	0	0	0	0	0	0	0	0	0	0	0	0	0	0	0	0	0	0	0	0	0	0	0	0	0	0	0	0
ENSMUSG00000063972	34	22	6	4	10	4	20	2	16	14	26	6	12	18	6	24	24	32	10	24	18	12	24	6	4	30	46	6
ENSMUSG00000063971	0	0	44	160	0	0	16	8	0	2	20	6	3	4	0	0	0	0	0	0	8	0	0	0	2	0	0	0
ENSMUSG00000063952	201	525	207	292	778	778	416	135	216	272	483	370	258	386	150	183	220	819	382	426	381	489	378	398	555	593	710	325
ENSMUSG00000063935	0	0	0	0	0	0	0	0	0	0	0	0	0	0	2	0	0	0	0	0	10	0	0	0	0	0	0	0
ENSMUSG00000063932	0	0	0	0	0	0	0	0	0	0	0	0	0	0	0	0	0	0	0	0	1859	408	0	0	228	0	0	246
ENSMUSG00000063931	1209	1474	879	1093	662	802	852	510	952	1229	2442	1609	918	1649	578	621	970	976	712	935	596	970	1139	1274	909	1050	1256	835
ENSMUSG00000063919	0	2	2	0	0	0	0	0	0	0	0	0	0	0	0	0	0	58	72	6	0	8	8	18	24	0	12	4
ENSMUSG00000063904	2238	3604	4089	3917	2450	2358	1065	857	1724	1392	2347	1989	2187	2640	624	1119	1415	4691	1302	2913	1838	3318	2166	2854	2582	4477	2544	1705
ENSMUSG00000063897	278	1185	912	821	1835	3684	313	118	80	285	1044	952	592	481	117	335	639	2229	147	465	365	1062	1164	2415	2325	2375	1450	1116
ENSMUSG00000063895	132	536	297	309	202	99	110	54	176	112	532	214	295	225	80	268	250	306	136	366	231	520	339	229	670	408	328	255
ENSMUSG00000063889	56	12	12	22	59	38	87	22	14	11	149	77	49	28	26	11	30	158	18	39	38	62	100	97	73	144	98	94
ENSMUSG00000063888	1013	1070	1005	927	883	1149	802	477	721	342	1757	995	877	673	318	772	1321	1906	793	791	540	916	849	780	916	1836	1069	586
ENSMUSG00000063887	0	6	0	0	20	6	4	2	2	0	56	22	58	4	4	0	0	0	0	6	0	0	0	0	0	2	0	2
ENSMUSG00000063884	472	978	936	820	306	272	460	133	416	791	3886	2472	1666	876	283	367	552	868	830	860	499	614	769	644	908	740	814	541
ENSMUSG00000063882	880	1013	1475	1355	663	1779	601	412	1784	1373	4242	2764	915	919	388	903	2391	3395	912	1593	829	1405	1900	2103	2408	2888	1957	2363
ENSMUSG00000063873	168	8	2	12	328	320	90	205	140	2	716	442	1568	547	409	42	12	300	404	1121	1127	529	704	746	433	153	560	621
ENSMUSG00000063851	0	2	0	0	0	2	4	0	0	0	0	0	0	0	0	119	44	2	0	0	0	0	2	2	0	0	0	2
ENSMUSG00000063849	151	127	128	98	54	114	50	28	158	36	320	198	156	82	34	32	36	94	112	103	66	194	106	131	114	152	146	120
ENSMUSG00000063838	0	350	153	104	12	12	177	81	14	435	4379	3454	1150	875	202	58	384	2258	232	233	599	216	305	565	386	621	312	347
ENSMUSG00000063821	0	0	0	0	0	0	0	0	20	0	0	0	0	0	0	0	0	0	0	0	0	0	0	0	0	0	0	0
ENSMUSG00000063820	0	2	4	0	6	22	107	55	220	0	6	4	0	0	0	0	0	0	0	0	2	3	0	2	0	8	0	24
ENSMUSG00000063810	64	343	234	330	200	202	365	183	242	112	316	152	110	121	61	135	247	184	76	134	70	222	190	122	283	266	152	155
ENSMUSG00000063808	175	352	186	169	182	282	132	76	236	94	336	184	139	112	57	236	405	1124	146	154	206	345	440	390	338	386	534	342
ENSMUSG00000063804	0	0	0	0	0	0	0	0	0	0	0	0	0	0	0	0	0	0	0	0	0	2	0	0	0	0	0	0
ENSMUSG00000063802	503	620	862	836	614	1165	272	262	1657	305	1492	1331	502	843	203	505	972	1805	547	688	782	1709	1721	3019	1867	2344	1888	992
ENSMUSG00000063801	430	554	542	823	74	131	309	143	1147	183	510	339	220	237	61	209	259	612	118	342	156	149	208	217	211	292	193	186
ENSMUSG00000063800	377	398	296	278	315	424	311	156	292	74	248	106	116	88	40	337	451	768	194	423	278	362	501	494	499	524	454	312
ENSMUSG00000063796	0	0	0	0	0	0	0	0	0	0	0	2	0	0	0	0	0	0	0	0	0	0	0	0	0	0	0	0
ENSMUSG00000063787	298	473	457	394	289	612	282	178	548	76	750	504	381	298	80	401	667	780	230	201	289	480	375	478	721	606	389	277
ENSMUSG00000063767	0	0	0	0	0	0	0	0	0	0	0	0	0	0	0	2	0	12	0	2	0	0	0	2	0	0	0	0
ENSMUSG00000063765	0	4	22	38	2	0	32	4	22	54	72	48	12	230	71	2	6	0	5	2	4	19	30	50	38	98	106	2
ENSMUSG00000063760	128	395	135	146	108	89	405	192	192	42	124	66	79	96	41	108	94	266	259	184	285	402	523	530	427	488	659	248
ENSMUSG00000063757	0	0	0	0	0	0	0	0	0	0	0	0	0	2	0	0	0	0	0	0	10	8	0	0	2	2	8	0
ENSMUSG00000063727	53	0	265	73	1284	6361	3908	2515	2	6	424	204	52	62	40	132	112	1808	116	2944	0	332	8	4	180	184	0	64
ENSMUSG00000063704	0	8	0	2	0	2	120	63	22	6	0	0	0	0	0	2	12	37	0	0	10	0	0	0	0	4	2	0
ENSMUSG00000063698	406	351	513	458	0	0	0	0	0	74	338	244	192	120	47	182	272	340	0	0	0	0	0	0	0	0	0	0
ENSMUSG00000063683	0	0	0	0	0	0	0	0	0	0	0	0	0	0	0	0	0	0	0	0	0	0	0	0	0	0	0	0
ENSMUSG00000063681	2	0	0	0	0	0	2	0	0	0	0	0	0	0	0	2	2	0	0	0	0	0	0	2	0	0	0	0
ENSMUSG00000063672	0	0	0	0	0	0	0	0	0	0	0	0	0	0	0	0	0	0	8	0	0	0	0	0	0	0	0	0
ENSMUSG00000063663	188	221	116	202	255	344	106	36	102	60	220	124	114	110	56	211	230	150	60	124	132	246	170	86	236	254	260	116
ENSMUSG00000063659	103	380	223	287	387	326	132	77	132	112	356	135	169	244	71	40	58	288	166	208	98	125	122	82	154	80	110	86
ENSMUSG00000063651	0	0	0	0	0	6	2	0	6	0	4	4	0	6	2	0	0	0	0	0	0	0	0	0	2	0	0	0
ENSMUSG00000063646	13	0	2	0	0	6	0	0	0	2	0	4	0	0	0	0	0	0	2	0	0	2	0	2	2	0	0	0
ENSMUSG00000063626	0	0	0	0	4	2	0	0	4	0	0	0	0	2	0	4	0	0	8	0	0	0	0	0	0	0	0	0
ENSMUSG00000063615	0	0	0	0	0	0	0	0	0	0	0	0	0	0	0	0	0	0	0	0	0	0	0	0	0	0	0	0
ENSMUSG00000063605	468	592	428	477	975	914	730	426	962	877	4588	3341	1188	853	195	308	878	4128	884	1299	2467	1223	977	1197	1396	2338	1293	963
ENSMUSG00000063600	0	0	0	0	0	0	0	0	0	0	0	0	0	0	0	0	0	0	0	0	0	0	0	0	0	0	0	0
ENSMUSG00000063594	2	0	0	0	18	28	36	185	929	0	0	0	0	0	0	0	0	78	0	0	0	0	2	0	0	0	0	0
ENSMUSG00000063576	1200	1905	1471	2054	526	826	1231	627	1115	539	1858	1415	738	926	376	765	1626	4032	765	1646	1336	1780	1753	2350	2131	3334	2188	1240
ENSMUSG00000063568	71	8	10	16	84	112	66	42	68	40	186	134	128	205	108	118	77	28	54	48	34	185	221	203	299	309	412	114
ENSMUSG00000063564	147	238	56	74	16	20	477	223	456	0	0	0	0	209	34	6	4	87	0	21	0	0	0	0	6	22	4	0
ENSMUSG00000063558	134	4	40	54	415	136	949	124	3107	0	2	0	4	0	0	36	62	1264	842	2	80	3384	384	334	1062	2396	83	4458
ENSMUSG00000063550	1326	803	462	797	847	560	613	168	408	290	849	530	469	411	164	1206	557	1047	710	1151	713	1137	619	458	549	541	823	289
ENSMUSG00000063543	709	682	802	690	889	2019	931	575	2254	451	1947	1281	778	816	368	494	1100	1560	548	845	650	1426	803	1183	1733	1307	1005	923
ENSMUSG00000063535	0	308	28	102	0	0	169	50	0	26	136	98	68	47	18	28	18	156	44	12	18	0	0	0	0	0	2	4
ENSMUSG00000063531	16	0	395	382	0	0	2	2	18	0	6	2	2	4	0	0	0	34	32	545	6	0	2	2	2	6	0	6
ENSMUSG00000063529	0	0	0	0	0	0	0	2	0	0	0	0	0	0	0	22	8	0	0	0	0	0	0	0	0	0	0	0
ENSMUSG00000063524	30328	59499	30605	46634	54095	94236	85223	47199	66103	22605	233966	191894	73832	26673	12946	29958	69975	54630	17816	39220	18997	29941	15475	20212	37189	34344	34903	11709
ENSMUSG00000063522	0	0	0	0	0	0	0	0	0	0	0	0	0	0	0	0	0	0	0	0	0	0	0	0	0	0	0	0
ENSMUSG00000063511	2895	3468	4663	4468	3180	5059	4102	2076	5411	1843	6977	4303	2256	2969	721	1792	3268	7339	4451	3955	3205	3471	5470	5620	4975	6081	5432	3635
ENSMUSG00000063507	0	0	0	0	0	0	0	0	0	0	0	0	0	0	0	0	0	0	0	0	0	0	0	0	0	0	0	0
ENSMUSG00000063478	0	0	0	0	0	0	0	0	0	0	0	0	0	0	0	0	0	0	0	0	0	0	0	0	0	0	0	0
ENSMUSG00000063458	95	48	10	0	24	38	120	14	10	42	62	52	48	32	6	24	36	14	185	14	90	12	10	10	8	14	4	44
ENSMUSG00000063457	6943	16568	12214	13324	9245	16174	7805	4765	29431	7234	35169	25980	13683	21286	5029	4906	12116	45903	11276	21613	14600	24321	11999	21646	26996	31645	16391	13912
ENSMUSG00000063455	274	158	204	263	181	46	30	14	68	32	176	144	140	108	74	30	44	62	81	22	32	168	144	107	121	252	475	94
ENSMUSG00000063450	724	692	863	1644	1014	722	462	197	878	102	2360	1309	635	753	265	311	371	176	970	395	1161	321	595	502	384	124	339	226
ENSMUSG00000063446	12	2	0	0	0	0	0	0	0	0	2	0	8	12	18	4	4	0	0	0	0	0	0	0	0	0	0	0
ENSMUSG00000063445	953	1331	507	341	95	206	461	301	1068	542	1180	916	683	1629	109	97	303	562	141	128	0	324	138	110	485	230	186	110
ENSMUSG00000063439	129	254	272	179	46	127	122	125	248	53	278	166	98	167	28	82	126	186	49	185	212	216	99	150	183	198	103	98
ENSMUSG00000063434	2	0	0	0	0	0	10	2	0	0	0	0	0	0	0	12	6	2	2	0	0	0	2	4	0	26	4	0
ENSMUSG00000063430	69	6	163	296	36	34	44	197	26	69	3334	3191	1320	163	58	0	0	4	1233	32	576	536	330	423	1724	1960	132	148
ENSMUSG00000063428	0	80	78	212	0	0	8	4	4	6	0	0	2	9	8	2	2	2	29	0	0	8	18	32	2	2	32	2
ENSMUSG00000063415	86	76	313	770	2	2	88	118	70	20	308	259	112	308	506	2	6	1287	559	525	130	174	22	32	292	118	18	52
ENSMUSG00000063410	2381	955	385	512	1619	1531	3049	1065	2352	430	3821	2911	1628	1429	391	1052	1467	1141	616	971	721	1124	1402	1433	1243	1035	1414	898
ENSMUSG00000063409	2	4	0	0	0	0	0	0	14	0	2	0	0	4	0	0	0	0	0	0	0	0	0	0	0	0	0	0
ENSMUSG00000063406	162	198	84	128	212	136	82	60	286	18	64	30	26	32	26	266	188	211	151	97	29	120	76	62	121	153	119	71
ENSMUSG00000063382	2333	2359	2482	2834	5222	3972	1662	769	3379	1663	7279	7225	3381	2740	1238	1910	2909	6288	2206	3878	3818	3762	2913	4343	3553	4212	6546	2517
ENSMUSG00000063362	255	85	73	110	84	66	112	30	106	33	178	90	143	102	64	108	108	276	108	72	72	74	50	58	62	50	66	46
ENSMUSG00000063358	657	1519	406	578	825	484	351	178	755	264	1016	641	575	349	183	574	413	1549	760	1618	638	1148	1142	907	861	871	1145	608
ENSMUSG00000063354	0	332	34	97	10	10	30	16	32	64	20	26	10	2	0	26	74	2	4	12	0	18	2	10	10	134	4	12
ENSMUSG00000063334	273	287	325	328	304	602	140	80	368	223	1651	1074	732	533	187	271	473	376	265	565	108	455	513	426	579	446	423	431
ENSMUSG00000063320	2	6	10	10	20	44	11	14	30	2	82	72	8	8	4	0	6	68	5	16	12	11	2	6	7	36	22	6
ENSMUSG00000063317	46	472	256	356	54	58	32	22	88	66	294	210	270	120	46	163	92	94	71	115	96	85	24	10	12	18	50	14
ENSMUSG00000063297	0	0	0	0	0	0	0	0	0	0	10	2	4	6	2	0	0	0	0	0	2	0	0	0	0	0	0	0
ENSMUSG00000063296	2	10	42	54	111	142	28	18	24	12	28	24	22	22	8	30	30	294	144	40	91	154	144	158	136	134	198	80
ENSMUSG00000063275	136	61	99	166	98	174	157	83	116	56	458	260	246	52	22	116	72	592	65	251	150	133	10	28	176	119	14	70
ENSMUSG00000063273	807	824	816	837	574	646	221	122	408	238	502	282	332	443	204	643	618	925	489	558	493	691	646	483	686	794	752	416
ENSMUSG00000063268	38	448	783	741	46	50	1480	450	98	73	649	486	732	78	64	139	428	1211	320	442	778	941	468	768	586	757	615	470
ENSMUSG00000063260	0	0	0	0	0	0	0	0	0	0	0	0	0	0	0	0	0	0	0	0	0	2	0	0	4	0	0	0
ENSMUSG00000063254	0	0	0	0	0	0	0	0	0	0	0	0	0	0	0	0	0	8	0	0	0	0	0	0	0	0	0	0
ENSMUSG00000063253	115	89	58	70	107	180	55	44	149	48	456	267	116	107	40	100	109	332	219	270	145	358	246	199	352	365	277	189
ENSMUSG00000063252	0	0	0	0	0	0	0	0	0	0	0	0	0	0	0	0	0	0	0	0	0	0	0	0	0	0	0	0
ENSMUSG00000063239	0	0	0	0	4	2	314	18	0	0	0	0	0	0	0	0	2	8	0	2	2	2	2	10	0	0	6	3
ENSMUSG00000063236	108	244	89	106	540	604	308	176	207	180	1387	976	587	537	134	140	278	904	228	333	80	398	372	495	588	604	396	309
[truncated: 14,817 more rows]

## Sheet: B. normalized log10 value
GeneID	Shrew.1	BigBrownBat.1	LittleBrownBat.1	LittleBrownBat.2	GuineaPig.1	GuineaPig.2	Porcupine.1	Porcupine.2	Chinchilla.1	Chipmunk.1	RedSquirrel.1A	RedSquirrel.1B	RedSquirrel.2	FoxSquirrel.1	FoxSquirrel.2	Beaver.1	Beaver.2	AfricanGrassRat.1	MeadowVole.1	CottonRat.1	WhiteFootedMouse.1	DeerMouse.1	DeerMouse.2A	DeerMouse.2B	DeerMouse.3A	DeerMouse.4	DeerMouse.5	DeerMouse.6
ENSMUSG00000104463	2.00183	1.96104	1.9401	1.88553	2.1689	2.10753	2.27375	1.97549	1.94603	2.21891	1.90923	1.90467	2.00904	2.13503	2.1125	2.16168	2.23176	2.1051	2.14807	1.95546	1.90624	1.94399	2.1789	2.04138	1.88075	1.89507	2.17382	2.14162
ENSMUSG00000104305	0.67751	0.36903	0.56026	0.73666	0.12158	0.20204	0.65468	0.31519	-0.12015	0.64991	1.16859	1.36558	1.18686	1.47443	1.31564	0.67301	0.62478	0.50609	0.3637	0.66935	0.20062	-0.05883	0.138	0.14483	-0.04483	0.29669	0.31738	0.1429
ENSMUSG00000104250	1.82565	1.47696	1.75013	1.76101	1.7381	1.75913	1.54795	1.61486	1.57666	1.99838	2.13877	2.16168	2.21049	2.46468	2.28166	1.849	1.79374	1.65097	1.7979	1.81589	1.83525	1.86499	1.85784	1.80399	1.92653	1.92246	1.77968	1.78927
ENSMUSG00000104043	0.30401	2.75963	3.04947	2.85434	1.88719	2.28301	2.35681	2.40765	2.57727	2.93991	2.75013	2.71612	2.6317	2.81265	2.64854	1.60535	1.96808	2.96366	2.77983	-0.52977	2.74821	2.78148	2.84762	2.79301	2.97777	2.86782	2.73044	2.86171
ENSMUSG00000103906	0.92284	1.25748	1.24145	1.1881	-0.01127	-0.13412	0.92451	1.00551	0.32127	1.10291	1.13311	1.28173	1.04895	1.1027	1.0395	1.02412	1.21826	0.82232	0.8067	0.81591	0.49795	0.75064	0.85448	1.15132	0.89694	0.78181	0.83136	0.77762
ENSMUSG00000103866	1.49052	1.81871	0.89009	1.24823	1.14655	0.91736	1.33059	1.44145	1.21363	1.35346	1.32895	1.26891	1.21853	1.22711	1.4194	1.07213	0.93358	1.05528	1.3145	0.79503	1.2936	1.8145	1.93269	1.53503	1.03309	1.82017	2.02039	1.48593
ENSMUSG00000103565	1.64542	1.78842	1.95608	1.89576	1.37673	1.5716	1.69705	1.62117	1.68782	1.87106	2.0753	2.10076	2.05191	2.00944	1.90846	1.85478	2.03994	1.6984	1.61886	1.8247	1.83051	1.68272	1.75802	1.86461	1.71771	1.75802	1.6984	1.73237
ENSMUSG00000103508	2.54281	2.81425	2.79968	2.8082	3.05407	2.9234	2.96143	2.85241	2.65373	2.70017	2.85683	2.83508	2.9182	2.84577	2.87897	2.8082	2.7587	2.58885	2.81425	2.92598	2.77199	2.80653	2.57359	2.4591	2.71921	2.67749	2.59147	2.62949
ENSMUSG00000103480	0.93251	1.30771	1.27873	0.91399	0.79708	0.57396	1.51295	1.53487	0.90107	1.93912	1.70698	1.68861	1.6786	1.85125	1.82978	1.14891	1.31602	2.13183	1.67796	2.10692	1.35645	1.5996	2.22002	2.18639	1.77706	2.03055	2.02545	2.07341
ENSMUSG00000103316	0.82626	0.95297	0.88376	0.92932	1.10239	1.10056	0.97847	0.98165	1.26148	1.1055	0.93756	0.83317	0.89293	1.34505	1.31961	1.33457	1.22514	0.85804	0.95179	1.21589	0.71055	0.78533	0.86902	0.85612	0.73314	0.57268	0.83667	0.72181
ENSMUSG00000103205	0.67331	1.41599	1.44804	1.48544	1.63446	1.8338	1.96168	2.03512	1.71023	1.6997	1.8145	1.8677	1.52985	1.04351	0.83764	2.10005	2.0287	1.98473	1.97098	2.0944	1.77826	1.73405	2.01681	2.01806	1.92596	2.10076	1.76998	2.10803
ENSMUSG00000103104	1.24346	1.64383	1.85964	1.62656	1.6478	1.691	1.68782	1.70102	1.43579	1.36519	1.44825	1.37937	1.42971	1.55924	1.65935	1.72219	1.59144	1.40779	1.67301	1.62459	1.76396	1.42722	1.66707	1.66623	1.60237	1.59065	1.64191	1.50659
ENSMUSG00000103019	2.48128	1.83836	2.13235	2.1183	1.67796	1.64581	1.87511	1.87063	1.75144	2.6102	2.5192	2.4805	2.66008	2.39947	2.42324	1.89997	1.93071	2.13454	1.79933	2.11715	1.8741	1.92578	1.53622	1.38957	1.59878	1.88171	1.91726	1.90846
ENSMUSG00000102976	1.82078	1.91783	1.86986	1.88013	1.75629	1.66336	2.2227	1.92578	1.73113	1.95259	1.91043	1.7945	1.88075	1.79209	1.88853	2.00635	1.97143	1.99937	2.21792	2.02818	2.32016	1.95774	2.2564	2.16567	1.99739	2.01478	2.06536	2.03553
ENSMUSG00000102720	1.38749	1.77195	1.59974	1.51963	1.22765	1.49115	1.60878	1.63461	1.59125	1.29864	1.56069	1.66456	1.53879	1.2936	1.09875	1.49702	1.62814	1.16224	1.39454	1.64489	1.03178	1.45949	1.37407	1.41446	1.52661	1.72849	1.31506	1.46534
ENSMUSG00000102671	1.14891	1.25519	1.02008	0.88066	0.55317	1.07465	1.44602	1.35441	0.98258	0.68849	1.22338	1.40966	1.12811	0.85448	0.57218	1.49423	1.44205	0.59325	0.46977	1.19551	0.92284	1.11126	1.26578	1.38867	1.04895	1.57512	0.65842	1.01896
ENSMUSG00000102627	0.32361	-0.78453	1.30898	1.39912	0.15302	0.333	1.38207	1.68356	0.06808	1.237	1.75227	1.79121	1.90195	1.31675	1.42429	1.08914	1.1808	1.37872	0.00107	1.14033	-0.45669	0.09615	0.57328	0.48835	0.07791	1.46406	0.2899	0.85888
ENSMUSG00000102455	1.57178	1.18862	1.36519	1.55924	0.74053	0.88299	0.81353	0.95441	1.44994	1.69876	1.73165	1.83344	2.03027	1.69745	1.82657	1.34781	1.65867	1.86031	2.3017	1.80492	1.88995	1.67249	1.80859	1.90092	1.54196	2.0552	1.77812	2.0463
ENSMUSG00000102252	2.13035	1.54604	2.14278	2.3525	1.36519	1.23964	2.22419	2.48574	1.11191	1.86858	2.2564	2.25515	2.41619	1.76739	1.90516	1.73568	1.87356	2.01293	2.21276	1.93475	1.14779	1.36322	1.67013	1.59924	1.4416	1.93941	1.43591	1.75444
ENSMUSG00000102049	1.12982	1.17144	0.03747	1.16319	0.60298	0.93324	1.16898	0.85546	0.5588	1.22179	0.73408	0.52365	1.27654	1.07277	0.90993	1.28734	1.34409	0.55218	1.34471	0.5772	1.43537	1.41972	1.14603	0.34294	-0.06204	0.9523	1.26976	0.26518
ENSMUSG00000101904	1.47923	-0.14831	0.02347	0.17664	0.668	0.41997	0.58937	0.06275	0.17078	1.05009	1.00081	0.83764	0.78953	0.91447	0.96872	0.93495	0.74156	0.61847	0.82656	0.51231	1.00861	0.63005	0.77864	0.7101	0.31866	0.24981	0.75877	0.53363
ENSMUSG00000101892	1.13246	1.40679	1.23946	1.22026	1.34741	1.4966	1.1263	1.01153	0.97963	0.85102	1.34422	1.31001	1.31961	1.01631	0.95394	0.61614	0.81788	1.63148	1.45325	0.67984	1.0564	1.37818	1.55733	1.53264	1.27719	1.34872	1.38189	1.48837
ENSMUSG00000101523	1.7313	1.93577	1.79013	1.83296	1.83772	1.67813	1.58342	1.4404	1.48037	1.70513	1.74162	1.63749	1.77841	1.69375	1.88719	1.637	1.52723	1.81538	1.63749	1.62991	1.69231	1.52764	1.72765	1.61959	1.63101	1.57627	1.70684	1.59647
ENSMUSG00000099481	0.74372	1.052	0.96033	1.01175	0.20929	0.10904	0.61118	0.50876	-0.00905	0.86326	0.4033	0.59211	0.53143	0.65242	0.74191	0.46977	0.7527	0.38236	0.83445	0.90133	0.72293	0.76941	0.9149	0.963	1.22026	1.03408	0.82721	0.89643
ENSMUSG00000099164	1.91536	1.88461	2.29588	2.18207	1.75565	1.86637	1.68086	1.81768	1.95916	1.89527	1.88568	1.78164	1.95774	2.05839	1.91926	1.90624	1.94419	1.85423	1.97965	2.11741	1.74204	1.83753	1.81258	1.77287	2.27493	1.91726	1.66336	1.83659
ENSMUSG00000099083	1.53442	1.42278	1.10028	1.27092	1.3695	1.14464	1.40999	1.15275	1.12867	1.18828	1.23681	1.30019	1.22811	1.25293	1.22811	1.36619	1.14869	1.1462	0.97557	1.37322	1.05528	1.3169	1.25104	1.14413	0.99017	1.14763	1.17276	1.13581
ENSMUSG00000099041	2.87897	2.25294	2.20343	2.12363	2.20437	2.04185	2.0816	2.14459	2.4571	1.89956	2.10566	2.15131	2.18713	2.12393	2.10437	2.18907	2.04464	1.93305	1.69564	1.9515	2.38928	2.19373	2.13747	2.16097	1.96635	2.09047	2.14647	1.96673
ENSMUSG00000098930	1.7136	1.68861	1.94542	1.91468	1.60686	1.69079	1.67676	1.73085	2.00398	1.67249	2.07081	2.06461	2.00482	1.74797	1.61112	1.8347	1.92737	1.8796	1.88233	1.81942	2.09649	1.97504	1.9081	2.01681	2.13877	2.23102	2.00565	2.08263
ENSMUSG00000098923	1.72348	1.54044	1.42278	1.36833	1.27477	1.17877	1.06538	1.14343	1.62227	1.33693	1.52429	1.42591	1.38173	1.06846	1.01555	1.32528	1.3915	1.45807	1.24166	1.63512	1.27575	1.19907	1.30019	1.29673	1.40695	1.27556	1.13729	1.40273
ENSMUSG00000098892	2.22034	1.85173	1.69889	1.67706	2.02656	1.89612	2.15565	2.18456	1.99678	2.14845	2.26537	2.22335	2.18384	2.18384	2.13994	2.10566	2.08056	1.80762	2.20758	1.71309	2.11791	2.01083	2.29954	2.29998	1.82829	2.01002	2.28263	2.34734
ENSMUSG00000098789	0.84162	1.22949	1.21869	1.06406	0.78181	0.85235	1.197	1.20199	0.88501	1.1555	1.19907	1.28765	0.97963	1.28869	1.3213	0.65719	0.76977	0.97557	0.82407	0.6227	0.84339	0.90337	0.65998	0.81664	0.87834	0.53734	0.842	0.61661
ENSMUSG00000098643	1.77826	1.71103	1.67523	1.71344	1.5396	1.36145	1.24145	1.31763	1.37937	1.70498	1.53843	1.49957	1.59935	1.69282	1.62038	1.62162	1.59294	1.49405	1.56748	1.66151	1.65248	1.66421	1.80675	1.72552	1.74055	1.64372	1.79982	1.67723
ENSMUSG00000098615	0.91419	1.4364	1.25835	1.30623	1.2962	1.4847	0.97751	1.46201	1.67569	1.55247	1.67191	1.68326	1.61186	1.32282	1.24393	2.02295	1.9293	1.60829	1.19551	1.27938	1.48957	1.47977	1.5212	1.72928	0.99429	1.67506	1.48544	1.8145
ENSMUSG00000098571	1.77968	1.82227	1.5471	1.48915	1.85173	1.85681	0.96584	0.15928	1.61174	1.69344	1.93991	2.07628	1.8351	1.93095	1.7438	1.92049	2.07465	1.54695	1.3414	1.74538	1.496	1.6918	1.51947	1.59031	1.55525	1.6997	1.64684	1.4608
ENSMUSG00000098546	1.92866	1.78089	1.60202	1.4856	1.53353	1.03219	1.12902	0.93779	1.31144	1.37374	1.56602	1.42733	1.42872	1.68833	1.67031	2.0016	1.78447	1.4738	1.57462	1.57085	1.61505	1.53669	1.7075	1.52519	1.37294	1.43181	1.78089	1.25781
ENSMUSG00000098488	0.85192	1.41656	1.47722	1.55811	0.74991	0.82037	1.18937	0.93284	0.62329	1.63677	1.43833	1.40075	1.16794	1.17743	1.20536	0.05761	0.28557	0.09246	1.10254	0.08983	1.28385	0.56026	0.76085	1.02806	0.58877	0.52012	0.91736	0.75587
ENSMUSG00000098387	0.54342	0.08269	0.23614	0.333	0.93228	0.97486	0.95072	0.73933	1.07257	0.29886	0.19125	0.14857	-0.1159	-0.34763	0.12346	0.24844	0.10605	0.44688	0.50098	0.65293	0.72076	0.34551	0.44509	0.47322	0.27576	0.37102	0.47166	0.42705
ENSMUSG00000098377	1.28195	1.49234	1.19679	1.31087	1.46257	1.47738	1.55207	1.70988	1.58586	1.80618	1.33821	1.31724	1.32373	1.31192	1.41954	1.44485	1.29229	0.98963	1.43464	1.17388	1.27832	1.10122	1.4087	1.4146	0.80439	0.98899	1.3213	1.31414
ENSMUSG00000098375	1.78002	1.18686	1.43804	1.27719	1.58999	1.68416	1.62524	1.67736	1.5205	1.45308	1.21082	1.26111	1.19079	1.18481	1.11846	1.75929	1.61435	1.50187	1.38927	1.63372	1.56871	1.59533	1.62656	1.67676	1.699	1.74071	1.47464	1.75988
ENSMUSG00000098301	1.39784	1.43	1.80148	1.83536	1.66565	1.56734	1.3133	1.30266	1.51915	1.52214	1.62951	1.47722	1.49346	1.54879	1.51761	1.70009	1.64958	1.71722	1.68531	1.57063	1.65832	1.62951	1.55976	1.46769	1.77369	1.76167	1.49921	1.45964
ENSMUSG00000098274	2.9971	3.00566	3.03404	3.03404	2.73441	2.90052	2.93991	2.86782	3.08134	3.0692	2.86994	2.84762	2.71612	2.80305	2.81919	2.93278	3.11954	3.01112	3.11954	3.06321	3.02123	2.96964	3.04675	3.03893	3.12614	2.98502	2.98928	3.04947
ENSMUSG00000098188	1.99678	1.51963	0.58519	0.43092	0.52417	0.72217	-0.69168	-0.26176	0.46614	0.79197	0.90368	0.78987	0.60197	0.54573	0.14483	1.28521	1.22202	0.41303	1.16773	0.27735	0.3637	-0.25669	0.40926	0.40665	0.21343	0.09615	0.61527	0.27174
ENSMUSG00000097909	1.56854	1.31657	1.72348	1.58062	1.12571	1.07982	1.16268	1.16244	1.5526	1.24553	1.50624	1.58529	1.5312	1.72944	1.3883	1.18339	1.1337	1.36092	1.15395	1.51726	1.16959	1.37921	1.44485	1.60927	1.56586	1.32163	1.48627	1.1149
ENSMUSG00000097829	2.4782	2.25004	2.00733	2.29311	2.78355	2.80494	2.50489	2.71394	2.75963	2.29692	2.39118	2.3808	2.42977	2.36113	2.44189	2.49953	2.3792	2.23578	2.00545	2.55589	2.53961	2.43997	2.24427	2.20959	2.32062	2.31804	2.12861	1.89576
ENSMUSG00000097771	1.66546	2.96611	2.74238	2.70527	2.36596	2.46468	2.37163	2.36158	2.3154	2.72818	2.5907	2.6434	2.58651	2.74057	2.62258	2.53891	2.67749	2.73296	2.69697	2.71291	2.64689	2.73721	2.79191	2.91114	2.58006	2.56624	2.75709	2.75259
ENSMUSG00000097721	1.7254	1.81396	1.88292	1.91356	2.32411	2.37115	1.90846	1.97119	2.09326	2.1796	1.8632	1.94301	1.9548	1.99251	1.90566	1.83883	1.92427	1.79288	1.73345	1.30171	1.55161	1.63906	1.61668	1.6973	1.63583	1.71394	1.56647	1.5738
ENSMUSG00000097629	0.4744	-0.00662	0.29437	-0.16601	1.42743	1.5339	1.6976	1.52842	1.5983	1.13729	0.89089	0.93988	1.01536	1.28145	1.33027	0.88862	1.09744	1.64728	1.45072	1.40833	1.27189	1.2405	1.31624	1.46852	1.45708	1.50534	1.33303	1.50894
ENSMUSG00000097508	1.11726	1.2181	0.68557	0.79881	1.08999	1.41562	1.13095	1.28942	1.21674	1.41989	1.68242	1.70388	1.54662	1.3419	1.35577	0.61939	1.01104	1.29229	1.15656	1.19183	0.88025	0.85988	0.92284	1.09328	0.84056	1.21232	0.87149	0.87745
ENSMUSG00000097485	1.20362	1.33193	1.30979	1.2409	2.06153	2.51199	1.39832	1.51543	1.703	1.44672	1.47208	1.58032	1.722	1.52917	1.47443	1.91702	1.94655	1.55057	1.46852	1.63197	1.53879	1.37597	1.50984	1.607	1.4132	1.56836	1.25929	1.43
ENSMUSG00000097394	1.34781	1.58928	1.30541	1.29099	1.43095	1.69777	1.54763	1.69705	1.85681	1.75537	1.72607	1.80637	1.73769	1.63847	1.48978	1.30451	1.40966	2.04496	1.60404	1.18561	1.36761	1.5146	1.48734	1.6639	1.38466	1.7025	1.52917	1.48144
ENSMUSG00000097328	1.67105	1.44873	1.59845	1.58982	1.75112	1.8946	1.80986	1.65918	1.27796	1.62149	2.01293	2.04338	1.60338	1.44322	1.39667	1.30592	1.61682	1.62582	1.61946	1.55507	1.51443	1.35117	1.29509	1.52468	1.25406	1.24865	1.46223	1.42076
ENSMUSG00000097319	2.13599	1.77168	1.81709	1.89181	1.94696	2.00714	1.94814	2.03819	1.98289	2.23102	2.15966	2.15565	2.17349	2.14776	1.92246	1.75708	2.00092	2.07944	2.25094	1.94561	2.28586	2.20463	2.31185	2.44189	2.15217	2.15997	2.40856	2.26908
ENSMUSG00000096740	1.19529	1.16361	0.86299	0.72334	0.87269	1.17834	1.30721	1.33544	1.45401	1.53927	1.53771	1.51745	1.48992	1.70024	1.65066	1.33632	1.57512	1.10122	1.02113	1.14085	1.07578	1.17345	0.88352	0.98138	1.30155	1.46852	0.87802	1.09696
ENSMUSG00000096472	0.26518	1.2936	1.22417	1.16031	0.58146	0.54453	1.22395	1.35612	1.24018	1.32357	1.39768	1.50523	1.56545	1.5212	1.05618	0.44185	0.77109	0.81062	1.1588	1.04351	1.30424	1.26204	0.99227	1.10191	1.40708	1.06846	0.8498	0.84087
ENSMUSG00000096458	-0.09152	1.38852	0.86939	0.85888	-0.01402	0.00107	-0.44503	-0.59299	0.20204	0.32274	0.6309	0.52225	0.72334	1.27422	1.10529	0.16253	0.26369	1.63327	1.58949	1.5879	1.92794	1.39037	1.89543	1.79951	1.54449	1.51047	1.74507	1.6463
ENSMUSG00000096361	1.65404	1.57366	1.7348	1.9805	1.64472	1.76213	1.50929	1.72373	1.89904	1.76213	2.06321	1.97278	1.91574	1.91153	1.84717	1.70443	1.73207	1.83695	2.00228	1.77826	1.82657	1.72407	2.01188	1.97676	1.87027	2.17273	2.0114	2.06562
ENSMUSG00000096351	0.94292	0.93636	1.48608	1.59343	0.78639	1.21313	1.42231	2.24355	1.3174	0.80869	1.42446	1.60251	1.68071	1.63041	1.42001	-0.13028	-0.11125	0.11624	1.34781	1.25467	1.55875	1.2821	1.05742	1.08633	0.97517	0.99604	1.05685	1.02077
ENSMUSG00000096210	2.25951	2.55589	2.69601	2.71751	2.31979	2.27711	2.11907	2.06621	2.27997	2.24122	2.15452	2.1779	2.14684	1.79736	1.52565	2.05954	2.10466	2.34806	1.98733	2.14366	2.4348	2.27598	2.93022	2.90527	2.44082	2.2498	2.75399	2.36646
ENSMUSG00000096199	1.27502	0.70648	0.94836	0.70876	1.22614	1.36776	0.56891	0.92429	1.49149	1.04856	0.91842	0.96135	0.82195	0.95935	0.95595	1.00769	1.17309	1.12409	1.26093	1.0464	0.9366	0.81881	0.89121	1.11106	0.95595	1.09563	0.89962	0.91711
ENSMUSG00000096188	1.3133	0.71358	0.34294	0.53529	0.77439	0.215	-0.33057	0.61661	0.35607	0.65126	0.71742	0.8351	1.00235	0.98603	0.94203	0.84496	0.57563	0.81631	0.56026	0.55266	1.17125	0.64192	0.80939	0.72708	-0.07794	0.43675	1.04401	0.29554
ENSMUSG00000096145	2.18975	1.81995	1.99783	1.85699	1.39883	1.58676	2.14618	2.21924	2.30963	2.11486	2.35899	2.30727	2.1261	2.04111	1.89428	1.89355	2.24008	1.86547	1.73746	2.19512	1.86229	1.93225	1.94734	2.04888	2.1209	2.40289	2.11881	2.02806
ENSMUSG00000095832	1.02985	1.31144	0.98633	1.0452	1.04027	1.23581	1.18582	1.01083	0.75101	1.07019	1.11638	0.96872	1.11106	0.74403	0.72748	1.11149	1.20569	0.88837	1.43438	1.06318	1.19881	0.84385	1.14569	1.09022	1.02008	0.99701	1.00529	1.20362
ENSMUSG00000095687	1.40981	2.3749	1.9655	1.98328	1.39213	1.58892	2.19965	2.20597	2.02317	2.22924	2.2516	2.28697	1.83104	1.52891	1.21745	1.84742	1.77732	2.11598	2.32969	1.6829	1.60587	1.89181	1.92614	1.91595	1.8095	1.69301	1.83192	2.11811
ENSMUSG00000095595	1.38239	1.41769	1.29516	1.32426	1.50321	1.66982	1.4345	1.59845	1.91574	0.519	1.15112	1.14379	1.18395	0.89401	1.06318	1.42248	1.20661	1.58018	0.81243	0.9806	1.92191	1.40212	1.28901	1.26357	1.34343	1.53656	1.19551	1.5146
ENSMUSG00000095567	2.05662	2.00348	2.28049	2.23485	1.92464	1.88292	2.32062	2.36362	2.27711	2.46511	2.263	2.26038	2.30997	2.40345	2.21635	2.2516	2.32411	2.05633	2.04864	2.11907	1.99133	1.96104	2.06808	2.01658	2.0375	1.9068	2.01319	1.96635
ENSMUSG00000095464	1.52677	1.44265	1.53322	1.47707	1.43181	1.82627	1.62297	1.73286	1.66763	1.57904	1.5822	1.60829	1.43833	1.45038	1.47853	1.5081	1.52634	1.53152	1.28856	1.41753	1.24498	1.03467	1.26378	1.37616	1.35695	1.64845	1.12937	1.37937
ENSMUSG00000095463	1.17678	1.47871	1.11708	1.54026	1.79632	1.55608	1.81091	1.54026	1.87912	1.30965	1.31998	1.24675	1.43159	1.54748	1.7654	2.23485	2.08636	1.68782	1.92151	1.97187	1.72944	1.91857	1.86442	1.82546	1.78089	1.99639	2.0851	2.01059
ENSMUSG00000095440	0.53665	0.79384	-0.07794	0.30827	1.00687	0.77836	0.78161	0.86299	0.647	0.15455	0.43956	0.55266	0.56675	0.95679	1.07754	0.49878	0.36106	0.40148	0.22568	0.85523	-0.39298	0.18206	0.42372	0.58519	0.05445	-0.04906	0.50445	0.33977
ENSMUSG00000095304	2.05954	0.60298	0.77988	0.64397	1.08876	1.33073	1.24329	1.9548	0.97847	2.16055	1.85614	1.91502	1.55959	1.30079	1.35391	0.28709	0.25298	1.94717	1.54388	1.65097	1.5418	0.8789	0.18341	0.08514	-0.23585	-0.08439	-0.00222	-0.27314
ENSMUSG00000095115	1.32733	1.29065	1.06318	1.20179	1.51122	1.19413	1.31485	1.36383	1.28369	1.35662	1.64542	1.71232	1.74874	1.47665	1.54492	1.39422	1.22371	1.29729	1.36519	1.41102	1.23824	1.59878	1.35374	1.21706	1.28785	1.49149	1.39103	1.38734
ENSMUSG00000095098	1.90659	1.25087	1.55794	1.55144	1.58833	1.93377	1.30313	1.45514	1.66496	1.43788	1.69248	1.75947	1.41738	1.56209	1.46587	1.43049	1.73865	1.62935	1.96168	1.74114	0.9516	1.9515	1.88326	2.06858	2.07601	1.89665	1.90179	1.99133
ENSMUSG00000095028	1.3554	1.37112	1.6625	1.22872	1.8232	1.5714	1.49264	1.6918	2.39855	0.99892	1.61004	1.7025	1.52201	1.92695	1.75504	1.12429	1.42657	1.56989	1.75988	1.78179	1.2663	0.1636	-0.67244	-0.76648	0.44602	-1.68499	0.06489	0.49569
ENSMUSG00000094973	2.31185	2.1696	2.31222	2.2608	2.1097	2.17204	2.15337	2.18416	2.19995	2.41808	2.24325	2.22239	2.20343	2.28166	2.27318	2.20437	2.29052	2.09069	2.2608	2.25434	2.1919	2.14187	2.23209	2.18607	2.27525	2.10943	2.13694	2.20566
ENSMUSG00000094935	0.98676	0.73269	0.32442	0.31519	0.82758	0.82721	1.0996	1.01773	1.0452	0.61219	0.68719	0.64087	0.41303	-0.00905	0.17428	0.68901	0.76266	0.75877	0.4033	0.88894	0.73106	1.07187	1.08688	1.3299	1.05159	1.38957	1.18036	1.21064
ENSMUSG00000094870	1.41675	1.38069	1.36468	1.35645	1.35017	1.19881	1.01982	1.06825	0.80698	1.31068	1.12297	1.09839	1.00529	1.07366	0.99604	0.99107	1.06341	1.23637	1.51017	1.37692	1.21944	1.12793	1.27595	1.26341	1.30472	1.28802	1.26694	1.41057
ENSMUSG00000094685	1.34218	1.0588	1.07142	1.00506	1.19039	1.35206	1.24346	1.20971	1.35391	0.98036	1.13634	1.12317	0.92429	0.86059	1.04895	1.17834	1.25854	1.29046	1.14033	1.27027	0.94265	1.09875	1.08101	1.09455	1.19645	1.11828	1.01859	1.24823
ENSMUSG00000094649	1.21655	1.10412	1.30193	1.15674	0.83574	0.9919	0.99862	0.97938	1.21128	1.35762	1.26679	1.24553	1.1049	1.19242	1.12207	1.08039	1.19395	0.92691	0.89484	0.77596	0.79881	0.49878	1.2105	1.22653	0.95935	0.93756	1.09022	0.90622
ENSMUSG00000094483	0.92184	1.09125	0.88458	1.05051	1.08756	1.03826	1.02958	1.01728	1.32426	1.24166	1.34798	1.3143	1.1586	1.21183	1.13291	1.34394	1.23556	0.96584	1.12297	1.10317	0.94981	0.94604	0.86354	0.92747	0.82142	0.81555	1.08289	0.98785
ENSMUSG00000094130	1.09744	0.90054	1.00106	0.98548	0.73008	0.72076	1.10936	1.18705	0.84604	1.28964	0.56891	0.40244	0.38423	0.31626	-0.14375	1.10749	1.12721	0.72076	1.04686	1.20895	0.85661	0.53022	0.70831	0.78227	0.87802	0.7318	0.62731	0.9695
ENSMUSG00000094114	0.37597	0.67301	0.37179	0.12158	0.20204	0.4373	0.10714	-0.20708	0.58096	0.32536	0.38505	0.04963	0.1636	0.08269	0.28847	-0.31505	-0.02243	0.31626	0.66975	0.22198	0.18206	0.01459	0.35215	0.32361	0.29069	0.47965	0.42782	0.29341
ENSMUSG00000093989	1.76618	2.11193	1.70885	1.85844	1.87255	2.20984	2.1131	2.19995	2.17114	1.98819	2.02234	2.12641	1.97205	1.99018	1.99303	2.0329	2.00796	2.24948	1.87536	2.32181	1.7452	1.8939	1.95633	2.2147	1.87666	1.94282	2.01948	1.99503
ENSMUSG00000093930	2.3017	2.58733	2.77199	2.63977	1.69823	1.25725	1.32163	1.49687	1.92324	2.18674	1.4146	1.26613	1.69442	1.83396	1.85723	2.30611	2.10399	1.7381	2.26967	1.65867	2.14807	1.74623	1.47991	1.41545	1.61486	1.63611	1.2722	1.77423
ENSMUSG00000093904	1.90213	1.90092	2.06921	2.01847	1.69615	1.82909	1.41393	1.44337	1.98488	1.99639	1.98713	1.91485	1.89921	1.93288	1.79121	1.85141	1.80052	2.15275	2.16718	2.15337	2.50653	2.19923	2.16531	2.0854	2.26537	2.30128	2.2147	2.23983
ENSMUSG00000093752	1.63088	1.3533	1.40132	1.36383	1.70232	1.74825	1.60138	1.47853	1.50827	1.86189	1.75754	1.67829	1.71996	1.60106	1.5845	1.3808	1.46703	1.78635	1.37536	1.79525	1.38927	1.22556	1.5258	1.56053	1.48978	1.61616	1.48427	1.66013
ENSMUSG00000093445	1.94471	2.08562	2.05839	2.13653	1.82095	1.83969	2.00302	1.99133	2.03899	2.00424	2.06704	2.14932	2.00545	2.00302	1.92524	1.84777	1.94878	1.82182	1.75802	1.80722	1.93577	1.7723	1.8529	1.98882	1.91857	1.77717	1.68922	1.92888
ENSMUSG00000092607	1.29229	1.23785	1.17598	1.23771	1.42476	1.65053	1.1778	1.24111	1.58048	1.6392	1.19754	1.25568	1.06538	1.13795	1.14435	1.05902	1.1166	1.42591	0.99505	1.29708	1.23323	1.47552	1.42706	1.60711	1.4587	1.38507	1.50412	1.43242
ENSMUSG00000092558	1.21256	0.87745	1.03706	0.93165	1.09583	0.64434	0.51825	0.44981	0.61162	-1.50559	1.03329	1.01653	1.04569	0.73373	0.90368	1.11358	1.14486	1.03384	1.09875	1.35134	0.96787	1.13795	1.13672	1.31055	1.09067	1.1588	1.25087	1.16859
ENSMUSG00000092417	1.62415	1.85614	1.89527	1.68396	1.28923	1.41069	1.7166	1.79632	1.2964	1.78464	1.72157	1.72458	1.71003	1.69548	1.63472	1.56765	1.7654	1.42017	1.99439	1.47339	1.44578	1.6895	1.86423	1.97942	1.75674	1.74797	1.75144	1.67796
ENSMUSG00000092116	1.90285	1.84058	2.17382	2.06221	1.38494	1.69199	1.86547	1.97205	2.47757	2.04605	2.03776	2.03899	2.10774	1.69989	1.73701	1.82353	2.03796	2.04268	1.8258	2.12422	2.04295	1.93815	1.93337	1.99527	2.07573	2.38728	1.86246	2.01847
ENSMUSG00000092035	0.78757	-0.37415	0.63306	0.46562	0.68765	0.86939	-0.18535	-1.06296	0.90589	1.34451	1.83557	1.86696	2.22451	1.5772	2.37361	0.44981	0.68064	0.11811	0.8667	0.61527	1.26996	1.03109	0.7157	0.71657	2.01124	2.21399	1.13059	1.91105
ENSMUSG00000091964	1.49889	1.81538	1.46977	1.61268	1.39754	1.48675	1.66546	1.53712	1.34951	1.49641	1.58062	1.64958	1.54044	1.53353	1.5473	1.20518	1.29781	1.21433	1.4059	1.13564	1.07837	1.22832	1.30326	1.36655	1.26875	1.38927	1.32322	1.43683
ENSMUSG00000091900	1.33836	0.79431	1.03467	1.07257	0.94164	1.02008	0.82993	0.73666	1.01394	0.77887	0.8501	0.72843	0.81881	0.97086	0.51423	1.51655	1.37243	0.9552	1.23486	1.3404	1.18775	1.16224	1.11846	1.08412	1.41155	1.089	1.13547	1.20661
ENSMUSG00000091811	0.21965	0.54206	-1.87389	-0.09572	0.52225	0.7707	0.5644	0.62417	0.84433	0.59766	0.41543	0.7445	0.27922	1.2604	1.10995	0.38236	0.85579	1.04439	0.64434	0.96459	0.55802	0.71275	1.01338	1.21551	0.89121	0.93051	1.15132	1.04378
ENSMUSG00000091803	0.62516	1.19162	1.42743	1.3888	0.96634	1.24381	0.83839	0.97847	1.39832	1.53339	1.0315	1.24393	0.98923	1.03623	0.88587	0.85395	1.11573	0.98287	0.8354	0.84672	0.89572	0.52168	0.8777	0.83408	0.71055	1.12246	0.76538	0.99332
ENSMUSG00000091780	1.00861	1.33723	1.26809	1.23359	1.41954	1.57004	1.33771	1.48352	1.62582	2.73441	1.5409	1.58324	1.36871	1.5456	1.52625	1.78909	1.92866	1.68988	2.15337	1.17327	1.76739	1.68211	1.73207	1.85859	1.7381	1.67285	1.75629	1.5702
ENSMUSG00000091625	1.14486	0.59378	1.03904	0.94573	1.15242	1.56193	1.12409	1.27518	1.55924	1.22042	1.40005	1.33073	1.20216	1.36	1.11015	0.99073	1.13152	1.04056	1.12448	1.20995	1.09284	1.27336	1.19979	1.30313	1.55457	1.36058	1.12902	1.23621
ENSMUSG00000091537	1.90143	1.825	1.93851	1.91991	1.40241	1.72704	1.73908	1.95223	2.03537	1.691	1.83914	1.89373	1.73497	1.6973	1.65404	1.83241	2.03055	1.85205	1.6829	1.863	1.46964	1.89114	1.80938	1.78927	1.91726	1.90092	1.59051	1.80762
ENSMUSG00000091337	1.67888	1.50894	1.76475	1.88795	1.72765	1.68861	1.5383	1.55316	1.27303	1.23556	1.82713	1.69356	1.66168	1.1923	1.26679	1.48692	1.47507	1.94282	2.08242	1.6233	1.84463	1.83241	1.81019	1.83678	2.02084	2.18713	1.93095	2.03796
ENSMUSG00000091277	1.08101	1.61159	1.49374	1.50882	0.42372	0.54892	0.84412	0.85988	0.73591	1.16411	0.94753	1.00475	0.99478	0.74372	0.65663	0.98138	0.98469	1.25406	1.06941	1.2821	1.43804	1.19529	1.23486	1.21745	1.39629	1.35312	1.10447	1.35905
ENSMUSG00000091264	0.77176	0.08774	0.14095	0.16949	-0.71505	-0.24305	0.04963	0.33743	0.41303	0.41303	0.50876	0.72517	0.3361	1.13616	1.31817	0.69532	0.84604	0.50032	-0.08439	-0.03166	0.3361	0.42878	0.05532	-0.23585	0.18206	0.46104	0.1853	0.10605
ENSMUSG00000091243	0.75877	1.85159	1.73113	1.96436	1.96185	1.95754	2.18345	2.07944	1.5789	1.82657	1.47853	1.39437	1.71166	1.85478	1.90302	1.8891	1.56545	2.09546	1.11774	0.98389	1.28885	1.28817	0.96196	0.74403	0.75776	1.06738	0.97144	1.25663
ENSMUSG00000090958	2.46963	2.25121	1.61475	1.089	2.3808	2.06426	1.21423	1.28063	0.99529	1.96237	0.90078	1.10174	1.52103	1.64489	1.69115	0.35607	-0.1396	2.00006	1.5007	2.20343	-0.04906	1.15604	0.63697	0.66104	1.05666	0.48988	-0.61062	0.85295
ENSMUSG00000090946	0.8504	0.68351	0.54206	0.11465	0.89643	0.87802	0.37903	0.39266	0.38807	0.32882	1.20518	1.28856	0.95365	0.87745	0.71837	0.37597	0.20641	1.01751	0.519	0.53022	1.0636	0.55025	0.46258	0.6158	0.29669	0.62096	0.58698	0.58877
ENSMUSG00000090935	0.7117	0.41997	0.68639	0.45105	0.56626	0.74338	0.73408	0.8169	0.10714	0.60337	0.8733	0.80067	0.73106	0.39509	0.87859	0.47916	0.12685	0.95072	0.85988	0.72926	0.65719	0.31866	0.4744	0.35988	0.09246	0.41468	0.53363	0.18341
ENSMUSG00000090862	2.85241	2.84923	3.03893	3.08758	2.73821	2.85683	2.77199	2.77831	3.02743	2.96964	2.75568	2.81092	2.7896	2.84381	2.74238	2.87897	3.03628	2.96143	2.95329	2.97511	2.98351	3.14335	3.08134	3.15441	3.08758	3.19645	3.08758	3.1113
ENSMUSG00000090733	2.99397	2.95608	2.97251	2.93278	2.85683	3.03123	2.85093	2.72496	2.99162	3.08134	2.91614	3.00784	3.10214	3.03404	3.05161	2.99397	3.12932	2.99162	2.79191	2.93022	2.86568	2.93478	2.99397	3.04163	3.0692	2.96143	2.96611	3.05161
ENSMUSG00000090626	0.65036	-0.10362	-0.17647	0.29209	0.24844	0.66574	0.41468	0.25587	0.83944	0.47571	0.31866	0.47387	0.31978	1.14655	0.8302	0.13242	0.11465	1.02985	-0.31505	0.87632	1.12409	0.378	1.0188	0.94949	0.89664	0.75128	0.69911	0.56094
ENSMUSG00000090553	1.51902	1.55875	2.12641	2.01828	1.29165	1.60154	1.47013	1.71041	1.83914	1.572	1.57125	1.57562	1.37016	1.63068	1.47396	1.60092	1.6398	1.82135	1.58342	1.80794	1.70195	1.66305	1.68211	1.74658	1.94046	1.82755	1.60106	1.70316
ENSMUSG00000090523	1.43159	-1.87389	0.43023	0.53279	1.82796	1.65191	0.91053	0.88862	1.51639	0.38946	1.09125	1.13333	1.05545	1.10686	0.97144	0.25587	0.47571	0.9299	1.07733	0.68639	0.52835	0.10303	0.43888	0.51101	0.44185	0.19125	0.53474	0.52552
ENSMUSG00000090451	3.11373	3.22344	3.40317	3.38105	2.83071	2.96366	2.83264	2.92025	3.12207	3.1113	2.91316	2.93478	2.85241	3.05726	3.01599	2.96611	3.17631	3.11373	3.09661	3.01355	2.95329	3.03893	3.12614	3.09001	3.13583	3.07794	3.07794	3.09964
ENSMUSG00000090394	0.74156	-0.34763	0.32536	0.38807	0.34227	0.06128	0.58415	0.76714	-1.13074	-0.1396	0.52417	0.63601	0.54838	0.81911	0.64192	0.52225	0.42198	0.36789	0.45847	0.45297	0.36433	0.34864	0.51703	0.41303	0.28328	0.05532	0.50876	0.38354
ENSMUSG00000090290	1.32514	1.80637	2.38673	2.12573	1.85423	1.86002	1.58261	1.59583	1.38364	1.66077	1.90733	1.92718	1.75175	1.57512	1.33122	1.41202	1.64728	0.96431	1.30786	1.00529	1.47923	1.02328	0.93636	1.05309	1.23266	1.16122	0.98944	1.03219
ENSMUSG00000090266	1.45135	1.06615	1.36398	1.16063	1.12225	1.34471	1.05227	1.05431	1.48627	1.63237	1.78464	1.71023	1.68356	1.51902	1.64302	1.13634	1.35162	1.56748	0.91736	0.88557	1.12485	1.2178	0.93051	0.95472	1.13353	1.3955	0.89664	1.38136
ENSMUSG00000090264	1.50929	1.02146	1.57579	1.21423	0.28103	0.74096	0.88066	1.1906	1.0113	1.42793	0.15614	0.48777	-0.219	0.36983	0.23949	0.60298	0.95757	0.81389	0.53918	0.30827	0.70482	0.75813	1.21064	1.20344	0.78885	0.91447	1.24612	1.04569
ENSMUSG00000090262	1.40273	0.91736	0.45643	0.37102	0.47091	0.62621	0.76669	0.92956	0.52225	1.06021	0.73842	0.78639	0.75503	0.82691	1.0315	0.60383	0.78418	1.20161	1.53927	1.14379	1.1726	1.13774	1.08717	1.12317	1.24301	1.39454	1.15689	1.39262
ENSMUSG00000090247	1.96693	1.81277	1.89978	2.04241	1.50794	1.64922	2.03367	2.09619	2.24752	1.62725	1.7025	1.71695	1.5511	1.74087	1.5928	1.46756	1.60553	1.65679	1.69777	1.65798	1.9898	1.99739	2.18237	2.31979	1.99838	2.01525	2.09196	2.04185
ENSMUSG00000090231	1.27422	1.15998	1.18705	0.80581	1.69523	1.73769	0.33172	-0.04483	0.79197	0.36689	2.09019	2.10027	1.69344	-0.06204	0.62621	0.36183	0.55932	1.44021	1.21767	1.12591	2.79473	-0.97204	0.24717	0.29341	0.46258	0.13242	0.821	2.04161
ENSMUSG00000090213	1.63551	1.72104	1.90753	1.59603	1.81625	2.01235	1.48451	1.58928	1.63427	1.90643	2.03413	2.10884	2.06894	1.8315	1.83492	1.82135	1.91067	2.05925	1.78964	2.00671	1.66607	1.96992	1.88341	2.00957	1.99901	1.87912	1.8315	1.82732
ENSMUSG00000090150	0.94517	1.32241	1.28565	1.39227	1.51601	1.3174	1.61717	1.49735	0.66649	1.07982	1.37163	1.27575	1.24314	1.14085	1.07187	0.94546	0.99552	1.37322	1.81072	1.33649	1.44764	1.41503	1.52387	1.47837	1.2446	1.42706	1.53217	1.54264
ENSMUSG00000090115	0.36601	0.34765	0.11811	0.215	0.57563	0.43356	0.68012	0.58638	0.20463	-0.02243	0.23277	0.44032	0.37597	0.45297	0.33876	-0.0721	0.44428	0.48338	0.45582	0.8733	0.56565	0.76472	0.77337	0.70754	0.79746	0.65413	0.81417	0.67166
ENSMUSG00000090112	1.58487	1.14413	1.14072	1.44735	1.59125	1.41599	1.27477	1.05685	1.04335	1.17125	1.28734	1.19018	1.2446	1.31801	1.32282	1.20199	1.20362	1.07882	1.10529	1.21433	1.78483	1.53727	1.5897	1.40302	1.27502	1.42857	1.56519	1.47991
ENSMUSG00000090110	0.58467	0.82267	0.65617	0.51101	-0.1159	0.77556	0.77864	0.71962	0.55603	0.07479	0.5055	0.53977	0.25298	-0.15348	-0.03506	0.0766	0.15928	0.21343	0.15058	0.17811	0.14483	-0.54111	0.28004	0.42372	-0.00905	0.1104	0.43023	0.10714
ENSMUSG00000090100	1.09047	0.8618	0.48198	0.67628	1.0412	0.93495	1.10191	0.86267	1.0976	0.8308	0.77176	0.74991	0.91144	0.58698	0.65293	1.03197	0.69453	1.03178	0.70545	0.64892	1.03484	1.0217	0.78885	0.35298	0.30401	0.86205	0.98856	0.45297
ENSMUSG00000090084	2.14162	1.69375	1.04312	1.40853	1.41807	1.33267	-0.27314	0.46855	1.6432	1.74843	1.94168	1.93392	1.74026	1.74747	2.07509	1.29955	1.33922	1.65619	1.90753	2.38817	1.40999	2.20251	2.01925	2.01478	2.01429	2.03724	2.41434	2.03112
ENSMUSG00000090083	1.3536	1.29381	1.26185	1.2962	1.64434	1.63237	1.38507	1.31961	1.5016	0.76042	0.96377	0.97144	0.9525	0.86205	0.96163	1.24215	1.30757	1.5604	1.38651	1.69945	1.73967	1.42476	1.70529	1.6619	1.56109	1.46435	1.67846	1.51867
ENSMUSG00000090077	-0.00222	0.29069	-0.19114	0.1293	0.76352	0.66935	0.08774	-0.46599	0.46562	0.5249	0.93528	1.03524	0.73933	0.85395	0.53426	0.36789	0.8853	1.14803	-0.00456	0.80785	0.78017	0.60741	1.26838	1.27491	0.68765	0.87107	1.29942	1.07428
ENSMUSG00000090035	0.6268	0.66427	0.93495	0.85488	0.57509	0.43956	0.28847	0.4744	0.86552	0.30401	0.30544	0.06275	0.22342	0.38601	0.59592	0.74296	0.59487	0.94459	1.09982	1.06113	1.13353	1.27908	1.2178	1.10254	1.16224	1.05377	1.23154	0.91209
ENSMUSG00000090000	1.29178	0.98575	1.22832	1.11546	1.36274	1.63101	1.13815	1.16662	1.33632	1.15736	1.4506	1.35916	1.39712	1.21932	1.22854	1.34343	1.2966	1.66529	1.36558	1.45857	1.30234	1.20916	1.08859	1.16452	1.47516	1.63197	1.12506	1.29165
ENSMUSG00000089984	0.4425	0.7445	0.5644	0.08269	-0.23585	-0.16601	0.2274	0.27922	0.44781	1.16319	0.79678	0.90156	0.54892	0.25136	0.49131	0.27026	0.61894	0.79746	0.04963	-0.11125	0.1978	-0.02755	0.6309	0.70876	0.39015	0.605	0.42515	0.63647
ENSMUSG00000089917	1.80532	2.21945	1.61594	1.65749	1.36734	1.36574	1.53373	1.64077	1.83331	2.15733	2.09725	2.18778	2.04909	2.16567	1.97249	1.77369	2.04209	1.73834	1.72521	1.66124	1.50187	1.5281	1.91874	1.89507	1.44236	1.80117	1.87843	1.78814
ENSMUSG00000089911	1.67623	1.94696	1.93967	1.90753	1.64043	1.57512	1.51212	1.50866	1.59051	1.66529	1.69033	1.58544	1.7679	1.59084	1.584	1.83859	1.81886	1.71215	1.51726	1.5541	1.703	1.57992	1.57904	1.42692	1.53516	1.36468	1.55976	1.5468
ENSMUSG00000089872	1.3568	1.59732	1.42248	1.60221	1.94399	1.78142	1.40024	1.57904	1.48287	1.17518	1.36725	1.33922	1.52316	1.44918	1.67536	1.39262	1.32979	1.55193	1.47649	1.50237	1.37723	1.53101	1.46669	1.42971	1.28688	1.43493	1.47148	1.38375
ENSMUSG00000089837	1.77245	1.12336	1.59668	1.62636	0.60154	0.20795	0.99017	0.81911	0.59378	0.96692	1.40289	1.61874	1.29285	1.19345	1.23964	0.93051	0.78928	0.4033	1.34609	1.46636	0.16722	0.61294	0.15811	0.40434	0.91674	0.24232	0.34644	0.20929
ENSMUSG00000089832	2.09196	2.02886	2.20791	2.06833	1.75851	1.8594	2.43097	2.50489	1.87763	2.02806	1.95833	2.01497	2.02105	1.99392	1.90017	2.03481	2.13813	1.86372	1.93392	1.80458	1.71327	1.91783	2.34607	2.5108	1.83012	1.98667	2.05732	1.79434
ENSMUSG00000089824	1.89339	1.84794	1.81001	1.78943	1.78927	1.75835	1.77633	1.64223	1.5456	1.94696	1.72552	1.66168	1.94717	1.85355	1.78718	1.89796	1.74204	1.41844	1.61538	1.70164	1.64302	1.55535	1.71292	1.53373	1.59178	1.62022	1.59353	1.68226
ENSMUSG00000089762	1.46756	1.9102	2.15026	2.2392	1.7206	1.78993	1.855	1.90697	1.69548	1.83836	1.43348	1.48854	1.41333	1.75615	1.39406	1.05109	1.5702	1.82332	1.6125	1.55247	1.24782	1.22317	1.50708	1.76552	1.61616	1.40736	1.64123	1.63797
ENSMUSG00000089704	2.11881	2.39372	2.5211	2.52629	2.17697	2.0375	2.08242	2.09469	1.93392	2.2614	2.41808	2.49501	2.32146	2.27598	2.42032	2.15997	2.26111	2.4782	2.17501	2.19479	2.12328	2.3017	2.08562	2.12422	2.16135	2.14905	2.18807	1.96026
ENSMUSG00000089682	1.06259	1.12695	0.76538	0.7723	1.22101	0.99002	1.17125	1.24481	0.89643	0.77405	1.12354	1.06099	1.03725	0.92409	0.52168	0.9695	0.78047	1.197	1.15378	1.16708	0.89457	0.75663	1.00156	0.96608	0.87932	0.93228	0.95875	0.99107
ENSMUSG00000087687	1.17345	1.38302	1.63627	1.56279	1.01104	1.48808	1.36915	1.68833	1.3852	1.54547	1.55733	1.63327	1.48247	1.40024	1.386	1.25448	1.33693	1.46355	1.14085	1.11774	1.10375	1.08365	1.45135	1.52403	1.326	1.37049	1.30451	1.39629
ENSMUSG00000087260	1.564	1.28542	1.52187	1.45842	1.42459	1.62884	1.40398	1.3915	1.67493	1.60304	1.3419	1.35846	1.26357	1.45174	1.54835	1.34375	1.53086	1.52033	1.47516	1.59084	1.06099	1.19216	1.26075	1.23852	1.26856	1.20317	1.17919	1.38911
ENSMUSG00000086938	1.52648	1.70611	1.65003	1.60988	1.63859	2.05055	1.65959	1.96274	1.8191	1.5702	2.04209	2.08562	1.81643	1.65147	1.42643	1.51279	1.61779	1.79013	1.73769	1.62176	1.62203	1.65472	1.76329	1.84195	1.71232	1.6639	1.699	1.58544
ENSMUSG00000085795	1.35441	0.83445	1.13021	1.28195	0.86815	0.90107	0.43356	0.2347	1.20661	1.76409	1.498	1.64372	1.28129	1.77954	2.06262	2.14845	2.02419	2.12479	1.92447	1.47753	1.2676	1.66565	1.62415	1.84848	1.69301	1.54604	1.58874	1.57212
ENSMUSG00000085793	0.56383	0.36505	0.45047	0.37236	0.26647	0.43888	0.26026	0.58467	0.91992	-0.37415	0.2274	0.37102	0.42114	0.15811	0.30332	0.14857	-0.31505	0.28198	0.5625	0.38354	0.54686	0.1429	0.54786	0.37697	0.33474	0.23797	0.12158	0.44981
ENSMUSG00000084957	1.02304	0.61738	0.27735	0.09246	1.2026	1.52764	0.00419	0.4263	0.99787	1.16516	1.44937	1.40708	1.35	1.08756	1.04168	0.79024	0.76147	0.97254	0.52012	1.03197	0.92806	0.87107	1.19281	1.33754	1.08559	1.24346	0.98603	0.89009
ENSMUSG00000084883	0.64847	0.32648	0.72926	0.65562	1.5339	1.39295	0.19486	0.3934	1.36383	0.73591	0.34227	0.48835	0.11292	1.0026	0.70711	0.26766	-0.38153	1.12246	0.62731	0.64087	0.85546	1.37337	0.90523	1.094	1.2039	1.31414	0.94164	1.42574
ENSMUSG00000084786	1.70102	1.41695	1.80052	1.85141	1.66406	2.16367	1.76121	1.90285	1.87743	1.64335	1.98642	2.0293	1.70713	1.61959	1.63315	1.14779	1.48608	1.63949	1.64357	1.6457	1.3419	1.53759	1.75521	1.78016	1.67176	1.81413	1.64845	1.83897
ENSMUSG00000083649	2.22002	2.58077	2.7204	2.67425	2.52284	2.65712	2.16467	2.30433	2.6111	2.47591	2.43562	2.45015	2.50146	2.64604	2.54051	2.5488	2.5135	2.4571	2.51199	2.72127	2.56895	2.47929	2.2426	2.17735	2.73902	2.40174	2.23609	2.28134
ENSMUSG00000083282	2.23251	2.16467	1.78142	1.82387	2.36889	2.42685	2.67425	2.68219	1.44089	2.70886	2.29507	2.37264	2.34607	2.28096	2.26224	1.87213	1.94301	1.84684	2.0329	1.88604	1.67752	2.03181	2.10206	2.14776	1.94071	1.96369	2.26572	2.10486
ENSMUSG00000081534	1.02744	1.60018	0.94728	1.26856	1.79434	1.99209	1.32691	1.26148	2.03947	0.53143	1.54291	1.58248	1.58206	1.21256	1.197	1.64286	1.48338	1.91783	1.78483	2.12273	1.27303	1.77826	1.56618	1.65472	1.55057	1.81091	1.4844	1.62097
ENSMUSG00000080316	0.12346	0.59026	0.34644	0.68683	0.68311	0.78566	0.90796	1.05792	0.72107	0.61738	0.90589	1.05377	0.75919	-0.06549	0.07939	0.6008	0.70353	0.7678	0.35101	0.62041	0.06128	0.02561	0.475	0.51015	0.41655	0.47091	0.62096	0.32361
ENSMUSG00000080268	1.93835	1.68592	1.6566	1.55893	1.59458	1.79496	1.42248	1.58276	1.63163	1.64907	1.5383	1.61886	1.5468	1.57752	1.19529	1.3147	1.41184	1.50534	1.48451	1.6721	1.52677	1.46094	1.68764	1.79033	1.42643	1.5007	1.40679	1.43977
ENSMUSG00000080115	0.35717	0.45105	0.52365	0.56891	0.52771	0.31738	0.08269	0.47706	0.77864	-0.19706	0.53279	0.6008	0.45297	-0.01924	0.43956	0.29976	0.77481	0.52283	-0.54111	0.70177	0.62385	0.04472	-0.00456	0.07479	-0.10362	0.75696	0.37444	-0.1396
ENSMUSG00000079941	2.13096	2.24819	2.4263	2.31185	2.3792	2.60886	2.2426	2.29012	2.52062	2.51199	2.3808	2.3263	2.36053	2.24161	2.1207	2.22068	2.32062	2.38469	2.12042	2.40174	2.29507	2.12479	2.207	2.207	2.27164	2.21246	2.18975	2.24058
ENSMUSG00000079834	-0.41103	-0.17647	-0.59299	-0.97204	0.91842	0.96584	1.18061	1.2663	0.61847	1.37274	1.41545	1.34815	1.32026	0.66203	0.81516	1.25598	1.12135	1.37387	0.90744	0.68557	0.70083	0.7723	1.19645	1.16224	0.59487	0.88862	1.00573	1.11078
ENSMUSG00000079677	1.43143	1.13139	1.27255	1.21794	0.7117	1.06523	0.88352	1.11915	1.197	1.52677	1.68326	1.7214	1.64597	1.32675	1.1263	1.31087	1.5269	1.57687	1.75586	1.47464	1.41909	1.45793	1.53101	1.68689	1.59294	1.64581	1.45828	1.537
ENSMUSG00000079659	1.237	0.88746	0.99107	0.70754	0.82069	0.977	0.77405	0.76114	1.19079	1.24381	1.01338	1.04168	0.79059	0.90993	0.56565	0.69681	0.88299	0.67331	0.92776	0.49694	0.64892	0.37697	0.60741	0.74686	0.64434	0.55437	0.68262	0.50493
ENSMUSG00000079658	1.61461	1.71771	1.73045	1.68988	1.57704	1.80399	1.60686	1.74995	1.97923	1.67031	1.74825	1.78393	1.61577	1.68601	1.68272	1.45227	1.5016	1.8632	1.66623	1.756	1.68971	1.62566	1.79318	1.75175	1.84848	1.83788	1.67328	1.72982
ENSMUSG00000079641	2.78503	2.51995	2.83988	2.80305	1.01394	-0.04483	2.23609	2.28096	2.57158	2.68078	2.65475	2.66527	2.43418	2.66319	2.49623	2.34946	2.58077	2.72663	2.44288	2.27598	2.54942	2.72663	2.6254	2.71001	2.93478	2.90527	2.56994	2.70128
ENSMUSG00000079614	1.65974	1.42591	1.43568	1.5007	1.56193	1.46809	1.41909	1.38534	1.67265	1.32753	1.44322	1.34757	1.38036	1.24538	1.29781	1.60043	1.56136	1.27011	1.27079	1.26148	1.33806	0.78885	0.75663	0.63147	0.82014	0.30684	0.70907	0.59078
ENSMUSG00000079610	0.69825	1.24445	1.23977	1.24145	1.23785	1.56485	1.47722	1.57929	2.01847	1.3404	1.08365	1.14194	0.94753	0.1429	0.51231	0.84122	0.95875	1.42675	1.31206	0.50445	0.81555	0.60839	0.86427	0.85363	0.56891	0.93636	0.90775	0.96229
ENSMUSG00000079605	0.9552	0.82993	1.0581	1.05309	1.10892	0.87396	0.28557	-0.04168	0.48582	0.83696	1.04147	1.12099	1.07465	0.79612	1.00135	0.87046	0.83971	1.00905	0.3498	0.84087	0.77513	0.62478	0.87269	0.83839	0.38718	0.45178	0.87229	0.62846
ENSMUSG00000079592	2.08663	2.13454	1.25378	1.19183	0.47836	1.20057	1.74538	1.90069	1.91522	1.42825	1.6489	1.75724	1.57426	1.59948	1.08534	1.77841	1.92396	2.56159	2.64058	2.49623	2.27413	2.49686	2.74238	2.80126	2.39947	2.61193	2.55992	2.78775
ENSMUSG00000079562	2.05069	2.2299	1.94561	1.92653	2.08786	2.14845	1.96918	1.97697	2.11219	2.05003	2.0881	2.1051	2.15508	2.09352	2.00777	2.06114	2.1592	2.08056	2.16135	2.27318	2.25325	2.38201	2.37445	2.27525	2.22308	2.09593	2.30756	2.20152
ENSMUSG00000079557	1.28	1.21082	1.11878	1.10892	1.30371	1.78483	1.83695	1.91234	2.12785	1.565	1.79507	1.90017	1.79078	1.77538	1.77826	2.10155	2.11165	1.97697	2.13969	1.92674	1.99838	1.91536	2.01478	2.1218	1.80565	2.02084	1.96057	1.95087
ENSMUSG00000079555	0.01243	1.03109	1.15674	1.11015	1.38375	1.61914	1.44236	1.46294	1.30743	1.54079	1.06072	0.96033	0.90006	1.22042	1.00529	1.52519	1.46736	1.56279	0.61738	1.0476	0.87075	1.15419	0.96459	0.95205	1.33427	0.91083	0.75663	0.81516
ENSMUSG00000079553	0.86517	1.15799	2.5907	2.47591	1.23738	1.09348	1.6766	1.82211	1.84487	2.20343	0.96459	1.07406	1.29321	2.09326	1.32106	1.8594	1.80938	1.20681	1.1762	1.80065	1.33246	2.29123	1.10291	1.23977	2.5363	1.64647	1.1388	1.43804
ENSMUSG00000079523	1.55425	2.48128	2.57727	2.74238	2.24427	2.83988	2.28388	2.46172	3.13958	1.82812	2.51146	2.51656	2.07601	2.30058	2.36053	2.77004	2.81265	2.85093	2.49886	2.00754	2.5211	2.351	2.48836	2.6284	2.38514	2.77983	2.19657	2.19965
ENSMUSG00000079511	0.70129	0.65954	0.75956	0.92097	0.14095	0.27026	1.37673	0.93904	0.89933	1.04542	1.13961	1.16013	0.87476	0.65778	0.72404	0.64483	0.91447	0.76748	0.45715	0.49378	0.82474	0.6738	0.81976	0.86427	0.57843	1.01824	0.86902	0.9299
ENSMUSG00000079508	1.07277	1.29285	1.27796	1.07062	1.04439	1.16211	1.17276	1.3571	1.30252	1.1661	1.00687	1.02052	1.10122	1.12225	1.02958	1.12506	1.15193	0.91674	1.00475	1.48287	1.07305	1.15395	1.0581	1.05724	1.23852	1.01501	1.00323	0.99787
ENSMUSG00000079487	2.21716	2.21792	2.1456	2.20984	2.28301	2.12891	2.10048	1.98901	2.01364	2.47459	2.52452	2.43826	2.41911	2.25915	2.34121	2.24685	2.22171	2.04864	2.29954	2.2516	2.09283	2.0784	2.10544	2.02847	2.06946	2.05462	2.1708	2.24542
ENSMUSG00000079480	1.38494	1.33563	1.60639	1.61228	1.08633	1.49616	1.44978	1.44994	1.64448	1.4399	1.35441	1.38302	1.30111	1.32221	1.15689	1.20179	1.38548	1.45642	1.40605	1.25358	1.31657	1.45479	1.78672	1.90375	1.69442	1.64123	1.612	1.52677
ENSMUSG00000079478	1.3122	1.59458	1.51714	1.38957	1.56095	1.69375	1.43579	1.61505	1.82029	1.72489	1.47837	1.66223	1.57349	1.59732	1.55829	1.74409	1.80986	1.48247	1.54449	1.81553	1.61931	1.56136	1.57948	1.70164	1.7686	1.75783	1.65562	1.56109
ENSMUSG00000079477	2.34379	2.38351	2.12213	2.14081	2.27804	2.29817	2.22501	2.32898	2.34331	2.5522	2.58077	2.62354	2.56624	2.51522	2.47521	2.26224	2.27959	2.33718	2.48898	2.24427	2.08832	2.20536	2.36403	2.26733	2.27413	2.12573	2.29954	2.39162
ENSMUSG00000079470	1.80383	2.28134	1.99458	1.99439	1.55457	1.49386	1.8143	1.84393	1.68592	2.07706	1.66013	1.58514	1.4902	1.36519	1.40767	1.55247	1.6163	1.44485	1.64111	1.73165	1.1162	1.31847	1.31875	1.34375	1.56385	1.29971	1.36221	1.29829
ENSMUSG00000079469	1.36414	0.90401	1.00277	1.00551	1.57366	1.67934	1.69164	1.56519	1.55334	0.91958	1.2808	1.17965	1.07305	0.86704	0.79708	1.27984	1.31817	0.98725	0.76748	0.86299	0.75386	0.82037	0.93879	0.8217	0.76669	0.75989	0.65036	0.92409
ENSMUSG00000079442	1.74928	1.43159	1.72272	1.44005	1.87343	2.12213	2.04089	2.07654	2.24225	1.37704	1.59569	1.70611	1.67918	1.80079	1.76297	1.77907	1.90126	1.52596	2.09702	1.8632	1.49149	1.86929	1.73568	1.87121	1.71506	2.05389	1.76349	1.74009
ENSMUSG00000079427	1.12959	1.24498	1.27288	1.11846	1.0217	1.05618	1.139	1.15711	1.45135	1.17945	1.27518	1.26185	1.34471	0.61162	0.71358	0.76085	0.94517	1.21171	1.33678	1.05289	0.62152	0.83136	0.65293	0.61793	1.20895	0.98341	0.35395	1.01175
ENSMUSG00000079426	2.23292	2.27827	2.10661	2.16055	2.23209	2.48205	2.28494	2.37361	2.19548	2.23323	2.10005	2.20026	2.20152	2.21178	2.17137	2.36889	2.26944	2.25189	2.08689	2.1554	2.20463	2.23643	2.09523	2.16502	2.17595	2.15452	2.08963	2.03055
ENSMUSG00000079418	1.15656	1.03644	0.95013	0.93879	1.51139	1.48144	0.96692	1.00769	1.58108	1.10191	1.29321	1.26289	1.21969	0.90844	0.96492	1.10571	1.19242	1.14933	1.35505	1.37356	1.4536	1.26357	1.29692	1.2129	1.31018	1.35563	1.11828	1.47339
ENSMUSG00000079343	2.25214	3.07518	2.49623	2.5926	1.60473	1.59699	2.25189	1.16452	1.1555	2.75399	2.42918	2.27493	2.1439	0.94348	1.03777	1.33693	1.7343	2.55399	3.11633	2.70886	2.86994	1.7206	2.42977	2.29735	2.1978	2.38025	2.55673	2.6284
ENSMUSG00000079334	1.48318	1.3147	1.51805	1.55859	0.98238	1.12225	0.635	0.71742	1.44846	1.14547	1.27719	1.38115	1.16824	1.15643	1.14569	1.13594	1.43493	1.58514	1.85638	1.59294	1.67588	1.85699	1.91926	2.04742	1.71923	2.09241	1.95654	2.07221
ENSMUSG00000079317	1.0129	0.83574	0.91083	0.57268	0.8251	1.10669	0.34227	0.21071	0.68719	0.74119	0.81911	0.94079	0.59592	0.00107	0.4357	0.78885	0.85163	1.02565	0.62096	1.00648	1.18847	0.55083	0.89457	0.82474	1.08588	0.88715	0.77109	0.98803
ENSMUSG00000079316	1.3456	1.46355	1.19508	1.22371	1.49331	1.7452	1.32026	1.2026	1.09545	1.82273	1.64597	1.63197	1.20142	1.08269	1.2915	0.97994	1.21064	1.77272	1.65846	1.18202	0.88982	1.1255	1.42902	1.36519	1.3489	1.20098	1.30877	1.58276
ENSMUSG00000079197	1.95293	2.16251	2.05898	1.93758	1.71292	1.79776	2.23643	2.1097	1.84504	1.63991	1.98473	1.92246	2.01806	2.00612	2.06593	1.48338	1.7136	2.13148	2.23251	2.06114	2.33616	2.50284	2.38673	2.37866	2.6254	2.3654	2.39162	2.48574
ENSMUSG00000079184	1.64286	1.6312	1.55859	1.63487	1.7259	1.94861	1.99876	2.00754	1.67047	2.07001	1.56703	1.4256	1.51504	1.7225	1.67643	1.84348	1.89027	1.76349	1.36431	1.58352	1.85438	1.48808	1.62566	1.55399	1.70498	1.54848	1.53018	1.71578
ENSMUSG00000079144	0.88376	0.42433	0.41543	0.35215	0.44781	0.4033	0.34454	0.14857	0.3629	0.31242	0.70711	0.59122	0.39871	-0.1802	-0.219	0.83876	0.80581	0.18206	0.70907	-1.35988	0.2274	0.68398	0.30094	0.26238	0.67301	0.52225	0.57919	0.65293
ENSMUSG00000079111	1.94717	2.03004	2.26799	2.23323	2.10725	2.04496	2.05115	1.99392	2.29735	2.1091	2.33047	2.30756	2.53482	2.12328	2.28096	2.25793	2.30521	2.33925	2.01456	2.22419	2.11769	1.88828	1.76051	1.81296	2.01658	2.13813	1.82197	1.88278
ENSMUSG00000079109	1.18362	1.6262	1.38548	1.572	0.80785	0.55437	1.41753	1.32979	1.35346	1.31533	1.34121	1.29165	1.43493	1.11358	1.2936	1.59387	1.44382	0.96517	1.73359	1.10775	1.27063	1.1175	1.20234	1.09982	1.02784	0.90817	1.1124	0.96163
ENSMUSG00000079108	1.7976	1.70195	1.68307	1.61874	1.90341	1.95067	1.71996	1.83592	1.69745	1.70443	1.67362	1.54763	1.68601	1.75708	1.89221	1.98249	1.88874	2.01899	1.88568	1.77504	2.19965	1.77381	1.92543	1.86826	1.97697	1.96808	1.85664	1.97738
ENSMUSG00000079104	0.76147	1.41102	1.42692	1.20301	1.11417	1.01935	0.58597	0.85828	1.31817	1.39728	1.48897	1.45888	1.68256	1.6984	1.79719	1.44672	1.28296	1.35	1.59668	1.55425	1.12006	1.93614	2.06833	1.97993	2.10234	1.87255	2.02909	1.89507
ENSMUSG00000079084	1.37227	1.18978	0.6158	0.63799	1.5418	1.86499	1.3299	1.41807	1.26093	0.62096	0.03747	0.30094	-0.00905	0.05445	0.35215	1.17086	1.19603	0.49454	0.92719	0.91736	0.63306	0.66427	0.86326	0.87396	1.06021	0.90401	0.90589	1.00323
ENSMUSG00000079083	1.15459	0.91761	0.61488	0.78488	1.14822	1.09312	1.3147	1.1065	0.83317	0.91613	1.10412	1.07366	1.14194	0.90078	1.06177	1.22811	1.07882	1.08534	1.00861	0.7445	0.88837	0.94459	1.12026	1.09413	1.02924	0.87964	1.11282	0.95107
ENSMUSG00000079057	1.18919	1.73935	2.03321	1.78365	1.80298	1.54223	1.3533	1.0588	1.26307	0.95297	2.14081	1.99209	1.90034	1.36109	1.5076	1.49947	1.48092	1.78964	1.67328	1.05767	1.7948	0.95798	1.34781	1.21674	0.82853	1.42825	0.98498	1.32426
ENSMUSG00000079043	0.86299	1.12917	1.14304	1.30217	1.24362	1.19979	1.37887	1.29673	0.69174	1.09101	1.11862	0.95179	1.23946	1.01913	1.26378	1.41954	1.27908	0.77955	0.82626	1.09942	1.02378	0.81484	1.05767	0.94836	0.91399	0.55025	0.93708	0.80034
ENSMUSG00000079037	1.86072	1.07062	1.41738	1.45533	1.62884	1.68747	1.6312	1.85205	1.0223	1.44222	1.47363	1.42377	1.52607	1.80477	1.96808	2.06135	1.71785	2.1394	1.93136	2.10399	2.16076	1.87227	2.14162	2.0173	2.19692	1.90964	1.86423	2.36941
ENSMUSG00000079036	0.93324	0.81848	0.66685	0.71514	1.05268	0.90337	1.1151	1.04686	1.20995	1.15459	1.00883	0.963	1.08434	0.96918	1.01061	1.06717	1.01251	1.10629	1.09101	1.22614	1.30979	0.86732	0.82656	0.86232	0.9601	1.17598	0.97306	0.82267
ENSMUSG00000079020	1.03524	1.22026	1.23397	1.37387	1.56989	1.45842	1.27106	1.69422	1.40482	1.32675	1.45761	1.5522	1.60404	1.16708	1.32426	1.17345	1.13942	1.50723	1.20098	1.39007	1.40257	1.47853	1.0865	1.20039	1.16452	1.34915	1.09982	1.06428
ENSMUSG00000079003	1.64747	1.60419	1.81055	1.80337	1.6976	1.77381	1.55581	1.55334	1.59603	1.63446	1.72048	1.77049	1.53152	1.60852	1.36383	1.31787	1.68814	1.31787	1.78943	1.76661	1.43067	1.54636	1.42722	1.63797	1.68043	1.59716	1.5022	1.47853
ENSMUSG00000078974	1.7084	1.90285	1.90604	1.98229	2.07264	2.32411	2.14081	2.27318	2.48648	1.86396	2.01497	2.08904	1.84925	1.77065	1.81575	1.60571	1.70529	2.22171	1.90092	2.01188	1.97383	2.03203	2.03724	2.04312	2.15508	2.18778	1.92464	2.07733
ENSMUSG00000078970	1.14677	1.10936	1.03384	1.07557	0.64947	0.86869	0.88025	0.87601	0.96055	1.02131	0.80411	0.78566	0.58467	0.91761	0.75241	0.44602	0.53977	0.91694	1.18466	0.79708	0.93904	0.61052	0.95734	0.98258	0.71464	0.60337	0.83225	0.8843
ENSMUSG00000078941	1.77401	1.52842	1.79917	1.75863	1.86637	1.89712	1.72849	1.90143	2.114	1.93475	1.60606	1.60492	1.68971	1.70349	1.70316	1.53994	1.67813	2.12296	2.41911	2.16135	2.07417	2.0463	2.05069	1.9788	2.14427	2.11033	1.97965	2.08904
ENSMUSG00000078931	0.76042	0.46614	0.8302	0.7678	0.81166	0.94203	0.96163	1.07911	1.01604	0.80002	0.47235	0.48064	-0.00222	-0.3019	-0.27314	-0.00905	0.5709	0.74686	0.35907	0.67628	0.35101	0.64305	0.50609	0.68683	0.86486	1.10191	0.52835	0.47645
ENSMUSG00000078923	1.74232	1.57627	1.52172	1.66648	1.82482	1.83525	1.73445	1.7934	1.7828	1.84925	1.65935	1.75094	1.75898	1.72445	1.72272	1.86826	1.7473	1.99876	1.82669	1.97786	1.9346	1.90964	1.86929	1.77812	1.94603	1.80551	1.79632	1.80747
ENSMUSG00000078908	1.37049	1.21433	1.21331	1.18303	1.03927	0.85661	1.21272	1.26838	1.28707	1.1144	1.23835	1.42001	1.37858	1.08633	1.07103	0.90078	0.90551	1.24393	0.84056	1.03178	1.12336	1.02447	1.06273	1.2039	1.09101	1.18452	1.21969	1.09621
ENSMUSG00000078813	1.28785	1.19907	1.04351	1.29133	1.59327	1.73893	1.38136	1.44602	1.23581	1.42429	1.20001	1.28333	1.11282	1.19825	1.01956	1.12645	1.37803	1.42902	1.45761	1.40212	1.36999	1.35176	1.54236	1.57331	1.43977	1.46379	1.48216	1.57262
ENSMUSG00000078812	2.42583	2.56068	2.87897	2.78241	2.58573	2.68078	2.50743	2.59783	2.82075	2.73597	2.44237	2.50091	2.59429	2.75963	2.62167	2.77831	2.74676	2.77391	2.73044	2.8289	2.73597	2.88392	2.54531	2.6386	2.88132	2.73296	2.5236	2.58885
ENSMUSG00000078794	1.57874	0.65562	1.0564	0.92595	1.55334	1.49715	1.7194	2.12543	1.88461	0.79638	0.62385	0.8302	0.51015	1.11458	0.30094	0.91736	1.14213	1.62272	1.413	1.86547	1.87706	1.42118	1.30704	1.61283	1.47281	1.54162	1.40116	1.51401
ENSMUSG00000078789	1.55593	1.17497	1.39454	1.33618	1.46896	1.55959	1.50624	1.47281	1.50357	1.48037	1.84276	1.91702	1.83753	1.87063	1.79874	1.45916	1.56618	1.60899	1.26428	1.30898	1.1944	1.20234	1.10629	1.21767	1.20995	1.34121	1.24428	1.2795
ENSMUSG00000078786	1.01394	0.45847	0.76228	0.73408	1.04592	0.95072	0.77596	0.67628	0.54255	0.1429	1.10973	1.13483	0.99732	1.14072	1.11966	1.31298	1.49568	0.76569	0.96845	1.22634	1.13397	0.26647	0.98138	1.10629	0.52012	0.72369	0.80749	0.43181
ENSMUSG00000078784	1.66514	1.18561	1.9301	1.81538	1.53408	1.88442	1.38173	1.45049	2.1592	1.9025	1.7958	1.82017	1.72233	1.78378	1.76152	1.00687	1.25467	1.8747	1.65548	1.79078	1.48451	1.61475	1.53373	1.59327	1.8916	1.79013	1.19162	1.76121
ENSMUSG00000078773	0.30185	0.36983	0.52107	0.33172	0.67876	0.61793	0.72334	0.59592	0.54786	0.5684	0.33386	-0.03166	0.58989	0.48064	0.27026	0.75064	0.56762	0.27922	0.14095	0.43023	0.63942	0.45896	0.13431	-0.02755	1.17763	0.9844	0.10605	0.1636
ENSMUSG00000078762	1.30358	1.66529	1.67157	1.62387	0.8667	0.85935	0.57328	0.46471	1.1936	2.09326	1.61359	1.64143	1.78567	2.0244	1.60863	1.20916	1.42793	1.12959	0.75839	1.65502	1.10083	1.84105	1.63163	1.71854	1.9366	1.56531	1.65437	1.4194
ENSMUSG00000078719	0.29782	0.02561	0.05532	0.16819	0.31519	0.66339	0.94459	0.99763	0.65778	0.35506	0.86869	0.77337	0.50175	0.39175	0.45847	-0.37415	-1.87389	0.50175	1.12793	0.57017	0.63449	0.11995	0.45439	0.64847	0.89366	0.61527	0.79468	1.41102
ENSMUSG00000078716	2.3376	1.43702	1.23501	1.18662	1.06846	1.10412	1.62415	1.38942	1.08365	1.10973	1.55566	1.62136	1.53771	1.4124	1.41518	1.00529	1.08474	1.11689	1.58311	0.83839	1.1923	1.33157	1.81209	1.91761	1.58095	1.72329	1.80637	1.5456
ENSMUSG00000078713	0.6227	0.50876	0.54255	0.5462	0.05298	0.36183	0.3629	0.55554	0.99763	0.03171	1.01466	1.08128	0.40844	0.55493	0.37444	0.29669	0.22568	0.90156	0.31406	0.69487	0.37346	0.20309	0.46321	0.52107	0.333	1.01026	0.24541	0.35215
ENSMUSG00000078695	1.61994	1.10339	1.39103	1.1659	0.33474	0.378	0.58236	0.68471	1.57527	1.94471	1.72289	1.77732	1.66483	1.55072	1.64701	1.61505	1.71202	1.37692	2.07869	1.95259	1.57311	1.56545	1.27323	1.52985	1.62402	1.53843	1.45743	1.31316
ENSMUSG00000078681	1.71327	1.38896	1.37921	1.50509	1.34643	1.37079	1.40953	1.49034	1.60657	1.34015	1.27758	1.3293	1.12937	1.43654	1.40148	1.13021	1.32072	1.31961	1.40339	1.48451	1.40642	1.38115	1.62725	1.64857	1.52345	1.52998	1.6163	1.57085
ENSMUSG00000078676	1.97329	2.04693	1.98958	1.942	1.99527	2.03266	2.21435	2.1261	2.3048	1.8499	1.96693	1.98901	2.02317	1.9907	1.95519	1.96977	1.90467	1.80278	1.81196	1.90923	1.8594	1.90624	2.01386	1.94362	1.80383	1.75402	2.04185	1.7348
ENSMUSG00000078671	2.01278	1.9809	1.71506	1.80052	1.82273	1.78353	1.86002	1.68616	1.60988	1.62687	1.36814	1.28587	1.41925	1.54538	1.7171	1.89921	1.64123	1.51543	1.62149	1.4819	1.63816	1.47649	1.69956	1.51849	1.49457	1.5409	1.80794	1.64597
ENSMUSG00000078656	1.4089	1.16224	1.16268	1.25552	1.09161	1.42776	1.54062	1.55581	1.75013	0.93284	1.41562	1.51714	1.34951	0.93756	1.24033	0.88784	1.14919	1.64987	1.33908	1.30526	1.28449	1.29133	1.43268	1.5156	1.32241	1.54619	1.29178	1.42377
ENSMUSG00000078652	1.82945	1.53503	1.58726	1.5738	2.30239	2.30611	1.95893	2.17927	2.28388	1.66648	1.74874	1.7526	1.99575	1.87912	1.91904	1.72736	1.59699	1.89559	1.84977	1.88292	1.86656	1.9666	1.83123	1.82844	1.95725	1.82405	1.86929	1.76908
ENSMUSG00000078622	2.05029	1.74589	1.72048	1.68601	1.72521	1.67781	1.98862	2.11193	1.93337	1.71578	1.88095	1.73553	1.80492	1.76152	1.8309	1.88255	1.75966	2.00944	1.83608	1.71902	1.67142	1.6489	1.72489	1.57311	1.73497	1.67813	1.69231	1.60801
ENSMUSG00000078619	2.20094	2.01551	2.06704	2.02344	1.83331	1.76587	1.86676	1.74874	2.14684	1.85859	1.94342	2.02276	2.02405	2.12956	1.99575	1.8343	2.00944	1.92524	1.9499	2.21755	2.04742	2.00482	1.94471	1.9772	1.92737	1.86948	2.00323	1.86002
ENSMUSG00000078584	0.67301	0.8611	0.78685	0.84762	1.2039	1.25358	1.26645	1.34254	1.32841	1.37016	1.03109	1.052	0.9149	1.28981	1.37049	0.54573	0.54392	1.4425	1.01175	1.39279	1.22765	1.19018	1.25317	1.33968	1.15936	1.34409	1.21655	1.34072
ENSMUSG00000078572	0.85828	0.61219	0.69074	0.36433	0.82037	1.17637	0.52012	0.83839	1.47665	1.1342	1.10239	1.15035	0.88691	0.95107	0.80492	0.87563	0.87834	1.25339	0.77439	0.80581	1.12026	0.93051	1.12485	1.20057	1.16188	1.29896	1.05528	1.24874
ENSMUSG00000078566	2.31495	2.351	2.27493	2.58651	2.0103	2.12042	2.34121	2.21675	1.54662	2.47866	2.86171	2.81265	2.44786	1.72471	2.21358	1.97348	2.16168	1.57366	1.41895	1.4194	1.24894	1.41184	1.3086	1.32072	1.60743	1.61448	1.97302	1.58048
ENSMUSG00000078532	0.59078	-0.88769	1.09545	0.95649	1.38507	1.50738	-1.28189	0.03747	0.7179	1.07487	0.20795	0.26369	0.40434	1.02254	0.80266	0.75101	0.65998	0.99862	1.07961	1.34254	1.43095	0.93165	0.74372	0.94815	0.92564	0.47749	0.51294	0.57843
ENSMUSG00000078517	2.25189	2.23948	2.21635	2.18384	2.03724	1.71812	2.05262	2.21604	1.82595	1.95128	1.88719	1.91522	1.98229	2.18022	2.33718	2.16833	2.21049	1.85406	1.98667	2.20597	2.19342	2.34331	2.01948	2.03112	2.19158	2.22501	2.17045	1.90643
ENSMUSG00000078515	0.81133	1.48247	1.10799	1.30757	1.37127	1.38322	1.42329	1.13059	0.80869	1.23416	0.8302	0.82911	1.04439	0.64735	0.9383	1.11546	0.92531	1.24743	1.94071	1.95754	1.77653	1.69356	1.70349	1.58949	1.57607	1.61914	1.72389	1.61647
ENSMUSG00000078484	1.46885	1.41877	1.45038	1.584	0.90192	0.93459	1.24428	1.20409	1.22653	1.40482	1.79175	1.80842	1.62215	1.64161	1.58602	1.32809	1.53994	1.49034	1.3695	1.25725	1.44337	1.04741	1.22977	1.33409	1.13095	1.30358	1.25448	1.26397
ENSMUSG00000078453	1.08559	1.09942	1.32544	1.18958	1.44968	1.5879	1.1659	1.43348	1.24975	1.1212	1.23191	1.39796	0.91896	1.33678	1.41114	1.14486	0.96918	1.39103	1.28063	1.55746	1.55535	1.17144	1.0476	1.07277	1.26956	1.41393	1.04873	1.33246
ENSMUSG00000078441	1.74589	1.72181	1.76263	1.75654	1.67469	1.85263	1.48746	1.48053	1.87858	1.8916	1.72849	1.85384	1.83492	1.93071	1.8939	1.3419	1.40381	1.48175	1.63522	1.91234	1.81225	1.88292	2.00592	2.14059	1.88828	2.01551	1.97616	1.75537
ENSMUSG00000078440	1.8632	1.82482	1.75521	1.62203	1.79525	1.97074	1.60829	1.7564	2.19615	1.68782	1.69956	1.82425	1.73098	1.81553	1.43623	1.25535	1.4194	2.03819	1.75413	1.90547	1.80106	1.78535	1.71457	2.06649	1.98308	1.95993	1.69115	1.69523
ENSMUSG00000078429	2.28134	2.05406	2.1424	2.1326	2.03652	1.699	1.82609	1.4878	1.97527	1.90143	2.20378	2.27164	2.18999	2.14459	2.02483	1.65489	1.63487	2.16193	1.83104	2.04034	2.05979	2.23209	2.0158	2.08242	1.86132	2.17382	2.11741	1.99901
ENSMUSG00000078427	1.7166	1.92207	2.05869	1.92377	1.64462	1.84276	1.86208	1.84504	1.92225	1.75999	1.76475	1.756	1.76036	1.86342	1.93758	2.00612	2.07221	1.81296	1.7468	1.64581	1.64025	1.53086	1.86002	1.77633	1.78943	1.72897	1.55193	1.72849
ENSMUSG00000078348	1.36145	1.26913	1.63935	1.64448	1.36322	1.70778	1.57444	1.67191	1.76426	1.31393	1.26289	1.39681	1.29927	1.48228	1.19769	1.23323	1.27422	1.67191	1.59553	1.41363	1.69777	1.64335	1.54928	1.78503	1.70778	1.99018	1.49568	1.63056
ENSMUSG00000078317	1.27477	1.01536	0.50731	0.57328	1.09182	0.9832	1.25612	1.24248	1.45244	1.29568	1.32072	1.40324	1.16708	1.19563	1.13634	1.41169	1.584	1.09504	1.23397	2.03081	1.84757	1.14779	1.66013	1.80117	1.32809	1.57426	1.92377	1.40104
ENSMUSG00000078249	1.18603	1.7686	2.34277	1.90846	2.36268	2.5057	1.25944	1.05978	1.97461	1.8632	1.9102	2.06262	1.78894	2.06221	1.40257	1.16939	1.16919	1.70403	2.10155	2.18345	1.36984	1.85523	1.53815	1.76152	2.2498	1.25874	1.57752	1.62402
ENSMUSG00000078201	1.26493	0.90006	1.39694	1.34121	0.95341	1.07928	1.09047	1.25748	1.14763	1.0098	1.28159	1.31831	1.23047	1.10291	1.06235	1.052	0.96692	1.28195	0.83472	1.27775	0.75193	0.79612	1.05031	1.0395	0.53665	0.99478	1.07142	0.95297
ENSMUSG00000078184	1.75031	1.77633	1.97504	1.85568	1.7569	1.85406	1.88629	1.87172	1.92412	2.05493	1.94675	1.88941	1.91419	2.03994	1.94514	1.81518	1.85844	1.83803	1.58863	1.94603	1.71232	1.71041	1.9615	1.90717	1.96877	1.76459	1.78353	1.72944
ENSMUSG00000078157	2.03181	1.50691	1.68356	1.69793	2.17137	2.13214	1.63148	1.58544	2.22379	1.61448	1.81196	1.93247	1.88874	2.01235	1.74249	1.39667	1.4256	1.39817	1.71785	1.96512	1.8	1.76135	1.78585	1.95937	1.79288	2.04864	1.90264	1.71902
ENSMUSG00000078154	1.51295	1.57231	2.04312	1.95754	1.98667	2.06759	1.62713	1.82926	2.26839	1.93136	1.86986	1.8499	1.89687	1.80722	1.84276	1.62687	1.73031	1.68702	1.74747	1.70132	1.81942	1.80117	1.79175	1.84519	1.85384	2.00444	1.70671	1.62725
ENSMUSG00000078139	1.32163	1.36058	1.07044	1.06045	1.86826	2.16168	1.98819	2.07108	1.34202	1.81688	1.61159	1.50624	1.5007	1.47552	1.64223	1.63267	1.71073	1.46201	1.54107	1.59031	1.21913	1.2129	1.35346	1.33879	1.32106	1.50357	1.38349	1.40509
ENSMUSG00000078128	2.80126	2.73821	2.92151	2.79629	2.91316	3.07217	2.6762	2.72367	2.8982	3.14706	2.8289	2.80305	2.79777	2.78355	2.68078	2.66883	2.8982	2.89175	2.83508	2.92807	3.03404	2.959	2.97251	2.94848	3.11633	3.03893	2.9032	3.09001
ENSMUSG00000077450	1.9378	1.92947	1.39503	1.61461	2.02459	2.2355	2.04547	2.06221	2.1554	2.00302	2.15997	2.23802	2.01785	1.93225	2.00462	2.03112	2.11972	2.02909	2.18713	2.08188	1.89712	2.14999	2.20094	2.21276	2.0244	2.09546	2.17697	2.09047
ENSMUSG00000076441	1.02521	1.25835	2.14845	2.25601	1.16434	1.2145	0.22053	0.8279	0.70443	0.54303	0.63836	0.54955	0.9223	1.09839	1.3143	1.27518	1.50944	-0.76648	1.87608	1.01501	-0.19114	0.59829	0.80439	0.83801	1.83072	0.39015	0.1104	0.56181
ENSMUSG00000076435	1.2754	0.93933	1.81124	1.76806	1.68634	1.42643	2.4474	2.11572	1.67995	1.66496	1.82017	1.81672	1.77755	2.18999	2.21977	2.67933	2.80969	1.91133	2.32722	1.6478	1.8747	1.17008	0.98633	1.15504	0.90589	1.18828	1.21256	0.51294
ENSMUSG00000076432	2.10262	2.27049	2.40765	2.39162	2.29311	2.38728	2.05069	2.16251	1.95754	1.92396	2.07488	1.98713	2.17428	2.07733	2.11086	2.21537	2.14366	2.05003	2.30089	2.37059	2.31592	2.53405	2.43943	2.35729	2.48205	2.42583	2.35387	2.24617
ENSMUSG00000075593	2.39372	1.45084	0.88352	1.0819	1.19099	1.33246	-0.85647	-0.88769	1.13118	0.71055	1.55608	1.56193	1.25748	1.50545	1.52519	1.51017	1.37468	0.67751	1.4453	0.84056	-0.10829	0.82822	0.47836	0.50806	0.97938	0.64483	0.59078	0.93779
ENSMUSG00000075592	0.90485	0.54892	0.89962	0.7117	2.02371	1.69002	1.47464	1.48593	1.51377	0.65293	1.25854	1.45978	1.06565	1.28449	1.52201	1.01604	1.21638	1.92151	0.60995	1.3955	0.57268	1.97187	2.47093	2.5522	1.90659	2.10566	2.68078	2.09619
ENSMUSG00000075590	1.03109	1.64808	1.4336	1.74995	0.8169	0.80581	1.39612	1.16319	1.29884	2.17532	2.10155	2.09546	1.91133	1.76349	1.80917	1.70684	1.66565	1.637	2.01634	1.22223	1.19825	0.76228	1.15936	1.20362	0.97338	1.7174	1.28542	1.42429
ENSMUSG00000075528	1.85321	1.52596	1.94493	1.75413	2.29537	2.40534	2.03237	2.18778	1.89817	1.8677	1.8739	1.863	1.87227	1.86031	1.87893	1.9655	2.05542	1.84962	1.8747	1.97808	1.58833	1.84126	1.81055	1.8878	1.77954	1.91419	1.70316	1.74556
ENSMUSG00000075486	1.14394	1.14464	0.85828	0.83839	1.06483	1.386	0.84269	1.18646	1.2754	1.86423	1.22854	1.31533	1.05109	1.30313	1.32072	0.8591	1.0476	1.05742	1.04569	1.32407	1.11708	0.99358	1.11573	1.14213	1.14033	1.03088	1.02146	1.05377
ENSMUSG00000075470	1.00061	1.0636	1.09839	1.18862	0.18341	0.25716	0.51231	0.57763	0.81312	0.35101	-0.39975	-0.50236	0.333	0.44428	0.00989	0.75989	0.72293	0.99209	0.85235	0.40746	0.75732	0.68611	0.6008	0.60891	0.42288	0.39266	0.68901	0.58519
ENSMUSG00000075467	1.82289	1.15504	1.29793	1.1151	1.1914	1.325	1.09918	1.24428	1.45497	1.38977	1.62777	1.7348	1.55347	1.57262	1.4146	0.90192	1.09413	1.92888	0.09853	2.0651	1.3147	1.3301	1.38977	1.50187	1.41725	1.63237	1.43702	1.49846
ENSMUSG00000075419	2.25358	1.79154	1.81746	1.74959	1.49748	1.48837	1.65261	1.78126	1.93136	1.80762	1.88171	1.98147	1.97014	1.86164	1.84882	1.82017	1.7718	1.81625	1.48734	1.7259	1.66206	1.77489	1.61994	1.73516	1.73085	1.72219	1.73376	1.73651
ENSMUSG00000075415	2.01341	1.85859	1.92973	1.85307	1.71645	1.81246	1.78036	1.69033	1.32577	1.70698	2.49558	2.50329	2.25434	1.57399	1.26397	2.01995	1.83313	1.7452	1.48037	1.54196	2.07108	1.88629	2.14534	2.04034	1.7905	1.44783	1.66456	1.93577
ENSMUSG00000075394	0.47166	0.85661	0.73454	0.91842	1.05597	1.26428	1.43857	1.53304	1.16547	0.9601	1.036	1.04189	0.39266	0.51956	0.7527	0.70353	0.90078	1.21331	0.77042	1.12049	1.13021	0.35804	0.96608	1.11331	0.75386	0.68815	0.7117	1.03384
ENSMUSG00000075376	1.40797	1.5526	1.15626	1.388	1.3956	1.32716	1.41725	1.26739	1.12006	1.28315	1.09819	1.0026	1.49264	1.37033	1.57704	1.46406	1.09284	1.19324	1.2964	1.03809	1.42098	1.49816	1.37803	0.96787	0.9366	1.18798	1.52966	1.06631
ENSMUSG00000075327	0.90651	1.28097	1.20199	1.17407	1.2569	1.18018	0.95734	1.09799	1.24329	1.12026	0.96975	1.0588	0.95041	0.7707	0.72658	0.93228	0.89219	0.77337	1.1277	0.95072	1.10594	1.13656	1.05597	1.03088	1.05352	1.11915	1.11221	1.1055
ENSMUSG00000075284	1.74699	1.40104	1.48004	1.36871	1.31724	1.1027	1.18737	1.06913	1.15435	1.30004	1.58661	1.49443	1.4851	1.42248	1.43568	1.94185	1.73219	1.21551	1.67469	1.88515	1.51726	1.62884	1.58383	1.49503	1.43894	1.2735	1.89269	1.67249
ENSMUSG00000075266	0.15302	0.62041	1.26378	1.07507	0.40148	0.98676	0.58638	0.86767	1.17816	0.42782	0.65091	0.76714	0.7117	1.34726	0.13604	0.9736	1.16031	0.4191	-0.32512	0.36983	0.31406	0.64947	0.15302	0.21343	0.8733	0.53529	0.09393	0.06275
ENSMUSG00000075254	0.71403	0.94635	0.94517	1.11774	1.39202	1.03667	1.70024	1.64808	1.2178	1.0412	1.5081	1.3645	1.59387	1.13021	1.22595	1.72506	1.14413	1.88193	1.51655	1.51745	1.41114	1.85478	1.24346	1.25026	1.43939	1.30282	1.51504	1.79905
ENSMUSG00000075232	1.63512	1.50309	1.60743	1.52904	1.68988	1.52283	1.4536	1.33938	1.48929	1.40999	0.82433	0.778	1.18722	1.59631	1.6976	1.46798	1.23433	1.34505	2.0792	1.54795	1.46111	1.5022	1.79465	1.73388	1.7136	1.54373	1.68497	1.56069
ENSMUSG00000075229	0.9149	1.15308	1.30407	1.29046	1.1944	1.39422	1.32979	1.50201	1.51883	1.52283	1.44978	1.54604	1.28502	1.01555	1.00573	0.81484	1.03484	1.2915	0.99892	1.33891	1.33968	1.27303	1.38716	1.43127	1.51981	1.37061	1.36871	1.18036
ENSMUSG00000075227	1.55551	1.63176	1.76349	1.68242	1.24851	1.49346	1.29984	1.41407	1.55759	0.85661	1.30282	1.36484	1.32777	1.27045	1.1778	1.31831	1.47084	1.58575	1.36194	1.9788	1.46885	1.39184	1.57817	1.81486	1.49519	1.53217	1.59476	1.26341
ENSMUSG00000075054	1.16824	1.18415	0.92383	1.18242	1.03384	1.19563	1.34523	1.39768	0.8843	1.16122	0.70083	0.69581	0.63044	0.68983	0.71657	1.10191	0.82911	1.01202	0.75663	1.16842	0.80698	0.59487	0.69532	0.79678	0.69367	0.74156	0.81203	0.48582
ENSMUSG00000075040	0.21812	1.56121	1.47552	1.53137	0.49318	0.59829	1.44639	1.44236	0.92747	1.38749	1.65532	1.71202	1.34726	1.42299	1.46496	1.45325	1.62872	1.35176	1.15917	0.85295	1.48692	1.33771	1.60878	1.7498	1.39295	1.42928	1.6997	1.6035
ENSMUSG00000075033	1.10447	0.55603	0.59165	0.25298	0.90156	0.90817	1.34094	1.28901	1.28718	1.02784	0.68944	0.55437	0.64639	0.81389	0.99917	1.23738	1.18202	1.07837	0.49055	0.94479	0.8789	0.39509	0.43023	0.1636	0.52771	0.20795	0.13938	-0.38153
ENSMUSG00000075028	0.47571	-0.03776	0.31866	0.45224	0.23614	0.69019	0.1104	0.20929	0.29782	1.022	1.31763	1.51698	1.39503	1.32544	0.89185	0.47836	0.42288	-0.28261	0.00419	0.3934	0.40926	0.14857	0.26369	0.50445	-0.05883	0.27455	0.38601	0.02893
ENSMUSG00000075012	0.90337	1.03777	1.29065	1.33879	1.52949	1.3899	1.07911	1.26185	0.98899	0.85634	1.57349	1.63359	1.91726	1.90516	1.94675	1.62566	1.90867	1.1065	1.85568	1.25975	1.04592	0.05445	0.59078	0.72334	0.46408	1.28418	-0.00905	0.69911
ENSMUSG00000075000	1.29034	1.23515	1.26723	1.139	1.36689	1.53605	2.04209	1.96057	1.26234	1.36034	1.48544	1.41641	1.36235	1.32264	1.46336	1.66013	1.64769	1.37758	1.17497	1.43882	1.39406	1.3122	1.28097	1.30326	1.28981	1.28998	1.3122	1.36235
ENSMUSG00000074994	1.33603	1.69632	1.31624	1.44189	1.20518	1.08242	1.38398	1.12099	1.32979	1.15569	0.86616	0.80907	0.92531	1.10412	0.89793	0.78639	0.62385	0.8533	1.02378	1.24445	1.44055	1.5702	1.47312	1.29433	1.42118	1.31055	1.55794	1.16749
ENSMUSG00000074971	2.16531	0.6008	-0.477	-0.355	1.02028	0.89121	0.86582	0.39582	0.36789	1.17919	0.91613	0.88171	0.77955	0.12685	0.01706	0.69757	1.25489	0.48777	1.60829	0.63697	0.67984	-0.42429	1.30877	1.34394	0.67015	-0.20404	1.13095	0.55802
ENSMUSG00000074934	1.1762	2.85683	0.77864	1.47665	2.21215	1.94168	2.0173	1.18662	-0.08762	1.73011	0.69651	0.72181	-0.13028	-0.48696	0.10605	1.03384	0.73454	2.1848	1.0922	1.97862	1.76213	0.99133	0.05893	-0.26176	1.1061	0.25941	0.2735	0.97607
ENSMUSG00000074925	0.45582	0.76828	0.47046	0.82883	0.778	0.76228	0.86205	0.98879	0.53426	0.60839	0.66975	0.49318	0.88837	0.49569	0.47706	0.87655	0.86732	0.8302	0.32882	0.65954	0.75459	0.65242	0.47387	0.25843	0.00989	0.54342	0.64892	0.19307
ENSMUSG00000074922	1.07164	0.90156	1.02521	1.00352	0.90969	0.66427	1.06134	0.90271	1.05326	0.99017	1.16547	1.12077	1.21363	1.09142	0.84762	0.67586	0.8618	1.31276	1.16859	1.29673	1.05309	1.08999	1.12737	1.15587	1.14586	1.13616	1.18002	1.14304
ENSMUSG00000074916	2.16278	1.45401	1.84276	1.83168	1.90054	1.87666	2.05561	2.02317	1.80876	1.84213	2.26418	2.30963	2.08636	2.04796	2.09495	1.32194	1.57861	1.61359	1.46669	1.71166	1.55924	1.60304	1.32514	1.5471	1.40289	1.68545	1.45374	1.7075
ENSMUSG00000074909	1.10571	0.92956	1.31602	1.2912	1.37033	1.31533	1.46946	1.46964	1.31087	1.05326	1.15755	1.03329	1.18379	1.01202	1.30916	1.53353	1.37448	1.11846	1.3299	1.09125	1.22026	1.01773	1.24691	1.15902	1.03706	0.83574	1.23556	1.01631
ENSMUSG00000074890	0.86704	1.26307	0.79384	1.1039	1.09839	1.10867	1.27205	1.41769	0.89293	0.72748	0.90028	0.92889	1.10147	1.08614	1.04459	0.85295	0.88476	1.27438	1.11208	1.1398	1.03725	1.27924	1.28565	1.2936	1.17476	1.15936	1.35422	1.13191
ENSMUSG00000074886	1.69933	1.57638	1.83914	1.81184	1.89712	1.76263	1.10174	1.11126	1.48004	1.59294	1.63163	1.68601	1.76065	1.77706	1.55316	1.80458	1.70645	1.74658	1.75863	1.88957	1.699	2.0944	1.77717	1.79905	1.92324	1.78503	1.74026	1.78264
ENSMUSG00000074884	2.50329	1.93048	2.43224	2.50909	2.27631	2.64689	2.67749	2.66228	2.79629	2.98502	3.13198	3.15783	3.04163	2.74676	2.82203	2.5438	2.76435	2.90706	2.85923	2.88132	2.85434	2.25834	2.24122	2.38201	2.14534	2.32587	2.20343	2.33798
ENSMUSG00000074825	0.98827	0.97607	1.25406	1.38019	0.89877	0.99604	1.12882	1.16883	1.20216	0.86552	0.95394	1.14413	1.21064	1.41641	1.27438	0.80492	0.6354	0.6354	0.79708	0.7117	1.35968	1.06428	0.89853	1.01061	1.01913	0.89401	0.78757	0.36106
ENSMUSG00000074811	1.35275	1.50999	1.39184	1.41713	1.79275	1.98572	1.76297	1.89887	1.48646	1.59858	1.69632	1.78672	1.77826	1.70268	1.67676	1.1584	1.25219	1.61746	1.6918	1.55893	1.75851	1.54208	1.69199	1.93991	1.4936	1.65489	1.7206	1.4819
ENSMUSG00000074797	1.59519	1.6959	1.84004	1.7905	1.39644	1.46184	1.81886	1.87156	1.32895	1.57929	1.43962	1.46534	1.4404	1.38239	1.15355	1.29673	1.45779	1.08976	1.3993	1.36368	1.36092	1.37095	1.48318	1.54337	1.41675	1.56109	1.62536	1.56228
ENSMUSG00000074796	-0.59299	-0.48696	0.01706	0.05445	0.68158	0.42515	1.17798	1.06378	0.36601	0.85858	0.08514	0.29341	0.73754	1.59125	1.71996	0.78377	0.84087	-0.09152	0.82721	0.25136	0.33743	0.58698	-0.8376	-0.25013	0.4357	0.06128	-0.16601	-0.73844
ENSMUSG00000074794	1.62687	1.57562	0.84534	0.87046	2.06426	1.88553	2.23176	1.9197	1.78776	1.18002	0.18864	0.34454	0.2899	0.59695	1.19079	0.90368	0.87424	0.90244	1.33618	0.83801	1.61779	0.59877	1.07998	1.00687	0.75956	0.74096	1.07733	1.13865
ENSMUSG00000074785	0.95497	-0.09152	0.11292	0.49694	0.88926	0.40495	0.99763	0.48777	0.03573	0.8327	1.86087	1.76446	1.67958	1.09918	1.01044	1.77556	1.25104	-0.44503	-0.22972	0.4425	-0.3644	0.27174	0.84879	0.63697	0.49131	0.18864	0.22342	-0.26176
ENSMUSG00000074781	1.62005	1.57033	1.59065	1.64462	1.81709	2.02317	1.46496	1.51212	1.71996	1.56734	1.52917	1.53264	1.59781	1.55399	1.67377	1.57462	1.56149	1.61813	1.70778	1.61761	1.58095	1.50099	1.57651	1.46294	1.78894	1.60508	1.49715	1.584
ENSMUSG00000074749	0.90006	0.83638	0.90681	0.82232	0.8498	0.92409	1.0355	0.68683	0.75956	1.22765	1.13042	1.13512	1.0996	1.21272	1.17204	1.06997	1.23397	1.19923	1.19584	1.2722	1.65003	1.49331	1.57244	1.50846	1.49234	1.4632	1.36999	1.6684
ENSMUSG00000074746	1.15419	1.57817	1.32528	1.50708	1.34598	1.0849	1.33879	1.1263	1.28565	1.25929	1.40064	1.28	1.51683	1.52966	1.72909	1.45244	1.20971	1.30096	1.4506	1.04273	1.55489	1.42248	1.51543	1.24553	1.30019	1.26875	1.413	1.12811
ENSMUSG00000074743	1.93599	1.50237	1.28998	1.95676	1.23125	0.72404	-1.20595	0.27174	1.75402	1.4395	0.57658	0.46028	0.35215	1.32691	1.35206	0.88025	1.16167	1.49115	1.06717	1.20881	0.37697	1.73516	0.65036	0.65293	1.78464	0.95497	0.5055	2.53961
ENSMUSG00000074738	0.76905	0.79781	0.81911	0.83876	1.57004	1.75192	0.42372	0.90844	1.46223	0.61614	0.85634	1.00106	0.70679	0.93879	0.73624	0.45439	0.92356	0.72964	-0.02243	1.07982	0.09246	1.21794	0.32361	0.58877	0.80002	1.13172	0.46408	0.72139
ENSMUSG00000074682	0.68557	0.61349	0.90401	0.82545	-0.09152	-0.02755	0.3498	0.02561	0.41543	0.84302	0.91022	0.99942	0.6227	0.88837	0.77513	0.8501	0.95275	0.76085	0.65242	0.48338	0.67118	0.68901	0.70648	0.79781	0.54955	0.76538	0.44428	0.52225
ENSMUSG00000074676	0.60792	0.74403	2.02503	1.69344	1.32251	1.66855	1.76935	1.43493	0.81133	0.50493	0.41997	0.46855	2.01681	0.50394	0.22438	1.36635	1.82387	1.05545	1.27205	2.00129	0.10904	0.7318	-0.69168	-0.06945	0.61847	-0.19706	-0.10362	0.25843
ENSMUSG00000074657	1.19395	0.09393	-0.22389	-0.19706	1.22746	1.30358	1.06717	0.64192	-0.477	0.59592	0.54786	0.31242	0.47166	0.92208	0.94782	0.86402	0.71464	0.05761	0.6337	0.42957	0.99998	0.26116	0.5772	0.49527	-0.26176	0.58027	1.3519	0.01459
ENSMUSG00000074656	2.05432	2.09196	2.15424	2.03856	2.23643	2.35568	2.02806	2.20922	2.21537	2.33408	2.15392	2.11139	2.1919	2.22859	2.28049	2.21858	2.26572	2.40856	2.11547	2.46242	2.3792	2.23983	2.12146	2.07341	2.49282	2.38673	2.03652	2.21093
ENSMUSG00000074643	2.27453	2.37361	2.4348	2.49112	1.98229	2.06114	2.0272	1.95586	1.63859	2.37059	2.48128	2.49282	2.4658	2.47292	2.50091	2.21604	2.34474	1.84367	1.48992	1.53454	1.69823	1.64143	1.59437	1.46366	1.60927	1.55992	1.61959	1.61372
ENSMUSG00000074622	1.89221	0.54838	0.41108	0.08514	1.5618	1.63878	0.45178	1.13528	0.33386	1.04077	0.97783	1.00769	0.99358	1.37322	1.61694	0.83667	0.41997	1.04741	1.45293	1.31981	1.46617	0.08774	0.80547	0.86552	0.20463	0.84805	0.97751	1.02744
ENSMUSG00000074619	1.49292	1.09504	1.28817	1.30096	1.21128	1.17476	1.28097	1.40966	1.58248	1.28785	1.21331	1.23875	1.18518	1.17965	1.34741	1.34523	1.22234	0.82069	1.65097	1.41844	1.24865	1.16919	1.29568	1.15308	1.33086	1.24851	1.25339	1.38387
ENSMUSG00000074582	1.77894	1.97205	1.644	1.74026	1.7468	1.49735	1.47174	1.28017	1.4355	1.78198	1.55298	1.48915	1.77423	1.69231	1.76051	1.92028	1.65112	1.87001	1.60686	1.88095	1.89997	1.73113	1.66991	1.50401	1.29927	1.60492	1.79507	1.68689
ENSMUSG00000074577	0.93574	0.35101	0.65778	0.7527	0.94836	0.93736	-0.41103	0.55802	1.43608	0.9832	1.15378	1.18002	0.96196	1.44485	0.83727	-0.13412	0.08086	1.88515	1.44287	0.62478	-0.39975	-0.81255	-0.14831	0.27455	-0.76648	-0.05583	0.3629	-0.11125
ENSMUSG00000074576	1.20001	1.20881	1.26321	1.10339	1.15569	1.24823	1.36544	1.36145	1.05159	1.02643	1.34375	1.34059	1.44717	1.26514	1.18919	1.16244	1.22417	1.15291	1.24111	1.42476	1.20536	1.35948	1.36776	1.60814	1.40116	1.46387	1.46598	1.30642
ENSMUSG00000074513	1.68182	1.43753	1.26891	1.18722	1.20362	0.81759	1.20021	1.11774	1.06717	1.22949	1.24675	1.20548	1.16104	1.10571	1.35627	1.3645	1.3145	1.6067	1.25317	1.4562	1.54011	1.34218	1.40509	1.38049	1.39784	1.43869	1.44825	1.34375
ENSMUSG00000074480	0.32274	0.68158	0.59531	0.77955	0.37597	-0.15348	0.09246	0.23277	0.84412	0.6158	0.47965	0.44781	0.4489	0.81555	0.81062	1.22711	1.00627	0.69983	1.00599	0.57268	0.7101	1.02502	1.14677	1.25568	0.77955	1.06972	1.2821	0.68204
ENSMUSG00000074476	1.02873	0.57843	1.79434	1.65261	1.45072	1.40679	0.75386	1.17497	1.47148	0.0401	0.77513	0.95205	0.86552	1.7212	0.95849	1.27634	1.27045	1.16081	1.23304	1.25854	1.18498	1.78126	1.05545	1.17518	1.8247	1.54362	1.02838	1.35695
ENSMUSG00000074457	1.67934	1.83557	1.79154	1.5714	1.50708	1.66781	1.48175	1.47464	2.31264	1.52891	1.78393	1.82029	1.97074	1.86189	1.69018	1.17236	1.43579	1.89475	1.59294	1.85784	-0.20708	1.81871	1.95797	1.9916	1.98397	1.91633	1.8821	1.87106
ENSMUSG00000074406	1.15776	1.39595	1.44873	1.42793	1.86132	1.90323	1.42928	1.54662	1.91633	1.66324	1.62872	1.73865	1.68577	1.71121	1.74265	1.36205	1.40161	1.35968	1.3956	1.6134	1.63427	1.55637	1.61283	1.85922	1.48451	1.7163	1.63611	1.58369
ENSMUSG00000074405	1.63648	1.32194	1.10749	1.28369	1.44382	1.42722	1.19079	1.13311	1.41102	1.90179	1.84293	1.94092	1.81871	1.91178	1.84487	1.68833	1.85584	1.80065	1.64556	1.66565	1.57929	1.77858	1.74152	1.95566	1.79525	1.84519	1.8013	1.80298
ENSMUSG00000074364	3.23758	2.81092	2.85241	2.9971	3.06066	3.08134	2.60265	2.68402	2.8726	2.82539	3.14335	3.25219	3.28347	2.93772	2.85923	2.95085	2.92151	2.79473	2.71394	2.96366	2.52062	2.88132	2.54597	2.6018	2.86994	2.77391	2.84381	2.67151
ENSMUSG00000074358	1.08957	1.23104	1.08534	1.03408	0.97783	1.13729	1.2596	1.29065	1.27255	1.49503	1.49099	1.54987	1.33859	1.67105	1.27812	1.42643	1.58762	1.71409	1.06177	1.21826	1.1639	1.50386	1.42377	1.5772	1.51504	1.45659	1.57111	1.50115
ENSMUSG00000074305	1.30252	1.58032	0.8351	1.47464	1.94342	1.50509	1.90432	1.75768	1.44222	1.51295	1.71151	1.55746	2.09948	1.78552	2.0651	2.13694	1.73687	1.46896	1.96957	1.68194	2.06396	1.96863	1.96316	1.5845	1.2735	1.26976	2.26459	1.57331
ENSMUSG00000074247	1.38049	1.52214	1.3845	1.49115	1.66964	1.99527	1.4907	1.64581	1.82301	1.66546	1.40339	1.62203	1.64237	1.69632	1.64728	1.44372	1.61174	1.77301	1.67846	1.94135	1.56323	1.83659	1.75157	1.87135	1.80637	1.92751	1.7075	1.78964
ENSMUSG00000074238	1.22693	1.06341	1.08474	1.14603	1.36109	1.21363	1.03445	0.93303	0.67068	0.72369	0.79918	0.70679	0.71358	0.92956	0.98082	1.35222	1.18662	1.3554	1.24033	1.31144	1.42215	1.01707	1.09101	1.10239	0.99892	0.8611	1.05742	1.03484
ENSMUSG00000074221	1.34489	-0.13028	0.28611	0.68398	0.58937	0.62846	0.69074	0.74372	0.01706	0.49644	0.42878	0.04472	0.84412	0.5684	0.70876	0.58818	0.50876	-0.07512	0.40084	-0.0721	0.73314	1.06134	0.83944	0.50175	0.38101	0.69581	0.92889	0.52283
ENSMUSG00000074220	1.36746	0.80034	0.70402	0.47235	1.21101	1.30554	1.16452	1.38927	0.42957	0.46855	0.42782	0.62846	0.67301	0.3498	-0.31505	1.05077	1.04096	0.46258	1.24805	0.95875	1.15378	0.98856	1.17582	1.12283	1.15435	0.62731	1.035	1.02304
ENSMUSG00000074212	1.08365	1.23359	1.01773	0.94753	1.35084	1.17236	1.18498	1.04077	0.9179	0.6738	0.78127	0.82883	1.0466	0.48515	0.668	1.5669	1.36221	1.2178	0.08774	1.08793	0.87149	0.73408	0.66729	0.6767	0.53474	0.53279	0.58146	0.32648
ENSMUSG00000074210	0.85546	0.83317	0.68012	0.88784	0.215	0.63884	0.14095	-0.94045	0.85579	0.18206	0.58937	0.63449	0.23277	-0.71505	-0.69168	0.70789	0.78488	0.90214	0.46321	0.85612	0.50175	0.59695	0.5567	0.76182	0.39943	0.58638	0.50673	0.48988
ENSMUSG00000074182	0.89428	1.24248	0.93358	1.03577	1.07998	1.03008	0.97486	0.96634	1.42199	0.93324	0.38601	0.37179	0.36903	1.33693	1.34025	1.51515	1.44351	1.22996	1.71486	1.78985	1.39712	1.35472	1.72048	1.67301	1.72312	1.58806	1.54636	1.87135
ENSMUSG00000074170	1.36964	1.45708	1.612	1.48287	1.15435	1.12506	1.59327	1.28998	1.72982	1.29165	1.56432	1.65326	1.18828	1.44888	1.42278	1.44602	1.76602	1.36915	1.58383	1.60785	1.68242	1.68182	1.66813	1.7236	1.57992	1.68971	1.72428	2.0272
ENSMUSG00000074141	0.5644	1.27796	0.87655	0.90368	0.63044	0.94546	1.19413	1.45023	1.05857	0.80492	1.42971	1.51789	1.3174	1.86733	1.66813	0.60694	0.62096	-0.11125	0.54508	-0.26176	0.38946	0.74846	0.56947	0.66203	0.66282	0.44185	0.5625	0.40148
ENSMUSG00000074102	1.66688	1.88255	1.95817	1.90455	2.01551	1.90624	1.84487	1.77401	1.90092	2.01948	1.87213	1.92843	1.94927	1.88957	1.81656	1.80876	1.89904	1.66943	1.61859	1.7498	1.76181	1.95893	1.98308	2.0851	1.90069	1.88058	2.0272	1.75913
ENSMUSG00000074088	1.49149	1.39897	1.69509	1.54987	1.54337	1.55719	1.60977	1.56836	1.72736	1.49292	1.22893	1.21516	1.42329	1.64972	1.56519	1.57607	1.65293	1.2656	1.32753	1.44485	1.51059	1.5716	1.45212	1.50509	1.67343	1.28981	1.48004	1.35346
ENSMUSG00000074064	1.44265	1.3883	1.25975	1.13311	1.40999	1.5076	1.7625	1.76459	1.50607	1.63472	1.35084	1.48544	1.54449	1.27696	1.11208	1.19489	1.43537	1.49346	1.70041	1.51963	1.62725	1.54251	1.73865	1.85173	1.41989	1.65974	1.75537	1.66733
ENSMUSG00000074063	0.98138	0.81555	1.21826	0.55437	1.26075	1.46896	1.96294	1.87227	1.33102	0.85612	0.74951	0.84122	0.87075	1.31144	1.23228	0.38354	0.21965	0.34227	1.16063	0.63044	-0.01924	1.13461	0.75776	0.96676	1.2722	1.08062	0.83317	1.4536
ENSMUSG00000074030	0.92333	1.35779	1.13291	1.1277	1.19551	0.94949	0.83199	0.87107	0.78377	1.05902	1.09918	1.20448	1.326	0.96112	0.97871	1.47208	1.20786	1.52634	0.9919	1.00861	0.63005	0.98676	1.02712	0.98785	0.83609	0.45976	0.93459	0.56383
ENSMUSG00000073987	1.23785	1.99739	1.38222	1.13997	1.4719	1.62459	1.68702	1.90494	1.5814	1.45743	0.97634	1.00529	0.98548	1.28837	1.32443	1.29516	1.20057	1.20622	1.70009	1.36308	1.85568	1.73952	2.00146	1.92484	1.88359	1.76526	2.04209	1.8842
ENSMUSG00000073982	1.57262	1.72982	1.6573	1.64757	2.0173	2.24161	1.904	2.01899	1.96389	1.65694	1.62065	1.71426	1.66909	1.73995	1.61004	1.76512	1.85523	1.81413	1.82182	1.81518	1.94734	1.82457	1.70793	1.90792	1.82643	1.84105	1.76446	1.75073
ENSMUSG00000073838	2.39623	2.16367	2.46745	2.26763	2.09326	2.16925	2.25121	2.30058	2.56322	2.07055	1.97504	2.00424	2.0158	2.1708	2.14459	2.24819	2.24503	2.34379	2.1978	2.34076	2.24325	2.33369	2.3654	2.40909	2.35152	2.34006	2.32488	2.35524
ENSMUSG00000073802	1.00277	1.52283	0.91365	0.91928	1.21363	1.30326	0.74156	1.09942	1.36746	1.08614	0.87655	0.85634	1.15936	0.64192	1.05724	1.03027	1.18433	1.42363	1.42825	1.57399	0.4357	0.65954	0.51769	0.68524	0.71135	0.75034	0.45976	1.24381
ENSMUSG00000073792	1.05176	0.94079	1.20786	0.99576	1.53622	1.54809	1.44106	1.44189	1.56373	1.36468	1.19018	0.94164	1.06341	0.78685	0.58318	1.23655	1.2249	0.63647	0.79612	1.05481	1.00551	0.92184	0.72708	0.69825	0.80161	0.89009	0.86299	0.89484
ENSMUSG00000073791	1.1517	1.1153	0.83876	0.78605	0.38505	0.48448	0.9339	1.0497	0.74338	0.79918	0.38011	0.38807	0.2347	0.68064	0.45582	0.51342	0.72404	1.04782	1.03361	0.94517	1.16919	0.9968	1.22996	1.25598	1.33339	0.96517	1.14072	1.22893
ENSMUSG00000073775	1.17743	1.29212	1.17987	0.93779	1.05481	1.29884	0.98238	1.15035	1.23901	1.29909	1.39103	1.46636	1.42061	1.35453	1.39007	1.3299	1.41393	1.26289	1.37061	1.5604	1.56053	1.31637	1.27812	1.44548	1.26341	1.39987	1.29402	1.12468
ENSMUSG00000073771	1.20839	0.73933	1.15308	1.0839	1.31192	1.08534	1.15275	1.13795	1.56647	0.94265	0.69714	0.75164	-0.76648	-0.01127	-0.54111	0.74053	0.93228	1.00352	0.76308	1.18002	0.75919	1.19508	0.83472	1.07341	0.86205	1.09875	0.99429	1.18217
ENSMUSG00000073758	0.68639	0.88406	-0.0721	0.45297	-1.50559	-0.76648	1.4126	1.45401	0.79843	0.30185	0.34765	0.66685	-0.01402	0.18944	0.08086	0.96517	1.29212	1.20426	0.31866	0.94861	0.475	-0.22972	-0.01402	0.3498	0.13604	0.15302	0.52417	0.48338
ENSMUSG00000073755	1.06941	1.00529	0.83349	0.85612	0.98548	0.58877	0.11995	0.52168	0.98963	0.90817	1.00106	1.00323	1.07779	0.88352	1.02412	0.24541	0.16509	0.91305	0.55437	0.82373	1.39357	1.13961	1.11221	1.1423	1.02095	1.17678	1.0765	0.98548
ENSMUSG00000073733	0.71657	0.87655	0.91694	0.70831	1.10317	1.25748	0.86084	1.03809	1.33678	1.1944	1.01578	1.03876	0.90941	0.71657	0.378	1.15112	1.64043	0.59122	0.71837	0.91813	0.19486	0.48988	0.18682	0.34765	0.40148	0.4489	0.1978	0.11465
ENSMUSG00000073730	1.96255	2.26799	2.51	2.40247	2.59783	2.82362	1.97348	2.00323	2.42774	2.49421	2.13813	2.19894	2.24225	2.65373	2.44421	2.37059	2.5211	2.27556	2.43883	2.59324	2.47866	2.42774	2.26699	2.34847	2.45288	2.42264	2.11715	2.26967
ENSMUSG00000073725	1.91904	1.57063	1.42163	1.44565	1.41102	1.4632	1.50187	1.35391	1.28502	1.63878	1.68577	1.60606	1.54422	1.38136	1.58544	1.71552	1.49947	1.65489	0.8169	1.58676	1.39227	1.36468	1.43181	1.35948	1.41972	1.4364	1.43322	1.45807
ENSMUSG00000073705	0.02347	0.42782	1.0636	0.82944	0.41763	0.77513	0.74403	0.96719	1.2797	0.31157	0.37597	0.33977	0.23797	1.15917	0.87802	1.13139	1.23804	0.71464	0.57843	0.57509	0.84269	0.91637	0.80698	0.91339	1.15524	0.58877	0.66104	0.87932
ENSMUSG00000073702	3.03893	2.79301	3.09289	3.04388	2.827	3.01355	2.63751	2.7026	3.00314	3.09964	3.02123	3.00314	2.99162	2.99397	2.8726	2.18511	2.47146	2.94848	2.77533	2.99397	2.90912	2.93991	3.06066	3.05726	3.13198	3.04675	2.95608	3.07217
ENSMUSG00000073700	2.07814	2.07026	1.64418	1.94861	1.78601	2.00444	1.96316	2.03878	2.08876	1.73085	1.94323	2.06946	2.01407	2.0604	2.08285	1.44455	1.37818	1.80655	1.50412	1.71985	1.35148	1.76602	1.7056	1.82425	1.59476	1.86622	1.74041	1.8821
ENSMUSG00000073684	-0.05883	0.92595	0.94981	0.96552	1.42231	1.6611	0.90702	1.24538	1.62935	1.79719	1.58848	1.69889	1.66575	2.18176	1.97165	1.03876	1.07796	0.80973	0.72293	0.98759	0.95275	1.11078	1.19508	1.22872	0.90078	1.09348	1.09101	1.1144
ENSMUSG00000073678	-0.21381	0.25298	0.50493	0.52168	0.53214	0.37179	0.04776	-0.19706	0.59877	0.27026	-0.04168	-0.26176	0.13431	0.15614	0.04963	0.77924	0.32971	0.53529	0.54342	0.09246	0.50098	0.78377	0.24844	0.20062	0.0766	0.01459	0.65413	-0.25013
ENSMUSG00000073676	1.69344	0.19125	1.00794	0.91871	1.4416	1.71257	2.03266	2.19758	2.47093	2.0114	1.8978	1.81164	1.80842	1.96345	1.83984	2.03221	2.28953	2.29623	1.49921	2.05898	1.94471	1.87806	1.76086	1.75816	2.23674	2.10884	1.69536	1.92377
ENSMUSG00000073664	1.09434	1.03027	0.76977	0.93688	1.75615	1.8747	1.47638	1.44918	0.92595	0.89605	0.75696	0.59165	1.21128	0.99529	1.12246	1.23204	1.06997	1.06523	1.21988	1.1588	1.11862	0.94635	1.02662	0.69019	0.41997	0.76085	0.91472	0.8789
ENSMUSG00000073643	1.67558	1.69147	1.6895	1.41789	1.34832	1.07602	1.16939	1.20301	1.10867	1.84313	1.45779	1.43719	1.53339	1.40448	1.41619	1.40642	1.01153	2.22786	1.81854	1.54337	1.23785	1.81817	1.75999	1.67314	1.37261	1.53339	1.61461	1.62754
ENSMUSG00000073640	2.7896	3.02743	3.06066	2.96611	2.91114	3.02743	2.73597	2.77533	3.20009	3.04675	2.67749	2.6511	2.57727	2.64689	2.63519	2.78503	3.01112	2.88624	2.94497	2.97251	2.89561	3.11633	3.08444	3.16576	3.18639	3.14335	3.02123	3.08444
ENSMUSG00000073639	1.83592	1.63847	1.61959	1.56432	1.88941	1.73701	1.5772	1.64061	1.61023	1.55284	1.63597	1.50587	1.61401	1.63487	1.83592	1.7625	1.63255	1.81396	1.67623	1.94717	1.83678	1.70885	1.88678	1.82532	1.80618	1.78878	1.83168	1.89729
ENSMUSG00000073616	0.69418	0.49454	0.59636	0.60839	0.58698	1.27237	0.98211	0.98603	1.90432	1.29466	1.62964	1.62346	1.20859	1.59294	1.45949	0.56094	0.69911	1.5891	1.02691	0.86704	0.32882	0.37903	0.91268	0.88324	0.73373	1.13483	0.78269	0.81062
ENSMUSG00000073609	0.90156	1.54636	1.29419	1.34643	1.35472	1.46636	1.64191	1.64922	1.75031	1.19754	1.51726	1.6573	1.61761	1.76908	1.5279	1.52842	1.84848	1.31564	1.13815	1.30371	1.10447	1.52677	1.52648	1.65798	1.43654	1.45261	1.57562	1.36368
ENSMUSG00000073563	1.26913	1.14251	1.08876	1.12207	1.33494	1.13353	0.97283	0.81353	0.8611	1.22811	0.94049	0.94635	1.05685	0.92066	1.03577	0.91144	0.76308	1.39865	1.30757	1.45049	1.53893	1.39103	1.44565	1.39357	1.48837	1.48675	1.53622	1.52368
ENSMUSG00000073557	0.72567	0.78269	1.24393	1.33754	0.4435	0.34294	0.8843	0.39871	0.26116	0.99701	0.30332	0.35395	0.15058	0.81881	1.01251	0.66604	0.15614	0.90485	0.605	0.50175	0.85448	0.62786	0.42114	0.10714	0.31738	0.32648	0.4435	0.67068
ENSMUSG00000073542	1.12207	0.84762	0.68765	0.97576	1.21538	1.18603	0.57218	0.67719	0.95472	0.89933	1.16143	1.05618	1.2676	1.25026	1.27045	1.01982	0.94981	0.86732	0.6094	0.91472	0.73842	0.83225	0.7098	0.48198	1.09666	0.89061	0.4425	0.55603
ENSMUSG00000073471	-0.20404	0.85546	0.44106	0.70309	0.57017	0.75064	1.05245	1.14822	-0.06549	0.16949	0.14857	0.31978	0.04963	0.57218	0.67015	0.53977	0.68849	0.57605	0.85935	0.05298	0.4033	0.78724	0.64305	0.75386	0.52107	1.23338	1.08173	1.10529
ENSMUSG00000073468	1.4738	1.71695	1.58575	1.68616	1.04686	1.16662	1.23804	1.28296	1.31039	1.35	1.34094	1.25293	1.24743	1.23304	1.22931	1.04027	1.35836	1.5814	1.60202	1.65191	1.4878	1.18018	1.49006	1.5347	1.45916	1.19731	1.44639	1.598
ENSMUSG00000073436	0.65242	0.91399	0.87964	0.64892	1.42518	1.52625	1.02474	1.14153	1.24918	0.74534	1.42299	1.51726	1.23756	0.38354	0.74338	0.34454	0.62846	1.37656	0.25136	0.18206	0.40746	0.25136	0.31738	0.41997	0.26116	0.47322	0.67876	0.7723
ENSMUSG00000073435	1.67781	0.90941	1.3234	1.28856	2.52062	2.7026	2.34994	2.53482	0.78928	1.03644	1.69615	1.74747	0.90401	1.22277	1.09504	1.03088	1.4608	1.2409	1.23852	1.05109	0.96492	1.1263	1.22234	1.388	1.15755	1.3293	1.21913	1.47084
ENSMUSG00000073434	0.635	1.00156	1.58295	1.47959	0.53143	0.72107	1.15227	1.08534	0.71926	1.42591	1.68971	1.7259	1.46184	1.572	1.37127	1.64345	1.84332	0.98036	1.0564	1.33723	1.40563	1.45817	1.41827	1.53069	1.70367	1.50237	1.42199	1.14085
ENSMUSG00000073433	0.48139	0.49644	0.7101	0.605	0.45896	0.83839	0.25843	0.58146	1.00573	0.28004	0.94394	1.11546	0.94104	1.19603	1.03484	-0.34763	-0.32512	0.30544	1.2866	1.94949	1.42825	0.52365	-0.09572	0.46977	0.81312	0.87802	-0.85647	-0.477
ENSMUSG00000073423	1.57766	1.27274	1.30298	1.24481	1.39262	1.5663	1.46809	1.5156	1.39817	1.31039	1.5891	1.61842	1.50999	1.43032	1.19791	1.27255	1.57212	1.66707	1.6134	1.61283	1.25317	1.53687	1.6037	1.70684	1.51618	1.61904	1.5409	1.62524
ENSMUSG00000073422	1.12077	0.95798	0.91117	0.84633	0.85634	1.33193	1.55001	1.44265	1.62215	1.0395	1.60338	1.61914	1.57948	1.68448	1.56256	0.84845	1.37033	1.51515	1.70854	1.16104	1.6478	1.29516	1.4632	1.60988	1.18282	1.68307	1.39534	1.81258
ENSMUSG00000073418	1.27491	2.25515	2.46172	2.38421	0.8504	1.10006	2.3808	1.69989	1.49277	1.93247	1.36431	1.45038	1.64684	0.86869	0.93856	0.88837	1.43181	1.78943	2.49282	1.69649	0.62731	1.30193	2.40068	2.49953	2.28334	2.7587	3.1113	2.62167
ENSMUSG00000073176	0.96229	0.82586	0.55493	0.65517	0.77637	0.7117	0.93324	0.63993	0.15302	0.90368	0.39432	0.26766	0.26238	0.17811	0.19921	0.26518	0.19921	0.6309	0.52671	0.59165	0.79384	0.5514	0.71358	0.66055	0.55437	0.50806	0.69581	0.46977
ENSMUSG00000073139	1.23338	0.75663	0.33172	0.55317	1.27856	1.25043	1.42299	1.46516	1.32691	1.23738	1.49167	1.64191	1.49767	1.60756	1.48377	1.13774	1.18862	1.23304	1.25406	1.21624	1.16143	1.39817	1.4391	1.4087	1.22234	1.22977	1.4922	1.40642
ENSMUSG00000073131	0.9179	0.15928	0.22568	0.39943	0.71403	0.71742	0.87149	1.03329	0.92208	1.44337	1.37704	1.44804	1.26535	0.86616	0.8533	0.21675	0.13938	1.2039	0.99002	1.29516	1.05832	0.73269	0.75587	0.77439	0.79431	0.71882	0.59592	0.5625
ENSMUSG00000073096	1.46462	1.12026	0.66427	0.97144	1.18662	1.31113	0.55025	0.9444	0.88352	0.77988	0.91305	1.02502	0.81203	0.81759	0.80002	0.34108	0.49644	1.17108	0.58877	1.18958	0.25587	1.29085	1.04027	1.22042	0.95472	1.30392	0.74013	1.22949
ENSMUSG00000073062	1.1584	1.47339	1.29729	1.4546	1.46852	1.45244	1.5473	1.4453	1.44304	1.85478	1.28398	1.27832	1.37294	1.49628	1.4138	1.25272	1.1255	1.27595	1.02008	0.9552	1.37838	1.15656	1.15057	1.23154	1.09605	1.05742	1.37692	1.20704
ENSMUSG00000073016	1.26976	1.09047	1.28369	1.24743	0.91992	0.97254	0.67068	0.74788	0.80194	1.56531	1.67069	1.50574	1.51331	1.05703	1.43143	1.23047	1.0395	0.1293	0.31036	0.38601	0.27174	0.54453	0.32971	-0.00222	-0.30789	-0.06549	0.48515	-0.48696
ENSMUSG00000072964	1.75246	1.04056	0.84845	0.67205	0.49878	0.60792	0.59766	0.05445	1.28751	-0.27314	0.80333	0.54392	0.42782	0.38505	0.82758	0.61991	0.18864	1.14304	1.05245	0.47916	0.98575	1.16629	1.38036	1.28449	1.39503	1.25026	1.11164	1.46201
ENSMUSG00000072946	1.56385	1.13118	1.12336	1.15212	0.88501	0.92956	0.91896	0.96196	1.31923	1.30979	1.28129	1.31981	1.00687	1.02146	1.18625	1.42857	1.42429	1.39897	1.53712	0.88746	0.93135	0.81591	0.78685	0.83696	1.0996	0.69947	1.05352	0.99811
ENSMUSG00000072889	0.96872	1.10122	0.86084	0.95935	1.03219	0.90271	1.50607	1.35254	1.35968	1.25339	1.09328	0.96353	0.9928	1.04686	1.04312	1.20995	1.39007	1.02028	1.25011	1.0765	1.30004	1.326	1.40623	1.31889	1.42163	1.41027	1.26428	1.38095
ENSMUSG00000072872	0.99787	1.5208	1.26976	1.35453	1.0964	0.92494	0.75663	0.92184	1.07911	1.40381	1.49443	1.51935	1.28195	1.36604	1.28869	0.97086	0.79161	0.92383	1.58689	1.2105	1.25339	1.11208	1.23172	1.15736	1.01003	1.0476	0.98369	1.13564
ENSMUSG00000072825	1.75629	2.03203	1.93577	2.10859	2.46511	2.25996	1.77653	1.8145	2.13729	2.04034	2.1125	2.2426	2.13315	1.84717	1.98067	2.1875	1.95705	2.35196	2.22199	2.06536	2.3281	2.13371	2.1261	2.25004	2.0158	2.13877	2.25471	2.00545
ENSMUSG00000072812	2.48471	2.61193	2.24122	2.08636	2.55589	2.58485	2.60588	2.72127	2.2299	2.37264	2.81425	2.88624	2.5363	2.19583	2.33461	0.96229	1.27106	2.54942	2.95608	2.71139	2.42918	2.19724	2.9182	3.02123	2.10774	2.10372	2.72818	2.45169
ENSMUSG00000072772	2.0085	1.65502	2.02886	1.91939	1.85885	1.9666	1.9499	2.0244	2.15733	1.83816	2.08663	2.09875	1.82045	1.88741	1.69721	1.72471	1.96316	2.16338	1.80917	1.79418	1.93758	2.11715	2.27129	2.39947	2.05262	2.27082	2.27556	2.25915
ENSMUSG00000072704	0.51294	0.65375	0.54342	0.43888	0.3629	0.22438	0.35907	0.33977	0.35506	0.66104	1.34915	1.35968	1.22202	0.88025	0.78308	0.28328	0.23098	0.85069	0.71424	0.69581	0.52417	0.34294	0.40746	0.26369	0.36689	0.46028	0.20795	0.36983
ENSMUSG00000072640	0.76182	0.23949	0.30332	0.20062	0.17428	0.54255	0.82853	0.90309	1.03809	0.73971	0.72369	0.9149	0.37529	0.52012	0.49454	0.32127	0.00107	0.29209	-0.03776	0.1853	0.11465	-0.00456	0.18032	-0.18535	0.16722	0.41763	-0.00662	-0.18535
ENSMUSG00000072582	1.41141	1.60963	1.74428	1.54525	1.1462	1.50294	1.54142	1.68043	1.8232	1.56228	1.65779	1.59294	1.49503	1.42675	1.33955	1.2301	1.29381	1.41057	1.35935	1.58434	1.37597	1.20661	1.44918	1.45793	1.47208	1.22101	1.38375	1.1914
ENSMUSG00000072501	1.33073	1.73445	1.60237	1.65147	1.54044	1.43737	1.60419	1.38334	1.31316	1.62176	1.5418	1.43067	1.60251	1.43788	1.5396	1.3339	1.3685	1.3213	1.25358	1.4559	1.74507	1.41431	1.54588	1.37387	1.34218	1.37387	1.64043	1.50574
ENSMUSG00000072476	1.68833	1.78198	1.71923	1.68011	1.66026	1.62964	1.6478	1.60899	1.93706	1.53712	1.51902	1.61577	1.66124	1.78828	1.59845	1.7381	1.71771	1.81277	1.93324	1.85844	1.67412	1.93683	1.76951	1.92578	1.86054	1.87843	1.79917	1.71277
ENSMUSG00000072258	0.50237	1.21346	0.75732	0.92356	1.2805	1.23824	1.4691	1.36519	1.23204	2.02886	1.1584	1.17108	1.05618	1.11059	0.98389	1.05352	1.1661	0.74788	0.7644	0.16123	0.84697	0.48835	0.87107	0.84056	0.65468	0.72708	0.92834	0.95956
ENSMUSG00000072082	0.66574	0.62385	1.72944	1.78301	0.77719	0.53022	0.70754	0.16509	1.20098	0.98899	0.83051	0.90337	1.09455	1.75504	1.02328	1.34422	1.05077	0.4263	0.70049	1.12645	0.74991	1.5103	0.83609	0.9516	1.75615	0.80161	0.635	0.64735
ENSMUSG00000071984	2.56322	3.28347	2.29623	2.73044	2.47292	2.56624	3.22344	2.93478	2.57459	1.04292	0.34454	0.43181	0.4435	1.42544	2.18456	1.15072	1.51726	1.55439	2.07814	2.62258	3.06321	2.46047	2.60689	2.61612	2.13371	2.55992	3.08444	2.3034
ENSMUSG00000071856	1.16063	1.15419	0.12685	0.09615	1.4827	1.01707	1.14363	1.43821	1.04077	0.39871	0.61219	0.37903	0.84728	-0.25013	0.49055	1.3718	1.11726	1.24538	0.54042	1.33787	1.64489	1.07982	1.41641	1.25507	0.82347	0.90717	1.40448	0.5644
ENSMUSG00000071855	0.83638	1.02502	0.82656	0.82721	0.70402	0.91419	1.10995	1.25124	1.00815	1.13594	1.20606	1.12831	1.08667	0.99862	1.02447	1.12099	1.08062	0.94782	0.66604	0.98575	1.24764	0.97909	1.22179	1.25043	1.17431	0.85266	1.09328	1.17388
ENSMUSG00000071847	0.08269	-1.13074	0.75877	0.26238	1.16122	0.88587	2.32898	2.08562	0.84805	1.52878	0.45297	0.46787	0.16509	1.66546	1.15112	0.95875	1.39865	1.81108	2.16803	1.19117	0.65091	-0.37415	0.5625	0.65842	0.26518	-0.07512	-0.64898	0.31519
ENSMUSG00000071757	1.14698	1.49735	1.64715	1.56717	1.25764	1.12468	1.07406	1.14763	0.97751	1.25581	1.1639	1.14603	0.82853	0.97909	0.99227	1.45605	1.48627	1.68339	1.52228	1.2465	1.57033	1.55992	1.69375	1.66964	1.4146	1.62795	1.45779	1.60785
ENSMUSG00000071748	1.13095	0.80067	0.41468	0.5567	0.98676	0.70946	0.50493	0.77481	1.16629	0.60383	0.72708	0.72618	0.86939	0.842	0.8823	0.45896	0.46198	0.42515	0.27455	0.44106	0.79325	0.89219	0.76352	0.86326	0.88324	0.96353	0.86486	0.73897
ENSMUSG00000071711	1.39243	1.54987	2.00044	1.86892	-1.06296	-1.50559	1.52158	1.58575	1.85922	1.904	2.04338	2.1475	2.04693	2.26572	2.07417	1.65779	1.89091	1.90017	1.42626	1.33563	1.60458	1.64757	1.36221	1.50866	1.6067	1.72622	1.43268	1.53605
ENSMUSG00000071708	1.82095	1.64684	1.40257	1.35779	1.97549	2.09326	1.56344	1.60057	1.64462	1.50894	1.51377	1.3808	1.56458	1.22728	1.37374	1.873	1.7945	1.03088	1.29065	1.44337	1.33678	0.95701	1.01268	1.01175	1.39574	0.69983	0.963	0.65326
ENSMUSG00000071669	1.70576	1.39964	1.07187	1.04803	1.48627	1.03752	1.35577	1.30171	1.31055	1.35595	1.40366	1.63859	1.34254	1.37407	1.3404	1.43894	1.38173	1.42504	1.12831	0.89933	0.94861	1.09563	0.9819	0.86965	0.78451	0.57563	0.96112	0.83317
ENSMUSG00000071662	1.85859	1.37521	1.8732	1.70645	1.66688	1.87106	2.01925	2.19399	1.97348	1.96512	1.8414	1.8529	1.93288	1.69147	1.83715	1.47443	1.7018	1.62415	1.55566	1.89204	1.83859	1.7752	1.99901	1.96839	1.77083	1.78585	1.85681	1.80859
ENSMUSG00000071661	1.12609	1.15587	0.98138	0.97254	0.87655	0.99358	0.01938	0.31738	1.09799	0.91472	0.97486	1.0466	0.96377	1.01153	0.86815	0.27922	0.45178	0.778	0.43956	1.10291	0.90485	0.88807	0.94203	1.05159	0.90244	0.87046	0.97557	0.55317
ENSMUSG00000071660	1.13311	0.59766	0.57563	0.48338	1.01175	1.13547	0.668	0.84385	0.88784	0.45297	0.36433	0.37346	0.12482	0.58146	0.6059	0.98923	0.9677	1.12571	0.5462	0.65375	-0.00456	0.10714	0.59122	0.41375	0.10303	0.25136	0.46562	0.32274
ENSMUSG00000071659	2.67317	2.59147	2.53748	2.50091	2.47146	2.39012	2.48471	2.4591	2.3281	2.45015	2.45501	2.33865	2.39067	2.38564	2.39855	2.39816	2.42977	2.36596	2.11907	2.39405	2.39012	2.3808	2.45288	2.33132	2.48128	2.3048	2.33616	2.40174
ENSMUSG00000071657	2.27865	2.1796	1.98397	1.97786	2.11857	2.2867	2.48898	2.64519	2.2498	1.90964	2.28586	2.29162	2.16567	1.88568	1.86189	2.05898	2.19373	2.20536	2.08716	1.89325	1.84238	2.02746	2.0244	2.03724	2.06921	2.00635	2.01681	2.23719
ENSMUSG00000071656	1.59228	0.49527	1.17454	1.0098	1.2409	1.22234	0.56026	0.33172	1.05742	2.23983	1.65326	1.67643	1.40116	1.8745	1.67846	0.62417	0.71837	1.2981	-0.71505	0.91399	-0.33859	0.05761	-0.00662	-0.00905	-0.477	-0.49418	0.41997	0.40844
ENSMUSG00000071655	1.98936	2.56709	2.54531	2.45667	2.28697	2.40765	2.41619	2.49046	2.40115	2.50284	2.34379	2.32111	2.31091	2.25094	2.20663	2.28096	2.3956	2.36158	2.32559	2.26333	2.26537	2.26733	2.47146	2.4348	2.34847	2.3775	2.4704	2.46112
ENSMUSG00000071654	1.11862	0.51769	1.28901	1.27137	1.49921	1.73098	0.7678	1.20726	1.04273	0.98405	1.30642	1.31564	0.99892	0.55083	0.31519	-0.61062	-0.97204	1.07081	0.99652	1.09262	1.27595	1.08559	1.49129	1.50659	1.16081	1.42971	1.25814	1.4691
ENSMUSG00000071652	1.85823	1.91234	2.1209	2.01634	1.90092	2.00754	2.04693	2.01551	1.94861	1.69079	1.99458	2.08636	2.06946	2.13571	2.12448	1.81926	1.85802	1.89487	1.78164	1.90467	1.83449	1.96721	2.00323	2.08427	1.90717	1.96484	2.03367	1.79614
ENSMUSG00000071650	2.49886	2.56624	2.90912	2.89384	2.67317	2.52914	2.90052	2.96366	2.83988	2.58573	2.84762	2.86171	3.18639	2.85241	2.83508	2.56709	2.65475	2.68312	2.42685	2.53482	2.67151	2.56403	2.65475	2.56322	2.46963	2.64689	2.72496	2.43883
ENSMUSG00000071649	2.02886	1.9842	2.07771	2.01971	2.33369	2.24584	2.7026	2.83785	2.37975	1.66763	1.76618	1.84293	1.87826	1.7327	1.7212	1.9524	2.09804	1.72928	1.61594	1.91633	1.56193	1.56149	1.8191	1.92794	1.59647	1.88759	1.83241	1.76843
ENSMUSG00000071648	-0.33859	0.6059	0.90622	0.5644	-0.31505	1.66362	0.89484	0.92806	0.81938	0.54255	1.50084	1.52607	0.98785	1.44655	1.33211	1.05572	1.25764	0.93324	1.43821	1.18498	0.7639	1.1166	1.10956	1.26875	1.12831	1.55535	1.14569	1.3145
ENSMUSG00000071647	2.06114	1.97527	2.33085	2.25834	2.25515	2.46385	2.51757	2.47218	2.35779	2.20884	2.14133	2.22379	2.04138	2.23983	1.94092	2.07026	2.21945	2.23102	2.28166	2.22102	1.97923	2.20437	2.19965	2.19445	2.31729	2.33408	2.12422	2.33229
ENSMUSG00000071646	2.38261	2.69481	2.89175	2.87665	2.30521	2.27129	2.33278	2.41191	2.41113	2.50208	2.21246	2.20413	2.28096	2.4704	2.34429	2.3263	2.40115	2.29588	2.25063	2.24092	2.23842	2.28815	2.46963	2.46963	2.28461	2.17137	2.43293	2.25562
ENSMUSG00000071645	1.68802	1.60927	1.77216	1.7348	1.58689	1.7025	1.64357	1.73219	1.75371	1.73893	1.78378	1.81625	1.81672	1.74888	1.60619	1.81091	2.0103	1.90902	1.59909	1.70268	1.60863	1.62346	1.69989	1.84614	1.65424	1.66927	1.76014	1.67013
ENSMUSG00000071644	3.2324	3.48813	3.87665	3.83383	3.45881	3.45881	3.22814	3.33924	3.65556	3.42857	3.36558	3.42857	3.46717	3.42857	3.38829	3.26527	3.33924	3.46717	3.32459	3.54814	3.40943	3.4788	3.35946	3.34633	3.56103	3.51406	3.38105	3.3073
ENSMUSG00000071573	0.0766	0.80161	0.33876	0.45779	0.3498	0.4551	0.70711	0.82656	0.93688	0.90337	0.99046	0.83944	0.89121	0.61527	0.73106	0.50445	0.38505	0.67015	0.98739	0.1104	1.12669	1.01175	0.48835	0.51505	1.47244	1.48978	0.24232	1.29099
ENSMUSG00000071547	1.37937	2.07547	2.11791	2.01751	2.03221	2.36015	1.48004	1.58602	2.29012	2.07509	1.68702	1.73219	1.904	2.00277	1.75428	2.19301	2.43607	1.6798	1.62472	0.53529	2.22068	1.65518	1.10799	1.31298	1.25467	2.10661	1.03667	1.30424
ENSMUSG00000071533	1.85614	1.62162	1.67752	1.6035	1.5037	1.48076	1.27719	1.13461	1.48897	1.72781	1.74055	1.68782	1.56162	1.6037	1.5591	1.75816	1.58558	1.40736	1.6721	1.68043	1.78842	1.64828	1.76101	1.68658	1.82565	1.67047	1.72407	1.72506
ENSMUSG00000071528	1.4966	1.51789	1.71812	1.63472	1.34121	2.04909	1.40005	1.51981	1.86929	1.47665	1.64253	1.70944	1.39329	1.2866	1.31637	1.44304	1.46241	2.00877	1.43021	1.54835	1.51774	1.61049	1.61112	1.78522	1.79541	1.97074	1.54079	1.6829
ENSMUSG00000071497	1.48915	1.43568	1.67377	1.71599	1.53069	1.72568	1.38222	1.59533	1.76135	1.61682	1.69649	1.68647	1.64462	1.71257	1.59065	1.82657	1.74538	1.60711	1.6035	1.87243	1.50201	1.58746	1.54208	1.54278	1.65832	1.58231	1.54433	1.36725
ENSMUSG00000071477	1.75127	1.849	1.98596	1.95259	1.81871	1.88828	1.67448	1.73865	2.06114	2.08345	1.89475	1.96531	1.92343	1.96436	1.88982	1.70367	1.77454	1.79749	1.94135	1.89956	1.86132	1.863	1.99739	2.07654	1.904	1.94185	2.01971	1.90302
ENSMUSG00000071454	0.65719	1.26723	1.47013	1.34726	1.35695	1.54973	1.67888	1.51178	1.67343	1.1588	1.03088	1.21589	1.17902	1.23191	1.27288	0.91419	0.99836	1.33989	1.26412	0.63739	0.58146	1.53605	1.55652	1.62524	1.6798	1.49052	1.60743	1.66873
ENSMUSG00000071451	1.5471	1.65053	1.51902	1.46294	1.33922	1.5468	1.65066	1.7217	1.66943	1.83363	1.35017	1.37597	1.49129	1.34741	1.32895	1.68634	1.85964	1.5339	1.10629	1.32057	1.65562	1.41363	1.45916	1.49519	1.64808	1.57734	1.3174	1.51761
ENSMUSG00000071415	2.99162	3.01599	3.21121	3.13198	2.97511	3.15084	2.81623	2.86171	3.15084	3.21921	2.99997	2.95329	2.99397	2.95329	2.92598	2.90527	3.04163	3.05726	2.91614	2.98351	3.03893	2.97777	3.11633	3.11373	3.20009	3.10551	2.99397	3.08134
ENSMUSG00000071369	0.91736	1.99876	0.83472	1.23028	1.30623	1.44337	0.20204	0.64847	-0.22389	1.48692	0.06128	-0.03506	0.42288	1.48204	1.86622	1.24033	1.33303	0.70679	1.01061	0.59078	1.91574	-0.03506	-0.57351	-0.59299	0.24981	0.10605	-1.20595	-0.13412
ENSMUSG00000071359	1.05767	0.9523	1.1418	0.96584	0.88557	0.96163	0.98258	1.13172	0.65293	1.13225	0.94517	0.87834	0.94265	0.98633	1.04615	0.81664	0.95133	1.31889	0.98963	1.32793	1.34218	1.16959	1.16304	1.15936	1.36163	1.36383	0.96975	1.15132
ENSMUSG00000071350	1.0834	0.96676	0.61406	0.66888	0.70907	0.71318	0.73269	0.72217	1.01338	0.19647	0.138	0.30827	0.02893	-0.1396	-0.01402	0.58318	0.65293	0.4744	0.8611	0.81911	1.08833	1.09201	1.27491	1.17987	1.44145	1.00156	1.08039	1.28981
ENSMUSG00000071337	1.04378	1.37692	1.4506	1.57426	1.35846	1.1762	1.22069	1.20763	1.21726	1.3133	1.12609	1.06825	1.02662	1.12183	0.92956	1.3845	1.34174	1.21638	1.21969	1.03577	1.16472	0.91545	1.2663	1.13693	1.05954	1.21378	1.27288	1.09142
ENSMUSG00000071253	1.10594	0.9383	0.79959	0.87932	1.17877	1.04189	1.19117	1.15088	0.8866	1.15193	1.16729	0.99529	1.10466	0.77762	1.11597	1.05431	1.01202	1.15242	0.96229	0.82656	0.90844	0.91117	0.8279	0.73754	0.67331	1.022	0.93431	0.83609
ENSMUSG00000071252	0.65911	0.7767	0.5055	0.28847	0.36903	0.79239	0.56947	0.68262	0.63306	0.76748	0.35988	0.43092	0.58415	0.13092	0.28328	0.43023	0.06275	0.67166	0.27576	0.15811	0.87859	0.5567	0.66055	0.69138	0.45178	0.71403	0.60891	0.82944
ENSMUSG00000071180	1.13266	0.95275	0.94815	0.67586	0.85069	0.86847	0.5709	0.62478	0.79325	0.94815	1.14997	1.11846	1.05404	0.99166	1.07448	0.91896	0.81881	0.8513	0.79325	0.89736	0.69074	0.65911	0.821	0.64766	0.74013	0.82069	0.73504	0.68849
ENSMUSG00000071176	1.96992	2.31592	2.10753	2.31844	1.93288	1.81942	2.04111	1.98537	1.80675	2.2426	2.09702	2.12422	2.02909	2.11193	2.13969	2.32411	2.32587	1.73878	2.04585	2.29954	2.0552	2.21924	2.03796	1.98229	2.0854	2.15392	2.14212	2.04929
ENSMUSG00000071172	1.77732	1.92506	2.26269	2.22335	2.05979	2.07081	1.58575	1.81486	1.92151	1.81471	1.80079	1.74026	1.96992	1.88874	1.85681	1.95893	1.82812	1.80458	1.90357	1.86396	1.94323	1.80186	1.79209	1.70513	1.95853	1.86986	1.63461	1.66373
ENSMUSG00000071151	1.81209	1.7828	1.76618	1.73618	1.83492	2.00107	1.73731	1.98958	2.19158	2.17305	2.01551	2.04585	1.91804	1.86986	1.90824	1.77245	1.97483	2.20729	1.82687	2.07001	1.77556	1.78447	1.78814	1.92464	1.80239	1.86423	1.80823	1.78552
ENSMUSG00000071078	0.88138	0.78987	0.5514	0.29782	0.91761	1.06134	0.93736	1.23501	1.43537	0.51158	0.56947	0.75349	0.69581	1.04503	0.86299	0.60006	0.50175	1.34358	1.38507	0.53143	0.90744	1.19464	1.13291	1.30282	1.36689	1.45549	0.99017	1.26289
ENSMUSG00000071076	2.22501	2.46468	2.36849	2.42534	2.56895	2.65231	2.0768	2.28134	2.32016	2.4591	2.1796	2.2489	2.10076	2.41368	2.09948	2.19266	2.36215	2.74676	2.58573	2.55016	2.27375	2.38421	2.45015	2.7026	2.34518	2.54198	2.60067	2.31185
ENSMUSG00000071074	2.50489	2.23889	2.13148	2.114	2.48205	2.56994	2.38871	2.3749	2.39668	2.37405	2.45383	2.45996	2.44886	2.49151	2.45068	2.28815	2.4167	2.42685	2.30433	2.24325	2.2147	2.23159	2.39736	2.4805	2.19399	2.44683	2.40909	2.41861
ENSMUSG00000071073	0.31242	-0.01127	0.26238	0.50806	0.96229	1.0834	1.21433	1.38415	1.05923	0.82822	0.74615	0.99787	0.62385	0.54392	0.1293	0.65842	0.86552	0.51643	0.53094	0.41468	0.53529	-0.12442	0.46926	0.83445	-0.67244	-0.39298	0.41543	-0.01654
ENSMUSG00000071072	1.91216	1.89091	1.96591	2.03796	1.84568	1.9098	1.74995	1.78755	1.84757	1.99937	1.87429	1.76951	1.88891	1.66724	1.75331	1.95676	1.86754	2.08786	1.90264	2.08452	2.04929	1.92794	1.92225	1.83192	2.07944	1.81942	1.87571	1.92167
ENSMUSG00000071064	1.09312	1.05352	1.35779	1.36034	1.3993	1.326	1.05618	0.97338	1.37616	1.10571	1.09719	1.12026	1.06448	1.27812	1.38784	1.46307	1.31981	1.23266	1.45575	0.80492	1.22673	1.31276	1.40241	1.4364	1.3145	1.35346	1.44265	1.14738
ENSMUSG00000071037	1.30298	1.08039	0.79239	0.94479	0.78566	0.81664	0.4536	0.41303	0.68204	0.89366	0.45047	0.39509	0.33876	0.47571	0.47749	0.68351	0.8351	1.02113	0.19125	0.92747	1.00203	0.43888	0.40495	0.28709	0.61162	0.82142	0.33474	0.21252
ENSMUSG00000071014	1.81277	1.5678	1.81886	1.7547	1.54651	1.82886	1.76618	1.73651	2.18975	1.74409	1.80337	1.80399	1.68182	1.7686	1.65832	1.72458	1.78755	2.2355	1.85221	1.79318	1.81734	1.83608	1.98266	1.95833	1.91278	1.9809	1.92829	1.96863
ENSMUSG00000070972	1.53426	1.46809	1.5159	1.23515	1.33821	1.44205	1.44363	1.52214	1.40767	1.47788	1.58999	1.5081	1.42743	1.17454	1.19183	1.34358	1.36352	1.73687	1.42031	1.45725	1.65918	1.23381	1.24127	1.21726	1.40075	1.43067	1.07116	1.22872
ENSMUSG00000070953	0.97283	1.30721	1.4546	1.42504	0.40581	0.56565	1.17965	1.19718	1.5212	1.68844	1.37872	1.44265	1.32618	1.41503	1.33246	1.00277	1.33968	1.76635	1.39987	1.59419	1.52368	1.30541	1.46435	1.4907	1.44005	1.34235	1.40398	1.53743
ENSMUSG00000070939	1.20638	1.59631	1.6037	1.52033	1.62443	1.52502	1.47537	1.37227	1.29321	0.90457	1.26856	1.33377	1.40695	1.25874	1.3174	1.42048	1.32753	1.69536	1.46636	1.42743	1.51805	1.26694	1.34757	1.39743	1.06177	1.14779	1.42889	1.38189
ENSMUSG00000070934	2.15217	2.27631	2.07318	2.06593	1.85764	1.96693	1.97965	1.96132	2.38514	2.05561	2.22002	2.09766	2.16055	1.91086	2.08617	2.24008	2.29358	2.43097	2.32146	2.03266	2.23414	1.98397	2.22068	2.15301	2.21049	2.28134	2.17825	2.39067
ENSMUSG00000070871	1.34832	1.80917	1.04027	1.33771	1.75674	1.61616	1.23852	1.41363	1.28333	1.40708	1.14464	1.1584	1.43683	1.05404	1.16708	1.27856	0.88784	0.98676	1.24381	0.85448	1.06913	0.94517	0.75164	0.68719	0.81203	0.69218	0.62385	0.89121
ENSMUSG00000070867	2.39947	1.17008	0.78533	0.50493	-0.08439	0.41203	-0.51309	0.07223	1.56809	1.10629	1.24381	1.38942	0.96431	0.62956	0.37903	1.87172	2.08993	0.89643	1.2676	1.36127	0.40148	1.72568	0.91447	1.02985	1.47738	2.07108	0.78377	1.44174
ENSMUSG00000070858	0.938	1.02008	1.16662	1.47638	1.07341	1.47942	1.28129	1.5822	1.32146	-0.1802	1.44994	1.51259	1.47665	1.56485	1.43939	1.19584	1.36017	0.68557	1.40736	0.86354	0.93933	1.02958	1.3774	1.55489	0.79678	1.33102	1.19603	1.28923
ENSMUSG00000070814	0.51015	0.71514	0.91053	0.81788	1.3888	1.31564	1.54848	1.59264	0.95701	0.97391	0.72181	0.8498	0.45847	0.64397	0.76714	0.5828	0.96055	1.05109	1.14569	1.14844	1.3339	1.30171	1.52139	1.5339	1.45174	1.40448	1.56836	1.43095
ENSMUSG00000070808	1.21638	1.40724	1.31378	1.50478	1.65082	1.6037	1.47294	1.42793	1.36531	1.66026	1.86246	1.98753	1.73254	1.5891	1.79917	1.44937	1.61859	2.11278	1.94655	1.83816	1.5928	1.66362	1.62117	1.873	1.7296	1.72909	1.69933	1.75175
ENSMUSG00000070738	1.94168	1.44578	1.60587	1.78089	1.51259	1.4311	1.9378	1.36984	1.65341	1.73445	2.13371	2.22034	1.99414	1.97461	1.88292	1.81965	1.66514	1.63487	1.33439	1.42757	1.86108	1.73687	1.81871	1.80052	1.52012	1.6684	2.01235	1.54506
ENSMUSG00000070737	0.44981	0.09246	0.32274	0.40746	0.81035	1.15435	0.842	0.96676	1.22916	1.04312	1.14891	1.19117	1.20482	1.18452	1.10571	-0.03166	0.64892	0.92776	-1.50559	0.26369	0.35907	0.14666	0.67432	0.53363	0.80907	0.83349	0.74096	0.67543
ENSMUSG00000070733	1.38927	1.66546	1.44005	1.7343	1.95817	1.80782	1.63949	1.45308	1.25568	1.78776	1.41769	1.25026	1.496	1.59165	1.66013	1.75204	1.43882	1.47909	1.63677	1.46223	1.80618	1.89936	1.80514	1.50944	1.44124	1.48482	1.80106	1.49748
ENSMUSG00000070730	1.08242	1.29034	1.1808	1.06738	1.29896	1.1659	1.42675	1.62935	1.32264	1.06972	1.38957	1.41827	1.56149	1.22595	1.22087	1.03008	1.18561	1.3266	1.37872	1.37309	1.37468	0.98725	1.15308	1.23924	1.14803	1.15019	1.13397	1.1462
ENSMUSG00000070720	1.6453	1.11984	1.28284	1.16434	1.54492	1.43788	0.74762	0.78377	0.49221	0.98341	1.58311	1.65779	1.50148	1.28565	0.93609	0.43356	0.78181	0.29782	0.74191	0.55802	0.5567	0.26766	0.26647	0.66975	0.35907	0.78377	0.33172	0.08774
ENSMUSG00000070699	1.33494	1.63964	1.6301	1.60852	1.45642	1.54337	1.04056	1.29781	1.75331	1.4902	1.60138	1.66336	1.55316	1.6976	1.52776	1.38579	1.613	1.04351	1.39848	1.56963	1.57178	1.60756	1.54695	1.7163	1.42182	1.70195	1.59015	1.48451
ENSMUSG00000070697	1.5604	1.55581	1.66406	1.46475	1.64302	1.741	1.51532	1.55875	1.57366	1.69459	1.0834	1.06448	1.11812	1.35662	1.42733	1.77134	1.80917	1.66441	1.72849	1.87628	1.71614	1.6067	1.95312	1.86733	1.932	1.75127	1.76121	1.74942
ENSMUSG00000070643	0.80749	1.5471	1.01316	0.88952	1.21082	1.27477	0.7179	1.12506	0.14483	1.0564	1.41895	1.52904	1.35836	1.58575	1.56485	0.94496	1.10973	0.4536	1.19216	0.30094	0.43675	1.05685	1.03109	1.16211	1.07465	1.13461	1.10191	1.14763
ENSMUSG00000070639	0.44688	0.48448	0.59435	0.45847	1.11059	0.87269	0.71135	0.82822	0.95849	1.05031	0.18206	0.2899	0.65036	-1.01334	-1.68499	0.93192	0.56324	0.16123	0.6929	1.05326	1.21853	1.03384	1.0588	0.97662	0.76941	0.87687	0.74788	0.84762
ENSMUSG00000070576	0.72964	1.12135	1.25393	0.67331	1.79318	1.43702	0.6268	0.73591	0.03171	0.98469	1.29729	1.4059	1.49234	0.59026	0.72567	0.60643	0.27174	0.50876	1.50309	1.03408	1.1418	1.80106	2.02207	2.14162	1.60106	1.23104	2.26944	1.63878
ENSMUSG00000070565	1.69989	1.40132	1.48523	1.66982	1.70793	1.7979	1.34202	1.15308	0.87424	1.79857	0.89605	0.87601	1.37818	1.70611	1.68307	1.29433	0.882	1.37969	1.08216	1.2866	1.61435	1.4146	1.20536	0.83349	1.00662	1.34471	1.29587	1.1124
ENSMUSG00000070544	1.88828	1.98773	2.02387	2.01364	1.69248	1.60639	1.67301	1.60553	1.75204	1.99043	1.6558	1.52214	1.69301	1.84614	2.05693	1.90034	1.78703	1.71552	2.0463	1.76526	2.0329	1.76181	1.99598	1.88759	1.85307	1.83254	1.93912	1.84568
ENSMUSG00000070520	1.34984	1.29266	1.37016	1.24625	1.23621	1.25874	1.45444	1.40679	1.22118	1.48427	1.51345	1.44363	1.50708	1.25663	1.29896	1.50509	1.58076	1.52998	1.64872	1.50187	1.40953	1.34798	1.63935	1.54525	1.67569	1.55284	1.61049	1.62735
ENSMUSG00000070509	1.17877	1.26428	1.82886	1.43464	1.44441	1.64757	1.26428	1.05159	1.36871	0.98575	1.6463	1.72407	1.24481	0.83638	1.12077	-0.20708	0.74191	2.01101	1.25489	1.89135	0.96608	1.77556	1.92829	2.09725	1.86372	1.7564	2.16338	1.9484
ENSMUSG00000070469	1.51576	2.19657	1.70058	2.15301	1.24834	1.20482	1.30757	0.96975	0.10605	-1.68499	1.81871	1.75489	1.5159	0.53529	1.0466	1.24612	1.51139	-2.22487	2.12273	1.77015	1.22634	1.83772	1.63749	1.5037	1.65278	1.04168	1.57607	1.72552
ENSMUSG00000070462	1.84757	1.50944	1.76567	1.78585	1.42215	1.3888	1.23359	1.3143	1.50929	1.43481	1.3034	1.42118	1.51761	1.61064	1.66873	1.06913	1.24428	1.4955	1.35836	1.52708	1.41989	1.38563	1.17309	1.43773	1.48854	1.29195	1.19281	1.23104
ENSMUSG00000070436	3.4788	2.88392	3.22344	3.29966	3.15783	2.95329	3.16576	3.3073	3.6412	3.17917	3.30306	3.32459	3.38105	3.32983	3.29341	3.26975	3.32983	3.45881	3.12207	3.40317	3.65556	3.39455	3.16851	3.26527	3.35284	3.56103	3.22344	3.03628
ENSMUSG00000070427	-1.20595	0.75587	0.4892	0.58369	0.16722	0.74724	0.138	0.29341	0.35907	-0.28261	0.38946	0.17664	0.20062	-0.27314	-0.355	1.59974	1.7958	0.72517	1.56006	0.66975	0.16949	0.15811	0.42705	0.47235	0.46977	0.46562	0.43813	0.88807
ENSMUSG00000070426	1.64043	1.50723	1.47323	1.56256	1.48523	1.49957	1.62315	1.63512	1.79137	1.35148	1.49519	1.55041	1.62244	1.18705	1.1149	1.6432	1.58617	1.50929	1.51867	1.76213	1.48734	1.58586	1.58821	1.59767	1.72568	1.67643	1.47738	1.64666
ENSMUSG00000070394	1.51698	1.7171	1.82078	1.66964	1.08688	1.40724	1.62387	1.72765	1.28942	1.83678	1.89181	1.97616	1.89487	1.47294	1.44655	1.63056	1.94168	1.76661	1.47942	1.55652	1.62524	1.23835	1.41474	1.48451	1.45673	1.471	1.40064	1.69473
ENSMUSG00000070348	2.51	1.87826	2.06374	1.78703	1.78464	1.52033	1.42872	1.19754	1.64143	1.83241	2.49218	2.46468	2.5135	2.18416	2.20181	2.54597	2.30058	1.08688	2.89175	1.85026	1.3883	2.60067	2.46172	2.34006	2.69888	2.44584	2.62636	2.65231
ENSMUSG00000070327	1.86396	2.13183	1.53759	1.6398	1.30041	1.10514	2.84381	2.39855	0.91581	1.46462	2.13599	2.08481	2.11424	1.92308	2.29311	1.3266	1.15979	1.25854	1.77031	1.5772	1.72458	1.48957	1.36	1.04873	1.01751	0.96608	1.5678	1.212
ENSMUSG00000070319	2.22419	2.5488	2.51757	2.47521	2.4149	2.58077	2.58006	2.57646	2.76571	2.82203	2.51199	2.51846	2.50329	2.51	2.39947	2.29123	2.5192	2.45996	2.21825	2.28301	2.36941	2.46892	2.48471	2.50329	2.48471	2.55156	2.44189	2.46172
ENSMUSG00000070284	1.50645	1.73219	2.02146	1.97676	1.68497	1.59845	1.76492	1.87806	2.55399	1.39964	1.47942	1.53893	1.54337	1.70367	1.65097	1.47909	1.60092	1.6895	1.31944	1.58821	1.45497	1.50866	1.43021	1.51139	1.6457	1.97483	1.51774	1.51443
ENSMUSG00000070283	1.71041	1.98733	1.76312	1.89665	1.1423	1.46366	1.90886	1.89796	1.84004	1.20638	1.66648	1.60988	1.51295	1.5003	1.34598	1.4546	1.62256	1.28296	1.49167	1.52485	1.71023	1.65881	1.72104	1.86566	1.67846	1.73893	1.76409	1.72897
ENSMUSG00000070056	1.57978	0.84912	1.28643	1.1065	1.65388	1.34174	1.1337	1.09413	0.75732	0.7318	1.04895	1.17024	1.1055	1.24068	1.25181	1.33513	1.08914	1.29984	1.47114	1.94383	1.55759	1.31316	1.22514	1.31602	1.12917	1.2805	1.14379	1.10733
ENSMUSG00000070047	2.54597	2.77391	2.86371	3.22814	2.84172	2.69601	2.8082	2.81623	2.42414	2.41061	2.93478	2.75399	3.08444	2.65843	2.5962	2.96143	2.66527	2.90052	2.79301	2.83071	2.93478	3.14706	3.28801	3.08134	2.82362	2.85241	3.26062	2.85923
ENSMUSG00000070044	1.8309	1.05792	1.29178	1.18847	1.45325	1.42608	1.67506	1.76475	1.25467	1.61779	1.7174	1.6134	1.72104	1.36484	1.32691	1.75278	1.73893	1.67362	1.77134	1.28173	1.78464	1.8519	1.65472	1.53246	1.62286	1.48126	1.54525	1.97616
ENSMUSG00000070003	2.42774	1.68732	1.9524	1.83225	1.82332	2.05712	2.0114	1.89064	2.02064	2.04648	2.0293	2.08056	2.00733	2.19479	1.97808	1.41276	1.78743	2.0529	1.6156	1.76475	1.14952	1.35487	1.537	1.72272	1.41807	1.61959	1.48867	1.71974
ENSMUSG00000070002	1.50148	1.85205	1.59015	1.5103	1.63551	1.76674	1.90643	1.73582	1.38222	1.6684	1.60571	1.65815	1.72458	1.8499	1.92191	1.43143	1.56906	1.71785	1.61435	1.72085	1.74445	1.82164	1.83241	1.98998	1.87121	1.91761	1.9776	1.90264
ENSMUSG00000069920	1.46993	1.20409	0.81976	0.81446	0.08086	0.13938	1.5949	1.5522	1.48216	1.31264	1.8454	1.82164	1.84717	1.74699	1.69705	0.79325	0.99787	1.66456	0.78757	1.00905	0.81312	1.47363	0.99017	1.16188	1.48109	1.9211	0.07479	1.47959
ENSMUSG00000069910	0.69453	0.64529	1.86696	1.80117	0.89664	0.83199	0.34644	0.54121	0.96135	0.84633	1.1144	1.09918	0.93736	0.96377	0.71228	1.15689	1.17024	-0.03506	0.8789	0.85363	0.60434	1.28	0.37102	0.41203	1.38005	0.58519	0.39943	0.51231
ENSMUSG00000069895	1.42182	1.42793	1.2307	1.28751	1.48228	1.10733	1.35148	1.0964	0.76941	1.15776	1.2028	1.34544	1.61538	1.447	1.51259	1.31859	0.97847	1.18379	1.16662	1.00081	1.31206	1.51401	1.29516	1.10375	0.99652	1.03309	1.42675	1.07277
ENSMUSG00000069844	0.94479	1.44502	1.22977	1.02662	1.33193	1.34121	0.95179	1.02592	1.17144	1.23323	1.08559	1.05352	1.17309	0.97306	1.20501	1.42544	1.50084	1.12937	1.16244	1.08062	1.3301	1.27011	1.50173	1.49374	1.24263	1.24703	1.33457	1.33618
ENSMUSG00000069835	1.20726	1.33678	1.43242	1.30004	1.08588	1.26128	0.4551	-0.10829	1.33603	1.76935	1.82301	1.82945	1.80532	1.65131	1.72812	0.94315	1.06113	1.3034	0.50032	1.27045	1.28398	0.51956	0.87302	0.99209	1.05999	1.22711	0.81389	1.04723
ENSMUSG00000069833	3.65556	3.50064	3.31305	3.42857	3.35284	3.06066	3.19645	3.1113	3.06604	3.20697	3.40943	3.29341	3.10826	2.97511	3.08758	3.28347	3.13958	3.33924	3.65556	3.48813	3.20697	3.34633	3.58145	3.38105	3.15084	3.01847	3.50064	3.37322
ENSMUSG00000069808	1.43067	1.39373	0.89121	0.95013	1.47507	1.17144	0.57981	0.88476	1.25764	1.06913	1.09504	1.11878	1.13616	1.22556	1.33527	0.96894	1.04056	1.25011	1.39712	1.27734	1.18395	1.30771	1.15656	1.21313	1.1342	1.08434	1.15604	1.09125
ENSMUSG00000069744	2.06621	2.30563	2.37115	2.38201	2.28461	2.48345	2.14534	2.25951	2.621	2.28049	2.22419	2.22002	2.27493	2.16135	2.1106	2.0397	2.14684	2.4149	2.35568	2.39118	2.20984	2.20094	2.40909	2.40856	2.32587	2.20152	2.32321	2.14104
ENSMUSG00000069729	2.10753	1.97676	1.80208	1.83449	1.99618	1.86266	1.61904	1.71521	1.59343	1.90467	1.7569	1.67536	1.62443	1.73062	1.84519	1.95463	1.8499	1.90753	1.89407	1.62203	1.85026	1.73618	2.04955	1.96274	1.62855	1.66223	2.15769	1.86283
ENSMUSG00000069678	1.37337	1.09744	0.98405	1.06699	1.05666	1.19099	1.26663	1.19979	1.10629	1.10375	1.11878	1.20881	0.93135	0.95819	0.66729	0.99378	1.20811	1.16689	1.02502	1.26931	1.13656	0.93495	1.16143	1.15329	1.03684	1.04189	1.02985	1.1175
ENSMUSG00000069662	2.62949	2.00904	1.45343	1.77489	1.10749	1.39134	0.99892	1.25764	1.50099	2.01083	1.87272	1.8414	1.79776	2.17825	2.0854	1.37818	1.65307	1.55507	1.64666	2.15894	1.68272	1.6341	1.89049	1.94282	1.79951	1.48795	2.40068	2.19158
ENSMUSG00000069633	0.26026	0.78161	0.5684	0.51158	1.00453	1.26891	1.22653	1.42857	1.39118	1.18937	1.06997	1.20786	0.85735	1.09778	0.98676	0.80439	1.07142	1.25639	0.57658	1.06846	0.73008	1.18978	1.31158	1.44485	1.14363	1.50509	1.53803	1.03425
ENSMUSG00000069631	2.09649	1.76567	1.46736	1.59988	1.6301	1.61418	1.45828	1.3757	1.65357	1.53562	1.46839	1.49921	1.67736	1.62725	1.65131	1.75489	1.55593	1.51996	1.68416	1.72521	1.36964	1.60458	1.66873	1.77049	1.53927	1.57125	1.77338	1.59194
ENSMUSG00000069622	1.50607	1.12063	1.46184	1.43493	1.6895	1.73062	1.76036	1.9916	1.82444	1.77015	1.66093	1.62428	1.6684	1.41393	1.48053	1.54928	1.60878	1.96331	1.96255	2.0524	1.85614	1.72329	1.7214	1.65326	1.84614	1.741	1.65489	1.78796
ENSMUSG00000069565	1.79525	1.8191	2.151	2.11572	1.99901	2.05139	1.71471	1.68545	2.1439	2.25601	2.18345	2.1663	2.20884	2.2307	1.91178	1.96436	2.01704	2.14534	1.9992	2.14776	2.02146	2.09948	1.93706	1.94898	2.25434	2.11424	1.90341	1.99092
ENSMUSG00000069539	1.54896	1.54312	1.54943	1.64647	1.70592	1.53863	1.42608	1.39279	1.28785	1.58558	1.41129	1.35176	1.43702	1.49875	1.66124	1.62117	1.45793	1.45916	1.65996	1.36574	1.57666	1.69933	1.84412	1.72897	1.74874	1.57244	1.9197	1.63315
ENSMUSG00000069520	1.8438	1.01153	0.83445	0.9516	1.089	1.05431	1.76998	1.564	1.17431	1.23248	1.18282	1.12669	1.25581	1.04741	1.21171	1.4281	1.50478	1.42706	1.25087	0.94949	1.39817	1.29971	1.31847	1.24428	1.22916	1.23964	1.33226	1.44565
ENSMUSG00000069495	1.37274	1.41675	1.27407	1.32477	1.44873	1.34584	1.20448	0.94728	1.20933	1.35948	1.29085	1.21183	1.1661	1.25255	1.26064	1.45072	1.33427	1.39166	1.41407	1.28097	1.43159	1.31173	1.52661	1.38239	1.3952	1.32264	1.44873	1.33339
ENSMUSG00000069255	0.57605	1.1149	1.11812	1.12852	1.16224	1.07044	0.59378	0.11995	1.59699	0.65036	1.34299	1.38239	0.9532	0.02561	0.42198	1.15088	1.05767	0.58597	1.18187	1.0668	0.46614	-0.59299	0.57658	0.36789	0.67166	0.47836	0.51101	-0.01924
ENSMUSG00000069237	1.01368	0.93552	0.90192	0.91613	0.72478	0.92097	1.05954	0.89812	0.94394	0.84936	1.21363	1.16104	1.10514	0.74788	0.74053	1.42429	1.28195	1.15813	1.16143	1.37198	1.197	1.0976	1.16434	0.9844	1.05326	1.06887	1.18847	1.02806
ENSMUSG00000069171	1.39422	1.24068	1.60852	1.65599	2.06759	2.12508	1.76552	1.76689	1.27938	1.57846	1.29212	1.18798	1.52064	1.11897	1.22006	0.59531	0.79638	0.82195	1.39964	1.10819	1.0765	-0.436	0.65468	0.68983	0.40495	-0.51309	0.53214	0.73147
ENSMUSG00000069135	1.02838	1.28942	1.08914	0.8823	0.78451	0.65036	0.64483	0.25843	0.73971	1.24851	0.96744	0.85828	0.67331	0.9552	1.01604	1.14919	1.13616	0.90434	0.75101	0.49569	0.90054	0.50032	0.78339	0.59122	1.00648	0.70831	0.76828	0.89962
ENSMUSG00000069114	0.87601	1.18242	0.9437	1.12429	1.23539	1.16939	1.04741	0.9601	1.12669	0.95595	0.87198	0.82691	0.95875	0.84845	0.52835	1.0765	0.9702	0.55437	0.76266	0.86486	0.92259	1.13842	1.14779	1.05404	1.09894	1.0564	1.20119	1.15112
ENSMUSG00000069094	0.66649	0.93358	1.07961	0.91022	0.63005	0.57981	1.30663	1.05742	0.6929	0.83727	0.45582	0.44602	0.50806	0.2735	0.41303	0.31157	0.46977	0.51825	1.06653	0.65562	1.13961	1.05792	1.33282	1.20995	1.05431	1.4395	1.27323	1.26596
ENSMUSG00000069089	1.43256	1.53187	1.5148	1.47753	1.39103	1.55705	1.6959	1.49331	1.37656	1.59178	1.30193	1.23835	1.08454	1.20216	1.27775	1.34435	1.33938	1.70931	1.85107	1.72233	1.87027	1.78909	1.89796	1.83883	1.93392	1.92506	1.79304	2.01768
ENSMUSG00000069053	3.03628	3.05161	2.99162	3.01599	2.74351	2.70527	2.71751	2.67507	2.79968	2.93278	3.03628	3.08758	2.942	3.01599	2.98351	3.04163	3.02477	2.88132	2.90052	2.83785	2.88624	3.01355	2.99162	2.93991	2.86371	2.90052	2.91114	2.84923
ENSMUSG00000069049	2.17857	2.29692	2.42086	2.40289	2.24092	1.90697	2.08689	2.12012	1.9515	2.19056	2.21399	2.09196	1.98642	2.17204	2.2516	2.49359	2.51522	2.14133	1.83788	2.21315	2.38514	2.08929	1.95972	1.8309	2.14081	2.01847	1.96761	2.05712
ENSMUSG00000069044	2.1307	2.63519	2.35387	2.63751	2.34331	2.57817	2.2307	2.17557	1.87571	2.71139	2.63751	2.43562	2.65843	2.70369	2.91614	2.39445	2.25403	2.14014	1.93871	2.02387	2.17204	2.03696	1.97205	1.75504	1.87063	1.97329	1.9655	1.98537
ENSMUSG00000069020	1.28449	1.20448	1.33891	1.3774	0.88138	1.04147	1.28521	1.43021	1.61994	1.27832	1.38239	1.49628	1.41288	1.40064	1.18433	1.18705	1.20622	1.2676	0.89331	1.36558	1.18603	1.36519	1.23228	1.33836	1.19529	1.48593	1.1639	1.22042
ENSMUSG00000068966	0.79503	0.67068	0.04963	0.41997	0.37102	0.24717	0.8591	0.59877	0.40084	0.29209	0.38423	0.11811	0.40084	0.69785	0.84567	0.7767	0.68719	0.75322	0.18206	0.46028	0.55493	0.20062	0.58519	0.31406	0.09853	0.20309	0.50237	0.24717
ENSMUSG00000068923	0.96552	-0.26176	0.64735	0.3934	1.46496	1.19529	0.98165	1.03425	0.75386	0.78308	1.29178	1.34915	1.44485	1.36689	1.51345	1.50433	1.21401	0.87535	0.42114	1.28734	1.34435	1.10686	1.41585	1.41769	0.92859	0.64892	1.35595	0.75322
ENSMUSG00000068921	1.89235	1.82996	2.00904	1.94927	1.24445	1.32793	2.02234	1.8796	1.60031	1.60726	1.41972	1.38189	1.41725	1.63816	1.80842	1.91067	2.06621	1.83659	2.3376	2.1183	2.14495	2.17045	2.20959	2.2355	2.2426	2.15068	2.25951	2.24287
ENSMUSG00000068917	1.87227	1.52648	1.3915	1.44751	1.62402	1.54987	1.93614	1.7958	1.53228	1.7886	1.90179	1.76771	1.66593	1.637	1.47244	1.34966	1.72736	1.79951	1.92506	1.7114	1.70698	1.5208	1.66748	1.65248	1.70913	1.63298	1.71151	1.79496
ENSMUSG00000068882	2.00482	1.94107	2.22924	2.04796	1.98397	2.14721	1.81164	1.89576	1.84412	2.15997	1.88982	1.90516	1.92361	2.02573	1.91746	1.91874	1.73716	2.1281	2.07977	2.1848	2.1424	2.00612	2.19692	2.09619	2.22102	2.06114	2.10832	2.1183
ENSMUSG00000068856	2.08427	2.18639	2.27598	2.19832	2.0792	2.16589	2.06833	2.04268	2.29123	2.18552	2.1763	2.15473	2.19923	2.31844	2.30291	2.11508	2.18999	2.1326	2.1875	2.35346	2.13877	2.20758	2.39067	2.51846	2.29817	2.1779	2.38351	2.20758
ENSMUSG00000068823	2.53151	2.67151	2.61726	2.568	2.75709	2.68975	2.53961	2.49953	2.53009	2.66118	2.66319	2.49558	2.50208	2.52629	2.64058	2.82203	2.75259	2.47218	2.5907	2.50023	2.53151	2.42377	2.51995	2.35941	2.49501	2.40856	2.4167	2.44546
ENSMUSG00000068798	1.6684	1.63197	1.53047	1.55247	1.74315	1.80477	1.63461	1.66026	1.5522	1.84827	1.59144	1.54462	1.36109	1.59533	1.79304	1.89887	1.77489	1.8058	1.68713	1.73219	1.68467	1.43719	1.58434	1.50309	1.71003	1.68658	1.57178	1.61523
ENSMUSG00000068749	1.78585	2.00107	2.13214	2.05786	1.67588	1.78689	1.8839	1.83772	1.9776	1.98691	1.83953	1.79933	1.87121	1.76892	1.82669	1.86372	1.8338	1.99503	2.00526	2.04955	1.96168	1.90659	1.8519	1.81886	1.98862	1.89355	1.71394	1.98488
ENSMUSG00000068747	2.3268	1.61401	1.33739	1.6236	0.79346	0.92645	2.08371	1.98229	0.42433	1.4691	1.85458	1.82045	2.05166	1.32092	1.598	2.16097	1.81538	0.6055	0.36601	1.7828	0.01938	0.78605	1.47407	1.42098	0.48448	0.97411	1.58501	0.57658
ENSMUSG00000068744	-0.39975	0.10904	1.07507	0.963	0.52721	0.71424	1.43336	1.39166	0.77176	0.50731	0.93165	0.85363	0.82069	1.24874	0.68683	0.85546	0.90006	-0.18535	0.6008	0.27026	0.22053	0.99453	1.48496	1.67448	1.23875	0.63799	1.69989	1.05109
ENSMUSG00000068742	1.21551	1.04335	1.01175	1.02712	1.86164	1.7625	1.26148	1.37448	1.46129	1.64448	1.36176	1.59353	1.62713	1.28	1.3301	1.53549	1.36235	1.57962	1.50478	2.00462	1.45049	1.43882	1.40324	1.51047	1.27696	1.24248	1.43305	1.41129
ENSMUSG00000068739	2.41562	2.76571	2.5899	2.53891	2.56068	2.54281	2.6434	2.67749	3.03893	2.68504	2.66008	2.63977	2.73721	2.60886	2.45015	2.54531	2.70369	2.89384	2.43097	2.75139	2.78503	2.82539	2.72367	2.75259	2.78503	2.87897	2.6643	2.70369
ENSMUSG00000068732	1.15711	0.81446	0.69218	0.66604	0.7101	0.68012	0.78181	0.94394	0.83349	0.711	0.96634	0.90681	0.96787	0.66975	0.95734	0.68765	0.50941	1.16373	1.30041	1.07708	1.12317	0.84412	0.87451	0.91305	0.97144	1.1175	0.96872	1.07389
ENSMUSG00000068699	1.79982	3.14706	2.69355	2.8726	2.73721	2.62258	2.8726	3.12207	2.74351	2.83988	2.46112	2.58006	2.73296	2.8982	3.25219	3.40943	3.03893	3.18639	2.70017	2.50816	3.08758	2.73184	1.5037	1.6625	2.7587	2.25601	1.61174	2.46306
ENSMUSG00000068663	1.62373	1.37723	1.5205	1.46366	1.5667	1.30799	1.45708	1.4249	1.46636	1.86754	1.94791	1.95443	1.96512	1.82945	1.86713	1.8309	1.75586	1.53879	1.42076	1.44994	1.46551	1.64511	1.65404	1.65112	1.52607	1.61159	1.7723	1.5845
ENSMUSG00000068580	0.92859	1.0765	1.16516	1.0305	1.19162	1.36635	1.03219	1.24723	1.4902	1.40212	1.20119	1.3122	1.22395	1.16304	0.82014	1.30096	1.39279	1.2737	1.42957	1.48377	0.95679	1.17067	1.3645	1.43464	1.25795	1.37521	1.40104	1.5123
ENSMUSG00000068523	1.4126	1.48175	1.55094	1.58999	1.27984	1.84126	1.57244	1.71073	1.84348	1.40623	1.63878	1.61505	1.35472	1.37294	1.25911	1.84332	1.76475	1.95872	1.64597	1.47649	1.35563	1.68326	1.64489	1.70734	1.77606	1.87042	1.54809	1.71957
ENSMUSG00000068479	1.72781	1.81518	1.67328	1.65903	1.54896	1.56279	1.90195	1.80597	1.67796	1.76383	1.53605	1.46896	1.54795	1.40833	1.54573	1.80039	1.77572	1.47977	1.69615	1.61946	1.63197	1.44205	1.77858	1.69823	1.65147	1.55347	1.64286	1.76552
ENSMUSG00000068417	3.17631	0.99107	1.74658	1.61813	2.66756	2.62466	2.24225	1.83753	2.02039	2.28424	1.29708	1.27167	1.03109	1.23266	0.95133	1.98572	1.85743	2.36492	2.22887	1.87194	2.01124	2.46112	2.17469	2.11033	2.32111	2.55317	2.16168	2.43097
ENSMUSG00000068394	0.47836	0.46258	0.23277	0.3629	0.70482	0.75503	0.27455	0.21675	0.68471	0.26026	1.10529	0.99358	1.17518	0.63647	0.71697	0.58519	0.57843	0.55317	0.88617	1.02521	0.89664	0.66836	0.48515	0.50493	0.90622	0.58096	0.67258	0.39683
ENSMUSG00000068391	1.36531	0.82656	1.50659	1.31582	0.98856	1.07796	0.475	0.80383	1.1153	1.0113	0.76601	0.93708	0.44185	0.4425	-0.00662	0.87995	0.99604	1.05289	1.08775	1.19464	0.94836	1.19162	1.35577	1.51996	1.18466	1.27237	1.25581	1.16304
ENSMUSG00000068335	1.81246	1.77504	1.23771	1.08756	1.98842	2.1162	2.34076	2.21499	1.38507	1.57948	2.01235	1.99392	1.9316	1.76194	1.38927	1.88585	2.1554	1.75094	1.48399	1.71215	1.6981	2.09283	1.86656	1.96877	2.01525	2.12393	1.71614	2.03925
ENSMUSG00000068329	1.48496	1.54928	1.61682	1.57579	1.51698	1.60018	1.64143	1.45426	1.38387	1.53879	1.7637	1.7381	1.70478	1.69422	1.56531	1.90943	2.05139	1.40853	1.66266	1.5983	1.61717	1.60814	1.59353	1.66168	1.68689	1.75768	1.43654	1.58352
ENSMUSG00000068328	2.29507	2.06344	2.23842	2.16338	2.35426	2.43826	2.38025	2.3792	2.57068	2.39316	2.46468	2.49218	2.50091	2.49819	2.26418	2.14162	2.29261	2.36941	2.34994	2.43038	2.23323	2.25867	2.40961	2.55156	2.29766	2.33718	2.37808	2.33925
ENSMUSG00000068290	2.08617	1.76263	1.88515	1.7569	1.71563	1.78522	1.90467	2.01364	2.04312	1.82444	1.44602	1.44485	1.46462	1.73497	1.54107	1.86396	1.95833	2.14684	2.11741	1.96936	2.13778	2.05609	2.14335	2.11165	2.07001	2.17405	2.16223	2.12573
ENSMUSG00000068284	0.7245	1.14033	0.03573	0.95441	0.7318	0.46104	0.711	0.79818	0.75618	0.54042	0.19486	-0.12015	0.55083	0.5055	0.56094	1.38683	1.04873	0.44781	0.69866	0.24717	0.80098	0.95649	0.7644	0.52283	0.215	0.82232	0.98923	0.55266
ENSMUSG00000068267	2.5135	2.58397	2.59429	2.46963	2.44146	2.5135	2.34006	2.43943	2.29817	2.12239	2.12717	2.23102	2.17469	2.36646	2.23159	2.07793	2.06971	2.67151	2.59972	2.67016	2.34277	2.50329	2.71139	2.8289	2.56068	2.48268	2.63288	2.54198
ENSMUSG00000068264	0.96676	0.68101	0.78757	0.28328	1.01412	1.11208	1.02095	1.2912	1.28901	0.73705	0.96816	1.08325	1.02643	0.87995	0.61614	0.7101	1.06699	0.6337	0.42288	0.90844	0.76266	0.9702	0.9299	1.17327	0.85702	1.08633	1.0763	0.86815
ENSMUSG00000068250	0.64305	0.72748	0.97338	0.76748	0.46198	0.75322	1.95519	1.68114	1.10909	0.66166	1.20179	1.15378	1.02924	1.13942	1.11812	0.92259	0.69218	0.65326	0.83376	1.57948	0.26899	1.19099	1.36558	1.29486	1.21171	1.5067	1.36293	1.37586
ENSMUSG00000068220	3.37322	3.36558	3.08134	3.29341	3.26975	3.38829	2.99997	3.00784	3.80046	3.30306	3.35284	3.34633	3.31916	3.39455	3.22814	3.30306	3.37322	3.35946	3.13198	3.22344	3.25219	3.26527	3.03628	3.08758	3.18272	2.82362	2.85093	2.90706
ENSMUSG00000068196	2.13288	2.12363	0.82311	0.58146	2.87897	2.89175	1.9772	2.00825	2.3194	1.5897	2.36215	2.25214	2.71291	2.55399	2.96964	2.96964	2.71488	2.06971	2.36215	2.34693	1.28923	1.7236	1.94878	1.83753	1.57125	0.97576	1.35893	2.54112
ENSMUSG00000068184	0.55266	1.22872	1.37227	1.25835	0.64434	0.95701	1.34358	1.6283	0.86267	1.02304	0.86299	0.87229	0.96894	1.15936	1.02712	1.26705	1.29587	1.4336	1.31316	1.13333	0.55603	1.19881	1.23875	1.3339	1.38375	1.49519	1.09201	1.50973
ENSMUSG00000068115	0.5514	1.68479	1.29099	1.20216	0.50237	0.71464	1.15524	1.13076	0.81814	0.95624	0.70482	0.57563	0.88617	1.07341	1.21932	0.95297	1.04479	0.9928	2.18416	0.74236	1.28469	1.04312	1.4844	1.46064	1.15813	1.11401	1.48287	1.43669
ENSMUSG00000068114	1.13139	1.30358	1.15958	0.95297	0.8823	0.90192	1.3883	1.47261	1.11573	1.12049	0.92153	1.03065	1.00703	0.92429	0.8853	0.75128	0.8513	0.82037	0.97847	1.00203	0.6929	0.50673	0.29069	0.09615	0.36903	0.27576	0.36983	-0.03166
ENSMUSG00000068101	0.83876	0.58597	1.34686	1.14547	0.5772	0.94836	0.5684	0.32971	0.69947	0.17811	-0.05883	0.45643	0.48582	0.9516	-0.10829	1.26444	1.18187	0.55932	0.67924	0.90941	0.54042	1.57125	0.37236	0.71926	1.74114	0.97197	0.50394	0.36789
ENSMUSG00000068040	2.11547	1.90643	1.96026	1.96274	2.18022	2.03481	2.15508	2.16718	2.07814	1.96057	2.22859	2.23445	2.30204	2.12785	2.23674	1.95424	1.93706	2.23842	1.8839	2.07706	2.22335	2.22239	2.05115	2.05309	2.15769	2.25726	2.16251	2.08242
ENSMUSG00000068039	2.38773	2.4474	2.39216	2.32527	2.48985	2.43224	2.4805	2.53099	2.46963	2.4348	2.20251	2.09241	2.31264	2.33616	2.47591	2.49623	2.43418	2.40765	2.52284	2.54452	2.34121	2.53151	2.7026	2.57727	2.73184	2.49501	2.45169	2.53151
ENSMUSG00000068036	1.71614	2.07733	1.92308	1.87001	2.05218	1.86754	2.01751	1.85458	1.50257	1.73854	1.98596	1.97738	2.12956	1.85384	1.92506	2.61387	2.24287	1.62524	1.65147	1.33439	1.82961	1.55687	1.86208	1.679	1.26253	0.84162	1.3068	1.52708
ENSMUSG00000068015	1.21988	1.06738	0.69367	0.76538	1.42061	1.25272	1.11828	1.06205	0.8789	1.21589	1.08242	1.11208	1.23824	0.68471	1.02502	1.60404	1.41407	0.83696	1.20951	0.90368	0.47235	1.13693	1.16361	1.12867	0.85235	0.77719	0.87451	1.19201
ENSMUSG00000067995	1.39392	1.1462	1.11573	1.12523	1.54362	1.62203	1.08204	1.12336	1.37309	1.35968	1.0986	1.21638	1.15459	0.98575	1.05352	1.52648	1.4922	1.25425	1.57832	1.42957	1.47909	0.99017	1.10056	1.05377	1.13795	0.73106	0.99453	0.98036
ENSMUSG00000067878	1.08083	-0.33859	0.42288	0.35506	0.94496	0.77439	1.12645	0.98676	1.00173	1.42377	1.39912	1.35033	1.55457	1.38254	1.65424	1.59699	1.71166	1.00303	1.12695	0.64257	0.8853	0.67628	0.1429	-0.3019	1.04335	0.78488	-0.34763	1.07323
ENSMUSG00000067873	1.14413	1.75802	1.4138	1.31506	1.65307	1.66669	1.75127	1.8191	1.48915	2.27598	2.02126	1.88629	2.18639	1.80706	1.94107	1.91954	1.8315	1.76446	1.74861	1.65599	1.69213	1.50187	1.57638	1.52904	1.82114	1.61717	1.50237	1.78142
ENSMUSG00000067851	1.598	1.69956	1.6236	1.73908	1.59368	1.5007	1.72329	1.50509	1.2627	1.51515	1.26891	1.17945	1.48216	1.46551	1.57244	1.90964	1.71902	1.7767	1.7715	1.7097	2.00277	1.86986	1.93941	1.76526	1.89507	1.94717	1.92674	1.98147
ENSMUSG00000067847	1.7114	1.50386	1.63176	1.65082	1.57562	1.91339	1.703	1.80311	2.16746	2.04521	2.00006	2.05561	1.89978	1.80278	1.74538	1.84126	1.91954	2.10372	1.88874	2.02295	1.7348	1.71695	1.9916	2.05462	1.87878	1.85245	1.90717	1.87511
ENSMUSG00000067825	0.51825	1.05309	1.25612	1.20199	1.02768	0.90309	0.87302	0.93081	0.91674	1.00429	1.09182	1.27027	1.26514	0.95776	0.95624	0.94459	0.65326	0.38101	0.0215	0.84302	0.53143	0.58318	0.55025	0.65036	0.51703	0.74846	0.77955	0.64947
ENSMUSG00000067787	1.03484	0.90589	0.76114	0.74296	1.16304	1.22256	1.16104	1.18102	1.14547	1.09521	1.23433	1.30979	0.96692	1.00173	1.14952	1.14803	1.07406	1.09201	0.58467	1.24782	0.95394	0.60197	0.82142	0.85858	0.62041	0.8591	0.77308	0.68311
ENSMUSG00000067722	-0.78453	0.92747	1.15504	1.00769	0.83727	0.91761	0.71403	0.79161	1.212	1.33358	1.35237	1.50659	1.31875	1.53976	1.33968	1.00475	1.0026	0.98633	0.99552	1.30786	0.8611	0.99892	1.25489	1.27984	1.17164	1.22317	1.16898	0.95472
ENSMUSG00000067713	1.74445	1.88604	1.7625	1.78126	1.47261	1.56323	1.7259	1.7212	1.79885	1.65903	1.67493	1.61023	1.62256	1.65694	1.86676	1.67229	1.8095	2.04338	1.88924	1.84105	1.53201	1.7163	1.87928	1.81334	1.80859	1.72704	1.7686	1.83772
ENSMUSG00000067629	1.35148	1.0499	0.69714	0.68815	1.56485	1.50523	1.75835	1.66593	1.51212	1.5317	1.09583	1.06565	1.03027	0.78227	0.57396	1.21706	1.51902	1.65131	1.90341	1.76234	1.80337	1.61448	1.47114	1.5814	1.56854	1.73769	1.76567	1.70547
ENSMUSG00000067608	1.45514	1.54809	2.01828	1.94471	1.71837	1.85984	1.54506	1.55794	1.67958	1.69855	1.50279	1.35987	1.53622	1.92286	1.492	1.98691	1.94471	1.50401	1.81643	2.02806	1.65278	1.92947	1.74055	1.62536	2.38421	1.72032	1.63389	1.64715
ENSMUSG00000067567	0.76498	1.32733	1.37536	1.27167	0.79431	0.69367	0.9801	1.12811	0.8279	1.17834	1.3414	1.28643	1.34235	1.62991	1.65996	0.77042	1.08204	0.95179	1.07081	1.13461	0.71358	0.86084	1.06177	1.139	0.86732	0.98739	1.04414	1.11546
ENSMUSG00000067377	2.08371	1.1762	1.35968	1.32544	1.39796	1.64701	1.85061	1.86423	1.21033	1.77083	1.60814	1.58462	1.51122	1.37079	1.75297	1.59583	1.40549	1.58206	1.76705	2.0016	1.42148	1.25448	1.41288	1.37969	1.59781	1.6453	1.40655	1.41909
ENSMUSG00000067370	0.91447	0.82626	1.39574	1.06913	0.54453	1.1517	2.11932	2.17137	0.96845	-1.35988	0.07479	0.05298	-0.94045	-1.35988	-0.2966	1.06152	1.23248	1.40085	1.55992	1.98691	1.33859	0.97486	1.15755	1.31101	1.26809	1.27137	1.29864	1.22614
ENSMUSG00000067367	1.4416	1.3174	1.62855	1.49085	1.46379	1.47484	1.22436	1.29851	1.42031	1.49052	1.58762	1.51295	1.45038	1.38867	1.36558	1.37163	1.45694	0.98112	1.57049	1.51345	1.27856	1.12917	1.1517	1.11984	1.50449	1.16031	1.00965	1.16979
ENSMUSG00000067365	1.703	1.23451	1.39392	1.24874	0.95935	1.09125	1.15776	1.1517	1.38683	1.46534	1.58171	1.55298	1.50401	1.20638	1.00883	1.15435	1.31316	1.44859	1.45888	1.37969	1.32841	1.25181	1.29729	1.25425	1.40273	1.17476	1.26739	1.35935
ENSMUSG00000067336	1.16013	1.90772	1.3419	1.46094	0.96608	1.212	1.08976	1.48867	1.21692	1.67536	1.41656	1.29017	1.57802	1.53592	1.7569	1.54324	1.3456	1.48992	1.68071	2.13813	1.59935	1.50237	1.21346	0.87601	0.90006	1.14933	1.41276	1.10216
ENSMUSG00000067288	2.68219	2.81919	2.80653	2.7587	2.60265	2.8082	2.60689	2.69093	2.80969	0.93779	2.81623	2.79777	2.61612	2.4524	2.39908	2.48574	2.68078	2.93278	2.68751	2.90527	2.69601	2.90706	2.8726	2.99397	2.96366	3.1113	2.82539	2.86994
ENSMUSG00000067279	1.01003	1.11191	0.3361	0.80098	1.72704	1.50449	0.43675	0.76042	-0.17647	1.90923	1.89631	1.81383	1.83123	0.83225	1.51543	0.20204	0.33172	1.1388	1.31158	-0.1711	-0.33057	0.45047	0.19307	0.03747	-0.01654	0.36689	1.1418	0.2274
ENSMUSG00000067274	3.46717	3.40943	3.56103	3.54814	3.51406	3.58145	3.45881	3.51406	3.96166	3.6412	3.52461	3.41909	3.53565	3.50064	3.40317	3.54814	3.77763	3.80046	3.52461	3.58145	3.54814	3.68163	3.60379	3.60379	3.6412	3.80046	3.68163	3.58145
ENSMUSG00000067201	2.13183	1.37227	1.11059	1.08173	2.02168	1.84643	3.10214	2.93022	1.32241	1.08793	2.34429	2.3749	2.38564	1.9098	2.15275	-0.91298	-0.8376	-1.13074	0.97909	-0.355	1.21706	1.82978	1.74315	1.83576	1.88568	1.46145	1.84947	2.21977
ENSMUSG00000067150	2.09352	1.64472	1.73651	1.65472	2.27771	2.13371	2.3525	2.3194	2.31495	1.98165	1.72471	1.68071	1.89325	1.84452	1.99251	2.17382	2.08689	1.92308	1.8519	1.98165	2.04496	2.02295	1.83772	1.7679	1.94449	1.90017	1.98181	1.9256
ENSMUSG00000067148	1.4536	1.14952	1.40528	0.96894	1.49457	1.51171	1.5205	1.50401	1.57004	1.52201	1.18036	1.16547	1.10956	1.15587	1.23601	1.29851	1.50587	1.78198	1.49748	1.64597	1.41407	1.46447	1.6432	1.64061	1.55298	1.4657	1.47616	1.52936
ENSMUSG00000067071	1.48216	1.21726	1.63237	1.60003	0.70008	0.77924	0.97221	1.10239	1.19039	1.54651	1.49702	1.6639	1.54636	1.27438	1.00965	0.57763	0.70402	1.26996	1.5631	1.11221	1.40024	1.2596	1.27124	1.40736	1.1027	1.40528	1.22977	1.21692
ENSMUSG00000067038	3.35946	3.25569	3.45881	3.30306	3.14706	3.16576	2.98756	2.94654	3.21121	3.48813	3.12614	3.04163	3.14335	3.09289	3.09964	3.07217	3.15084	3.40943	3.24709	3.37322	3.09001	3.21523	3.17264	3.1113	3.26062	3.26527	3.14335	3.21921
ENSMUSG00000066979	1.77692	2.15424	2.44631	2.37059	1.64061	1.58342	1.72032	1.72014	1.76723	1.77323	1.83363	1.73388	1.72812	1.86786	1.74874	1.77401	1.80492	1.87511	1.78535	1.855	1.92246	1.95937	2.09196	2.05712	2.08056	1.98488	2.02344	1.90733
ENSMUSG00000066900	1.45156	1.06887	0.96692	0.92409	1.00551	0.79125	0.78533	0.48448	1.09022	1.31602	1.65472	1.64161	1.64123	1.6389	1.49085	1.23993	1.20933	1.91002	1.78828	1.70443	1.8315	1.83914	1.78842	1.87549	1.736	1.75489	1.76152	1.7526
ENSMUSG00000066894	0.9806	1.75521	1.33821	1.42248	0.88587	0.96744	0.90775	0.67487	0.66282	0.37697	0.86996	0.89185	0.79534	0.73106	-0.19706	0.50876	-0.06204	1.09666	1.26307	0.62566	0.99017	1.26093	1.1938	1.26723	1.07277	1.07982	1.35408	1.22179
ENSMUSG00000066892	1.40999	0.45582	0.53788	0.62329	1.48496	1.67301	1.09434	1.29864	1.5339	1.28195	1.44469	1.5418	1.5928	1.7087	1.64556	1.11331	1.31998	1.30554	1.27152	1.39437	1.28063	1.09125	1.25598	1.45743	1.30234	1.37095	1.17931	1.1944
ENSMUSG00000066878	1.57462	1.51073	2.34693	2.29052	2.19266	2.13747	1.72996	1.84487	2.02886	1.89475	1.71888	1.60686	1.89835	2.33369	2.1166	2.37623	2.26763	1.87593	2.02126	2.15733	1.81348	2.38564	1.7136	1.7446	2.49112	1.73497	1.53605	1.8438
ENSMUSG00000066877	1.57349	1.30513	1.7438	1.70119	1.4249	1.38699	1.54695	1.57666	1.37337	2.01681	1.98373	1.94655	1.67314	1.89204	1.6959	1.46993	1.45174	1.25104	1.3718	1.20569	1.07323	1.18061	1.46516	1.39485	1.33157	1.20021	1.44951	1.37407
ENSMUSG00000066842	2.20566	1.05545	1.22893	0.54342	1.81746	1.38239	1.81055	1.97831	0.36983	1.45174	1.19201	1.0839	1.29864	1.35968	1.2964	1.59084	1.37482	1.60389	2.09875	0.64847	0.90434	0.64639	0.91581	0.75503	0.21965	-0.03776	-0.01402	1.64684
ENSMUSG00000066839	1.41288	1.70102	1.83331	1.66669	1.89015	2.03141	1.91857	1.99482	2.21792	1.96936	1.79841	1.88309	1.97119	1.96591	1.81164	1.67813	1.82164	1.95424	1.80015	1.93577	2.0397	1.72104	1.98882	2.00904	1.72909	1.81995	1.9788	1.77323
ENSMUSG00000066800	-0.57351	0.85523	1.24329	1.59387	0.18206	-0.04906	1.33836	1.19603	0.63697	0.08983	1.30326	1.27924	1.30771	0.8311	1.07683	0.54892	0.27922	1.03752	0.30684	0.60246	0.69785	0.49527	0.90622	0.61991	0.53601	0.29069	0.5588	0.8217
ENSMUSG00000066798	0.17664	0.85266	0.49795	0.61793	0.81243	0.55218	0.62846	-0.3644	0.3361	0.35298	0.66935	0.60383	0.69367	0.33172	0.80832	0.8843	0.80226	0.58146	0.86635	0.5828	1.05289	0.96135	0.96787	0.94635	0.81631	0.96975	1.18123	1.02662
ENSMUSG00000066735	0.9736	1.00235	0.64597	0.51423	0.60246	0.35506	0.72618	0.47235	0.90622	1.10358	0.82883	0.87149	0.89853	0.66836	0.77596	0.73754	0.6227	1.00815	0.64397	0.977	1.02806	0.87396	0.59877	0.73454	0.83839	0.91339	0.65293	0.77596
ENSMUSG00000066724	2.20152	2.43607	2.62354	2.55673	1.94362	2.0792	2.25996	2.27164	2.51573	2.42774	2.52212	2.51995	2.43997	2.3775	2.29206	2.14721	2.28424	2.5108	2.23842	2.46675	2.45567	2.48345	2.50091	2.51433	2.57912	2.6317	2.45068	2.54742
ENSMUSG00000066721	-0.38153	0.36689	0.24232	0.24981	0.27026	0.1636	0.48064	0.73058	1.47572	0.46562	1.28431	1.44968	1.05077	0.66055	0.89962	0.29341	0.7179	0.63942	-0.20404	0.90485	1.56209	1.68782	1.18303	1.5123	1.30436	1.33754	0.9523	1.36484
ENSMUSG00000066705	0.24541	1.69889	1.60899	1.79719	1.79749	2.10437	1.55284	1.41641	1.85355	1.56871	1.55924	1.75913	1.22277	1.54763	1.15917	1.67469	1.68307	-0.05191	1.38638	-0.23585	1.01536	1.36797	0.74296	0.73624	1.09583	1.23852	0.88376	1.41954
ENSMUSG00000066643	1.12468	1.35695	1.23486	1.44222	1.46516	1.46025	1.50587	1.48837	1.34832	0.8843	0.94348	0.92466	0.95819	1.03777	1.16662	1.43523	1.45575	1.56385	1.29745	1.68242	1.67105	1.30019	1.49167	1.48692	1.33955	1.34757	1.25026	1.58231
ENSMUSG00000066640	1.61283	1.21538	1.50017	1.36145	1.78089	1.49443	1.54619	1.53815	1.60553	1.38267	1.49034	1.69491	1.80762	1.63056	1.57579	1.40966	1.30436	1.23804	1.0395	1.31657	1.39694	1.50534	1.33723	1.38819	1.19881	1.33073	1.45817	1.27595
ENSMUSG00000066637	0.77266	0.67487	0.53977	0.48835	0.18032	0.54508	0.89401	0.72076	0.74615	0.85266	0.11811	0.13242	-0.00662	-0.06945	0.05532	0.26116	0.24541	1.14976	0.4489	0.67258	0.54573	0.44688	0.215	0.00689	0.86616	0.31157	0.20204	0.48835
ENSMUSG00000066632	2.48574	2.68402	2.6111	2.75709	2.959	2.97511	2.83508	2.95608	2.73184	2.77199	3.02477	2.83785	2.79191	2.64058	3.00314	2.73721	2.88916	2.71612	2.6254	2.74238	2.98502	3.07217	2.52547	2.43562	3.05726	2.92025	2.94497	2.85434
ENSMUSG00000066621	1.60419	1.50545	0.97847	1.29955	1.73045	1.73672	1.6134	1.6959	1.57638	1.95586	2.15473	2.25358	2.18237	1.7526	1.75708	1.62601	1.72859	1.87255	1.59211	1.49149	1.6328	1.36833	1.65174	1.6981	1.22223	1.54776	1.76618	1.48929
ENSMUSG00000066607	-0.06945	0.97144	1.1055	1.18937	0.84412	0.96112	-0.19114	0.07791	0.90651	0.60197	1.20082	1.28565	1.36274	1.62524	1.325	0.13431	0.07043	1.1263	1.34489	0.8618	1.48053	1.16939	1.0223	1.17834	1.24184	0.83905	0.73408	1.33102
ENSMUSG00000066595	0.46028	0.45178	0.4263	0.43181	0.80547	0.60246	0.64529	0.36601	0.82758	0.16253	-0.25669	-0.55705	-0.59299	-0.46599	-0.05883	0.86376	0.63306	0.83051	0.57605	0.16949	0.61219	-0.13028	0.08086	0.01706	-0.25669	0.1293	0.41014	0.08269
ENSMUSG00000066571	1.56121	1.83659	1.18518	1.42722	1.59246	1.40005	2.08452	1.88568	1.87287	1.53487	1.71578	1.63176	1.82148	1.83192	1.98308	2.08075	1.74114	1.55944	1.565	2.19122	1.85844	1.7087	1.83192	1.65003	1.53759	1.72445	1.81246	1.7452
ENSMUSG00000066568	2.03598	1.73085	1.61486	1.61761	1.98289	1.8	1.96611	1.855	1.86229	1.88309	1.75802	1.60074	1.77986	1.76526	1.7976	1.99811	1.95107	1.92246	1.83525	2.01235	1.90923	1.66763	1.82669	1.78179	1.78245	1.68634	1.78535	1.77633
ENSMUSG00000066551	2.49558	2.09167	2.70017	2.55744	2.38728	2.48836	2.26699	2.26572	2.21128	2.35826	2.21537	2.14459	2.07547	2.49686	2.28782	2.60886	2.64854	2.4658	2.59702	2.48704	2.48648	2.49623	2.60795	2.44584	2.73721	2.34806	2.47419	2.4474
ENSMUSG00000066456	0.89148	0.59487	1.56871	1.32357	1.34966	1.66575	1.34951	1.73045	1.56578	0.93459	1.68182	1.68674	1.86547	1.92866	2.11598	0.89257	0.9819	0.67487	0.83905	1.35916	1.32177	0.99763	1.32753	1.3505	1.24865	1.17637	1.0986	1.29942
ENSMUSG00000066441	1.2962	1.53549	1.66044	1.50449	1.35408	1.22949	1.17327	1.17965	1.38466	1.53442	1.37887	1.29195	1.34544	1.36221	1.40352	1.21128	1.10174	1.23323	1.35595	1.20344	1.30916	1.35033	0.99973	1.035	1.23738	1.10028	0.94517	1.18828
ENSMUSG00000066440	1.49519	1.93269	1.51108	1.6786	2.00526	1.71771	1.69536	1.5567	1.47407	1.65357	1.40148	1.44222	1.60535	1.56886	1.75947	1.88485	1.7254	1.61859	1.58003	1.56586	1.70611	1.70335	1.83626	1.80722	1.50574	1.58647	1.84882	1.55829
ENSMUSG00000066415	1.42776	0.9552	0.96326	1.1124	1.3947	1.18217	0.95013	1.04816	1.08173	0.96459	0.83839	0.64305	0.69983	0.6738	0.67924	1.16959	1.11689	1.1049	1.23323	1.00883	1.04803	1.07103	1.12755	1.12409	1.15227	1.04542	1.18997	1.10571
ENSMUSG00000066406	2.02909	2.30879	1.89306	2.04888	2.11811	1.91197	1.96992	1.60419	1.52878	1.88828	1.76086	1.66324	1.91502	1.86461	1.97616	2.41434	2.09069	1.38784	1.60057	1.71277	2.12479	1.80735	1.79434	1.49185	1.26234	1.53503	1.79496	1.6328
ENSMUSG00000066357	2.21604	2.10466	2.61193	2.51846	1.75863	1.83104	1.88891	1.93436	2.151	2.15565	2.27008	2.28539	2.34331	2.27375	2.4247	2.5926	2.49819	2.36403	2.93278	2.09766	2.22451	2.50909	2.60391	2.66008	2.29856	2.3956	2.62949	2.5236
ENSMUSG00000066324	1.1881	1.17552	1.12268	1.18379	1.56578	1.50775	1.61461	1.78164	1.96512	1.41057	1.24553	1.18542	1.49423	1.29266	1.47696	1.63731	1.65191	1.74114	1.9666	2.06015	1.56265	1.53018	1.41675	1.2915	1.48808	1.55924	1.48692	1.59878
ENSMUSG00000066306	2.87665	2.60947	2.7587	2.74057	2.85241	2.74821	2.98351	2.83988	2.78241	2.37573	2.66228	2.66228	2.50909	2.62017	2.51656	2.86371	2.90706	2.61502	2.58651	2.57568	2.44584	2.63751	2.93278	2.83071	2.63654	2.61502	2.90052	2.71612
ENSMUSG00000066278	1.58324	1.19563	1.80967	1.80092	1.41895	1.52368	1.30491	1.33043	1.53562	1.40816	1.40509	1.53283	1.53656	1.64123	1.52485	1.68802	1.60785	1.07852	1.56933	1.7976	1.7114	1.3993	1.55132	1.75552	1.51947	1.56796	1.50882	1.43285
ENSMUSG00000066235	1.40708	1.45549	1.74315	1.74217	1.03684	1.20916	1.58276	1.65023	1.84977	1.42692	1.2026	1.30592	1.21313	1.4878	1.38563	0.89793	1.14251	1.51139	1.62601	1.28239	1.35117	1.54662	1.74928	1.92324	1.48675	1.75313	1.81296	1.70765
ENSMUSG00000066233	0.90028	1.19395	0.29782	0.54255	0.53665	0.84385	1.21551	1.30947	1.14194	1.15019	1.55719	1.58018	1.41446	1.56323	1.38207	0.77266	1.04147	1.20726	1.13209	0.61738	0.6094	0.81938	0.83727	0.8811	0.821	1.31817	0.93856	1.11384
ENSMUSG00000066232	2.15243	2.22887	2.27827	2.27276	2.13235	1.89527	1.91536	1.93941	1.83123	2.17428	1.91804	1.80782	2.02459	2.15068	2.23485	2.70781	2.34607	2.00692	1.8916	2.05609	2.05115	2.07654	1.94542	1.82095	2.05389	1.9524	1.87042	1.86826
ENSMUSG00000066191	1.07103	1.20622	1.36092	1.20462	0.87362	0.8501	1.32322	1.32809	1.24127	1.33754	1.43654	1.50084	1.11034	1.19923	1.01803	1.23288	1.2446	0.77836	1.25581	0.70598	1.04096	1.21826	1.07982	1.29984	1.04401	1.01228	1.30834	1.21363
ENSMUSG00000066152	0.82721	0.56486	0.57919	0.59265	1.04292	1.06803	0.99133	1.16211	0.68683	0.71514	1.34984	1.40736	1.29299	0.67586	0.61406	0.42114	0.45297	0.53426	1.44265	0.778	0.81099	0.69453	0.45779	0.46198	0.475	0.3934	0.42705	0.5514
ENSMUSG00000066151	2.12448	2.00733	1.68226	1.7206	2.03141	1.94655	2.09746	2.00183	1.78393	1.84794	1.79917	1.74874	1.90264	1.84794	2.0278	1.96936	1.87255	2.02886	2.08314	2.00092	2.03553	2.04422	2.06482	1.98514	1.97923	2.01681	2.13214	2.24225
ENSMUSG00000066150	1.11282	1.10819	0.9267	0.77596	0.58236	0.28476	0.96088	0.90078	1.04096	0.59695	0.69614	0.79197	0.92776	0.51505	0.70008	0.86869	0.711	1.14569	0.86427	0.95956	1.03777	0.88587	0.83839	0.85425	0.75101	1.00648	0.81516	0.76632
ENSMUSG00000066149	0.63449	1.13311	1.05572	0.80624	0.61991	0.93358	0.66166	0.79678	0.89758	1.0497	1.0581	1.16859	0.64991	0.90622	0.83349	0.90589	0.99305	1.27832	1.27027	1.03927	1.07796	0.72293	0.89293	0.86847	0.99732	1.1153	0.95701	1.00407
ENSMUSG00000066148	1.01683	1.23539	1.29587	1.2569	1.4059	1.28225	1.08876	1.30592	1.37723	0.9525	1.04592	1.07277	1.19216	1.19395	1.25781	1.53771	1.4059	1.32443	1.34358	1.33584	0.93528	1.17407	1.25293	1.26976	1.32264	1.07683	1.31675	1.09521
ENSMUSG00000066113	2.01768	2.47683	2.45383	2.64983	1.64268	1.27502	2.04338	2.03004	1.13922	1.92843	2.48345	2.52732	2.39118	1.91442	1.47707	0.4996	0.61052	2.32411	0.40244	1.00687	0.8327	0.98739	-0.48696	-0.85647	1.54588	1.88678	0.26899	1.61668
ENSMUSG00000066043	1.56472	1.46475	1.5143	1.43821	1.44455	1.24894	1.58032	1.48765	1.0922	1.07341	1.23875	1.15587	1.40366	1.54208	1.63816	1.90604	1.71521	1.05159	1.3293	1.29909	1.48318	1.48496	1.44287	1.42412	1.29449	1.31787	1.42001	1.28159
ENSMUSG00000066042	1.11384	0.83839	0.79918	0.84845	0.8279	0.92719	1.47065	1.45761	0.77005	0.9179	0.55317	0.65562	0.45047	0.59265	0.81814	0.77762	0.9149	0.72334	0.9525	0.81062	0.71882	0.48714	0.81591	0.75164	0.90192	0.61162	0.77481	0.71697
ENSMUSG00000066037	1.9102	2.03055	2.04796	2.06396	2.04974	2.00069	1.92695	1.86054	1.87536	1.913	1.85664	1.65996	1.80823	1.87084	1.88119	2.1919	2.1298	1.69268	1.83969	1.89921	1.94168	1.9182	2.10129	2.01871	2.0367	1.95972	2.05115	2.02276
ENSMUSG00000066036	2.70781	2.76435	2.46511	2.59324	2.78503	2.6284	2.64689	2.50023	2.40588	2.60689	2.71921	2.69093	2.74821	2.54942	2.70369	2.66228	2.49218	2.64983	2.73597	2.73441	2.61612	2.70128	2.75399	2.55992	2.49953	2.55088	2.69223	2.60265
ENSMUSG00000066026	2.27959	1.95872	1.62472	1.13512	1.33138	1.86072	1.99696	2.11106	1.95608	0.79678	1.43939	1.49309	1.4632	1.73516	1.61321	0.42878	0.41203	1.17945	2.09121	1.86031	0.99701	2.12422	2.22818	2.27129	1.96977	2.5363	2.17761	2.46468
ENSMUSG00000065990	1.52998	1.73182	2.10627	1.92737	1.66305	1.78301	1.65307	1.73769	2.09495	2.40909	2.21675	2.25951	2.21792	2.09047	1.8796	1.73534	1.93095	2.05406	2.06176	2.02039	2.1298	2.15679	2.10027	2.06153	2.19832	2.1663	2.04138	2.27631
ENSMUSG00000065979	1.31039	1.05618	1.51726	1.38507	0.90337	0.91674	0.79638	0.88982	0.75663	0.80226	1.18415	1.24952	1.22436	1.70765	1.57752	1.2953	1.36074	1.38432	1.43579	0.93431	0.83764	0.68849	1.07187	0.92333	0.47706	0.69418	1.04835	0.45779
ENSMUSG00000065954	2.23378	1.48692	0.76352	1.08454	2.39736	2.21537	1.68577	1.46809	1.41989	1.56432	1.72329	1.57085	1.70734	1.86929	1.85614	1.86283	1.32637	1.27924	1.38173	1.29729	1.86986	1.84018	1.70645	1.58018	1.34489	1.58544	1.88442	1.4087
ENSMUSG00000064317	1.65023	1.53152	1.79525	1.6918	1.53201	1.76705	1.24228	1.4827	1.74041	1.54525	1.49246	1.56918	1.23338	1.51671	1.23338	1.4089	1.50201	1.50115	1.61914	1.62149	1.53487	1.51108	1.82017	1.94542	1.67047	1.72407	1.6262	1.64857
ENSMUSG00000064308	2.00348	2.93022	2.73184	2.92025	1.90416	2.34607	2.65936	2.4474	1.9788	2.20181	2.45169	2.4263	2.04843	1.26064	1.53863	2.04111	2.02039	2.40289	2.37311	2.68504	2.60588	1.75144	1.39118	1.49829	1.90624	-0.27314	1.61004	2.1554
ENSMUSG00000064307	1.06523	0.57763	0.8667	0.78127	0.75839	0.84697	0.6309	0.70049	0.29341	0.25298	0.48988	0.58184	0.20309	0.35395	-0.33057	0.11292	0.59531	0.69074	0.1293	0.15928	0.83667	0.74724	0.61738	0.68101	0.6055	0.79239	0.43092	0.55083
ENSMUSG00000064302	1.6067	1.85681	1.80876	1.88058	1.92308	1.55992	1.80782	1.48854	1.24301	1.63197	1.38069	1.35745	1.42957	2.01971	2.38201	1.96863	1.59682	1.5748	1.77792	1.85384	1.86423	1.8499	1.87027	1.77954	1.52708	1.86637	1.93392	1.64161
ENSMUSG00000064289	1.28603	1.23473	0.98739	0.96918	1.33618	1.32914	1.36746	1.44565	1.0581	1.32618	1.10447	1.1944	1.08474	1.44937	1.35807	1.22634	1.3246	1.45387	1.19508	1.33409	1.75947	1.6721	1.65307	1.57752	1.73207	1.60743	1.41972	2.08481
ENSMUSG00000064284	1.22006	0.36106	1.07323	1.20933	0.97283	1.18518	1.27938	1.36915	1.35162	1.45888	0.87498	1.09894	0.76601	0.70754	0.33977	0.45178	0.75193	0.42782	0.23614	0.94421	0.26766	0.15928	0.59487	0.7723	-0.48696	0.55317	0.47322	0.35804
ENSMUSG00000064264	1.00769	1.34202	1.68647	1.55507	1.59093	1.77259	1.54879	1.7097	1.78601	1.49167	1.46161	1.58726	1.37903	1.65489	1.54362	1.23601	1.52549	1.37274	1.15088	1.29085	1.35612	0.86456	1.37758	1.52485	1.06738	1.33739	1.29449	1.06341
ENSMUSG00000064254	1.49846	1.30133	1.14636	1.28643	1.83396	1.82595	1.85073	2.08481	2.34164	1.67493	1.73182	1.81108	1.65278	1.45828	1.42544	1.63487	1.76194	1.97461	2.20854	1.76279	2.02635	1.69473	1.7025	1.86676	1.52387	1.74995	1.67918	1.69018
ENSMUSG00000064215	0.92153	0.75386	-1.06296	-0.57351	0.72139	1.03684	2.47419	2.21093	-0.24305	0.72107	1.61401	1.61798	1.36205	1.49423	1.43788	0.75663	1.11164	1.36635	1.0765	0.74878	1.14251	1.19679	1.02304	1.22436	-0.78453	0.45047	0.18032	0.74575
ENSMUSG00000064210	1.79013	2.02635	1.74114	1.94514	2.45169	2.09097	1.55057	1.36352	1.86637	1.52549	1.66026	1.57948	1.85784	1.85458	1.92695	2.20181	1.75674	2.1293	1.8315	1.73769	1.77812	1.85263	1.89869	1.7084	1.62256	1.52201	1.90126	1.69064
ENSMUSG00000064181	0.65663	0.64639	0.98923	0.64991	0.75164	0.94496	0.06637	0.64892	0.49569	0.96816	1.07578	0.96999	1.19242	0.90054	1.37858	1.33563	1.30266	0.92333	1.42574	1.26357	1.1055	0.95275	1.3888	1.45227	1.04147	1.30298	1.3955	1.13021
ENSMUSG00000064145	1.8732	1.98397	1.94383	1.90195	1.64011	1.66483	1.5522	1.61186	1.72032	1.76587	1.51178	1.43683	1.62272	1.5714	1.61122	1.85723	1.80689	1.63935	1.68895	1.67105	1.92074	1.81258	1.91522	1.86396	1.85984	1.84313	1.87243	1.90054
ENSMUSG00000064138	1.46161	1.39392	1.18898	1.34935	1.31907	1.1151	1.052	1.02447	0.96872	0.83638	0.87932	0.71318	0.90523	0.74096	0.93251	0.99604	0.86402	1.41909	1.3685	1.23924	1.36221	1.76923	1.53069	1.56279	1.7473	1.65459	1.61577	1.74087
ENSMUSG00000064128	0.87476	0.635	1.13656	1.14486	1.16824	1.23486	1.18379	1.05051	0.7678	1.01412	0.6094	0.60434	0.52283	0.91842	0.44185	0.51101	0.78533	0.79094	1.13842	0.57563	0.59766	0.72334	0.66888	0.69947	1.08534	0.53601	0.65326	0.75663
ENSMUSG00000064127	1.73254	1.68513	1.5772	1.72704	1.73792	1.68379	1.70931	1.48957	1.52033	1.5772	1.5779	1.5347	1.59974	1.55976	1.76984	1.60977	1.44485	1.1043	1.4194	1.77586	1.82457	1.86826	1.85545	1.72219	1.84367	1.97432	1.83816	1.84058
ENSMUSG00000064120	1.62176	1.59569	1.19563	1.37704	1.91804	1.91939	1.3899	1.22789	1.58261	1.22693	1.40132	1.45212	1.38819	1.62872	1.59668	1.18242	1.08667	1.89253	1.52936	1.11164	1.7097	1.7056	1.6463	1.71537	1.60202	1.59668	1.81124	1.81503
ENSMUSG00000064105	1.56485	1.20569	1.86015	2.28049	2.20884	2.21049	2.77831	2.73296	2.13183	1.51197	1.43143	1.45761	1.68211	1.51259	1.863	2.03443	1.69876	1.58558	1.30513	0.92259	1.60508	1.06615	0.95419	1.1639	1.12937	1.18018	1.31243	1.17289
ENSMUSG00000064090	0.93708	1.28063	1.41895	1.42643	1.32675	1.42316	1.61813	1.58171	1.18847	1.40415	1.1966	1.08534	1.23515	1.3899	1.25043	1.20638	1.13594	0.9212	1.45857	1.25219	1.24691	1.45049	1.5996	1.54362	1.67523	1.5279	1.46769	1.31378
ENSMUSG00000064080	2.60795	3.26527	2.84172	2.93478	1.61228	1.7905	2.34242	2.47929	2.30997	2.8726	1.97786	2.06562	1.88982	2.9032	2.56322	3.14335	3.17917	3.31305	2.46306	3.74431	3.41909	0.8823	0.3979	0.59954	2.2768	1.20786	0.90817	2.29012
ENSMUSG00000064068	1.69688	1.87725	2.11857	1.9937	1.69405	1.76823	1.90547	1.93802	2.04796	1.71552	1.81575	1.83225	1.87666	1.70478	1.61647	1.96132	1.99696	1.74589	1.71023	2.0298	1.95186	2.12717	2.13532	2.25214	2.19923	2.14534	2.15733	2.10129
ENSMUSG00000064063	1.94752	1.88013	2.18265	2.18778	2.02207	2.25214	1.94927	1.97249	2.35899	2.06396	2.29954	2.32321	2.1763	2.06114	2.03899	1.8939	2.01257	2.27493	2.15565	2.25753	2.09196	2.13183	1.97831	1.9992	2.29507	2.19995	1.86087	1.96693
ENSMUSG00000064061	1.07366	1.26026	1.14153	1.10083	1.37586	1.34832	1.68907	1.56545	1.30234	1.28521	1.42329	1.35117	1.52565	1.37838	1.40075	1.0564	1.19923	1.06177	1.1923	0.72567	0.85295	0.81035	0.49694	0.42198	0.79024	0.94127	0.83696	0.93303
ENSMUSG00000064037	1.65375	1.29466	1.23621	1.15435	1.23204	1.33787	1.63267	1.57704	1.57832	1.00769	1.34706	1.30436	1.40339	1.26397	1.41844	1.68132	1.53687	1.52403	1.49246	1.13634	1.40229	1.54651	1.67448	1.6322	1.5738	1.58248	1.55759	1.52228
ENSMUSG00000064030	1.613	1.13152	1.28449	1.24281	0.62566	0.86732	1.18102	1.34832	1.22575	1.43719	1.30513	1.44469	1.49829	1.39754	1.4132	1.02712	1.32303	1.44764	1.48627	1.32528	1.31113	1.45097	1.36293	1.51401	1.42392	1.46184	1.32163	1.35312
ENSMUSG00000063952	1.28333	1.49085	1.21726	1.30847	1.83123	1.75031	1.60321	1.44408	1.21256	1.61981	1.23397	1.3299	1.34966	1.51883	1.54406	1.34324	1.27237	1.54573	1.57627	1.51377	1.53047	1.45673	1.40005	1.41222	1.52949	1.47909	1.60122	1.41675
ENSMUSG00000063931	2.00977	1.93247	1.84925	1.90566	1.76014	1.76297	1.90179	1.97616	1.79209	2.27008	1.93048	1.9197	1.88941	2.13532	2.11688	1.89855	1.92524	1.62656	1.85901	1.84864	1.73098	1.77922	1.904	1.91373	1.76014	1.73011	1.87001	1.84977
ENSMUSG00000063904	2.2867	2.32411	2.53961	2.4658	2.32016	2.20181	1.99482	2.19548	2.03027	2.31592	1.91339	1.99937	2.25515	2.32898	2.15068	2.16251	2.09702	2.32181	2.139	2.34775	2.23102	2.32559	2.21276	2.2614	2.24122	2.37311	2.19548	2.18237
ENSMUSG00000063897	1.41545	1.84004	1.87001	1.78427	2.18511	2.38201	1.46925	1.37818	0.8067	1.63797	1.57366	1.71121	1.71394	1.61435	1.42957	1.6283	1.74575	1.9937	1.14547	1.54525	1.51242	1.82273	1.91615	2.18552	2.19342	2.0944	1.93636	1.98266
ENSMUSG00000063895	1.13512	1.49907	1.37468	1.3301	1.24228	0.91083	1.03667	1.07142	1.13042	1.26064	1.26778	1.10147	1.40148	1.28159	1.26009	1.52297	1.33122	1.12485	1.1049	1.44578	1.31243	1.48126	1.35487	1.17345	1.61829	1.30592	1.25911	1.3068
ENSMUSG00000063889	0.83472	0.05532	0.04776	0.15811	0.71611	0.51583	0.94861	0.71926	0.11811	0.23614	0.71882	0.67876	0.61294	0.29554	0.77762	0.11811	0.38601	0.84672	0.17664	0.51342	0.52283	0.44106	0.79431	0.81389	0.58184	0.83801	0.71611	0.85988
ENSMUSG00000063888	1.92947	1.79434	1.90264	1.82546	1.86872	1.90143	1.87806	1.95365	1.68356	1.7171	1.7934	1.7264	1.86948	1.75851	1.86696	1.99303	2.06783	1.92695	1.91133	1.77941	1.68941	1.75031	1.76552	1.6976	1.76409	1.98067	1.7934	1.68071
ENSMUSG00000063884	1.61616	1.75851	1.87725	1.7828	1.42757	1.32514	1.64253	1.43753	1.47065	2.07108	2.1281	2.08689	2.13813	1.87172	1.81886	1.66465	1.67888	1.572	1.93095	1.81709	1.65749	1.56228	1.72014	1.61761	1.76167	1.58324	1.66724	1.644
ENSMUSG00000063882	1.87255	1.7752	2.07221	1.99876	1.75402	2.07998	1.74507	1.88531	2.04034	2.30847	2.17246	2.13479	1.88461	1.89269	1.94717	2.06262	2.33229	2.18416	1.9809	2.0881	1.88171	1.95872	2.14974	2.1298	2.21093	2.1689	2.06858	2.33333
ENSMUSG00000063873	1.21869	-0.05191	-0.38153	-0.03776	1.45842	1.39357	0.95365	1.61594	1.0395	-0.477	1.40241	1.40679	2.11972	1.66496	1.97143	0.6767	-0.05883	1.11597	1.60168	1.92653	2.02295	1.48978	1.67706	1.67796	1.41695	0.86402	1.49006	1.7087
ENSMUSG00000063849	1.18433	0.89962	1.00387	0.81555	0.67331	0.98469	0.70598	0.80467	1.09142	0.78017	1.05792	1.07708	1.12591	0.81591	0.88352	0.56324	0.47235	0.62096	1.02254	0.90775	0.77042	1.00965	0.82232	0.95275	0.79125	0.86024	0.89401	0.96787
ENSMUSG00000063838	-0.05191	1.32809	1.09778	0.85266	0.02561	0.0215	1.24018	1.24068	0.11624	1.82029	2.18639	2.22605	1.98753	1.87287	1.67958	0.80698	1.52297	2.00183	1.3554	1.2409	1.73286	1.05954	1.30407	1.5591	1.36414	1.50148	1.23539	1.44372
ENSMUSG00000063810	0.91871	1.3645	1.326	1.42163	1.24994	1.21149	1.54809	1.56946	1.25535	1.25874	1.05268	0.96459	0.97221	1.00203	1.14363	1.19979	1.32861	0.72369	0.84728	1.02378	0.78953	1.07232	1.09125	0.91419	1.21745	1.12063	0.90993	1.08307
ENSMUSG00000063808	1.23381	1.31889	1.17184	1.05685	1.21015	1.34422	1.11034	1.20895	1.24263	1.18542	1.07815	1.04592	1.07044	0.96692	1.10594	1.46387	1.54763	1.69079	1.13656	1.0802	1.26705	1.28942	1.46447	1.40797	1.29692	1.28369	1.4691	1.43833
ENSMUSG00000063802	1.64345	1.56136	1.83753	1.78635	1.72329	1.9182	1.41431	1.71441	2.01497	1.66483	1.72765	1.84159	1.64286	1.85205	1.67781	1.80967	1.92596	1.90213	1.74204	1.71537	1.85044	2.03899	2.09804	2.28424	2.09141	2.08716	2.05462	1.92771
ENSMUSG00000063801	1.58156	1.51401	1.63677	1.78164	0.81664	1.03876	1.46993	1.46551	1.86164	1.45964	1.25535	1.29909	1.2795	1.30326	1.13997	1.40116	1.34984	1.41713	1.04782	1.41725	1.15132	0.88894	1.13139	1.15057	1.08434	1.16048	1.01578	1.16824
ENSMUSG00000063800	1.52502	1.37079	1.37095	1.28333	1.44265	1.50478	1.47507	1.49875	1.33043	1.08412	0.95107	0.81732	0.99836	0.84728	0.9626	1.62814	1.59343	1.51849	1.27908	1.51093	1.39103	1.31378	1.52228	1.50412	1.48159	1.41954	1.39987	1.39743
ENSMUSG00000063787	1.43	1.44485	1.55944	1.44265	1.40981	1.65404	1.42942	1.55733	1.57311	1.08876	1.4253	1.45937	1.51947	1.40005	1.26663	1.70611	1.75988	1.52677	1.35222	1.18018	1.40767	1.44717	1.3952	1.49006	1.65219	1.49006	1.33723	1.34422
ENSMUSG00000063760	1.09819	1.4138	1.0802	1.03853	0.98341	0.88025	1.59264	1.58949	1.1661	0.83971	0.65126	0.62516	0.82014	0.89293	0.96816	1.09563	0.89009	1.06235	1.35627	1.10956	1.35745	1.31133	1.49503	1.48706	1.36092	1.33771	1.51279	1.25219
ENSMUSG00000063663	1.25781	1.1144	0.95649	1.14435	1.34935	1.41972	1.0188	0.91144	0.91177	0.99227	0.89905	0.88587	0.98856	0.96033	1.10239	1.40708	1.29516	0.82267	0.72478	0.9928	1.07465	1.13002	1.04615	0.75813	1.12867	1.09942	1.14869	0.95497
ENSMUSG00000063659	1.04351	1.34781	1.25197	1.3006	1.53137	1.40148	1.11164	1.21767	1.02052	1.25552	1.10375	0.91761	1.15755	1.31276	1.20951	0.64639	0.67487	1.09839	1.2039	1.1944	0.94348	0.81312	0.89506	0.74372	0.93459	0.55266	0.76601	0.8169
ENSMUSG00000063605	1.61448	1.54223	1.52936	1.53069	1.92695	1.82197	1.84058	1.91118	1.79705	2.12363	2.20536	2.21358	2.00107	1.85699	1.6566	1.58544	1.88408	2.26497	1.95972	1.99458	2.36403	1.89445	1.83859	1.88442	1.96008	2.08904	1.88719	1.91615
ENSMUSG00000063576	2.00592	2.05662	2.06858	2.17273	1.65918	1.77907	2.05979	2.05839	1.85173	1.91105	1.81553	1.86929	1.79885	1.89887	1.93706	1.98916	2.16467	2.25403	1.89221	2.09948	2.10129	2.05432	2.10466	2.17114	2.14932	2.23889	2.12146	2.03481
ENSMUSG00000063568	0.92383	-0.0721	-0.09572	0.04776	0.87995	0.9717	0.82586	0.95649	0.74575	0.81353	0.81732	0.91472	1.04292	1.23875	1.3955	1.13445	0.79678	0.13938	0.6767	0.6059	0.48448	0.98985	1.15736	1.1277	1.23835	1.18705	1.36205	0.94348
ENSMUSG00000063550	2.04796	1.67429	1.56472	1.76908	1.86354	1.61746	1.76475	1.53246	1.46111	1.64372	1.48302	1.47977	1.61049	1.5473	1.58261	2.19512	1.68479	1.65947	1.85784	1.93706	1.80514	1.85664	1.61829	1.47114	1.52368	1.43227	1.67105	1.36145
ENSMUSG00000063543	1.78427	1.60553	1.80747	1.70232	1.88652	2.13571	1.94025	2.02105	2.13214	1.83296	1.83788	1.82565	1.82095	1.83859	1.92653	1.79885	1.98328	1.84018	1.74298	1.80782	1.77098	1.96389	1.74134	1.87593	2.05561	1.82066	1.76512	1.89559
ENSMUSG00000063524	3.41909	3.68163	3.42857	3.70091	3.56103	3.74431	3.83383	3.83383	3.50064	3.41909	3.91458	4.08927	3.77763	3.28801	3.37322	3.53565	3.68163	3.36558	3.27866	3.44769	3.19645	3.35284	3.20322	3.2324	3.42857	3.23758	3.52461	3.04675
ENSMUSG00000063511	2.40588	2.31804	2.60947	2.52452	2.42207	2.52284	2.59324	2.56895	2.48766	2.43997	2.37163	2.31048	2.27453	2.3808	2.20597	2.36015	2.46172	2.50743	2.67933	2.47521	2.46675	2.3504	2.69888	2.59541	2.54942	2.51199	2.55828	2.52212
ENSMUSG00000063458	1.02095	0.54573	-0.04906	-1.28189	0.32274	0.51158	1.07232	0.54392	0.0401	0.84728	0.33977	0.51158	0.59695	0.37102	0.08269	0.46926	0.45643	-0.1396	1.25255	0.14857	0.89853	-0.57351	-0.39298	-0.477	-1.06296	-0.25013	-0.67244	0.47235
ENSMUSG00000063457	2.75963	3.03123	2.98502	2.98351	2.84762	2.96611	2.84172	2.9032	3.15783	2.98928	3.06321	3.07217	3.05407	3.20009	3.00784	2.79191	2.99397	3.26975	3.09289	3.16576	3.07794	3.24709	3.04388	3.26975	3.22344	3.20009	3.10214	3.09661
ENSMUSG00000063455	1.40132	0.97847	1.21401	1.2596	1.20951	0.59531	0.50876	0.56675	0.75064	0.72293	0.79161	0.94127	1.07602	0.94517	1.22949	0.54342	0.54255	0.46104	0.8777	0.29976	0.45715	0.93988	0.97391	0.85448	0.81664	1.09376	1.4194	0.8533
ENSMUSG00000063450	1.88278	1.69989	1.92991	2.16861	1.94542	1.72157	1.64383	1.60106	1.76234	1.21826	1.91595	1.8351	1.7381	1.80876	1.78993	1.59246	1.50929	0.88862	1.99979	1.47827	2.03652	1.25519	1.60018	1.50984	1.36058	0.77042	1.27422	1.26167
ENSMUSG00000063445	2.06321	1.88359	1.76426	1.54912	0.93108	1.21726	1.64418	1.76213	1.83715	1.91442	1.62215	1.69615	1.76618	2.12835	1.39712	1.04096	1.42061	1.38302	1.11401	0.99811	-0.51309	1.24952	0.94164	0.85523	1.45694	1.04835	0.98759	0.91694
ENSMUSG00000063439	1.12695	1.17431	1.32955	1.08083	0.59211	1.02447	1.0763	1.41082	1.2663	0.94981	1.00061	1.00235	0.92494	1.14547	0.82944	0.96816	1.01578	0.91022	0.63005	1.15132	1.27775	1.06113	0.79161	1.00106	1.01338	0.98369	0.73842	0.87302
ENSMUSG00000063430	0.90551	-0.09572	1.11149	1.31206	0.49221	0.46977	0.65126	1.59974	0.39108	1.06113	2.06536	2.19724	2.04669	1.13483	1.11689	-0.54111	-0.81255	-0.64898	2.11366	0.4536	1.71837	1.49423	1.34158	1.44005	2.05406	2.00957	0.84496	1.06448
ENSMUSG00000063415	0.98469	0.69651	1.39754	1.75357	-0.54111	-0.61062	0.9437	1.39037	0.76042	0.49694	1.04335	1.19079	0.98138	1.41562	2.06287	-0.41103	-0.26176	1.73286	1.75052	1.59368	1.07213	0.96229	0.11292	0.33977	1.22977	0.74788	-0.01924	0.55493
ENSMUSG00000063410	2.31048	1.74428	1.48657	1.56472	2.13599	2.0287	2.45341	2.28424	2.15026	1.81311	2.12448	2.15769	2.13479	2.07393	1.95202	2.13532	2.11715	1.69823	1.79261	1.86532	1.81575	1.85026	2.01083	1.96316	1.90375	1.72348	1.92653	1.88292
ENSMUSG00000063406	1.20606	1.06941	0.81881	0.92834	1.27137	1.05289	0.9149	1.1144	1.3246	0.48338	0.35101	0.25843	0.30094	0.35607	0.75989	1.52064	1.20098	0.96326	1.15193	0.87995	0.42515	0.79094	0.67751	0.61052	0.81848	0.86996	0.79918	0.72879
ENSMUSG00000063382	2.30291	2.15337	2.2965	2.30997	2.62354	2.41434	2.19228	2.14932	2.30128	2.3956	2.3956	2.5192	2.43826	2.34775	2.43607	2.38261	2.40697	2.44478	2.37866	2.46511	2.54051	2.38773	2.35826	2.47093	2.38469	2.34607	2.65843	2.35867
ENSMUSG00000063362	1.37163	0.73754	0.75426	0.86205	0.8777	0.74494	1.0395	0.8591	0.92451	0.74191	0.79781	0.7527	1.09125	0.91694	1.16883	1.09262	0.94479	1.08083	1.00429	0.76228	0.80067	0.52671	0.50394	0.58146	0.49378	0.333	0.53601	0.49694
ENSMUSG00000063358	1.74888	1.94071	1.50545	1.62136	1.84848	1.55144	1.52936	1.55001	1.70009	1.60553	1.56149	1.5578	1.70145	1.4738	1.62855	1.86072	1.55316	1.83592	1.88995	2.09241	1.76297	1.86072	1.90494	1.75988	1.73445	1.64872	1.82371	1.69933
ENSMUSG00000063334	1.39667	1.23047	1.41518	1.35788	1.4281	1.64907	1.13311	1.22634	1.4253	1.53503	1.77015	1.75835	1.79561	1.65532	1.64268	1.52708	1.61096	1.20638	1.41545	1.62443	0.99133	1.4194	1.53137	1.4395	1.54538	1.34158	1.36899	1.5383
ENSMUSG00000063317	0.77836	1.44672	1.3086	1.39712	0.68101	0.68983	0.52225	0.73754	0.85163	1.03927	1.02412	1.10216	1.36899	0.99552	1.02052	1.28923	0.88171	0.61793	0.7723	0.9212	0.88807	0.55493	0.14095	-0.49418	-0.81255	-0.1711	0.39175	-0.26602
ENSMUSG00000063296	0.03747	0.03573	0.51231	0.55932	0.99862	1.06913	0.48515	0.66055	0.34108	0.24717	-0.03776	0.15928	0.21252	0.19125	0.22954	0.53734	0.38423	1.10973	1.13353	0.52771	0.90993	0.90681	0.97197	1.02623	0.87476	0.80002	1.02544	0.78339
ENSMUSG00000063275	1.14323	0.62846	0.88587	1.04816	0.94728	1.15088	1.18123	1.24033	0.95875	0.9695	1.21149	1.19183	1.32691	0.60434	0.69453	1.12379	0.76941	1.40302	0.77405	1.2797	1.13139	0.83574	-0.42429	0.26518	0.99787	0.75064	-0.23585	0.71514
ENSMUSG00000063273	1.83772	1.68416	1.81625	1.78894	1.6973	1.67523	1.326	1.39912	1.46201	1.56765	1.24918	1.22395	1.46129	1.58018	1.68226	1.91153	1.72748	1.60154	1.69231	1.61886	1.64857	1.61959	1.64025	1.49457	1.62842	1.60785	1.62701	1.52403
ENSMUSG00000063268	0.76085	1.40509	1.77504	1.71755	0.42705	0.45779	1.99618	1.80015	0.7639	1.07683	1.35875	1.44337	1.79465	0.79746	1.16361	1.21745	1.57085	1.54865	1.50321	1.52634	1.85125	1.76512	1.49331	1.69079	1.55535	1.59015	1.53101	1.57948
ENSMUSG00000063253	1.08474	0.76308	0.65326	0.66339	0.98082	1.16452	0.75034	0.98469	1.05481	0.90271	1.20971	1.20763	1.00387	0.94203	0.9525	1.05666	0.94887	1.15604	1.32809	1.3147	1.11828	1.30554	1.20681	1.11939	1.31724	1.26093	1.1808	1.1808
ENSMUSG00000063236	1.05954	1.1584	0.84233	0.85363	1.65053	1.63197	1.44951	1.5339	1.18036	1.44825	1.68634	1.71215	1.70232	1.65023	1.48126	1.20726	1.3718	1.59327	1.35067	1.40933	0.84912	1.36256	1.39534	1.50827	1.55893	1.49185	1.3467	1.39503
ENSMUSG00000063229	2.77391	3.09289	2.86782	3.06604	3.25569	3.22344	3.21121	3.20322	2.78148	2.86371	3.04947	2.87897	2.80494	2.40481	2.84923	2.8726	2.86171	3.19283	2.71612	2.91316	2.79191	2.827	2.57158	2.4704	2.98502	2.8289	2.94654	2.88624
ENSMUSG00000063200	1.78964	1.68448	1.91954	1.85159	1.61886	1.76051	1.58311	1.69603	1.62795	1.88741	1.81797	1.72329	1.76329	1.76843	1.55637	1.77692	1.8347	1.67736	1.82197	1.7767	1.98328	1.6219	1.93912	1.85545	1.93871	1.8529	1.84699	1.87928
ENSMUSG00000063179	1.27137	1.15193	1.25895	1.31564	0.36433	0.74762	1.22931	1.22711	1.18149	1.15656	1.39064	1.34254	1.27477	0.99604	1.01338	0.842	1.00687	0.83168	1.24393	1.15193	1.33787	0.66888	1.2805	1.15395	1.09819	1.00429	1.09744	1.0466
ENSMUSG00000063172	1.11915	0.60197	0.80624	0.55025	1.19679	1.32264	1.16472	1.38819	1.1462	1.24199	1.08957	1.06941	0.84009	1.06887	1.12982	1.31276	1.42377	1.02623	1.08412	1.05999	1.31393	1.23359	1.1418	1.19413	1.47363	1.37626	0.95734	1.3764
ENSMUSG00000063166	2.03819	2.03141	2.4976	2.39216	2.10129	2.29856	1.95705	1.98691	2.6511	2.13035	2.13454	2.12146	1.94493	2.03443	1.96255	2.01257	2.17557	2.24325	2.02344	2.01497	2.14278	2.27202	2.10102	2.1131	2.36701	2.16986	1.91002	2.08663
ENSMUSG00000063160	2.03512	1.66124	1.66206	1.64857	1.98127	2.22722	2.04295	2.07236	2.07169	1.8247	1.83051	1.91682	1.68102	1.78447	1.87981	1.62097	1.81965	2.51433	2.04059	2.55894	2.1209	2.27413	2.18999	2.26699	2.16467	2.25004	2.15131	2.2426
ENSMUSG00000063146	2.41113	2.40345	2.42977	2.40909	2.46892	2.47866	2.21792	2.28334	2.53826	2.34429	2.23802	2.32454	2.07869	2.37115	2.31729	2.27008	2.32969	2.16531	2.41061	2.41368	2.32411	2.4584	2.18077	2.29162	2.20984	2.30798	2.36053	2.16772
ENSMUSG00000063145	1.1388	1.08937	0.94104	1.00861	1.08534	1.21082	0.93284	1.13729	0.96584	1.16343	1.18217	1.17931	1.16013	1.14952	1.06565	0.75839	0.94496	0.9525	0.87964	1.01956	1.34174	1.03826	1.1936	1.17024	1.22765	1.10056	1.25197	1.00303
ENSMUSG00000063063	2.33798	0.07223	0.75839	0.64354	2.3956	2.19423	2.48411	2.48268	-0.64898	2.71001	2.46306	2.32969	2.64231	2.959	3.03404	-0.11125	-0.44503	2.40174	2.77199	2.5211	2.47591	2.13599	2.26646	2.15508	2.13778	1.87194	2.28301	2.20626
ENSMUSG00000063052	0.90844	1.00081	1.3301	1.20638	1.70576	1.62428	1.05724	1.03752	1.41043	1.21331	1.07536	1.00573	1.07928	1.37626	1.45189	1.5779	1.35523	1.04592	0.91711	1.15483	0.90107	0.95544	1.00838	0.8777	1.13333	1.04803	0.99073	0.95798
ENSMUSG00000063049	0.88715	0.93736	1.06113	0.94546	0.92806	1.00905	0.73543	0.64766	0.97086	1.05528	0.81516	0.81035	0.73008	0.8843	1.02768	0.84233	0.85959	0.93574	1.92578	1.30451	1.5007	1.14011	1.62671	1.5418	1.386	1.37468	1.47323	1.47396
ENSMUSG00000063019	1.26694	1.18958	1.37144	1.4146	1.26378	1.42048	1.36194	1.48427	1.35084	1.06565	1.18798	1.31018	1.30786	1.42017	1.37626	1.16898	1.17086	1.30313	1.21655	0.41997	1.48037	1.0986	1.07465	1.1923	0.99626	1.15242	0.99732	1.04096
ENSMUSG00000063015	2.21049	2.41061	2.29735	2.28494	2.32321	2.18384	2.30239	2.45015	2.16367	2.51846	2.37623	2.23378	2.15794	2.39405	2.61826	2.35626	2.4658	2.3771	2.3525	2.32857	2.48985	2.44421	2.55399	2.40383	2.5211	2.35826	2.47866	2.63058
ENSMUSG00000062991	0.73504	0.21675	-0.30789	-0.24305	1.83557	1.68226	1.06523	0.85192	1.97098	1.51417	-0.76648	-0.85647	-0.11125	0.35988	0.34108	1.05377	0.62731	0.16722	1.93519	1.08614	1.91327	-0.33057	0.14857	0.18944	0.69074	-1.06296	1.13118	0.93988
ENSMUSG00000062981	1.52158	1.51108	1.65424	1.59353	1.49292	1.82029	1.45038	1.63571	1.60878	1.5618	1.46798	1.55082	1.44441	1.42098	0.97486	1.49277	1.54865	1.39754	1.46475	1.53815	1.3034	1.19563	1.53201	1.54324	1.28398	1.27106	1.2925	1.30572
ENSMUSG00000062980	2.34847	1.17919	1.22352	1.76602	1.26444	1.09819	0.28611	0.33876	1.4847	0.35907	-0.3019	-0.04906	-0.8376	0.34644	0.49644	1.0763	0.85804	1.55334	1.52172	1.02544	0.85395	1.78985	1.07044	0.99763	1.19551	0.68262	0.86354	1.75586
ENSMUSG00000062963	2.25793	1.87042	1.73207	1.61616	1.65694	1.77941	1.80383	1.87593	1.93967	1.71309	1.72389	1.70403	1.71614	1.83296	1.86479	1.73207	1.81817	1.93475	1.6463	1.53246	1.58709	1.57929	1.60726	1.61859	1.78585	1.72289	1.63026	1.85061
ENSMUSG00000062949	0.97847	0.50673	0.98498	1.09839	1.25393	1.21232	1.07305	1.26705	0.58027	0.81099	1.08412	0.90457	1.18798	0.75193	0.75322	1.26471	1.03065	0.91813	0.81484	0.53094	0.81417	0.7527	0.74575	0.4373	0.378	0.60383	0.90434	0.36505
ENSMUSG00000062937	1.47616	1.16629	1.17236	0.95576	1.73165	1.69603	1.65532	1.67781	1.4284	1.72157	1.15643	1.14486	1.22693	1.28502	1.21826	1.08793	1.13774	1.55581	1.55507	1.67676	1.50574	1.35745	1.26289	1.26514	1.54362	1.25535	1.40576	1.2866
ENSMUSG00000062929	1.45673	1.83363	1.81486	1.91682	1.79288	1.91153	1.44222	1.58122	1.58575	1.94239	1.66763	1.6018	1.72289	1.81258	2.12213	2.16925	1.76998	1.62687	1.4716	1.27832	1.68833	1.53503	1.42076	1.44937	1.59858	1.61139	1.51345	1.45949
ENSMUSG00000062908	1.93095	1.53879	1.53592	1.54636	1.33427	1.21608	1.04273	1.00662	0.8733	1.28418	1.01896	1.03725	1.14569	1.06295	1.2178	1.30298	1.39118	1.65532	1.48482	1.33678	1.17637	1.23397	1.42182	1.34324	1.12429	1.22595	1.14763	1.62814
ENSMUSG00000062906	1.29764	2.15565	2.03796	1.98882	1.17042	1.34523	1.61647	1.57426	1.41184	1.96877	1.9293	1.98328	1.83883	2.06562	1.87135	1.29402	1.51745	1.71599	1.36274	1.44602	1.72389	1.92484	1.84504	1.9515	1.67723	1.68732	1.68148	1.41503
ENSMUSG00000062901	1.25255	1.56385	0.70648	0.73842	1.23433	1.1375	1.34798	1.23601	0.98603	1.43336	1.51774	1.39848	1.55705	1.35275	1.47339	1.48837	1.49346	1.1778	1.55705	1.21272	1.4186	1.50321	1.78412	1.59878	1.22471	1.30834	1.70424	1.61779
ENSMUSG00000062867	2.2489	2.7625	2.68504	2.57912	2.35196	2.22501	2.07771	2.13877	2.55673	2.72229	2.28494	2.30563	2.48205	2.51199	2.42377	2.38564	2.44421	2.80126	2.51277	2.64058	2.44546	2.7026	2.50329	2.44886	2.72921	2.60588	2.53268	2.72367
ENSMUSG00000062866	0.85634	0.91992	0.8789	1.12246	1.1398	1.0588	0.81759	0.62566	0.76714	1.18582	1.05572	1.0499	1.24865	0.56324	0.86376	1.06583	0.76601	0.17664	0.80547	0.45779	0.10714	0.52283	0.60694	0.4536	0.25136	0.5684	0.68471	0.75546
ENSMUSG00000062822	0.65517	0.50237	0.882	0.65326	0.41203	0.74846	-0.1159	-0.219	0.83199	0.48515	-0.51309	-0.76648	-0.21381	0.53094	0.36601	0.1429	0.1293	0.25941	0.05532	0.06808	0.40665	0.67331	0.40665	0.45643	0.78533	0.31626	0.40244	0.31157
ENSMUSG00000062797	1.72982	1.57777	1.84684	1.82627	1.06699	1.28901	1.29046	1.35875	1.60321	1.66688	1.73792	1.70024	1.58529	1.61486	1.72032	1.82669	1.64792	1.67506	1.17834	1.68148	1.42544	1.40933	1.42626	1.43977	1.45937	1.57049	1.50645	1.43348
ENSMUSG00000062762	1.8651	2.01948	1.85823	2.00733	1.91836	1.81471	1.67796	1.70145	1.7327	1.94383	2.0922	2.01124	1.97697	1.86713	1.73582	1.95379	1.75654	1.7905	2.00092	1.76806	1.93048	1.96331	1.94814	1.93614	1.88136	1.83031	1.96389	1.89049
ENSMUSG00000062761	1.69315	1.26234	1.1423	1.09982	1.50912	1.38019	1.55382	1.35836	1.26798	1.08859	1.15275	1.11164	1.12207	1.19303	1.19845	1.63571	1.55193	1.11126	1.1926	1.54324	0.94815	1.46839	1.48092	1.37887	1.39166	1.49503	1.60251	1.56647
ENSMUSG00000062753	1.31068	1.37937	0.81484	0.47916	1.32407	1.38115	1.22854	1.23581	1.63327	1.43	1.21551	1.34358	1.25104	1.31298	1.15799	1.16373	1.25929	0.93688	1.22179	1.18828	0.84534	1.00235	0.83876	1.14033	1.02838	0.77955	0.8618	0.98603
ENSMUSG00000062729	1.38579	2.16223	2.00944	2.06729	1.36194	1.43256	1.48427	1.5396	1.39243	1.18662	2.05609	2.1106	2.18416	1.59988	1.50957	1.04439	1.1375	1.61734	1.26875	1.63782	1.42928	1.34609	1.61761	1.65341	1.35807	1.38364	1.5738	1.37903
ENSMUSG00000062691	0.2899	0.68524	0.45976	0.59078	0.72045	0.87834	0.69681	0.95472	1.2925	0.91545	0.81759	0.79094	0.56094	0.68611	0.82433	1.0464	1.04741	1.02806	0.64597	1.37556	1.36109	1.21401	1.13095	1.10936	1.43669	1.48053	0.88837	1.27422
ENSMUSG00000062687	0.93303	0.65326	1.27938	1.18828	1.10083	1.45708	1.11458	1.17552	1.39503	1.23993	1.38432	1.48721	1.38398	1.44859	1.15257	1.20839	1.33618	1.02356	0.4551	1.12937	1.00352	1.19281	1.26471	1.23088	1.53246	1.22556	1.16662	1.20234
ENSMUSG00000062661	1.93851	1.42675	1.19937	1.29793	1.15711	1.29829	0.85163	1.21064	1.58709	1.62459	1.46686	1.67229	1.60074	1.87826	1.79261	1.22728	1.11126	1.32163	1.1166	1.27908	1.22789	1.46279	1.25663	1.34872	1.21988	1.28284	1.2915	0.93021
ENSMUSG00000062646	0.65293	1.00135	0.4373	0.73269	1.10819	1.28063	0.82195	1.07796	1.23433	0.46699	0.48582	0.60246	0.53788	0.56565	0.475	0.31978	0.42878	1.11358	0.83199	0.6268	0.73058	0.48448	0.28847	0.17078	0.10119	0.60154	0.59954	0.6309
ENSMUSG00000062627	0.91117	1.15979	0.54573	1.01251	0.84339	0.75164	1.55637	1.37504	0.9844	1.1124	0.79881	0.50237	0.88982	0.78566	0.94315	0.74119	0.66234	1.40999	1.48523	1.02008	1.21869	1.17289	1.37243	1.19079	1.08756	1.37704	1.26838	1.6478
ENSMUSG00000062619	0.8611	0.54786	0.72793	0.86996	0.72404	1.13209	0.5514	0.8498	1.18339	0.93933	1.25874	1.3947	1.07683	0.52552	0.46699	0.06637	0.25136	0.91736	0.48835	-0.67244	0.5462	1.01751	0.77405	0.938	0.97871	0.882	0.69418	0.95649
ENSMUSG00000062604	1.58689	1.34626	1.40241	1.38494	1.48992	1.40509	1.45325	1.45072	1.49816	1.50173	1.58003	1.46064	1.47649	1.41725	1.55193	1.69876	1.64268	1.60304	1.83859	1.74861	1.63237	1.51059	1.51805	1.51345	1.43	1.36655	1.52708	1.58892
ENSMUSG00000062590	1.58746	1.3888	1.48364	1.43032	1.81833	1.94342	1.68369	1.59015	1.55041	1.07389	1.54011	1.54011	1.30424	0.91144	0.91813	1.64434	1.60138	1.43481	1.46617	1.31039	1.58892	1.48879	1.59894	1.6262	1.44287	1.44672	1.63133	1.59065
ENSMUSG00000062580	1.78522	1.70645	1.76823	1.77469	1.80938	1.82353	1.498	1.66406	2.22688	1.79374	1.95186	1.93337	2.01768	2.00692	2.08314	1.73952	1.49167	1.94046	1.86189	1.7637	1.6786	1.44639	1.62078	1.5409	1.60726	1.61004	1.51171	1.60768
ENSMUSG00000062563	1.28502	0.45976	0.26518	0.26026	-0.39975	-0.00456	0.68983	0.98138	0.18864	0.31978	0.96517	1.15504	0.71135	0.15058	0.16819	0.04963	0.35988	0.41997	0.78181	-0.88769	0.26518	1.16489	0.73373	1.00429	0.72045	0.91472	0.74534	0.90133
ENSMUSG00000062526	0.7022	1.71309	1.18061	1.3145	1.95424	2.08716	1.61874	1.82444	1.51996	2.02818	1.72736	1.78964	1.5983	1.5716	1.48721	1.68086	1.94898	1.48879	1.4146	1.38189	1.08269	1.43702	1.36655	1.36484	1.27205	1.17144	1.09696	1.46279
ENSMUSG00000062510	1.15604	0.32274	0.62096	0.65468	0.82626	0.69911	0.91736	0.9223	0.53143	0.4373	0.08269	0.05445	0.21965	0.81312	0.79959	0.91117	0.94348	0.06808	0.28847	0.56383	0.35988	0.72926	0.05445	0.24981	0.75618	0.03747	0.30922	-0.04483
ENSMUSG00000062480	1.31365	2.24196	2.54942	2.35568	1.89507	1.7214	1.5076	1.79541	1.97232	2.30997	1.59894	1.50357	1.64302	1.88531	1.9674	2.19399	2.1689	1.60535	1.87213	1.34984	1.75157	1.54373	1.58487	1.61798	1.43857	1.50309	1.46736	1.52064
ENSMUSG00000062421	1.37482	0.46471	0.42433	0.03573	-0.0721	-1.20595	1.08147	0.75919	0.59487	1.37144	1.66897	1.61761	1.69356	1.1517	1.36776	1.91197	1.62176	1.28869	0.89457	1.63461	1.22317	1.93967	1.5396	1.49907	1.85406	1.67723	1.28802	1.5567
ENSMUSG00000062397	1.50523	1.17902	1.24918	1.31944	1.35117	1.71023	1.14976	1.24281	1.66077	1.51532	1.49149	1.43882	1.28621	1.44069	1.16143	1.2307	1.37951	1.48377	1.55178	1.69422	1.49115	1.47696	1.48879	1.66575	1.46025	1.51108	1.45673	1.56602
ENSMUSG00000062382	3.35284	3.44769	2.99997	3.07217	3.40317	3.72112	3.11633	3.05407	3.74431	3.33642	3.80046	3.80046	3.54814	3.70091	3.44769	2.92807	2.99162	3.65556	3.87665	3.26527	3.14335	3.43736	3.80046	3.96166	3.44769	3.39455	3.80046	3.62226
ENSMUSG00000062376	0.59487	0.29886	0.68064	0.54042	0.92466	1.31316	0.84912	1.06717	1.48053	0.64087	0.92451	0.90192	0.59211	1.00794	0.8591	0.378	0.16949	0.55554	0.78451	0.41014	0.44509	0.98165	0.68262	0.87075	0.94265	0.71055	0.91268	0.81203
ENSMUSG00000062373	1.58032	1.28431	1.052	1.26321	1.04245	0.90651	0.56626	1.1049	1.06784	0.86059	1.00703	0.95798	0.85448	1.06099	1.19584	1.0865	0.91518	1.26397	0.9552	1.22693	1.11597	1.05742	1.18187	1.1342	0.89457	0.78724	0.98785	0.88691
ENSMUSG00000062352	1.68658	1.64143	2.03553	2.01059	1.91133	1.88075	1.29466	1.38222	1.94561	1.58602	1.49767	1.57527	1.38285	1.3533	1.17125	1.48867	1.32221	1.87994	1.52842	1.60977	1.37556	1.50738	1.29884	1.37274	1.53942	1.52267	1.18303	1.43921
ENSMUSG00000062312	2.31592	2.1212	2.10437	2.06321	2.16746	2.17469	2.19024	2.25294	2.17661	2.19796	2.39405	2.47146	2.41002	2.28049	2.29012	2.20626	2.29537	1.8739	2.01478	2.1106	2.25687	2.1281	2.13214	2.25254	2.0316	1.9992	2.23674	2.06374
ENSMUSG00000062300	1.81871	2.02064	1.68071	1.89796	1.95972	2.20057	1.29299	1.21423	1.33879	1.45916	1.95087	2.0278	2.12754	2.25121	2.27743	1.70901	1.68833	1.89631	0.1978	0.63993	1.54879	1.3519	1.49443	1.60606	1.21655	1.44287	1.41169	1.32544
ENSMUSG00000062270	2.4348	2.6511	2.73721	2.75259	2.5438	2.53405	2.53748	2.55992	2.50413	2.63751	2.67828	2.59972	2.63288	2.5522	2.56068	2.56624	2.54597	2.72229	2.71488	2.55673	2.63654	2.43562	2.73044	2.59147	2.61294	2.59879	2.57912	2.57068
ENSMUSG00000062248	1.06997	0.84056	1.49996	1.33806	0.43274	0.68944	0.55437	0.49878	1.28603	0.92208	1.09284	1.05245	0.95179	1.56765	0.92184	1.00662	0.96326	0.68719	0.72045	1.23721	0.72257	1.58324	0.85425	0.90796	1.83695	1.27491	0.81664	0.87046
ENSMUSG00000062234	2.08314	2.1565	2.22887	2.21178	2.23578	2.20959	2.47292	2.44546	2.44288	2.11881	2.12861	2.20984	2.1592	2.11572	2.16168	2.10595	2.0524	2.36646	2.26944	2.39216	2.63058	2.37163	2.41002	2.35346	2.32758	2.33179	2.41191	2.35681
ENSMUSG00000062232	1.6786	1.67723	1.59353	1.91002	2.03266	1.79191	1.84757	1.7718	1.8745	1.75552	1.44502	1.3419	1.66373	1.3169	1.46669	1.62136	1.46718	1.28785	1.41202	1.40749	1.79525	1.73568	1.45842	1.33246	1.36293	1.6478	1.57244	1.52625
ENSMUSG00000062210	1.05159	-0.00905	0.5233	0.00689	0.73666	0.78047	0.69947	0.88587	1.00937	-0.06204	1.26723	1.23964	1.18321	0.73454	0.66282	0.00107	0.3629	0.47749	0.7445	0.71424	0.30544	-0.1802	0.20204	0.40495	0.40844	0.519	0.25941	0.31978
ENSMUSG00000062203	2.35426	2.10155	2.04929	2.01871	2.28984	2.10289	1.89114	2.00129	1.95067	2.24161	1.81225	1.73322	2.03537	2.07977	2.13005	2.28494	2.06649	2.24161	2.19923	2.31317	2.26459	2.09495	2.06195	1.98308	2.17137	1.94655	2.00348	2.04496
ENSMUSG00000062202	1.68513	1.34471	1.48216	1.64715	1.71888	1.78814	1.70195	1.68416	1.63056	1.06428	1.12902	1.33649	1.31101	0.96279	1.0412	1.53879	1.31675	1.12591	1.00506	1.35563	1.29419	1.47464	1.39357	1.39897	1.07708	1.26185	1.47809	1.1043
ENSMUSG00000062198	0.72517	0.41468	0.36505	0.53474	0.95649	1.05954	0.85102	0.95679	0.41203	0.62621	0.60197	0.7101	-0.33859	0.10119	0.27735	0.31406	0.15455	0.79161	0.57396	0.07939	1.05923	1.14997	0.72076	0.70482	1.07448	0.85523	0.45047	0.71135
ENSMUSG00000062190	1.03667	1.69855	1.97898	1.86929	1.62552	1.63816	1.02643	1.11309	1.39712	1.23204	1.31414	1.30799	1.43977	1.17108	0.93165	1.38667	1.4847	0.91209	1.04245	1.34072	1.01412	1.21433	1.17902	1.05767	1.11221	1.22575	1.32221	1.12591
ENSMUSG00000062175	0.29069	0.89061	0.97539	1.01913	0.55218	0.75839	0.83317	0.70754	0.74534	0.68262	1.10936	1.16842	1.30898	1.0452	0.8733	0.74013	0.80067	0.70309	0.48064	-0.28261	0.74494	0.8667	0.8618	1.06784	0.62731	0.95179	0.65375	0.45643
ENSMUSG00000062169	1.27011	1.44189	1.63662	1.57244	1.2821	1.47788	1.42263	1.40212	1.77968	1.42857	1.39088	1.43804	1.33427	1.24329	1.07837	1.29419	1.42363	1.84348	1.27677	1.56095	1.51279	1.26931	1.64608	1.6067	1.53353	1.26428	1.42133	1.29486
ENSMUSG00000062127	1.33908	1.57948	1.58661	1.35627	1.63749	1.2915	1.52764	1.39595	1.27634	1.04335	0.96872	0.85546	1.07323	1.06469	0.9968	1.57311	1.13042	1.22535	1.22101	1.09481	1.45642	1.29781	1.38049	1.26535	1.34815	1.36092	1.35612	1.21853
ENSMUSG00000062115	1.86532	1.56977	1.70388	1.76969	2.1183	1.99326	2.07869	2.13747	1.96611	2.09306	1.83192	1.93269	1.73854	2.04817	2.03027	2.15452	2.10661	1.95893	1.98147	1.99739	2.14133	1.80722	1.79507	1.93941	1.679	1.84293	1.9081	1.79191
ENSMUSG00000062110	1.43921	1.46885	1.22338	1.38254	0.94949	1.13225	1.0305	1.1423	1.35612	1.33102	1.25219	1.22436	1.28333	1.16048	1.29034	1.32221	1.34832	1.30371	1.06565	1.19508	1.36671	1.30313	1.13713	1.17125	1.34299	1.33513	1.32241	1.35595
ENSMUSG00000062098	0.52365	1.35905	0.76632	0.83574	1.03904	0.635	0.82069	0.74096	0.72926	1.26307	0.90744	0.84056	1.07448	1.23804	1.3414	1.03109	0.74494	0.93165	1.07448	0.80869	0.77308	0.94079	0.86815	0.63195	1.03219	0.92311	0.96517	0.98287
ENSMUSG00000062083	3.27866	3.41909	3.62226	3.41909	3.39455	3.40943	3.26062	3.22344	3.42857	3.56103	3.28347	3.27294	3.2324	3.3073	3.11954	3.3073	3.50064	3.44769	3.35284	3.45881	3.31916	3.38829	3.45881	3.42857	3.58145	3.52461	3.46717	3.50064
ENSMUSG00000062078	1.94967	1.8309	1.76051	1.86189	1.68114	1.43268	1.63847	1.5205	1.4657	1.76297	1.62038	1.58122	1.76181	1.91991	2.05898	1.9515	1.69536	1.54208	1.60286	1.76951	1.69405	1.70119	1.699	1.54196	1.4691	1.65472	1.94185	1.54128
ENSMUSG00000062054	1.50357	1.36176	1.60927	1.47774	1.34523	1.44951	1.70212	1.76739	1.75521	1.5891	1.55021	1.54449	1.62038	1.61829	1.78365	1.77858	1.83241	1.43227	1.44751	1.33157	1.54251	1.629	1.4955	1.56209	1.73582	1.42263	1.65903	1.77732
ENSMUSG00000062040	0.76669	-0.11125	-0.09152	0.18682	0.99251	1.16773	1.12571	1.2656	0.47836	0.47749	0.18682	0.37597	-0.06945	0.13431	0.06128	0.68611	0.5625	0.72708	0.76941	0.00419	0.52721	0.59122	1.08242	1.0765	0.98287	0.68204	1.10317	0.95875
ENSMUSG00000062031	1.98029	1.78814	0.7157	0.58698	1.64647	1.72736	1.93683	1.71645	1.79354	1.86602	2.11857	2.10803	2.00777	2.14534	2.11811	1.86002	2.00733	1.92991	0.75459	1.60943	1.6684	1.47638	1.59845	1.68782	1.48287	2.06783	2.11972	1.68616
ENSMUSG00000062014	0.91637	0.71837	0.91399	0.89572	1.44578	1.38977	0.84009	0.76228	1.4601	0.73373	0.82232	0.82142	0.69418	0.668	0.8279	0.99973	0.58369	0.85448	1.10006	0.93688	1.0964	0.99429	1.04401	0.97576	0.87075	1.25011	0.90681	1.12379
ENSMUSG00000062012	0.91083	1.51017	1.46307	1.34254	1.21433	1.48399	1.61096	1.57846	1.35441	1.43591	1.75458	1.79561	1.62286	1.68844	1.52723	1.27696	1.44145	1.16547	0.93609	1.00627	1.15587	1.25795	1.45743	1.62428	1.31206	1.86372	1.49034	1.33908
ENSMUSG00000061981	2.19445	2.43997	2.1789	2.16531	1.85125	1.95128	2.39162	2.37445	2.36764	2.25358	2.23159	2.29052	2.14647	2.15733	1.9776	2.04669	2.02503	2.25996	2.39216	1.84757	2.11598	2.20311	2.11106	2.19301	2.06562	1.97658	2.13847	2.06833
ENSMUSG00000061979	1.68747	1.63749	1.62005	1.58928	1.9674	1.95498	1.96369	2.08663	1.78142	1.91327	1.93538	1.99876	1.8143	1.68479	1.43857	1.36689	1.51312	1.57704	1.42329	1.49947	1.3554	1.60286	1.33544	1.4345	1.53228	1.637	1.38667	1.5678
ENSMUSG00000061950	2.13454	1.73011	1.76194	1.79885	2.35524	2.33369	1.85743	1.70424	1.71457	2.1293	2.22199	2.26699	2.21128	2.1334	2.10372	1.43591	1.32618	1.74797	2.02084	1.79905	2.13005	2.23323	2.21049	2.10803	2.00944	2.14081	2.10884	2.14932
ENSMUSG00000061904	2.79629	2.86782	2.79191	2.80126	2.83785	2.87897	2.8289	2.8082	2.57646	2.87469	2.82362	2.77983	2.8082	2.80653	2.84381	3.03123	2.97251	2.83508	2.8982	2.942	2.69888	2.77983	2.77831	2.69481	2.7625	2.72496	2.64689	2.81623
ENSMUSG00000061887	1.83241	1.67301	1.89796	1.85438	2.09649	2.10627	1.62065	1.76806	1.74162	1.59647	2.08617	2.12891	2.03481	1.89373	1.90659	1.68416	1.89591	1.81833	1.64448	2.01658	1.97119	1.92343	1.89135	1.93225	1.83213	1.95223	1.89015	1.8315
ENSMUSG00000061878	2.26839	2.29766	2.06015	2.00462	0.35215	0.47046	1.61842	1.63536	2.50743	1.72607	2.31409	2.33925	2.3792	2.28494	1.89325	2.00957	2.13183	1.11208	2.26269	2.01083	2.62755	1.78483	1.44937	1.54763	1.75966	1.85005	1.31657	1.97549
ENSMUSG00000061859	1.00323	0.57017	0.23949	0.15058	1.65293	1.6156	1.51805	1.5678	1.48126	0.85702	0.81417	0.79431	1.03904	-0.21381	0.33743	0.92097	0.78451	0.97221	0.75732	1.1881	1.48364	1.20317	1.29133	1.16708	0.82944	1.39883	1.41363	1.03777
ENSMUSG00000061838	0.70309	1.40549	1.77858	1.61946	1.63148	1.54476	1.49674	1.68058	1.43623	1.9068	2.07509	2.09069	2.22199	1.99527	1.8878	1.61829	1.6219	1.77083	1.8741	1.77112	1.39392	1.45293	1.2795	1.21401	1.36506	1.71409	1.24281	1.45828
ENSMUSG00000061787	2.80969	2.92151	2.39372	2.39623	3.15441	3.21523	2.8982	2.90912	3.30306	3.25569	3.01112	2.99997	2.88392	3.06604	2.96611	2.90052	3.10214	3.02123	3.07518	2.91114	3.08444	3.12932	3.13198	3.13958	3.20322	3.20697	3.06066	3.15441
ENSMUSG00000061778	0.64529	1.04378	0.82626	0.88476	1.03777	1.02838	1.37322	1.31637	0.95982	1.21608	1.17834	1.10936	1.07982	1.08876	1.25339	1.28837	1.07683	0.93192	0.90681	0.88476	0.79534	0.78757	0.74338	0.61488	0.70353	0.62208	0.71228	0.85523
ENSMUSG00000061759	1.09328	1.04273	0.72618	0.82267	0.93756	0.01243	1.5081	1.55525	0.89853	1.212	0.79638	0.66282	0.77887	0.66509	0.84269	1.83536	1.61981	0.90337	1.39088	1.25795	1.10317	1.23804	1.02784	1.03904	1.18217	0.99046	1.13528	1.06378
ENSMUSG00000061755	0.84433	1.6895	1.28765	1.45325	1.58018	1.75586	1.51515	1.36574	1.30491	1.71441	0.97197	0.75839	1.03309	0.94668	1.00648	1.25489	1.17582	1.22069	1.49568	1.05352	1.61694	1.24553	1.55399	1.45343	1.18163	1.20971	1.5148	1.28262
ENSMUSG00000061731	1.91761	2.45785	2.05389	1.94791	2.20121	2.23518	2.32454	2.31592	2.25214	2.68219	2.30727	2.27959	2.49558	2.18975	2.35826	2.0941	2.05367	2.01768	2.4571	2.53891	2.08242	2.28134	2.09121	2.03237	2.24092	1.97808	1.96316	2.34076
ENSMUSG00000061689	2.05585	2.15946	1.7976	1.95443	2.59541	2.54597	2.18674	2.16567	2.75568	2.21435	1.99696	2.08371	2.114	2.23719	2.40383	2.25325	2.16338	2.21049	2.34277	2.39316	1.96104	2.43826	2.36646	2.41754	2.26699	2.18999	2.18384	2.28424
ENSMUSG00000061666	1.00506	1.17236	0.74762	0.85804	0.89457	0.7179	0.57843	0.64639	0.60741	0.43956	-0.05583	-0.20708	-0.91298	0.07939	-0.07794	0.26238	0.36689	0.80698	1.10174	0.86582	0.94604	0.65778	0.99453	0.95956	0.31406	0.76669	0.78639	0.64991
ENSMUSG00000061665	0.98258	1.3489	1.25854	1.30451	1.54848	1.39485	1.4281	1.51171	1.27856	1.40605	1.42722	1.31889	1.4738	1.13547	1.37887	2.03598	1.60768	1.18978	1.29692	1.49185	1.19907	1.34235	1.31637	1.23359	1.3955	1.38285	1.37322	1.32577
ENSMUSG00000061650	0.57919	1.03008	0.93528	0.83225	0.98603	1.26809	0.93756	0.9491	0.81555	1.01773	1.07507	1.20001	1.02904	0.80492	0.75696	0.67118	0.83445	0.90775	0.69453	1.03752	0.65842	0.99732	0.44981	0.87802	1.12591	1.23416	0.70648	0.92889
ENSMUSG00000061613	2.21573	2.0278	2.26646	2.2516	1.90733	1.97143	2.02847	2.03652	2.21825	2.24503	2.06649	1.99718	2.05954	2.17469	1.95774	1.9499	2.12641	1.86622	1.98229	2.07169	1.9809	1.89729	2.09326	2.05732	2.12296	1.93967	1.96274	1.91726
ENSMUSG00000061607	1.14435	1.66465	1.66546	1.55746	1.49475	1.40324	1.61779	1.44735	1.21569	1.3899	0.86326	0.96676	1.04378	1.20448	1.55733	1.69301	1.81607	1.17144	1.51504	1.20234	1.11417	1.28239	1.237	1.21256	1.19018	1.17902	1.44937	1.12448
ENSMUSG00000061603	0.70946	0.16253	0.35907	0.6055	1.50523	1.8258	0.4191	1.12063	1.46718	1.55382	1.31889	1.28964	1.34375	1.06868	1.7948	0.1853	0.33876	0.13604	0.32536	0.08086	0.43956	0.7098	0.10714	-0.09152	0.13938	0.24398	0.58768	-0.1802
ENSMUSG00000061589	1.38349	1.70576	1.73388	1.76771	2.03819	1.8878	1.8741	1.8347	1.92524	1.91234	2.1218	2.18943	2.08963	2.30204	2.32111	1.93758	1.85005	1.7174	1.94092	1.82095	2.13454	1.81184	1.59631	1.84591	1.885	1.91442	1.69705	1.65599
ENSMUSG00000061559	1.80223	1.9937	2.13694	2.00692	1.67031	1.72982	1.79812	1.8916	1.55829	1.75331	1.60286	1.54795	1.64958	1.51047	1.4657	1.85664	1.93337	1.77572	1.88795	1.83254	1.82227	1.83123	2.03141	1.95608	1.9863	1.90846	1.9937	1.88719
ENSMUSG00000061536	0.90993	0.77266	0.85235	0.92747	1.22436	1.25448	1.37033	1.38207	1.36725	-0.04906	0.3629	0.44185	0.28847	0.02347	0.46855	0.64766	0.70789	0.76228	1.05902	0.49221	0.778	0.48252	0.83225	0.43469	0.33172	0.26116	0.48714	0.20204
ENSMUSG00000061533	0.51231	0.19647	1.1277	1.07116	0.6268	0.50941	0.15811	0.39015	0.44602	0.26238	0.50609	0.42198	0.51342	1.09047	0.79612	0.56891	0.28103	0.37179	-0.17647	0.46614	0.74296	0.98759	0.62385	0.56565	1.11261	0.54686	0.60694	0.35717
ENSMUSG00000061479	1.55843	1.48338	2.10884	1.98514	1.64701	1.70807	1.60508	1.69115	1.89997	1.85005	1.59603	1.63536	1.77941	1.93357	1.64922	1.73834	1.76823	1.61577	1.5779	1.74217	1.54987	1.75835	1.58018	1.61268	1.92151	1.73516	1.50587	1.5037
ENSMUSG00000061477	3.12614	3.06066	3.3073	3.25219	3.12207	3.1113	3.06604	2.98502	3.19645	3.43736	3.25219	3.31305	3.41909	3.33924	3.10826	3.10826	3.31916	3.13198	3.15084	3.09001	3.09289	3.30306	3.22814	3.25219	3.3073	3.22814	3.12932	3.10214
ENSMUSG00000061474	1.40464	1.06913	1.11384	1.25929	1.51312	1.69662	1.95546	1.97965	1.53843	1.59988	1.44055	1.49503	1.30252	1.37212	1.31675	1.30392	1.35422	1.50047	1.39817	1.26289	1.23621	1.33073	1.4138	1.41713	1.53786	1.45189	1.25598	1.39832
ENSMUSG00000061461	0.99998	0.62516	0.41014	0.28611	0.81275	1.00429	0.44602	0.69866	1.11689	0.72843	1.00277	1.0325	0.49527	0.85295	1.12354	0.59078	0.72334	0.86767	0.87802	0.95297	0.48139	0.21343	0.58768	0.60694	0.59766	0.66888	0.61294	0.74686
ENSMUSG00000061458	1.71202	1.4819	1.60988	1.42446	1.65489	1.62272	1.54406	1.60251	1.65867	1.45097	1.48377	1.48657	1.55082	1.22575	1.24691	1.55719	1.59264	1.42657	1.46379	1.46462	1.66346	1.79632	1.67328	1.67752	1.88853	1.74315	1.68114	1.74249
ENSMUSG00000061455	1.24703	0.73314	0.08514	0.2274	0.87932	0.83136	0.38718	0.40665	0.37444	0.92619	0.78533	0.75776	0.70309	0.5745	0.81275	0.9516	0.72107	0.80785	1.14379	0.52365	1.18978	0.64991	0.68683	0.59766	0.62417	0.55802	0.77924	0.60154
ENSMUSG00000061451	0.46321	0.15811	-1.50559	-0.71505	1.90516	1.91874	0.59122	0.82721	0.19307	0.82232	0.96353	1.23204	1.14343	1.0098	1.22916	1.26875	1.0499	1.48496	1.36414	1.43869	0.98112	1.26493	1.21033	1.46129	0.99166	1.37309	1.33527	1.85885
ENSMUSG00000061411	0.5684	0.60154	0.16949	0.30094	0.92889	0.86402	0.60741	0.74915	0.49454	1.25124	1.139	1.14054	1.23556	1.14132	1.27556	0.90485	1.10819	0.06275	0.86582	0.07479	0.20463	0.60792	0.38354	0.20204	0.41108	-0.10362	0.02347	0.5462
ENSMUSG00000061410	2.07706	1.78993	1.10936	1.37673	1.58617	1.51726	1.64987	1.46111	1.48837	1.70119	1.85681	1.86963	1.72085	1.45807	1.60801	1.67676	1.68071	1.69147	1.86733	1.61779	1.62244	1.71344	1.79078	1.63522	1.14153	1.50775	1.82767	1.63487
ENSMUSG00000061374	1.06134	0.75989	0.84672	0.85661	1.27237	1.38069	1.13246	1.30526	1.26645	0.84697	1.16343	1.32841	1.0395	1.11221	0.73591	1.31706	1.36145	1.34422	1.18202	1.37428	1.21423	1.44174	1.55144	1.69473	1.37783	1.62918	1.63964	1.33603
ENSMUSG00000061360	1.54062	1.21272	1.55623	1.52214	1.24612	1.51504	1.33563	1.34218	1.60711	1.48897	1.26875	1.34626	1.18775	1.39897	1.27832	0.90796	1.16224	1.3145	1.46551	1.42031	1.38254	1.44372	1.44859	1.54079	1.51312	1.44901	1.41014	1.34121
ENSMUSG00000061353	1.58617	1.55284	1.18102	1.51726	0.82944	1.14486	-0.3019	0.08774	0.45105	0.32361	1.36163	1.37858	0.81664	-0.08762	-0.48696	-0.2966	-0.01924	1.91399	1.87784	0.58818	0.83839	0.72369	1.36235	1.24612	0.70402	-0.21381	1.26596	1.325
ENSMUSG00000061315	2.97511	2.72921	3.10826	3.02123	2.69093	2.827	2.52212	2.54281	2.68975	3.04388	2.72496	2.70781	2.6341	2.78775	2.74821	2.64854	2.7625	2.83071	2.78148	2.7625	2.65936	2.51846	2.70369	2.64983	2.74057	2.63654	2.56491	2.6317
ENSMUSG00000061313	1.36109	1.21932	1.10056	1.16081	1.94514	1.81486	1.33938	1.35645	0.76498	1.69705	1.31158	1.23738	1.32426	1.31365	1.21149	1.38334	1.38364	1.42776	1.55811	1.05457	1.63163	1.22087	1.33513	1.17582	1.02662	0.94232	1.14738	1.21214
ENSMUSG00000061306	2.6862	2.43669	2.5438	2.40697	2.57459	2.55088	3.18272	3.28347	2.5899	2.87665	2.77004	2.80653	2.84172	2.86782	2.81425	2.33369	2.40588	2.79968	2.62466	2.7864	2.75709	2.73296	2.69093	2.69355	2.68402	2.9182	2.79968	2.88392
ENSMUSG00000061288	1.46241	1.39768	1.09328	1.10191	1.6786	1.52103	1.69213	1.53562	1.28129	1.43464	1.51981	1.39987	1.38699	1.26234	1.38699	1.47294	1.61475	1.68941	1.90017	1.51683	1.7767	1.56734	1.53669	1.48795	1.56162	1.47407	1.49947	1.79507
ENSMUSG00000061286	1.35453	1.17086	1.39912	1.22256	1.60321	1.73651	1.43773	1.72289	2.16589	1.57085	1.32544	1.49277	1.29764	1.86246	1.72389	1.55705	1.68702	1.60492	1.49784	1.61475	1.57004	1.70367	1.40339	1.55298	1.7976	1.70478	1.3956	1.49687
ENSMUSG00000061273	0.67118	1.32014	0.83638	0.83764	0.86552	0.81631	0.90941	1.03361	0.54206	0.40084	0.59265	0.49454	0.67984	0.34454	0.25843	0.63993	0.40434	0.47645	0.23949	0.43813	0.50032	-0.1	0.22198	0.02347	0.08983	0.10904	0.36106	-0.20708
ENSMUSG00000061244	1.84159	1.66139	1.63446	1.66909	1.77168	1.61959	1.45916	1.40999	1.49674	1.54928	1.52998	1.45992	1.6611	1.69459	1.84947	1.90179	1.52502	1.57832	1.88136	1.89289	1.67781	1.56578	1.71521	1.59264	1.59327	1.48706	1.53264	1.60251
ENSMUSG00000061207	0.89758	1.56717	1.35822	1.39262	1.30663	1.53577	1.56946	1.65424	1.66748	1.28751	1.44205	1.49099	1.33632	1.5663	1.51178	1.49052	1.59165	1.45276	1.25781	1.09918	1.08039	1.1337	1.3266	1.48228	1.27908	1.31763	1.28688	1.20426
ENSMUSG00000061175	1.9615	1.36163	0.71358	0.94861	1.2129	0.74403	0.83609	0.59078	1.09182	1.25895	0.81938	0.70545	1.34174	1.13333	1.32146	1.31518	0.96135	0.99251	1.10028	1.40981	1.66688	1.2808	1.15275	0.94668	0.89758	1.03027	1.30079	1.13961
ENSMUSG00000061136	1.92524	2.03321	2.08371	2.04929	1.97302	2.05432	2.00796	2.01124	1.90964	2.01235	1.90054	1.83072	1.87628	1.93497	2.01847	2.1439	2.01828	1.85073	1.95654	1.91746	1.95797	1.97278	1.97432	1.89135	2.11857	1.96918	1.97278	1.99661
ENSMUSG00000061130	1.88741	1.62472	1.50723	1.42657	1.82669	1.74445	1.33178	1.39314	1.25598	1.39295	1.32163	1.28315	1.3234	1.38049	1.46636	1.65307	1.64302	1.61435	1.78842	1.58689	1.77338	1.56531	1.70547	1.61904	1.63298	1.58676	1.66077	1.64972
ENSMUSG00000061119	1.42918	1.55976	1.03197	1.46756	2.03626	1.95705	1.06259	1.28856	1.45694	1.4608	1.74134	1.65502	1.7767	1.57413	1.82516	1.27336	1.21232	1.46977	1.76602	1.00061	1.89204	1.37556	1.2953	1.21655	1.45949	1.55207	1.57846	1.42199
ENSMUSG00000061118	0.59211	1.1061	0.95776	1.06887	0.64305	0.99836	0.67331	0.73799	1.08688	1.10254	0.88458	1.13042	1.00061	0.78605	0.69757	0.25298	0.29341	1.06072	0.9339	1.02502	1.1151	0.83445	1.02623	1.22711	0.94104	1.04245	1.06205	0.86354
ENSMUSG00000061111	1.70145	1.70765	1.83715	1.91419	1.54373	1.7948	1.34002	1.52878	1.61842	1.83608	1.97409	2.04693	1.88292	1.99811	1.75371	1.41155	1.59909	1.49443	1.52158	1.35788	1.58003	1.46336	1.607	1.75835	1.47407	1.88461	1.59125	1.34872
ENSMUSG00000061104	1.88941	2.02387	2.01525	1.98266	2.10692	2.30128	1.98289	2.12448	2.27008	2.17697	1.93136	1.92751	1.91954	2.06971	2.0114	2.03796	2.02909	2.2489	2.26763	2.1978	1.95654	2.21858	2.41434	2.40247	2.3154	2.33679	2.06344	2.19512
ENSMUSG00000061099	3.42857	1.67493	1.51515	1.53339	0.4263	-0.26176	3.62226	3.65556	0.15614	3.68163	3.96166	3.91458	3.80046	3.43736	3.6412	3.72112	3.80046	3.52461	3.43736	3.62226	3.34633	0.06275	-0.32512	-0.06204	0.29341	-0.8376	0.31978	-0.05583
ENSMUSG00000061079	1.02958	1.41562	1.05597	1.01956	1.03267	1.12867	0.93251	0.93688	1.03445	1.14997	0.89962	0.94728	0.91637	0.95275	0.95072	1.18937	1.07852	1.01394	1.29299	1.15524	1.10843	0.80698	1.16898	1.11282	1.11034	1.03008	1.06021	1.05545
ENSMUSG00000061062	1.96104	1.84159	1.86396	1.85005	2.37059	2.30563	2.06649	2.0161	1.98537	1.96575	1.93357	1.87227	1.88309	1.84742	1.98642	2.15301	2.10182	2.21977	2.2227	2.17825	2.11741	2.02587	2.08963	1.96779	2.14881	1.98249	2.0202	2.06946
ENSMUSG00000061032	1.68971	1.52187	1.68396	1.63237	2.03856	2.07393	1.84412	1.93497	1.93636	1.6219	1.65191	1.73146	1.58156	1.5471	1.38852	1.36109	1.49767	2.02587	2.45341	1.75708	1.43	1.54896	1.63298	1.59015	1.71202	1.54943	1.54223	1.46355
ENSMUSG00000061028	1.825	1.81965	1.78567	1.83344	1.62536	1.71722	1.77922	1.75586	1.70778	1.7163	1.71722	1.69375	1.61734	1.60606	1.54879	1.71722	1.92991	1.88095	1.90772	1.79933	1.74995	1.59974	1.79354	1.9197	1.85723	1.86189	1.84348	1.8741
ENSMUSG00000061024	1.4632	1.03927	1.57004	1.26128	1.4404	1.37838	0.85488	1.14251	1.50017	1.43702	1.27984	1.20995	1.35728	1.39865	1.31801	1.13002	1.36915	1.42942	1.52251	1.56836	0.73269	1.40853	1.46201	1.59401	1.5468	1.70349	1.51197	1.44978
ENSMUSG00000060992	1.72832	1.62601	1.84393	1.82332	1.85984	1.88095	1.84568	1.84452	2.07465	1.74367	1.71394	1.8232	1.88924	1.85089	1.87806	1.83254	1.81518	1.98308	1.93599	1.87156	1.84864	1.74747	1.81977	1.7468	1.81348	1.91857	1.76758	1.79917
ENSMUSG00000060950	1.42902	1.79885	1.52904	1.39166	1.31485	1.37586	0.85935	0.80907	1.66465	1.15355	0.96584	1.12297	1.3143	1.6163	1.25219	1.22514	1.46257	1.4249	1.06113	1.23154	1.46809	1.43143	1.28751	1.40273	1.33989	1.40708	1.13942	1.16224
ENSMUSG00000060938	3.08758	3.00784	3.28347	3.15084	3.09289	3.27866	3.05407	3.09661	3.08758	3.37322	3.01355	2.98351	2.90912	3.13198	3.06321	3.00314	3.20697	3.03893	2.99162	3.03893	3.11954	3.15783	3.30306	3.30306	3.25569	3.2324	3.23758	3.25219
ENSMUSG00000060935	1.08039	0.96353	1.13774	1.25011	1.53322	1.76908	1.24975	1.36871	1.26931	1.27124	1.43394	1.36235	1.53592	1.16373	1.30898	1.02784	0.97411	1.00235	0.51769	1.20933	1.31998	1.06378	0.88837	0.94573	1.04312	1.54406	1.0802	1.17987
ENSMUSG00000060923	0.77308	0.15455	0.46977	0.5249	0.31978	0.27922	-1.87389	0.48252	0.33743	0.54342	0.92691	0.821	0.17078	0.24398	0.1429	1.03178	1.12063	0.81275	0.83349	0.32274	-0.01127	0.19307	0.80125	0.81166	-0.37415	0.4435	0.70876	0.99529
ENSMUSG00000060904	1.71073	1.5522	1.72329	1.58634	2.31844	2.50146	1.86246	2.01319	2.60795	1.80706	1.87194	1.73307	1.86342	1.80383	1.89235	2.04909	1.92653	1.95957	2.10076	1.83492	2.09568	1.87843	1.96237	1.94262	2.05191	2.09568	1.97409	2.1281
[truncated: 8,560 more rows]
