# Supplementary material for: Cell culture-based profiling across mammals reveals DNA repair and metabolism as determinants of species longevity
Source: eLife. 2016 Nov 22;5:e19130. doi: 10.7554/eLife.19130 (PMC5148604; doi:10.7554/eLife.19130)
Supplement: Supplementary file 2. — (A) Raw values. (B) log10 normalized values. DOI: http://dx.doi.org/10.7554/eLife.19130.016 [file elife-19130-supp2.xlsx]

## Sheet: A. raw values
Metabolite	Method	GuineaPig.1	GuineaPig.2	Porcupine.1	Porcupine.2	Chinchilla.1	Chinchilla.2	Chipmunk.1	RedSquirrel.1A	RedSquirrel.1B	RedSquirrel.2	FoxSquirrel.1	FoxSquirrel.2	Beaver.1	Beaver.2	AfricanGrassRat.1	AfricanGrassRat.2	Gerbil.1	MeadowVole.1	MeadowVole.2	CottonRat.1	CottonRat.2	WhiteFootedMouse.1
alanine	HILIC-pos	128102498	92142127	16884223	36154282	31477940	73044415	86805015	48254712	41544052	64531677	40984868	85071125	26854028	26178762	60552207	36324976	25048594	14627262	12642814	59878540	71500274	73700879
arginine	HILIC-pos	918906070	964163686	686328654	706827934	501453854	805047968	761630326	550865729	487710343	638162192	527371214	774501819	871222033	736218605	945585439	749302069	525519296	502271057	406726057	1147301640	1138761405	698359021
asparagine	HILIC-pos	21458639	27498349	11257119	14689328	10020051	21431694	31971517	15417423	12656754	11941782	10796041	32688431	9818549	14127542	45487835	25770706	16821266	13792744	12389772	63380188	53994710	20198175
aspartate	HILIC-pos	87015844	36832346	16435673	29548404	19457572	58771447	49051641	53781991	47506214	46049134	48332428	104608551	34370250	14468762	73388049	58555054	42580018	94724821	82279714	100499428	60938354	106232669
glutamate	HILIC-pos	410129688	731975544	297126100	537503197	281450335	337515422	657898290	559344900	545154733	413795997	361894249	740354627	298378782	334800237	581362291	543697335	346917494	339981233	255799907	615621124	591792752	426125045
glutamine	HILIC-pos	1262542124	1896575292	61741426	216719555	70640747	670583726	722372810	362902038	323338317	698902135	403771520	981047663	459612784	428360678	1686608260	800663134	583308128	217667421	106687788	1041338448	953602533	88221325
glycine	HILIC-pos	35743649	48656959	8209142	20037057	18481766	40202024	40542893	42724397	39234417	52542600	30269990	59029800	14217385	14563450	91054755	59194937	21818227	6599278	7846382	41886556	45331592	45197644
histidine	HILIC-pos	164026666	176413320	58327886	69386316	36185742	89646651	103020576	51057543	45752424	104985839	98453508	84877762	85910922	69254605	92393867	72044342	42517975	63001744	44365044	130569037	131789054	114115948
isoleucine	HILIC-pos	478082179	385611440	109107390	145473627	113920892	284031210	294479202	144621301	125626515	222228705	150688096	310112061	276558820	218647674	196805737	165993554	77073027	84827688	86369179	380552305	414182814	151146234
leucine	HILIC-pos	538787096	518967191	147659394	176822270	113920892	284031210	294479202	202960515	125626515	256798964	164564657	368606794	302808933	236767110	196805737	165993554	100920456	84816256	86369179	458988859	414182814	167547438
lysine	HILIC-pos	126047235	178682155	120276697	142493174	34998616	121099929	169841539	76367964	65464215	80830257	57300188	113653836	132121632	166766122	154825195	104149562	47199489	61128963	74343739	170722597	205193048	76561882
methionine	HILIC-pos	128046206	124316112	45110220	51500889	30481151	82818871	90866220	57224383	46607278	67562814	42716517	95740153	88483196	65392301	87973931	56233003	28530007	36945665	35851060	146356574	147943567	59203455
phenylalanine	HILIC-pos	525420334	472402731	126993047	151905090	124374381	200644742	187109659	170807914	144999827	250397853	170276714	229880181	228720488	210372587	216795109	136748983	109619297	116530404	117860854	268627568	234099123	189831522
proline	HILIC-pos	1978912229	2501695819	889458973	1616073867	1088248625	1722596301	1958056232	1172884522	1039486186	1368495090	1109990723	2692325384	2422833095	1833090204	1802045884	1481833208	873314169	1074494302	942355958	2927137748	2985662009	1848335961
serine	HILIC-pos	62703552	60907379	15799468	23472697	18654538	39165462	36474124	26439102	24667437	30026338	19278369	44231605	26529381	17104130	58479107	42401575	31608024	21763750	16031489	47875350	53105884	26150276
threonine	HILIC-pos	265742554	211798845	42676371	84357974	75463542	152863326	117112839	84929644	76903809	126401984	88312649	127395336	91005876	80114204	188573653	149638368	98680077	58572313	42612851	191136232	224589302	133706125
tryptophan	HILIC-pos	68356057	58938188	8451542	17501029	18173829	32102246	38837316	23668021	22353382	41024613	34952808	38202760	29102895	34617584	23429498	16160359	15613583	14702717	16112616	48373872	42631857	25873919
tyrosine	HILIC-pos	119859487	111598574	37476051	47872244	41003104	108695011	108223597	47426127	40214948	53210089	35797769	95878749	82153088	64592272	73630117	59132141	28243661	30142689	29886963	143332053	150966375	54059786
valine	HILIC-pos	299439639	233851280	73338487	92374066	75917458	172426935	196650152	90729054	78720708	166964339	100606029	188086891	174482404	139333863	140803736	106442211	58199692	69867041	69483581	258336975	289520656	107894436
acetylglycine	HILIC-pos	NA	NA	NA	NA	NA	NA	NA	NA	NA	NA	NA	NA	NA	NA	NA	NA	NA	NA	NA	NA	NA	NA
dimethylglycine	HILIC-pos	952586	1544538	37733	395057	461591	1173225	1182982	731006	639653	873468	494655	1447365	874863	632424	1259346	1182299	415140	358370	441827	2020840	2198064	1400770
asymmetric dimethylarginine / symmetric dimethylarginine	HILIC-pos	148495259	147982160	110888445	98470727	60508283	122834250	109166729	91201554	74704390	70286917	69037186	124530748	58628861	53411866	192078596	83026958	23465804	50293411	41959667	214402145	135780588	138742778
N-monomethylarginine	HILIC-pos	19121417	27028920	32745334	25487361	6615514	26262351	23368602	29278719	23732546	13375646	15224044	30857853	14239888	13590471	42359670	17211727	5070252	8346536	11867548	52299502	46618726	18100809
2-aminoadipate	HILIC-neg	1849780	3292182	225115	253110	362256	1104379	524562	423952	353707	394755	212406	827310	374388	234788	757244	715155	524014	194598	99759	1099464	752079	411778
citrulline	HILIC-pos	2430206	2656491	434872	501845	664054	1343694	1288847	602644	528464	1182628	625159	1072675	782085	773816	1710267	1560651	1013518	432876	376168	2842599	2296202	1185411
creatine	HILIC-pos	4589468041	5955063149	1901289995	4105837007	2264947316	3788517650	2416972524	1691727567	1621705408	3124186847	1111943124	1792360294	3811706732	2047092180	5119209478	5813100824	2108401255	845126459	1346127065	2569357553	2985104698	4265244653
cystathionine	HILIC-neg	594235	734173	87268	109317	69171	193339	286911	115377	92760	335367	932282	1533444	56140	138070	194243	192552	646382	388620	108267	532263	609785	281949
hippurate	HILIC-neg	7934	9239	8690	7074	5133	15621	8878	NA	NA	3531	NA	7494	8171	12359	6489	8713	5529	NA	2983	11344	8510	5605
homocysteine	HILIC-neg	NA	NA	NA	NA	NA	NA	NA	NA	NA	NA	NA	NA	NA	NA	NA	NA	NA	NA	NA	NA	NA	NA
hydroxyproline	HILIC-pos	88270926	62867550	3963046	15877627	10302730	29470841	17205830	16839708	16345140	42423015	38944690	57025085	7049450	8857169	61873723	39689169	20490559	7078628	3766019	39889553	41906537	34942243
kynurenic acid	HILIC-pos	382592	NA	980208	NA	NA	NA	NA	NA	NA	NA	NA	NA	NA	NA	NA	NA	NA	NA	NA	NA	NA	NA
kynurenine	HILIC-neg	25654	31755	5043289	661497	17224	47184	35170	29930	21879	44675	23145	54183	31578	40732	34627	30138	18839	20812	14174	71587	76316	38754
3-hydroxykynurenate	HILIC-neg	NA	NA	NA	NA	NA	NA	5562	2332	NA	3050	NA	NA	NA	NA	NA	NA	NA	NA	NA	NA	NA	NA
5-hydroxytryptophan	HILIC-pos	240763	NA	NA	NA	NA	NA	NA	188256	120832	124936	97695	108102	105380	NA	NA	NA	NA	129088	NA	NA	NA	NA
methionine sulfoxide	HILIC-pos	1393975	1998286	407459	645717	503209	1322141	1270613	861950	746512	790967	525784	1340364	1551637	1154394	1596805	1330382	959670	1298949	756109	2574589	4187693	760597
ornithine	HILIC-pos	1285592	4481756	2170756	6951299	642450	2805442	4423258	2816894	2214032	4640751	3765756	6150288	15471441	7090670	10163189	4355370	5105934	15370207	29638329	13244690	10643345	2479021
orotate	HILIC-neg	150195	1080454	NA	10008	36219	11905	1448378	160939	257722	509598	275299	1404843	537868	962038	1142694	894335	71230	259530	213416	83645	370179	201616
phosphocreatine	HILIC-neg	32459	20386	371579	708399	24134	7350	2011627	1392584	1397237	488352	3216572	11148124	77301	74660	1253483	934249	222376	NA	7005	162020	25998	192756
phosphotyrosine	HILIC-neg	NA	NA	NA	NA	NA	NA	NA	NA	NA	NA	NA	NA	NA	NA	NA	NA	NA	NA	NA	NA	NA	NA
pipecolic acid	HILIC-pos	3355668	5477624	2496301	4137193	2298089	5188308	3663126	3128852	2683181	3042656	1694618	4607462	2924746	2239791	5621344	5276130	1825324	3801454	2763467	9322679	9634992	5566885
quinolinate	HILIC-neg	9035	33401	23040	25497	16845	25375	30334	16538	20755	18307	14583	32233	15343	24224	30682	27249	26098	20480	13806	73613	52211	17835
salicylurate	HILIC-neg	9181	9845	6215	9249	11234	14886	11607	NA	NA	5403	NA	6406	10032	22345	8821	11561	11435	6053	NA	12795	10883	8448
sarcosine	HILIC-pos	59368268	82078042	23559247	52463207	30065449	51856861	34407923	21214247	21100238	36715573	12673550	22047099	53411712	27061729	69693926	77182146	27794980	10873432	16767332	28091903	35460013	55992467
xanthurenate	HILIC-neg	NA	NA	NA	NA	NA	NA	NA	NA	NA	NA	NA	NA	NA	NA	NA	NA	NA	NA	NA	NA	NA	NA
betaine	HILIC-pos	519917091	643391170	308377470	625384155	926003484	2511454387	1247380352	662730716	573938127	1002926175	472528454	993605330	792873681	428520493	1895292592	1498565472	254444679	1609346757	1436787459	2753871219	2596883750	1610951266
aminoisobutyric acid	HILIC-pos	10507434	46620047	2705255	6225339	3736860	9163152	5513268	1648915	371336	1268667	2496326	7955795	21654884	16531689	14051327	14073754	5142372	3181253	4869161	20422170	26900352	16613121
5-aminolevulinic acid	HILIC-pos	7752	10401	NA	5902	100484	239478	NA	NA	NA	NA	NA	NA	NA	NA	178682	92034	1269	7133	2295	26458	148738	NA
GABA	HILIC-pos	12371703	51745375	3130445	7193371	4443504	10312700	6501012	2197207	1987824	3092300	3551183	9352498	25838040	19021973	17039478	17016259	6777853	4059564	5604045	26807800	32817072	22861565
5-adenosylhomocysteine	HILIC-pos	2125201	1706064	1005810	1009924	815673	1376411	1528782	808765	560455	932812	1230374	2712703	2350439	1324257	1962695	1354727	628310	1701355	1240390	2499309	1993487	891916
glutathione oxidized	HILIC-neg	3153679	8150351	580319	1853669	1741616	1356023	651065	1224928	1041877	2814760	4904408	6023176	637628	359994	5002651	4524622	4095101	1686050	286186	1585516	1731434	1766638
glutathione reduced	HILIC-neg	69458787	80334545	6041057	16644628	41310584	55318790	11935373	23734278	22599854	28411585	47996822	60439496	29764973	13006119	25765360	27706748	36578368	37347787	9446891	53587394	68969129	13991728
carnosine	HILIC-pos	20507698	57526453	7454488	15251430	2631643	13924848	3132613	1107011	912217	1078719	556446	2092136	634581	1382413	25951922	86760819	9247321	90907462	16874604	7314241	5557028	291146969
adenosine	HILIC-pos	74547710	24236084	295661044	751960537	75654111	154065246	212563622	406826631	677957790	430078746	795834573	2154418729	1404312073	312969086	73509456	229406570	17636111	321868262	121383750	27821328	39776327	226557810
2-deoxyadenosine	HILIC-pos	NA	NA	10680	193791	NA	NA	NA	208847	275238	112218	860384	1513485	3023786	23688	NA	532931	NA	NA	NA	NA	NA	NA
guanosine	HILIC-neg	1240500	4629377	25177226	50085316	1597737	6633518	7771845	17837913	13640765	3610940	2967117	25164275	3346189	1785240	5826103	6911827	38562421	19518259	18590513	67622785	55509774	59066832
inosine	HILIC-neg	24672344	71028867	76696582	69107562	28333652	65875749	77233268	73517472	73589195	63819939	66985932	61143148	61950410	31892298	70719283	69055320	78598686	76468026	68991330	61672202	61853530	70192174
xanthosine	HILIC-pos	3418684	10462620	NA	3756677	3935524	7940138	101301	130341	26043	NA	568032	1453070	1436579	4359724	13521521	13177815	30195732	4086908	9017681	4630897	3264823	1898020
cytidine	HILIC-neg	3201832	9481562	2207761	6503814	4666180	11526369	7650742	5200979	4082924	1323887	296360	1904107	171851	85113	29362576	32621900	6620203	20441676	14651970	39088305	42930652	22749731
2-deoxycytidine	HILIC-pos	NA	177260	55472	44684	69094	659152	133908	748819	527937	71225	NA	234706	NA	NA	1308671	1614856	568422	2557626	698733	3705399	3395498	383337
thymidine	HILIC-pos	NA	NA	NA	NA	NA	NA	NA	NA	NA	NA	NA	NA	NA	NA	94444	98659	NA	NA	NA	342027	153634	92987
uridine	HILIC-neg	5688170	11666965	24034287	35721385	1947083	7770701	4198923	22806902	18711836	10717244	13694540	47158114	13709346	6083219	129874178	127015909	51777354	56537528	56895548	135584880	123532815	86992789
AMP	HILIC-neg	67145987	32132187	3644902	1775244	67883101	73808031	51444697	43549681	32503204	53453383	39935370	51533864	31385779	16629323	1480796	1501344	1143836	12038500	5961172	13324996	15491680	1160048
ADP	HILIC-neg	38641597	13169208	11399115	11056122	19910213	21417051	8613045	14992729	14524138	40081125	5669014	11604061	23407381	17270283	1150238	2777085	149983	6783206	5911449	273068	2872051	3230701
adenylosuccinate	HILIC-neg	925568	496199	11313	19040	407543	1342162	1611393	484064	546830	206400	466275	1432299	110557	136474	16672	10970	36866	78672	118780	165165	211815	11766
GMP	HILIC-neg	31920849	40872959	1337156	670097	24779608	34523710	23698245	20925271	16585384	14287629	12343791	30492886	15490790	12622026	1469653	565664	2988041	13015672	13358458	19080224	23728181	248464
GDP	HILIC-neg	6099976	5622191	1335936	1286941	2552549	2504152	1489799	2827666	2367729	3223554	851193	1518577	1992843	2456365	44822	250331	57838	854183	870772	35066	105176	643196
IMP	HILIC-neg	78514205	83725420	334874	353142	22984171	29330848	1858596	3808906	3287121	2850634	10545436	14360742	21290589	24187723	915769	1013008	2306209	12671608	23498561	3420643	6210419	467235
XMP	HILIC-neg	25529	21592	75321	43174	504168	256233	8590	11178	12681	16479	45912	49321	91584	248394	125585	17636	533975	101009	228081	190388	154027	38839
NAD	HILIC-neg	NA	11305	NA	NA	2180577	4084113	26914	2260566	2260237	2007997	7896	4665	2287303	1846809	12021	11308	211322	616956	1359778	362006	915704	15789
NADP	HILIC-neg	17583	45033	12200	54338	706692	1383444	1627	529360	443514	245780	25836	36812	285742	211862	81974	48085	159326	307975	371262	329597	562194	26374
cAMP	HILIC-neg	28527	26375	45221	71051	184021	136596	35905	51855	47677	38751	16698	38929	62804	47011	45221	60109	24930	33890	31584	66756	84382	17042
CMP	HILIC-neg	5683012	4257447	813572	1095409	9319635	10002708	4737559	1425516	1117854	1132331	1912557	3253682	2456918	1657366	712847	381000	887690	3823103	2785333	9402073	9482253	980093
CDP	HILIC-neg	674216	215822	24041	61897	382347	196249	100303	140304	135811	325989	39830	42341	302133	268938	3050	17583	1256	105675	67099	3409	50954	14173
UMP	HILIC-neg	49035256	57221183	3248015	874357	49746065	60924222	26061225	27405772	24772956	18278910	25011200	61017959	23839119	13899045	693195	454286	3332302	45308788	36897839	41708925	49224811	596708
UDP	HILIC-neg	11578656	8983503	1183215	1596616	17134108	20585031	4918290	4552886	4059399	8772040	567245	1108877	2938556	2634478	991054	2014211	59848	1562866	1439422	NA	252249	640221
dCMP	HILIC-neg	62451	96654	40365	71837	68727	111013	117110	58289	47323	105507	54730	155317	60940	22292	94249	94353	54979	212304	89589	362735	234472	52525
dTMP	HILIC-neg	34985	30679	21490	5741	56596	95088	19198	34986	36440	46833	100066	75721	116431	44312	1415	717	2153	26373	29076	97685	66806	1435
dUMP	HILIC-neg	NA	NA	NA	NA	NA	NA	NA	NA	NA	NA	NA	NA	NA	NA	NA	NA	NA	NA	NA	NA	NA	NA
UDP-galactose/UDP-glucose	HILIC-neg	14654792	10498431	1323463	2812251	6874605	5993097	3659572	7963349	6730799	5222518	2144363	545005	5887228	2396512	4350818	2312008	2314578	634768	1342756	2452600	3959661	1325433
UDP-glucuronate	HILIC-neg	3631320	5468429	1205301	1906375	2201762	1068140	6614851	574471	473455	985321	2263160	4942210	1002376	1774831	3850808	2819063	962039	8253	34447	268782	1007744	4179931
nicotinic acid mononucleotide	HILIC-neg	NA	NA	NA	NA	NA	NA	NA	NA	NA	NA	NA	NA	NA	NA	NA	NA	NA	NA	NA	NA	NA	NA
benzoate	HILIC-neg	NA	NA	NA	NA	NA	NA	NA	NA	NA	NA	NA	NA	NA	NA	NA	NA	NA	NA	NA	NA	NA	NA
3-hydroxybenzoate	HILIC-neg	NA	NA	NA	NA	NA	NA	NA	NA	NA	NA	NA	NA	NA	NA	NA	NA	NA	NA	NA	NA	NA	NA
gentisate	HILIC-neg	2512	9136	6459	9688	4485	9329	NA	NA	718	NA	NA	NA	6436	NA	18592	15430	14707	9150	7178	5561	6633	1614
malondialdehyde	HILIC-neg	23185	132510	20086	22653	59831	27824	116579	75387	95947	93211	34509	119546	225544	244843	174360	52151	364802	797893	163393	214883	546146	39106
anthranilic acid	HILIC-pos	NA	NA	NA	NA	NA	NA	NA	NA	NA	NA	NA	NA	NA	NA	22250	NA	862373	235833	444686	355414	547957	NA
4-hydroxybenzaldehyde	HILIC-neg	NA	9167	18830	32127	22086	15495	9738	NA	17745	11144	13064	17880	19437	21834	14512	20205	19020	28664	10354	NA	NA	12356
4-hydroxyphenylpyruvate	HILIC-neg	NA	NA	NA	NA	NA	NA	NA	NA	NA	NA	NA	NA	NA	NA	NA	NA	NA	NA	NA	NA	NA	NA
4-hydroxymandelate	HILIC-neg	NA	NA	NA	NA	NA	NA	NA	NA	NA	NA	NA	NA	NA	NA	NA	NA	NA	NA	NA	NA	NA	NA
vanillylmandelic acid	HILIC-neg	NA	NA	NA	NA	NA	NA	NA	NA	NA	NA	NA	NA	NA	NA	NA	NA	NA	NA	NA	NA	NA	NA
homovanillate	HILIC-neg	NA	NA	NA	NA	NA	NA	NA	NA	NA	NA	NA	NA	NA	NA	NA	NA	NA	NA	NA	NA	NA	NA
homogentisate	HILIC-neg	NA	NA	NA	NA	NA	NA	NA	NA	NA	NA	NA	NA	NA	NA	NA	NA	NA	NA	NA	NA	NA	NA
hydroxyphenylacetate	HILIC-neg	NA	NA	NA	2179	NA	NA	3049	NA	NA	4112	NA	3947	3229	4147	NA	NA	3076	NA	NA	NA	NA	NA
cytosine	HILIC-pos	241660968	315468681	120631114	270301420	175995668	294876867	315582167	214403762	188579676	121222325	61331694	130096681	9913869	7859546	776743939	797901935	259093414	604175591	458516990	806655424	748460670	726036000
thymine	HILIC-neg	36996	89090	154637	239385	46767	136184	136531	113785	72905	59018	132059	202048	175044	91506	548261	407603	95466	133130	105010	1264449	574532	344781
uracil	HILIC-neg	14197361	32268275	81794204	86823335	19274263	46996229	11791052	3645763	3096614	3629634	2546415	10188823	12885126	19341769	37255904	27136083	15202541	42600996	24300591	40346269	29466388	65047882
nicotinate	HILIC-neg	NA	NA	NA	NA	NA	NA	NA	NA	NA	NA	NA	NA	NA	NA	NA	NA	NA	NA	NA	NA	NA	NA
4-pyridoxate	HILIC-neg	46826	79198	4340	6671	124142	245104	26396	12503	15647	33814	10446	7671	86710	714216	57759	44820	102302	252353	191629	36208	75087	20630
pyridoxal 5-phosphate	HILIC-neg	NA	NA	NA	NA	NA	NA	NA	NA	NA	NA	NA	NA	NA	NA	NA	NA	NA	NA	NA	NA	NA	NA
niacinamide	HILIC-pos	7088794867	7983304273	5232792483	6543768898	1476056297	2039030530	6419858838	2639828371	458964068	3114594845	2514023387	8158912073	1797449468	191329093	5840235635	6479218677	2547260607	2818244544	742953239	4516084617	5488836856	4816730166
1-methylnicotinamide	HILIC-pos	266282	762989	NA	1525687	445354	698444	2905372409	359978393	315241004	9518950	8223302	9928471	238604	397392	6368853244	4930541899	62209324	758311	484263	12729999	9297233	16593720
folate	HILIC-neg	40387	65130	63155	55441	3947	25298	13098	4486	3230	1615	6998	39653	13097	6639	34628	81996	7356	4844	13995	32834	35883	22786
5-methyl-THF	HILIC-neg	NA	NA	NA	NA	NA	NA	NA	NA	NA	NA	NA	NA	NA	NA	NA	NA	NA	NA	NA	NA	NA	NA
flavin mononucleotide	HILIC-neg	NA	6893	NA	NA	NA	5204	NA	NA	NA	NA	NA	6527	NA	NA	NA	NA	NA	NA	NA	NA	7715	NA
thiamine	HILIC-pos	NA	21420	NA	NA	NA	NA	NA	30240	28274	16689	NA	NA	NA	24792	41708	NA	57264	NA	NA	368259	928295	NA
histamine	HILIC-pos	1018174	1170180	934690	958708	526500	992422	964543	674375	557856	709826	566292	895097	1037966	933843	1173955	833273	696440	541283	501664	1192239	1269255	797483
1-methylhistamine	HILIC-pos	116160	NA	NA	NA	528181	NA	NA	NA	NA	NA	NA	NA	NA	NA	NA	NA	NA	NA	NA	NA	NA	NA
adenine	HILIC-neg	192236	40382	1702348	7634949	402626	950268	418414	1008464	829179	624947	278517	935699	122963	143219	43572	225393	184411	590401	578374	1128187	1011581	842777
guanine	HILIC-neg	364	597	30166	57510	577082	1173420	1870941	3161460	2951247	2193789	874463	3366584	1128698	1081018	1109198	1172967	8746768	3114426	6062314	6499451	2052645	12683699
xanthine	HILIC-neg	11200482	26178081	26807067	28718379	11144752	17050360	430268	88801	57301	339764	2652543	6108459	10407171	13758388	70694390	62309744	35280950	49484241	44127653	25295120	40080623	8589820
hypoxanthine	HILIC-neg	49429498	72384962	70937508	75313562	29690408	72253726	72609305	69656289	62960767	19856979	33805445	67587835	68114225	47857848	66121192	69768614	66988964	71748586	80262758	72372718	74248079	79072593
urate	HILIC-neg	1574124	4067319	1936165	928401	2210829	871334	323939	21955	14626	92359	25457	89207	1227332	4244735	5635808	3475615	9314537	4083503	12612711	3031123	4528960	1843851
indolelactate	HILIC-neg	NA	NA	NA	NA	NA	NA	NA	NA	NA	NA	NA	NA	NA	NA	NA	NA	NA	NA	NA	NA	NA	NA
indole-3-propionate	HILIC-neg	NA	NA	NA	NA	NA	NA	NA	NA	NA	NA	NA	NA	NA	NA	NA	NA	NA	NA	NA	NA	NA	NA
indoxylsulfate	HILIC-neg	NA	NA	NA	NA	NA	80050	NA	NA	NA	29376	NA	NA	90816	28129	28418	64525	NA	34278	NA	332676	768210	148601
glucose	HILIC-pos	NA	NA	NA	NA	NA	NA	NA	NA	NA	NA	NA	NA	NA	NA	NA	NA	NA	NA	NA	NA	NA	NA
fructose/glucose/galactose	HILIC-neg	2627360	11474815	9713706	6685576	6465296	4336349	17631256	8156302	5932842	11349732	3425005	34672159	3590961	1754128	12659978	21028458	2812595	6465179	4938185	17124599	19543164	4106977
erythrose-4-phosphate	HILIC-neg	1284576	2279686	2277463	2228420	1003931	1189275	1942001	841361	675228	1823707	578603	5860599	1029926	701292	3699275	2628111	544977	889794	689596	5593783	5187416	864957
alpha-glycerophosphate	HILIC-neg	1416137	2756764	1563454	1554033	1973013	1197725	788036	864613	671907	829328	352439	1583315	463514	1702025	7466615	2208757	2145194	4451470	1036498	14253501	8418866	515605
pentose monophosphate	HILIC-neg	16476633	33504329	37622103	46905843	4554712	4094210	15877648	8463316	7783358	6764396	5302931	17518281	2360665	864002	32897549	28208352	2036882	3140311	3666736	13564815	16437399	11153287
hexose diphosphate	HILIC-neg	27531902	27384069	67160309	63443504	1096079	1141559	53911963	778522	1942880	8342273	44184076	69564632	1880205	657035	23531651	27007090	549067	309549	676093	8489606	13333741	7954870
hexose monophosphate	HILIC-neg	79365908	109410034	65469879	41678101	19488108	15912681	91864030	50156562	34848842	81855856	21345072	155040900	11734441	2492362	35669869	55160200	7186990	8319205	9317987	120887946	96809278	35451769
lactose	HILIC-neg	2896719	3207124	4340205	3140083	5836735	9502809	1907331	1903862	1517705	1804593	750680	1661584	2527059	2586139	967705	1877315	1196513	1594743	3172387	1514305	2409545	585128
sucrose	HILIC-neg	1365050	2579996	1775224	1419804	1942595	3226866	1551201	767134	635432	1088334	491305	2182406	3230893	1535224	595030	878382	1219524	1646891	1315006	933860	1295126	629213
glucuronate	HILIC-neg	3307703	2635585	452814	643436	1015419	1862490	3088286	468606	424955	704338	974454	2445219	1026228	772999	1001407	1122252	549797	2001120	1817474	2396919	1629987	2660485
6-phosphogluconate	HILIC-neg	97410	316233	56748	87927	56648	124306	115732	177458	151569	420977	45745	287207	170598	22579	198623	128722	22787	39314	50359	1157177	2111311	67970
3-phosphoglycerate	HILIC-neg	53479	37017	223280	250398	56046	140146	221519	96918	139303	214537	250653	68617	1263275	467824	9357331	326403	12252640	2557642	6478490	19344368	27562725	45945
carnitine	HILIC-pos	904862982	956112696	1567168342	2697510768	1055652153	3356907674	925982533	567852741	475106500	747374176	190262162	699772619	1564603431	555246833	3085688384	2604889490	1050081786	3267419921	1645422743	5098099646	5199562941	1936477474
N-carbamoyl-beta-alanine	HILIC-pos	955455	719281	522310	NA	NA	NA	483173	12716	31473	NA	NA	NA	NA	278669	NA	NA	NA	NA	453219	475624	201814	NA
pantothenate	HILIC-neg	39188579	42549179	4359001	6853153	19168090	35365713	6119064	25544639	20116590	23231934	8806653	28612977	20247406	14216313	43996412	34918898	3537463	14579987	7631397	43531708	48899381	21084358
putrescine	HILIC-pos	35822080	24404972	967901	4490292	37309937	29482107	4571147	3090321	2234235	10788824	3869294	14318347	29620020	15841752	28145807	35188376	20406594	18753513	10986032	71403131	56495265	21629071
spermidine	HILIC-pos	692122239	462790505	236633736	357956143	912407399	1071734240	467969163	593872300	647295193	508471141	674552721	483940754	955913184	1093776037	1313892774	1359172555	1221925134	1317916007	1508982188	1536909356	1223468857	1089417538
phosphoenolpyruvate	HILIC-neg	13260	6658	769704	1236990	289265	543072	223168	128931	227859	458260	511575	117659	2555281	1153153	14787386	758272	17147385	1461567	3494040	5875014	9105964	109969
trimethylamine-N-oxide	HILIC-pos	9149858	9157873	19182095	10207480	16883042	9066718	7747673	10570993	12668908	7403227	6495268	9521092	16451176	7192340	18169862	14924114	10126896	16373122	11871530	16179269	15053102	11147624
inositol	HILIC-neg	67636	111364	394091	586996	1436121	638187	390189	810575	639517	404963	74713	100032	94992	115734	454430	366610	191512	352992	498496	675327	537650	85007
allantoin	HILIC-pos	11108328	13382668	4104001	5670882	4989514	3604284	4405025	3218124	7158514	8973136	5169749	16124823	7301158	6569342	4389479	10842605	1321041	9699672	1602883	5456408	13499608	11157920
creatinine	HILIC-pos	95606520	262190163	51746983	150157690	58623746	191217448	101607028	76718060	65839392	43607130	29098308	136682247	77497651	65884692	214455258	311139755	58808964	52365556	52491426	119507695	148906787	101977683
pyroglutamic acid	HILIC-pos	16159906	17542715	6080212	9263939	2687549	3160832	4542819	3231645	4986652	5329473	2721862	12321424	15803162	8306307	14232945	62297831	1285181	627184	1048484	2175168	4071960	2325006
DHAP/glyceraldehyde 3P	HILIC-neg	55276016	49237004	37765909	48268956	412812	245108	20350622	434673	675631	2131579	23641912	27390667	1191945	1417730	15994319	17969637	1062700	386687	350103	6137281	8487571	12575851
phosphoethanolamine	HILIC-pos	16753607	57236855	31820521	51077626	1059495	6134408	3933759	35432234	33313041	7363353	2612963	10750268	8982640	3274316	26716636	27289244	22454915	83588842	42072036	41624246	42262896	20161062
pyruvate	HILIC-neg	118921	529346	NA	160050	99920	392513	NA	205773	110626	NA	NA	144061	313417	90997	297329	217098	159989	282011	244521	456000	485427	NA
alpha-ketoglutarate	HILIC-neg	354655	1044247	264676	298656	344812	418467	260596	306694	284450	241376	197837	337174	336684	428955	290961	365329	236101	277687	285501	308407	268852	249008
taurine	HILIC-pos	52556629	146431540	113799905	292942989	129806197	687322103	837588830	484287029	413506017	359472275	305410588	751573160	1967068329	867875250	2067020201	2732078379	1121174703	3271365358	1864377598	2935402656	3422642758	3168103265
adipate	HILIC-neg	144800	278582	94322	144110	99946	141402	134291	116266	87716	125644	138249	490762	132671	190802	292333	400393	140584	156555	159202	224744	239471	673494
malate	HILIC-neg	51868425	47810251	34264765	45727655	26970270	39894725	52768691	30432119	30936520	44359391	48852556	59450972	31641252	31966877	47733870	46390776	40750896	29856719	42737549	47313259	47266824	44761410
methylmalonate	HILIC-neg	329738	434199	275296	759397	428467	1804175	494037	574800	543573	7001263	598551	1469458	4059198	2642031	516435	673453	727790	632392	662439	12887214	8998122	31899623
oxalate	HILIC-neg	305409	563911	476426	472456	327059	330249	391091	273639	319258	426757	409095	589536	722684	531012	273085	275422	495018	255284	371451	650241	465688	308543
sebacate	HILIC-neg	NA	NA	NA	NA	NA	NA	NA	NA	NA	NA	NA	NA	NA	NA	NA	NA	NA	NA	NA	NA	NA	NA
suberate	HILIC-neg	NA	NA	NA	NA	NA	NA	NA	NA	NA	NA	NA	NA	NA	NA	NA	NA	NA	NA	NA	NA	NA	NA
succinate	HILIC-neg	14109342	29483842	6646969	13757625	32910632	51994902	24718688	29518142	22916883	20597714	11466970	21256247	26377321	23483850	16012920	8052379	21447830	20660754	19695786	21380788	17620542	5123559
aconitate	HILIC-neg	95023	296503	169500	90814	144681	155475	526620	114833	92072	71562	85862	341627	608660	375731	572164	670921	29534	25897	66302	63191	73665	736599
citrate	HILIC-neg	9556820	26118559	8990910	8184355	12734828	18691449	31541336	5944583	5141688	7860107	8612433	20874704	36159495	22694026	45463266	44955819	3084685	3313953	7208595	13812688	13625242	40699257
isocitrate	HILIC-neg	181043	346671	30480	246255	8678	10550	1010764	60858	56783	68900	110713	6243	349425	214701	1445605	1471371	65522	16709	13162	110738	88428	1302873
propionate	HILIC-neg	NA	NA	NA	NA	NA	NA	NA	NA	NA	NA	NA	NA	NA	NA	NA	NA	NA	NA	NA	NA	9315	NA
2-hydroxyglutarate	HILIC-neg	1566099	3395494	2950259	4483637	1513268	1134215	3303670	1920768	1863397	1373358	769836	2128692	1045440	2329664	1678402	1350747	805581	919683	662589	997285	1572632	1783169
alpha-hydroxybutyrate	HILIC-neg	NA	NA	NA	NA	NA	NA	NA	NA	NA	NA	NA	NA	NA	NA	NA	NA	NA	NA	NA	NA	NA	NA
lactate	HILIC-neg	28654589	46678329	17349738	22256901	16708850	30112551	39046792	47806891	49172449	50661721	16832407	43377527	53783554	40447704	22929452	19274401	7108680	31546879	29482154	15215398	31282905	5942926
mevalonate 5-phosphate	HILIC-neg	NA	NA	NA	NA	14222	9058	NA	NA	NA	NA	15545	19881	NA	NA	NA	NA	12373	NA	NA	NA	NA	NA
beta-hydroxybutyrate	HILIC-neg	19384	38402	NA	5562	8076	14824	19200	NA	NA	12834	13655	11017	12199	29375	18965	15931	9425	12903	6912	21379	37722	18336
fumarate/maleate/alpha-ketoisovalerate	HILIC-neg	9337493	8623178	5710936	8066206	4292107	7028165	8773141	4684524	4942696	7069672	8362496	10880100	5055883	4780823	8067170	7571392	6615357	4785134	7001723	8613123	8098674	7031552
3-methyladipate/pimelate	HILIC-neg	16917	44356	11879	19449	19612	18934	25407	14095	12639	15413	14774	46450	51282	29310	15519	8793	32438	60330	23536	35692	92043	15897
butyrobetaine	HILIC-pos	204597488	227555526	97560327	158454723	233572021	411621302	809481784	307458391	261533057	255424367	132508587	413588067	304084446	168959706	416450349	291178034	89989312	425639686	259854566	1005409365	944725399	518970442
sorbitol	HILIC-neg	177247649	213259352	179408907	231086248	14100408	32622001	52886715	49802558	41854171	117730471	187618225	203305434	38127374	29385066	7318284	9220922	4733729	10743039	13371921	17758728	16469664	44300369
bilirubin	HILIC-neg	62438	53826	34628	55979	178885	396887	50777	73922	63157	64234	37319	117698	24402	9688	143716	65668	31219	15251	64952	128648	117697	84866
cholate	HILIC-neg	NA	NA	NA	NA	NA	NA	NA	NA	NA	NA	NA	NA	NA	NA	NA	NA	NA	NA	NA	NA	NA	NA
glycocholate	HILIC-neg	30005	33549	27790	28260	24515	24814	49841	35984	47839	41662	40169	34664	35020	48807	60704	38467	50605	32295	43617	37855	43014	42892
lithocholate	HILIC-neg	NA	NA	NA	NA	NA	NA	NA	NA	NA	NA	NA	NA	NA	NA	NA	NA	NA	NA	NA	NA	NA	NA
taurocholate	HILIC-neg	NA	NA	NA	NA	NA	NA	NA	NA	NA	NA	NA	NA	NA	NA	NA	NA	NA	NA	NA	NA	NA	NA
glycodeoxycholate/glycochenodeoxycholate	HILIC-neg	261650	254093	54910	86478	95987	168448	57320	86820	37558	44911	37298	182220	33163	20211	110479	92445	35645	23302	53928	113913	76487	47309
taurodeoxycholate/taurochenodeoxycholate	HILIC-neg	8430	21157	12887	13456	15421	17461	11481	24584	24219	51924	9323	31772	32447	73081	12836	29338	14759	16702	19297	45143	76224	5291
chenodeoxycholate/deoxycholate	HILIC-neg	171882	167205	230248	360948	286065	259651	475625	582502	714189	586020	514017	432743	539928	747809	683110	585763	611922	477861	557180	575641	813154	730915
C14:0 CE	C8-pos	2816551	NA	2281679	NA	7127603	4638242	NA	NA	NA	NA	NA	2569219	8437571	5043510	NA	NA	NA	3257043	3726152	2423652	1699329	5934478
C16:0 CE	C8-pos	14404442	5047287	9317873	9813500	19486637	28950594	6134306	NA	NA	NA	NA	2195727	26820331	12050238	5930909	3747588	NA	10952754	59593426	15068483	18574185	6720000
C16:1 CE	C8-pos	21526742	5706652	14111041	12279785	49325769	39896079	19897217	8252758	4628875	12096449	10415807	14181745	56364610	27875173	10173010	10442315	9775418	21247664	59629751	25095676	29214395	26072010
C18:0 CE	C8-pos	14153305	5016416	10329132	10128652	17976009	18041866	8267491	NA	NA	NA	1941215	5574461	28393050	12590480	4290109	5419138	NA	7659418	31682277	13285032	11150630	6121661
C18:1 CE	C8-pos	59877344	22606410	42108389	45484236	78210261	97929066	33707179	8127040	8752774	4798767	5886191	17095978	134852475	77464433	13390735	18855139	6843682	27880316	139871978	76136650	52966426	25973081
C18:2 CE	C8-pos	29382500	6363574	13546883	18209133	49981407	43761030	20050597	4800580	4381011	10730236	9495317	9658525	73870967	32996552	7631690	8284553	9209079	30996379	182625148	28383383	26203770	27557575
C18:3 CE	C8-pos	5897300	1264256	2015288	3597679	11014253	8068399	4545472	2902059	NA	NA	NA	2567903	15308366	6543650	2514532	NA	1881418	7678789	33907012	4973418	4981195	4901964
C20:3 CE	C8-pos	12713345	4110462	15726411	14292383	30404170	54951616	7917713	6559153	5125259	8222431	8223405	10374406	40761043	28665555	5528587	10597739	5039611	11713287	37814622	25688344	15521406	8026651
C20:4 CE	C8-pos	28570514	6828121	18017717	18643704	91445573	117791955	20084877	6102303	5866865	10273817	8544799	12318984	58659935	22277223	7714518	10307400	9686756	18601649	73821803	34381066	22247236	20993714
C20:5 CE	C8-pos	6381767	1118627	6309815	8460977	21116650	20349534	4729946	2739192	2885381	3030062	NA	6612019	16880980	7108418	3339827	4472164	NA	4344295	11624813	13177917	5417076	4875773
C22:6 CE	C8-pos	13463477	5955042	78363572	49624550	47729146	97657838	45596944	4137778	4436295	3170675	4303705	8721882	41776753	11646062	7233883	8340792	3484735	10783412	74117150	22877978	20863307	7022218
C14:0 SM	C8-pos	202790605	261992558	147091429	142764396	170320856	232220662	69789124	155473220	154933574	91056502	79417356	192678972	109560688	73127290	123551675	144647238	83198962	127043216	83743079	182454010	230598491	115728787
C16:0 SM	C8-pos	1465832926	1552579473	1506067969	1486466814	1164667217	1405868862	968888468	1399183705	1342735103	1110788594	824058526	1277538453	1172891608	905978822	1265670671	1278111361	911816509	1436650323	1479482875	1212872469	1270779614	1229915266
C16:1 SM	C8-pos	192861397	221837634	281611168	302270807	264243595	332018118	249804473	247430059	218882617	169849478	122156861	217086187	367733804	261085736	371373917	374746306	191533886	118011589	207874544	248408365	347642138	218253304
C18:0 SM	C8-pos	130229105	159977942	114606069	136029743	114768860	222334838	124622895	234239060	197187937	128065263	97099595	288645770	74911366	52983169	315462966	369147857	138501680	250046913	210302415	225623813	204763703	161849203
C18:1 SM	C8-pos	128122828	96784489	136202909	152792518	211034279	216878719	239836563	199215154	203084392	197593646	197231346	245487862	150640146	115724889	165842101	163842372	159399996	60981029	49873884	179588389	162644950	115876385
C18:2 SM	C8-pos	11560532	12566671	10180342	13350125	14344804	17183988	7838575	12099248	11510195	10061047	14830764	19915556	10729683	8105731	11118473	12611460	16362495	14934130	23000768	8762256	11886008	16454515
C22:0 SM	C8-pos	1297626307	1435188860	1147693010	1162997953	1366206099	1376022478	1648331432	1018234983	907700797	583635193	576348379	1229706613	1547529221	1568764623	1247375193	1151749660	663758435	945956310	1156942077	1612175063	1603811725	1283389635
C22:1 SM	C8-pos	559782943	753169298	617508204	664005456	676430492	880894825	806465550	426151860	376692959	294064035	199168025	638589763	852607674	496386235	672583647	708317985	283085207	416546735	515233751	844856769	845309446	284474591
C24:0 SM	C8-pos	377047934	331328791	464074820	438820473	243271148	430314540	292203164	320135188	305087358	257032947	222064353	336474257	208120134	175762028	400599474	426384504	311291571	339162429	306720913	441723514	529828899	412930806
C24:1 SM	C8-pos	399757664	691274060	505153146	479650393	525799234	908702339	487413700	303990280	249341812	159441985	81862332	333385466	629485041	574196832	404259002	394296273	294087374	204006141	311441471	516156768	631307359	551693611
C2 carnitine	HILIC-pos	354460742	486877181	572620385	401412707	391914892	749212563	392628338	83613605	67978171	287279445	22839049	63993099	1363146561	696214912	463579735	420067506	107262621	299010346	88158679	819183215	1328156635	72882158
C3 carnitine	HILIC-pos	44746211	14568110	142296389	156633968	67773728	139323017	28765569	7070582	5266275	26538629	3504410	6316153	91236511	72855177	47432003	41174622	92650769	122714691	32042077	2302337324	1456315758	126427220
C4 carnitine	HILIC-pos	5021522	8262075	28139468	27432079	17075054	41741522	31476084	11493214	9131389	30050342	2170399	5452079	17313661	27494375	39397775	25782453	18605311	33465155	18244054	278036901	383615365	47696313
C5 carnitine	HILIC-pos	8750487	9104451	44889568	33654493	16258531	77102894	40258210	12502547	10665313	161558450	4449774	2083811	17219554	27510422	137970752	122304052	65279031	63719169	56363712	742289736	819312983	224731716
C6 carnitine	HILIC-pos	299387	275747	5982600	6524833	2261279	2256188	1280903	394967	317768	832173	53011	168790	4064572	2907839	3660750	1710336	1273192	3733161	1002710	11032805	11510477	427509
C7 carnitine	HILIC-pos	NA	NA	210451	270723	66935	70728	156978	25403	NA	348369	NA	NA	568544	905501	425237	212429	119136	358564	107663	668029	1864790	6331
C8 carnitine	HILIC-pos	NA	NA	NA	41795	18163	NA	177366	NA	NA	144039	NA	NA	235509	361743	302518	NA	NA	33226	NA	159250	257020	NA
C9 carnitine	HILIC-pos	NA	NA	NA	NA	NA	NA	NA	NA	NA	NA	NA	NA	NA	112659	NA	NA	NA	NA	NA	NA	NA	NA
C10 carnitine	HILIC-pos	NA	NA	94062	103622	39609	62086	96903	NA	10144	36293	17904	NA	41489	183264	265306	54777	22344	123272	35840	81616	183464	9093
C12 carnitine	HILIC-pos	NA	NA	423193	423160	93536	411889	471377	NA	NA	NA	NA	49496	200057	312892	1217223	296565	121899	239332	86854	492481	1110393	NA
C14 carnitine	HILIC-pos	405704	852630	1949490	1541458	672401	1854157	2860792	1541102	1589363	402678	25581	266183	2367968	2124053	12757481	3537619	2396970	2542211	596456	5381436	16734058	390419
C16 carnitine	HILIC-pos	4255752	12609954	6886759	5919626	6030671	10165633	14549888	12800990	13434441	2096667	529867	1416567	6470190	5747917	76014646	17146234	19479077	18937680	9348166	23794998	64932180	2971402
C18 carnitine	HILIC-pos	3514605	11458913	5330217	6229183	3842244	6701951	3932623	6509959	6621470	1810535	526663	1696127	5802112	5821012	25759653	4733815	10297315	4098885	7402711	6638541	9752327	1512246
C18:1 carnitine	HILIC-pos	3875951	8302453	3868928	3847445	4119959	6255079	18216436	4503634	5027528	2164441	189848	1064097	4062030	9887928	23640311	5739197	6282718	10683783	3212214	13950271	48217490	2074287
C18:2 carnitine	HILIC-pos	94640	174116	160841	204916	107347	291972	437709	23723	21291	NA	NA	NA	57102	418100	567058	301647	83796	336141	19608	417083	1754522	75982
choline	HILIC-pos	6399992260	5732969439	12160363744	10154191361	5632282106	8987044754	5876446875	8943329450	7833304917	5572349705	7402987307	10887720344	4631729484	4325568701	7671653845	7787343847	6818418502	11912464795	9276178138	8680419952	9191228609	6475696742
acetylcholine	HILIC-pos	163317	1523873	1384090	374142	350097	100975	80687	NA	NA	466106	247387	113883	1447749	1790107	146081	279877	NA	NA	754796	293508	NA	242444
cotinine	HILIC-pos	4616086	2921311	4175356	1829175	3890532	3792633	1712896	1366720	2774774	3627548	6280412	1624582	4051578	4539001	1708028	4477825	2034016	4901564	3585162	2684553	2647818	2799873
alpha-glycerophosphocholine	HILIC-pos	330811273	610151070	3915664804	333687916	112217355	537950102	1783411142	3541284422	3048721466	237793796	29717657	111809241	215671209	52092095	224645108	140486110	168866965	195720840	78736645	2861165093	4466792253	106854709
C14:0 LPC	C8-pos	7051262	8211505	13125793	14164537	12969935	35177992	20891600	27635296	26975462	8487963	13550581	43343538	NA	7241334	20241377	23417982	19284385	8075040	NA	42493689	67783218	16852432
C16:1 LPC	C8-pos	6750307	18163389	12041974	13627700	21327165	55560474	73096043	64387315	44368520	13338978	18960019	122374879	32815378	27504776	29309830	31808099	38779320	39420267	35271966	60418140	102649802	38621955
C16:0 LPC	C8-pos	140422975	282801359	246794714	243566828	193139324	589105729	282512490	290418054	252575573	114651433	116135032	542067387	225369731	121771373	387506060	381539435	406595093	285872270	430326107	489535262	611983361	241540819
C18:2 LPC	C8-pos	25707604	49396993	40326887	43378912	38791373	87789084	41284091	49016547	44113412	24627035	24453584	77085027	35271397	27106196	62403575	60024927	66720396	46383884	71269761	71840934	77740919	30191277
C18:1 LPC	C8-pos	34025092	69675820	53927751	52921775	74918360	210439565	158987854	88516213	66154852	28930971	35903720	197268752	88860971	64131917	117181181	130949723	117279279	136795771	131928213	171622770	269218266	114903972
C18:0 LPC	C8-pos	177088259	385195855	369583014	346153314	358209378	915152826	343164793	484436492	414740440	175506537	138961620	571223929	324773469	187366391	508291847	541763408	670947965	390130021	325835754	677184642	837155165	400661340
C20:5 LPC	C8-pos	NA	5907558	NA	NA	NA	4543172	6759222	19948516	14578624	NA	NA	10559295	NA	NA	4914133	4538977	4188354	6270839	6448313	6280195	12619581	NA
C20:4 LPC	C8-pos	10657014	43958268	18451138	17459070	18891262	64154028	29575800	64651968	52475408	14734981	16395565	65734650	18312974	8014243	25203167	31735929	35732712	39356394	47744188	37740969	83203506	19674816
C20:3 LPC	C8-pos	NA	NA	NA	NA	NA	NA	50736443	19250642	13655519	NA	NA	NA	15894456	18347060	NA	NA	NA	NA	13640561	NA	34100088	15485210
C22:6 LPC	C8-pos	2541057	20173821	6436065	7853429	9634722	27427906	20044125	24654117	19160568	3844163	7947066	25316883	6628212	4491041	13250148	12899770	14524140	15009697	22632269	14700531	34368285	7323925
C32:0 PC	C8-pos	634742146	804496763	784601141	895590615	875509072	1199159451	974409908	803120359	733610006	543171627	588863524	1069801771	758159350	660671454	1087071226	966849697	931298957	673225813	869942852	922231072	955977137	556485664
C32:1 PC	C8-pos	788537396	841053114	899842342	926825856	1129533415	1274053047	1455847209	1114222673	1054744198	954749405	1000803508	1499253204	1434951707	1229228731	971197935	976478218	860494248	616915924	660052279	1206744911	1287726291	1043009680
C32:2 PC	C8-pos	95204165	103688194	80069746	74064017	217908552	192932060	399180600	249277839	253639890	195745582	182356542	469818075	292960406	295528609	115644753	149763597	99570436	103483659	57879055	256779498	314107753	194708990
C34:1 PC	C8-pos	1328815874	1258698159	1391058378	1449467652	1224971708	1346828008	1492213444	1190108679	1096084893	899162942	1020463671	1584828401	1622862611	1496953779	1530551623	1332258687	1167867596	1093041533	1364094166	1549754112	1534566945	1320078168
C34:2 PC	C8-pos	810370087	879255596	749187663	811265302	904505149	955017103	1340175286	835078723	761587582	619087955	638351657	1209636533	1321218938	1242246028	847211287	819037824	543542782	653307554	697863014	1077188392	1103359950	977290708
C34:3 PC	C8-pos	121626013	120611743	124474948	135970613	191075335	180761148	304548233	188258574	183439678	182831254	215858075	332269978	320364860	321556127	149122020	151321706	135743929	93304974	84666962	179933561	187667580	248069313
C34:4 PC	C8-pos	51726957	81924271	77429108	84884144	81993080	136325189	113388658	144225120	129094792	108489506	99458569	238005086	104749295	91610887	97877161	134265479	90892386	50513131	29854619	192182020	291320133	84963912
C36:1 PC	C8-pos	929660371	826103692	952888340	890767322	823927467	988890198	809020548	685533713	613811956	465781492	419376846	813090406	1103389265	933041421	693471388	665956095	505940928	415233991	666974236	1170541411	1241689773	912489247
C36:2 PC	C8-pos	1065825075	1043754671	900702097	870697509	1026960308	1036750705	1323248881	818981609	733032284	508981887	467314748	1032021707	1334972798	1320817809	941257785	815728916	550506631	703007840	883630270	1134617202	1186766796	1113287326
C36:3 PC	C8-pos	576743140	1011441178	581673680	882469462	740697997	1038553521	748347593	580901046	494023748	364111998	363017616	932639843	738222169	475679436	827551389	905023024	559788711	541858514	781520348	850548379	1040036897	406479893
C36:4 PC-A	C8-pos	52536754	162867885	86632794	84433173	78381478	146644558	90327964	164219452	144482293	132671909	89144694	276260169	115087754	49416283	158470194	184401541	149322982	116213484	117530676	262888018	333587934	106848671
C36:4 PC-B	C8-pos	641650973	956574397	756264958	859533590	684172964	906484955	649807750	620049160	563460095	495109696	520973507	946774390	672831708	468439726	762566789	807118031	693121460	612660636	756586439	805956866	899888037	574057680
C38:4 PC	C8-pos	644076841	927954631	727735797	895529805	807674423	1113327030	478898923	654043294	586742566	372760993	395895247	811464352	580298576	565422636	739448549	773964204	703776412	512999699	570196633	746312176	816511685	640923300
C38:5 PC	C8-pos	625934708	948972134	817961868	916155867	779117095	949436703	610064073	655918291	565929677	383418236	458487889	1029451477	567741126	337605583	737366067	788119239	656975213	662221564	878312707	814053832	881427798	620071832
C38:6 PC	C8-pos	276959218	491366716	331093505	384754876	347978850	384012558	270973422	238281363	203929129	212689507	209409048	466935385	305428872	135607059	349459014	366538389	272721782	274989394	387631996	420474583	399728392	287855347
C40:6 PC	C8-pos	243163696	361570458	294883341	276493048	412888823	479350508	124323204	144459981	137199338	105740179	112051405	193397133	267950608	95472364	245454136	228166496	259506935	181598707	212454108	219021166	223112150	305809039
C16:0 LPE	C8-pos	12962521	19049432	20195892	20096169	13853359	48935025	25480190	13397121	8343736	13672027	9027567	28195845	38826340	14946091	34335051	27318405	27569045	32626079	39763528	49104149	84618907	43291091
C18:0 LPE	C8-pos	9448766	16745725	15994786	11680935	20383218	17678584	46121699	29129282	22521754	11432188	6972365	20161063	15592490	17742223	25167506	24491532	18958678	11032745	13562710	27376873	36281536	10347377
C18:1 LPE	C8-pos	17186764	35073677	24860421	33207252	26175120	88166342	94385856	34032306	29239658	13593828	22104188	78175395	66228984	50386654	47449897	45828000	44841606	67931830	62817629	66080518	132936625	53658436
C20:4 LPE	C8-pos	9262564	39551290	27470421	26081519	20510180	47106332	25916044	46544804	33550054	15294573	10063829	39048981	20595670	12776553	48734346	38103204	51586774	67848841	50424300	63471216	127849939	26094025
C22:6 LPE	C8-pos	58588456	131632550	134786816	116427852	132626869	367453773	141561473	169965069	138971432	57532029	41996724	207586729	124584743	76321832	180226177	193936871	251589240	130560041	113259026	241447065	337807904	148608211
C34:1 DAG	C8-pos	23180728	35581777	41769294	43766157	42108285	42252504	38258771	26925991	17757536	22210353	25848958	44718138	42564076	31406084	41709667	40682174	28891428	27814510	49817941	45566136	59274568	29893029
C34:2 DAG	C8-pos	6607021	12390730	7601016	7836056	17012834	13247562	15465493	13002625	9140013	7562479	7104843	15914073	10327655	11157061	8783354	7986072	5379424	8442301	8184939	10619459	15623286	10182888
C36:1 DAG	C8-pos	29166395	31145949	22642500	27773601	33284781	33226219	20681052	21459352	17543896	20589040	21865176	24451894	27447915	22285208	22207053	22127069	19678891	22144186	16665180	32512571	33157562	26393003
C36:2 DAG	C8-pos	12799353	20808820	13754554	16832517	34384225	30468561	22032708	14283571	12117091	13213346	12311285	17396744	18633925	18921581	13718784	12701388	7476222	20638656	19432198	23578339	31726075	16326471
C46:0 TAG	C8-pos	31131214	28566561	18217506	19876955	14297995	12128278	28637408	9939312	6236698	13176737	9411290	15947183	23808787	10928526	20055056	16247291	4876743	2711812	NA	27390865	32585703	11739744
C46:1 TAG	C8-pos	43543231	61377355	NA	NA	18190598	NA	34398536	20225185	16158895	16542779	21812707	32473413	21172590	12533609	16932912	16029063	NA	NA	NA	41968580	41196476	16382872
C46:2 TAG	C8-pos	22130307	31892214	NA	NA	NA	NA	23753735	NA	NA	NA	16619347	30544707	NA	NA	NA	NA	NA	NA	NA	24026142	18242572	NA
C48:0 TAG	C8-pos	48327129	32738605	28415099	31429125	10128462	12707870	17280851	12833609	9725595	21745450	11505967	14743795	51888310	18733467	27293289	19851075	6748880	8925260	11585321	37803781	42183900	23521573
C48:1 TAG	C8-pos	101875874	134171709	33454973	38992365	21996931	30517273	65111518	34482882	28500263	34846461	39162042	57030673	59138895	37822606	45497634	34976350	16534684	8886315	11810807	101561634	84609959	37717485
C48:2 TAG	C8-pos	50033006	108453377	14053980	14850409	13743871	14494839	50387474	21149465	15345477	16772885	27841061	50821638	25253664	23882234	16950927	15056962	9185441	10040717	8442474	51214440	38694694	19508269
C48:3 TAG	C8-pos	28588823	38693722	NA	NA	NA	NA	NA	NA	NA	NA	24221621	55850280	NA	NA	NA	NA	NA	NA	NA	NA	NA	NA
C48:4 TAG	C8-pos	299765273	233624066	469230603	411520769	207592317	358477374	178637629	462963562	408285033	283303623	180446170	380590206	206825396	140015738	451490547	360878778	191983034	255895871	215480781	485498295	420885847	253417769
C50:0 TAG	C8-pos	35954821	21839880	23369138	28297290	7968076	10551349	9784237	5015669	4564153	11321824	5118495	10565452	28682143	11998065	17338777	13821007	5881126	5406705	7937768	24614002	20474090	13390808
C50:1 TAG	C8-pos	181311907	173327809	94989218	104892192	38710679	62386453	84405459	36617556	31988653	41967629	42223999	63023592	133787164	79933156	89329867	60551761	35376712	19948529	46053273	172172119	134684442	72864829
C50:2 TAG	C8-pos	134897568	210279263	38921151	43607929	31611136	41145853	107284962	34670174	31648783	31401194	52710569	80235239	63546718	75887155	44026611	38504360	23754775	20238793	19979219	140664774	85434208	49708418
C50:3 TAG	C8-pos	45342593	113637418	17145313	16673548	15498819	15362750	47571305	18531348	15507709	14361591	28330334	50669715	21591822	30279931	23167994	19926556	NA	12495098	11616225	54125830	35668946	20080462
C50:4 TAG	C8-pos	31690037	58955379	NA	NA	NA	NA	NA	14704559	NA	NA	37402813	56184986	NA	NA	19722904	NA	NA	NA	NA	38037926	25845523	NA
C52:1 TAG	C8-pos	114678397	119368256	63532570	80921496	23317936	40109322	36409348	15448474	14677726	15176590	14108370	27934069	48565309	34454676	53674524	31588857	20065143	7980321	20341967	87195290	48274098	32692930
C52:2 TAG	C8-pos	233025440	286809035	91552958	102923619	60151179	93210465	146791295	37928189	32312179	33548687	51945768	78220599	99759542	110597485	70155013	54243094	46146989	38040573	60708895	187404863	108390155	77659989
C52:3 TAG	C8-pos	102275742	201527131	38240950	41877003	30256080	45180333	84078938	24700973	22951354	16603837	35828361	57652763	42527244	76453973	36475777	28332886	23354117	26375861	34051815	107031143	58973301	34265005
C52:4 TAG	C8-pos	54661944	151531017	16011171	27257991	14832964	27472071	15622927	7728798	7390466	8008460	19479367	28616934	13746068	20463241	27165493	25636631	14450680	7951513	18416940	62699923	37205107	12250863
C52:5 TAG	C8-pos	57899563	121794640	29024007	26188811	11109004	29918255	NA	11756540	8408398	3305733	16061894	25589102	12793366	11558531	29717689	29873086	18180646	10870080	11486551	36370784	26308465	9914059
C52:6 TAG	C8-pos	50898127	103442226	26883647	23856381	17185948	27129376	17312181	12938611	12652080	NA	11636482	27910076	NA	NA	61994319	40462278	20840000	7451716	18120564	39746599	39529168	10241049
C54:1 TAG	C8-pos	39044689	31408873	20636422	22643189	8050231	12475979	10888369	4979936	4923271	4947981	4424099	5730787	11846474	8695463	14264025	7489060	4943698	1697649	4115711	29245837	11466521	6195229
C54:2 TAG	C8-pos	125418030	156701699	41796532	49059411	22889190	40084783	47560372	10275974	9649458	6567937	9806561	17966368	22818679	30617457	23979614	17179990	12475297	6210881	13407506	77883018	33811266	19668960
C54:3 TAG	C8-pos	144533261	213564347	50016077	54069819	37916638	73808417	90562337	17520320	15068030	11717007	25327668	32776729	44378409	70872499	29923799	26554413	18553585	31060998	30051902	102614432	52405076	29653931
C54:4 TAG	C8-pos	96532754	202579078	53186699	58005488	27395830	58410666	30173106	17233569	12736165	12118664	28010146	30156609	33366367	40777054	34698648	30285095	16218783	23109147	30810284	71371442	41953818	17409231
C54:5 TAG	C8-pos	102740051	231080698	64649953	76766265	22007737	60764119	17352934	20090912	16997644	11548227	29009983	39983599	26677397	23880934	38543171	39289673	30183739	24010298	31185915	71748297	46799160	21022083
C54:6 TAG	C8-pos	100858235	268643976	54115124	55940725	25032454	52039905	14581808	20286866	18891883	15185023	33168818	53613071	24293632	17731142	45471620	38847996	25202958	21575985	29679457	61256410	44103398	21139763
C54:7 TAG	C8-pos	58413419	160066979	26245076	25771054	23288053	32728408	22695909	14738944	12263966	7252576	22294346	48217561	10898727	11374331	29735140	23607788	20051552	14233184	16454620	47895199	43070559	11649052
C54:8 TAG	C8-pos	19196206	60033181	NA	NA	NA	14313057	NA	7299869	NA	NA	7764495	20222888	NA	NA	NA	14230783	NA	10722872	NA	17922614	9841027	NA
C56:1 TAG	C8-pos	14459918	14012595	12091705	10660785	NA	NA	3721058	NA	NA	NA	NA	NA	5321740	3391928	8799678	3880571	NA	NA	NA	10895783	9546179	NA
C56:2 TAG	C8-pos	40293953	44418766	14099698	17615344	6585167	13608734	14676312	5644932	4157401	NA	2858718	7913041	6408403	9988366	7644304	5685839	3350735	NA	5758944	20786161	11284002	4438277
C56:3 TAG	C8-pos	49625808	70241846	NA	NA	NA	17484775	20242237	NA	NA	NA	NA	NA	4677328	9965449	NA	NA	NA	NA	NA	20331160	7731168	NA
C56:4 TAG	C8-pos	70629255	157023973	44667390	52206213	18412987	38971086	16910366	8076842	7174903	NA	10456101	10347286	24974719	31402560	21836376	14895639	10649880	11501487	12288562	38009840	17589564	16631373
C56:5 TAG	C8-pos	117209128	257290474	82957779	89357510	26068611	80954309	10923196	21382107	16728209	11595786	29483208	36128940	25362829	20279950	41157846	37892117	25880094	28302478	35536329	67991985	37468507	22748933
C56:6 TAG	C8-pos	142684304	353429320	85014656	106667247	35003230	100615741	13943990	17821177	18807969	14705957	38221456	39720856	25797813	22190240	45786452	48240061	35118673	30178783	47047570	70394317	43520496	22893336
C56:7 TAG	C8-pos	120455290	326599787	68928933	69528490	30185818	71132839	24893284	21430365	20456438	17824236	41527181	60517366	30280207	28718748	41280939	42283931	31581286	40950224	41967302	59345541	39824317	25881280
C56:8 TAG	C8-pos	45167209	138688583	23034128	27625574	15759024	30667754	9708792	14704709	16320876	17006360	29572006	45302075	18443783	16658920	22193017	17361208	16707291	19407319	21355317	26818130	22114546	18078550
C58:10 TAG	C8-pos	14806298	51312343	12635232	14185087	5013240	22100434	NA	NA	NA	NA	6618508	9194711	NA	3949665	8470255	9877864	8110401	7020235	7563715	10647369	7576038	4770581
C58:11 TAG	C8-pos	9595851	38224771	5649018	7799379	NA	10032122	NA	NA	NA	NA	NA	7213554	NA	NA	5358285	6455584	NA	NA	NA	NA	NA	NA
C58:6 TAG	C8-pos	117240048	232143670	59037635	64340854	21542540	70288372	4978013	8050430	7490501	3170123	12199984	15687624	10311978	9438823	26598698	26865834	14363286	12946809	22393242	34581367	18619042	8832738
C58:7 TAG	C8-pos	119593081	326668320	63452908	67609181	28056869	101116521	9623953	11891775	9450137	6296290	18690234	28192284	15443519	15121545	34753505	32923844	18968960	25771261	32552790	41458667	25210418	10029720
C58:8 TAG	C8-pos	47415537	175430364	27815622	30253267	12142998	50578546	4721984	5831936	4177754	1407784	9526262	14115420	5969025	6964221	14783566	15027863	10744889	16657403	14599119	17938078	11947494	4516185
C58:9 TAG	C8-pos	21211210	85031542	18265986	19252215	5554461	27227897	NA	NA	NA	NA	9411009	10537387	NA	4117042	10147801	13542983	11407554	10375827	12572235	12250972	8328918	NA
C60:12 TAG	C8-pos	13077143	52018181	11204082	8980867	NA	15863312	NA	NA	NA	NA	5280942	10891878	NA	2781912	7005926	6927742	NA	8177334	8942916	5892375	4583408	NA
Internal standards	Method	GuineaPig.1	GuineaPig.2	Porcupine.1	Porcupine.2	Chinchilla.1	Chinchilla.2	Chipmunk.1	RedSquirrel.1A	RedSquirrel.1B	RedSquirrel.2	FoxSquirrel.1	FoxSquirrel.2	Beaver.1	Beaver.2	AfricanGrassRat.1	AfricanGrassRat.2	Gerbil.1	MeadowVole.1	MeadowVole.2	CottonRat.1	CottonRat.2	WhiteFootedMouse.1
thymine (d4)	HILIC-neg	4007431	3392224	3702983	3734922	3979644	3501264	4060435	3890776	4090129	3859717	3974753	3861041	4294829	4227153	3737894	3586392	3699929	3943556	3741362	3977518	3709948	3611400
inosine (15N4)	HILIC-neg	729140	792270	773183	811363	841519	600391	1173879	1046848	1267307	1544711	1344367	836185	1085439	1501715	1012315	1021756	1130544	1151232	1196604	847965	913772	1014086
glycocholate (d4)	HILIC-neg	1861923	1823693	2062498	2055734	1985919	1626458	2882150	2372906	3096227	3186182	2929423	2351196	2602362	3273005	2463147	2603964	2575075	2654093	2459157	2149117	2488523	2528357
phenylalanine (d8)	HILIC-pos	67748744	63978200	67495900	66091970	57456588	39482501	39816921	62621037	65876959	71402156	67612832	51852871	61932057	63315800	61026120	51161021	66254581	67243142	61963022	40857884	30472677	70838035
valine (d8)	HILIC-pos	20766089	18172754	18873611	18564754	17848956	16446787	20418883	18834380	19898256	25358739	21500155	19227282	21371181	20630605	18656221	17431235	17114701	18484915	18332838	20458672	18442740	20321262
C24:0 PC	C8-pos	511553872	469284139	522151557	522799830	452724728	482626327	496338440	490082041	477697053	451739363	423521693	519811864	555866024	474713859	515286479	472316084	491122807	457287740	504783297	461273854	454580842	505792817

## Sheet: B. log10 normalized values
Metabolite	GuineaPig.1	GuineaPig.2	Porcupine.1	Porcupine.2	Chinchilla.1	Chinchilla.2	Chipmunk.1	RedSquirrel.1A	RedSquirrel.1B	RedSquirrel.2	FoxSquirrel.1	FoxSquirrel.2	Beaver.1	Beaver.2	AfricanGrassRat.1	AfricanGrassRat.2	Gerbil.1	MeadowVole.1	MeadowVole.2	CottonRat.1	CottonRat.2	WhiteFootedMouse.1
alanine	8.21907	7.68877	7.4145	7.48687	7.81525	7.75717	7.76018	7.77229	7.78863	7.8327	7.94354	7.93072	7.45414	7.55683	7.48907	7.31512	7.49578	7.18696	7.16125	7.42052	7.64467	7.80746
arginine	9.1679	9.09296	9.14218	8.88417	8.9116	8.87977	8.7603	8.91168	8.81923	8.72244	9.08429	9.06017	8.8375	8.96256	8.64413	8.46509	8.72284	8.68414	8.69858	8.80764	8.71078	8.78268
asparagine	7.29688	7.30358	7.299	7.14384	7.17801	7.16986	7.44505	7.40013	7.27637	7.17331	7.39129	7.67949	6.95841	7.28294	7.34628	7.13683	7.26835	7.14309	7.15032	7.47401	7.4853	7.23574
aspartate	7.95698	7.40792	7.39275	7.46697	7.59496	7.6924	7.59469	7.81975	7.84565	7.69094	8.0189	8.04428	7.57628	7.29662	7.59639	7.51296	7.75462	8.10488	8.08915	7.69486	7.58196	7.94327
glutamate	8.80817	8.98978	8.86253	8.78533	8.71881	8.48372	8.60099	8.9629	8.87141	8.47161	8.94572	9.01207	8.40085	8.66677	8.43469	8.42889	8.5515	8.49016	8.53053	8.42288	8.4393	8.60752
glutamine	9.2582	9.26232	8.02136	8.38403	8.13439	8.65271	8.72402	8.69068	8.57475	8.76028	8.96545	9.12954	8.64298	8.69664	8.86502	8.58633	8.77847	8.37333	8.20459	8.71211	8.63816	7.83147
glycine	7.44867	7.46186	7.17174	7.28418	7.53739	7.53346	7.56363	7.71681	7.75754	7.77452	7.84282	7.83755	7.11324	7.29029	7.76329	7.53491	7.4046	6.79828	6.90053	7.28712	7.35519	7.60877
histidine	8.32593	8.10148	7.96901	7.82367	7.85666	7.93121	7.87237	7.77853	7.80444	8.01889	8.31996	7.88164	7.94785	7.96202	7.80003	7.65533	7.74354	7.79735	7.71938	7.79583	7.80853	8.01406
isoleucine	8.87783	8.57936	8.21933	8.19771	8.29843	8.3357	8.30429	8.24801	8.12321	8.1159	8.60176	8.61726	8.3708	8.50495	8.08506	8.07227	8.00768	7.98086	8.11304	8.31878	8.23862	8.19245
leucine	8.93012	8.74399	8.51737	8.32853	8.30086	8.33589	8.28455	8.39786	8.11804	8.23561	8.6181	8.67687	8.41443	8.53784	8.07702	8.08857	8.14252	7.97886	8.12974	8.34884	8.23008	8.22361
lysine	8.14667	8.08315	8.35975	8.18038	7.83918	7.98986	8.06879	7.93501	7.91368	7.94293	8.10776	8.0987	8.07957	8.34719	7.97469	7.85076	7.81381	7.80196	7.98456	7.87716	7.96299	7.81271
methionine	8.18023	7.83821	7.88816	7.65889	7.77677	7.87084	7.80924	7.84932	7.834	7.87983	7.95715	7.94559	7.96837	7.92576	7.74742	7.50028	7.56951	7.56036	7.59409	7.85697	7.86894	7.69645
phenylalanine	8.91171	8.6457	8.41167	8.25099	8.41235	8.29868	8.13878	8.34718	8.20352	8.17937	8.66422	8.44905	8.25698	8.46862	8.12003	8.01743	8.16317	8.12264	8.25022	8.12465	8.05429	8.28511
proline	9.36026	9.36799	9.18347	9.2446	9.35213	9.17153	9.0994	9.24935	9.18912	9.03713	9.35257	9.50229	9.46987	9.48138	8.92785	8.82051	8.88863	9.03073	9.03253	9.26045	9.16869	9.18508
serine	7.65899	7.51184	7.38893	7.37427	7.56086	7.48906	7.49241	7.58928	7.56894	7.50212	7.61556	7.78514	7.44097	7.36497	7.46815	7.35283	7.63199	7.36414	7.26774	7.34189	7.48959	7.41944
threonine	8.53569	8.25411	7.86182	7.91808	8.16232	8.09305	7.94252	8.0095	8.03222	8.0478	8.26042	8.18509	7.95498	8.0924	8.02152	8.04189	8.11927	7.76113	7.68627	7.9203	8.02727	8.09731
tryptophan	7.72268	7.52173	7.20958	7.26412	7.52743	7.35582	7.51677	7.51851	7.54528	7.66872	7.90374	7.73166	7.48922	7.73698	7.02378	6.97815	7.20571	7.18231	7.27693	7.36534	7.30468	7.40603
tyrosine	8.13955	7.76258	7.75797	7.62803	7.92016	7.97201	7.89086	7.75804	7.76766	7.79788	7.92408	7.97234	7.89293	7.88616	7.60263	7.52919	7.5751	7.52113	7.48213	7.84486	7.92438	7.68951
valine	8.54911	8.30286	8.11251	7.99121	8.17954	8.14383	8.14281	8.04949	8.02779	8.09501	8.38639	8.38907	8.20051	8.27642	7.96709	7.87253	7.86509	7.90664	7.95209	8.09977	8.09189	7.99265
dimethylglycine	5.85611	6.0263	4.74134	5.61093	5.85421	6.04286	5.98233	5.87252	5.961	6.14427	6.02518	6.28262	5.98934	5.81506	5.89224	5.90929	5.63917	5.42737	5.68447	5.96687	6.0144	6.25797
ADMA.SDMA	8.2971	7.96789	8.28096	8.0558	8.04509	8.04215	7.92001	8.05327	8.00947	7.8837	8.22958	8.12546	7.77787	7.85158	8.0182	7.78771	7.45659	7.68812	7.66933	7.97344	7.84116	8.12195
NMMA	7.25192	7.29544	7.70138	7.40955	6.99678	7.27146	7.30454	7.64054	7.54107	7.19445	7.52753	7.65132	7.13301	7.26526	7.32171	7.00284	6.80709	6.90749	7.05662	7.40866	7.37548	7.16872
X2.aminoadipate	6.16178	6.24654	5.5219	5.49914	5.55406	5.90796	5.84083	5.55408	5.63462	5.49942	5.43524	5.71175	5.57513	5.26217	5.86544	5.84295	5.70807	5.05053	5.00733	5.87406	5.58055	5.7571
citrulline	6.22212	6.20904	5.8045	5.75986	6.01414	6.15013	6.05481	5.74031	5.80572	6.30661	6.29134	6.10816	5.86248	5.90968	6.07295	6.0886	6.08707	5.57787	5.64827	6.11162	6.04995	6.16621
creatine	9.50404	9.6328	9.37432	9.49758	9.62845	9.60943	9.36032	9.36697	9.48719	9.61923	9.46469	9.27303	9.6265	9.59597	9.36685	9.48815	9.49185	8.86795	9.08773	9.10336	9.15376	9.50569
cystathionine	5.79227	5.77584	5.12972	5.18669	4.91883	5.14166	5.44834	4.98502	5.08306	5.45347	6.19199	5.97725	4.61827	4.96331	5.19343	5.14163	5.96859	5.65352	5.11934	5.62036	5.5513	5.54581
hippurate	3.82754	4.05554	3.97212	4.04592	3.82506	4.24792	3.96769	NA	NA	3.83723	NA	4.04964	3.46343	3.95246	3.96698	3.82755	3.95882	NA	3.44904	3.81109	3.45758	3.95213
hydroxyproline	7.96723	7.57162	6.74408	7.22902	7.20599	7.3268	7.12621	7.44201	7.4225	7.6721	7.93409	7.8294	6.84515	7.04538	7.49718	7.32803	7.38244	6.83911	6.61045	7.26538	7.2787	7.53755
kynurenine	4.51607	4.50133	6.83152	5.88044	4.31496	4.6114	4.60559	4.37563	4.42267	4.51205	4.42502	4.7292	4.30388	4.51396	4.52219	4.54008	4.31721	4.35411	4.3107	4.64093	4.61431	4.76513
methionine.sulfoxide	6.0181	6.09615	5.74557	5.82205	5.88082	6.11502	6.00946	5.95227	6.08936	6.05583	6.10206	6.23924	6.21943	6.04401	6.01189	5.97073	6.08415	6.05865	6.04623	6.07137	6.25425	5.88938
ornithine	5.97008	6.51955	6.41056	6.81312	5.99509	6.38122	6.665	6.52684	6.41262	6.85789	6.91298	6.92569	7.15035	6.90934	6.6718	6.51441	6.821	7.22298	7.49166	6.65253	6.69482	6.52369
orotate	5.26384	5.93341	NA	4.17142	4.52454	3.95359	6.10859	5.22409	5.45203	5.7454	5.53385	5.88008	5.64158	5.91851	6.11547	6.00654	5.06206	5.2577	5.3888	4.73412	5.26991	5.4548
phosphocreatine	4.63773	4.24608	5.68216	5.96426	4.47607	3.44606	6.34192	6.2225	6.25368	5.69701	6.60736	6.80635	4.76437	4.71218	6.18382	6.04559	5.54681	NA	3.95329	4.97287	3.96853	5.41536
pipecolic.acid	6.32295	6.65935	6.49698	6.59532	6.53126	6.55515	6.52789	6.57098	6.52783	6.72339	6.53626	6.70997	6.55228	6.59093	6.46261	6.61223	6.40402	6.51464	6.49067	6.51865	6.60799	6.73896
quinolinate	4.06325	4.55118	4.46461	4.4593	4.25531	4.49969	4.55671	4.12996	4.34527	4.32354	4.24245	4.34529	4.13465	4.37181	4.44596	4.46486	4.55818	4.27737	4.18484	4.69294	4.35368	4.53199
salicylurate	4.13126	4.1107	3.8304	4.11432	4.1009	4.1204	4.19686	NA	NA	3.95724	NA	3.95826	3.83712	4.26757	4.05203	4.18515	4.18437	3.85094	NA	3.95192	3.84722	4.12008
sarcosine	7.6172	7.63105	7.561	7.68035	7.76827	7.61475	7.49849	7.51062	7.51768	7.60386	7.4624	7.48273	7.76319	7.57756	7.55253	7.6768	7.54415	7.05218	7.2855	7.04929	7.23302	7.69594
betaine	8.87978	8.88407	8.90638	8.81132	9.17813	9.36971	8.9254	9.0364	8.9111	8.8834	9.01807	9.17581	8.79427	8.75276	8.95455	8.83556	8.42585	9.1788	9.18209	9.11715	9.09105	9.06719
aminoisobutyric.acid	7.01736	7.43718	6.51209	6.7517	6.67816	6.87056	6.7816	6.29182	5.57752	6.3567	6.71742	6.99074	7.35186	7.35854	6.85687	6.88568	6.84046	6.39102	6.70693	6.85064	7.09187	7.19056
GABA	7.05495	7.4894	6.58991	6.84684	6.86395	6.93472	6.86199	6.40442	6.33416	6.74543	6.89221	7.11389	7.41107	7.42469	6.955	6.98378	6.95143	6.57281	6.72467	7.03215	7.17092	7.33886
X5.adenosylhomocysteine	6.20161	6.0495	6.06521	6.02878	6.13717	6.16174	6.11511	5.93768	5.88163	6.17037	6.39476	6.57306	6.43941	6.13682	6.17557	6.01326	5.91612	6.08522	6.21015	6.04073	5.97417	6.03627
glutathione.oxidized	6.40004	6.68486	5.89543	6.36688	6.24924	6.09501	5.89583	6.18969	6.17682	6.47242	6.79862	6.62003	5.78183	5.4739	6.57394	6.69783	6.77024	6.20587	5.50227	6.03243	5.94664	6.48807
glutathione.reduced	7.87121	7.564	7.00424	7.29897	7.74615	7.63134	7.03488	7.61467	7.56906	7.27458	7.76945	7.56285	7.35248	7.1285	7.35526	7.41448	7.68305	7.68766	6.99474	7.62985	7.68635	7.25087
carnosine	7.26522	7.51551	7.13725	7.17768	6.53795	7.05659	6.42769	6.08495	6.16092	6.23377	6.16852	6.5181	5.84978	6.19017	7.12132	7.78349	7.05818	8.02001	7.29574	6.44557	6.37529	8.4344
adenosine	7.80904	7.2149	8.84717	9.03339	8.19582	8.12725	8.19123	8.73797	8.98367	8.49858	9.24308	9.36536	8.9699	8.59903	7.59122	8.11632	7.28777	8.46553	8.2864	7.04826	7.24745	8.36119
guanosine	5.96327	6.44621	7.58182	7.79857	6.23215	6.67984	6.94043	7.51068	7.35975	6.60563	6.56939	7.24854	6.53064	6.26989	6.60908	6.79994	7.72806	7.40265	7.31861	7.75759	7.56138	7.84723
inosine	7.34047	7.52159	8.14997	7.97331	7.56107	7.71776	7.76123	8.03432	8.0623	7.59865	7.85995	7.58088	7.67075	7.57097	7.92592	7.92829	8.00892	8.12281	7.95977	7.7223	7.61041	7.93394
xanthosine	6.39939	6.93895	NA	6.51501	6.75575	6.78292	4.90488	5.07223	4.53603	NA	6.25173	6.29774	6.14565	6.78153	6.79016	6.82501	7.59826	6.59741	6.96611	6.22848	6.16139	6.40505
cytidine	6.44511	6.79302	6.41368	6.89103	6.66789	6.99003	6.92476	7.02127	6.81347	6.10546	5.59709	6.06636	5.20971	4.76841	7.4387	7.50473	7.01299	7.4159	7.21812	7.48401	7.36222	7.53021
X2.deoxycytidine	NA	5.32618	4.87656	4.59315	4.95263	5.70226	5.14556	5.91024	5.80568	5.03959	NA	5.49979	NA	NA	5.90665	6.11911	5.75531	6.34728	6.00552	6.15783	6.17337	5.59296
uridine	6.8101	6.91894	7.57007	7.61861	6.27591	6.77012	6.61562	7.61942	7.48725	6.94851	7.32102	7.45942	7.00589	6.81581	8.20682	8.09916	7.8516	7.93843	7.83141	8.03118	7.82301	8.06213
AMP	7.81454	7.30743	6.68466	6.33482	7.93642	7.75476	7.63237	7.81849	7.70617	7.50789	7.64268	7.51348	7.40108	7.24435	6.28127	6.27855	6.21607	7.20627	6.76775	6.91053	6.87951	6.30108
ADP	7.52085	6.96283	7.32163	7.0957	7.34091	7.17519	6.96365	7.44781	7.385	7.35178	6.84371	6.84719	7.27013	7.26367	6.16036	6.51657	5.31984	6.91335	6.75214	5.31774	6.13431	6.63945
adenylosuccinate	5.91588	5.70824	4.06313	4.31239	5.62172	6.04763	6.17295	5.67512	5.92978	5.18815	5.76763	5.90477	4.97074	4.91106	4.34965	4.05169	4.78264	4.78756	5.16957	5.00491	5.01725	4.18127
GMP	7.48672	7.36199	6.16644	5.94414	7.455	7.37879	7.29124	7.55821	7.45197	7.06763	7.26629	7.3057	7.06445	7.09683	6.24114	5.73269	6.61979	7.26949	7.1858	7.15411	7.06131	5.49469
GDP	6.833	6.60833	6.16175	6.19088	6.47883	6.32646	6.11498	6.63672	6.52747	6.55748	6.0329	5.97713	6.22672	6.42442	4.65054	5.32064	4.91412	5.98371	6.08205	4.25591	4.83427	6.01582
IMP	8.01049	7.58798	5.67743	5.68448	7.41077	7.2738	6.21193	6.83237	6.66568	6.48875	7.15825	6.95869	7.18227	7.44747	5.92508	6.06534	6.54863	7.25927	7.41261	6.30913	6.43198	5.80676
XMP	4.46829	4.35331	5.06653	4.63081	5.77462	5.35797	3.83111	3.82944	4.05964	4.2701	4.95464	4.69762	4.87485	5.37295	5.00257	4.35992	5.7867	4.83349	5.43173	5.0655	4.91968	4.83481
NAD	NA	4.18013	NA	NA	6.39094	6.5086	4.50466	6.47823	6.50483	6.38601	3.85551	3.44822	6.26754	6.30794	4.10869	4.12694	5.51746	5.84227	6.28245	5.51379	5.6918	4.36733
NADP	4.32099	4.79402	4.19278	4.67452	5.90648	6.1168	3.46073	5.70347	5.73532	5.34296	4.51717	4.47636	5.41983	5.09351	4.83267	4.72765	5.38027	5.46003	5.57287	5.45528	5.44067	4.68516
cAMP	4.53731	4.42322	4.85528	4.91151	5.31145	4.92258	4.64551	4.53332	4.70775	4.41776	4.35076	4.5224	4.68633	4.60565	4.71197	4.82738	4.49768	4.65829	4.56737	4.59476	4.70492	4.47802
CMP	6.78742	6.43492	5.97418	6.1061	6.96624	6.86278	6.73824	6.25909	6.1884	6.03313	6.36539	6.40129	6.3179	6.17435	5.79297	5.51605	6.04059	6.64285	6.45507	6.76177	6.66822	6.18974
CDP	5.83084	5.35788	4.5219	4.87346	5.58334	5.19932	4.95142	5.19018	5.22539	5.41014	4.79561	4.60369	5.45047	5.41535	3.83369	4.32032	3.45311	4.93419	4.91377	3.4528	4.31458	4.31487
UMP	7.56191	7.45362	6.61786	6.06446	7.83007	7.65925	7.34282	7.65749	7.60463	7.16997	7.48516	7.57335	7.26768	7.14034	5.76077	5.6213	6.66066	7.76959	7.56952	7.51442	7.48912	5.94711
UDP	7.08887	6.7438	6.08475	6.30529	7.25947	7.17322	6.74294	6.92051	6.8153	6.91652	5.87354	5.8125	6.49981	6.5439	5.97444	6.33007	4.97999	6.14534	6.31148	NA	5.14694	5.99743
dCMP	4.98095	5.03986	4.79727	4.93399	4.86574	4.78573	5.12593	4.56949	4.66601	5.06051	4.98636	5.11196	4.66311	4.19548	4.86968	5.00921	4.88479	5.11592	4.96352	5.55081	5.05911	5.03173
dTMP	4.70568	4.47331	4.40712	3.84654	4.70863	4.7004	4.30604	4.44824	4.54422	4.6169	5.19034	4.84793	5.00143	4.53686	3.46454	3.45946	3.8387	4.49735	4.50397	4.78623	4.42513	3.45006
UDP.galactose.UDP.glucose	7.15652	6.84364	6.13296	6.5091	6.87952	6.60307	6.52869	7.14069	7.10925	6.77036	6.41017	5.65244	6.7791	6.42352	6.53838	6.4167	6.55596	5.92764	6.26508	6.2025	6.28658	6.37103
UDP.glucuronate	6.52043	6.53602	6.108	6.40586	6.41305	5.8881	6.88846	5.77521	5.75084	5.98	6.43134	6.54108	5.89619	6.26743	6.52528	6.55302	6.12691	3.96126	4.61824	5.25737	5.72169	6.78446
malondialdehyde	4.40677	5.15141	4.36821	4.40646	4.80346	4.5389	5.03728	4.6938	5.11745	4.9995	4.60665	5.05116	5.3239	5.3162	5.09864	4.76594	5.62526	5.97639	5.24965	5.16159	5.41998	4.86823
X4.hydroxybenzaldehyde	NA	3.9465	4.30869	4.55054	4.39651	4.18209	4.05651	NA	4.24303	4.07187	4.12522	4.24791	4.16467	4.10866	4.25049	4.42528	4.35728	4.54269	4.0398	NA	NA	4.24452
cytosine	8.48728	8.50602	8.40031	8.45303	8.57534	8.40727	8.32029	8.46975	8.3238	8.0284	8.12521	8.22884	6.96555	6.97337	8.53877	8.5624	8.45904	8.80906	8.74149	8.60673	8.5047	8.84388
thymine	4.74124	4.99869	5.33022	5.36018	4.59954	4.88853	5.24847	4.89279	4.92282	4.73617	5.2936	5.25329	5.26894	4.82881	5.61964	5.59689	5.14749	4.9662	5.07039	5.93707	5.50194	5.7168
uracil	7.13197	7.32695	8.16329	8.0769	7.28318	7.55336	7.01853	6.80112	6.62711	6.64793	6.49075	6.73683	6.9864	7.32175	7.56394	7.3965	7.25443	7.74857	7.4262	7.49679	7.16665	7.89471
X4.pyridoxate	4.82771	4.9671	3.43875	3.94007	5.10218	5.23113	4.46743	3.96037	4.20055	4.35633	4.06083	4.14125	4.83293	5.76962	4.73882	4.68596	5.21832	5.17191	5.33044	4.35115	4.51555	4.60382
niacinamide	9.90144	9.90891	9.63091	9.61949	9.48379	9.26369	9.88773	9.49796	8.74819	9.50878	9.61197	9.62596	9.11332	8.43091	9.48655	9.62454	9.61966	9.3322	8.90639	9.49045	9.61458	9.64373
X1.methylnicotinamide	5.51679	5.84383	NA	6.17002	5.81807	5.71547	9.47733	8.66685	8.53838	7.10251	7.35009	7.18669	5.37092	5.60441	9.62591	9.34946	7.94359	5.8783	5.74991	6.64216	6.55111	7.15987
folate	4.79764	4.94012	5.01772	4.73554	3.44638	4.46762	4.24416	3.44675	3.45082	3.46095	3.44396	4.56597	4.05515	3.45779	4.55219	4.91498	4.05317	3.45815	4.25586	4.17651	4.07542	4.65575
histamine	5.94855	5.97386	6.00596	6.00876	5.91622	5.85654	5.93912	5.85842	5.85309	6.03691	6.22583	6.05048	6.11025	6.02091	5.81937	5.67911	5.99909	5.7226	5.7799	5.72783	5.77343	5.92248
adenine	5.47726	4.74286	6.24864	6.95244	5.59568	5.82317	5.62821	6.09908	6.13564	5.83812	5.5571	5.78131	5.05838	5.00436	4.59357	5.25341	5.42706	5.8313	5.83975	5.88648	5.72156	6.13838
guanine	3.45466	3.43707	4.61408	4.8406	5.82315	5.99337	6.25329	6.73421	6.59111	6.42839	6.07605	6.46909	6.03803	5.97395	6.10431	6.19211	7.07364	6.52102	6.77768	6.57355	5.97959	7.21647
xanthine	7.05906	7.18036	7.63297	7.52161	7.02916	7.1183	5.72012	4.80136	4.8379	5.47536	6.50823	6.62878	6.91555	7.12798	7.88507	7.88491	7.66452	7.84426	7.70206	7.30575	7.31832	7.0385
hypoxanthine	7.57832	7.55013	8.11803	8.0424	7.62891	7.73798	7.74434	7.97272	7.98865	7.18564	7.6016	7.61813	7.72181	7.7924	7.84272	8.01004	8.00703	8.03067	8.02152	7.78124	7.69589	8.04762
urate	6.12856	6.39619	6.34582	6.08824	6.45433	5.78371	5.48984	4.25952	4.14044	4.93574	4.47902	4.87809	6.07394	6.71192	6.59813	6.62649	7.11145	6.73542	7.13481	6.25946	6.31937	6.55199
fructose.glucose.galactose	6.27217	6.92264	7.25535	6.90036	6.85058	6.54056	7.14672	7.1983	7.01514	6.99969	6.62968	7.34107	6.5862	6.22936	7.01715	7.2811	6.6028	6.88172	6.67226	7.057	7.00151	6.77287
erythrose.4.phosphate	6.0283	6.10521	6.4559	6.4557	6.05098	6.00489	6.31798	6.03478	6.04751	6.29307	5.92368	6.58901	5.93295	5.74337	6.49933	6.50335	5.82542	6.02043	5.98758	6.50433	6.34431	6.16833
alpha.glycerophosphate	6.05321	6.18986	6.23138	6.2798	6.32233	6.01322	5.90941	6.06899	6.00872	5.95883	5.67174	6.00837	5.61579	6.21095	6.70198	6.38245	6.46068	6.77339	6.10716	6.97717	6.50419	5.85161
pentose.monophosphate	7.20343	7.33491	7.83332	7.73432	6.6093	6.5488	7.14775	7.2199	7.16829	6.80857	6.83065	7.04159	6.29805	5.89947	7.48545	7.43997	6.4525	6.54391	6.54978	6.91895	6.91249	7.12432
hexose.diphosphate	7.37612	7.20692	8.08263	7.91349	6.09381	5.95771	7.64645	6.00087	6.39894	6.88564	7.69396	7.6459	6.19227	5.71605	7.30063	7.40146	5.83833	5.51184	5.97293	6.7241	6.78058	7.00188
hexose.monophosphate	8.05024	7.68931	8.04626	7.6841	7.31345	7.0967	7.80483	7.87307	7.73549	7.71998	7.43248	7.91794	6.95243	6.46661	7.52395	7.8329	7.03149	6.98612	6.95894	7.94191	7.74901	7.65274
lactose	6.2837	6.22572	6.80237	6.5675	6.78441	6.81498	6.27352	6.38327	6.28388	6.26866	5.97636	6.0022	6.35694	6.48982	5.95895	6.31875	6.24924	6.16809	6.50967	6.00531	6.07248	5.90071
sucrose	6.01658	6.1357	6.29238	6.22593	6.27261	6.40052	6.1519	5.97144	5.97259	6.0006	5.79909	6.15714	6.5146	6.10616	5.69815	5.99182	6.31873	6.19036	6.24254	5.80825	5.80793	5.98258
glucuronate	6.47306	6.14567	5.81909	5.89092	6.05762	6.24174	6.45494	5.63764	5.64664	5.86846	6.26912	6.20626	5.91585	5.87225	6.01774	6.15575	5.87107	6.27996	6.39947	6.18816	5.89424	6.62561
X6.phosphogluconate	5.15514	5.56933	4.97627	5.03731	4.76709	4.82339	5.00421	5.30296	5.33764	5.58466	4.91788	5.33969	5.17174	4.32064	5.22629	5.05028	4.45808	4.70706	4.70627	5.91031	6.02266	5.13224
X3.phosphoglycerate	4.88912	4.63682	5.48561	5.46958	4.6875	4.97928	5.31057	4.84675	5.28812	5.21442	5.49276	4.79052	6.13941	5.57581	6.91737	5.42113	7.19489	6.36725	6.83146	7.16346	7.13806	4.96042
carnitine	9.12148	9.06935	9.26098	9.38557	9.28391	9.4918	8.81695	8.96688	8.79092	8.8268	8.67623	8.95007	9.05029	8.8445	9.16527	9.09398	9.03959	9.47178	9.50001	9.62978	9.49077	9.26025
pantothenate	7.53666	7.38761	6.82971	6.90768	7.28828	7.43807	6.85362	7.65393	7.52821	7.22416	7.05804	7.27303	7.18195	7.16313	7.66138	7.57333	6.69716	7.31332	6.86406	7.53034	7.46799	7.46146
putrescine	7.46409	7.22176	6.01093	6.60479	7.88185	7.3421	6.72084	6.53808	6.45315	7.15572	6.97163	7.32333	7.51852	7.35453	7.20891	7.27244	7.37502	7.32279	7.03839	7.53312	7.52373	7.3146
spermidine	9.00546	8.611	8.75522	8.63585	9.14289	9.0358	8.53061	9.00533	8.95217	8.66355	9.18058	8.80487	8.8549	9.07833	8.75427	8.77963	9.13364	9.06469	9.26142	8.88804	8.80292	8.91678
phosphoenolpyruvate	4.18216	3.82717	5.94051	6.11236	5.40644	5.58683	5.38669	5.13297	5.41264	5.64411	5.83183	4.9631	6.39164	6.04681	7.1243	5.89363	7.3125	6.13596	6.51784	6.53317	6.60392	5.30306
trimethylamine.N.oxide	6.96394	6.85153	7.48928	6.98845	7.48706	6.8248	6.91579	7.26897	7.27466	7.05144	7.24662	7.12874	7.18718	6.90568	6.95636	6.92602	7.13552	7.27395	7.06087	6.80716	6.83525	6.97305
inositol	5.02139	5.1082	5.72879	5.87321	6.14544	5.65687	5.53558	6.05727	5.99957	5.56891	5.02394	4.91641	4.93197	4.87676	5.53667	5.48887	5.46942	5.54603	5.7123	5.71229	5.38368	5.2446
allantoin	7.00384	7.00318	6.77135	6.69106	6.87556	6.47159	6.61925	6.5878	7.07572	7.09641	7.10357	7.39711	6.88569	6.86576	6.40945	6.77602	6.36331	6.9045	6.35657	6.34807	6.73993	6.98545
creatinine	8.03814	8.48768	7.9346	8.21726	8.05859	8.23189	7.85264	7.95393	7.93856	7.70824	7.79485	8.26451	7.8826	7.94772	8.12292	8.24769	7.88152	7.69371	7.81564	7.75901	7.90771	7.93806
pyroglutamic.acid	7.15072	7.14122	6.94297	6.91977	6.57149	6.41938	6.68929	6.62577	6.91016	6.9149	6.76924	7.24065	7.17133	7.02277	6.89345	7.59988	6.28979	5.80712	6.15416	5.99278	6.23966	6.4285
DHAP.glyceraldehyde.3P	7.6507	7.43315	7.83865	7.7728	5.66594	5.30093	7.25689	5.60767	6.03803	6.41026	7.43023	7.27632	6.05193	6.07254	7.19875	7.22964	6.17747	5.62653	5.53068	6.53408	6.53122	7.20085
phosphoethanolamine	7.19065	7.48957	7.65337	7.66278	6.17145	6.61029	6.55774	7.6921	7.69257	7.03219	6.71265	7.20927	6.90923	6.64961	7.1513	7.15369	7.41741	7.96352	7.68829	7.27763	7.28428	7.24244
alpha.ketoglutarate	5.72968	5.91571	5.57784	5.54239	5.51025	5.56015	5.4076	5.47329	5.49563	5.30293	5.42148	5.42036	5.50725	5.54902	5.35505	5.45304	5.57128	5.32204	5.46099	5.41182	5.20448	5.50967
taurine	7.5581	7.93214	8.30779	8.50274	8.47123	8.70826	8.79663	8.843	8.68483	8.40551	8.8592	9.03736	9.37017	8.96123	9.02513	9.13823	9.07101	9.62574	9.62674	9.33646	9.25068	9.36019
adipate	5.22376	5.44686	5.2243	5.24656	5.03725	5.00022	5.20737	5.05113	4.96911	5.12193	5.35428	5.61566	5.11047	5.05724	5.39797	5.56917	5.27267	5.01456	5.22005	5.19827	5.11754	6.06554
malate	7.60363	7.40106	7.74106	7.72551	7.52932	7.47347	7.62174	7.71391	7.69266	7.39451	7.79831	7.54983	7.40262	7.56255	7.70216	7.75522	7.75142	7.60333	7.65244	7.58015	7.45865	7.75001
methylmalonate	5.67674	5.68437	5.62567	5.98353	5.69373	6.21984	5.80438	5.8127	5.89891	6.82248	5.93998	5.93163	6.60993	6.56569	5.60239	5.83324	6.0077	5.90927	5.92172	6.89358	6.56984	7.62292
oxalate	5.6378	5.73239	5.84661	5.82187	5.44231	5.49762	5.5559	5.44679	5.5484	5.61483	5.74849	5.68125	5.81933	5.68579	5.29375	5.36924	5.68739	5.23648	5.60547	5.68401	5.30769	5.68024
succinate	7.12135	7.2347	7.06782	7.23797	7.65552	7.58505	7.31852	7.68352	7.58087	7.18684	7.20358	7.14883	7.29787	7.4143	7.17359	6.84891	7.44844	7.43858	7.35767	7.21951	6.97343	6.83936
aconitate	5.11493	5.51312	5.4254	5.15082	5.19592	5.02899	5.85737	4.93247	5.01882	4.89259	5.13088	5.46155	5.72525	5.50471	5.66837	5.80537	4.60419	4.46922	4.8707	4.54634	4.45693	6.11911
citrate	7.00521	7.17329	7.22463	6.98173	7.07292	7.13783	7.45002	7.04078	6.97275	6.86589	7.01721	7.13093	7.48746	7.37597	7.67873	7.71005	6.64904	6.57673	6.84591	6.93217	6.79714	7.71293
isocitrate	5.44861	5.60403	4.63459	5.41438	4.06325	3.8275	5.9779	4.62367	4.80032	4.85409	5.23513	3.82751	5.54133	5.1563	6.24426	6.26788	5.01303	4.25165	4.13145	4.82817	4.73415	6.34755
X2.hydroxyglutarate	6.08036	6.35277	6.54521	6.63938	6.1942	5.92449	6.47871	6.44986	6.38972	6.17807	5.98681	6.14303	5.97132	6.37698	6.28561	6.2335	6.0331	6.02335	5.95854	5.85237	5.86704	6.50758
lactate	7.41821	7.42734	7.46437	7.46723	7.24073	7.30621	7.54544	7.83175	7.88905	7.44399	7.35613	7.42147	7.64612	7.70296	7.24599	7.23587	7.02537	7.62739	7.47518	6.99975	7.18775	6.88165
beta.hydroxybutyrate	4.36793	4.6966	NA	3.44703	3.92695	4.07293	4.33754	NA	NA	4.11499	4.19654	4.18823	3.95659	4.47209	4.40453	4.25062	4.13366	4.07762	3.8473	4.0737	4.1305	4.5347
fumarate.maleate.alpha.ketoisovalerate	6.98447	6.72982	6.91655	6.99004	6.594	6.7111	6.96927	6.94196	6.94168	6.86988	6.99581	6.81447	6.75115	6.76204	6.81757	6.81861	6.9526	6.8098	6.84165	6.75372	6.4942	6.93861
X3.methyladipate.pimelate	4.26014	4.78326	4.13805	4.35046	4.36048	4.35915	4.42036	4.0562	3.97897	4.21854	4.31698	4.62925	4.5646	4.41011	4.33372	3.95974	4.70889	4.7283	4.46382	4.31767	4.77683	4.418
butyrobetaine	8.43192	8.27963	8.22626	8.29737	8.65899	8.60546	8.78247	8.54387	8.49231	8.19963	8.56699	8.73513	8.45221	8.38819	8.34541	8.20252	8.08359	8.61198	8.54028	8.67946	8.61421	8.68941
sorbitol	8.38516	8.11686	8.61362	8.52987	7.1562	7.35612	7.65135	7.8704	7.82542	7.83692	8.30962	7.93289	7.54104	7.52916	6.71658	6.93489	6.84372	7.11056	7.18969	7.09364	6.93497	7.75998
bilirubin	4.9281	4.87843	4.69866	4.77359	5.22087	5.52727	4.73164	4.66271	4.85904	4.78674	4.72804	5.01815	4.24213	3.83511	5.02709	4.86677	4.65117	4.11294	4.8125	4.93407	4.86571	5.18756
glycocholate	4.61643	4.59913	4.5639	4.49544	4.49113	4.39986	4.66709	4.47558	4.75235	4.48209	4.85784	4.4015	4.46696	4.62267	4.77913	4.60201	4.83446	4.59994	4.69626	4.43577	4.25018	4.90964
glycodeoxycholate.glycochenodeoxycholate	5.56154	5.41104	4.95951	4.98812	5.0044	5.09722	4.76932	4.75039	4.61781	4.57283	4.66654	5.14945	4.41743	4.06232	4.9584	4.97887	4.73629	4.4208	4.78509	4.89415	4.63609	4.98469
taurodeoxycholate.taurochenodeoxycholate	3.95495	4.31474	4.24223	4.25894	4.17316	4.30675	4.12049	4.32593	4.47648	4.69893	3.96324	4.29906	4.33848	4.68388	4.18601	4.48701	4.24131	4.1597	4.35406	4.46167	4.55125	3.8369
chenodeoxycholate.deoxycholate	5.39807	5.20251	5.55899	5.70941	5.36505	5.40816	5.76917	5.83884	6.10341	5.74625	5.85344	5.56785	5.68406	5.81827	5.72758	5.78064	5.9366	5.75046	5.80583	5.63668	5.61152	6.07094
C16.1.CE	7.10003	6.49081	7.03988	7.03065	7.77692	7.40366	7.32242	6.9984	6.85041	7.42741	7.21599	7.02215	7.81384	7.63451	6.98223	7.07867	7.19399	7.48199	7.89737	7.15604	7.23803	7.49943
C18.1.CE	7.51835	7.10654	7.48392	7.54596	7.96554	7.85003	7.57451	6.97154	7.14602	7.13148	6.9363	7.16361	8.17655	8.11602	7.06311	7.28719	7.07301	7.59676	8.37624	7.68227	7.66509	7.48366
C18.2.CE	7.23447	6.57779	6.94896	7.17489	7.80177	7.43673	7.36478	6.6706	6.7338	7.34655	7.15855	6.86682	7.93441	7.73494	6.78874	6.96733	7.16957	7.64791	8.394	7.22609	7.21008	7.52919
C18.3.CE	6.53856	5.95381	6.02525	6.48925	6.99029	6.7165	6.78033	6.36454	NA	NA	NA	6.35368	7.2178	6.89272	6.40172	NA	6.50806	6.97514	7.56466	6.39225	6.41496	6.82275
C20.3.CE	6.88936	6.36485	7.0898	7.06584	7.6011	7.55727	6.99409	6.88772	6.90826	7.30511	7.07887	6.90095	7.65394	7.64719	6.64611	7.06619	6.91799	7.23357	7.63	7.16307	6.97365	6.93644
C20.4.CE	7.19258	6.64101	7.15132	7.18049	8.01003	7.96191	7.36619	6.83814	6.98219	7.32015	7.10655	6.973	7.8234	7.50282	6.84724	7.05318	7.1758	7.41577	8.04193	7.3113	7.11778	7.40241
C20.5.CE	6.57003	5.90731	6.54257	6.85048	7.35625	7.14195	6.83002	6.31541	6.5651	6.96381	NA	6.68464	7.27887	6.95009	6.47748	6.71689	NA	6.76471	7.10591	6.83364	6.4581	6.79251
C22.6.CE	6.94089	6.54037	7.6851	7.56995	7.74688	7.85284	7.68339	6.53482	6.74672	7.00676	6.76524	6.77355	7.67608	7.20786	6.78358	6.94121	6.79003	7.13597	8.06438	7.0812	7.10272	6.89455
C14.0.SM	8.16741	8.17142	8.02361	8.15213	8.22663	8.2619	7.8304	8.13009	8.22465	8.1523	7.97122	7.98578	8.0839	8.03509	8.23235	8.21214	8.18956	8.25655	8.15684	8.0592	8.13023	8.14167
C16.0.SM	9.09777	9.19047	9.05843	9.18152	9.04616	9.13555	8.94444	9.16403	9.3651	9.34949	8.98381	8.92004	8.94667	9.00566	9.12285	9.16866	9.1777	9.26826	9.36747	8.96927	8.98742	9.05083
C16.1.SM	8.10014	8.01334	8.26259	8.43649	8.52455	8.30511	8.36278	8.30273	8.38445	8.50515	8.22322	8.11741	8.61252	8.56654	8.48765	8.61031	8.47467	8.22523	8.42625	8.23646	8.34631	8.41083
C18.0.SM	7.90343	7.80248	7.92226	8.13137	8.10277	8.19828	8.10363	8.27392	8.29558	8.3477	8.06587	8.31067	7.94664	7.86956	8.47659	8.54281	8.33428	8.53313	8.45697	8.20584	8.05918	8.30476
C18.1.SM	7.87993	7.58378	7.97099	8.1778	8.45007	8.183	8.34145	8.2024	8.34039	8.64131	8.45632	8.19865	8.2472	8.21562	8.30659	8.29581	8.40634	7.94112	7.7764	8.00112	8.01733	8.1809
C18.2.SM	6.8498	6.89392	6.83912	7.02954	7.13884	7.07836	7.01008	7.13192	7.23753	7.31705	7.36246	7.20496	7.03359	7.01701	7.00012	7.08374	7.40261	7.36461	7.45945	6.62298	6.85609	7.26978
C22.0.SM	9.02839	9.138	9.00027	9.10959	9.10995	9.10133	9.25234	9.06311	9.09303	9.09504	8.87127	8.91781	9.16645	9.343	9.09597	9.062	8.92852	9.10429	9.04326	9.02487	9.06193	9.113
C22.1.SM	8.61427	8.74331	8.70208	8.79726	8.793	8.73771	8.89275	8.51278	8.58956	8.83843	8.46566	8.62113	8.89084	8.83489	8.76996	8.85654	8.64413	8.76671	8.77598	8.80306	8.76112	8.54083
C24.0.SM	8.46399	8.37487	8.55167	8.6771	8.50908	8.49423	8.49292	8.48263	8.54509	8.75339	8.52765	8.37953	8.34263	8.39412	8.59616	8.69725	8.69032	8.66739	8.57831	8.42259	8.48156	8.73775
C24.1.SM	8.45881	8.69555	8.63134	8.69829	8.74693	8.78014	8.66376	8.44312	8.4122	8.44633	7.98188	8.35563	8.73816	8.89788	8.6085	8.66559	8.66142	8.42591	8.63193	8.55686	8.58093	8.79298
C2.carnitine	8.67881	8.67258	9.10435	8.71502	8.77684	8.82063	8.43406	7.97057	7.96631	8.34123	7.71567	7.86264	8.94908	8.91971	8.38419	8.39879	8.15195	8.43793	8.15748	8.61547	8.86162	7.78207
C3.carnitine	7.54732	7.05995	8.49023	8.28169	8.09178	8.0424	7.39721	7.04691	6.93209	7.43391	6.89292	6.96043	7.99227	7.98489	7.35434	7.33321	8.08846	8.16085	7.55227	9.06101	8.88795	8.03454
C4.carnitine	6.73756	6.78203	7.64635	7.43149	7.4929	7.53216	7.44153	7.28696	7.17596	7.51542	6.67129	6.82584	7.22627	7.58574	7.25032	7.12798	7.29128	7.52885	7.31818	8.152	8.18447	7.62957
C5.carnitine	6.93649	6.82457	7.85789	7.479	7.45186	7.81083	7.54746	7.30146	7.21252	8.08715	6.98061	6.52514	7.21306	7.60662	7.95272	7.97394	7.94858	7.85083	7.84717	8.5409	8.54436	8.32899
C6.carnitine	5.59946	5.53573	6.93512	6.76855	6.5108	6.29857	6.0521	5.51817	5.5238	6.11071	5.08851	5.37092	6.73387	6.64456	6.33502	6.1657	6.24283	6.46353	6.12365	6.59545	6.72886	5.71567
C10.carnitine	NA	NA	5.1754	5.08852	4.64382	4.63791	4.88116	NA	3.84478	4.65595	4.56365	NA	4.50711	5.20024	5.13787	4.65748	4.41043	4.88815	4.63741	4.51185	4.9746	4.06144
C14.carnitine	5.77217	5.85251	6.30709	6.17764	6.02673	6.25989	6.38026	6.21754	6.28203	5.81148	4.76614	5.58764	6.48314	6.53047	6.73778	6.39709	6.52913	6.29769	5.87122	6.27818	6.91756	5.63184
C16.carnitine	6.59195	6.99038	7.06676	6.69822	6.9211	6.91133	7.10691	7.34653	7.33105	6.58866	6.14692	6.27298	6.81303	6.83952	7.62841	7.00447	7.34754	7.34397	7.01744	6.98673	7.61134	6.59415
C18.carnitine	6.43513	6.98386	6.88652	6.74887	6.7185	6.73488	6.55771	7.02221	7.01797	6.52971	6.12783	6.44776	6.79355	6.8453	7.11587	6.56983	7.1501	6.62727	6.89747	6.443	6.62686	6.2706
C18.1.carnitine	6.50854	6.81896	6.71845	6.54892	6.81136	6.63804	7.17788	6.8732	6.9043	6.61147	5.62293	6.09167	6.69557	7.09223	7.02083	6.6538	6.87866	7.03263	6.52941	6.74274	7.40576	6.41779
C18.2.carnitine	5.06317	5.23637	5.39285	5.31027	5.14177	5.44242	5.64966	4.20185	4.31619	NA	NA	NA	4.72822	5.64616	5.49891	5.19056	5.12072	5.39425	4.4039	5.36434	5.92126	5.10787
choline	9.62857	9.49384	9.90211	9.89312	9.90458	9.88874	9.61453	9.90584	9.90386	9.90629	9.90481	9.90329	9.89547	9.90297	9.87951	9.91872	9.89631	9.88063	9.87484	9.90016	9.89809	9.89646
acetylcholine	5.3299	5.99189	6.17983	5.56816	5.73919	4.73942	4.82671	NA	NA	5.9189	5.68974	5.21292	6.18592	6.35123	4.90584	5.10982	NA	NA	6.02581	5.09521	NA	5.37181
cotinine	6.67106	6.27431	6.79379	6.25349	6.72069	6.51714	6.20648	6.17113	6.54471	6.78409	7.22153	6.37608	6.6747	6.78846	6.03707	6.54356	6.42097	6.71299	6.5663	6.10592	6.1057	6.55768
alpha.glycerophosphocholine	8.63973	8.83262	9.47518	8.6126	8.25693	8.65638	8.99672	9.63991	9.63415	8.17256	7.81668	8.07468	8.25587	7.83248	8.15439	8.02316	8.30672	8.34149	8.05602	9.19564	9.37321	7.98255
C14.0.LPC	6.71659	6.67771	6.93067	7.06078	7.08149	7.34848	7.38592	7.48501	7.60428	7.30848	7.31963	7.52424	NA	6.94658	7.25214	7.36671	7.50715	7.02459	NA	7.42203	7.70972	7.27803
C16.1.LPC	6.67288	7.0307	6.87812	7.04865	7.35913	7.568	7.83999	7.74837	7.78849	7.46432	7.42276	7.87403	7.60435	7.62636	7.44598	7.61669	7.84023	7.73592	7.60176	7.56141	7.84405	7.65192
C16.0.LPC	7.93088	8.20823	8.18762	8.3557	8.34718	8.60891	8.46851	8.40139	8.45365	8.30377	8.157	8.55436	8.35408	8.25297	8.55724	8.64392	8.75564	8.60998	8.73229	8.51183	8.55912	8.46603
C18.2.LPC	7.16129	7.39728	7.43027	7.52532	7.71694	7.79929	7.66423	7.68627	7.78419	7.79275	7.51608	7.74627	7.62303	7.62061	7.86487	7.92592	8.05512	7.83244	7.99237	7.67898	7.72499	7.56997
C18.1.LPC	7.29531	7.46553	7.537	7.5926	7.93975	8.15688	8.24049	7.90026	7.9041	7.85653	7.66994	8.0087	8.00745	7.96797	8.19186	8.15146	8.27931	8.32098	8.33591	7.96563	8.14862	8.16623
C18.0.LPC	8.05915	8.47381	8.46196	8.48594	8.61657	8.80606	8.55391	8.59753	8.65388	8.54325	8.2589	8.58456	8.58222	8.44938	8.69954	8.76942	8.94682	8.72058	8.63685	8.6568	8.70009	8.65185
C20.4.LPC	6.84402	7.33323	7.18387	7.16442	7.28395	7.63541	7.53253	7.75036	7.87585	7.57399	7.38029	7.71474	7.30652	6.99202	7.378	7.60189	7.82366	7.71647	7.77015	7.35658	7.762	7.37076
C22.6.LPC	6.12157	7.05902	6.56634	6.82174	6.9419	7.20268	7.33482	7.43289	7.47097	7.04876	7.04992	7.31811	6.89654	6.79898	7.03733	7.1434	7.34834	7.36573	7.44623	6.83568	7.34872	6.9127
C32.0.PC	8.75081	8.78256	8.84385	8.95558	8.94483	8.98253	8.9716	8.8646	9.02396	9.04977	8.91201	8.88324	8.84115	8.91622	9.07754	9.00721	9.26551	8.98642	8.94635	8.85434	8.84532	8.80529
C32.1.PC	8.81778	8.82411	8.93179	9.06397	9.02599	9.00448	9.12285	9.10739	9.13251	9.26534	9.06248	8.96741	9.10751	9.09859	9.02962	9.05133	9.1026	8.9102	8.84723	8.9608	8.97908	8.96821
C32.2.PC	7.61655	7.6096	7.72799	7.77963	8.47074	8.10734	8.58756	8.33243	8.44767	8.60433	8.41866	8.51161	8.50789	8.58787	8.16488	8.26105	8.24956	8.19498	7.87027	8.27092	8.28147	8.38051
C34.1.PC	9.06896	9.03148	9.03583	9.1391	9.06148	9.06578	9.17789	9.14203	9.25411	9.19231	9.14448	9.0996	9.26922	9.26515	9.26623	9.25667	9.36126	9.13211	9.1278	9.01423	9.03857	9.13363
C34.2.PC	8.85182	8.84239	8.79697	8.82777	8.95306	8.86314	9.06107	8.92996	9.06748	9.13242	8.92841	8.90086	8.99934	9.12073	8.93558	8.96431	8.84288	8.96769	8.88741	8.87684	8.89973	8.96106
C34.3.PC	7.83283	7.67242	7.92759	8.10362	8.34992	8.06077	8.4877	8.18942	8.26432	8.5677	8.49715	8.33638	8.56216	8.64527	8.26143	8.29085	8.32161	8.17752	8.18807	8.02421	8.05832	8.48446
C34.4.PC	7.42738	7.51335	7.67747	7.89133	7.99884	7.98112	8.03029	8.08236	8.09585	8.28549	8.09297	8.1581	8.03629	8.16373	8.04027	8.14904	8.21613	7.90372	7.4907	8.10559	8.19613	7.97538
C36.1.PC	8.95679	8.79469	8.98544	8.92566	8.89911	8.8959	8.90184	8.82872	8.94905	8.93644	8.77342	8.71373	8.90534	9.03517	8.80175	8.78996	8.77977	8.743	8.84609	8.9444	8.95164	8.94699
C36.2.PC	8.96732	9.01698	8.94797	8.90229	8.96643	8.93533	9.04743	8.88629	9.00652	8.99152	8.83672	8.85069	9.05462	9.19058	8.98429	8.94802	8.86287	9.0098	9.00339	8.91796	8.94747	9.0134
C36.3.PC	8.66499	8.96086	8.68136	8.90251	8.8405	8.94857	8.87082	8.70097	8.75537	8.83863	8.71504	8.76383	8.81789	8.81559	8.89131	8.9987	8.87092	8.83453	8.94286	8.83147	8.87763	8.68934
C36.4.PC.A	7.4227	7.83077	7.76511	7.8551	7.96144	8.00395	7.96559	8.1472	8.16577	8.38272	8.05713	8.27821	8.11852	7.82386	8.27179	8.32883	8.3835	8.2016	8.32584	8.28738	8.30914	8.10401
C36.4.PC.B	8.78789	8.93692	8.80219	8.86807	8.81577	8.74372	8.83534	8.76022	8.83556	8.96875	8.84237	8.79812	8.77885	8.79165	8.85609	8.90106	8.95005	8.89708	8.9188	8.75439	8.81438	8.85148
C38.4.PC	8.79335	8.88977	8.74836	8.94632	8.87473	8.95423	8.65716	8.77813	8.90501	8.87015	8.73999	8.69764	8.70044	8.8958	8.83838	8.86434	9.00108	8.82404	8.81574	8.69027	8.6626	8.90711
C38.5.PC	8.71293	8.92752	8.88082	9.01685	8.86983	8.82871	8.79728	8.80855	8.83504	8.91312	8.79752	8.8167	8.67507	8.6913	8.81008	8.89647	8.90423	8.95821	8.95119	8.77698	8.77024	8.88349
C38.6.PC	8.34787	8.55272	8.4563	8.55254	8.59466	8.46354	8.41969	8.26641	8.35249	8.68856	8.4828	8.47442	8.53687	8.29425	8.48234	8.51252	8.6127	8.57609	8.67909	8.37306	8.37156	8.56563
C40.6.PC	8.26671	8.42455	8.34221	8.40296	8.6722	8.54687	8.08442	8.11362	8.17442	8.25018	8.12795	7.99136	8.46477	8.17809	8.41851	8.42146	8.61004	8.40419	8.47378	8.16858	8.11896	8.58056
C16.0.LPE	6.90433	7.05519	7.20356	7.22451	7.11566	7.5124	7.485	7.1837	7.13621	7.54245	7.11183	7.37422	7.65479	7.31614	7.53506	7.50294	7.66826	7.67429	7.65518	7.47367	7.77618	7.66071
C18.0.LPE	6.78015	7.02098	7.10472	6.96215	7.3033	7.08451	7.67807	7.50403	7.52167	7.3981	6.97037	7.23136	7.26705	7.42772	7.37303	7.4135	7.46278	7.185	7.2408	7.19351	7.40532	7.07605
C18.1.LPE	7.0343	7.28374	7.27975	7.44117	7.47444	7.81091	8.02158	7.53768	7.63788	7.5075	7.47943	7.76099	7.86812	7.84032	7.78516	7.81579	7.90087	8.08794	7.94504	7.61142	7.93498	7.74713
C20.4.LPE	6.75618	7.34821	7.33059	7.34152	7.31576	7.49388	7.49059	7.66393	7.68785	7.59179	7.18563	7.47775	7.36576	7.26003	7.82356	7.66489	7.97522	8.07585	7.79857	7.57852	7.94252	7.49686
C22.6.LPE	7.48554	7.71494	7.96339	8.0283	8.22071	8.44695	8.15881	8.16552	8.14721	8.06023	7.74312	8.04234	8.14565	8.04735	8.3311	8.35179	8.52945	8.30128	8.2858	8.22468	8.32446	8.25996
C34.1.DAG	7.10961	7.26927	7.44907	7.52779	7.7182	7.44118	7.61444	7.47617	7.43055	7.76916	7.52901	7.50861	7.68716	7.72272	7.67724	7.77878	7.66893	7.58837	7.76811	7.43018	7.70196	7.55786
C34.2.DAG	6.61612	6.86252	6.6406	6.78018	7.23256	7.00293	7.21207	7.17089	7.16845	7.25482	7.02118	7.07374	7.04813	7.17606	6.8947	6.89661	6.96114	7.07115	6.93228	6.69273	6.97685	7.07095
C36.1.DAG	7.19433	7.16072	7.24533	7.38263	7.65393	7.29342	7.36934	7.40258	7.41738	7.7425	7.46423	7.26811	7.55263	7.5066	7.29512	7.37496	7.52117	7.48091	7.32269	7.29641	7.33785	7.51071
C36.2.DAG	6.88852	7.08494	6.97714	7.1512	7.64351	7.24971	7.41664	7.22274	7.22555	7.4964	7.30498	7.17735	7.32162	7.47874	7.09683	7.10049	7.10246	7.48629	7.37602	7.10401	7.28604	7.21657
C46.0.TAG	7.24894	7.15352	7.1841	7.2228	7.13063	6.90957	7.51331	7.07969	7.01308	7.46758	7.12566	7.10698	7.45105	7.17475	7.2557	7.22595	6.89253	6.44796	NA	7.20985	7.28785	7.11714
C48.0.TAG	7.38247	7.25195	7.3603	7.42617	6.987	6.97369	7.24568	7.14993	7.20058	7.76147	7.26019	7.06148	7.75949	7.44307	7.40688	7.32083	7.04545	7.08102	7.07358	7.38065	7.51953	7.46183
C48.1.TAG	7.6631	7.75846	7.39673	7.47521	7.36604	7.24785	7.79669	7.54191	7.61339	7.98848	7.68868	7.64594	7.83689	7.77406	7.74121	7.62955	7.40479	7.09409	7.14313	7.81898	7.77308	7.6019
C48.2.TAG	7.39935	7.63514	7.00964	7.09992	7.1014	7.03549	7.72979	7.39151	7.35239	7.65151	7.54067	7.59754	7.47655	7.5324	7.19226	7.19431	7.15555	7.11504	6.94866	7.48085	7.43026	7.35006
C48.4.TAG	8.34113	8.07122	8.57371	8.60659	8.37395	8.39433	8.27922	8.56288	8.63765	8.79085	8.35818	8.42453	8.31516	8.33735	8.68618	8.48108	8.49549	8.56005	8.51345	8.47261	8.41899	8.52076
C50.0.TAG	7.31634	7.11466	7.26314	7.38738	6.90266	6.80296	7.08181	6.75308	6.79044	7.35548	6.85737	6.92236	7.55565	7.21319	7.20434	7.1601	7.00901	6.81775	6.91498	7.11518	7.07846	7.15673
C50.1.TAG	8.0807	7.86472	7.8033	7.95026	7.68285	7.61868	7.94613	7.57907	7.65058	7.98008	7.77797	7.70544	8.14464	8.14997	7.98866	7.94667	7.75999	7.45496	7.73741	7.97126	7.97173	7.86807
C50.2.TAG	7.91135	7.96289	7.40957	7.53003	7.64165	7.44425	8.0305	7.55946	7.62908	7.92303	7.86777	7.79276	7.87475	8.01894	7.70204	7.67215	7.60816	7.4561	7.39296	7.88901	7.79105	7.74028
C50.3.TAG	7.36706	7.63628	7.10293	7.11994	7.17716	7.04723	7.72844	7.34473	7.36767	7.56357	7.56189	7.59785	7.39085	7.65627	7.33608	7.31623	NA	7.28365	7.09214	7.49741	7.37543	7.39011
C52.1.TAG	7.74314	7.67505	7.62014	7.81169	7.41509	7.43442	7.60561	7.25391	7.30679	7.57319	7.32693	7.34482	7.76731	7.7636	7.81479	7.59128	7.55114	6.99921	7.38855	7.7416	7.5902	7.58443
C52.2.TAG	8.23372	8.23255	7.78421	7.93437	7.88013	7.84813	8.17007	7.57835	7.67749	7.9412	7.824	7.76134	8.03871	8.20076	7.93332	7.88684	7.92069	7.69274	7.91063	8.08147	7.86399	7.87338
C52.3.TAG	7.66734	7.90768	7.41397	7.48678	7.58755	7.48174	7.93042	7.47172	7.53683	7.62929	7.65493	7.67671	7.70665	8.08721	7.56566	7.50399	7.60578	7.54052	7.58992	7.83562	7.66687	7.58664
C52.4.TAG	7.46252	7.76564	7.1201	7.34722	7.18091	7.22373	7.24194	6.93704	7.04455	7.29972	7.43908	7.39196	7.15703	7.48096	7.40667	7.42839	7.33529	7.00698	7.38337	7.59432	7.42019	7.15357
C52.5.TAG	7.48806	7.67714	7.36125	7.34584	7.01844	7.22762	NA	7.10118	7.13084	7.02804	7.39494	7.32171	7.13618	7.19358	7.45719	7.51309	7.47348	7.15842	7.07882	7.32852	7.21083	7.00076
C52.6.TAG	7.39197	7.6131	7.31985	7.28089	7.2412	7.1768	7.26334	7.16349	7.27724	NA	7.27378	7.33898	NA	NA	7.83293	7.72972	7.54335	6.95312	7.34519	7.39791	7.45223	7.07265
C54.1.TAG	7.32078	7.19227	7.22397	7.27085	6.93376	6.95277	7.09126	6.70715	6.86762	7.13496	6.80891	6.67454	7.10328	7.08013	7.12871	6.86713	6.90661	6.23852	6.63945	7.249	6.82182	6.85849
C54.2.TAG	7.84324	7.79312	7.46988	7.54598	7.40412	7.39844	7.68743	7.08824	7.1913	7.24453	7.17803	7.20802	7.42495	7.66942	7.33053	7.23225	7.24769	6.88985	7.21168	7.73066	7.33733	7.36562
C54.3.TAG	7.99917	7.9881	7.52331	7.60548	7.68585	7.7166	7.97903	7.32479	7.35427	7.42	7.49929	7.40187	7.71573	7.98025	7.45059	7.44933	7.48116	7.64573	7.51298	7.83029	7.6251	7.55222
C54.4.TAG	7.63725	7.93585	7.53886	7.62997	7.50405	7.58322	7.59234	7.29967	7.28755	7.45212	7.54878	7.39437	7.60252	7.79421	7.53665	7.55281	7.36746	7.50552	7.52513	7.66406	7.519	7.29486
C54.5.TAG	7.68082	8.01352	7.61462	7.76865	7.37316	7.62296	7.28696	7.33353	7.41327	7.39349	7.57389	7.49415	7.5464	7.53746	7.6145	7.70636	7.68905	7.51578	7.55484	7.67543	7.61239	7.40395
C54.6.TAG	7.65673	8.21123	7.56572	7.61342	7.45802	7.5275	7.19607	7.36886	7.44922	7.5776	7.63812	7.60202	7.47723	7.39578	7.7248	7.67317	7.66156	7.48958	7.50094	7.58413	7.55957	7.41107
C54.7.TAG	7.49616	7.84351	7.30991	7.30673	7.39454	7.28833	7.41082	7.25826	7.2566	7.24499	7.47055	7.54392	7.05222	7.19691	7.44975	7.40452	7.52881	7.35272	7.29149	7.4664	7.53228	7.13378
C56.2.TAG	7.31454	7.36082	7.0435	7.15612	6.83069	7.02523	7.21075	6.74986	6.70879	NA	6.58663	6.73616	6.84723	7.12182	6.84448	6.76005	6.75424	NA	6.80203	6.9977	6.77804	6.68906
C56.4.TAG	7.52834	7.79537	7.49146	7.5784	7.25601	7.37635	7.26773	6.96684	7.05064	NA	7.24725	6.888	7.47171	7.70796	7.25768	7.15316	7.20663	7.21094	7.1768	7.38937	7.0224	7.28638
C56.5.TAG	7.74139	8.14393	7.74045	7.89484	7.45027	7.73415	7.11751	7.39228	7.39369	7.4168	7.59812	7.4478	7.49458	7.48212	7.63103	7.64638	7.64182	7.58681	7.60583	7.64157	7.43214	7.44062
C56.6.TAG	7.9513	8.41341	7.74588	7.98207	7.67636	7.89054	7.17777	7.3205	7.4475	7.58778	7.69433	7.49495	7.50812	7.5013	7.76576	7.83125	7.77833	7.64376	7.76594	7.64014	7.56028	7.44124
C56.7.TAG	7.76707	8.31418	7.65473	7.72859	7.5855	7.69116	7.46187	7.41686	7.4746	7.66136	7.74964	7.69303	7.58046	7.64811	7.64604	7.77454	7.6901	7.76203	7.71882	7.55183	7.45292	7.50098
C56.8.TAG	7.3645	7.75234	7.2685	7.36403	7.20355	7.29007	7.07192	7.23941	7.37993	7.65352	7.60684	7.52794	7.31856	7.38528	7.25619	7.25969	7.42766	7.40252	7.42552	7.16844	7.12125	7.33872
C58.6.TAG	7.77892	8.05187	7.58279	7.70355	7.37287	7.6664	6.86948	6.95168	7.08245	6.97559	7.28406	7.08219	7.01413	7.08411	7.40099	7.47725	7.32722	7.28854	7.43512	7.32654	7.05152	6.94242
C58.7.TAG	7.78355	8.35064	7.6013	7.68759	7.51453	7.91237	7.05047	7.13039	7.18834	7.21476	7.37928	7.37849	7.24036	7.3388	7.54492	7.61389	7.47657	7.55209	7.56441	7.43678	7.1593	7.01538
C58.8.TAG	7.37248	7.89374	7.372	7.41639	7.06425	7.54456	6.8039	6.81348	6.72104	6.70414	7.17617	7.01127	6.80198	6.92631	7.15977	7.1804	7.21874	7.40483	7.22348	6.93861	6.87232	6.72301
