# Supplementary material for: Cell culture-based profiling across mammals reveals DNA repair and metabolism as determinants of species longevity
Source: eLife. 2016 Nov 22;5:e19130. doi: 10.7554/eLife.19130 (PMC5148604; doi:10.7554/eLife.19130)
Supplement: Table 1—source data 1. — Regression against (A) Adult Weight; (B) Maximum Lifespan; (C) Female Time to Maturity; (D) Maximum Lifespan Residual; and (E) Female Time to Maturity Residual. ‘coef.all’, ‘p value.all’, and ‘q value.all’ refer to the regression slope, p value, and FDR-adjusted q value using all the species. ‘p value.robust’ and ‘q value.robust’ refer to the statistics after removing the potential outlier point. ‘p value.max’ and ‘q value.max’ refer to the maximal (least significant) regression p value and q value when each one of the species was left out, one at a time. Only genes with p value.robust<0.01 and p value.max<0.05 are shown. (F) Top hits identified by two or more longevity traits. The p value.robust against each of the four longevity traits (ML, FTM, MLres, and FTMres) as well as adult weight (AW) are shown. These genes were the input for pathway enrichment analysis. Pathway enrichment analysis of genes showing (G) positive and (H) negative correlation with longevity traits. Enrichment was performed using DAVID with default settings. Only the top 10 clusters are shown. (I) System level analyses of gene functions. The numbers of shared genes between longevity associated genes (either positively or negatively or both) and human aging genes, essential genes, transcription factor genes, and housekeeping genes are shown. The enrichment p value was calculated by Fisher’s exact test with two different background gene sets. DOI: http://dx.doi.org/10.7554/eLife.19130.009 [file elife-19130-table1-data1.xlsx]

## Sheet: A. AW
Trait	Gene ID	coef.all	p value.all	q value.all	p value.robust	q value.robust	p value.max	q value.max	Symbol	Description
AW	ENSMUSG00000015247	0.250652	3.26793e-05	0.103422	5.92765e-06	0.0173921	0.00014315	0.231034	Nipsnap3b	nipsnap homolog 3B (C. elegans)
AW	ENSMUSG00000029681	0.165246	9.57801e-05	0.13423	3.14709e-05	0.0283573	0.000218674	0.231034	Bcl7b	B cell CLL/lymphoma 7B
AW	ENSMUSG00000000555	0.150875	0.0258031	0.448756	4.77936e-05	0.029522	0.00095111	0.254937	Itga5	integrin alpha 5 (fibronectin receptor alpha)
AW	ENSMUSG00000057147	0.244084	0.000950317	0.2262	9.676e-05	0.0324457	0.00581122	0.339387	Dph6	diphthamine biosynthesis 6
AW	ENSMUSG00000046679	0.0695813	0.00216579	0.275581	0.000103336	0.0339017	0.001603	0.276893	C87436	expressed sequence C87436
AW	ENSMUSG00000019796	0.344913	0.000503715	0.194259	0.000114752	0.0339017	0.000616592	0.238146	Lrp11	low density lipoprotein receptor-related protein 11
AW	ENSMUSG00000051319	0.172279	0.0087357	0.351939	0.000135184	0.0341287	0.000441596	0.231034	1500011K16Rik	RIKEN cDNA 1500011K16 gene
AW	ENSMUSG00000030772	0.277489	0.00893542	0.351939	0.000135843	0.0341287	0.00146891	0.272256	Dkk3	dickkopf homolog 3 (Xenopus laevis)
AW	ENSMUSG00000034205	0.445249	0.00069173	0.211058	0.000145108	0.0342316	0.000547561	0.238146	Loxl2	lysyl oxidase-like 2
AW	ENSMUSG00000075000	0.164377	0.000425142	0.188773	0.000147319	0.0344497	0.000423982	0.231034	Nrbf2	nuclear receptor binding factor 2
AW	ENSMUSG00000014551	0.197051	0.000715765	0.213538	0.000187194	0.0369805	0.00132519	0.272256	Mrps25	mitochondrial ribosomal protein S25
AW	ENSMUSG00000026280	0.135415	0.000179101	0.154852	0.000191905	0.0369805	0.0018892	0.297613	Atg4b	autophagy related 4B, cysteine peptidase
AW	ENSMUSG00000034936	0.439769	0.0036823	0.299108	0.000200062	0.0369805	0.00334326	0.318607	Arl4d	ADP-ribosylation factor-like 4D
AW	ENSMUSG00000031931	0.137912	0.0307261	0.466138	0.000200124	0.0369805	0.00335745	0.318607	Ankrd49	ankyrin repeat domain 49
AW	ENSMUSG00000009090	0.0945785	0.00112114	0.232885	0.000211708	0.0370322	0.00360045	0.322742	Ap1b1	adaptor protein complex AP-1, beta 1 subunit
AW	ENSMUSG00000031938	0.304742	0.000619173	0.205262	0.000219651	0.0372257	0.00368005	0.322742	4931406C07Rik	RIKEN cDNA 4931406C07 gene
AW	ENSMUSG00000019806	0.309276	0.000937441	0.2262	0.00024745	0.0382654	0.00159693	0.276893	Aig1	androgen-induced 1
AW	ENSMUSG00000025207	0.296989	0.00738298	0.338145	0.000265614	0.03919	0.00598965	0.340572	Sema4g	sema domain, immunoglobulin domain (Ig), transmembrane domain (TM) and short cytoplasmic domain, (semaphorin) 4G
AW	ENSMUSG00000039086	0.170473	0.00962228	0.356244	0.000289453	0.0399702	0.00429087	0.327259	Ss18l1	synovial sarcoma translocation gene on chromosome 18-like 1
AW	ENSMUSG00000028653	0.104118	0.0338989	0.477778	0.000373275	0.0436051	0.00939304	0.357379	Trit1	tRNA isopentenyltransferase 1
AW	ENSMUSG00000030177	0.207255	0.0121441	0.375164	0.000384419	0.0436404	0.0023197	0.303324	Ccdc77	coiled-coil domain containing 77
AW	ENSMUSG00000001435	0.399681	0.000667703	0.210371	0.000387284	0.0436404	0.00242118	0.304725	Col18a1	collagen, type XVIII, alpha 1
AW	ENSMUSG00000021650	0.174507	0.00168635	0.264768	0.000394032	0.0436404	0.00368886	0.322742	Ptcd2	pentatricopeptide repeat domain 2
AW	ENSMUSG00000000142	0.250515	0.000797536	0.215408	0.000408098	0.0436404	0.0047591	0.331599	Axin2	axin2
AW	ENSMUSG00000028641	0.167351	0.0303497	0.463942	0.000412	0.0437263	0.00994334	0.358157	P3h1	prolyl 3-hydroxylase 1
AW	ENSMUSG00000050114	0.173314	0.00268735	0.286941	0.000414489	0.0437263	0.00224341	0.303173	Prdx6b	peroxiredoxin 6B
AW	ENSMUSG00000040188	0.0944487	0.0215352	0.429987	0.000418458	0.0439474	0.00119055	0.259189	Scamp2	secretory carrier membrane protein 2
AW	ENSMUSG00000038387	0.143162	0.00552051	0.323475	0.00046252	0.0455934	0.00440554	0.329854	Rras	Harvey rat sarcoma oncogene, subgroup R
AW	ENSMUSG00000011752	0.0814351	0.00101496	0.229074	0.000485471	0.046336	0.00228208	0.303324	Pgam1	phosphoglycerate mutase 1
AW	ENSMUSG00000031480	0.401188	0.0151943	0.397758	0.000563732	0.0484406	0.00300905	0.314657	Thsd1	thrombospondin, type I, domain 1
AW	ENSMUSG00000046139	0.0878214	0.0387143	0.492819	0.000565935	0.0484406	0.00175299	0.288518	Patl1	protein associated with topoisomerase II homolog 1 (yeast)
AW	ENSMUSG00000031505	0.152926	0.00338668	0.295516	0.000616571	0.0499051	0.010661	0.363549	Carkd	carbohydrate kinase domain containing
AW	ENSMUSG00000042992	0.150018	0.0519138	0.528613	0.000664658	0.0509714	0.00325994	0.317742	Loh12cr1	loss of heterozygosity, 12, chromosomal region 1 homolog (human)
AW	ENSMUSG00000061778	0.138591	0.00392735	0.30671	0.000669299	0.0509714	0.0038681	0.322742	Mospd2	motile sperm domain containing 2
AW	ENSMUSG00000001054	0.143972	0.0104212	0.362141	0.000669739	0.0509714	0.00288499	0.31317	Rmnd5b	required for meiotic nuclear division 5 homolog B (S. cerevisiae)
AW	ENSMUSG00000029179	0.191948	0.000889298	0.223597	0.000714629	0.0515334	0.00254136	0.308039	Zcchc4	zinc finger, CCHC domain containing 4
AW	ENSMUSG00000005968	0.206468	0.125736	0.636364	0.000766871	0.0528891	0.00251681	0.308039	Tuft1	tuftelin 1
AW	ENSMUSG00000001349	0.576763	0.00626562	0.329267	0.000780046	0.0530227	0.00414632	0.323682	Cnn1	calponin 1
AW	ENSMUSG00000031508	0.147885	0.00722788	0.335342	0.000849413	0.0541102	0.0121625	0.370843	Ankrd10	ankyrin repeat domain 10
AW	ENSMUSG00000027274	0.120893	0.196105	0.711525	0.000853247	0.0541293	0.0206398	0.413326	Mkks	McKusick-Kaufman syndrome
AW	ENSMUSG00000029781	0.191687	0.00462542	0.317092	0.000864307	0.0542256	0.010246	0.360937	Fkbp9	FK506 binding protein 9
AW	ENSMUSG00000028086	0.170101	0.00197654	0.272108	0.000873948	0.0542691	0.0143558	0.385987	Fbxw7	F-box and WD-40 domain protein 7
AW	ENSMUSG00000023266	0.0734073	0.192247	0.708374	0.000922605	0.0552445	0.0266851	0.429753	Frs3	fibroblast growth factor receptor substrate 3
AW	ENSMUSG00000002602	0.195289	0.00144316	0.250903	0.000932749	0.0553341	0.0082548	0.356022	Axl	AXL receptor tyrosine kinase
AW	ENSMUSG00000031148	0.209189	0.00969258	0.356671	0.000982811	0.0561974	0.00439295	0.329436	Gpkow	G patch domain and KOW motifs
AW	ENSMUSG00000032514	0.347857	0.0074858	0.33823	0.000985815	0.0562393	0.00851616	0.35606	Ttc21a	tetratricopeptide repeat domain 21A
AW	ENSMUSG00000026854	0.153398	0.00509836	0.320172	0.00103332	0.0568089	0.00399463	0.322742	Usp20	ubiquitin specific peptidase 20
AW	ENSMUSG00000024579	0.233494	0.00311893	0.292544	0.00104742	0.0568398	0.016443	0.392879	Pcyox1l	prenylcysteine oxidase 1 like
AW	ENSMUSG00000031256	0.162395	0.00676447	0.332793	0.00107778	0.0571679	0.00473326	0.331599	Cstf2	cleavage stimulation factor, 3' pre-RNA subunit 2
AW	ENSMUSG00000028557	0.103539	0.00394395	0.30671	0.00108027	0.0571679	0.00858882	0.35606	Rnf11	ring finger protein 11
AW	ENSMUSG00000040219	0.639815	0.00292661	0.290464	0.00108137	0.0571679	0.00398317	0.322742	Ttc12	tetratricopeptide repeat domain 12
AW	ENSMUSG00000035390	0.451988	0.00311042	0.292544	0.00111485	0.0576434	0.00258746	0.310086	Brsk1	BR serine/threonine kinase 1
AW	ENSMUSG00000015027	0.146628	0.0987244	0.602493	0.00115842	0.058344	0.00364947	0.322742	Galns	galactosamine (N-acetyl)-6-sulfate sulfatase
AW	ENSMUSG00000029616	0.190828	0.00337471	0.295166	0.00115915	0.058344	0.00563334	0.337827	Erp29	endoplasmic reticulum protein 29
AW	ENSMUSG00000059851	0.100323	0.0860519	0.583499	0.00118522	0.0583843	0.00595358	0.340428	Suv420h2	suppressor of variegation 4-20 homolog 2 (Drosophila)
AW	ENSMUSG00000053198	0.429247	0.00461263	0.317043	0.00120499	0.0585295	0.0058823	0.339387	Prx	periaxin
AW	ENSMUSG00000041396	0.184786	0.00745246	0.338145	0.00120629	0.0585295	0.0156825	0.389542	Mettl18	methyltransferase like 18
AW	ENSMUSG00000032042	0.0755699	0.00466786	0.317289	0.0012593	0.0589938	0.00777327	0.352572	Srpr	signal recognition particle receptor ('docking protein')
AW	ENSMUSG00000026761	0.145404	0.0157478	0.398945	0.00127945	0.0589938	0.0387506	0.465688	Orc4	origin recognition complex, subunit 4
AW	ENSMUSG00000024803	0.599812	0.00414662	0.310905	0.00129669	0.0590617	0.00495092	0.331599	Ankrd1	ankyrin repeat domain 1 (cardiac muscle)
AW	ENSMUSG00000022836	0.45006	0.00731864	0.337986	0.00133681	0.0597018	0.0105858	0.363549	Mylk	myosin, light polypeptide kinase
AW	ENSMUSG00000026662	0.0799066	0.0863169	0.58377	0.00135797	0.0600933	0.0241627	0.418322	Sephs1	selenophosphate synthetase 1
AW	ENSMUSG00000022905	0.130499	0.00505787	0.320172	0.00140306	0.0603588	0.00870107	0.356095	Kpna1	karyopherin (importin) alpha 1
AW	ENSMUSG00000019715	0.115015	0.0223321	0.4325	0.00141273	0.0603588	0.00414722	0.323682	Gle1	GLE1 RNA export mediator (yeast)
AW	ENSMUSG00000001150	0.107038	0.00645253	0.331155	0.00142538	0.0603588	0.0203279	0.41057	Mcm3ap	minichromosome maintenance deficient 3 (S. cerevisiae) associated protein
AW	ENSMUSG00000037965	0.132983	0.00487345	0.320172	0.0014358	0.060479	0.0103997	0.361656	Zc3h7a	zinc finger CCCH type containing 7 A
AW	ENSMUSG00000024955	0.0889191	0.0056051	0.323475	0.00145343	0.060758	0.00478452	0.331599	Esrra	estrogen related receptor, alpha
AW	ENSMUSG00000028292	0.0752054	0.0321476	0.47172	0.0014908	0.0612967	0.00527322	0.333059	Rars2	arginyl-tRNA synthetase 2, mitochondrial
AW	ENSMUSG00000023411	0.206975	0.00363468	0.299108	0.00150599	0.0614124	0.0058912	0.339387	Nfatc4	nuclear factor of activated T cells, cytoplasmic, calcineurin dependent 4
AW	ENSMUSG00000024293	0.117363	0.00359904	0.298946	0.00151523	0.0614124	0.00914405	0.357379	Esco1	establishment of cohesion 1 homolog 1 (S. cerevisiae)
AW	ENSMUSG00000028889	0.111195	0.0211557	0.429564	0.00154889	0.0620944	0.00871288	0.356095	Yrdc	yrdC domain containing (E.coli)
AW	ENSMUSG00000038777	0.200748	0.00337638	0.295166	0.00161463	0.0627994	0.00529228	0.333059	Sema6c	sema domain, transmembrane domain (TM), and cytoplasmic domain, (semaphorin) 6C
AW	ENSMUSG00000031154	0.0893859	0.00508474	0.320172	0.00162212	0.0628893	0.0041328	0.323682	Otud5	OTU domain containing 5
AW	ENSMUSG00000056602	0.569104	0.00395757	0.307088	0.00163931	0.0629306	0.0128888	0.374888	Fry	furry homolog (Drosophila)
AW	ENSMUSG00000039278	0.588921	0.0193725	0.419872	0.00164503	0.0629306	0.0283191	0.435601	Pcsk1n	proprotein convertase subtilisin/kexin type 1 inhibitor
AW	ENSMUSG00000027510	0.263432	0.0171166	0.406672	0.00172361	0.063978	0.00928397	0.357379	Rbm38	RNA binding motif protein 38
AW	ENSMUSG00000071073	0.253014	0.00441711	0.312299	0.00173147	0.063978	0.0197779	0.409137	Lrrc73	leucine rich repeat containing 73
AW	ENSMUSG00000076435	0.307589	0.0113085	0.367606	0.00173789	0.0639872	0.0208802	0.413369	Acsf2	acyl-CoA synthetase family member 2
AW	ENSMUSG00000034295	0.427221	0.146425	0.660653	0.00176944	0.0640097	0.0147481	0.388908	Fhod3	formin homology 2 domain containing 3
AW	ENSMUSG00000024875	0.0912393	0.0111198	0.367606	0.0018114	0.0645309	0.0136268	0.380781	Yif1a	Yip1 interacting factor homolog A (S. cerevisiae)
AW	ENSMUSG00000027603	0.218742	0.00357512	0.298946	0.00181311	0.0645309	0.0110665	0.363797	Ggt7	gamma-glutamyltransferase 7
AW	ENSMUSG00000024736	0.109969	0.0399125	0.497536	0.00186674	0.0650931	0.0111622	0.364148	Tmem132a	transmembrane protein 132A
AW	ENSMUSG00000045216	0.313851	0.00284793	0.288236	0.00189533	0.0653278	0.00581527	0.339387	Hs6st1	heparan sulfate 6-O-sulfotransferase 1
AW	ENSMUSG00000040712	0.0968379	0.00360117	0.298946	0.00192388	0.065823	0.00443779	0.330686	Camta2	calmodulin binding transcription activator 2
AW	ENSMUSG00000021458	0.369891	0.00424979	0.311274	0.00192546	0.065823	0.0219654	0.414499	2010111I01Rik	RIKEN cDNA 2010111I01 gene
AW	ENSMUSG00000030352	0.127622	0.0451645	0.51375	0.00192999	0.0658935	0.00426345	0.327038	Tspan9	tetraspanin 9
AW	ENSMUSG00000021257	0.167274	0.0187966	0.417759	0.00197586	0.0664076	0.00795855	0.354173	Angel1	angel homolog 1 (Drosophila)
AW	ENSMUSG00000025260	0.130123	0.00517083	0.320173	0.00199266	0.066613	0.0127148	0.373766	Hsd17b10	hydroxysteroid (17-beta) dehydrogenase 10
AW	ENSMUSG00000002015	0.144059	0.00460486	0.316973	0.00205017	0.0673516	0.0280473	0.435601	Bcap31	B cell receptor associated protein 31
AW	ENSMUSG00000026270	0.0585183	0.360967	0.811872	0.00207728	0.0675919	0.0111419	0.363993	Capn10	calpain 10
AW	ENSMUSG00000033707	0.174306	0.0913911	0.591738	0.00209827	0.0676998	0.0453523	0.483768	Lrrc24	leucine rich repeat containing 24
AW	ENSMUSG00000048832	0.0936635	0.0446582	0.511707	0.00212568	0.0680232	0.00716114	0.350187	Vps37c	vacuolar protein sorting 37C (yeast)
AW	ENSMUSG00000036825	0.259873	0.00935406	0.355301	0.00217629	0.0680309	0.0135385	0.380504	Ssx2ip	synovial sarcoma, X breakpoint 2 interacting protein
AW	ENSMUSG00000025340	0.122104	0.00952865	0.356244	0.00217699	0.0680309	0.00979722	0.357379	Rabgef1	RAB guanine nucleotide exchange factor (GEF) 1
AW	ENSMUSG00000017861	0.181061	0.240558	0.742049	0.00218109	0.0680309	0.0151226	0.389542	Mybl2	myeloblastosis oncogene-like 2
AW	ENSMUSG00000026043	0.374861	0.00346915	0.298732	0.00220703	0.0683945	0.0143459	0.385941	Col3a1	collagen, type III, alpha 1
AW	ENSMUSG00000073609	0.167619	0.00576934	0.325923	0.00227218	0.0689183	0.00584736	0.339387	D2hgdh	D-2-hydroxyglutarate dehydrogenase
AW	ENSMUSG00000035311	0.150454	0.032423	0.47327	0.00231027	0.0694534	0.0176283	0.39998	Gnptab	N-acetylglucosamine-1-phosphate transferase, alpha and beta subunits
AW	ENSMUSG00000068196	0.37349	0.0117852	0.372564	0.00232498	0.0696973	0.00515849	0.332188	Col8a1	collagen, type VIII, alpha 1
AW	ENSMUSG00000041423	0.357406	0.012402	0.375823	0.00232852	0.0697001	0.00499389	0.331599	Paqr6	progestin and adipoQ receptor family member VI
AW	ENSMUSG00000055044	0.265599	0.0157508	0.398945	0.002344	0.0698481	0.0124628	0.372856	Pdlim1	PDZ and LIM domain 1 (elfin)
AW	ENSMUSG00000021576	0.0777744	0.0260011	0.448756	0.00237406	0.0701831	0.00965585	0.357379	Pdcd6	programmed cell death 6
AW	ENSMUSG00000034586	0.686502	0.0113734	0.36778	0.00237858	0.0702279	0.00977529	0.357379	Hid1	HID1 domain containing
AW	ENSMUSG00000018906	0.225317	0.0477252	0.521214	0.00242702	0.0708934	0.0147725	0.388947	P4ha2	procollagen-proline, 2-oxoglutarate 4-dioxygenase (proline 4-hydroxylase), alpha II polypeptide
AW	ENSMUSG00000032905	0.0741423	0.168784	0.682951	0.00247477	0.0709994	0.0108509	0.363797	Atg12	autophagy related 12
AW	ENSMUSG00000075033	0.216765	0.008382	0.348501	0.00247579	0.0709994	0.0100179	0.358454	Nxpe3	neurexophilin and PC-esterase domain family, member 3
AW	ENSMUSG00000021514	0.0713541	0.198548	0.713413	0.00249596	0.0713543	0.0403797	0.46805	Zfp369	zinc finger protein 369
AW	ENSMUSG00000033096	0.0387462	0.669067	0.926658	0.0025089	0.0713543	0.0198381	0.409137	Apmap	adipocyte plasma membrane associated protein
AW	ENSMUSG00000039048	0.180988	0.00582022	0.32602	0.0025105	0.0713543	0.00896027	0.357379	Foxred1	FAD-dependent oxidoreductase domain containing 1
AW	ENSMUSG00000029621	0.0843645	0.00781956	0.341796	0.00252702	0.0713914	0.0186841	0.406311	Arpc1a	actin related protein 2/3 complex, subunit 1A
AW	ENSMUSG00000030401	0.248638	0.00699101	0.335342	0.00254663	0.0716724	0.00652344	0.345298	Rtn2	reticulon 2 (Z-band associated protein)
AW	ENSMUSG00000005103	0.124577	0.0144865	0.392735	0.00257144	0.0719649	0.00885256	0.357041	Wdr1	WD repeat domain 1
AW	ENSMUSG00000019822	0.208023	0.00551315	0.323475	0.00257231	0.0719649	0.0159419	0.389542	Smpd2	sphingomyelin phosphodiesterase 2, neutral
AW	ENSMUSG00000029136	0.132456	0.0949626	0.5964	0.00257764	0.0719713	0.013666	0.380998	Rbks	ribokinase
AW	ENSMUSG00000103316	0.123493	0.0115586	0.368429	0.00258574	0.072083	0.00667933	0.347629
AW	ENSMUSG00000054792	0.20558	0.00494607	0.320172	0.00261001	0.0725395	0.0149309	0.389542	Klhl18	kelch-like 18
AW	ENSMUSG00000078139	0.184826	0.00556288	0.323475	0.0026188	0.0725755	0.0160342	0.389542	AK157302	cDNA sequence AK157302
AW	ENSMUSG00000021772	0.172094	0.0849093	0.581583	0.00262136	0.0725755	0.0334273	0.456863	Nkiras1	NFKB inhibitor interacting Ras-like protein 1
AW	ENSMUSG00000021838	0.12909	0.00990869	0.356925	0.00265606	0.0728203	0.00698989	0.348758	Samd4	sterile alpha motif domain containing 4
AW	ENSMUSG00000063410	0.147046	0.0136588	0.385478	0.00266825	0.0728203	0.013561	0.380504	Stk24	serine/threonine kinase 24
AW	ENSMUSG00000030246	0.309539	0.00763791	0.338905	0.00269633	0.073079	0.0166263	0.3952	Ldhb	lactate dehydrogenase B
AW	ENSMUSG00000019873	0.14123	0.0146835	0.39289	0.00269876	0.073079	0.0110288	0.363797	Reep3	receptor accessory protein 3
AW	ENSMUSG00000024395	0.122059	0.0274044	0.454562	0.00273249	0.0735284	0.0169698	0.397244	Lims2	LIM and senescent cell antigen like domains 2
AW	ENSMUSG00000059995	0.0567607	0.121875	0.631225	0.00276725	0.0736444	0.019914	0.409137	Atxn7l3	ataxin 7-like 3
AW	ENSMUSG00000027204	0.195387	0.0304893	0.464564	0.0027994	0.0737884	0.00952012	0.357379	Fbn1	fibrillin 1
AW	ENSMUSG00000032555	0.13329	0.0184478	0.416457	0.00286839	0.0741964	0.0145534	0.387822	Topbp1	topoisomerase (DNA) II binding protein 1
AW	ENSMUSG00000028843	0.156209	0.00710156	0.335342	0.00295559	0.0753777	0.0186206	0.405862	Sh3bgrl3	SH3 domain binding glutamic acid-rich protein-like 3
AW	ENSMUSG00000000827	0.128066	0.01876	0.417759	0.00295917	0.0753777	0.00789083	0.353806	Tpd52l2	tumor protein D52-like 2
AW	ENSMUSG00000025809	0.163219	0.00557342	0.323475	0.00297767	0.075578	0.0231698	0.417729	Itgb1	integrin beta 1 (fibronectin receptor beta)
AW	ENSMUSG00000033373	0.125672	0.0217846	0.430013	0.0030145	0.0759613	0.00865423	0.35606	Fntb	farnesyltransferase, CAAX box, beta
AW	ENSMUSG00000034292	0.0962584	0.068985	0.556244	0.00301625	0.0759644	0.0120855	0.370843	Traf3ip1	TRAF3 interacting protein 1
AW	ENSMUSG00000021831	0.225943	0.0180253	0.413155	0.00303759	0.076196	0.0103118	0.361628	Ero1l	ERO1-like (S. cerevisiae)
AW	ENSMUSG00000025656	0.401881	0.00411865	0.310905	0.00309829	0.0769392	0.00798168	0.354173	Arhgef9	CDC42 guanine nucleotide exchange factor (GEF) 9
AW	ENSMUSG00000020747	0.0957421	0.0278722	0.456227	0.003145	0.0772176	0.0113271	0.365091	2310067B10Rik	RIKEN cDNA 2310067B10 gene
AW	ENSMUSG00000040354	0.128443	0.0110392	0.367178	0.00320833	0.0775567	0.00944875	0.357379	Mars	methionine-tRNA synthetase
AW	ENSMUSG00000025780	0.380109	0.0115558	0.368429	0.00322276	0.0777385	0.0128352	0.37472	Itih5	inter-alpha (globulin) inhibitor H5
AW	ENSMUSG00000050315	0.416687	0.0242293	0.44145	0.0033122	0.078775	0.0394932	0.466229	Synpo2	synaptopodin 2
AW	ENSMUSG00000037752	0.186059	0.0485015	0.523127	0.00332543	0.0788408	0.0245003	0.418855	Xkr8	X Kell blood group precursor related family member 8 homolog
AW	ENSMUSG00000042035	0.17657	0.22439	0.731069	0.00339625	0.0794251	0.00953441	0.357379	Igsf3	immunoglobulin superfamily, member 3
AW	ENSMUSG00000037458	0.09334	0.021631	0.430013	0.00344617	0.0797734	0.0105704	0.363549	Azin1	antizyme inhibitor 1
AW	ENSMUSG00000009112	0.234494	0.0440842	0.509737	0.00349115	0.0802762	0.0187564	0.407103	Bcl2l13	BCL2-like 13 (apoptosis facilitator)
AW	ENSMUSG00000049866	0.330556	0.0299219	0.463791	0.00349593	0.0802762	0.014689	0.388908	Arl4c	ADP-ribosylation factor-like 4C
AW	ENSMUSG00000033126	0.248922	0.0478221	0.521214	0.00353767	0.0806062	0.01968	0.409137	Ybey	ybeY metallopeptidase
AW	ENSMUSG00000041236	0.101223	0.0132685	0.383678	0.00356194	0.0810842	0.0186272	0.405862	Vps41	vacuolar protein sorting 41 (yeast)
AW	ENSMUSG00000075266	0.177918	0.107364	0.612258	0.00366406	0.0815211	0.0159966	0.389542	Cenpw	centromere protein W
AW	ENSMUSG00000030538	0.0955839	0.0070813	0.335342	0.00368005	0.0816557	0.0287609	0.437135	Cib1	calcium and integrin binding 1 (calmyrin)
AW	ENSMUSG00000027984	0.0741676	0.0373299	0.489786	0.00374088	0.0819103	0.0196501	0.409137	Hadh	hydroxyacyl-Coenzyme A dehydrogenase
AW	ENSMUSG00000024426	0.0991183	0.0754691	0.566183	0.003795	0.0819752	0.0335364	0.456913	Atat1	alpha tubulin acetyltransferase 1
AW	ENSMUSG00000005881	0.114747	0.00901395	0.351939	0.00380845	0.0819752	0.0312858	0.449849	Ergic3	ERGIC and golgi 3
AW	ENSMUSG00000027495	0.0723752	0.419258	0.843203	0.00382013	0.0821136	0.00745266	0.351655	Fam210b	family with sequence similarity 210, member B
AW	ENSMUSG00000003452	0.513363	0.00641017	0.331051	0.00386549	0.0823345	0.0251954	0.421492	Bicd1	bicaudal D homolog 1 (Drosophila)
AW	ENSMUSG00000041936	0.373445	0.00265293	0.286941	0.00388221	0.0825784	0.026677	0.429753	Agrn	agrin
AW	ENSMUSG00000067787	0.126751	0.00747671	0.338145	0.00389455	0.0825806	0.0119607	0.370623	Blcap	bladder cancer associated protein homolog (human)
AW	ENSMUSG00000030407	0.250879	0.00958228	0.356244	0.00396562	0.0828509	0.02542	0.422304	Qpctl	glutaminyl-peptide cyclotransferase-like
AW	ENSMUSG00000026942	0.139185	0.0210921	0.429016	0.00396781	0.0828599	0.00852569	0.35606	Traf2	TNF receptor-associated factor 2
AW	ENSMUSG00000002210	0.0960623	0.0231397	0.437129	0.00397604	0.0828841	0.0158076	0.389542	Smg9	smg-9 homolog, nonsense mediated mRNA decay factor (C. elegans)
AW	ENSMUSG00000038425	0.317587	0.00304417	0.292544	0.00399681	0.0831327	0.00863701	0.35606	Poli	polymerase (DNA directed), iota
AW	ENSMUSG00000032324	0.233798	0.00709114	0.335342	0.00403112	0.0833733	0.0213573	0.413779	Tspan3	tetraspanin 3
AW	ENSMUSG00000021361	0.130256	0.013132	0.382431	0.00404707	0.083401	0.025462	0.422304	Tmem14c	transmembrane protein 14C
AW	ENSMUSG00000031939	0.21942	0.00862495	0.351939	0.00406103	0.0834789	0.00843446	0.35606	Taf1d	TATA box binding protein (Tbp)-associated factor, RNA polymerase I, D
AW	ENSMUSG00000030677	0.136272	0.185396	0.70121	0.00407663	0.0836647	0.0249991	0.420525	Kif22	kinesin family member 22
AW	ENSMUSG00000012422	0.060545	0.304008	0.781881	0.00408286	0.0836647	0.00892738	0.357379	Tmem167	transmembrane protein 167
AW	ENSMUSG00000023391	0.366744	0.00709158	0.335342	0.00408759	0.0836647	0.00961114	0.357379	Dlx2	distal-less homeobox 2
AW	ENSMUSG00000015133	0.127893	0.0376016	0.489843	0.00413452	0.0839646	0.0410097	0.469625	Lrrk1	leucine-rich repeat kinase 1
AW	ENSMUSG00000042570	0.0915508	0.177344	0.691593	0.00419957	0.0840225	0.0139645	0.381777	Mier2	mesoderm induction early response 1, family member 2
AW	ENSMUSG00000027583	0.22125	0.0803596	0.573107	0.00426113	0.0844889	0.0262334	0.427465	Zbtb46	zinc finger and BTB domain containing 46
AW	ENSMUSG00000020974	0.120424	0.195162	0.710729	0.0043036	0.0845936	0.010876	0.363797	Pole2	polymerase (DNA directed), epsilon 2 (p59 subunit)
AW	ENSMUSG00000002983	0.182516	0.0490214	0.524097	0.00433507	0.0848665	0.0141904	0.384128	Relb	avian reticuloendotheliosis viral (v-rel) oncogene related B
AW	ENSMUSG00000037703	0.115704	0.0694639	0.556244	0.0043598	0.0850809	0.00832146	0.35606	Lzts3	leucine zipper, putative tumor suppressor family member 3
AW	ENSMUSG00000036211	0.390977	0.0950274	0.5964	0.0043795	0.085274	0.0242824	0.418447	Hist1h1t	histone cluster 1, H1t
AW	ENSMUSG00000020492	0.137384	0.0449071	0.512187	0.00440947	0.0856445	0.0150146	0.389542	Ska2	spindle and kinetochore associated complex subunit 2
AW	ENSMUSG00000019362	0.0710275	0.222197	0.730103	0.00442973	0.0857914	0.0141633	0.383889	D8Ertd738e	DNA segment, Chr 8, ERATO Doi 738, expressed
AW	ENSMUSG00000094483	0.0752596	0.0374558	0.489843	0.00444947	0.0860652	0.0127413	0.373902	Purb	purine rich element binding protein B
AW	ENSMUSG00000034247	0.0631176	0.0954329	0.59671	0.00455699	0.0867234	0.0376917	0.46257	Plekhm1	pleckstrin homology domain containing, family M (with RUN domain) member 1
AW	ENSMUSG00000047879	0.096635	0.00631506	0.329267	0.00459777	0.0868581	0.0223272	0.41475	Usp14	ubiquitin specific peptidase 14
AW	ENSMUSG00000051329	0.138484	0.0174475	0.4091	0.00463566	0.0870809	0.010928	0.363797	Nup160	nucleoporin 160
AW	ENSMUSG00000031691	0.0823251	0.00994556	0.356925	0.00469682	0.0875317	0.0168374	0.39543	Tnpo2	transportin 2 (importin 3, karyopherin beta 2b)
AW	ENSMUSG00000051232	0.117156	0.0122809	0.375164	0.00471074	0.0876296	0.0215097	0.413779	Tmem199	transmembrane protein 199
AW	ENSMUSG00000035285	0.293852	0.0189751	0.417839	0.00472763	0.0877655	0.0104971	0.362591	Nat14	N-acetyltransferase 14
AW	ENSMUSG00000028370	0.218424	0.154395	0.669304	0.00473742	0.0877891	0.0308783	0.449255	Pappa	pregnancy-associated plasma protein A
AW	ENSMUSG00000032038	0.144302	0.126052	0.636565	0.00478078	0.0881495	0.012207	0.370843	St3gal4	ST3 beta-galactoside alpha-2,3-sialyltransferase 4
AW	ENSMUSG00000020415	0.17997	0.184273	0.699951	0.00481199	0.0883878	0.0252203	0.421492	Pttg1	pituitary tumor-transforming gene 1
AW	ENSMUSG00000028085	0.129201	0.0208567	0.428756	0.00486583	0.0885195	0.0311593	0.449808	Gatb	glutamyl-tRNA(Gln) amidotransferase, subunit B
AW	ENSMUSG00000013160	0.0650142	0.0494169	0.525281	0.00487702	0.0885195	0.0260766	0.426279	Atp6v0d1	ATPase, H+ transporting, lysosomal V0 subunit D1
AW	ENSMUSG00000074909	0.0924147	0.0197648	0.422876	0.00489153	0.0885195	0.0283521	0.435601	Ranbp6	RAN binding protein 6
AW	ENSMUSG00000022089	-0.0305043	0.557736	0.894932	0.0049331	0.0888631	0.0468122	0.486615	Bin3	bridging integrator 3
AW	ENSMUSG00000055681	0.0653185	0.112892	0.619749	0.0049532	0.088963	0.0106145	0.363549	Cope	coatomer protein complex, subunit epsilon
AW	ENSMUSG00000001552	0.190056	0.0116917	0.371107	0.00495871	0.088963	0.0275619	0.433865	Jup	junction plakoglobin
AW	ENSMUSG00000024242	0.216248	0.0166622	0.402807	0.00496018	0.088963	0.0371639	0.46257	Map4k3	mitogen-activated protein kinase kinase kinase kinase 3
AW	ENSMUSG00000022422	0.449859	0.00647685	0.331155	0.00506903	0.0897983	0.0218694	0.414201	Dscc1	defective in sister chromatid cohesion 1 homolog (S. cerevisiae)
AW	ENSMUSG00000050379	0.229304	0.0414201	0.501459	0.00508927	0.0899193	0.0218684	0.414201	Sept6	septin 6
AW	ENSMUSG00000032667	0.179533	0.0222468	0.431694	0.00511616	0.0900491	0.0248855	0.420234	Pon2	paraoxonase 2
AW	ENSMUSG00000042831	0.133296	0.017363	0.40796	0.00518961	0.0902696	0.0395057	0.466229	Alkbh6	alkB, alkylation repair homolog 6 (E. coli)
AW	ENSMUSG00000024298	0.370536	0.015782	0.398945	0.00519973	0.0902696	0.027919	0.435146	Zfp871	zinc finger protein 871
AW	ENSMUSG00000025779	0.325151	0.0164892	0.40254	0.00520554	0.0902696	0.0146994	0.388908	Ly96	lymphocyte antigen 96
AW	ENSMUSG00000026798	0.200273	0.0116362	0.370347	0.00521022	0.0902696	0.0173201	0.397961	Coq4	coenzyme Q4 homolog (yeast)
AW	ENSMUSG00000020910	0.184133	0.0157685	0.398945	0.00523353	0.0903959	0.0164352	0.392879	Adprm	ADP-ribose/CDP-alcohol diphosphatase, manganese dependent
AW	ENSMUSG00000031023	0.120766	0.0941501	0.596235	0.00525685	0.0903966	0.0276963	0.43412	Akip1	A kinase (PRKA) interacting protein 1
AW	ENSMUSG00000034681	0.0519516	0.0497809	0.525281	0.00528766	0.0905925	0.0115055	0.366405	Rnps1	ribonucleic acid binding protein S1
AW	ENSMUSG00000057762	0.027651	0.349481	0.804708	0.005351	0.0911953	0.0168549	0.39543	Gm6169	predicted gene 6169
AW	ENSMUSG00000022472	-0.023281	0.78613	0.95781	0.005358	0.0912668	0.0467093	0.486615	Desi1	desumoylating isopeptidase 1
AW	ENSMUSG00000026098	0.139103	0.0299595	0.463791	0.00542448	0.0917859	0.0124004	0.372856	Pms1	postmeiotic segregation increased 1 (S. cerevisiae)
AW	ENSMUSG00000063052	0.12798	0.0347604	0.478572	0.00542485	0.0917859	0.011914	0.370153	Lrrc40	leucine rich repeat containing 40
AW	ENSMUSG00000032977	0.162628	0.011098	0.367606	0.00551979	0.0921059	0.0294895	0.441763	Fam207a	family with sequence similarity 207, member A
AW	ENSMUSG00000000384	0.0787689	0.0339639	0.477778	0.00551994	0.0921059	0.0359658	0.460799	Tbrg4	transforming growth factor beta regulated gene 4
AW	ENSMUSG00000029672	0.137717	0.0593213	0.542047	0.00554744	0.0921858	0.0228982	0.41667	Fam3c	family with sequence similarity 3, member C
AW	ENSMUSG00000039234	0.0917965	0.044484	0.511269	0.00562218	0.0928399	0.0198795	0.409137	Sec24d	Sec24 related gene family, member D (S. cerevisiae)
AW	ENSMUSG00000028411	0.12231	0.044864	0.512069	0.0056964	0.0929467	0.0244587	0.418823	Aptx	aprataxin
AW	ENSMUSG00000052934	0.267882	0.0110399	0.367178	0.00570807	0.0929467	0.0112236	0.364378	Fbxo31	F-box protein 31
AW	ENSMUSG00000027953	0.0532585	0.26808	0.759072	0.00577212	0.093423	0.0448133	0.482666	Slc50a1	solute carrier family 50 (sugar transporter), member 1
AW	ENSMUSG00000021270	0.145597	0.0114801	0.368125	0.00580224	0.093613	0.0316194	0.451315	Hsp90aa1	heat shock protein 90, alpha (cytosolic), class A member 1
AW	ENSMUSG00000062115	0.0897423	0.0306699	0.466136	0.00584181	0.0937158	0.017257	0.397961	Rai1	retinoic acid induced 1
AW	ENSMUSG00000022571	0.165944	0.0146045	0.392735	0.0059012	0.0941965	0.016775	0.395245	Pycrl	pyrroline-5-carboxylate reductase-like
AW	ENSMUSG00000020814	0.22733	0.0161421	0.401214	0.00592384	0.0944614	0.014217	0.384235	Mxra7	matrix-remodelling associated 7
AW	ENSMUSG00000027429	0.146648	0.010952	0.366459	0.00596744	0.0946984	0.0220956	0.41455	Sec23b	SEC23B (S. cerevisiae)
AW	ENSMUSG00000022515	0.0940004	0.0149986	0.39579	0.0060084	0.0948434	0.0202918	0.41057	Anks3	ankyrin repeat and sterile alpha motif domain containing 3
AW	ENSMUSG00000074796	0.373712	0.0140135	0.387834	0.0060318	0.0950882	0.0190623	0.407587	Slc4a11	solute carrier family 4, sodium bicarbonate transporter-like, member 11
AW	ENSMUSG00000031756	0.289342	0.0250279	0.444442	0.00603692	0.0951062	0.0372107	0.46257	Cenpn	centromere protein N
AW	ENSMUSG00000028757	0.0751128	0.0109505	0.366459	0.00613288	0.0955116	0.0165955	0.394868	Ddost	dolichyl-di-phosphooligosaccharide-protein glycotransferase
AW	ENSMUSG00000021994	0.345813	0.0197548	0.422876	0.00613618	0.0955116	0.0282621	0.435601	Wnt5a	wingless-type MMTV integration site family, member 5A
AW	ENSMUSG00000030689	0.0752122	0.0974031	0.6001	0.00616247	0.0956877	0.0206647	0.413326	Ino80e	INO80 complex subunit E
AW	ENSMUSG00000024045	0.0524518	0.25939	0.753545	0.0062026	0.0958463	0.0203084	0.41057	Akap8	A kinase (PRKA) anchor protein 8
AW	ENSMUSG00000022400	0.0476129	0.188564	0.704658	0.00635431	0.0970091	0.0207687	0.413326	Rbx1	ring-box 1
AW	ENSMUSG00000031150	0.078543	0.0711649	0.558198	0.00643232	0.0971475	0.0168748	0.395697	Ccdc120	coiled-coil domain containing 120
AW	ENSMUSG00000038384	0.0569255	0.0165243	0.402807	0.00645013	0.0972074	0.0174183	0.397961	Setd1b	SET domain containing 1B
AW	ENSMUSG00000027438	0.234176	0.0162632	0.401892	0.00648574	0.0975562	0.0398387	0.466859	Napb	N-ethylmaleimide sensitive fusion protein attachment protein beta
AW	ENSMUSG00000032328	0.0996682	0.13196	0.645652	0.00665674	0.0984955	0.0198733	0.409137	Tmem30a	transmembrane protein 30A
AW	ENSMUSG00000030403	0.0910514	0.0330223	0.474828	0.00666466	0.0984955	0.0150038	0.389542	Vasp	vasodilator-stimulated phosphoprotein
AW	ENSMUSG00000028919	0.30573	0.0712316	0.558198	0.00674436	0.0988669	0.0181289	0.404149	Arhgef19	Rho guanine nucleotide exchange factor (GEF) 19
AW	ENSMUSG00000031253	0.366247	0.0403854	0.498493	0.00680086	0.0991818	0.0226383	0.416277	Srpx2	sushi-repeat-containing protein, X-linked 2
AW	ENSMUSG00000020451	0.133821	0.0232249	0.437129	0.00681933	0.0991948	0.0340297	0.457281	Limk2	LIM motif-containing protein kinase 2
AW	ENSMUSG00000030199	0.195534	0.0229005	0.436196	0.00682213	0.0991948	0.0298442	0.443506	Etv6	ets variant 6
AW	ENSMUSG00000097485	0.155883	0.0251236	0.444732	0.00684089	0.0992834	0.0178303	0.401895	Cdk2ap2	CDK2-associated protein 2
AW	ENSMUSG00000062054	0.0884186	0.0181038	0.414098	0.00687653	0.0994819	0.0417317	0.472421	Iah1	isoamyl acetate-hydrolyzing esterase 1 homolog (S. cerevisiae)
AW	ENSMUSG00000063543	0.0689924	0.0342127	0.477868	0.00692998	0.0995551	0.0293166	0.440124	Gm5616	predicted gene 5616
AW	ENSMUSG00000026858	0.151021	0.00974315	0.356925	0.0070226	0.100061	0.0134944	0.380504	Fam73b	family with sequence similarity 73, member B
AW	ENSMUSG00000024535	0.16162	0.0360945	0.483578	0.00704782	0.10017	0.0404173	0.46805	Snx24	sorting nexing 24
AW	ENSMUSG00000019173	0.0159629	0.492426	0.871675	0.0071028	0.100517	0.0191722	0.407587	Rab5c	RAB5C, member RAS oncogene family
AW	ENSMUSG00000080316	0.144915	0.0626321	0.544143	0.00710406	0.100517	0.0313897	0.450399	Spaca6	sperm acrosome associated 6
AW	ENSMUSG00000024542	0.113182	0.0388363	0.492881	0.00724414	0.10122	0.0331784	0.456142	Cep192	centrosomal protein 192
AW	ENSMUSG00000075528	0.11636	0.0166301	0.402807	0.0073038	0.101584	0.0375725	0.46257	Aarsd1	alanyl-tRNA synthetase domain containing 1
AW	ENSMUSG00000004771	0.0617104	0.0673887	0.552823	0.00730567	0.101584	0.0223094	0.41475	Rab11a	RAB11A, member RAS oncogene family
AW	ENSMUSG00000007805	0.253035	0.0881613	0.587513	0.00731272	0.101584	0.014632	0.388908	Twist2	twist basic helix-loop-helix transcription factor 2
AW	ENSMUSG00000020485	-0.00293795	0.960579	0.992446	0.00732266	0.101584	0.0322872	0.453461	Supt4a	suppressor of Ty 4A
AW	ENSMUSG00000026836	0.0977091	0.0303117	0.46385	0.00734504	0.101625	0.0198159	0.409137	Acvr1	activin A receptor, type 1
AW	ENSMUSG00000050931	0.212952	0.0265216	0.449735	0.00738379	0.101822	0.0270115	0.431738	Sgms2	sphingomyelin synthase 2
AW	ENSMUSG00000020099	0.336639	0.0350052	0.479376	0.0074496	0.102212	0.0175548	0.39986	Unc5b	unc-5 homolog B (C. elegans)
AW	ENSMUSG00000001802	0.307546	0.0119459	0.374001	0.00747134	0.102317	0.0181196	0.404149	Lrp3	low density lipoprotein receptor-related protein 3
AW	ENSMUSG00000026123	0.368269	0.0125893	0.375823	0.00764263	0.102935	0.0167656	0.395245	Plekhb2	pleckstrin homology domain containing, family B (evectins) member 2
AW	ENSMUSG00000060098	0.0635583	0.0987926	0.602493	0.00768116	0.103037	0.0248677	0.420234	Prmt7	protein arginine N-methyltransferase 7
AW	ENSMUSG00000005501	0.126939	0.0214698	0.429987	0.00768707	0.103037	0.0354603	0.459474	Usp40	ubiquitin specific peptidase 40
AW	ENSMUSG00000024924	0.411928	0.0106451	0.364259	0.00778106	0.103274	0.0156486	0.389542	Vldlr	very low density lipoprotein receptor
AW	ENSMUSG00000019920	0.144778	0.0202726	0.426739	0.00785293	0.103535	0.0233157	0.417729	Lims1	LIM and senescent cell antigen-like domains 1
AW	ENSMUSG00000032815	0.312242	0.0418381	0.502519	0.00790128	0.103677	0.0466626	0.486615	Fanca	Fanconi anemia, complementation group A
AW	ENSMUSG00000026421	0.187371	0.0156541	0.398945	0.00793947	0.103735	0.0182394	0.404149	Csrp1	cysteine and glycine-rich protein 1
AW	ENSMUSG00000021371	0.108486	0.189396	0.705343	0.00795733	0.103784	0.0213578	0.413779	Mcur1	mitochondrial calcium uniporter regulator 1
AW	ENSMUSG00000026972	0.164634	0.0205064	0.42811	0.00804399	0.103943	0.0263757	0.428411	Arrdc1	arrestin domain containing 1
AW	ENSMUSG00000002014	0.081614	0.084356	0.580233	0.00805213	0.103991	0.0434103	0.47726	Ssr4	signal sequence receptor, delta
AW	ENSMUSG00000042742	0.107621	0.0218442	0.430013	0.00815253	0.104481	0.0436194	0.478201	B630005N14Rik	RIKEN cDNA B630005N14 gene
AW	ENSMUSG00000034126	0.0912896	0.150333	0.664664	0.00832481	0.104916	0.0238748	0.41803	Pomt2	protein-O-mannosyltransferase 2
AW	ENSMUSG00000021411	0.238989	0.0100816	0.358257	0.00833325	0.104916	0.0404678	0.46805	Pxdc1	PX domain containing 1
AW	ENSMUSG00000004267	0.379382	0.0457109	0.514952	0.00833608	0.104916	0.0196352	0.409137	Eno2	enolase 2, gamma neuronal
AW	ENSMUSG00000029033	0.0807513	0.0198613	0.422998	0.00835299	0.105003	0.0321681	0.453461	Acap3	ArfGAP with coiled-coil, ankyrin repeat and PH domains 3
AW	ENSMUSG00000021692	0.0918824	0.0231558	0.437129	0.00836552	0.105031	0.0188678	0.407432	Dimt1	DIM1 dimethyladenosine transferase 1-like (S. cerevisiae)
AW	ENSMUSG00000041324	0.501023	0.0221693	0.431694	0.00839681	0.105089	0.0211242	0.413463	Inhba	inhibin beta-A
AW	ENSMUSG00000035443	0.130654	0.0475239	0.521214	0.00845342	0.10537	0.0379902	0.463234	Thyn1	thymocyte nuclear protein 1
AW	ENSMUSG00000021243	0.0813874	0.0110963	0.367606	0.00847757	0.105406	0.0426747	0.474641	Fcf1	FCF1 small subunit (SSU) processome component homolog (S. cerevisiae)
AW	ENSMUSG00000032855	0.0819938	0.1239	0.634565	0.00867921	0.105975	0.0469721	0.486615	Pkd1	polycystic kidney disease 1 homolog
AW	ENSMUSG00000021493	0.118731	0.0490177	0.524097	0.00870018	0.105975	0.022652	0.416366	Pdlim7	PDZ and LIM domain 7
AW	ENSMUSG00000020325	0.201063	0.0598751	0.542179	0.00878664	0.106138	0.0223389	0.41475	Fstl3	follistatin-like 3
AW	ENSMUSG00000003062	0.0825133	0.0195534	0.420686	0.00881344	0.106138	0.0494623	0.491964	Stard3nl	STARD3 N-terminal like
AW	ENSMUSG00000025650	0.526762	0.0185574	0.417031	0.00886596	0.106339	0.021138	0.413463	Col7a1	collagen, type VII, alpha 1
AW	ENSMUSG00000032298	0.161923	0.017724	0.410985	0.00895674	0.106828	0.0489423	0.491073	Neil1	nei endonuclease VIII-like 1 (E. coli)
AW	ENSMUSG00000058290	0.209636	0.0509441	0.526824	0.00904912	0.106951	0.0234413	0.417729	Espl1	extra spindle pole bodies 1 (S. cerevisiae)
AW	ENSMUSG00000031960	0.0778743	0.0555098	0.536581	0.0091914	0.107582	0.0273345	0.432877	Aars	alanyl-tRNA synthetase
AW	ENSMUSG00000025224	0.06326	0.0273726	0.454562	0.00925555	0.10787	0.0211401	0.413463	Gbf1	golgi-specific brefeldin A-resistance factor 1
AW	ENSMUSG00000021196	0.210839	0.0348398	0.478572	0.00942601	0.108884	0.0219653	0.414499	Pfkp	phosphofructokinase, platelet
AW	ENSMUSG00000026837	0.169011	0.0703769	0.556953	0.00949234	0.10906	0.0225545	0.416164	Col5a1	collagen, type V, alpha 1
AW	ENSMUSG00000020303	0.152822	0.219751	0.728175	0.00949896	0.109082	0.0229301	0.416908	Stc2	stanniocalcin 2
AW	ENSMUSG00000023345	0.0645452	0.474856	0.865313	0.00951503	0.10916	0.02187	0.414201	Poc1a	POC1 centriolar protein homolog A (Chlamydomonas)
AW	ENSMUSG00000001786	0.151332	0.0360153	0.483332	0.00951766	0.109163	0.0432869	0.47683	Fbxo7	F-box protein 7
AW	ENSMUSG00000030759	0.0662465	0.205135	0.717878	0.00952077	0.109163	0.0202522	0.410536	Far1	fatty acyl CoA reductase 1
AW	ENSMUSG00000041313	0.198185	0.0598908	0.542179	0.00953958	0.109206	0.0188435	0.407432	Slc7a1	solute carrier family 7 (cationic amino acid transporter, y+ system), member 1
AW	ENSMUSG00000003435	0.0781244	0.0300912	0.463791	0.0097153	0.109919	0.0192561	0.407587	Supt5	suppressor of Ty 5
AW	ENSMUSG00000028420	0.22256	0.0189493	0.417839	0.00983359	0.110453	0.0247462	0.419542	Tmem38b	transmembrane protein 38B
AW	ENSMUSG00000022678	0.180177	0.0528909	0.531456	0.00993377	0.110822	0.0207863	0.413326	Nde1	nuclear distribution gene E homolog 1 (A nidulans)
AW	ENSMUSG00000057177	-0.0788897	0.000790304	0.215408	2.14286e-06	0.0122897	3.30874e-05	0.182564	Gsk3a	glycogen synthase kinase 3 alpha
AW	ENSMUSG00000002059	-0.202592	4.35861e-06	0.0511538	2.81774e-06	0.0122897	4.213e-05	0.182564	Rab34	RAB34, member RAS oncogene family
AW	ENSMUSG00000041559	-0.833593	0.00149714	0.255972	1.07947e-05	0.0214423	0.000131132	0.231034	Fmod	fibromodulin
AW	ENSMUSG00000018858	-0.141221	4.97063e-05	0.12157	1.82355e-05	0.0249923	0.000386515	0.231034	Ict1	immature colon carcinoma transcript 1
AW	ENSMUSG00000028096	-0.170893	6.41382e-05	0.127827	2.76525e-05	0.0276201	0.00047176	0.231034	Gpr89	G protein-coupled receptor 89
AW	ENSMUSG00000018899	-0.265819	0.0036827	0.299108	3.05966e-05	0.0283573	0.00208831	0.302102	Irf1	interferon regulatory factor 1
AW	ENSMUSG00000021583	-0.218602	0.00323948	0.294675	3.59234e-05	0.0285835	0.000278092	0.231034	Erap1	endoplasmic reticulum aminopeptidase 1
AW	ENSMUSG00000047824	-0.137557	0.000108216	0.13423	4.06826e-05	0.0287501	0.000246573	0.231034	Pygo2	pygopus 2
AW	ENSMUSG00000021501	-0.100145	0.000312013	0.177749	4.65298e-05	0.029522	0.000730993	0.247943	Caml	calcium modulating ligand
AW	ENSMUSG00000039244	-0.103815	0.000631078	0.205262	6.16168e-05	0.0317868	0.000443119	0.231034	E130309D02Rik	RIKEN cDNA E130309D02 gene
AW	ENSMUSG00000051344	-0.186237	0.000769052	0.215408	6.7109e-05	0.0322944	0.000493179	0.231132	Plekhm3	pleckstrin homology domain containing, family M, member 3
AW	ENSMUSG00000010047	-0.170729	0.00195214	0.27182	8.22275e-05	0.0324455	0.00231469	0.303324	Hyal2	hyaluronoglucosaminidase 2
AW	ENSMUSG00000013858	-0.146222	0.000150094	0.148685	8.7759e-05	0.0324455	0.000931785	0.254318	Tmem259	transmembrane protein 259
AW	ENSMUSG00000001036	-0.227901	0.000983987	0.227375	0.000110321	0.0339017	0.00194572	0.302102	Epn2	epsin 2
AW	ENSMUSG00000001576	-0.221082	0.000396566	0.183361	0.000130262	0.0341287	0.00187304	0.297613	Ergic1	endoplasmic reticulum-golgi intermediate compartment (ERGIC) 1
AW	ENSMUSG00000021488	-0.108259	0.00233893	0.280104	0.000144785	0.0342316	0.00408469	0.322742	Nsd1	nuclear receptor-binding SET-domain protein 1
AW	ENSMUSG00000021987	-0.14578	0.000350985	0.180154	0.000167822	0.0358109	0.00163381	0.276893	Mtmr6	myotubularin related protein 6
AW	ENSMUSG00000035840	-0.194968	0.000442327	0.188773	0.000193933	0.0369805	0.00107178	0.257482	Lysmd3	LysM, putative peptidoglycan-binding, domain containing 3
AW	ENSMUSG00000020653	-0.177135	0.00037926	0.180154	0.000199453	0.0369805	0.00139171	0.272256	Klf11	Kruppel-like factor 11
AW	ENSMUSG00000017466	-0.187468	0.00302575	0.292544	0.000254402	0.0387757	0.00225173	0.303173	Timp2	tissue inhibitor of metalloproteinase 2
AW	ENSMUSG00000021417	-0.207909	0.00421823	0.311274	0.000275451	0.0393041	0.00302099	0.314657	Eci2	enoyl-Coenzyme A delta isomerase 2
AW	ENSMUSG00000005779	-0.0857153	0.00190592	0.27182	0.000290539	0.0399702	0.00752517	0.352572	Psmb4	proteasome (prosome, macropain) subunit, beta type 4
AW	ENSMUSG00000046822	-0.162859	0.00758572	0.338247	0.000302104	0.040401	0.0103533	0.361656	Slc39a3	solute carrier family 39 (zinc transporter), member 3
AW	ENSMUSG00000023030	-0.0822379	0.257478	0.753146	0.000304653	0.040401	0.00171652	0.284743	Slc11a2	solute carrier family 11 (proton-coupled divalent metal ion transporters), member 2
AW	ENSMUSG00000028698	-0.357063	0.00219054	0.27612	0.000337513	0.0419168	0.00207644	0.302102	Pik3r3	phosphatidylinositol 3 kinase, regulatory subunit, polypeptide 3 (p55)
AW	ENSMUSG00000053113	-0.194636	0.00080299	0.215408	0.000348714	0.0425985	0.00591593	0.339669	Socs3	suppressor of cytokine signaling 3
AW	ENSMUSG00000042790	-0.157859	0.00161823	0.261059	0.000357747	0.0429618	0.000909785	0.254225	Rnf214	ring finger protein 214
AW	ENSMUSG00000036188	-0.168899	0.00437215	0.311387	0.000359439	0.0429618	0.000893916	0.254225	Ankmy2	ankyrin repeat and MYND domain containing 2
AW	ENSMUSG00000032463	-0.214361	0.0209981	0.428775	0.000379921	0.0436404	0.0115123	0.366405	Faim	Fas apoptotic inhibitory molecule
AW	ENSMUSG00000030872	-0.251638	0.00248319	0.285196	0.000405627	0.0436404	0.00221466	0.303112	Gga2	golgi associated, gamma adaptin ear containing, ARF binding protein 2
AW	ENSMUSG00000042712	-0.290041	0.00136361	0.246336	0.000406063	0.0436404	0.00422637	0.326327	Wbp5	WW domain binding protein 5
AW	ENSMUSG00000075706	-0.262626	0.00193358	0.27182	0.000407689	0.0436404	0.00265485	0.311381	Gpx4	glutathione peroxidase 4
AW	ENSMUSG00000022621	-0.152287	0.000890672	0.223597	0.000413488	0.0437263	0.00273623	0.311751	Rabl2	RAB, member RAS oncogene family-like 2
AW	ENSMUSG00000034158	-0.284032	0.00083594	0.217608	0.000435774	0.0448627	0.0231745	0.417729	Lrrc58	leucine rich repeat containing 58
AW	ENSMUSG00000067071	-0.21653	0.00232491	0.279138	0.000445718	0.0449984	0.00646659	0.345056	Hes6	hairy and enhancer of split 6
AW	ENSMUSG00000030612	-0.167677	0.000723953	0.213538	0.000447169	0.045048	0.00369273	0.322742	Mrpl46	mitochondrial ribosomal protein L46
AW	ENSMUSG00000046897	-0.153402	0.00183998	0.27182	0.000453397	0.0452197	0.00271772	0.311751	Zfp740	zinc finger protein 740
AW	ENSMUSG00000003526	-0.292978	0.0403655	0.498493	0.000463374	0.0455934	0.00619716	0.345056	Prodh	proline dehydrogenase
AW	ENSMUSG00000022185	-0.0499118	0.0817011	0.575457	0.000465209	0.0455934	0.0013287	0.272256	Acin1	apoptotic chromatin condensation inducer 1
AW	ENSMUSG00000025949	-0.148393	0.00418558	0.310905	0.000473968	0.0460459	0.00371168	0.322742	Pikfyve	phosphoinositide kinase, FYVE finger containing
AW	ENSMUSG00000029627	-0.314993	0.019438	0.420403	0.000492187	0.046336	0.0350471	0.458626	Zkscan14	zinc finger with KRAB and SCAN domains 14
AW	ENSMUSG00000030421	-0.132508	0.00250618	0.285964	0.000518278	0.0471008	0.0231683	0.417729	Uri1	URI1, prefoldin-like chaperone
AW	ENSMUSG00000003346	-0.100672	0.000800014	0.215408	0.000529207	0.0476621	0.00397839	0.322742	Abhd17a	abhydrolase domain containing 17A
AW	ENSMUSG00000078970	-0.136839	0.00200211	0.272301	0.000549639	0.0481395	0.0161254	0.39009	Wdr92	WD repeat domain 92
AW	ENSMUSG00000024712	-0.156037	0.00383771	0.302792	0.00055481	0.0483861	0.00417369	0.324932	Rfk	riboflavin kinase
AW	ENSMUSG00000059486	-0.0944142	0.0457078	0.514952	0.000557978	0.0484182	0.00143905	0.272256	Kbtbd2	kelch repeat and BTB (POZ) domain containing 2
AW	ENSMUSG00000018481	-0.0772586	0.0666534	0.550888	0.000578527	0.048672	0.0113782	0.365355	Appbp2	amyloid beta precursor protein (cytoplasmic tail) binding protein 2
AW	ENSMUSG00000040167	-0.160686	0.00623698	0.329267	0.000616341	0.0499051	0.00239713	0.303324	Ikzf5	IKAROS family zinc finger 5
AW	ENSMUSG00000026072	-0.378152	0.030663	0.466136	0.000637839	0.0505685	0.0186087	0.405862	Il1r1	interleukin 1 receptor, type I
AW	ENSMUSG00000042079	-0.0704958	0.00131804	0.244567	0.000663368	0.0509714	0.00354214	0.322742	Hnrnpf	heterogeneous nuclear ribonucleoprotein F
AW	ENSMUSG00000048109	-0.112189	0.00922195	0.353839	0.000664141	0.0509714	0.00547477	0.335796	Rbm15	RNA binding motif protein 15
AW	ENSMUSG00000001156	-0.143804	0.0409123	0.499668	0.000680714	0.0509714	0.0100397	0.358687	Mxd1	MAX dimerization protein 1
AW	ENSMUSG00000022956	-0.089502	0.00176651	0.26821	0.000685087	0.0509714	0.00322317	0.316552	Atp5o	ATP synthase, H+ transporting, mitochondrial F1 complex, O subunit
AW	ENSMUSG00000020659	-0.104338	0.00138323	0.246336	0.000685139	0.0509714	0.0064227	0.345056	Cbll1	Casitas B-lineage lymphoma-like 1
AW	ENSMUSG00000047635	-0.203099	0.00177112	0.26821	0.000710592	0.0515334	0.00604495	0.341567	2810006K23Rik	RIKEN cDNA 2810006K23 gene
AW	ENSMUSG00000058655	-0.0947616	0.0911103	0.59145	0.000713324	0.0515334	0.0158544	0.389542	Eif4b	eukaryotic translation initiation factor 4B
AW	ENSMUSG00000028271	-0.0467871	0.0624252	0.544143	0.000719987	0.0516027	0.0283334	0.435601	Gtf2b	general transcription factor IIB
AW	ENSMUSG00000032249	-0.099681	0.00904198	0.351939	0.000730048	0.0518259	0.0098105	0.357379	Anp32a	acidic (leucine-rich) nuclear phosphoprotein 32 family, member A
AW	ENSMUSG00000030168	-0.0745037	0.146685	0.661131	0.00076137	0.0528735	0.00882076	0.356795	Adipor2	adiponectin receptor 2
AW	ENSMUSG00000048661	-0.0809475	0.00157776	0.259016	0.00076535	0.0528891	0.00214937	0.302102	Lemd3	LEM domain containing 3
AW	ENSMUSG00000094870	-0.1355	0.00285873	0.288351	0.000766613	0.0528891	0.00404755	0.322742	Zfp131	zinc finger protein 131
AW	ENSMUSG00000037493	-0.0988732	0.227389	0.732659	0.000772274	0.0529341	0.00290408	0.31317	Cib2	calcium and integrin binding family member 2
AW	ENSMUSG00000031776	-0.175109	0.0110497	0.367178	0.00079066	0.0530227	0.00492809	0.331599	Arl2bp	ADP-ribosylation factor-like 2 binding protein
AW	ENSMUSG00000039308	-0.115761	0.00245886	0.285196	0.00079122	0.0530227	0.00326913	0.317742	Ndst2	N-deacetylase/N-sulfotransferase (heparan glucosaminyl) 2
AW	ENSMUSG00000044452	-0.172178	0.0123426	0.375554	0.000793661	0.0530227	0.00659083	0.345581	Zfp507	zinc finger protein 507
AW	ENSMUSG00000025742	-0.190618	0.0596185	0.542072	0.000796754	0.0530227	0.00537802	0.3346	Prps2	phosphoribosyl pyrophosphate synthetase 2
AW	ENSMUSG00000020585	-0.142002	0.00204657	0.272301	0.000798444	0.0530227	0.00503907	0.331599	Laptm4a	lysosomal-associated protein transmembrane 4A
AW	ENSMUSG00000027822	-0.13297	0.00559868	0.323475	0.000849815	0.0541102	0.00599058	0.340572	Slc33a1	solute carrier family 33 (acetyl-CoA transporter), member 1
AW	ENSMUSG00000026482	-0.283329	0.00238487	0.282722	0.000867785	0.0542256	0.0116684	0.368126	Rgl1	ral guanine nucleotide dissociation stimulator,-like 1
AW	ENSMUSG00000042323	-0.0627003	0.0668037	0.551353	0.000867896	0.0542256	0.00214825	0.302102	Pbrm1	polybromo 1
AW	ENSMUSG00000064145	-0.0710352	0.0624881	0.544143	0.000873334	0.0542691	0.00218355	0.302356	Arih2	ariadne homolog 2 (Drosophila)
AW	ENSMUSG00000036890	-0.189101	0.0200889	0.425428	0.000898407	0.0548516	0.024845	0.420003	Gtdc1	glycosyltransferase-like domain containing 1
AW	ENSMUSG00000055538	-0.202508	0.00334729	0.295166	0.000909647	0.0550301	0.00529972	0.333059	Zcchc24	zinc finger, CCHC domain containing 24
AW	ENSMUSG00000029994	-0.185659	0.0075778	0.338247	0.00093559	0.0553341	0.00254275	0.308039	Anxa4	annexin A4
AW	ENSMUSG00000058835	-0.0334639	0.480425	0.866872	0.000946643	0.0555502	0.0120673	0.370843	Abi1	abl-interactor 1
AW	ENSMUSG00000040128	-0.18447	0.00385915	0.303973	0.000958098	0.0556899	0.00313144	0.314657	Pnrc1	proline-rich nuclear receptor coactivator 1
AW	ENSMUSG00000014599	-0.243924	0.125012	0.635304	0.000959455	0.0556899	0.0159038	0.389542	Csf1	colony stimulating factor 1 (macrophage)
AW	ENSMUSG00000069495	-0.0517569	0.0523026	0.530083	0.000963459	0.0556899	0.0230997	0.417729	Epc2	enhancer of polycomb homolog 2 (Drosophila)
AW	ENSMUSG00000049823	-0.160481	0.00657273	0.331311	0.00097572	0.0560165	0.0048194	0.331599	Zbtb12	zinc finger and BTB domain containing 12
AW	ENSMUSG00000023904	-0.304818	0.0907376	0.590946	0.000997039	0.0563928	0.0209957	0.413463	Hcfc1r1	host cell factor C1 regulator 1 (XPO1-dependent)
AW	ENSMUSG00000061118	-0.174502	0.00905696	0.351939	0.0010023	0.056554	0.0140189	0.381777	Dnajc30	DnaJ (Hsp40) homolog, subfamily C, member 30
AW	ENSMUSG00000073755	-0.2033	0.00656659	0.331311	0.00101182	0.0566779	0.0160553	0.389606	5730409E04Rik	RIKEN cDNA 5730409E04Rik gene
AW	ENSMUSG00000031568	-0.131703	0.00434724	0.311387	0.00102112	0.0567621	0.00620538	0.345056	Rwdd4a	RWD domain containing 4A
AW	ENSMUSG00000016319	-0.209119	0.00227551	0.276746	0.00102314	0.0567621	0.0172567	0.397961	Slc25a5	solute carrier family 25 (mitochondrial carrier, adenine nucleotide translocator), member 5
AW	ENSMUSG00000021540	-0.181891	0.00700548	0.335342	0.00105383	0.0568646	0.00765049	0.352572	Smad5	SMAD family member 5
AW	ENSMUSG00000039646	-0.175125	0.00500979	0.320172	0.00105863	0.0568847	0.0084083	0.35606	Vasn	vasorin
AW	ENSMUSG00000022982	-0.0983099	0.00599338	0.329028	0.00107287	0.0571679	0.00656224	0.345581	Sod1	superoxide dismutase 1, soluble
AW	ENSMUSG00000025369	-0.0824425	0.0788387	0.570523	0.00109276	0.0573181	0.00290648	0.31317	Smarcc2	SWI/SNF related, matrix associated, actin dependent regulator of chromatin, subfamily c, member 2
AW	ENSMUSG00000040865	-0.131315	0.0105504	0.362847	0.00112591	0.0576434	0.0080495	0.354488	Ino80d	INO80 complex subunit D
AW	ENSMUSG00000022828	-0.104563	0.0209691	0.428775	0.00114673	0.0583103	0.0232504	0.417729	Gtf2e1	general transcription factor II E, polypeptide 1 (alpha subunit)
AW	ENSMUSG00000030104	-0.178907	0.00663934	0.33226	0.00118175	0.0583843	0.00549838	0.335796	Edem1	ER degradation enhancer, mannosidase alpha-like 1
AW	ENSMUSG00000015189	-0.146549	0.00677676	0.332793	0.00119944	0.0585295	0.00371117	0.322742	Casd1	CAS1 domain containing 1
AW	ENSMUSG00000039841	-0.0974886	0.0460936	0.515697	0.00122254	0.0585295	0.0086477	0.35606	Zfp800	zinc finger protein 800
AW	ENSMUSG00000068882	-0.0845976	0.00607767	0.329267	0.00124133	0.0588218	0.00784788	0.35323	Ssb	Sjogren syndrome antigen B
AW	ENSMUSG00000069094	-0.126931	0.111394	0.617185	0.00125798	0.0589938	0.00290516	0.31317	Pde7a	phosphodiesterase 7A
AW	ENSMUSG00000029213	-0.188472	0.00858684	0.35167	0.00128502	0.0590073	0.00988097	0.357738	Commd8	COMM domain containing 8
AW	ENSMUSG00000059291	-0.0605404	0.12638	0.637155	0.00131283	0.0592138	0.0166107	0.39503	Rpl11	ribosomal protein L11
AW	ENSMUSG00000038893	-0.231343	0.00305576	0.292544	0.00133221	0.0597018	0.0123565	0.372321	Fam117a	family with sequence similarity 117, member A
AW	ENSMUSG00000036564	-0.475473	0.0249086	0.444155	0.00133665	0.0597018	0.028964	0.438193	Ndrg4	N-myc downstream regulated gene 4
AW	ENSMUSG00000016940	-0.192665	0.00468126	0.317289	0.00136142	0.0600933	0.00812581	0.355751	Kctd2	potassium channel tetramerisation domain containing 2
AW	ENSMUSG00000029131	-0.0720333	0.0553191	0.536339	0.00137287	0.0601482	0.00380341	0.322742	Dnajb6	DnaJ (Hsp40) homolog, subfamily B, member 6
AW	ENSMUSG00000019791	-0.407962	0.00219198	0.27612	0.00137478	0.0601482	0.0375442	0.46257	Hint3	histidine triad nucleotide binding protein 3
AW	ENSMUSG00000059811	-0.0998423	0.0151778	0.397758	0.00138436	0.0602864	0.00768157	0.352572	Atl2	atlastin GTPase 2
AW	ENSMUSG00000027170	-0.112121	0.00320306	0.292544	0.00139909	0.0603588	0.00731843	0.350865	Eif3m	eukaryotic translation initiation factor 3, subunit M
AW	ENSMUSG00000020180	-0.107152	0.006081	0.329267	0.00140115	0.0603588	0.00533443	0.3339	Snrpd3	small nuclear ribonucleoprotein D3
AW	ENSMUSG00000022964	-0.213253	0.00617113	0.329267	0.00140252	0.0603588	0.00355821	0.322742	Tmem50b	transmembrane protein 50B
AW	ENSMUSG00000021477	-0.310671	0.0118636	0.373628	0.00140271	0.0603588	0.0199665	0.409137	Ctsl	cathepsin L
AW	ENSMUSG00000042046	-0.11747	0.00506605	0.320172	0.00140287	0.0603588	0.00731692	0.350865	Dstyk	dual serine/threonine and tyrosine protein kinase
AW	ENSMUSG00000017548	-0.0629658	0.0291441	0.461157	0.00140536	0.0603588	0.00504267	0.331599	Suz12	suppressor of zeste 12 homolog (Drosophila)
AW	ENSMUSG00000066894	-0.292931	0.00425022	0.311274	0.00140892	0.0603588	0.0106884	0.363549	Vsig10	V-set and immunoglobulin domain containing 10
AW	ENSMUSG00000029231	-0.291141	0.0125187	0.375823	0.00141476	0.0603588	0.00479264	0.331599	Pdgfra	platelet derived growth factor receptor, alpha polypeptide
AW	ENSMUSG00000052837	-0.138334	0.00434403	0.311387	0.00141738	0.0603588	0.00333368	0.318607	Junb	jun B proto-oncogene
AW	ENSMUSG00000030630	-0.227919	0.021722	0.430013	0.00142432	0.0603588	0.00959427	0.357379	Fah	fumarylacetoacetate hydrolase
AW	ENSMUSG00000032112	-0.135015	0.00409321	0.310905	0.0014263	0.0603588	0.00645276	0.345056	Trappc4	trafficking protein particle complex 4
AW	ENSMUSG00000020946	-0.137338	0.00437353	0.311387	0.00142845	0.0603588	0.0227226	0.416589	Gosr2	golgi SNAP receptor complex member 2
AW	ENSMUSG00000023991	-0.170086	0.00215854	0.275581	0.00143774	0.060479	0.00491963	0.331599	Foxp4	forkhead box P4
AW	ENSMUSG00000026977	-0.0706319	0.187808	0.703899	0.0014495	0.0607019	0.00480248	0.331599	March7	membrane-associated ring finger (C3HC4) 7
AW	ENSMUSG00000020888	-0.0826165	0.00268731	0.286941	0.00149557	0.0612967	0.0170352	0.397394	Dvl2	dishevelled 2, dsh homolog (Drosophila)
AW	ENSMUSG00000024620	-0.171956	0.00271732	0.286941	0.00149585	0.0612967	0.013775	0.381514	Pdgfrb	platelet derived growth factor receptor, beta polypeptide
AW	ENSMUSG00000029535	-0.143469	0.00576331	0.325923	0.00151339	0.0614124	0.0241985	0.418322	Triap1	TP53 regulated inhibitor of apoptosis 1
AW	ENSMUSG00000060681	-0.0286525	0.57162	0.899794	0.00152638	0.061613	0.00639418	0.345056	Slc9a6	solute carrier family 9 (sodium/hydrogen exchanger), member 6
AW	ENSMUSG00000003531	-0.213	0.00985819	0.356925	0.00154795	0.0620944	0.0157546	0.389542	Dgcr6	DiGeorge syndrome critical region gene 6
AW	ENSMUSG00000098643	-0.0721727	0.0509598	0.526824	0.00155303	0.0621584	0.0201708	0.41016
AW	ENSMUSG00000027195	-0.118674	0.0320867	0.471503	0.00157029	0.0623665	0.0438886	0.479151	Hsd17b12	hydroxysteroid (17-beta) dehydrogenase 12
AW	ENSMUSG00000061353	-0.517475	0.00267836	0.286941	0.00166916	0.0632231	0.00709122	0.349315	Cxcl12	chemokine (C-X-C motif) ligand 12
AW	ENSMUSG00000036792	-0.0957724	0.0560485	0.537857	0.00169061	0.0635434	0.0109116	0.363797	Mbd5	methyl-CpG binding domain protein 5
AW	ENSMUSG00000027932	-0.374542	0.0169245	0.404859	0.00171475	0.063978	0.0467183	0.486615	Slc27a3	solute carrier family 27 (fatty acid transporter), member 3
AW	ENSMUSG00000006728	-0.175899	0.00936118	0.355301	0.00172428	0.063978	0.00880987	0.356795	Cdk4	cyclin-dependent kinase 4
AW	ENSMUSG00000022974	-0.158229	0.00315733	0.292544	0.00173071	0.063978	0.00700772	0.348758	Paxbp1	PAX3 and PAX7 binding protein 1
AW	ENSMUSG00000022664	-0.200187	0.00412785	0.310905	0.00175465	0.0639872	0.0111935	0.364222	Slc35a5	solute carrier family 35, member A5
AW	ENSMUSG00000010406	-0.121467	0.0184653	0.416457	0.0017667	0.0640097	0.0117197	0.368731	Mrpl52	mitochondrial ribosomal protein L52
AW	ENSMUSG00000058704	-0.139651	0.0061451	0.329267	0.00177331	0.0640097	0.0457808	0.485319	Memo1	mediator of cell motility 1
AW	ENSMUSG00000005698	-0.0521989	0.142502	0.656568	0.00178337	0.0641535	0.0238707	0.41803	Ctcf	CCCTC-binding factor
AW	ENSMUSG00000027994	-0.284031	0.0147668	0.393879	0.00178525	0.0641718	0.0274025	0.43365	Ccdc109b	coiled-coil domain containing 109B
AW	ENSMUSG00000020121	-0.190097	0.00326621	0.29487	0.00179709	0.0644004	0.00857444	0.35606	Srgap1	SLIT-ROBO Rho GTPase activating protein 1
AW	ENSMUSG00000043140	-0.199525	0.00427269	0.311387	0.00181023	0.0645309	0.0316668	0.451578	Tmem186	transmembrane protein 186
AW	ENSMUSG00000055172	-0.4321	0.00467862	0.317289	0.00185866	0.0650931	0.00419433	0.325459	C1ra	complement component 1, r subcomponent A
AW	ENSMUSG00000040648	-0.151834	0.00289342	0.288351	0.00186921	0.0650931	0.00476706	0.331599	Ppip5k2	diphosphoinositol pentakisphosphate kinase 2
AW	ENSMUSG00000022474	-0.195147	0.00436	0.311387	0.00188481	0.0652525	0.0306663	0.447786	Pmm1	phosphomannomutase 1
AW	ENSMUSG00000031333	-0.185213	0.00820217	0.347206	0.00189176	0.0653278	0.00939701	0.357379	Abcb7	ATP-binding cassette, sub-family B (MDR/TAP), member 7
AW	ENSMUSG00000026187	-0.122897	0.0145957	0.392735	0.00191578	0.0657252	0.00754704	0.352572	Xrcc5	X-ray repair complementing defective repair in Chinese hamster cells 5
AW	ENSMUSG00000033014	-0.0844301	0.0931931	0.594827	0.00191664	0.0657252	0.00486941	0.331599	Trim33	tripartite motif-containing 33
AW	ENSMUSG00000026811	-0.132553	0.0603031	0.542792	0.00192653	0.065823	0.0159974	0.389542	St6galnac6	ST6 (alpha-N-acetyl-neuraminyl-2,3-beta-galactosyl-1,3)-N-acetylgalactosaminide alpha-2,6-sialyltransferase 6
AW	ENSMUSG00000073468	-0.124856	0.00556198	0.323475	0.00193941	0.066167	0.00483725	0.331599	Sft2d1	SFT2 domain containing 1
AW	ENSMUSG00000066441	-0.0841374	0.0316616	0.469173	0.00194906	0.066217	0.00871223	0.356095	Rdh11	retinol dehydrogenase 11
AW	ENSMUSG00000037353	-0.0681677	0.131425	0.644954	0.00194934	0.066217	0.0254355	0.422304	Letmd1	LETM1 domain containing 1
AW	ENSMUSG00000038766	-0.162315	0.00254892	0.286941	0.00195435	0.0662913	0.0122542	0.370854	Gabpb2	GA repeat binding protein, beta 2
AW	ENSMUSG00000015697	-0.053485	0.217033	0.726346	0.0019585	0.0663362	0.0408986	0.46932	Setdb1	SET domain, bifurcated 1
AW	ENSMUSG00000003031	-0.127608	0.00481539	0.320172	0.00198997	0.066613	0.0270792	0.431738	Cdkn1b	cyclin-dependent kinase inhibitor 1B
AW	ENSMUSG00000027088	-0.202092	0.00869486	0.351939	0.00200732	0.0668967	0.0114302	0.366405	Phospho2	phosphatase, orphan 2
AW	ENSMUSG00000027531	-0.119986	0.00877924	0.351939	0.00202064	0.0668967	0.0152851	0.389542	Impa1	inositol (myo)-1(or 4)-monophosphatase 1
AW	ENSMUSG00000091277	-0.17146	0.0301261	0.463791	0.00202067	0.0668967	0.00630214	0.345056	Gm1818	predicted gene 1818
AW	ENSMUSG00000058558	-0.0607188	0.0455594	0.514601	0.00204994	0.0673516	0.0110121	0.363797	Rpl5	ribosomal protein L5
AW	ENSMUSG00000002332	-0.250827	0.0140534	0.387834	0.00206713	0.0674995	0.0435874	0.478087	Dhrs1	dehydrogenase/reductase (SDR family) member 1
AW	ENSMUSG00000039756	-0.0316267	0.635204	0.917641	0.00208682	0.0676561	0.0108684	0.363797	Dnttip2	deoxynucleotidyltransferase, terminal, interacting protein 2
AW	ENSMUSG00000029649	-0.11793	0.00997519	0.356925	0.00211293	0.0678033	0.0121255	0.370843	Pomp	proteasome maturation protein
AW	ENSMUSG00000038344	-0.0961942	0.0528687	0.531394	0.00211448	0.0678033	0.00834741	0.35606	Txlng	taxilin gamma
AW	ENSMUSG00000014426	-0.1913	0.0133846	0.384368	0.00212921	0.0680238	0.00591861	0.339669	Map3k4	mitogen-activated protein kinase kinase kinase 4
AW	ENSMUSG00000016257	-0.14357	0.00466141	0.317289	0.00213215	0.0680238	0.00762817	0.352572	Slmo2	slowmo homolog 2 (Drosophila)
AW	ENSMUSG00000058240	-0.116357	0.00443082	0.31279	0.00214272	0.0680309	0.00485289	0.331599	Cryzl1	crystallin, zeta (quinone reductase)-like 1
AW	ENSMUSG00000059183	-0.10377	0.0347266	0.478572	0.00216498	0.0680309	0.011548	0.366405	Mtfmt	mitochondrial methionyl-tRNA formyltransferase
AW	ENSMUSG00000094114	-0.148365	0.010435	0.362141	0.00218557	0.0680309	0.0239187	0.41803	Gm21967	predicted gene, 21967
AW	ENSMUSG00000045664	-0.304643	0.0160202	0.400677	0.00219254	0.0681647	0.0115166	0.366405	Cdc42ep2	CDC42 effector protein (Rho GTPase binding) 2
AW	ENSMUSG00000044147	-0.0756177	0.0253651	0.446036	0.00223704	0.0688189	0.0141993	0.384128	Arf6	ADP-ribosylation factor 6
AW	ENSMUSG00000023923	-0.0763262	0.181697	0.6967	0.00225174	0.0688775	0.0104407	0.36215	Tbc1d5	TBC1 domain family, member 5
AW	ENSMUSG00000034168	-0.131463	0.00975029	0.356925	0.00225724	0.0688775	0.0141389	0.38367	Irf2bpl	interferon regulatory factor 2 binding protein-like
AW	ENSMUSG00000056260	-0.147591	0.0334848	0.476401	0.00227337	0.0689183	0.0138558	0.381774	Lrif1	ligand dependent nuclear receptor interacting factor 1
AW	ENSMUSG00000057278	-0.141918	0.00513934	0.320173	0.0022755	0.0689183	0.0131203	0.3771	Snrpg	small nuclear ribonucleoprotein polypeptide G
AW	ENSMUSG00000048756	-0.152633	0.0148508	0.394526	0.00228678	0.069126	0.00498458	0.331599	Foxo3	forkhead box O3
AW	ENSMUSG00000011831	-0.0648959	0.431946	0.848049	0.00231092	0.0694534	0.0045472	0.331599	Evi5	ecotropic viral integration site 5
AW	ENSMUSG00000039704	-0.137671	0.0407554	0.498895	0.0023193	0.0696161	0.0119536	0.370623	Lmbrd2	LMBR1 domain containing 2
AW	ENSMUSG00000038451	-0.256455	0.00636792	0.329594	0.00232953	0.0697001	0.0319567	0.452962	Spsb2	splA/ryanodine receptor domain and SOCS box containing 2
AW	ENSMUSG00000070544	-0.0936363	0.0139544	0.387834	0.00233332	0.0697001	0.00852468	0.35606	Top1	topoisomerase (DNA) I
AW	ENSMUSG00000001761	-0.118682	0.0444435	0.511247	0.00235645	0.0700149	0.0408446	0.468929	Smo	smoothened, frizzled class receptor
AW	ENSMUSG00000078429	-0.12507	0.0092627	0.353839	0.0023656	0.0700649	0.0247652	0.419542	Ctdsp2	CTD (carboxy-terminal domain, RNA polymerase II, polypeptide A) small phosphatase 2
AW	ENSMUSG00000046138	-0.143116	0.00661592	0.332176	0.00236727	0.0700702	0.00749571	0.352572	9930021J03Rik	RIKEN cDNA 9930021J03 gene
AW	ENSMUSG00000029060	-0.109415	0.0112451	0.367606	0.00238156	0.070266	0.0128712	0.374888	Mib2	mindbomb homolog 2 (Drosophila)
AW	ENSMUSG00000028633	-0.116493	0.15583	0.67048	0.00239337	0.0703108	0.031544	0.450837	Ctps	cytidine 5'-triphosphate synthase
AW	ENSMUSG00000028759	-0.0745764	0.00557032	0.323475	0.00241224	0.0706442	0.00779572	0.352572	Hp1bp3	heterochromatin protein 1, binding protein 3
AW	ENSMUSG00000028962	-0.0762615	0.00580876	0.32602	0.00241786	0.0707647	0.0377306	0.46257	Slc4a2	solute carrier family 4 (anion exchanger), member 2
AW	ENSMUSG00000038633	-0.116524	0.0594204	0.542072	0.00245178	0.0709994	0.0146335	0.388908	Degs1	degenerative spermatocyte homolog 1 (Drosophila)
AW	ENSMUSG00000045100	-0.0921878	0.205972	0.718484	0.00247131	0.0709994	0.0496139	0.491964	Slc25a26	solute carrier family 25 (mitochondrial carrier, phosphate carrier), member 26
AW	ENSMUSG00000041482	-0.550687	0.00645815	0.331155	0.00247777	0.0709994	0.0375743	0.46257	Piezo2	piezo-type mechanosensitive ion channel component 2
AW	ENSMUSG00000032513	-0.105899	0.0436842	0.50862	0.00250933	0.0713543	0.0392032	0.465688	Gorasp1	golgi reassembly stacking protein 1
AW	ENSMUSG00000028322	-0.0824495	0.102646	0.60734	0.0025099	0.0713543	0.0468059	0.486615	Exosc3	exosome component 3
AW	ENSMUSG00000030706	-0.115964	0.00756264	0.338247	0.00251649	0.0713736	0.0102246	0.360899	Mrpl48	mitochondrial ribosomal protein L48
AW	ENSMUSG00000000085	-0.135457	0.0111403	0.367606	0.00252409	0.0713914	0.0156506	0.389542	Scmh1	sex comb on midleg homolog 1
AW	ENSMUSG00000029169	-0.0244336	0.300682	0.779484	0.00260025	0.0724014	0.0099486	0.358157	Dhx15	DEAH (Asp-Glu-Ala-His) box polypeptide 15
AW	ENSMUSG00000024271	-0.16073	0.0140919	0.387834	0.00262029	0.0725755	0.0129226	0.374958	Elp2	elongator acetyltransferase complex subunit 2
AW	ENSMUSG00000034403	-0.215839	0.00531602	0.322014	0.00262338	0.0725755	0.0384102	0.464851	Pja1	praja ring finger 1, E3 ubiquitin protein ligase
AW	ENSMUSG00000021027	-0.107647	0.00787002	0.342124	0.00263768	0.072756	0.0140885	0.382745	Ralgapa1	Ral GTPase activating protein, alpha subunit 1
AW	ENSMUSG00000038014	-0.027574	0.44549	0.854416	0.00269183	0.073079	0.0225703	0.416167	Fam120a	family with sequence similarity 120, member A
AW	ENSMUSG00000038844	-0.130848	0.0559199	0.537282	0.00274524	0.0735803	0.0494032	0.491964	Kif16b	kinesin family member 16B
AW	ENSMUSG00000020074	-0.0631911	0.0119292	0.374001	0.00275056	0.0735803	0.014088	0.382745	Ccar1	cell division cycle and apoptosis regulator 1
AW	ENSMUSG00000039914	-0.10153	0.00774155	0.340878	0.00282928	0.0739425	0.0189419	0.407587	Coq10a	coenzyme Q10 homolog A (yeast)
AW	ENSMUSG00000039656	-0.116333	0.165027	0.678449	0.00283213	0.0739425	0.0167687	0.395245	Rxrb	retinoid X receptor beta
AW	ENSMUSG00000079343	-0.483033	0.0028919	0.288351	0.00284012	0.0740307	0.00671643	0.347632	C1s2	complement component 1, s subcomponent 2
AW	ENSMUSG00000064138	-0.150103	0.0185945	0.417255	0.00286067	0.0741964	0.00725259	0.350865	Fam172a	family with sequence similarity 172, member A
AW	ENSMUSG00000042167	-0.0911488	0.0154309	0.398461	0.00287483	0.0742757	0.012319	0.371669	Papd4	PAP associated domain containing 4
AW	ENSMUSG00000030232	-0.117942	0.0825792	0.577402	0.00293111	0.0751507	0.00782493	0.352972	Aebp2	AE binding protein 2
AW	ENSMUSG00000071533	-0.0875735	0.0565758	0.538728	0.00294453	0.0753641	0.0488504	0.490913	Pcnp	PEST proteolytic signal containing nuclear protein
AW	ENSMUSG00000036403	-0.114369	0.0169956	0.405622	0.00297812	0.075578	0.0171499	0.397961	Cep135	centrosomal protein 135
AW	ENSMUSG00000009555	-0.0783098	0.0078014	0.34132	0.00300653	0.0758474	0.0215568	0.413779	Cdk9	cyclin-dependent kinase 9 (CDC2-related kinase)
AW	ENSMUSG00000020777	-0.22229	0.00991826	0.356925	0.0030484	0.0762425	0.00851585	0.35606	Acox1	acyl-Coenzyme A oxidase 1, palmitoyl
AW	ENSMUSG00000007880	-0.0192364	0.577993	0.902196	0.00305509	0.076297	0.0326477	0.454718	Arid1a	AT rich interactive domain 1A (SWI-like)
AW	ENSMUSG00000044017	-0.737775	0.00696414	0.335342	0.00309748	0.0769392	0.0323154	0.453461	Adgrd1	adhesion G protein-coupled receptor D1
AW	ENSMUSG00000026641	-0.114184	0.00836388	0.348501	0.00309992	0.0769392	0.00955996	0.357379	Usf1	upstream transcription factor 1
AW	ENSMUSG00000093930	-0.207654	0.0694788	0.556244	0.00312622	0.0770167	0.0105799	0.363549	Hmgcs1	3-hydroxy-3-methylglutaryl-Coenzyme A synthase 1
AW	ENSMUSG00000017428	-0.0419561	0.0828168	0.577718	0.00315797	0.0772946	0.0276126	0.433971	Psmd11	proteasome (prosome, macropain) 26S subunit, non-ATPase, 11
AW	ENSMUSG00000022108	-0.186528	0.00984103	0.356925	0.00317733	0.077465	0.00976037	0.357379	Itm2b	integral membrane protein 2B
AW	ENSMUSG00000004897	-0.120016	0.0202625	0.426739	0.00319121	0.0775372	0.0156612	0.389542	Hdgf	hepatoma-derived growth factor
AW	ENSMUSG00000063273	-0.0535525	0.198221	0.713227	0.00320746	0.0775567	0.0221375	0.41455	Naa15	N(alpha)-acetyltransferase 15, NatA auxiliary subunit
AW	ENSMUSG00000027002	-0.0371788	0.366767	0.815442	0.00323706	0.0778903	0.0127435	0.373902	Nckap1	NCK-associated protein 1
AW	ENSMUSG00000042055	-0.160866	0.00884688	0.351939	0.00329722	0.0786925	0.00944423	0.357379	Wdr11	WD repeat domain 11
AW	ENSMUSG00000026457	-0.0682587	0.0425892	0.504756	0.00332127	0.0788256	0.019949	0.409137	Adipor1	adiponectin receptor 1
AW	ENSMUSG00000030259	-0.0303164	0.763409	0.952264	0.00333319	0.0788408	0.00745484	0.351655	Rassf8	Ras association (RalGDS/AF-6) domain family (N-terminal) member 8
AW	ENSMUSG00000032599	-0.107683	0.013275	0.383678	0.00336199	0.0792205	0.00924844	0.357379	Ip6k2	inositol hexaphosphate kinase 2
AW	ENSMUSG00000020170	-0.160465	0.00464688	0.317289	0.00340236	0.0794251	0.0122432	0.370843	Frs2	fibroblast growth factor receptor substrate 2
AW	ENSMUSG00000018401	-0.0214264	0.771119	0.954188	0.00341179	0.0795266	0.0122067	0.370843	Mtmr4	myotubularin related protein 4
AW	ENSMUSG00000033400	-0.180074	0.0206229	0.42811	0.00341847	0.0795384	0.0207112	0.413326	Agl	amylo-1,6-glucosidase, 4-alpha-glucanotransferase
AW	ENSMUSG00000022550	-0.162331	0.0146962	0.39289	0.0035011	0.0802762	0.0333938	0.456863	Adck5	aarF domain containing kinase 5
AW	ENSMUSG00000042229	-0.0939413	0.00803023	0.345607	0.00356875	0.0810842	0.0170041	0.397343	Rabif	RAB interacting factor
AW	ENSMUSG00000040268	-0.160158	0.0220312	0.4313	0.00357147	0.0810842	0.0152289	0.389542	Plekha1	pleckstrin homology domain containing, family A (phosphoinositide binding specific) member 1
AW	ENSMUSG00000018209	-0.0956536	0.0178947	0.412611	0.0035781	0.0810842	0.0309966	0.449671	Stk4	serine/threonine kinase 4
AW	ENSMUSG00000042626	-0.124395	0.0103117	0.361563	0.00358965	0.0812127	0.0191754	0.407587	Shc1	src homology 2 domain-containing transforming protein C1
AW	ENSMUSG00000031353	-0.0887276	0.125082	0.635304	0.00360533	0.0813712	0.0178467	0.402021	Rbbp7	retinoblastoma binding protein 7
AW	ENSMUSG00000037993	-0.0801684	0.0344734	0.478552	0.00364343	0.0814393	0.0103018	0.361628	Dhx38	DEAH (Asp-Glu-Ala-His) box polypeptide 38
AW	ENSMUSG00000025234	-0.0460809	0.153939	0.669072	0.00366388	0.0815211	0.0213657	0.413779	Arih1	ariadne ubiquitin-conjugating enzyme E2 binding protein homolog 1 (Drosophila)
AW	ENSMUSG00000018999	-0.134909	0.0236572	0.438817	0.00367459	0.0816557	0.0233465	0.417729	Slc35b4	solute carrier family 35, member B4
AW	ENSMUSG00000040455	-0.111041	0.181767	0.696736	0.00368969	0.0816888	0.0119432	0.370623	Usp45	ubiquitin specific petidase 45
AW	ENSMUSG00000040435	-0.211166	0.0265407	0.449735	0.00370847	0.081793	0.0167174	0.395245	Ppp1r15a	protein phosphatase 1, regulatory (inhibitor) subunit 15A
AW	ENSMUSG00000021120	-0.170872	0.0159677	0.400677	0.00372372	0.081851	0.0253043	0.421693	Pigh	phosphatidylinositol glycan anchor biosynthesis, class H
AW	ENSMUSG00000031631	-0.132491	0.0105607	0.362914	0.00377237	0.0819752	0.0161669	0.390536	Cfap97	cilia and flagella associated protein 97
AW	ENSMUSG00000025041	-0.0981145	0.0120463	0.374759	0.00378945	0.0819752	0.0135611	0.380504	Nt5c2	5'-nucleotidase, cytosolic II
AW	ENSMUSG00000026812	-0.169477	0.00522381	0.320173	0.00379143	0.0819752	0.0215908	0.413779	Tsc1	tuberous sclerosis 1
AW	ENSMUSG00000008763	-0.198589	0.0156744	0.398945	0.00379924	0.0819752	0.0401262	0.467139	Man1a2	mannosidase, alpha, class 1A, member 2
AW	ENSMUSG00000035637	-0.148832	0.00512352	0.320173	0.00384588	0.0822416	0.015255	0.389542	Grhpr	glyoxylate reductase/hydroxypyruvate reductase
AW	ENSMUSG00000022246	-0.271531	0.00758452	0.338247	0.00388601	0.0825806	0.0207782	0.413326	Rai14	retinoic acid induced 14
AW	ENSMUSG00000041570	-0.0913119	0.253632	0.7503	0.0039122	0.0825806	0.00925364	0.357379	Camsap2	calmodulin regulated spectrin-associated protein family, member 2
AW	ENSMUSG00000026627	-0.145444	0.026805	0.451245	0.0039324	0.0825816	0.0227496	0.41667	Tmem206	transmembrane protein 206
AW	ENSMUSG00000029475	-0.0570987	0.0273507	0.454562	0.00393674	0.0825816	0.0247605	0.419542	Kdm2b	lysine (K)-specific demethylase 2B
AW	ENSMUSG00000020362	-0.16046	0.0731615	0.561846	0.0039369	0.0825816	0.00746817	0.351655	Cnot6	CCR4-NOT transcription complex, subunit 6
AW	ENSMUSG00000008429	-0.217781	0.00520114	0.320173	0.00408526	0.0836647	0.0320491	0.453449	Herpud2	HERPUD family member 2
AW	ENSMUSG00000056268	-0.288994	0.0261439	0.448756	0.0041238	0.0839149	0.0354863	0.459474	Dennd1b	DENN/MADD domain containing 1B
AW	ENSMUSG00000001768	-0.180816	0.0112578	0.367606	0.0041526	0.0839646	0.0144893	0.387357	Rin2	Ras and Rab interactor 2
AW	ENSMUSG00000031728	-0.105757	0.121428	0.63059	0.00415933	0.0839646	0.0254592	0.422304	Zfp821	zinc finger protein 821
AW	ENSMUSG00000024892	-0.289783	0.0083423	0.348501	0.00416662	0.0839729	0.0193332	0.407587	Pcx	pyruvate carboxylase
AW	ENSMUSG00000020128	-0.10285	0.0214386	0.429987	0.00418006	0.0839729	0.0202876	0.41057	Vps54	vacuolar protein sorting 54 (yeast)
AW	ENSMUSG00000000127	-0.156783	0.0098987	0.356925	0.00419355	0.0840225	0.0210571	0.413463	Fer	fer (fms/fps related) protein kinase
AW	ENSMUSG00000039630	-0.0175342	0.506208	0.876702	0.00419433	0.0840225	0.00949478	0.357379	Hnrnpu	heterogeneous nuclear ribonucleoprotein U
AW	ENSMUSG00000058569	-0.0633626	0.0187948	0.417759	0.00423075	0.0842384	0.0370222	0.46257	Tmed9	transmembrane emp24 protein transport domain containing 9
AW	ENSMUSG00000038058	-0.159259	0.0933961	0.594918	0.00425355	0.0844325	0.0143799	0.38608	Nod1	nucleotide-binding oligomerization domain containing 1
AW	ENSMUSG00000022043	-0.269051	0.0250108	0.44441	0.00436052	0.0850809	0.0395938	0.466229	Trim35	tripartite motif-containing 35
AW	ENSMUSG00000019831	-0.224001	0.10663	0.611137	0.00442098	0.0857871	0.0106125	0.363549	Wasf1	WAS protein family, member 1
AW	ENSMUSG00000032902	-0.253476	0.0207685	0.428756	0.00447332	0.0862778	0.0102453	0.360937	Slc16a1	solute carrier family 16 (monocarboxylic acid transporters), member 1
AW	ENSMUSG00000017299	-0.0992055	0.016638	0.402807	0.00448666	0.0862902	0.0426315	0.474641	Dnttip1	deoxynucleotidyltransferase, terminal, interacting protein 1
AW	ENSMUSG00000015656	-0.0200076	0.680462	0.929829	0.00452158	0.0865684	0.0135157	0.380504	Hspa8	heat shock protein 8
AW	ENSMUSG00000030629	-0.0343815	0.439426	0.851688	0.00453693	0.0866875	0.0127672	0.374362	Zfand6	zinc finger, AN1-type domain 6
AW	ENSMUSG00000021067	-0.151472	0.0195481	0.420686	0.0045389	0.0866875	0.0263477	0.428411	Sav1	salvador homolog 1 (Drosophila)
AW	ENSMUSG00000064317	-0.0723146	0.0226277	0.435173	0.00455543	0.0867234	0.0223064	0.41475	Gm10146	predicted gene 10146
AW	ENSMUSG00000022769	-0.0794362	0.00989883	0.356925	0.00456478	0.086794	0.0465747	0.486615	Sdf2l1	stromal cell-derived factor 2-like 1
AW	ENSMUSG00000030101	-0.138881	0.0201747	0.426238	0.00457219	0.086794	0.0216138	0.413779	Sumf1	sulfatase modifying factor 1
AW	ENSMUSG00000038418	-0.178556	0.0233827	0.43825	0.0046124	0.0869245	0.0106052	0.363549	Egr1	early growth response 1
AW	ENSMUSG00000022983	-0.0712079	0.00433458	0.311387	0.00464345	0.0870809	0.0125513	0.372856	Scaf4	SR-related CTD-associated factor 4
AW	ENSMUSG00000032624	-0.16942	0.0293532	0.46245	0.00467441	0.0873916	0.0188516	0.407432	Eml4	echinoderm microtubule associated protein like 4
AW	ENSMUSG00000039210	-0.140817	0.00649641	0.331155	0.00471878	0.0876973	0.0178325	0.401895	Gpatch2	G patch domain containing 2
AW	ENSMUSG00000024896	-0.16686	0.0195487	0.420686	0.00481886	0.0884146	0.0250377	0.420685	Minpp1	multiple inositol polyphosphate histidine phosphatase 1
AW	ENSMUSG00000028483	-0.0919282	0.0387895	0.492819	0.00482571	0.0884933	0.0317032	0.451583	Snapc3	small nuclear RNA activating complex, polypeptide 3
AW	ENSMUSG00000073563	-0.14138	0.00845974	0.348853	0.00483584	0.0885121	0.0375225	0.46257	Csnk1g3	casein kinase 1, gamma 3
AW	ENSMUSG00000022811	-0.0955795	0.0110517	0.367178	0.00483616	0.0885121	0.0222366	0.41475	Zfp148	zinc finger protein 148
AW	ENSMUSG00000049488	-0.0849355	0.0498254	0.525281	0.00485027	0.088518	0.00989767	0.357971	Tmem67	transmembrane protein 67
AW	ENSMUSG00000019897	-0.0804564	0.0770119	0.568559	0.00487354	0.0885195	0.0201139	0.41016	Ccdc59	coiled-coil domain containing 59
AW	ENSMUSG00000035227	-0.0653545	0.149886	0.663937	0.00492688	0.0888553	0.0441883	0.480635	Spcs2	signal peptidase complex subunit 2 homolog (S. cerevisiae)
AW	ENSMUSG00000020802	-0.0811622	0.0222185	0.431694	0.00493484	0.0888631	0.0366973	0.46257	Ube2o	ubiquitin-conjugating enzyme E2O
AW	ENSMUSG00000071661	-0.164707	0.0350252	0.479376	0.0050384	0.0895261	0.0389115	0.465688	Zbtb3	zinc finger and BTB domain containing 3
AW	ENSMUSG00000059495	-0.12578	0.0377347	0.490623	0.00506515	0.0897846	0.0115304	0.366405	Arhgef12	Rho guanine nucleotide exchange factor (GEF) 12
AW	ENSMUSG00000022110	-0.0479508	0.207254	0.720095	0.00507424	0.0898228	0.0110917	0.363906	Sucla2	succinate-Coenzyme A ligase, ADP-forming, beta subunit
AW	ENSMUSG00000000938	-0.240718	0.142244	0.656308	0.00516071	0.0901616	0.0316946	0.451583	Hoxa10	homeobox A10
AW	ENSMUSG00000051864	-0.101226	0.0136063	0.385478	0.0051775	0.0902095	0.0268629	0.431139	Tbc1d22a	TBC1 domain family, member 22a
AW	ENSMUSG00000034714	-0.304879	0.0188878	0.417759	0.00517828	0.0902095	0.0405026	0.468094	Ttyh2	tweety homolog 2 (Drosophila)
AW	ENSMUSG00000027351	-0.130135	0.0569417	0.539489	0.00520036	0.0902696	0.0209439	0.413463	Spred1	sprouty protein with EVH-1 domain 1, related sequence
AW	ENSMUSG00000027804	-0.142435	0.0120263	0.374636	0.00520208	0.0902696	0.0216696	0.413779	Ppid	peptidylprolyl isomerase D (cyclophilin D)
AW	ENSMUSG00000024338	-0.476335	0.0152511	0.397758	0.00525026	0.0903959	0.0247906	0.419542	Psmb8	proteasome (prosome, macropain) subunit, beta type 8 (large multifunctional peptidase 7)
AW	ENSMUSG00000028788	-0.0957303	0.031734	0.469361	0.00525449	0.0903959	0.0306093	0.447428	Ptp4a2	protein tyrosine phosphatase 4a2
AW	ENSMUSG00000023827	-0.0743187	0.453739	0.857753	0.00537258	0.091363	0.0175798	0.39998	Agpat4	1-acylglycerol-3-phosphate O-acyltransferase 4 (lysophosphatidic acid acyltransferase, delta)
AW	ENSMUSG00000013833	-0.114014	0.0108079	0.36581	0.00540687	0.0916669	0.0180084	0.403281	Med16	mediator complex subunit 16
AW	ENSMUSG00000027184	-0.0258723	0.47196	0.864691	0.00542928	0.0917864	0.0183113	0.404149	Caprin1	cell cycle associated protein 1
AW	ENSMUSG00000032870	-0.0959813	0.0247098	0.442855	0.00542956	0.0917864	0.0400512	0.467075	Smap2	small ArfGAP 2
AW	ENSMUSG00000022685	-0.107156	0.0246996	0.442855	0.00544813	0.0919356	0.0118773	0.369505	Parn	poly(A)-specific ribonuclease (deadenylation nuclease)
AW	ENSMUSG00000013155	-0.238252	0.010747	0.364942	0.00545127	0.0919356	0.0115242	0.366405	Enkd1	enkurin domain containing 1
AW	ENSMUSG00000032575	-0.109061	0.0337227	0.477255	0.00545633	0.0919408	0.0476294	0.487646	Manf	mesencephalic astrocyte-derived neurotrophic factor
AW	ENSMUSG00000054766	-0.0682753	0.115801	0.623712	0.00548324	0.0921059	0.015706	0.389542	Set	SET nuclear oncogene
AW	ENSMUSG00000046785	-0.150023	0.115989	0.623794	0.00549266	0.0921059	0.0104077	0.361656	Epm2aip1	EPM2A (laforin) interacting protein 1
AW	ENSMUSG00000003070	-0.229942	0.0770093	0.568559	0.00552791	0.0921059	0.0314659	0.450545	Efna2	ephrin A2
AW	ENSMUSG00000052957	-0.336412	0.0245034	0.442744	0.0055571	0.0922809	0.0304995	0.446777	Gas1	growth arrest specific 1
AW	ENSMUSG00000003464	-0.0434407	0.483917	0.86804	0.00561434	0.0928373	0.0146589	0.388908	Pex19	peroxisomal biogenesis factor 19
AW	ENSMUSG00000032531	-0.146818	0.0125831	0.375823	0.00568378	0.0929467	0.0120019	0.370843	Amotl2	angiomotin-like 2
AW	ENSMUSG00000025862	-0.02781	0.524047	0.88459	0.0057755	0.093423	0.0241951	0.418322	Stag2	stromal antigen 2
AW	ENSMUSG00000036810	-0.114946	0.0155977	0.398945	0.00579488	0.0935813	0.0338193	0.457281	Cnep1r1	CTD nuclear envelope phosphatase 1 regulatory subunit 1
AW	ENSMUSG00000038127	-0.173975	0.018875	0.417759	0.00595505	0.0945416	0.0147536	0.388908	Ccdc50	coiled-coil domain containing 50
AW	ENSMUSG00000021420	-0.0945555	0.0206581	0.428165	0.0060372	0.0951062	0.0389986	0.465688	Fars2	phenylalanine-tRNA synthetase 2 (mitochondrial)
AW	ENSMUSG00000024588	-0.109903	0.0525451	0.530708	0.00612812	0.0955116	0.0399498	0.466992	Fech	ferrochelatase
AW	ENSMUSG00000060036	-0.0817331	0.0122154	0.375164	0.00619388	0.0958062	0.0323017	0.453461	Rpl3	ribosomal protein L3
AW	ENSMUSG00000034724	-0.0718028	0.0178639	0.412579	0.00632275	0.096804	0.015647	0.389542	Cnot6l	CCR4-NOT transcription complex, subunit 6-like
AW	ENSMUSG00000002043	-0.254945	0.0198221	0.422954	0.0063365	0.0968047	0.0319073	0.452534	Trappc6a	trafficking protein particle complex 6A
AW	ENSMUSG00000002221	-0.0917526	0.00483515	0.320172	0.00636983	0.0971063	0.0208523	0.413369	Paxip1	PAX interacting (with transcription-activation domain) protein 1
AW	ENSMUSG00000042010	-0.313665	0.0375857	0.489843	0.00637367	0.0971063	0.0377212	0.46257	Acacb	acetyl-Coenzyme A carboxylase beta
AW	ENSMUSG00000020018	-0.133251	0.0200876	0.425428	0.006389	0.0971475	0.0247629	0.419542	Snrpf	small nuclear ribonucleoprotein polypeptide F
AW	ENSMUSG00000063904	-0.0770809	0.0157586	0.398945	0.00642888	0.0971475	0.0217533	0.413779	Dpp3	dipeptidylpeptidase 3
AW	ENSMUSG00000063200	-0.0525598	0.0565983	0.538728	0.00653163	0.097964	0.0166682	0.395245	Nol7	nucleolar protein 7
AW	ENSMUSG00000038481	-0.148924	0.055446	0.536572	0.00661826	0.098321	0.0153857	0.389542	Cdk19	cyclin-dependent kinase 19
AW	ENSMUSG00000040339	-0.326394	0.0171875	0.406989	0.00674978	0.0988669	0.0332601	0.456142	Fam102b	family with sequence similarity 102, member B
AW	ENSMUSG00000028820	-0.0391555	0.160417	0.674436	0.00675406	0.0988987	0.0439942	0.479301	Sfpq	splicing factor proline/glutamine rich (polypyrimidine tract binding protein associated)
AW	ENSMUSG00000029569	-0.103942	0.0548543	0.534704	0.00676462	0.0989915	0.0354271	0.459301	Tmem168	transmembrane protein 168
AW	ENSMUSG00000035673	-0.125118	0.0195885	0.421247	0.00681365	0.0991948	0.0184736	0.405862	Sbno2	strawberry notch homolog 2 (Drosophila)
AW	ENSMUSG00000067038	-0.0874456	0.0219404	0.430779	0.00686998	0.0994484	0.0367057	0.46257	Rps12-ps3	ribosomal protein S12, pseudogene 3
AW	ENSMUSG00000045594	-0.100617	0.230971	0.735801	0.00689358	0.0995551	0.0311276	0.449808	Glb1	galactosidase, beta 1
AW	ENSMUSG00000031708	-0.0959307	0.0375613	0.489843	0.00695775	0.0997653	0.037338	0.46257	Tecr	trans-2,3-enoyl-CoA reductase
AW	ENSMUSG00000033106	-0.0817709	0.0773286	0.568796	0.00698534	0.0999471	0.0420094	0.472779	Slc7a6os	solute carrier family 7, member 6 opposite strand
AW	ENSMUSG00000031774	-0.0517361	0.029972	0.463791	0.00708407	0.100441	0.0295104	0.441763	Fam192a	family with sequence similarity 192, member A
AW	ENSMUSG00000027900	-0.114101	0.0145842	0.392735	0.00710279	0.100517	0.0373512	0.46257	Dram2	DNA-damage regulated autophagy modulator 2
AW	ENSMUSG00000024393	-0.0429611	0.190902	0.707038	0.00716036	0.100667	0.0448727	0.482666	Prrc2a	proline-rich coiled-coil 2A
AW	ENSMUSG00000028969	-0.0850423	0.0687634	0.556244	0.00724359	0.10122	0.017344	0.397961	Cdk5	cyclin-dependent kinase 5
AW	ENSMUSG00000017485	-0.111293	0.0158358	0.399685	0.00732592	0.101584	0.0216785	0.413779	Top2b	topoisomerase (DNA) II beta
AW	ENSMUSG00000025873	-0.0837249	0.0417224	0.502519	0.00732815	0.101584	0.0254006	0.422304	Faf2	Fas associated factor family member 2
AW	ENSMUSG00000025571	-0.0962481	0.131797	0.645209	0.00733386	0.101584	0.0221743	0.41455	Tnrc6c	trinucleotide repeat containing 6C
AW	ENSMUSG00000008575	-0.483704	0.0213507	0.429987	0.00745415	0.102212	0.0152127	0.389542	Nfib	nuclear factor I/B
AW	ENSMUSG00000038668	-0.272675	0.0225359	0.434297	0.00748602	0.102368	0.0460195	0.486245	Lpar1	lysophosphatidic acid receptor 1
AW	ENSMUSG00000020821	-0.132315	0.0210283	0.428818	0.00760054	0.102754	0.0371236	0.46257	Kif1c	kinesin family member 1C
AW	ENSMUSG00000018666	-0.0420164	0.130887	0.643852	0.00765731	0.103035	0.0232562	0.417729	Cbx1	chromobox 1
AW	ENSMUSG00000022265	-0.277514	0.0307785	0.466138	0.00771591	0.103037	0.0266838	0.429753	Ank	progressive ankylosis
AW	ENSMUSG00000024487	-0.0564716	0.0126603	0.375869	0.00774285	0.103037	0.0417426	0.472421	Yipf5	Yip1 domain family, member 5
AW	ENSMUSG00000047213	-0.07042	0.103873	0.609179	0.00774807	0.10307	0.018631	0.405862	Ythdf3	YTH domain family 3
AW	ENSMUSG00000020738	-0.0559764	0.0432846	0.506985	0.00788772	0.103677	0.0357854	0.460726	Sumo2	small ubiquitin-like modifier 2
AW	ENSMUSG00000025373	-0.182613	0.0137462	0.386092	0.00789297	0.103677	0.0403153	0.468003	Rnf41	ring finger protein 41
AW	ENSMUSG00000029723	-0.0978016	0.0341398	0.477806	0.00789682	0.103677	0.0359782	0.460799	Tsc22d4	TSC22 domain family, member 4
AW	ENSMUSG00000017929	-0.189015	0.0117495	0.371935	0.00790195	0.103677	0.0391191	0.465688	B4galt5	UDP-Gal:betaGlcNAc beta 1,4-galactosyltransferase, polypeptide 5
AW	ENSMUSG00000023348	-0.0665475	0.0454082	0.514461	0.00794613	0.103769	0.043869	0.479151	Trip6	thyroid hormone receptor interactor 6
AW	ENSMUSG00000090451	-0.074577	0.0376526	0.489912	0.00799953	0.103847	0.0324511	0.45467	Gm6133	predicted gene 6133
AW	ENSMUSG00000034160	-0.0670031	0.181054	0.696204	0.00800999	0.103847	0.0223432	0.41475	Ogt	O-linked N-acetylglucosamine (GlcNAc) transferase (UDP-N-acetylglucosamine:polypeptide-N-acetylglucosaminyl transferase)
AW	ENSMUSG00000069089	-0.0924121	0.0795477	0.571528	0.00803415	0.103928	0.0186052	0.405862	Cdk7	cyclin-dependent kinase 7
AW	ENSMUSG00000026319	-0.0803328	0.0520134	0.528797	0.00803842	0.103928	0.0439264	0.479229	2310035C23Rik	RIKEN cDNA 2310035C23 gene
AW	ENSMUSG00000044786	-0.171167	0.0740252	0.563959	0.00811648	0.10442	0.0190042	0.407587	Zfp36	zinc finger protein 36
AW	ENSMUSG00000035158	-0.254264	0.0155679	0.398945	0.00829994	0.104899	0.0371922	0.46257	Mitf	microphthalmia-associated transcription factor
AW	ENSMUSG00000024943	-0.0635845	0.0109007	0.366309	0.008334	0.104916	0.0203308	0.41057	Smc5	structural maintenance of chromosomes 5
AW	ENSMUSG00000026930	-0.149323	0.0312924	0.46799	0.00842893	0.105266	0.0373492	0.46257	Gpsm1	G-protein signalling modulator 1 (AGS3-like, C. elegans)
AW	ENSMUSG00000025016	-0.036265	0.402036	0.834836	0.00845519	0.10537	0.0194243	0.408181	Tm9sf3	transmembrane 9 superfamily member 3
AW	ENSMUSG00000028617	-0.103244	0.0275525	0.454935	0.00847049	0.105406	0.0321595	0.453461	Lrrc42	leucine rich repeat containing 42
AW	ENSMUSG00000042104	-0.170143	0.0350716	0.479452	0.00854248	0.1057	0.0424454	0.474542	Uggt2	UDP-glucose glycoprotein glucosyltransferase 2
AW	ENSMUSG00000019817	-0.617823	0.0160837	0.401214	0.00857034	0.105785	0.0459324	0.486091	Plagl1	pleiomorphic adenoma gene-like 1
AW	ENSMUSG00000058407	-0.0904252	0.0172959	0.407357	0.00865984	0.105975	0.0481497	0.489229	Txndc9	thioredoxin domain containing 9
AW	ENSMUSG00000047205	-0.164454	0.0599511	0.542264	0.00866163	0.105975	0.0289339	0.438021	Dusp18	dual specificity phosphatase 18
AW	ENSMUSG00000010205	-0.0920408	0.0385475	0.492145	0.00870434	0.105975	0.0308507	0.449082	Raver1	ribonucleoprotein, PTB-binding 1
AW	ENSMUSG00000040565	-0.0403917	0.307117	0.783352	0.00871357	0.105975	0.0176194	0.39998	Btaf1	BTAF1 RNA polymerase II, B-TFIID transcription factor-associated, (Mot1 homolog, S. cerevisiae)
AW	ENSMUSG00000053175	-0.229163	0.0171605	0.406969	0.00873817	0.106053	0.0256505	0.423481	Bcl3	B cell leukemia/lymphoma 3
AW	ENSMUSG00000073176	-0.125494	0.0723803	0.559784	0.00878157	0.106138	0.0257993	0.424905	Zfp449	zinc finger protein 449
AW	ENSMUSG00000043019	-0.15702	0.0172344	0.407	0.00878268	0.106138	0.016016	0.389542	Edem3	ER degradation enhancer, mannosidase alpha-like 3
AW	ENSMUSG00000059474	-0.038923	0.341547	0.801495	0.00881415	0.106138	0.017783	0.401895	Mbtd1	mbt domain containing 1
AW	ENSMUSG00000024940	-0.155535	0.025863	0.448756	0.00883066	0.106187	0.0451268	0.482805	Ltbp3	latent transforming growth factor beta binding protein 3
AW	ENSMUSG00000027881	-0.100865	0.0398258	0.497536	0.00884728	0.106252	0.017073	0.397673	Prpf38b	PRP38 pre-mRNA processing factor 38 (yeast) domain containing B
AW	ENSMUSG00000037410	-0.181398	0.0464016	0.517105	0.00890308	0.106594	0.0271216	0.431738	Tbc1d2b	TBC1 domain family, member 2B
AW	ENSMUSG00000022634	-0.123547	0.0200196	0.424874	0.00897957	0.106828	0.0156865	0.389542	Yaf2	YY1 associated factor 2
AW	ENSMUSG00000062270	-0.0343678	0.169031	0.682951	0.00898734	0.106828	0.030231	0.445071	Morf4l1	mortality factor 4 like 1
AW	ENSMUSG00000096210	-0.145143	0.0301444	0.463791	0.00904571	0.106951	0.0276796	0.43412	H1f0	H1 histone family, member 0
AW	ENSMUSG00000073791	-0.134278	0.0574134	0.540644	0.00907254	0.107013	0.0202018	0.41016	Efcab7	EF-hand calcium binding domain 7
AW	ENSMUSG00000027947	-0.230476	0.0188872	0.417759	0.00909141	0.107128	0.0434425	0.477416	Il6ra	interleukin 6 receptor, alpha
AW	ENSMUSG00000035798	-0.0709645	0.147318	0.661966	0.00911495	0.107324	0.0221648	0.41455	Zdhhc17	zinc finger, DHHC domain containing 17
AW	ENSMUSG00000059263	-0.0286396	0.493273	0.872422	0.00917401	0.107507	0.044579	0.481626	Usp47	ubiquitin specific peptidase 47
AW	ENSMUSG00000031358	-0.124632	0.0859261	0.583256	0.00924575	0.10781	0.0210484	0.413463	Msl3	male-specific lethal 3 homolog (Drosophila)
AW	ENSMUSG00000026575	-0.100779	0.048114	0.521739	0.00929141	0.108142	0.0375752	0.46257	Nme7	NME/NM23 family member 7
AW	ENSMUSG00000025428	-0.0616108	0.0554197	0.536572	0.00931171	0.108287	0.0201208	0.41016	Atp5a1	ATP synthase, H+ transporting, mitochondrial F1 complex, alpha subunit 1
AW	ENSMUSG00000032392	-0.116196	0.143621	0.657937	0.00931555	0.108287	0.0244003	0.41882	Parp16	poly (ADP-ribose) polymerase family, member 16
AW	ENSMUSG00000021242	-0.145825	0.105697	0.609871	0.00932115	0.108287	0.0206972	0.413326	Npc2	Niemann-Pick type C2
AW	ENSMUSG00000073643	-0.170664	0.0334432	0.476401	0.00947007	0.10906	0.0264218	0.4286	Wdfy1	WD repeat and FYVE domain containing 1
AW	ENSMUSG00000037822	-0.177522	0.0175118	0.40916	0.00947598	0.10906	0.0408782	0.4692	Smim14	small integral membrane protein 14
AW	ENSMUSG00000003226	-0.121585	0.011199	0.367606	0.00947991	0.10906	0.0321477	0.453461	Ranbp2	RAN binding protein 2
AW	ENSMUSG00000055917	-0.114347	0.0329388	0.474692	0.00953816	0.109206	0.0473241	0.486953	Zfp277	zinc finger protein 277
AW	ENSMUSG00000058571	-0.440135	0.0278084	0.455918	0.00955649	0.109227	0.0370932	0.46257	Gpc6	glypican 6
AW	ENSMUSG00000020198	-0.0598668	0.0363909	0.485295	0.00957081	0.109258	0.0442781	0.481054	Ap3d1	adaptor-related protein complex 3, delta 1 subunit
AW	ENSMUSG00000041417	-0.352724	0.00172268	0.267452	0.00957816	0.10926	0.0374347	0.46257	Pik3r1	phosphatidylinositol 3-kinase, regulatory subunit, polypeptide 1 (p85 alpha)
AW	ENSMUSG00000031174	-0.115187	0.0692806	0.556244	0.00960666	0.109434	0.0273401	0.432877	Rpgr	retinitis pigmentosa GTPase regulator
AW	ENSMUSG00000062762	-0.0562958	0.0368991	0.487544	0.00961354	0.109434	0.0496247	0.491964	Ei24	etoposide induced 2.4 mRNA
AW	ENSMUSG00000031666	-0.119372	0.0221943	0.431694	0.00968956	0.109847	0.0191892	0.407587	Rbl2	retinoblastoma-like 2
AW	ENSMUSG00000030431	-0.20514	0.120066	0.629585	0.00977646	0.110193	0.0221676	0.41455	Tmem238	transmembrane protein 238
AW	ENSMUSG00000023965	-0.0995532	0.0254066	0.446036	0.00978412	0.110253	0.0275134	0.433691	Fbxl17	F-box and leucine-rich repeat protein 17
AW	ENSMUSG00000046027	-0.147769	0.108239	0.6134	0.00980744	0.110357	0.0362323	0.461121	Stard5	StAR-related lipid transfer (START) domain containing 5
AW	ENSMUSG00000064363	-0.95099	0.0252869	0.446036	0.00985599	0.110585	0.0463963	0.486615	mt-Nd4	mitochondrially encoded NADH dehydrogenase 4
AW	ENSMUSG00000069833	-0.115112	0.0190919	0.419179	0.00993853	0.110849	0.0215099	0.413779	Ahnak	AHNAK nucleoprotein (desmoyokin)
AW	ENSMUSG00000042719	-0.0727524	0.0245304	0.442744	0.00998155	0.110986	0.0223783	0.414852	Naa25	N(alpha)-acetyltransferase 25, NatB auxiliary subunit

## Sheet: B. ML
Trait	Gene ID	coef.all	p value.all	q value.all	p value.robust	q value.robust	p value.max	q value.max	Symbol	Description
ML	ENSMUSG00000031827	1.8688	1.00049e-05	0.067097	1.09182e-06	0.0085426	8.79785e-06	0.0826031	Cotl1	coactosin-like 1 (Dictyostelium)
ML	ENSMUSG00000025384	1.09528	2.44713e-05	0.0984592	2.87969e-06	0.0122897	0.000146017	0.231034	Faap100	Fanconi anemia core complex associated protein 100
ML	ENSMUSG00000031709	1.08845	1.30788e-05	0.0723378	6.82109e-06	0.0177898	0.000113619	0.231034	Tbc1d9	TBC1 domain family, member 9
ML	ENSMUSG00000073609	0.598218	0.000982626	0.227375	1.86331e-05	0.0249923	0.000392731	0.231034	D2hgdh	D-2-hydroxyglutarate dehydrogenase
ML	ENSMUSG00000033991	0.463251	0.000104671	0.13423	1.95284e-05	0.0253491	0.000591995	0.238146	Ttc37	tetratricopeptide repeat domain 37
ML	ENSMUSG00000002963	0.440305	0.000101597	0.13423	2.05918e-05	0.025439	0.000166288	0.231034	Pnkp	polynucleotide kinase 3'- phosphatase
ML	ENSMUSG00000039474	0.769022	0.001905	0.27182	2.20641e-05	0.025895	0.00139872	0.272256	Wfs1	Wolfram syndrome 1 homolog (human)
ML	ENSMUSG00000061207	0.552906	0.000292465	0.177749	2.39297e-05	0.0267471	0.000649555	0.238146	Stk19	serine/threonine kinase 19
ML	ENSMUSG00000054520	0.852912	0.000422661	0.188773	3.29647e-05	0.0283573	0.000123852	0.231034	Sh3bp2	SH3-domain binding protein 2
ML	ENSMUSG00000057156	0.273752	0.412418	0.839154	3.41763e-05	0.0283573	0.00026184	0.231034	Homez	homeodomain leucine zipper-encoding gene
ML	ENSMUSG00000024925	0.849375	0.000490632	0.194259	6.80627e-05	0.0322944	0.000240768	0.231034	Rnaseh2c	ribonuclease H2, subunit C
ML	ENSMUSG00000033276	0.628907	0.00415716	0.310905	7.63369e-05	0.0324455	0.000664335	0.238146	Stk36	serine/threonine kinase 36
ML	ENSMUSG00000075266	1.04581	0.00013152	0.146935	7.76536e-05	0.0324455	0.000446998	0.231034	Cenpw	centromere protein W
ML	ENSMUSG00000002210	0.436342	0.000143103	0.148685	8.01914e-05	0.0324455	0.00239668	0.303324	Smg9	smg-9 homolog, nonsense mediated mRNA decay factor (C. elegans)
ML	ENSMUSG00000038260	0.964683	7.42004e-05	0.133975	8.97176e-05	0.0324455	0.00131116	0.272256	Trpm4	transient receptor potential cation channel, subfamily M, member 4
ML	ENSMUSG00000012519	1.07723	0.0672012	0.552401	9.50567e-05	0.0324457	0.000664546	0.238146	Mlkl	mixed lineage kinase domain-like
ML	ENSMUSG00000039738	0.897392	0.000170546	0.153967	0.000103727	0.0339017	0.00361893	0.322742	Slx4	SLX4 structure-specific endonuclease subunit homolog (S. cerevisiae)
ML	ENSMUSG00000049047	0.501541	0.00870918	0.351939	0.000104607	0.0339017	0.00477111	0.331599	Armcx3	armadillo repeat containing, X-linked 3
ML	ENSMUSG00000041126	0.705289	0.000273831	0.177749	0.000106906	0.0339017	0.00127796	0.271466	H2afv	H2A histone family, member V
ML	ENSMUSG00000030380	0.709919	0.00265747	0.286941	0.000108669	0.0339017	0.000749983	0.247943	Mzf1	myeloid zinc finger 1
ML	ENSMUSG00000037824	0.34585	0.0377298	0.490623	0.000117096	0.0339017	0.00297266	0.314647	Tspan14	tetraspanin 14
ML	ENSMUSG00000035504	1.38474	0.00174451	0.267452	0.000127648	0.0341287	0.00143191	0.272256	Reep6	receptor accessory protein 6
ML	ENSMUSG00000001143	0.579604	0.000216105	0.169084	0.000128322	0.0341287	0.00236509	0.303324	Lman2l	lectin, mannose-binding 2-like
ML	ENSMUSG00000019578	0.269354	0.0119582	0.374001	0.000132862	0.0341287	0.00351605	0.322742	Ubxn6	UBX domain protein 6
ML	ENSMUSG00000031090	0.854186	0.000605592	0.205262	0.00013464	0.0341287	0.000627486	0.238146	Nadsyn1	NAD synthetase 1
ML	ENSMUSG00000032115	0.520749	0.000299361	0.177749	0.000136675	0.0341287	0.000906629	0.254225	Hyou1	hypoxia up-regulated 1
ML	ENSMUSG00000031060	0.215351	0.0188548	0.417759	0.000143151	0.0342316	0.00118934	0.259189	Rbm10	RNA binding motif protein 10
ML	ENSMUSG00000036202	0.421533	0.0174984	0.40916	0.000143228	0.0342316	0.00114368	0.257482	Rif1	Rap1 interacting factor 1 homolog (yeast)
ML	ENSMUSG00000020415	1.1887	0.0011005	0.232885	0.000152951	0.0348557	0.00110857	0.257482	Pttg1	pituitary tumor-transforming gene 1
ML	ENSMUSG00000021594	0.9938	0.0265727	0.45002	0.00017347	0.0361768	0.00282619	0.31317	Srd5a1	steroid 5 alpha-reductase 1
ML	ENSMUSG00000038895	0.48096	0.000146779	0.148685	0.000179113	0.0365585	0.0054124	0.334714	Zfp653	zinc finger protein 653
ML	ENSMUSG00000025871	0.491344	0.0344873	0.478552	0.000184112	0.0368413	0.00418498	0.325272	4833439L19Rik	RIKEN cDNA 4833439L19 gene
ML	ENSMUSG00000091243	0.987111	0.00276566	0.286946	0.000190164	0.0369805	0.00253946	0.308039	Vgll3	vestigial like 3 (Drosophila)
ML	ENSMUSG00000047264	0.772935	0.00104759	0.232885	0.000196332	0.0369805	0.00381311	0.322742	Zfp358	zinc finger protein 358
ML	ENSMUSG00000054939	1.04296	0.0103156	0.361563	0.000196371	0.0369805	0.000862371	0.254225	Zfp174	zinc finger protein 174
ML	ENSMUSG00000024219	0.477059	0.000632047	0.205262	0.000197583	0.0369805	0.00134332	0.272256	Anks1	ankyrin repeat and SAM domain containing 1
ML	ENSMUSG00000034274	0.518936	0.000327409	0.180154	0.000200898	0.0369805	0.00355986	0.322742	Thoc5	THO complex 5
ML	ENSMUSG00000024736	0.510223	0.000538571	0.195994	0.000201762	0.0369805	0.00213762	0.302102	Tmem132a	transmembrane protein 132A
ML	ENSMUSG00000056201	0.273384	0.000439997	0.188773	0.000206388	0.0369805	0.00109626	0.257482	Cfl1	cofilin 1, non-muscle
ML	ENSMUSG00000030055	0.406835	0.0167555	0.402943	0.000211109	0.0370322	0.0139292	0.381777	Rab43	RAB43, member RAS oncogene family
ML	ENSMUSG00000027510	1.088	0.000294902	0.177749	0.000212987	0.0370322	0.000695957	0.240795	Rbm38	RNA binding motif protein 38
ML	ENSMUSG00000031134	0.293611	0.0157584	0.398945	0.000217701	0.0370949	0.00588634	0.339387	Rbmx	RNA binding motif protein, X chromosome
ML	ENSMUSG00000034586	2.598	0.00141017	0.248873	0.000218089	0.0370949	0.00686343	0.348758	Hid1	HID1 domain containing
ML	ENSMUSG00000036908	0.690392	0.0011873	0.237099	0.000222635	0.037461	0.0115801	0.366468	Unc93b1	unc-93 homolog B1 (C. elegans)
ML	ENSMUSG00000040428	1.06067	0.00891091	0.351939	0.000232759	0.0382654	0.00848423	0.35606	Plekha4	pleckstrin homology domain containing, family A (phosphoinositide binding specific) member 4
ML	ENSMUSG00000039735	1.17481	0.00093734	0.2262	0.000236817	0.0382654	0.00636576	0.345056	Fnbp1l	formin binding protein 1-like
ML	ENSMUSG00000020069	0.171758	0.381982	0.823293	0.000244197	0.0382654	0.0020171	0.302102	Hnrnph3	heterogeneous nuclear ribonucleoprotein H3
ML	ENSMUSG00000030983	0.582276	0.00325015	0.294675	0.000244615	0.0382654	0.0147429	0.388908	Bccip	BRCA2 and CDKN1A interacting protein
ML	ENSMUSG00000034259	0.303638	0.0118849	0.373701	0.000246736	0.0382654	0.00161149	0.276893	Exosc4	exosome component 4
ML	ENSMUSG00000028910	0.52471	0.000625239	0.205262	0.00025022	0.0383875	0.00314599	0.314657	Mecr	mitochondrial trans-2-enoyl-CoA reductase
ML	ENSMUSG00000050390	0.787466	0.00900675	0.351939	0.000257426	0.0389834	0.0103146	0.361628	C77080	expressed sequence C77080
ML	ENSMUSG00000028843	0.523799	0.00396943	0.3075	0.000263192	0.03919	0.00114603	0.257482	Sh3bgrl3	SH3 domain binding glutamic acid-rich protein-like 3
ML	ENSMUSG00000015095	0.365744	0.0118704	0.373628	0.000284182	0.0398411	0.00650792	0.345214	Fbxw5	F-box and WD-40 domain protein 5
ML	ENSMUSG00000039116	2.15715	0.000696859	0.211058	0.000285814	0.0399331	0.00151539	0.275044	Adgrg6	adhesion G protein-coupled receptor G6
ML	ENSMUSG00000020733	0.941221	0.00279336	0.286946	0.000292415	0.0399702	0.00693851	0.348758	Slc9a3r1	solute carrier family 9 (sodium/hydrogen exchanger), member 3 regulator 1
ML	ENSMUSG00000025403	0.570396	0.00295092	0.291031	0.000316359	0.0411482	0.00209337	0.302102	Shmt2	serine hydroxymethyltransferase 2 (mitochondrial)
ML	ENSMUSG00000059791	1.31844	0.000442275	0.188773	0.00031849	0.0411772	0.00099598	0.257482	Nrm	nurim (nuclear envelope membrane protein)
ML	ENSMUSG00000023456	0.536066	0.00551707	0.323475	0.000328568	0.0415758	0.00184073	0.295118	Tpi1	triosephosphate isomerase 1
ML	ENSMUSG00000015341	0.389467	0.00115494	0.234712	0.000349573	0.0425985	0.002385	0.303324	Golga7	golgi autoantigen, golgin subfamily a, 7
ML	ENSMUSG00000025855	1.89006	0.00107198	0.232885	0.000350974	0.0425985	0.00115221	0.257571	Prkar1b	protein kinase, cAMP dependent regulatory, type I beta
ML	ENSMUSG00000045795	0.815838	0.000747974	0.214108	0.000358773	0.0429618	0.00543343	0.334714	Whamm	WAS protein homolog associated with actin, golgi membranes and microtubules
ML	ENSMUSG00000034032	0.349933	0.00566783	0.323851	0.000362578	0.0429618	0.0101352	0.359318	Rpap1	RNA polymerase II associated protein 1
ML	ENSMUSG00000011832	0.302502	0.00567568	0.323851	0.000368832	0.0434547	0.00307861	0.314657	Evi5l	ecotropic viral integration site 5 like
ML	ENSMUSG00000026335	0.454678	0.113875	0.620961	0.000385313	0.0436404	0.00997805	0.358454	Pam	peptidylglycine alpha-amidating monooxygenase
ML	ENSMUSG00000078427	0.285657	0.00137766	0.246336	0.000387185	0.0436404	0.00188671	0.297613	Sarnp	SAP domain containing ribonucleoprotein
ML	ENSMUSG00000028622	0.302554	0.000565221	0.201696	0.000391411	0.0436404	0.00180207	0.291159	Mrpl37	mitochondrial ribosomal protein L37
ML	ENSMUSG00000028763	0.50864	0.00099613	0.227946	0.00040716	0.0436404	0.00528834	0.333059	Hspg2	perlecan (heparan sulfate proteoglycan 2)
ML	ENSMUSG00000024997	0.298132	0.00336767	0.295166	0.000408035	0.0436404	0.00841912	0.35606	Prdx3	peroxiredoxin 3
ML	ENSMUSG00000001248	0.423065	0.00440067	0.312068	0.000414241	0.0437263	0.00265746	0.311381	Gramd1a	GRAM domain containing 1A
ML	ENSMUSG00000024127	0.735141	0.00483105	0.320172	0.000419962	0.044007	0.00472601	0.331599	Prepl	prolyl endopeptidase-like
ML	ENSMUSG00000042744	0.358907	0.0453306	0.514423	0.000423717	0.0442707	0.00225249	0.303173	Gm15800	predicted gene 15800
ML	ENSMUSG00000062012	0.598579	0.00105738	0.232885	0.000445541	0.0449984	0.00311913	0.314657	Zfp13	zinc finger protein 13
ML	ENSMUSG00000026471	1.15583	0.0154482	0.398689	0.000488089	0.046336	0.0112972	0.364982	Mr1	major histocompatibility complex, class I-related
ML	ENSMUSG00000032175	0.539543	0.00509384	0.320172	0.000495386	0.046336	0.00705763	0.348758	Tyk2	tyrosine kinase 2
ML	ENSMUSG00000032020	1.52821	0.00645671	0.331155	0.000496024	0.046336	0.0089316	0.357379	Ubash3b	ubiquitin associated and SH3 domain containing, B
ML	ENSMUSG00000000384	0.328114	0.00108721	0.232885	0.000507537	0.0469633	0.0125094	0.372856	Tbrg4	transforming growth factor beta regulated gene 4
ML	ENSMUSG00000022951	0.739599	0.0208332	0.428756	0.000529974	0.0476621	0.00168994	0.284743	Rcan1	regulator of calcineurin 1
ML	ENSMUSG00000025161	2.2403	0.00142116	0.248942	0.000531	0.0476631	0.00548289	0.335796	Slc16a3	solute carrier family 16 (monocarboxylic acid transporters), member 3
ML	ENSMUSG00000039967	0.361881	0.00814793	0.346248	0.000532453	0.0477023	0.00888879	0.357141	Zfp292	zinc finger protein 292
ML	ENSMUSG00000037103	0.527955	0.00211117	0.273782	0.000557927	0.0484182	0.0113044	0.364982	Dcaf15	DDB1 and CUL4 associated factor 15
ML	ENSMUSG00000032667	0.677442	0.00332123	0.295166	0.00056124	0.0484406	0.00288725	0.31317	Pon2	paraoxonase 2
ML	ENSMUSG00000053293	0.296845	0.00830624	0.348469	0.000569725	0.0484406	0.0155639	0.389542	Pom121	nuclear pore membrane protein 121
ML	ENSMUSG00000059060	0.502657	0.164371	0.678191	0.0005699	0.0484406	0.00171124	0.284743	Rad51b	RAD51 homolog B
ML	ENSMUSG00000022641	0.517655	0.00310991	0.292544	0.000575308	0.0484881	0.00268743	0.311381	Bbx	bobby sox homolog (Drosophila)
ML	ENSMUSG00000028458	0.357728	0.00816124	0.346355	0.000606746	0.0495773	0.0228041	0.41667	Tesk1	testis specific protein kinase 1
ML	ENSMUSG00000049502	1.33527	0.00132916	0.245658	0.000607242	0.0495773	0.00254207	0.308039	Dtx3l	deltex 3-like (Drosophila)
ML	ENSMUSG00000028889	0.316849	0.0424834	0.504756	0.000619127	0.0499397	0.00848373	0.35606	Yrdc	yrdC domain containing (E.coli)
ML	ENSMUSG00000032565	1.64976	0.00121967	0.237099	0.000622631	0.0499648	0.00827044	0.356022	Nudt16	nudix (nucleoside diphosphate linked moiety X)-type motif 16
ML	ENSMUSG00000027496	0.695344	0.0563821	0.538662	0.000631392	0.0503064	0.00665125	0.346936	Aurka	aurora kinase A
ML	ENSMUSG00000039774	0.730784	0.0545602	0.533499	0.000649599	0.0509714	0.00355143	0.322742	Galnt12	UDP-N-acetyl-alpha-D-galactosamine:polypeptide N-acetylgalactosaminyltransferase 12
ML	ENSMUSG00000023345	0.758326	0.00152736	0.256078	0.000665195	0.0509714	0.00304148	0.314657	Poc1a	POC1 centriolar protein homolog A (Chlamydomonas)
ML	ENSMUSG00000028655	1.22738	0.002249	0.276641	0.000675124	0.0509714	0.00334429	0.318607	Mfsd2a	major facilitator superfamily domain containing 2A
ML	ENSMUSG00000032038	0.79619	0.00194978	0.27182	0.000688005	0.0509714	0.00844407	0.35606	St3gal4	ST3 beta-galactoside alpha-2,3-sialyltransferase 4
ML	ENSMUSG00000036983	0.711975	0.0022694	0.276746	0.000706923	0.0515319	0.00215683	0.302246	Tfb1m	transcription factor B1, mitochondrial
ML	ENSMUSG00000041319	0.423794	0.00167915	0.264523	0.00071334	0.0515334	0.00223294	0.303173	Thoc6	THO complex 6 homolog (Drosophila)
ML	ENSMUSG00000000568	0.291828	0.0106612	0.364259	0.000719068	0.0516027	0.00577875	0.339387	Hnrnpd	heterogeneous nuclear ribonucleoprotein D
ML	ENSMUSG00000028454	0.797381	0.000689484	0.211058	0.000725413	0.0518259	0.00288755	0.31317	Pigo	phosphatidylinositol glycan anchor biosynthesis, class O
ML	ENSMUSG00000029022	0.871597	0.00266268	0.286941	0.000727267	0.0518259	0.0113584	0.365219	Miip	migration and invasion inhibitory protein
ML	ENSMUSG00000028456	1.05078	0.00194005	0.27182	0.000728666	0.0518259	0.0228523	0.41667	Unc13b	unc-13 homolog B (C. elegans)
ML	ENSMUSG00000029547	0.234571	0.0535823	0.53169	0.00073414	0.0518259	0.00568502	0.337827	Ints1	integrator complex subunit 1
ML	ENSMUSG00000039577	0.788785	0.00980564	0.356925	0.000747312	0.0525188	0.0120725	0.370843	Nphp4	nephronophthisis 4 (juvenile) homolog (human)
ML	ENSMUSG00000030888	0.520611	0.00263373	0.286941	0.000761004	0.0528735	0.0044617	0.330719	Rrp8	ribosomal RNA processing 8, methyltransferase, homolog (yeast)
ML	ENSMUSG00000031913	0.254198	0.00154374	0.256669	0.000767227	0.0528891	0.0159958	0.389542	Vps4a	vacuolar protein sorting 4a (yeast)
ML	ENSMUSG00000026455	0.214029	0.262668	0.755251	0.000772391	0.0529341	0.00376924	0.322742	Klhl12	kelch-like 12
ML	ENSMUSG00000027575	0.394269	0.0021939	0.27612	0.000792093	0.0530227	0.00447344	0.330719	Arfgap1	ADP-ribosylation factor GTPase activating protein 1
ML	ENSMUSG00000026547	0.507976	0.00175472	0.267452	0.000797708	0.0530227	0.00765401	0.352572	Tagln2	transgelin 2
ML	ENSMUSG00000002546	0.306549	0.00463642	0.317284	0.000859208	0.0542256	0.0256842	0.423572	Golga2	golgi autoantigen, golgin subfamily a, 2
ML	ENSMUSG00000036686	0.219697	0.00218118	0.27612	0.000864533	0.0542256	0.0216448	0.413779	Cc2d1a	coiled-coil and C2 domain containing 1A
ML	ENSMUSG00000026213	0.550426	0.00138216	0.246336	0.000875954	0.0543219	0.00447306	0.330719	Stk11ip	serine/threonine kinase 11 interacting protein
ML	ENSMUSG00000079043	0.379193	0.0201385	0.425673	0.000886655	0.0546897	0.00262507	0.311381	Fastkd5	FAST kinase domains 5
ML	ENSMUSG00000022707	0.646498	0.00658787	0.331477	0.000888388	0.0546897	0.005982	0.340572	Gbe1	glucan (1,4-alpha-), branching enzyme 1
ML	ENSMUSG00000009076	0.557239	0.00536272	0.32276	0.000902403	0.0548516	0.00640977	0.345056	Zmat5	zinc finger, matrin type 5
ML	ENSMUSG00000041949	0.607391	0.00255706	0.286941	0.000902504	0.0548516	0.0416935	0.472421	Tango6	transport and golgi organization 6
ML	ENSMUSG00000023147	0.542354	0.0695546	0.556244	0.00092763	0.0553332	0.00275038	0.311751	Wrb	tryptophan rich basic protein
ML	ENSMUSG00000046572	0.894392	0.00194517	0.27182	0.00093537	0.0553341	0.00250894	0.308039	Zfp518b	zinc finger protein 518B
ML	ENSMUSG00000056917	0.467232	0.00146854	0.252529	0.000935888	0.0553341	0.00489185	0.331599	Sipa1	signal-induced proliferation associated gene 1
ML	ENSMUSG00000035692	2.03793	0.0064931	0.331155	0.000952767	0.0556314	0.0160119	0.389542	Isg15	ISG15 ubiquitin-like modifier
ML	ENSMUSG00000025507	0.68362	0.00406862	0.310646	0.00101295	0.0566779	0.0043433	0.327616	Pidd1	p53 induced death domain protein 1
ML	ENSMUSG00000064264	0.485243	0.00317976	0.292544	0.0010241	0.0567621	0.0178104	0.401895	Zfp428	zinc finger protein 428
ML	ENSMUSG00000033985	0.455765	0.00267328	0.286941	0.00103801	0.0568144	0.0065815	0.345581	Tesk2	testis-specific kinase 2
ML	ENSMUSG00000030780	0.624766	0.0221416	0.431694	0.00104337	0.0568144	0.00638552	0.345056	BC017158	cDNA sequence BC017158
ML	ENSMUSG00000006215	0.369304	0.00183516	0.27182	0.0010434	0.0568144	0.00733216	0.350865	Zbtb17	zinc finger and BTB domain containing 17
ML	ENSMUSG00000066705	1.5616	0.0026978	0.286941	0.001051	0.0568423	0.00269958	0.311381	Fxyd6	FXYD domain-containing ion transport regulator 6
ML	ENSMUSG00000032182	0.626464	0.00345277	0.298044	0.00105821	0.0568847	0.0455328	0.484245	Yipf2	Yip1 domain family, member 2
ML	ENSMUSG00000005370	0.562117	0.00186099	0.27182	0.00107224	0.0571679	0.00382246	0.322742	Msh6	mutS homolog 6 (E. coli)
ML	ENSMUSG00000031103	0.626467	0.00555464	0.323475	0.00108648	0.0573059	0.0130407	0.376445	Elf4	E74-like factor 4 (ets domain transcription factor)
ML	ENSMUSG00000033960	0.775726	0.0167468	0.402943	0.00110417	0.0575948	0.0153247	0.389542	9430020K01Rik	RIKEN cDNA 9430020K01 gene
ML	ENSMUSG00000040859	0.198071	0.00418531	0.310905	0.00112583	0.0576434	0.0242394	0.418447	Bsdc1	BSD domain containing 1
ML	ENSMUSG00000031099	1.63606	0.00375273	0.300352	0.00112621	0.0576434	0.0350105	0.458626	Smarca1	SWI/SNF related, matrix associated, actin dependent regulator of chromatin, subfamily a, member 1
ML	ENSMUSG00000027087	0.540913	0.0399761	0.497536	0.00115688	0.058344	0.0196203	0.409137	Itgav	integrin alpha V
ML	ENSMUSG00000019863	0.300948	0.0250315	0.444442	0.00116455	0.058344	0.0416509	0.472421	Qrsl1	glutaminyl-tRNA synthase (glutamine-hydrolyzing)-like 1
ML	ENSMUSG00000024457	0.476255	0.00958095	0.356244	0.00122326	0.0585295	0.0403836	0.46805	Trim26	tripartite motif-containing 26
ML	ENSMUSG00000030516	0.562854	0.00287641	0.288351	0.00122449	0.0585295	0.00352472	0.322742	Tjp1	tight junction protein 1
ML	ENSMUSG00000026939	1.14064	0.013273	0.383678	0.00126765	0.0589938	0.0317517	0.451829	Tmem141	transmembrane protein 141
ML	ENSMUSG00000034653	0.431457	0.00344656	0.298044	0.00127741	0.0589938	0.0164384	0.392879	Ythdc2	YTH domain containing 2
ML	ENSMUSG00000027466	0.544736	0.00885134	0.351939	0.00128305	0.0589938	0.0389547	0.465688	Rbck1	RanBP-type and C3HC4-type zinc finger containing 1
ML	ENSMUSG00000035237	1.0049	0.0160192	0.400677	0.00128586	0.0590073	0.0083023	0.35606	Lcat	lecithin cholesterol acyltransferase
ML	ENSMUSG00000068744	1.08989	0.00610793	0.329267	0.00129913	0.0590617	0.0171668	0.397961	Psrc1	proline/serine-rich coiled-coil 1
ML	ENSMUSG00000006494	0.531686	0.0448875	0.512124	0.00130874	0.0591417	0.0077933	0.352572	Pdk1	pyruvate dehydrogenase kinase, isoenzyme 1
ML	ENSMUSG00000038759	0.332473	0.0128369	0.378536	0.0013334	0.0597018	0.00604751	0.341567	Nup205	nucleoporin 205
ML	ENSMUSG00000017132	0.0802207	0.792196	0.958707	0.00134823	0.0599928	0.00646783	0.345056	Cyth1	cytohesin 1
ML	ENSMUSG00000006456	0.303541	0.0101116	0.358257	0.00144274	0.0605461	0.00921958	0.357379	Rbm14	RNA binding motif protein 14
ML	ENSMUSG00000093445	0.195508	0.0429353	0.505669	0.00145115	0.0607168	0.00736185	0.350865	Lrch4	leucine-rich repeats and calponin homology (CH) domain containing 4
ML	ENSMUSG00000004661	0.398172	0.107654	0.612892	0.00147688	0.0610316	0.00582721	0.339387	Arid3b	AT rich interactive domain 3B (BRIGHT-like)
ML	ENSMUSG00000061778	0.346953	0.029678	0.463791	0.00148239	0.061152	0.0193876	0.40766	Mospd2	motile sperm domain containing 2
ML	ENSMUSG00000058290	0.601567	0.0810355	0.57459	0.00150216	0.0614124	0.0170806	0.397673	Espl1	extra spindle pole bodies 1 (S. cerevisiae)
ML	ENSMUSG00000049287	0.792318	0.00109047	0.232885	0.00151453	0.0614124	0.00360213	0.322742	Iba57	IBA57, iron-sulfur cluster assembly homolog (S. cerevisiae)
ML	ENSMUSG00000033222	0.558535	0.0052875	0.321531	0.00155446	0.0621584	0.0098774	0.357738	Ttf2	transcription termination factor, RNA polymerase II
ML	ENSMUSG00000015363	0.27034	0.0720929	0.559331	0.00158581	0.0625071	0.0091595	0.357379	Trabd	TraB domain containing
ML	ENSMUSG00000062175	0.722269	0.00670893	0.332793	0.00160849	0.0627099	0.0351874	0.458626	Tgif2	TGFB-induced factor homeobox 2
ML	ENSMUSG00000029538	0.324674	0.0905085	0.590946	0.0016094	0.0627099	0.00625503	0.345056	Srsf9	serine/arginine-rich splicing factor 9
ML	ENSMUSG00000041936	1.23378	0.00366717	0.299108	0.00161812	0.0628462	0.00821215	0.356022	Agrn	agrin
ML	ENSMUSG00000059674	0.800041	0.0378066	0.490623	0.00162749	0.0629306	0.00673959	0.348171	Cdh24	cadherin-like 24
ML	ENSMUSG00000024131	0.662293	0.00623984	0.329267	0.00164039	0.0629306	0.0240745	0.418257	Slc3a1	solute carrier family 3, member 1
ML	ENSMUSG00000028840	0.524584	0.00274794	0.286941	0.00165013	0.0629306	0.00428996	0.327259	Zfp593	zinc finger protein 593
ML	ENSMUSG00000038695	0.328544	0.0601736	0.542264	0.0016505	0.0629306	0.00970972	0.357379	Josd2	Josephin domain containing 2
ML	ENSMUSG00000030513	1.53063	0.00903321	0.351939	0.00165199	0.0629306	0.00623424	0.345056	Pcsk6	proprotein convertase subtilisin/kexin type 6
ML	ENSMUSG00000010663	0.705645	0.00525006	0.320173	0.0016542	0.0629306	0.0417178	0.472421	Fads1	fatty acid desaturase 1
ML	ENSMUSG00000034820	0.236462	0.0045075	0.315828	0.0016735	0.063306	0.0137441	0.381406	Cpsf7	cleavage and polyadenylation specific factor 7
ML	ENSMUSG00000037887	0.747179	0.00777212	0.341221	0.00170813	0.0639236	0.019315	0.407587	Dusp8	dual specificity phosphatase 8
ML	ENSMUSG00000062480	0.737661	0.0059434	0.328585	0.001745	0.0639872	0.00971333	0.357379	Acat3	acetyl-Coenzyme A acetyltransferase 3
ML	ENSMUSG00000066800	1.24867	0.00485285	0.320172	0.00174942	0.0639872	0.0331445	0.456142	Rnasel	ribonuclease L (2', 5'-oligoisoadenylate synthetase-dependent)
ML	ENSMUSG00000000915	0.957446	0.0346789	0.478572	0.00176107	0.0639872	0.00529885	0.333059	Hip1r	huntingtin interacting protein 1 related
ML	ENSMUSG00000052833	0.217444	0.0137032	0.385671	0.00177011	0.0640097	0.00999268	0.358454	Sae1	SUMO1 activating enzyme subunit 1
ML	ENSMUSG00000026098	0.451616	0.0221169	0.431694	0.00177547	0.0640165	0.0166399	0.395245	Pms1	postmeiotic segregation increased 1 (S. cerevisiae)
ML	ENSMUSG00000091803	0.475045	0.018371	0.415873	0.00178237	0.0641535	0.015475	0.389542	Cox16	cytochrome c oxidase assembly protein 16
ML	ENSMUSG00000071655	0.304133	0.00456757	0.316162	0.00179152	0.0642949	0.0426264	0.474641	Ubxn1	UBX domain protein 1
ML	ENSMUSG00000029821	1.13678	0.00582176	0.32602	0.00179278	0.0642949	0.00567853	0.337827	Dfna5	deafness, autosomal dominant 5 (human)
ML	ENSMUSG00000044950	0.473765	0.0109878	0.367134	0.00183226	0.0647327	0.00927784	0.357379	Pwwp2a	PWWP domain containing 2A
ML	ENSMUSG00000052296	0.278932	0.00624895	0.329267	0.0018571	0.0650931	0.0295587	0.442063	Ppp6r1	protein phosphatase 6, regulatory subunit 1
ML	ENSMUSG00000002741	0.344381	0.0317907	0.469904	0.00196069	0.0663623	0.0124542	0.372856	Ykt6	YKT6 homolog (S. Cerevisiae)
ML	ENSMUSG00000041346	0.496027	0.0041662	0.310905	0.00197052	0.0664076	0.016998	0.397343	Wrap53	WD repeat containing, antisense to Trp53
ML	ENSMUSG00000071650	0.366431	0.00566655	0.323851	0.00207502	0.0675919	0.00762234	0.352572	Ganab	alpha glucosidase 2 alpha neutral subunit
ML	ENSMUSG00000033763	0.73348	0.00381569	0.302614	0.00212798	0.0680238	0.011735	0.368731	Mtss1l	metastasis suppressor 1-like
ML	ENSMUSG00000045273	0.970164	0.0037556	0.300352	0.00213729	0.0680238	0.0132571	0.378139	Cenph	centromere protein H
ML	ENSMUSG00000056366	1.84277	0.0115555	0.368429	0.00214595	0.0680309	0.00885614	0.357041	Fabp3-ps1	fatty acid binding protein 3, muscle and heart, pseudogene 1
ML	ENSMUSG00000032085	0.670097	0.0421161	0.503461	0.00215018	0.0680309	0.010453	0.36215	Tagln	transgelin
ML	ENSMUSG00000009614	0.797834	0.0502585	0.525562	0.00217891	0.0680309	0.0366557	0.46257	Sardh	sarcosine dehydrogenase
ML	ENSMUSG00000040033	0.279095	0.448749	0.855751	0.00218677	0.0680309	0.00564546	0.337827	Stat2	signal transducer and activator of transcription 2
ML	ENSMUSG00000029165	0.516898	0.0119733	0.374213	0.00222644	0.068718	0.00900646	0.357379	Agbl5	ATP/GTP binding protein-like 5
ML	ENSMUSG00000019214	0.789949	0.0114351	0.368125	0.00223039	0.0687755	0.0379263	0.462985	Chtf18	CTF18, chromosome transmission fidelity factor 18
ML	ENSMUSG00000038650	0.910827	0.00847113	0.348853	0.00226181	0.0688775	0.0445787	0.481626	Rnh1	ribonuclease/angiogenin inhibitor 1
ML	ENSMUSG00000059323	0.751988	0.033855	0.477778	0.00230044	0.0694212	0.00755323	0.352572	Tonsl	tonsoku-like, DNA repair protein
ML	ENSMUSG00000050315	1.42147	0.0132483	0.383678	0.00230607	0.0694534	0.00880518	0.356795	Synpo2	synaptopodin 2
ML	ENSMUSG00000031557	0.513523	0.0520995	0.529012	0.00231668	0.0695819	0.00735845	0.350865	Plekha2	pleckstrin homology domain-containing, family A (phosphoinositide binding specific) member 2
ML	ENSMUSG00000040312	0.570518	0.00278357	0.286946	0.00232914	0.0697001	0.0318198	0.452387	Cchcr1	coiled-coil alpha-helical rod protein 1
ML	ENSMUSG00000027163	0.328105	0.0163802	0.402181	0.00242951	0.0708934	0.0100648	0.358731	Commd9	COMM domain containing 9
ML	ENSMUSG00000055762	0.23445	0.0285936	0.458526	0.00246486	0.0709994	0.0218836	0.414201	Eef1d	eukaryotic translation elongation factor 1 delta (guanine nucleotide exchange protein)
ML	ENSMUSG00000022360	0.508523	0.07147	0.558488	0.00247649	0.0709994	0.0104079	0.361656	Atad2	ATPase family, AAA domain containing 2
ML	ENSMUSG00000013160	0.206681	0.0463922	0.517105	0.00249852	0.0713543	0.0419295	0.472779	Atp6v0d1	ATPase, H+ transporting, lysosomal V0 subunit D1
ML	ENSMUSG00000003190	0.650497	0.00455894	0.316162	0.00254834	0.0716724	0.0151176	0.389542	Bcl2l12	BCL2-like 12 (proline rich)
ML	ENSMUSG00000030042	0.302351	0.262816	0.755251	0.00255115	0.0716724	0.0145302	0.387697	Pole4	polymerase (DNA-directed), epsilon 4 (p12 subunit)
ML	ENSMUSG00000031024	0.546702	0.0515411	0.527835	0.00255422	0.0716724	0.0295995	0.44225	St5	suppression of tumorigenicity 5
ML	ENSMUSG00000001552	0.63507	0.00672238	0.332793	0.00269198	0.073079	0.00888516	0.357141	Jup	junction plakoglobin
ML	ENSMUSG00000002227	0.551292	0.0458368	0.5154	0.0027347	0.0735284	0.00552208	0.335796	Mov10	Moloney leukemia virus 10
ML	ENSMUSG00000039515	0.461603	0.0366013	0.485956	0.00275066	0.0735803	0.0130439	0.376445	Ppp2r4	protein phosphatase 2A activator, regulatory subunit B
ML	ENSMUSG00000026447	1.64835	0.00366001	0.299108	0.00275888	0.0736256	0.00980619	0.357379	Pik3c2b	phosphoinositide-3-kinase, class 2, beta polypeptide
ML	ENSMUSG00000034412	0.618662	0.0147546	0.393777	0.00276696	0.0736444	0.0421259	0.473392	Tbc1d10a	TBC1 domain family, member 10a
ML	ENSMUSG00000031378	0.350194	0.0704408	0.557082	0.00279805	0.0737884	0.0108625	0.363797	Abcd1	ATP-binding cassette, sub-family D (ALD), member 1
ML	ENSMUSG00000006369	1.49546	0.0155932	0.398945	0.00280546	0.0737884	0.0125478	0.372856	Fbln1	fibulin 1
ML	ENSMUSG00000046598	1.23948	0.00689204	0.335342	0.00281467	0.073867	0.0368089	0.46257	Bdh1	3-hydroxybutyrate dehydrogenase, type 1
ML	ENSMUSG00000024735	0.242045	0.11367	0.620898	0.00282336	0.0739425	0.015697	0.389542	Prpf19	PRP19/PSO4 pre-mRNA processing factor 19 homolog (S. cerevisiae)
ML	ENSMUSG00000039253	0.634111	0.00456161	0.316162	0.00285508	0.0741879	0.00985609	0.357616	Fn3krp	fructosamine 3 kinase related protein
ML	ENSMUSG00000030600	0.799453	0.0259491	0.448756	0.00295376	0.0753777	0.0409639	0.469599	Lrfn1	leucine rich repeat and fibronectin type III domain containing 1
ML	ENSMUSG00000063810	0.53212	0.00302369	0.292544	0.00297294	0.075563	0.00726794	0.350865	Alms1	Alstrom syndrome 1
ML	ENSMUSG00000029345	0.186748	0.00828734	0.347987	0.00298419	0.0756031	0.00762999	0.352572	Tfip11	tuftelin interacting protein 11
ML	ENSMUSG00000005804	0.545285	0.175155	0.689104	0.00300269	0.0758263	0.0132607	0.378139	Bloc1s6	biogenesis of lysosomal organelles complex-1, subunit 6, pallidin
ML	ENSMUSG00000028453	0.765393	0.0151103	0.397135	0.00302531	0.0761112	0.0132191	0.378139	Fancg	Fanconi anemia, complementation group G
ML	ENSMUSG00000003549	0.305349	0.026402	0.448756	0.00303815	0.076196	0.0221291	0.41455	Ercc1	excision repair cross-complementing rodent repair deficiency, complementation group 1
ML	ENSMUSG00000030722	0.574868	0.0697671	0.556244	0.0030468	0.0762425	0.00910197	0.357379	Nfatc2ip	nuclear factor of activated T cells, cytoplasmic, calcineurin dependent 2 interacting protein
ML	ENSMUSG00000022574	1.03186	0.0174733	0.409156	0.0030703	0.0765133	0.0172262	0.397961	Naprt	nicotinate phosphoribosyltransferase
ML	ENSMUSG00000024436	0.26797	0.044201	0.510363	0.00310763	0.0769568	0.0139475	0.381777	Mrps18b	mitochondrial ribosomal protein S18B
ML	ENSMUSG00000037013	0.419121	0.0060409	0.329267	0.00319825	0.0775372	0.0128251	0.374658	Ss18	synovial sarcoma translocation, Chromosome 18
ML	ENSMUSG00000023764	0.571839	0.0106588	0.364259	0.00323687	0.0778903	0.0403956	0.46805	Sfi1	Sfi1 homolog, spindle assembly associated (yeast)
ML	ENSMUSG00000025352	0.465229	0.107883	0.61304	0.00324281	0.0779146	0.0387553	0.465688	Gdf11	growth differentiation factor 11
ML	ENSMUSG00000026434	0.287178	0.137657	0.65165	0.00331762	0.0788149	0.0117971	0.368795	Nucks1	nuclear casein kinase and cyclin-dependent kinase substrate 1
ML	ENSMUSG00000021196	0.708256	0.0359815	0.483332	0.00335481	0.079169	0.0126966	0.373693	Pfkp	phosphofructokinase, platelet
ML	ENSMUSG00000036931	0.701342	0.00545054	0.323475	0.00338015	0.07942	0.00885079	0.357041	Nfkbid	nuclear factor of kappa light polypeptide gene enhancer in B cells inhibitor, delta
ML	ENSMUSG00000030590	0.749614	0.00490941	0.320172	0.00339128	0.0794251	0.0120832	0.370843	Fam98c	family with sequence similarity 98, member C
ML	ENSMUSG00000090290	0.731201	0.00847146	0.348853	0.00350557	0.0802762	0.0244808	0.418823	Gm17296	predicted gene, 17296
ML	ENSMUSG00000036879	0.66264	0.00771373	0.340333	0.00356849	0.0810842	0.0185137	0.405862	Phkb	phosphorylase kinase beta
ML	ENSMUSG00000029283	0.50309	0.0861012	0.583499	0.00357879	0.0810842	0.0164193	0.392879	Cdc7	cell division cycle 7 (S. cerevisiae)
ML	ENSMUSG00000055485	0.0349046	0.886583	0.977891	0.0036136	0.081387	0.018264	0.404149	Soga1	suppressor of glucose, autophagy associated 1
ML	ENSMUSG00000072258	0.623417	0.0917033	0.592054	0.00361665	0.081387	0.011346	0.365219	Taf1a	TATA box binding protein (Tbp)-associated factor, RNA polymerase I, A
ML	ENSMUSG00000020630	0.418405	0.00549077	0.323475	0.00366187	0.0815211	0.010066	0.358731	Rnaseh1	ribonuclease H1
ML	ENSMUSG00000021265	0.381839	0.244591	0.745364	0.00370794	0.081793	0.0109943	0.363797	Slc25a29	solute carrier family 25 (mitochondrial carrier, palmitoylcarnitine transporter), member 29
ML	ENSMUSG00000035958	0.51095	0.036541	0.485956	0.00371294	0.081793	0.0252364	0.421492	Tdp2	tyrosyl-DNA phosphodiesterase 2
ML	ENSMUSG00000001910	0.364755	0.00753471	0.338247	0.00376224	0.0819752	0.0425236	0.474641	Nacc1	nucleus accumbens associated 1, BEN and BTB (POZ) domain containing
ML	ENSMUSG00000009090	0.294108	0.00316244	0.292544	0.00376997	0.0819752	0.0173736	0.397961	Ap1b1	adaptor protein complex AP-1, beta 1 subunit
ML	ENSMUSG00000035278	0.202051	0.0166406	0.402807	0.00378395	0.0819752	0.0395439	0.466229	Plekhj1	pleckstrin homology domain containing, family J member 1
ML	ENSMUSG00000039347	1.02599	0.0123504	0.375554	0.00380316	0.0819752	0.00839614	0.35606	Atp6v0e2	ATPase, H+ transporting, lysosomal V0 subunit E2
ML	ENSMUSG00000034285	0.638131	0.0449936	0.512924	0.00380467	0.0819752	0.0207579	0.413326	Nipsnap1	4-nitrophenylphosphatase domain and non-neuronal SNAP25-like protein homolog 1 (C. elegans)
ML	ENSMUSG00000026779	0.335656	0.219628	0.728168	0.00380749	0.0819752	0.0235247	0.417729	Mastl	microtubule associated serine/threonine kinase-like
ML	ENSMUSG00000009585	1.19697	0.00796872	0.344785	0.00381119	0.0819965	0.0161155	0.39009	Apobec3	apolipoprotein B mRNA editing enzyme, catalytic polypeptide 3
ML	ENSMUSG00000020917	0.475181	0.0104611	0.362141	0.00383859	0.0822416	0.00984106	0.357576	Acly	ATP citrate lyase
ML	ENSMUSG00000074102	0.236395	0.0125909	0.375823	0.00384789	0.0822416	0.0154513	0.389542	Rbm15b	RNA binding motif protein 15B
ML	ENSMUSG00000050912	0.981225	0.00840091	0.348501	0.00389005	0.0825806	0.0434877	0.477775	Tmem123	transmembrane protein 123
ML	ENSMUSG00000070319	0.301289	0.029793	0.463791	0.00389983	0.0825806	0.0216442	0.413779	Eif3g	eukaryotic translation initiation factor 3, subunit G
ML	ENSMUSG00000020747	0.32086	0.0197366	0.422876	0.00392519	0.0825816	0.0103854	0.361656	2310067B10Rik	RIKEN cDNA 2310067B10 gene
ML	ENSMUSG00000035390	0.30577	0.612436	0.912663	0.00396034	0.0828082	0.0135568	0.380504	Brsk1	BR serine/threonine kinase 1
ML	ENSMUSG00000025512	0.327175	0.00963463	0.35642	0.00399094	0.0830473	0.0187562	0.407103	Chid1	chitinase domain containing 1
ML	ENSMUSG00000031295	0.553599	0.0261299	0.448756	0.00402831	0.0833733	0.038137	0.46406	Phka2	phosphorylase kinase alpha 2
ML	ENSMUSG00000030275	0.497647	0.0894064	0.589848	0.00404611	0.083401	0.0174106	0.397961	Etnk1	ethanolamine kinase 1
ML	ENSMUSG00000003269	0.254704	0.0440585	0.509737	0.00406217	0.0834789	0.019652	0.409137	Cyth2	cytohesin 2
ML	ENSMUSG00000051403	0.115286	0.210127	0.72182	0.00406294	0.0834789	0.0374675	0.46257	Ppp1r37	protein phosphatase 1, regulatory subunit 37
ML	ENSMUSG00000062929	0.410389	0.0168807	0.404726	0.00406325	0.0834789	0.0109417	0.363797	Cfl2	cofilin 2, muscle
ML	ENSMUSG00000031398	0.953617	0.0149488	0.395143	0.0040893	0.0836647	0.0345846	0.458471	Plxna3	plexin A3
ML	ENSMUSG00000053134	0.229765	0.211077	0.722244	0.00417781	0.0839729	0.0219807	0.414499	Supt7l	suppressor of Ty 7-like
ML	ENSMUSG00000073705	0.703308	0.0143396	0.390926	0.00418667	0.0840001	0.0495311	0.491964	Apitd1	apoptosis-inducing, TAF9-like domain 1
ML	ENSMUSG00000038208	0.296843	0.20489	0.717729	0.0042234	0.0842258	0.0214086	0.413779	Pgap3	post-GPI attachment to proteins 3
ML	ENSMUSG00000028954	0.314606	0.0298633	0.463791	0.00429604	0.0845936	0.0192853	0.407587	Nub1	negative regulator of ubiquitin-like proteins 1
ML	ENSMUSG00000038644	0.507739	0.0191933	0.419382	0.00431066	0.0846156	0.0280068	0.435501	Pold1	polymerase (DNA directed), delta 1, catalytic subunit
ML	ENSMUSG00000021391	0.765927	0.0121776	0.375164	0.00433868	0.0848929	0.0300034	0.444325	Cenpp	centromere protein P
ML	ENSMUSG00000033031	0.564293	0.028092	0.457161	0.00440232	0.0856118	0.023764	0.41803	C330027C09Rik	RIKEN cDNA C330027C09 gene
ML	ENSMUSG00000043241	0.168482	0.098295	0.601729	0.00442595	0.0857871	0.0160977	0.389942	Upf2	UPF2 regulator of nonsense transcripts homolog (yeast)
ML	ENSMUSG00000030826	0.20234	0.272712	0.763028	0.00453804	0.0866875	0.0123283	0.371709	Bcat2	branched chain aminotransferase 2, mitochondrial
ML	ENSMUSG00000048701	0.351606	0.171234	0.684324	0.00459571	0.0868542	0.0225898	0.416176	Ccdc6	coiled-coil domain containing 6
ML	ENSMUSG00000021493	0.482046	0.00720803	0.335342	0.00461603	0.0869581	0.0109444	0.363797	Pdlim7	PDZ and LIM domain 7
ML	ENSMUSG00000037316	0.319216	0.0610109	0.543142	0.00464462	0.0870809	0.0112585	0.364982	Bag4	BCL2-associated athanogene 4
ML	ENSMUSG00000021782	0.342827	0.00701053	0.335342	0.00466151	0.087296	0.0169532	0.397139	Dlg5	discs, large homolog 5 (Drosophila)
ML	ENSMUSG00000024384	0.39003	0.00705673	0.335342	0.0046893	0.0874957	0.0233005	0.417729	Iws1	IWS1 homolog (S. cerevisiae)
ML	ENSMUSG00000035228	0.674354	0.256232	0.751757	0.00474055	0.0877891	0.0125261	0.372856	Ccdc106	coiled-coil domain containing 106
ML	ENSMUSG00000055633	0.350054	0.0424656	0.504756	0.00475512	0.0878855	0.0268021	0.430457	Zfp580	zinc finger protein 580
ML	ENSMUSG00000001855	0.173456	0.0166993	0.402807	0.00476909	0.088016	0.0120847	0.370843	Nup214	nucleoporin 214
ML	ENSMUSG00000002803	0.190617	0.196357	0.711525	0.00480504	0.0883559	0.0198849	0.409137	Btbd6	BTB (POZ) domain containing 6
ML	ENSMUSG00000037020	0.575152	0.0169436	0.404998	0.00483127	0.0885121	0.0246768	0.419542	Wdr62	WD repeat domain 62
ML	ENSMUSG00000043445	0.21352	0.0922164	0.592824	0.00484314	0.088518	0.0410744	0.469844	Pgp	phosphoglycolate phosphatase
ML	ENSMUSG00000006390	0.177968	0.145827	0.659994	0.00484702	0.088518	0.0277824	0.43417	Elovl1	elongation of very long chain fatty acids (FEN1/Elo2, SUR4/Elo3, yeast)-like 1
ML	ENSMUSG00000087687	0.342282	0.00939124	0.355301	0.00486954	0.0885195	0.0189431	0.407587	Pet100	PET100 homolog (S. cerevisiae)
ML	ENSMUSG00000024660	0.497816	0.0562454	0.538535	0.00493062	0.0888553	0.0228345	0.41667	Incenp	inner centromere protein
ML	ENSMUSG00000007589	0.692504	0.0142049	0.388865	0.00495831	0.088963	0.0331417	0.456142	Tinf2	Terf1 (TRF1)-interacting nuclear factor 2
ML	ENSMUSG00000029034	0.312269	0.0230633	0.436299	0.0049969	0.0892615	0.0221678	0.41455	Cpsf3l	cleavage and polyadenylation specific factor 3-like
ML	ENSMUSG00000039242	0.690584	0.0192641	0.419382	0.00501622	0.0893494	0.0155496	0.389542	B3galnt2	UDP-GalNAc:betaGlcNAc beta 1,3-galactosaminyltransferase, polypeptide 2
ML	ENSMUSG00000019947	0.326177	0.0191754	0.419382	0.00503164	0.0894397	0.0327927	0.454922	Arid5b	AT rich interactive domain 5B (MRF1-like)
ML	ENSMUSG00000008435	0.683709	0.0255333	0.446337	0.00505582	0.0897336	0.0194424	0.408283	Rdh13	retinol dehydrogenase 13 (all-trans and 9-cis)
ML	ENSMUSG00000031310	0.432999	0.0144681	0.392693	0.00511338	0.0900491	0.0156839	0.389542	Zmym3	zinc finger, MYM-type 3
ML	ENSMUSG00000026463	0.600102	0.238639	0.740428	0.00515323	0.0901616	0.0210774	0.413463	Atp2b4	ATPase, Ca++ transporting, plasma membrane 4
ML	ENSMUSG00000026519	0.384597	0.100199	0.604083	0.00516248	0.0901616	0.0289097	0.437894	Tmem63a	transmembrane protein 63a
ML	ENSMUSG00000015882	0.579365	0.0185298	0.41681	0.00518511	0.090254	0.0288881	0.43788	Lcorl	ligand dependent nuclear receptor corepressor-like
ML	ENSMUSG00000052533	0.340665	0.0299966	0.463791	0.00525479	0.0903959	0.0269284	0.431443	Nup188	nucleoporin 188
ML	ENSMUSG00000036099	0.418667	0.0134762	0.385287	0.00545406	0.0919356	0.0175506	0.39986	Vezt	vezatin, adherens junctions transmembrane protein
ML	ENSMUSG00000036450	0.632552	0.0161924	0.401488	0.00563233	0.0928446	0.0154302	0.389542	Hif1an	hypoxia-inducible factor 1, alpha subunit inhibitor
ML	ENSMUSG00000054008	0.288806	0.0828105	0.577718	0.00564646	0.092895	0.0220698	0.41455	Ndst1	N-deacetylase/N-sulfotransferase (heparan glucosaminyl) 1
ML	ENSMUSG00000020974	0.632853	0.0205574	0.42811	0.00570264	0.0929467	0.0331008	0.456142	Pole2	polymerase (DNA directed), epsilon 2 (p59 subunit)
ML	ENSMUSG00000056394	0.480565	0.0853428	0.582001	0.00572577	0.093029	0.0231351	0.417729	Lig1	ligase I, DNA, ATP-dependent
ML	ENSMUSG00000031756	0.970009	0.0159641	0.400677	0.00573507	0.0930716	0.0152073	0.389542	Cenpn	centromere protein N
ML	ENSMUSG00000071337	0.255643	0.0251213	0.444732	0.00573874	0.0930716	0.0283622	0.435601	Tia1	cytotoxic granule-associated RNA binding protein 1
ML	ENSMUSG00000036427	0.387661	0.00714936	0.335342	0.00578828	0.0935067	0.013417	0.379892	Gpi1	glucose phosphate isomerase 1
ML	ENSMUSG00000022390	0.322271	0.0259344	0.448756	0.00582007	0.0937158	0.0251713	0.421492	Zc3h7b	zinc finger CCCH type containing 7B
ML	ENSMUSG00000031367	0.787406	0.035816	0.483332	0.00582935	0.0937158	0.0244597	0.418823	Ap1s2	adaptor-related protein complex 1, sigma 2 subunit
ML	ENSMUSG00000022562	0.617668	0.0547871	0.534445	0.0059429	0.0945183	0.0225524	0.416164	Oplah	5-oxoprolinase (ATP-hydrolysing)
ML	ENSMUSG00000022617	0.294567	0.0287618	0.458982	0.00594351	0.0945183	0.0282724	0.435601	Chkb	choline kinase beta
ML	ENSMUSG00000026646	0.767955	0.0387288	0.492819	0.00595306	0.0945416	0.0203337	0.41057	Suv39h2	suppressor of variegation 3-9 homolog 2 (Drosophila)
ML	ENSMUSG00000004929	0.207571	0.203874	0.717255	0.00597687	0.0946984	0.0470406	0.486615	Thop1	thimet oligopeptidase 1
ML	ENSMUSG00000036980	0.114568	0.170393	0.683497	0.00608186	0.0955017	0.026677	0.429753	Taf6	TAF6 RNA polymerase II, TATA box binding protein (TBP)-associated factor
ML	ENSMUSG00000036862	1.05012	0.0838707	0.579413	0.00609762	0.0955116	0.0325639	0.454718	Dchs1	dachsous 1 (Drosophila)
ML	ENSMUSG00000020697	0.319222	0.136126	0.649746	0.00610112	0.0955116	0.0296426	0.442346	Lig3	ligase III, DNA, ATP-dependent
ML	ENSMUSG00000032508	0.471301	0.0120403	0.374759	0.00613517	0.0955116	0.0480618	0.489215	Myd88	myeloid differentiation primary response gene 88
ML	ENSMUSG00000048450	1.09627	0.0201177	0.425673	0.00613862	0.0955179	0.0182589	0.404149	Msx1	msh homeobox 1
ML	ENSMUSG00000038957	0.336895	0.0133412	0.384368	0.00616031	0.0956877	0.0150862	0.389542	Edc3	enhancer of mRNA decapping 3 homolog (S. cerevisiae)
ML	ENSMUSG00000023908	0.711924	0.00784408	0.342124	0.0061724	0.0957895	0.0258124	0.424905	Pkmyt1	protein kinase, membrane associated tyrosine/threonine 1
ML	ENSMUSG00000030045	0.331514	0.0424687	0.504756	0.00622396	0.0960499	0.0277403	0.43412	Mrpl19	mitochondrial ribosomal protein L19
ML	ENSMUSG00000028187	0.323165	0.0171916	0.406989	0.00641386	0.0971475	0.0158615	0.389542	Rpf1	ribosome production factor 1 homolog (S. cerevisiae)
ML	ENSMUSG00000033009	0.236953	0.44927	0.855958	0.00642343	0.0971475	0.01994	0.409137	Ogfod1	2-oxoglutarate and iron-dependent oxygenase domain containing 1
ML	ENSMUSG00000025857	0.306999	0.155703	0.670375	0.006459	0.0972787	0.0193191	0.407587	Dnaaf5	dynein, axonemal, assembly factor 5
ML	ENSMUSG00000022706	0.330958	0.0352292	0.480347	0.00653425	0.0979721	0.0342171	0.457757	Mrpl40	mitochondrial ribosomal protein L40
ML	ENSMUSG00000022434	0.040061	0.856661	0.972234	0.00654962	0.0980115	0.0182476	0.404149	Fam118a	family with sequence similarity 118, member A
ML	ENSMUSG00000029730	0.357517	0.0544352	0.533277	0.00657	0.0980384	0.037686	0.46257	Mcm7	minichromosome maintenance deficient 7 (S. cerevisiae)
ML	ENSMUSG00000052456	0.129616	0.0180973	0.414098	0.00660098	0.0982197	0.0426323	0.474641	Asna1	arsA arsenite transporter, ATP-binding, homolog 1 (bacterial)
ML	ENSMUSG00000026853	0.344174	0.152809	0.668084	0.00662716	0.0983439	0.0266347	0.429753	Crat	carnitine acetyltransferase
ML	ENSMUSG00000029557	0.473135	0.10129	0.60566	0.00679929	0.0991818	0.0199199	0.409137	Ftsj2	FtsJ homolog 2 (E. coli)
ML	ENSMUSG00000026496	0.632598	0.0377962	0.490623	0.00680877	0.0991948	0.0173375	0.397961	Parp1	poly (ADP-ribose) polymerase family, member 1
ML	ENSMUSG00000006782	0.842635	0.0146619	0.39289	0.00686013	0.099408	0.0295854	0.44225	Cnp	2',3'-cyclic nucleotide 3' phosphodiesterase
ML	ENSMUSG00000039367	0.123351	0.0753223	0.566183	0.00691585	0.0995551	0.0348697	0.458564	Sec24c	Sec24 related gene family, member C (S. cerevisiae)
ML	ENSMUSG00000005534	0.439402	0.0507505	0.526069	0.00693673	0.0995551	0.038689	0.465688	Insr	insulin receptor
ML	ENSMUSG00000034640	0.45591	0.02141	0.429987	0.006962	0.0997653	0.0172549	0.397961	Tiparp	TCDD-inducible poly(ADP-ribose) polymerase
ML	ENSMUSG00000025503	0.235225	0.027756	0.455868	0.00702529	0.100061	0.0298885	0.443786	Taldo1	transaldolase 1
ML	ENSMUSG00000034761	0.233883	0.101857	0.605717	0.0071217	0.100517	0.0298926	0.443786	Map4k5	mitogen-activated protein kinase kinase kinase kinase 5
ML	ENSMUSG00000024844	0.230068	0.0218376	0.430013	0.00722524	0.10113	0.0193271	0.407587	Banf1	barrier to autointegration factor 1
ML	ENSMUSG00000022952	0.482754	0.0338824	0.477778	0.0072364	0.101197	0.0224378	0.414892	Runx1	runt related transcription factor 1
ML	ENSMUSG00000002578	0.196784	0.479375	0.866514	0.00726102	0.101238	0.0181797	0.404149	Ikzf4	IKAROS family zinc finger 4
ML	ENSMUSG00000024958	0.752326	0.034814	0.478572	0.00728657	0.101474	0.0179169	0.403023	Gpr137	G protein-coupled receptor 137
ML	ENSMUSG00000000056	0.275263	0.412412	0.839154	0.00730743	0.101584	0.0234869	0.417729	Narf	nuclear prelamin A recognition factor
ML	ENSMUSG00000033589	0.424789	0.0262638	0.448756	0.007432	0.102212	0.044846	0.482666	Reep4	receptor accessory protein 4
ML	ENSMUSG00000056486	1.0889	0.064838	0.547154	0.00754249	0.10264	0.0246122	0.419542	Chn1	chimerin 1
ML	ENSMUSG00000067825	0.670737	0.00779132	0.341221	0.00760711	0.102754	0.0199292	0.409137	Pex26	peroxisomal biogenesis factor 26
ML	ENSMUSG00000036819	0.942304	0.01405	0.387834	0.00761196	0.102774	0.0417727	0.472421	Jmjd4	jumonji domain containing 4
ML	ENSMUSG00000037603	0.886928	0.0124463	0.375823	0.00766185	0.103035	0.0320162	0.45312	Gm5519	predicted pseudogene 5519
ML	ENSMUSG00000002297	0.491033	0.0823262	0.577005	0.00770787	0.103037	0.046543	0.486615	Dbf4	DBF4 homolog (S. cerevisiae)
ML	ENSMUSG00000039298	0.399801	0.0182909	0.415568	0.00771564	0.103037	0.0201801	0.41016	Cdk5rap2	CDK5 regulatory subunit associated protein 2
ML	ENSMUSG00000028967	0.817908	0.0309417	0.466737	0.00771603	0.103037	0.0217224	0.413779	Errfi1	ERBB receptor feedback inhibitor 1
ML	ENSMUSG00000027942	0.177908	0.266057	0.757604	0.00772849	0.103037	0.0326796	0.454718	4933434E20Rik	RIKEN cDNA 4933434E20 gene
ML	ENSMUSG00000043885	0.253483	0.37869	0.821339	0.00789938	0.103677	0.0185354	0.405862	Slc36a4	solute carrier family 36 (proton/amino acid symporter), member 4
ML	ENSMUSG00000030815	0.382504	0.0149921	0.39579	0.00792488	0.103715	0.0228664	0.41667	Phkg2	phosphorylase kinase, gamma 2 (testis)
ML	ENSMUSG00000062054	0.252834	0.057297	0.540122	0.00796666	0.103801	0.0221395	0.41455	Iah1	isoamyl acetate-hydrolyzing esterase 1 homolog (S. cerevisiae)
ML	ENSMUSG00000040258	1.02523	0.0242172	0.44145	0.00797769	0.103828	0.0333729	0.456863	Nxph4	neurexophilin 4
ML	ENSMUSG00000001150	0.168319	0.229477	0.734923	0.00799753	0.103847	0.040575	0.468491	Mcm3ap	minichromosome maintenance deficient 3 (S. cerevisiae) associated protein
ML	ENSMUSG00000022428	0.292382	0.0784969	0.570174	0.008066	0.104104	0.0369027	0.46257	Cby1	chibby homolog 1 (Drosophila)
ML	ENSMUSG00000036167	0.340025	0.0370943	0.489076	0.00809512	0.104231	0.0192723	0.407587	Pphln1	periphilin 1
ML	ENSMUSG00000047084	0.529542	0.128645	0.640948	0.00810089	0.104276	0.0205907	0.412944	Ngrn	neugrin, neurite outgrowth associated
ML	ENSMUSG00000030677	0.680414	0.0263802	0.448756	0.00816862	0.104575	0.04329	0.47683	Kif22	kinesin family member 22
ML	ENSMUSG00000030870	0.18779	0.17561	0.68976	0.00824411	0.104753	0.0415081	0.472403	Ubfd1	ubiquitin family domain containing 1
ML	ENSMUSG00000017861	1.01051	0.0266771	0.451245	0.00824491	0.104753	0.048801	0.490885	Mybl2	myeloblastosis oncogene-like 2
ML	ENSMUSG00000024764	0.386734	0.0498776	0.525281	0.0082857	0.104796	0.0302858	0.445172	Naa40	N(alpha)-acetyltransferase 40, NatD catalytic subunit, homolog (S. cerevisiae)
ML	ENSMUSG00000025241	0.201148	0.420754	0.844223	0.00828578	0.104796	0.0338238	0.457281	Fyco1	FYVE and coiled-coil domain containing 1
ML	ENSMUSG00000003308	0.171065	0.270162	0.759994	0.00836658	0.105031	0.0378585	0.46283	Keap1	kelch-like ECH-associated protein 1
ML	ENSMUSG00000004567	0.39465	0.0259761	0.448756	0.00838379	0.105087	0.0292004	0.439644	Mcoln1	mucolipin 1
ML	ENSMUSG00000001280	0.110092	0.488683	0.869797	0.00838585	0.105087	0.033805	0.457281	Sp1	trans-acting transcription factor 1
ML	ENSMUSG00000031328	0.261642	0.167256	0.680848	0.0083897	0.105087	0.0301335	0.444554	Flna	filamin, alpha
ML	ENSMUSG00000015126	0.404911	0.0240475	0.44145	0.00839538	0.105089	0.0499883	0.492487	Tsr3	TSR3 20S rRNA accumulation
ML	ENSMUSG00000052395	0.469217	0.0407355	0.498895	0.00847158	0.105406	0.0355519	0.459522	Rft1	RFT1 homolog (S. cerevisiae)
ML	ENSMUSG00000026784	0.56292	0.0181308	0.414218	0.00851086	0.105406	0.0259225	0.425715	Pdss1	prenyl (solanesyl) diphosphate synthase, subunit 1
ML	ENSMUSG00000036561	0.355941	0.0162518	0.401892	0.00862457	0.105933	0.0450157	0.482666	Ppp6r2	protein phosphatase 6, regulatory subunit 2
ML	ENSMUSG00000050240	0.58317	0.0167131	0.402807	0.00863883	0.105975	0.0329541	0.455635	Hic2	hypermethylated in cancer 2
ML	ENSMUSG00000039936	0.582064	0.0331146	0.474828	0.00866635	0.105975	0.0442383	0.480733	Pik3cd	phosphatidylinositol 3-kinase catalytic delta polypeptide
ML	ENSMUSG00000030403	0.246191	0.0761914	0.567387	0.00869796	0.105975	0.0450073	0.482666	Vasp	vasodilator-stimulated phosphoprotein
ML	ENSMUSG00000032218	0.651852	0.0543978	0.533198	0.00877298	0.106138	0.049413	0.491964	Ccnb2	cyclin B2
ML	ENSMUSG00000035337	0.456277	0.0157289	0.398945	0.00878418	0.106138	0.0336265	0.457156	Uchl4	ubiquitin carboxyl-terminal esterase L4
ML	ENSMUSG00000022476	0.347111	0.0396239	0.497272	0.00885324	0.106295	0.0312379	0.449849	Polr3h	polymerase (RNA) III (DNA directed) polypeptide H
ML	ENSMUSG00000040621	0.315492	0.384979	0.825658	0.00886909	0.10635	0.0499865	0.492487	Gemin8	gem (nuclear organelle) associated protein 8
ML	ENSMUSG00000060216	0.434928	0.108811	0.614471	0.00888435	0.106506	0.0394777	0.466229	Arrb2	arrestin, beta 2
ML	ENSMUSG00000038888	0.586232	0.0530654	0.531632	0.00897743	0.106828	0.0240004	0.41803	Ctu1	cytosolic thiouridylase subunit 1 homolog (S. pombe)
ML	ENSMUSG00000056673	0.394812	0.0733112	0.56204	0.0089905	0.106828	0.0256022	0.42332	Kdm5d	lysine (K)-specific demethylase 5D
ML	ENSMUSG00000038976	0.320096	0.0187649	0.417759	0.00904673	0.106951	0.0448097	0.482666	Ppp1r9b	protein phosphatase 1, regulatory subunit 9B
ML	ENSMUSG00000032583	0.245611	0.0650916	0.547604	0.00911166	0.107312	0.019252	0.407587	Mon1a	MON1 homolog A (yeast)
ML	ENSMUSG00000005378	0.444919	0.0188218	0.417759	0.00912284	0.107363	0.0249756	0.420525	Wbscr22	Williams Beuren syndrome chromosome region 22
ML	ENSMUSG00000061607	0.384831	0.0429278	0.505669	0.00918558	0.107571	0.02473	0.419542	Mdc1	mediator of DNA damage checkpoint 1
ML	ENSMUSG00000030752	0.476813	0.0868705	0.584427	0.00919514	0.107582	0.0287216	0.437135	Kdm8	lysine (K)-specific demethylase 8
ML	ENSMUSG00000025574	0.670902	0.0310619	0.466737	0.00921758	0.10761	0.0432001	0.476335	Tk1	thymidine kinase 1
ML	ENSMUSG00000031148	0.410318	0.141783	0.656272	0.00934149	0.108441	0.0239582	0.41803	Gpkow	G patch domain and KOW motifs
ML	ENSMUSG00000003200	0.163433	0.0205048	0.42811	0.00936344	0.108589	0.0296668	0.442346	Sh3gl1	SH3-domain GRB2-like 1
ML	ENSMUSG00000004880	0.2606	0.175068	0.689073	0.00944811	0.109032	0.0486033	0.490157	Lbr	lamin B receptor
ML	ENSMUSG00000025227	0.778646	0.021984	0.43121	0.00945709	0.109059	0.028413	0.435998	Tmem180	transmembrane protein 180
ML	ENSMUSG00000033114	0.460127	0.0554233	0.536572	0.00945745	0.109059	0.0339911	0.457281	Slc35d2	solute carrier family 35, member D2
ML	ENSMUSG00000031955	0.417976	0.0356865	0.483332	0.00947088	0.10906	0.0201769	0.41016	Bcar1	breast cancer anti-estrogen resistance 1
ML	ENSMUSG00000020831	0.29549	0.0586935	0.540783	0.00948964	0.10906	0.0249218	0.420394	0610010K14Rik	RIKEN cDNA 0610010K14 gene
ML	ENSMUSG00000030074	0.483703	0.275245	0.764348	0.00955763	0.109227	0.0433638	0.477011	Gxylt2	glucoside xylosyltransferase 2
ML	ENSMUSG00000012114	0.130726	0.0369216	0.4877	0.0095861	0.109281	0.0495494	0.491964	Med15	mediator complex subunit 15
ML	ENSMUSG00000029416	0.293787	0.291888	0.773571	0.00961007	0.109434	0.0249449	0.42048	Slc15a4	solute carrier family 15, member 4
ML	ENSMUSG00000037896	0.161925	0.443373	0.853213	0.00976183	0.110161	0.0261733	0.427026	Rcor1	REST corepressor 1
ML	ENSMUSG00000038860	0.734905	0.0246935	0.442855	0.00980699	0.110357	0.027012	0.431738	Garnl3	GTPase activating RANGAP domain-like 3
ML	ENSMUSG00000042460	0.569384	0.0218294	0.430013	0.00981049	0.110365	0.0493231	0.491964	C1galt1	core 1 synthase, glycoprotein-N-acetylgalactosamine 3-beta-galactosyltransferase, 1
ML	ENSMUSG00000029528	0.419535	0.0739125	0.563821	0.00986738	0.110634	0.0493165	0.491964	Pxn	paxillin
ML	ENSMUSG00000041879	0.215812	0.21662	0.726271	0.00987223	0.110641	0.0485885	0.490157	Ipo9	importin 9
ML	ENSMUSG00000061136	0.118995	0.0330848	0.474828	0.00992472	0.1108	0.0329606	0.455635	Prpf40a	PRP40 pre-mRNA processing factor 40 homolog A (yeast)
ML	ENSMUSG00000027822	-0.598861	1.07816e-06	0.025307	5.06746e-07	0.00475784	1.49044e-05	0.116614	Slc33a1	solute carrier family 33 (acetyl-CoA transporter), member 1
ML	ENSMUSG00000040242	-0.855938	7.84083e-05	0.13423	2.50796e-06	0.0122897	6.03726e-05	0.182564	Fgfr1op2	FGFR1 oncogene partner 2
ML	ENSMUSG00000020265	-0.49711	2.17736e-05	0.0984592	1.12274e-05	0.0214423	0.000360685	0.231034	Sumo3	small ubiquitin-like modifier 3
ML	ENSMUSG00000020088	-0.194025	0.0304659	0.464564	2.64063e-05	0.0275477	0.000140483	0.231034	Sar1a	SAR1 gene homolog A (S. cerevisiae)
ML	ENSMUSG00000090262	-0.873022	0.00010049	0.13423	3.02249e-05	0.0283573	0.000212545	0.231034
ML	ENSMUSG00000023068	-0.367203	0.0123039	0.375164	3.65938e-05	0.0286316	0.000199705	0.231034	Nus1	nuclear undecaprenyl pyrophosphate synthase 1 homolog (S. cerevisiae)
ML	ENSMUSG00000028692	-0.586369	0.0835201	0.579242	3.92239e-05	0.0287501	0.000305327	0.231034	Akr1a1	aldo-keto reductase family 1, member A1 (aldehyde reductase)
ML	ENSMUSG00000027253	-1.53155	0.00138529	0.246336	4.05629e-05	0.0287501	0.000849602	0.254225	Lrp4	low density lipoprotein receptor-related protein 4
ML	ENSMUSG00000007812	-0.291331	0.167411	0.680973	4.10322e-05	0.0287501	0.0002929	0.231034	Zfp655	zinc finger protein 655
ML	ENSMUSG00000051391	-0.456874	0.000379919	0.180154	5.43342e-05	0.0317868	0.00143645	0.272256	Ywhag	tyrosine 3-monooxygenase/tryptophan 5-monooxygenase activation protein, gamma polypeptide
ML	ENSMUSG00000035078	-0.853482	0.000145636	0.148685	5.51187e-05	0.0317868	0.00106397	0.257482	Mtmr9	myotubularin related protein 9
ML	ENSMUSG00000049119	-1.07667	0.00478396	0.320172	6.15683e-05	0.0317868	0.000259317	0.231034	Fam110b	family with sequence similarity 110, member B
ML	ENSMUSG00000002396	-0.689614	0.00358106	0.298946	6.32647e-05	0.031935	0.000427856	0.231034	Ocel1	occludin/ELL domain containing 1
ML	ENSMUSG00000027665	-0.679818	9.09537e-05	0.13423	8.66951e-05	0.0324455	0.000502181	0.231132	Pik3ca	phosphatidylinositol 3-kinase, catalytic, alpha polypeptide
ML	ENSMUSG00000001687	-0.543736	0.000591174	0.205262	9.12149e-05	0.0324455	0.00158698	0.276893	Ubl3	ubiquitin-like 3
ML	ENSMUSG00000038633	-0.521017	0.00226339	0.276746	9.19214e-05	0.0324455	0.000684105	0.240795	Degs1	degenerative spermatocyte homolog 1 (Drosophila)
ML	ENSMUSG00000048756	-0.603482	0.00117098	0.236654	9.5879e-05	0.0324457	0.00212662	0.302102	Foxo3	forkhead box O3
ML	ENSMUSG00000068917	-0.325863	0.00568759	0.323851	0.000113546	0.0339017	0.000855352	0.254225	Clk2	CDC-like kinase 2
ML	ENSMUSG00000031422	-0.192506	0.203259	0.716787	0.000118434	0.0339017	0.000488685	0.231132	Morf4l2	mortality factor 4 like 2
ML	ENSMUSG00000021477	-1.12978	0.000725268	0.213538	0.000139342	0.0342316	0.000851906	0.254225	Ctsl	cathepsin L
ML	ENSMUSG00000031728	-0.621417	0.000365553	0.180154	0.000142567	0.0342316	0.000950527	0.254937	Zfp821	zinc finger protein 821
ML	ENSMUSG00000056121	-0.558245	0.0027491	0.286941	0.000160493	0.0350996	0.00145268	0.272256	Fez2	fasciculation and elongation protein zeta 2 (zygin II)
ML	ENSMUSG00000028476	-0.84985	0.000524581	0.194582	0.000165087	0.0353881	0.00640137	0.345056	Reck	reversion-inducing-cysteine-rich protein with kazal motifs
ML	ENSMUSG00000030127	-0.219764	0.0438729	0.509427	0.00017416	0.0361768	0.00114631	0.257482	Cops7a	COP9 (constitutive photomorphogenic) homolog, subunit 7a (Arabidopsis thaliana)
ML	ENSMUSG00000017843	-0.567058	0.000374263	0.180154	0.000184279	0.0368413	0.00336274	0.318607	Ppp2r5c	protein phosphatase 2, regulatory subunit B', gamma
ML	ENSMUSG00000049097	-0.727881	0.120448	0.629585	0.000194751	0.0369805	0.00106918	0.257482	Ankrd34a	ankyrin repeat domain 34A
ML	ENSMUSG00000068732	-0.512129	0.000732338	0.213538	0.000199015	0.0369805	0.00077309	0.253795	Tmem167b	transmembrane protein 167B
ML	ENSMUSG00000024620	-0.535655	0.00339456	0.295655	0.000204526	0.0369805	0.00365818	0.322742	Pdgfrb	platelet derived growth factor receptor, beta polypeptide
ML	ENSMUSG00000037791	-0.200397	0.0366035	0.485956	0.00020635	0.0369805	0.00139183	0.272256	Phf12	PHD finger protein 12
ML	ENSMUSG00000023353	-0.460045	0.000623197	0.205262	0.000208776	0.0370322	0.00116815	0.257571	Agap3	ArfGAP with GTPase domain, ankyrin repeat and PH domain 3
ML	ENSMUSG00000032913	-0.625333	0.00038502	0.180748	0.000226218	0.0377928	0.0045154	0.331599	Lrig2	leucine-rich repeats and immunoglobulin-like domains 2
ML	ENSMUSG00000003458	-0.449467	0.00191241	0.27182	0.000240557	0.0382654	0.0107024	0.363549	Ncstn	nicastrin
ML	ENSMUSG00000042182	-1.03931	0.00109175	0.232885	0.000240591	0.0382654	0.00503413	0.331599	Bend6	BEN domain containing 6
ML	ENSMUSG00000032388	-0.473761	0.00294488	0.291031	0.000243406	0.0382654	0.00121494	0.26163	Spg21	spastic paraplegia 21 homolog (human)
ML	ENSMUSG00000047213	-0.341076	0.00651142	0.331155	0.000263943	0.03919	0.00192494	0.300753	Ythdf3	YTH domain family 3
ML	ENSMUSG00000025544	-0.301273	0.000366029	0.180154	0.000282723	0.0398411	0.0143457	0.385941	Tm9sf2	transmembrane 9 superfamily member 2
ML	ENSMUSG00000026586	-0.784258	0.00594589	0.328585	0.000292214	0.0399702	0.00580521	0.339387	Prrx1	paired related homeobox 1
ML	ENSMUSG00000022559	-0.12446	0.456697	0.859074	0.000298698	0.0402942	0.0014483	0.272256	Fbxl6	F-box and leucine-rich repeat protein 6
ML	ENSMUSG00000015759	-0.26646	0.197784	0.712857	0.000303684	0.040401	0.00159118	0.276893	Cnih1	cornichon homolog 1 (Drosophila)
ML	ENSMUSG00000020029	-0.887047	0.000426917	0.188773	0.000318289	0.0411772	0.00146336	0.272256	Nudt4	nudix (nucleoside diphosphate linked moiety X)-type motif 4
ML	ENSMUSG00000029287	-1.66748	0.00160082	0.25914	0.000321931	0.0411913	0.00400526	0.322742	Tgfbr3	transforming growth factor, beta receptor III
ML	ENSMUSG00000018425	-0.311944	0.00150718	0.255972	0.000329535	0.0415861	0.00743958	0.351655	Dhx40	DEAH (Asp-Glu-Ala-His) box polypeptide 40
ML	ENSMUSG00000013833	-0.399003	0.00434666	0.311387	0.000341071	0.0421357	0.00398853	0.322742	Med16	mediator complex subunit 16
ML	ENSMUSG00000074622	-1.15673	0.00150028	0.255972	0.000375604	0.0436404	0.00400157	0.322742	Mafb	v-maf musculoaponeurotic fibrosarcoma oncogene family, protein B (avian)
ML	ENSMUSG00000021748	-0.301747	0.000865669	0.220863	0.000384729	0.0436404	0.00110423	0.257482	Pdhb	pyruvate dehydrogenase (lipoamide) beta
ML	ENSMUSG00000059363	-0.461418	0.0186807	0.417403	0.000396634	0.0436404	0.00320025	0.315622	Fxn	frataxin
ML	ENSMUSG00000006527	-0.535613	0.00105398	0.232885	0.00039986	0.0436404	0.0125238	0.372856	Sfmbt1	Scm-like with four mbt domains 1
ML	ENSMUSG00000031622	-0.357513	0.0514813	0.527684	0.000407324	0.0436404	0.00283569	0.31317	Sin3b	transcriptional regulator, SIN3B (yeast)
ML	ENSMUSG00000027782	-0.418347	0.00353073	0.298946	0.000425308	0.0442707	0.00406212	0.322742	Kpna4	karyopherin (importin) alpha 4
ML	ENSMUSG00000024050	-0.198514	0.00245421	0.285196	0.000449308	0.0451666	0.00139567	0.272256	Wiz	widely-interspaced zinc finger motifs
ML	ENSMUSG00000020720	-0.222466	0.0610565	0.543142	0.000453813	0.0452197	0.00244861	0.305719	Psmd12	proteasome (prosome, macropain) 26S subunit, non-ATPase, 12
ML	ENSMUSG00000026457	-0.258294	0.0112421	0.367606	0.000464803	0.0455934	0.00528412	0.333059	Adipor1	adiponectin receptor 1
ML	ENSMUSG00000019143	-0.332721	0.00241854	0.284557	0.000474731	0.0460459	0.0140174	0.381777	Hars2	histidyl-tRNA synthetase 2, mitochondrial (putative)
ML	ENSMUSG00000030314	-0.440944	0.00510147	0.320172	0.000476029	0.0460767	0.00205734	0.302102	Atg7	autophagy related 7
ML	ENSMUSG00000021770	-0.525001	0.00199863	0.272301	0.000479653	0.0463319	0.00254594	0.308039	Samd8	sterile alpha motif domain containing 8
ML	ENSMUSG00000006299	-0.151232	0.195	0.710488	0.00048072	0.046336	0.0040348	0.322742	Aamp	angio-associated migratory protein
ML	ENSMUSG00000030245	-0.316274	0.0990864	0.603033	0.000483921	0.046336	0.00247596	0.308039	Golt1b	golgi transport 1 homolog B (S. cerevisiae)
ML	ENSMUSG00000021186	-1.10404	0.00240818	0.284291	0.000488191	0.046336	0.00325512	0.317742	Fbln5	fibulin 5
ML	ENSMUSG00000024068	-0.393012	0.0325897	0.473696	0.000497647	0.046336	0.00649828	0.345214	Spast	spastin
ML	ENSMUSG00000002458	-0.641862	0.00178268	0.269092	0.000498449	0.046336	0.00226241	0.303173	Rgs19	regulator of G-protein signaling 19
ML	ENSMUSG00000058594	-0.56472	0.00205403	0.272301	0.000500843	0.0464666	0.00274286	0.311751	Fbxo18	F-box protein 18
ML	ENSMUSG00000048897	-0.485688	0.0026966	0.286941	0.000508741	0.0469633	0.00318798	0.315622	Zfp710	zinc finger protein 710
ML	ENSMUSG00000036580	-0.416384	0.00417489	0.310905	0.000511801	0.0470186	0.00376544	0.322742	Spg20	spastic paraplegia 20, spartin (Troyer syndrome) homolog (human)
ML	ENSMUSG00000044340	-0.517297	0.263194	0.755401	0.000516962	0.0471008	0.0062128	0.345056	Phlpp1	PH domain and leucine rich repeat protein phosphatase 1
ML	ENSMUSG00000021102	-0.273519	0.00312875	0.292544	0.000541476	0.0480522	0.0015737	0.276893	Glrx5	glutaredoxin 5 homolog (S. cerevisiae)
ML	ENSMUSG00000028469	-0.943004	0.00111586	0.232885	0.00056551	0.0484406	0.0114153	0.366297	Npr2	natriuretic peptide receptor 2
ML	ENSMUSG00000061455	-0.676715	0.0040658	0.310646	0.000570239	0.0484406	0.00313769	0.314657	Stx17	syntaxin 17
ML	ENSMUSG00000038520	-0.241684	0.0400136	0.497536	0.000574155	0.0484881	0.00395027	0.322742	Tbc1d17	TBC1 domain family, member 17
ML	ENSMUSG00000024253	-0.804676	0.000790663	0.215408	0.000580344	0.0487375	0.00187861	0.297613	Dync2li1	dynein cytoplasmic 2 light intermediate chain 1
ML	ENSMUSG00000001157	-0.686745	0.000690724	0.211058	0.000609443	0.0496706	0.00510869	0.331899	Gmcl1	germ cell-less homolog 1 (Drosophila)
ML	ENSMUSG00000017686	-0.228453	0.00435761	0.311387	0.000629399	0.0503064	0.0133699	0.379244	Rhot1	ras homolog gene family, member T1
ML	ENSMUSG00000027303	-0.353797	0.00358142	0.298946	0.000638772	0.0505685	0.00292562	0.31317	Ptpra	protein tyrosine phosphatase, receptor type, A
ML	ENSMUSG00000006281	-0.702486	0.00705607	0.335342	0.000653897	0.0509714	0.00708403	0.349315	Tep1	telomerase associated protein 1
ML	ENSMUSG00000028223	-0.367573	0.0328899	0.474666	0.000704928	0.0515319	0.00546366	0.335722	Decr1	2,4-dienoyl CoA reductase 1, mitochondrial
ML	ENSMUSG00000002781	-0.353465	0.160244	0.674436	0.000718488	0.0516027	0.00455122	0.331599	Tmem143	transmembrane protein 143
ML	ENSMUSG00000047843	-0.487762	0.00331425	0.295166	0.000731178	0.0518259	0.00490855	0.331599	Bri3	brain protein I3
ML	ENSMUSG00000021431	-0.519012	0.00159032	0.259016	0.000793511	0.0530227	0.0195942	0.409137	Snrnp48	small nuclear ribonucleoprotein 48 (U11/U12)
ML	ENSMUSG00000074971	-1.38446	0.00229722	0.277247	0.000803865	0.0533015	0.0167745	0.395245	Fibin	fin bud initiation factor homolog (zebrafish)
ML	ENSMUSG00000042104	-0.676859	0.00260024	0.286941	0.000818439	0.0534638	0.00469153	0.331599	Uggt2	UDP-glucose glycoprotein glucosyltransferase 2
ML	ENSMUSG00000042508	-0.336986	0.0384846	0.49201	0.000819921	0.0534638	0.00629689	0.345056	Dmtf1	cyclin D binding myb-like transcription factor 1
ML	ENSMUSG00000067377	-0.543884	0.00982819	0.356925	0.000836187	0.054042	0.0120582	0.370843	Tspan6	tetraspanin 6
ML	ENSMUSG00000033352	-0.387228	0.0025751	0.286941	0.000841278	0.054042	0.00370784	0.322742	Map2k4	mitogen-activated protein kinase kinase 4
ML	ENSMUSG00000025103	-0.699134	0.0012744	0.239306	0.000869781	0.0542256	0.0102628	0.360937	Btbd1	BTB (POZ) domain containing 1
ML	ENSMUSG00000024940	-0.517997	0.0175833	0.409855	0.000913397	0.0551149	0.0208254	0.413369	Ltbp3	latent transforming growth factor beta binding protein 3
ML	ENSMUSG00000055239	-0.183038	0.052018	0.528797	0.000927141	0.0553332	0.00295399	0.313744	Kcmf1	potassium channel modulatory factor 1
ML	ENSMUSG00000033739	-0.907322	0.0294924	0.463516	0.000937755	0.0553747	0.00458618	0.331599	Fkbpl	FK506 binding protein-like
ML	ENSMUSG00000030254	-0.765439	0.00580769	0.32602	0.000957013	0.0556899	0.0116551	0.367955	Rad18	RAD18 E3 ubiquitin protein ligase
ML	ENSMUSG00000027243	-0.503711	0.0019597	0.27182	0.00096285	0.0556899	0.0265498	0.429727	Harbi1	harbinger transposase derived 1
ML	ENSMUSG00000020097	-0.424413	0.219991	0.728175	0.000989891	0.0562393	0.00455343	0.331599	Sgpl1	sphingosine phosphate lyase 1
ML	ENSMUSG00000055013	-0.585581	0.0140865	0.387834	0.00100807	0.0566072	0.00326258	0.317742	Agap1	ArfGAP with GTPase domain, ankyrin repeat and PH domain 1
ML	ENSMUSG00000019877	-0.239078	0.00696074	0.335342	0.00101479	0.0567135	0.0484585	0.490157	Serinc1	serine incorporator 1
ML	ENSMUSG00000020962	-0.281964	0.00191846	0.27182	0.00103938	0.0568144	0.0075598	0.352572	Gtf2a1	general transcription factor II A, 1
ML	ENSMUSG00000054604	-0.390362	0.00365734	0.299108	0.00104443	0.0568144	0.00551339	0.335796	Cggbp1	CGG triplet repeat binding protein 1
ML	ENSMUSG00000025742	-0.651539	0.0390726	0.494677	0.00105905	0.0568847	0.0122972	0.371488	Prps2	phosphoribosyl pyrophosphate synthetase 2
ML	ENSMUSG00000038582	-0.39639	0.0211984	0.429869	0.00107481	0.0571679	0.00601747	0.341172	Pptc7	PTC7 protein phosphatase homolog (S. cerevisiae)
ML	ENSMUSG00000022787	-0.351578	0.00757982	0.338247	0.00109253	0.0573181	0.0130751	0.376803	Wdr53	WD repeat domain 53
ML	ENSMUSG00000064030	-0.321186	0.0623272	0.544143	0.00109491	0.0573667	0.0161796	0.390536	Wibg	within bgcn homolog (Drosophila)
ML	ENSMUSG00000020390	-0.204794	0.0192784	0.419382	0.00111191	0.0576434	0.00336891	0.318607	Ube2b	ubiquitin-conjugating enzyme E2B
ML	ENSMUSG00000029462	-0.259567	0.118787	0.628122	0.00112562	0.0576434	0.00453075	0.331599	Vps29	vacuolar protein sorting 29 (S. pombe)
ML	ENSMUSG00000022139	-0.561675	0.0264519	0.449271	0.00112709	0.0576434	0.0279598	0.435425	Mbnl2	muscleblind-like 2
ML	ENSMUSG00000025586	-0.501344	0.336914	0.798666	0.00114623	0.0583103	0.00845933	0.35606	Cpeb1	cytoplasmic polyadenylation element binding protein 1
ML	ENSMUSG00000033933	-0.424405	0.00529721	0.321704	0.0011477	0.0583103	0.010333	0.361656	Vhl	von Hippel-Lindau tumor suppressor
ML	ENSMUSG00000047824	-0.234609	0.103837	0.609179	0.00117552	0.0583459	0.00415074	0.323682	Pygo2	pygopus 2
ML	ENSMUSG00000027479	-0.230516	0.0218585	0.430013	0.00117851	0.0583843	0.00659548	0.345581	Mapre1	microtubule-associated protein, RP/EB family, member 1
ML	ENSMUSG00000005687	-0.280342	0.153796	0.668838	0.00118352	0.0583843	0.00408811	0.322742	Bcas2	breast carcinoma amplified sequence 2
ML	ENSMUSG00000062397	-0.314939	0.0109324	0.366459	0.00119517	0.0585295	0.00337305	0.318607	Zfp706	zinc finger protein 706
ML	ENSMUSG00000061410	-0.420354	0.00381611	0.302614	0.00120086	0.0585295	0.0228905	0.41667	Zcchc14	zinc finger, CCHC domain containing 14
ML	ENSMUSG00000020198	-0.248585	0.00286938	0.288351	0.00122111	0.0585295	0.00381632	0.322742	Ap3d1	adaptor-related protein complex 3, delta 1 subunit
ML	ENSMUSG00000038332	-0.513948	0.0214709	0.429987	0.00122778	0.0585486	0.0303843	0.446165	Sesn1	sestrin 1
ML	ENSMUSG00000021891	-0.518775	0.016359	0.402181	0.00124172	0.0588218	0.0134108	0.379892	Mettl6	methyltransferase like 6
ML	ENSMUSG00000008398	-0.493104	0.196944	0.712104	0.0012435	0.0588469	0.00550087	0.335796	Elk3	ELK3, member of ETS oncogene family
ML	ENSMUSG00000052837	-0.435846	0.00654197	0.331155	0.00126535	0.0589938	0.0200489	0.410067	Junb	jun B proto-oncogene
ML	ENSMUSG00000040997	-0.518672	0.0143562	0.391151	0.00127021	0.0589938	0.0073037	0.350865	Abhd4	abhydrolase domain containing 4
ML	ENSMUSG00000028683	-0.312844	0.00751917	0.338247	0.00128145	0.0589938	0.0208531	0.413369	Eif2b3	eukaryotic translation initiation factor 2B, subunit 3
ML	ENSMUSG00000036904	-1.22249	0.00814814	0.346248	0.00129478	0.0590617	0.00699483	0.348758	Fzd8	frizzled homolog 8 (Drosophila)
ML	ENSMUSG00000038042	-0.367507	0.175462	0.689582	0.00129962	0.0590617	0.00605354	0.341567	Ptpdc1	protein tyrosine phosphatase domain containing 1
ML	ENSMUSG00000029535	-0.450295	0.00590045	0.328195	0.00131306	0.0592138	0.00481125	0.331599	Triap1	TP53 regulated inhibitor of apoptosis 1
ML	ENSMUSG00000046546	-0.960387	0.00441722	0.312299	0.00133413	0.0597018	0.0228993	0.41667	Fam43a	family with sequence similarity 43, member A
ML	ENSMUSG00000034473	-0.557415	0.00316789	0.292544	0.00134819	0.0599928	0.0193556	0.407587	Sec22a	SEC22 vesicle trafficking protein homolog A (S. cerevisiae)
ML	ENSMUSG00000030965	-0.264768	0.00772083	0.340333	0.00136276	0.0600933	0.0302524	0.445071	Fam175b	family with sequence similarity 175, member B
ML	ENSMUSG00000037822	-0.670047	0.00256313	0.286941	0.00136349	0.0600933	0.00497368	0.331599	Smim14	small integral membrane protein 14
ML	ENSMUSG00000040234	-0.898342	0.00575999	0.325923	0.00138732	0.0603278	0.00392672	0.322742	Tm7sf3	transmembrane 7 superfamily member 3
ML	ENSMUSG00000066151	-0.254941	0.00744225	0.338145	0.00139363	0.0603588	0.00963248	0.357379	Fkbp15	FK506 binding protein 15
ML	ENSMUSG00000029634	-0.945534	0.00167437	0.264523	0.00140265	0.0603588	0.00723818	0.350865	Rnf6	ring finger protein (C3H2C3 type) 6
ML	ENSMUSG00000052102	-0.594875	0.00374488	0.300352	0.00140541	0.0603588	0.00805968	0.354603	Gnpda1	glucosamine-6-phosphate deaminase 1
ML	ENSMUSG00000078941	-0.337806	0.124844	0.635186	0.00140996	0.0603588	0.00817798	0.356022	Ak6	adenylate kinase 6
ML	ENSMUSG00000016921	-0.234062	0.00418364	0.310905	0.00141563	0.0603588	0.00964643	0.357379	Srsf6	serine/arginine-rich splicing factor 6
ML	ENSMUSG00000020284	-0.330681	0.00808343	0.345607	0.00141838	0.0603588	0.00627267	0.345056	1810043G02Rik	RIKEN cDNA 1810043G02 gene
ML	ENSMUSG00000041417	-1.05313	0.00856369	0.35167	0.00143541	0.060479	0.0268903	0.431256	Pik3r1	phosphatidylinositol 3-kinase, regulatory subunit, polypeptide 1 (p85 alpha)
ML	ENSMUSG00000002881	-0.412199	0.164861	0.678336	0.00144808	0.0606966	0.0070352	0.348758	Nab1	Ngfi-A binding protein 1
ML	ENSMUSG00000028646	-0.333568	0.0325195	0.473667	0.00153538	0.0617943	0.00873381	0.35622	Rragc	Ras-related GTP binding C
ML	ENSMUSG00000030612	-0.249219	0.208107	0.720699	0.00156944	0.0623665	0.0277698	0.43412	Mrpl46	mitochondrial ribosomal protein L46
ML	ENSMUSG00000041120	-0.741993	0.0185134	0.416777	0.0015747	0.0624681	0.0108541	0.363797	Nbl1	neuroblastoma, suppression of tumorigenicity 1
ML	ENSMUSG00000003545	-0.907618	0.00414167	0.310905	0.00158402	0.0624888	0.00903514	0.357379	Fosb	FBJ osteosarcoma oncogene B
ML	ENSMUSG00000003032	-0.898772	0.00412067	0.310905	0.00159518	0.0626299	0.00823883	0.356022	Klf4	Kruppel-like factor 4 (gut)
ML	ENSMUSG00000032026	-0.26939	0.223439	0.730844	0.0015956	0.0626299	0.00877067	0.356793	Rexo2	REX2, RNA exonuclease 2 homolog (S. cerevisiae)
ML	ENSMUSG00000032492	-2.13952	0.00131571	0.244567	0.0016146	0.0627994	0.00447346	0.330719	Pth1r	parathyroid hormone 1 receptor
ML	ENSMUSG00000027746	-0.475624	0.0049598	0.320172	0.00163042	0.0629306	0.00860136	0.35606	Ufm1	ubiquitin-fold modifier 1
ML	ENSMUSG00000062203	-0.321489	0.00353742	0.298946	0.00164222	0.0629306	0.00967454	0.357379	Gspt1	G1 to S phase transition 1
ML	ENSMUSG00000021134	-0.219635	0.311189	0.785304	0.00164326	0.0629306	0.00640459	0.345056	Srsf5	serine/arginine-rich splicing factor 5
ML	ENSMUSG00000027286	-0.281128	0.136627	0.65044	0.00164819	0.0629306	0.0102643	0.360937	Lrrc57	leucine rich repeat containing 57
ML	ENSMUSG00000020280	-0.404934	0.0230374	0.436299	0.00164964	0.0629306	0.00515414	0.332188	Pus10	pseudouridylate synthase 10
ML	ENSMUSG00000027010	-0.425303	0.00490044	0.320172	0.00164998	0.0629306	0.00464674	0.331599	Slc25a12	solute carrier family 25 (mitochondrial carrier, Aralar), member 12
ML	ENSMUSG00000043391	-0.802869	0.00629894	0.329267	0.00167778	0.063386	0.0114371	0.366405	2510009E07Rik	RIKEN cDNA 2510009E07 gene
ML	ENSMUSG00000035572	-0.451997	0.00221921	0.276625	0.00168096	0.063386	0.00537304	0.3346	Dcaf10	DDB1 and CUL4 associated factor 10
ML	ENSMUSG00000030304	-0.192173	0.0375549	0.489843	0.0017098	0.0639236	0.0230776	0.417729	Ergic2	ERGIC and golgi 2
ML	ENSMUSG00000070808	-0.228853	0.339215	0.800344	0.00173038	0.063978	0.00612664	0.344449	Gltscr1	glioma tumor suppressor candidate region gene 1
ML	ENSMUSG00000036023	-0.460884	0.00414435	0.310905	0.0017467	0.0639872	0.0158977	0.389542	Parp2	poly (ADP-ribose) polymerase family, member 2
ML	ENSMUSG00000049090	-0.511417	0.00832084	0.348501	0.00175319	0.0639872	0.0286385	0.437135	Zadh2	zinc binding alcohol dehydrogenase, domain containing 2
ML	ENSMUSG00000021116	-0.153767	0.280227	0.76736	0.00180109	0.0644946	0.00760527	0.352572	Eif2s1	eukaryotic translation initiation factor 2, subunit 1 alpha
ML	ENSMUSG00000015837	-0.416302	0.00244287	0.285196	0.00180612	0.0645309	0.00761455	0.352572	Sqstm1	sequestosome 1
ML	ENSMUSG00000029994	-0.592719	0.00821792	0.347209	0.00181625	0.0645718	0.0256883	0.423572	Anxa4	annexin A4
ML	ENSMUSG00000021096	-0.539018	0.00624839	0.329267	0.00182547	0.0646573	0.00703076	0.348758	Ppm1a	protein phosphatase 1A, magnesium dependent, alpha isoform
ML	ENSMUSG00000054387	-0.622186	0.00957897	0.356244	0.00186392	0.0650931	0.00830108	0.35606	Mdm4	transformed mouse 3T3 cell double minute 4
ML	ENSMUSG00000056515	-0.534566	0.014993	0.39579	0.00186425	0.0650931	0.0110447	0.363797	Rab31	RAB31, member RAS oncogene family
ML	ENSMUSG00000024713	-1.16851	0.00638383	0.330054	0.00188282	0.0652318	0.00932866	0.357379	Pcsk5	proprotein convertase subtilisin/kexin type 5
ML	ENSMUSG00000028161	-0.359771	0.0601374	0.542264	0.00188703	0.0652599	0.0243337	0.418447	Ppp3ca	protein phosphatase 3, catalytic subunit, alpha isoform
ML	ENSMUSG00000028617	-0.448469	0.00154729	0.256669	0.00192191	0.0658091	0.0205517	0.412837	Lrrc42	leucine rich repeat containing 42
ML	ENSMUSG00000041685	-0.608104	0.00271448	0.286941	0.00194398	0.066217	0.00759363	0.352572	Fcho2	FCH domain only 2
ML	ENSMUSG00000029142	-0.223099	0.443214	0.853068	0.00194695	0.066217	0.00539437	0.334641
ML	ENSMUSG00000017291	-0.377353	0.0228207	0.436196	0.00197444	0.0664076	0.0153924	0.389542	Taok1	TAO kinase 1
ML	ENSMUSG00000043929	-0.363347	0.00968108	0.356671	0.00198315	0.0664994	0.00912999	0.357379	Klhl15	kelch-like 15
ML	ENSMUSG00000033863	-0.724219	0.00701052	0.335342	0.00200794	0.0668967	0.0180128	0.403281	Klf9	Kruppel-like factor 9
ML	ENSMUSG00000020993	-0.349885	0.0332969	0.475836	0.0020235	0.0668967	0.0124248	0.372856	Trappc6b	trafficking protein particle complex 6B
ML	ENSMUSG00000030208	-0.89068	0.0132274	0.383678	0.00204016	0.0672328	0.0173959	0.397961	Emp1	epithelial membrane protein 1
ML	ENSMUSG00000052681	-0.314287	0.0304347	0.464564	0.0020422	0.0672328	0.0139989	0.381777	Rap1b	RAS related protein 1b
ML	ENSMUSG00000031812	-0.415365	0.0527053	0.530708	0.00206762	0.0674995	0.0223292	0.41475	Map1lc3b	microtubule-associated protein 1 light chain 3 beta
ML	ENSMUSG00000026200	-0.670109	0.00745284	0.338145	0.0020806	0.0675942	0.0186676	0.406281	Glb1l	galactosidase, beta 1-like
ML	ENSMUSG00000021669	-0.396341	0.00504945	0.320172	0.0020842	0.0676561	0.0110129	0.363797	Col4a3bp	collagen, type IV, alpha 3 (Goodpasture antigen) binding protein
ML	ENSMUSG00000029649	-0.266759	0.0867351	0.583852	0.00209447	0.0676998	0.00970906	0.357379	Pomp	proteasome maturation protein
ML	ENSMUSG00000026319	-0.29407	0.0205848	0.42811	0.0020981	0.0676998	0.0150378	0.389542	2310035C23Rik	RIKEN cDNA 2310035C23 gene
ML	ENSMUSG00000075467	-0.328643	0.419725	0.843505	0.00212513	0.0680232	0.00532856	0.3339	Dnlz	DNL-type zinc finger
ML	ENSMUSG00000069808	-0.387369	0.010883	0.366272	0.00213277	0.0680238	0.00802618	0.354173	Fam57a	family with sequence similarity 57, member A
ML	ENSMUSG00000031950	-0.279256	0.0140763	0.387834	0.00213384	0.0680238	0.032716	0.454718	Gabarapl2	gamma-aminobutyric acid (GABA) A receptor-associated protein-like 2
ML	ENSMUSG00000044864	-0.904385	0.00360429	0.298946	0.00213624	0.0680238	0.00775736	0.352572	Ankrd50	ankyrin repeat domain 50
ML	ENSMUSG00000034620	-0.286347	0.268563	0.759159	0.00213673	0.0680238	0.00774784	0.352572	Tmem5	transmembrane protein 5
ML	ENSMUSG00000030527	-0.446846	0.00488731	0.320172	0.00217221	0.0680309	0.00973293	0.357379	Crtc3	CREB regulated transcription coactivator 3
ML	ENSMUSG00000036918	-0.54863	0.0133979	0.384368	0.00217231	0.0680309	0.00670083	0.347632	Ttc7	tetratricopeptide repeat domain 7
ML	ENSMUSG00000031479	-0.358037	0.0301043	0.463791	0.00218679	0.0680309	0.00617501	0.345056	Vps36	vacuolar protein sorting 36 (yeast)
ML	ENSMUSG00000015839	-0.316978	0.0120884	0.375164	0.00225044	0.0688775	0.0101773	0.359771	Nfe2l2	nuclear factor, erythroid derived 2, like 2
ML	ENSMUSG00000026349	-0.366603	0.0265012	0.449724	0.00227117	0.0689183	0.010461	0.362163	Ccnt2	cyclin T2
ML	ENSMUSG00000021775	-0.464473	0.0068398	0.334143	0.00230098	0.0694212	0.00860649	0.35606	Nr1d2	nuclear receptor subfamily 1, group D, member 2
ML	ENSMUSG00000060152	-0.42093	0.0155389	0.398945	0.00230308	0.0694399	0.0081922	0.356022	Pop5	processing of precursor 5, ribonuclease P/MRP family (S. cerevisiae)
ML	ENSMUSG00000020530	-0.19034	0.0931604	0.594827	0.00233768	0.069722	0.00963491	0.357379	Ggnbp2	gametogenetin binding protein 2
ML	ENSMUSG00000019843	-0.741675	0.0477067	0.521214	0.00235057	0.0699287	0.0139226	0.381777	Fyn	Fyn proto-oncogene
ML	ENSMUSG00000020883	-0.503648	0.0165556	0.402807	0.00238286	0.070266	0.00728617	0.350865	Fbxl20	F-box and leucine-rich repeat protein 20
ML	ENSMUSG00000039377	-0.71248	0.007044	0.335342	0.00239162	0.0703108	0.0372861	0.46257	Hlx	H2.0-like homeobox
ML	ENSMUSG00000035949	-0.342742	0.00512896	0.320173	0.00243583	0.0708934	0.00777173	0.352572	Fbxw2	F-box and WD-40 domain protein 2
ML	ENSMUSG00000064373	-2.21644	0.010971	0.366832	0.00243736	0.0708934	0.00685468	0.348758	Sepp1	selenoprotein P, plasma, 1
ML	ENSMUSG00000035798	-0.355539	0.0115602	0.368429	0.00245105	0.0709994	0.0340346	0.457281	Zdhhc17	zinc finger, DHHC domain containing 17
ML	ENSMUSG00000021639	-0.345087	0.0488716	0.524097	0.00245475	0.0709994	0.010795	0.363797	Gtf2h2	general transcription factor II H, polypeptide 2
ML	ENSMUSG00000041959	-0.755307	0.00868146	0.351939	0.00246617	0.0709994	0.00676412	0.348171	S100a10	S100 calcium binding protein A10 (calpactin)
ML	ENSMUSG00000038145	-0.603092	0.0114561	0.368125	0.00247165	0.0709994	0.0125592	0.372856	Snrk	SNF related kinase
ML	ENSMUSG00000056666	-0.979679	0.00272473	0.286941	0.00247464	0.0709994	0.00864763	0.35606	Retsat	retinol saturase (all trans retinol 13,14 reductase)
ML	ENSMUSG00000029427	-0.385523	0.00644627	0.331155	0.00250297	0.0713543	0.0224186	0.414852	Zcchc8	zinc finger, CCHC domain containing 8
ML	ENSMUSG00000017707	-0.631481	0.0125443	0.375823	0.00253674	0.0715669	0.00733188	0.350865	Serinc3	serine incorporator 3
ML	ENSMUSG00000020777	-0.720077	0.0155609	0.398945	0.00254205	0.0716482	0.0299951	0.444325	Acox1	acyl-Coenzyme A oxidase 1, palmitoyl
ML	ENSMUSG00000045867	-0.589051	0.012307	0.375164	0.00257867	0.0719713	0.0158586	0.389542	Cradd	CASP2 and RIPK1 domain containing adaptor with death domain
ML	ENSMUSG00000007656	-0.570635	0.00677889	0.332793	0.00258127	0.0720011	0.00631468	0.345056	Arpp19	cAMP-regulated phosphoprotein 19
ML	ENSMUSG00000021395	-0.307836	0.140995	0.655957	0.00260339	0.0724459	0.0115136	0.366405	Spin1	spindlin 1
ML	ENSMUSG00000035268	-1.01402	0.0288757	0.459937	0.00265018	0.072756	0.00813764	0.355751	Pkig	protein kinase inhibitor, gamma
ML	ENSMUSG00000030557	-0.311787	0.0172048	0.407	0.00266446	0.0728203	0.0241015	0.418257	Mef2a	myocyte enhancer factor 2A
ML	ENSMUSG00000000282	-0.341056	0.00426865	0.311387	0.00272252	0.0734112	0.0171082	0.397793	Mnt	max binding protein
ML	ENSMUSG00000005882	-0.384767	0.0122706	0.375164	0.00272746	0.0734952	0.0117504	0.368731	Uqcc1	ubiquinol-cytochrome c reductase complex assembly factor 1
ML	ENSMUSG00000027722	-0.627561	0.020874	0.428756	0.00276355	0.0736292	0.0139719	0.381777	Spata5	spermatogenesis associated 5
ML	ENSMUSG00000027656	-2.0247	0.0105337	0.362847	0.00277756	0.0736844	0.00659581	0.345581	Wisp2	WNT1 inducible signaling pathway protein 2
ML	ENSMUSG00000042167	-0.315144	0.00633317	0.329267	0.00278065	0.0736844	0.0125942	0.372856	Papd4	PAP associated domain containing 4
ML	ENSMUSG00000057236	-0.275053	0.0536759	0.531719	0.00278758	0.0736844	0.00833983	0.35606	Rbbp4	retinoblastoma binding protein 4
ML	ENSMUSG00000026356	-0.151787	0.0186141	0.417307	0.00278759	0.0736844	0.00871154	0.356095	Dars	aspartyl-tRNA synthetase
ML	ENSMUSG00000063550	-0.294007	0.0341981	0.477806	0.00282796	0.0739425	0.0409685	0.469599	Nup98	nucleoporin 98
ML	ENSMUSG00000045973	-0.653275	0.00803961	0.345607	0.00289513	0.074636	0.00814687	0.355772	Slc25a51	solute carrier family 25, member 51
ML	ENSMUSG00000018858	-0.215559	0.182069	0.697164	0.00291163	0.0748968	0.0204701	0.411721	Ict1	immature colon carcinoma transcript 1
ML	ENSMUSG00000034902	-0.261918	0.0638124	0.546257	0.00292917	0.0751421	0.00795333	0.354173	Pip5k1c	phosphatidylinositol-4-phosphate 5-kinase, type 1 gamma
ML	ENSMUSG00000027611	-1.2922	0.0109285	0.366459	0.00294744	0.0753641	0.010268	0.360937	Procr	protein C receptor, endothelial
ML	ENSMUSG00000021453	-0.862472	0.0386374	0.492517	0.00295585	0.0753777	0.0195527	0.409053	Gadd45g	growth arrest and DNA-damage-inducible 45 gamma
ML	ENSMUSG00000020923	-0.295758	0.00871485	0.351939	0.00295651	0.0753777	0.00716987	0.350249	Ubtf	upstream binding transcription factor, RNA polymerase I
ML	ENSMUSG00000029227	-0.374385	0.0094206	0.355301	0.00296001	0.0753777	0.0163465	0.392525	Fip1l1	FIP1 like 1 (S. cerevisiae)
ML	ENSMUSG00000002319	-0.151156	0.433358	0.849047	0.00300675	0.0758474	0.0137467	0.381406	Ipo4	importin 4
ML	ENSMUSG00000028419	-0.15162	0.237594	0.739401	0.0030313	0.076196	0.0144004	0.38608	Chmp5	charged multivesicular body protein 5
ML	ENSMUSG00000017721	-0.265244	0.0287044	0.458655	0.00303843	0.076196	0.0375785	0.46257	Pigt	phosphatidylinositol glycan anchor biosynthesis, class T
ML	ENSMUSG00000024069	-0.197678	0.0977712	0.601458	0.00307227	0.0765133	0.013611	0.380566	Slc30a6	solute carrier family 30 (zinc transporter), member 6
ML	ENSMUSG00000022656	-0.565124	0.00626934	0.329267	0.00311265	0.0769568	0.00711972	0.349985	Pvrl3	poliovirus receptor-related 3
ML	ENSMUSG00000024359	-0.291978	0.110347	0.615453	0.003128	0.0770167	0.0154251	0.389542	Hspa9	heat shock protein 9
ML	ENSMUSG00000030057	-0.229791	0.0103693	0.362141	0.00317679	0.077465	0.00906569	0.357379	Cnbp	cellular nucleic acid binding protein
ML	ENSMUSG00000021619	-0.364415	0.152613	0.66806	0.00318418	0.0775318	0.00842529	0.35606	Atg10	autophagy related 10
ML	ENSMUSG00000036046	-0.614922	0.0110314	0.367178	0.00318618	0.0775372	0.0167756	0.395245	5031439G07Rik	RIKEN cDNA 5031439G07 gene
ML	ENSMUSG00000041975	-0.542773	0.0577129	0.540644	0.00319452	0.0775372	0.0133356	0.37886	Mettl8	methyltransferase like 8
ML	ENSMUSG00000036599	-0.571962	0.00967693	0.356671	0.00324449	0.0779146	0.037462	0.46257	Chst12	carbohydrate sulfotransferase 12
ML	ENSMUSG00000015749	-0.505544	0.00762839	0.33887	0.00326122	0.0782281	0.0159715	0.389542	Anp32e	acidic (leucine-rich) nuclear phosphoprotein 32 family, member E
ML	ENSMUSG00000023348	-0.259922	0.00934768	0.355301	0.00333029	0.0788408	0.0110181	0.363797	Trip6	thyroid hormone receptor interactor 6
ML	ENSMUSG00000035354	-0.352477	0.0230385	0.436299	0.00333146	0.0788408	0.0199194	0.409137	Uvrag	UV radiation resistance associated gene
ML	ENSMUSG00000014402	-0.077487	0.464501	0.86218	0.00333647	0.0788675	0.0192817	0.407587	Tsg101	tumor susceptibility gene 101
ML	ENSMUSG00000024782	-0.333134	0.0997962	0.603284	0.00334116	0.0788987	0.0146233	0.388908	Ak3	adenylate kinase 3
ML	ENSMUSG00000028478	-0.0560763	0.434032	0.849431	0.00339937	0.0794251	0.0140778	0.382745	Clta	clathrin, light polypeptide (Lca)
ML	ENSMUSG00000042390	-0.300706	0.0531846	0.53169	0.00341072	0.0795266	0.0117457	0.368731	Gatad2b	GATA zinc finger domain containing 2B
ML	ENSMUSG00000045822	-0.266032	0.282712	0.768112	0.00346525	0.0800571	0.0199666	0.409137	Zswim3	zinc finger SWIM-type containing 3
ML	ENSMUSG00000001156	-0.517185	0.0167889	0.402943	0.00346945	0.0800753	0.0143419	0.385941	Mxd1	MAX dimerization protein 1
ML	ENSMUSG00000058569	-0.209848	0.0106474	0.364259	0.00350722	0.0802762	0.0115403	0.366405	Tmed9	transmembrane emp24 protein transport domain containing 9
ML	ENSMUSG00000037072	-0.18505	0.0514165	0.527554	0.00352324	0.0804239	0.0203341	0.41057	Sep15	selenoprotein
ML	ENSMUSG00000004317	-0.450406	0.0317065	0.46925	0.00357197	0.0810842	0.0156188	0.389542	Clcn5	chloride channel 5
ML	ENSMUSG00000029478	-0.190314	0.0980649	0.60164	0.0036244	0.081387	0.0127973	0.374658	Ncor2	nuclear receptor co-repressor 2
ML	ENSMUSG00000026436	-0.555119	0.0189325	0.417839	0.00363149	0.0814393	0.0111841	0.364222	Elk4	ELK4, member of ETS oncogene family
ML	ENSMUSG00000069833	-0.40288	0.0146402	0.392735	0.00363715	0.0814393	0.0298412	0.443506	Ahnak	AHNAK nucleoprotein (desmoyokin)
ML	ENSMUSG00000021417	-0.606054	0.0112885	0.367606	0.00364278	0.0814393	0.00954514	0.357379	Eci2	enoyl-Coenzyme A delta isomerase 2
ML	ENSMUSG00000020823	-0.549715	0.0140836	0.387834	0.00364327	0.0814393	0.0328951	0.455571	Sec14l1	SEC14-like 1 (S. cerevisiae)
ML	ENSMUSG00000020801	-0.508972	0.00970249	0.356682	0.00369074	0.0816888	0.0106484	0.363549	Med31	mediator complex subunit 31
ML	ENSMUSG00000028101	-0.305292	0.0389011	0.493453	0.00373418	0.0818758	0.0315016	0.450593	Pias3	protein inhibitor of activated STAT 3
ML	ENSMUSG00000029176	-0.228803	0.125468	0.636151	0.00378286	0.0819752	0.0112843	0.364982	Anapc4	anaphase promoting complex subunit 4
ML	ENSMUSG00000031516	-0.241162	0.0558343	0.537216	0.00381843	0.0821136	0.0190028	0.407587	Dctn6	dynactin 6
ML	ENSMUSG00000021067	-0.512584	0.0274169	0.454562	0.00384088	0.0822416	0.012636	0.372856	Sav1	salvador homolog 1 (Drosophila)
ML	ENSMUSG00000047554	-0.311303	0.0280247	0.457098	0.00385045	0.0822416	0.00979363	0.357379	Tmem41b	transmembrane protein 41B
ML	ENSMUSG00000033004	-0.46253	0.112293	0.619072	0.00386288	0.0823345	0.0452447	0.483247	Mycbp2	MYC binding protein 2
ML	ENSMUSG00000038418	-0.605848	0.0149438	0.395143	0.00390783	0.0825806	0.0418933	0.472779	Egr1	early growth response 1
ML	ENSMUSG00000009828	-0.528459	0.021408	0.429987	0.00391489	0.0825806	0.0105695	0.363549	Ick	intestinal cell kinase
ML	ENSMUSG00000040359	-0.297773	0.02149	0.429987	0.0039154	0.0825806	0.011138	0.363993	Ufl1	UFM1 specific ligase 1
ML	ENSMUSG00000023074	-0.400612	0.0271521	0.453291	0.0039175	0.0825806	0.0125565	0.372856	Mospd1	motile sperm domain containing 1
ML	ENSMUSG00000020473	-0.580272	0.0399142	0.497536	0.00393076	0.0825816	0.0267488	0.43017	Aebp1	AE binding protein 1
ML	ENSMUSG00000026484	-0.465068	0.00807692	0.345607	0.00398684	0.0829989	0.0234241	0.417729	Rnf2	ring finger protein 2
ML	ENSMUSG00000022255	-0.303081	0.00586299	0.327665	0.00401325	0.0833733	0.023136	0.417729	Mtdh	metadherin
ML	ENSMUSG00000029642	-0.257686	0.239884	0.741753	0.00402764	0.0833733	0.0138483	0.381774	Polr1d	polymerase (RNA) I polypeptide D
ML	ENSMUSG00000032850	-0.521914	0.0487364	0.523913	0.00403147	0.0833733	0.0284906	0.436517	Rnft2	ring finger protein, transmembrane 2
ML	ENSMUSG00000024012	-0.157918	0.390387	0.828323	0.0040333	0.0833744	0.0116779	0.368178	Mtch1	mitochondrial carrier homolog 1 (C. elegans)
ML	ENSMUSG00000017288	-0.381332	0.0117645	0.372158	0.00403711	0.083401	0.0387144	0.465688	Vps53	vacuolar protein sorting 53 (yeast)
ML	ENSMUSG00000034210	-0.475092	0.0215467	0.429987	0.00404621	0.083401	0.0135288	0.380504	Efcab14	EF-hand calcium binding domain 14
ML	ENSMUSG00000066568	-0.211817	0.0315549	0.469173	0.0040919	0.0836647	0.0256967	0.423572	Lsm14a	LSM14 homolog A (SCD6, S. cerevisiae)
ML	ENSMUSG00000034930	-0.545276	0.0080412	0.345607	0.00414563	0.0839646	0.0400349	0.467075	Rtkn	rhotekin
ML	ENSMUSG00000023965	-0.365548	0.00679126	0.332793	0.00415129	0.0839646	0.0442201	0.48066	Fbxl17	F-box and leucine-rich repeat protein 17
ML	ENSMUSG00000058444	-0.18967	0.233849	0.737842	0.00417316	0.0839729	0.0184676	0.405862	Map2k5	mitogen-activated protein kinase kinase 5
ML	ENSMUSG00000031299	-0.406873	0.0591011	0.541206	0.00423291	0.0842384	0.0126261	0.372856	Pdha1	pyruvate dehydrogenase E1 alpha 1
ML	ENSMUSG00000040760	-0.347347	0.0110009	0.367178	0.00429238	0.0845936	0.0409917	0.469625	Appl1	adaptor protein, phosphotyrosine interaction, PH domain and leucine zipper containing 1
ML	ENSMUSG00000026064	-0.22419	0.0306965	0.466138	0.00430491	0.0845936	0.016446	0.392879	Ptp4a1	protein tyrosine phosphatase 4a1
ML	ENSMUSG00000063253	-0.39456	0.0101028	0.358257	0.00430684	0.0845961	0.0156252	0.389542	Scoc	short coiled-coil protein
ML	ENSMUSG00000046032	-0.376382	0.00897429	0.351939	0.00432582	0.0848547	0.016785	0.395245	Snx12	sorting nexin 12
ML	ENSMUSG00000037997	-0.558373	0.0131229	0.382431	0.00433227	0.0848665	0.0190051	0.407587	Parp11	poly (ADP-ribose) polymerase family, member 11
ML	ENSMUSG00000018209	-0.310981	0.0142226	0.388865	0.0044545	0.0861194	0.017755	0.401793	Stk4	serine/threonine kinase 4
ML	ENSMUSG00000020888	-0.228933	0.0180138	0.413121	0.00445745	0.0861194	0.0158376	0.389542	Dvl2	dishevelled 2, dsh homolog (Drosophila)
ML	ENSMUSG00000025133	-0.120956	0.53764	0.888205	0.00460615	0.0869207	0.0125941	0.372856	Ints4	integrator complex subunit 4
ML	ENSMUSG00000021646	-0.455118	0.0179804	0.412757	0.00462409	0.08704	0.0146822	0.388908	Mccc2	methylcrotonoyl-Coenzyme A carboxylase 2 (beta)
ML	ENSMUSG00000038388	-1.10833	0.0124451	0.375823	0.00463116	0.0870809	0.0124584	0.372856	Mpp6	membrane protein, palmitoylated 6 (MAGUK p55 subfamily member 6)
ML	ENSMUSG00000037251	-0.235453	0.159981	0.674419	0.00463915	0.0870809	0.0133167	0.37886	Pomk	protein-O-mannose kinase
ML	ENSMUSG00000020288	-0.231731	0.235874	0.738929	0.00466173	0.087296	0.0292331	0.439808	Ahsa2	AHA1, activator of heat shock protein ATPase 2
ML	ENSMUSG00000032615	-1.59055	0.00816731	0.346355	0.00471141	0.0876296	0.0235048	0.417729	Nt5m	5',3'-nucleotidase, mitochondrial
ML	ENSMUSG00000024425	-0.332081	0.0125032	0.375823	0.00472256	0.0877328	0.0413699	0.47199	Ndfip1	Nedd4 family interacting protein 1
ML	ENSMUSG00000023861	-0.332508	0.19911	0.713741	0.00478842	0.088223	0.0132698	0.378139	Mpc1	mitochondrial pyruvate carrier 1
ML	ENSMUSG00000034563	-0.386232	0.0106511	0.364259	0.00479922	0.0883181	0.0175077	0.399562	Ccpg1	cell cycle progression 1
ML	ENSMUSG00000044408	-0.4498	0.0156733	0.398945	0.00481431	0.0883878	0.030882	0.449255	Sptssa	serine palmitoyltransferase, small subunit A
ML	ENSMUSG00000023027	-0.258752	0.0285134	0.458377	0.00484633	0.088518	0.0126084	0.372856	Atf1	activating transcription factor 1
ML	ENSMUSG00000031935	-0.365054	0.0403025	0.49842	0.00486341	0.0885195	0.0288233	0.437192	Med17	mediator complex subunit 17
ML	ENSMUSG00000029050	-0.350012	0.0289145	0.459937	0.0048701	0.0885195	0.0389739	0.465688	Ski	ski sarcoma viral oncogene homolog (avian)
ML	ENSMUSG00000022817	-0.531851	0.00849581	0.349442	0.00488709	0.0885195	0.0358217	0.460726	Itgb5	integrin beta 5
ML	ENSMUSG00000022663	-0.306766	0.0166931	0.402807	0.00495647	0.088963	0.0329329	0.455635	Atg3	autophagy related 3
ML	ENSMUSG00000073639	-0.236626	0.0128614	0.37902	0.00496727	0.0890033	0.0147811	0.388958	Rab18	RAB18, member RAS oncogene family
ML	ENSMUSG00000032507	-0.719637	0.0090229	0.351939	0.00498374	0.0891961	0.0222252	0.41475	Fbxl2	F-box and leucine-rich repeat protein 2
ML	ENSMUSG00000036632	-0.242684	0.0297889	0.463791	0.00499583	0.0892615	0.0299107	0.443786	Alg5	asparagine-linked glycosylation 5 (dolichyl-phosphate beta-glucosyltransferase)
ML	ENSMUSG00000052684	-0.33991	0.00986962	0.356925	0.00500081	0.0892635	0.0248164	0.419671	Jun	jun proto-oncogene
ML	ENSMUSG00000029776	-0.199569	0.106588	0.611137	0.00507896	0.0898261	0.0488841	0.490913	Hibadh	3-hydroxyisobutyrate dehydrogenase
ML	ENSMUSG00000008763	-0.656675	0.0104242	0.362141	0.00508017	0.0898261	0.013492	0.380504	Man1a2	mannosidase, alpha, class 1A, member 2
ML	ENSMUSG00000000600	-0.348971	0.016156	0.401292	0.0050938	0.0899316	0.024007	0.41803	Krit1	KRIT1, ankyrin repeat containing
ML	ENSMUSG00000062604	-0.220027	0.0477898	0.521214	0.00513435	0.0901616	0.0109084	0.363797	Srpk2	serine/arginine-rich protein specific kinase 2
ML	ENSMUSG00000032965	-0.301758	0.0675571	0.553298	0.00515899	0.0901616	0.0192137	0.407587	Ift57	intraflagellar transport 57
ML	ENSMUSG00000042079	-0.187622	0.0118585	0.373628	0.00516593	0.0901616	0.0170042	0.397343	Hnrnpf	heterogeneous nuclear ribonucleoprotein F
ML	ENSMUSG00000038975	-0.0818846	0.660051	0.924769	0.00519962	0.0902696	0.0212459	0.413463	Rabggtb	Rab geranylgeranyl transferase, b subunit
ML	ENSMUSG00000037646	-0.339821	0.0730668	0.561579	0.00522573	0.0903912	0.0156145	0.389542	Vps13b	vacuolar protein sorting 13B (yeast)
ML	ENSMUSG00000050373	-0.360361	0.0108484	0.36586	0.0052294	0.0903959	0.0436589	0.478201	Snx21	sorting nexin family member 21
ML	ENSMUSG00000031774	-0.158095	0.0374833	0.489843	0.00528808	0.0905925	0.0271039	0.431738	Fam192a	family with sequence similarity 192, member A
ML	ENSMUSG00000025374	-0.417891	0.0204857	0.42811	0.0053474	0.0911854	0.0129392	0.374958	Nabp2	nucleic acid binding protein 2
ML	ENSMUSG00000006599	-0.113419	0.560433	0.896541	0.00538023	0.091446	0.0231515	0.417729	Gtf2h1	general transcription factor II H, polypeptide 1
ML	ENSMUSG00000038533	-0.288886	0.0155735	0.398945	0.00539424	0.091552	0.0272405	0.432322	Cbfa2t2	core-binding factor, runt domain, alpha subunit 2, translocated to, 2 (human)
ML	ENSMUSG00000042719	-0.237672	0.0193464	0.419872	0.00545169	0.0919356	0.0129276	0.374958	Naa25	N(alpha)-acetyltransferase 25, NatB auxiliary subunit
ML	ENSMUSG00000031556	-0.516502	0.0504235	0.525562	0.00547336	0.0920619	0.015021	0.389542	Tm2d2	TM2 domain containing 2
ML	ENSMUSG00000003873	-0.132179	0.374091	0.819052	0.0054838	0.0921059	0.0133445	0.37886	Bax	BCL2-associated X protein
ML	ENSMUSG00000005846	-0.224104	0.0123477	0.375554	0.00549774	0.0921059	0.0358132	0.460726	Rsl1d1	ribosomal L1 domain containing 1
ML	ENSMUSG00000024604	-0.241226	0.0272672	0.454234	0.00550644	0.0921059	0.0157487	0.389542	Rbm22	RNA binding motif protein 22
ML	ENSMUSG00000025949	-0.363653	0.0392201	0.495652	0.00550835	0.0921059	0.0239812	0.41803	Pikfyve	phosphoinositide kinase, FYVE finger containing
ML	ENSMUSG00000024077	-0.654777	0.00605947	0.329267	0.00554404	0.0921858	0.046579	0.486615	Strn	striatin, calmodulin binding protein
ML	ENSMUSG00000021007	-0.113557	0.686357	0.930876	0.00555635	0.0922809	0.0181934	0.404149	Spata7	spermatogenesis associated 7
ML	ENSMUSG00000027540	-0.438792	0.00913734	0.352826	0.00557588	0.0924242	0.0148113	0.389297	Ptpn1	protein tyrosine phosphatase, non-receptor type 1
ML	ENSMUSG00000022200	-0.177999	0.0427461	0.505419	0.00563364	0.0928446	0.040547	0.468376	Golph3	golgi phosphoprotein 3
ML	ENSMUSG00000073563	-0.441379	0.0148474	0.394526	0.00568657	0.0929467	0.0168497	0.39543	Csnk1g3	casein kinase 1, gamma 3
ML	ENSMUSG00000042419	-0.498199	0.0122682	0.375164	0.00569924	0.0929467	0.0225846	0.416176	Nfkbil1	nuclear factor of kappa light polypeptide gene enhancer in B cells inhibitor like 1
ML	ENSMUSG00000094870	-0.35681	0.0371445	0.489405	0.00571322	0.0929984	0.0148299	0.389297	Zfp131	zinc finger protein 131
ML	ENSMUSG00000051451	-0.0163401	0.921815	0.985314	0.00578136	0.0934594	0.0211876	0.413463	Crebzf	CREB/ATF bZIP transcription factor
ML	ENSMUSG00000057130	-0.530214	0.0111591	0.367606	0.00584132	0.0937158	0.01854	0.405862	Txnl4a	thioredoxin-like 4A
ML	ENSMUSG00000035274	-0.422841	0.0641419	0.54682	0.00584339	0.0937158	0.0312387	0.449849	Tpbg	trophoblast glycoprotein
ML	ENSMUSG00000020107	-0.538708	0.0242655	0.44145	0.00584935	0.0937158	0.0266143	0.429753	Anapc16	anaphase promoting complex subunit 16
ML	ENSMUSG00000028057	-0.403818	0.0257154	0.448269	0.00593165	0.0945183	0.0385465	0.465391	Rit1	Ras-like without CAAX 1
ML	ENSMUSG00000061288	-0.286308	0.0931695	0.594827	0.00594085	0.0945183	0.0384836	0.465142	Taok3	TAO kinase 3
ML	ENSMUSG00000026739	-0.228051	0.0755027	0.566183	0.00595148	0.0945416	0.022526	0.416143	Bmi1	Bmi1 polycomb ring finger oncogene
ML	ENSMUSG00000034686	-0.548352	0.376926	0.82068	0.00597525	0.0946984	0.0152275	0.389542	Prr7	proline rich 7 (synaptic)
ML	ENSMUSG00000001288	-0.557184	0.0193046	0.419409	0.00599343	0.0947557	0.0485192	0.490157	Rarg	retinoic acid receptor, gamma
ML	ENSMUSG00000020653	-0.323518	0.0873894	0.585303	0.00600589	0.0948357	0.0210575	0.413463	Klf11	Kruppel-like factor 11
ML	ENSMUSG00000028426	-0.284691	0.0084648	0.348853	0.00608656	0.0955116	0.0292826	0.439808	Rad23b	RAD23b homolog (S. cerevisiae)
ML	ENSMUSG00000026187	-0.370911	0.0247601	0.442986	0.00610517	0.0955116	0.013826	0.381774	Xrcc5	X-ray repair complementing defective repair in Chinese hamster cells 5
ML	ENSMUSG00000041775	-0.255233	0.117975	0.627288	0.00612438	0.0955116	0.0144884	0.387357	Mapk1ip1	mitogen-activated protein kinase 1 interacting protein 1
ML	ENSMUSG00000022453	-0.151137	0.226359	0.732455	0.0061455	0.0955299	0.0201619	0.41016	Naga	N-acetyl galactosaminidase, alpha
ML	ENSMUSG00000023932	-0.33053	0.0224025	0.432614	0.00617848	0.0958062	0.0389523	0.465688	Cdc5l	cell division cycle 5-like (S. pombe)
ML	ENSMUSG00000048175	-0.292819	0.0283114	0.457357	0.00623572	0.0961366	0.0287346	0.437135	Asb8	ankyrin repeat and SOCS box-containing 8
ML	ENSMUSG00000063049	-0.369903	0.186915	0.702652	0.00626315	0.0964774	0.0280969	0.435601	Ing2	inhibitor of growth family, member 2
ML	ENSMUSG00000025950	-0.576239	0.0269357	0.451878	0.00626883	0.0964886	0.0373082	0.46257	Idh1	isocitrate dehydrogenase 1 (NADP+), soluble
ML	ENSMUSG00000006392	-0.288436	0.0115828	0.368896	0.00629989	0.0966124	0.0235095	0.417729	Med8	mediator complex subunit 8
ML	ENSMUSG00000026867	-0.204342	0.013621	0.385478	0.00637516	0.0971063	0.0230839	0.417729	Gapvd1	GTPase activating protein and VPS9 domains 1
ML	ENSMUSG00000034163	-0.305313	0.0814567	0.575297	0.00637807	0.0971191	0.0260313	0.426184	Zfc3h1	zinc finger, C3H1-type containing
ML	ENSMUSG00000033396	-0.444829	0.0927714	0.594008	0.0063985	0.0971475	0.0230955	0.417729	Spg11	spastic paraplegia 11
ML	ENSMUSG00000095304	-1.07258	0.0430035	0.506092	0.00642993	0.0971475	0.0186209	0.405862	Plac9a	placenta specific 9a
ML	ENSMUSG00000029622	-0.365533	0.0131683	0.383252	0.00644051	0.0971475	0.0301394	0.444554	Arpc1b	actin related protein 2/3 complex, subunit 1B
ML	ENSMUSG00000028082	-0.569224	0.037222	0.489491	0.00649931	0.0976665	0.0305021	0.446777	Sh3d19	SH3 domain protein D19
ML	ENSMUSG00000060450	-0.422421	0.0105361	0.362847	0.00651509	0.0978722	0.034385	0.45793	Rnf14	ring finger protein 14
ML	ENSMUSG00000022248	-0.323783	0.031726	0.469361	0.00656207	0.0980292	0.0394276	0.466229	Rad1	RAD1 checkpoint DNA exonuclease
ML	ENSMUSG00000027671	-0.299362	0.0153401	0.398112	0.00658287	0.098084	0.035414	0.459301	Actl6a	actin-like 6A
ML	ENSMUSG00000020585	-0.29406	0.0883692	0.587513	0.00664054	0.0983755	0.0208397	0.413369	Laptm4a	lysosomal-associated protein transmembrane 4A
ML	ENSMUSG00000030704	-0.311429	0.0103188	0.361563	0.00665655	0.0984955	0.0182734	0.404149	Rab6a	RAB6A, member RAS oncogene family
ML	ENSMUSG00000021481	-0.782816	0.0249779	0.444269	0.00665956	0.0984955	0.0285567	0.43712	Zfp346	zinc finger protein 346
ML	ENSMUSG00000048616	-1.12229	0.0598878	0.542179	0.00666416	0.0984955	0.0162145	0.390554	Nog	noggin
ML	ENSMUSG00000024978	-0.530935	0.0141101	0.387834	0.00667939	0.098543	0.0158377	0.389542	Gpam	glycerol-3-phosphate acyltransferase, mitochondrial
ML	ENSMUSG00000034327	-0.506101	0.0150536	0.39635	0.00668651	0.0985659	0.0291749	0.439644	Kctd9	potassium channel tetramerisation domain containing 9
ML	ENSMUSG00000020564	-0.365781	0.0759199	0.566983	0.00672374	0.0987813	0.0340835	0.457281	Atxn7l1	ataxin 7-like 1
ML	ENSMUSG00000053898	-0.433399	0.0220742	0.431512	0.00672515	0.0987813	0.0314583	0.450545	Ech1	enoyl coenzyme A hydratase 1, peroxisomal
ML	ENSMUSG00000029469	-0.418521	0.0191829	0.419382	0.00672622	0.0987813	0.0319793	0.453084	Ift81	intraflagellar transport 81
ML	ENSMUSG00000021810	-0.0963244	0.476319	0.865344	0.00672736	0.0987813	0.0275347	0.433691	Ecd	ecdysoneless homolog (Drosophila)
ML	ENSMUSG00000030327	-0.428998	0.0181975	0.414498	0.00674794	0.0988669	0.0387076	0.465688	Necap1	NECAP endocytosis associated 1
ML	ENSMUSG00000032127	-0.127563	0.0862362	0.58377	0.00676183	0.0989817	0.0372542	0.46257	Vps11	vacuolar protein sorting 11 (yeast)
ML	ENSMUSG00000047712	-0.60397	0.0155391	0.398945	0.00680785	0.0991948	0.0415591	0.472403	Ust	uronyl-2-sulfotransferase
ML	ENSMUSG00000028690	-0.40281	0.0357262	0.483332	0.00682995	0.0992361	0.0297225	0.44282	Mmachc	methylmalonic aciduria cblC type, with homocystinuria
ML	ENSMUSG00000056459	-0.683016	0.0511696	0.527057	0.00684819	0.0992861	0.021174	0.413463	Zbtb25	zinc finger and BTB domain containing 25
ML	ENSMUSG00000034345	-0.380827	0.0602012	0.542342	0.00687249	0.0994541	0.0173518	0.397961	Gtf2h5	general transcription factor IIH, polypeptide 5
ML	ENSMUSG00000030982	-0.250332	0.0978797	0.601458	0.0069025	0.0995551	0.0197278	0.409137	9030624J02Rik	RIKEN cDNA 9030624J02 gene
ML	ENSMUSG00000004631	-0.483123	0.0359115	0.483332	0.00693227	0.0995551	0.0234999	0.417729	Sgce	sarcoglycan, epsilon
ML	ENSMUSG00000036810	-0.277455	0.0827925	0.577718	0.00693322	0.0995551	0.0183629	0.405084	Cnep1r1	CTD nuclear envelope phosphatase 1 regulatory subunit 1
ML	ENSMUSG00000020590	-0.321716	0.0360498	0.483332	0.00693427	0.0995551	0.0266719	0.429753	Snx13	sorting nexin 13
ML	ENSMUSG00000021661	-0.318427	0.0765234	0.568147	0.00693557	0.0995551	0.0304437	0.446479	Ankra2	ankyrin repeat, family A (RFXANK-like), 2
ML	ENSMUSG00000016256	-0.866537	0.00158137	0.259016	0.00699639	0.100014	0.0223008	0.41475	Ctsz	cathepsin Z
ML	ENSMUSG00000032527	-0.411423	0.0311378	0.466737	0.00703569	0.100103	0.0251461	0.421492	Pccb	propionyl Coenzyme A carboxylase, beta polypeptide
ML	ENSMUSG00000063605	-0.226525	0.33205	0.796408	0.00703688	0.100103	0.0325227	0.45467	Ccdc102a	coiled-coil domain containing 102A
ML	ENSMUSG00000020358	-0.134101	0.43278	0.848498	0.00717176	0.100742	0.0214806	0.413779	Hnrnpab	heterogeneous nuclear ribonucleoprotein A/B
ML	ENSMUSG00000003847	-0.423852	0.0585278	0.540771	0.00722338	0.10113	0.0487486	0.490808	Nfat5	nuclear factor of activated T cells 5
ML	ENSMUSG00000041890	-0.459947	0.00741786	0.338145	0.00724464	0.10122	0.0241437	0.418322	Git2	G protein-coupled receptor kinase-interactor 2
ML	ENSMUSG00000018541	-0.173487	0.0864877	0.583852	0.00730839	0.101584	0.0384239	0.464851	Cwc25	CWC25 spliceosome-associated protein homolog (S. cerevisiae)
ML	ENSMUSG00000047187	-0.159596	0.118085	0.627288	0.00738642	0.101822	0.0375301	0.46257	Rab2a	RAB2A, member RAS oncogene family
ML	ENSMUSG00000032475	-0.189142	0.0321803	0.471734	0.00751225	0.102429	0.0372146	0.46257	Nck1	non-catalytic region of tyrosine kinase adaptor protein 1
ML	ENSMUSG00000027706	-0.299978	0.0178795	0.412611	0.00755176	0.10264	0.0336492	0.457156	Sec62	SEC62 homolog (S. cerevisiae)
ML	ENSMUSG00000038546	-0.246403	0.0652198	0.547782	0.00763511	0.102935	0.0366363	0.46257	Ranbp9	RAN binding protein 9
ML	ENSMUSG00000036955	-0.399528	0.0809549	0.57459	0.00773556	0.103037	0.0184106	0.405388	Kif1bp	KIF1 binding protein
ML	ENSMUSG00000029823	-0.178588	0.111872	0.618284	0.00774272	0.103037	0.0173523	0.397961	Luc7l2	LUC7-like 2 (S. cerevisiae)
ML	ENSMUSG00000059482	-0.585784	0.0156872	0.398945	0.00779913	0.103392	0.0212611	0.413463	2610301B20Rik	RIKEN cDNA 2610301B20 gene
ML	ENSMUSG00000015542	-0.466722	0.0188402	0.417759	0.00779945	0.103392	0.0274351	0.43365	Nat9	N-acetyltransferase 9 (GCN5-related, putative)
ML	ENSMUSG00000028932	-0.123306	0.261943	0.755251	0.00780089	0.103392	0.0379496	0.462985	Psmc2	proteasome (prosome, macropain) 26S subunit, ATPase 2
ML	ENSMUSG00000021012	-0.157176	0.371042	0.817526	0.00782579	0.103487	0.04418	0.480635	Zc3h14	zinc finger CCCH type containing 14
ML	ENSMUSG00000042770	-0.600408	0.0557888	0.537216	0.00782872	0.103487	0.042431	0.474533	Hebp1	heme binding protein 1
ML	ENSMUSG00000029524	-0.341559	0.0768249	0.568538	0.00785007	0.103535	0.0331041	0.456142	Sirt4	sirtuin 4
ML	ENSMUSG00000038991	-0.198774	0.187175	0.702965	0.0078914	0.103677	0.0332195	0.456142	Txndc5	thioredoxin domain containing 5
ML	ENSMUSG00000032249	-0.286416	0.0249839	0.444269	0.00793304	0.103715	0.0231069	0.417729	Anp32a	acidic (leucine-rich) nuclear phosphoprotein 32 family, member A
ML	ENSMUSG00000020519	-0.431563	0.0449623	0.512693	0.00797595	0.103828	0.0221964	0.41455	Sap30l	SAP30-like
ML	ENSMUSG00000022280	-0.323229	0.0129953	0.380602	0.00800197	0.103847	0.0346796	0.458564	Rnf19a	ring finger protein 19A
ML	ENSMUSG00000053746	-0.598426	0.0243367	0.44145	0.00801219	0.103847	0.0340528	0.457281	Ptrh1	peptidyl-tRNA hydrolase 1 homolog (S. cerevisiae)
ML	ENSMUSG00000095098	-0.36552	0.114165	0.6214	0.00813525	0.104481	0.0241411	0.418322	Ccdc85b	coiled-coil domain containing 85B
ML	ENSMUSG00000073423	-0.261369	0.0269423	0.451878	0.0081845	0.104632	0.0281514	0.435601	Zfp414	zinc finger protein 414
ML	ENSMUSG00000023079	-0.223738	0.166822	0.680488	0.00827781	0.104792	0.0309487	0.449255	Gtf2ird1	general transcription factor II I repeat domain-containing 1
ML	ENSMUSG00000020171	-0.169689	0.319107	0.78969	0.00827932	0.104792	0.019388	0.40766	Yeats4	YEATS domain containing 4
ML	ENSMUSG00000056204	-0.481529	0.0585188	0.540771	0.00834254	0.104936	0.036268	0.461121	Pgpep1	pyroglutamyl-peptidase I
ML	ENSMUSG00000032435	-0.340292	0.0222283	0.431694	0.00850648	0.105406	0.0234446	0.417729	Dync1li1	dynein cytoplasmic 1 light intermediate chain 1
ML	ENSMUSG00000024271	-0.31073	0.210886	0.722244	0.00860204	0.105907	0.0231058	0.417729	Elp2	elongator acetyltransferase complex subunit 2
ML	ENSMUSG00000041415	-0.360586	0.0391629	0.495419	0.00862537	0.105933	0.0181961	0.404149	Dicer1	dicer 1, ribonuclease type III
ML	ENSMUSG00000055204	-0.220471	0.0532127	0.53169	0.00866286	0.105975	0.0342355	0.457757	Ankrd17	ankyrin repeat domain 17
ML	ENSMUSG00000041308	-0.573547	0.0310143	0.466737	0.00872592	0.106014	0.0310745	0.449808	Sntb2	syntrophin, basic 2
ML	ENSMUSG00000019841	-0.428257	0.0167745	0.402943	0.00875673	0.106121	0.0197458	0.409137	Rev3l	REV3-like, catalytic subunit of DNA polymerase zeta RAD54 like (S. cerevisiae)
ML	ENSMUSG00000028807	-0.653765	0.0222945	0.432129	0.00880166	0.106138	0.0475711	0.487646	Zbtb8a	zinc finger and BTB domain containing 8a
ML	ENSMUSG00000039166	-0.542599	0.0165946	0.402807	0.00882143	0.106138	0.0370351	0.46257	Akap7	A kinase (PRKA) anchor protein 7
ML	ENSMUSG00000015016	-0.267769	0.0284787	0.458325	0.00888949	0.106532	0.0392348	0.465688	Acsf3	acyl-CoA synthetase family member 3
ML	ENSMUSG00000096199	-0.319465	0.0961584	0.597693	0.00898231	0.106828	0.0364556	0.461612	Ptrhd1	peptidyl-tRNA hydrolase domain containing 1
ML	ENSMUSG00000022621	-0.212046	0.241386	0.742836	0.00899382	0.106828	0.03218	0.453461	Rabl2	RAB, member RAS oncogene family-like 2
ML	ENSMUSG00000024006	-0.458035	0.00876302	0.351939	0.00903455	0.106951	0.0218173	0.414159	Stk38	serine/threonine kinase 38
ML	ENSMUSG00000021501	-0.233474	0.0291655	0.461157	0.0091863	0.107571	0.0291892	0.439644	Caml	calcium modulating ligand
ML	ENSMUSG00000021982	-0.465479	0.0347383	0.478572	0.00922172	0.10761	0.0386922	0.465688	Cdadc1	cytidine and dCMP deaminase domain containing 1
ML	ENSMUSG00000011958	-0.401738	0.0247238	0.442855	0.00925093	0.107843	0.0203873	0.411118	Bnip2	BCL2/adenovirus E1B interacting protein 2
ML	ENSMUSG00000070056	-0.596447	0.0251159	0.444732	0.0092687	0.107926	0.0166996	0.395245	Mfhas1	malignant fibrous histiocytoma amplified sequence 1
ML	ENSMUSG00000034254	-0.176687	0.0982407	0.601729	0.00938958	0.108784	0.0497021	0.491964	Agpat1	1-acylglycerol-3-phosphate O-acyltransferase 1 (lysophosphatidic acid acyltransferase, alpha)
ML	ENSMUSG00000042659	-0.431982	0.0954912	0.596762	0.00941268	0.108863	0.0200906	0.41016	Arrdc4	arrestin domain containing 4
ML	ENSMUSG00000020150	-0.237197	0.494954	0.873453	0.00947828	0.10906	0.0352474	0.458664	Gamt	guanidinoacetate methyltransferase
ML	ENSMUSG00000019897	-0.184383	0.215782	0.725301	0.00949027	0.10906	0.0215632	0.413779	Ccdc59	coiled-coil domain containing 59
ML	ENSMUSG00000037876	-0.287847	0.0806211	0.573426	0.00951236	0.10916	0.0335705	0.456913	Jmjd1c	jumonji domain containing 1C
ML	ENSMUSG00000021428	-0.496326	0.0186482	0.417386	0.00955812	0.109227	0.0187747	0.407103	Riok1	RIO kinase 1 (yeast)
ML	ENSMUSG00000029048	-0.10571	0.0705155	0.55713	0.00962778	0.10949	0.0408269	0.468929	Rer1	RER1 retention in endoplasmic reticulum 1 homolog (S. cerevisiae)
ML	ENSMUSG00000055371	-0.323141	0.0754506	0.566183	0.00964283	0.109608	0.0381363	0.46406	Stam2	signal transducing adaptor molecule (SH3 domain and ITAM motif) 2
ML	ENSMUSG00000090084	-1.04074	0.014627	0.392735	0.00968808	0.109847	0.0393434	0.465937	Srpx	sushi-repeat-containing protein
ML	ENSMUSG00000032463	-0.720599	0.0230264	0.436299	0.00984811	0.110539	0.0490138	0.491223	Faim	Fas apoptotic inhibitory molecule
ML	ENSMUSG00000033917	-0.38647	0.126953	0.638439	0.00992364	0.1108	0.0270007	0.431738	Gde1	glycerophosphodiester phosphodiesterase 1
ML	ENSMUSG00000038005	-0.295592	0.0211994	0.429869	0.00994801	0.110876	0.0249318	0.42041	2700029M09Rik	RIKEN cDNA 2700029M09 gene

## Sheet: C. FTM
Trait	Gene ID	coef.all	p value.all	q value.all	p value.robust	q value.robust	p value.max	q value.max	Symbol	Description
FTM	ENSMUSG00000030516	0.405672	0.000108653	0.13423	1.59584e-07	0.00475784	9.71178e-07	0.045592	Tjp1	tight junction protein 1
FTM	ENSMUSG00000031090	0.64278	2.58392e-06	0.040434	3.11505e-07	0.00475784	3.41509e-06	0.0534404	Nadsyn1	NAD synthetase 1
FTM	ENSMUSG00000022641	0.405304	2.76242e-05	0.0997553	4.13641e-07	0.00475784	2.21641e-06	0.0520248	Bbx	bobby sox homolog (Drosophila)
FTM	ENSMUSG00000054520	0.60426	6.80729e-05	0.127827	5.78123e-06	0.0173921	2.6543e-05	0.178009	Sh3bp2	SH3-domain binding protein 2
FTM	ENSMUSG00000005378	0.407349	6.79312e-05	0.127827	8.29424e-06	0.0194687	5.00111e-05	0.182564	Wbscr22	Williams Beuren syndrome chromosome region 22
FTM	ENSMUSG00000001248	0.338445	4.1425e-05	0.121544	2.13833e-05	0.0257395	0.000125502	0.231034	Gramd1a	GRAM domain containing 1A
FTM	ENSMUSG00000028655	0.87238	0.000288924	0.177749	3.42671e-05	0.0283573	0.000182516	0.231034	Mfsd2a	major facilitator superfamily domain containing 2A
FTM	ENSMUSG00000027510	0.691653	0.000337739	0.180154	3.98082e-05	0.0287501	0.000330305	0.231034	Rbm38	RNA binding motif protein 38
FTM	ENSMUSG00000034723	0.510437	0.0020401	0.272301	5.89361e-05	0.0317868	0.000203232	0.231034	Tmx4	thioredoxin-related transmembrane protein 4
FTM	ENSMUSG00000021285	0.389047	0.00470801	0.317608	7.88938e-05	0.0324455	0.000286977	0.231034	Ppp1r13b	protein phosphatase 1, regulatory (inhibitor) subunit 13B
FTM	ENSMUSG00000040033	0.508995	0.00676804	0.332793	8.54047e-05	0.0324455	0.000820479	0.254225	Stat2	signal transducer and activator of transcription 2
FTM	ENSMUSG00000032667	0.477048	0.000629961	0.205262	9.16296e-05	0.0324455	0.000516964	0.231132	Pon2	paraoxonase 2
FTM	ENSMUSG00000031709	0.595029	0.00113981	0.234195	0.000117735	0.0339017	0.000410065	0.231034	Tbc1d9	TBC1 domain family, member 9
FTM	ENSMUSG00000030826	0.300108	0.00276554	0.286946	0.000127765	0.0341287	0.000747931	0.247943	Bcat2	branched chain aminotransferase 2, mitochondrial
FTM	ENSMUSG00000054939	0.851249	0.000305482	0.177749	0.000128153	0.0341287	0.00153502	0.275044	Zfp174	zinc finger protein 174
FTM	ENSMUSG00000033902	0.317821	0.00293945	0.291031	0.000130898	0.0341287	0.000928228	0.254318	Mapkbp1	mitogen-activated protein kinase binding protein 1
FTM	ENSMUSG00000031827	1.07595	0.000463289	0.191387	0.000134253	0.0341287	0.000608309	0.238146	Cotl1	coactosin-like 1 (Dictyostelium)
FTM	ENSMUSG00000022951	0.209191	0.335235	0.798138	0.000159819	0.0350996	0.00134873	0.272256	Rcan1	regulator of calcineurin 1
FTM	ENSMUSG00000025855	1.27458	0.000351743	0.180154	0.000161331	0.0350996	0.000630235	0.238146	Prkar1b	protein kinase, cAMP dependent regulatory, type I beta
FTM	ENSMUSG00000036983	0.496227	0.000520267	0.194582	0.000162022	0.0350996	0.000691463	0.240795	Tfb1m	transcription factor B1, mitochondrial
FTM	ENSMUSG00000005370	0.350499	0.00109765	0.232885	0.000204447	0.0369805	0.00105913	0.257482	Msh6	mutS homolog 6 (E. coli)
FTM	ENSMUSG00000033960	0.511745	0.0139626	0.387834	0.000214313	0.0370673	0.00210363	0.302102	9430020K01Rik	RIKEN cDNA 9430020K01 gene
FTM	ENSMUSG00000062012	0.376059	0.00134303	0.246336	0.000235113	0.0382654	0.000960341	0.254937	Zfp13	zinc finger protein 13
FTM	ENSMUSG00000053134	0.300333	0.00221393	0.276625	0.000263173	0.03919	0.00102325	0.257482	Supt7l	suppressor of Ty 7-like
FTM	ENSMUSG00000062054	0.184255	0.0160317	0.400751	0.000291624	0.0399702	0.00148888	0.2741	Iah1	isoamyl acetate-hydrolyzing esterase 1 homolog (S. cerevisiae)
FTM	ENSMUSG00000046572	0.536181	0.00611879	0.329267	0.000292891	0.0399702	0.0010078	0.257482	Zfp518b	zinc finger protein 518B
FTM	ENSMUSG00000003184	0.308439	0.00210802	0.273782	0.000295474	0.0402059	0.00169677	0.284743	Irf3	interferon regulatory factor 3
FTM	ENSMUSG00000038312	0.313073	0.0159375	0.400677	0.000297047	0.0402942	0.00228619	0.303324	Edem2	ER degradation enhancer, mannosidase alpha-like 2
FTM	ENSMUSG00000020747	0.19528	0.0252318	0.445308	0.000332188	0.0416681	0.00195621	0.302102	2310067B10Rik	RIKEN cDNA 2310067B10 gene
FTM	ENSMUSG00000027163	0.248856	0.00247692	0.285196	0.000339592	0.0420637	0.00129209	0.272256	Commd9	COMM domain containing 9
FTM	ENSMUSG00000008435	0.465834	0.00473018	0.318265	0.000349009	0.0425985	0.00152777	0.275044	Rdh13	retinol dehydrogenase 13 (all-trans and 9-cis)
FTM	ENSMUSG00000023456	0.375354	0.00122141	0.237099	0.000361482	0.0429618	0.00119808	0.259189	Tpi1	triosephosphate isomerase 1
FTM	ENSMUSG00000033276	0.424478	0.00142804	0.249216	0.000388459	0.0436404	0.00124255	0.266354	Stk36	serine/threonine kinase 36
FTM	ENSMUSG00000037379	1.37114	0.000865207	0.220863	0.000400832	0.0436404	0.00150928	0.275044	Spon2	spondin 2, extracellular matrix protein
FTM	ENSMUSG00000050240	0.405305	0.00347444	0.298732	0.000405434	0.0436404	0.00269583	0.311381	Hic2	hypermethylated in cancer 2
FTM	ENSMUSG00000049287	0.467735	0.00508554	0.320172	0.000414187	0.0437263	0.00147038	0.272256	Iba57	IBA57, iron-sulfur cluster assembly homolog (S. cerevisiae)
FTM	ENSMUSG00000040532	0.360778	0.00208884	0.273435	0.000417738	0.0439474	0.00388214	0.322742	Abhd11	abhydrolase domain containing 11
FTM	ENSMUSG00000059791	0.81326	0.000925906	0.2262	0.00043695	0.0448647	0.00219626	0.302356	Nrm	nurim (nuclear envelope membrane protein)
FTM	ENSMUSG00000074141	0.744686	0.00492854	0.320172	0.000458445	0.0454622	0.00113437	0.257482	Il4i1	interleukin 4 induced 1
FTM	ENSMUSG00000025650	1.19488	0.00588616	0.328195	0.000493419	0.046336	0.0015309	0.275044	Col7a1	collagen, type VII, alpha 1
FTM	ENSMUSG00000025507	0.464747	0.00166378	0.264523	0.000493756	0.046336	0.00301589	0.314657	Pidd1	p53 induced death domain protein 1
FTM	ENSMUSG00000002227	0.367206	0.0355522	0.482596	0.000511154	0.0470186	0.00685634	0.348758	Mov10	Moloney leukemia virus 10
FTM	ENSMUSG00000040428	0.798504	0.00203324	0.272301	0.000512999	0.0470366	0.00201873	0.302102	Plekha4	pleckstrin homology domain containing, family A (phosphoinositide binding specific) member 4
FTM	ENSMUSG00000031367	0.676946	0.00225104	0.276641	0.000517267	0.0471008	0.00176032	0.288518	Ap1s2	adaptor-related protein complex 1, sigma 2 subunit
FTM	ENSMUSG00000025161	1.46307	0.00158856	0.259016	0.000524595	0.0475426	0.00217673	0.302327	Slc16a3	solute carrier family 16 (monocarboxylic acid transporters), member 3
FTM	ENSMUSG00000033763	0.452063	0.00288772	0.288351	0.000529363	0.0476621	0.00205879	0.302102	Mtss1l	metastasis suppressor 1-like
FTM	ENSMUSG00000063810	0.364566	0.00111038	0.232885	0.000535929	0.0478424	0.0040641	0.322742	Alms1	Alstrom syndrome 1
FTM	ENSMUSG00000098789	0.235437	0.0366695	0.486011	0.000547119	0.0481395	0.00179008	0.290779	Jmjd7	jumonji domain containing 7
FTM	ENSMUSG00000031148	0.487671	0.00182721	0.27182	0.000555546	0.0483861	0.00224318	0.303173	Gpkow	G patch domain and KOW motifs
FTM	ENSMUSG00000021109	0.3639	0.00122224	0.237099	0.000561297	0.0484406	0.0063439	0.345056	Hif1a	hypoxia inducible factor 1, alpha subunit
FTM	ENSMUSG00000021196	0.595209	0.00124234	0.238047	0.000591503	0.0491615	0.00171137	0.284743	Pfkp	phosphofructokinase, platelet
FTM	ENSMUSG00000011832	0.14508	0.0586247	0.540771	0.00060184	0.0494805	0.00336891	0.318607	Evi5l	ecotropic viral integration site 5 like
FTM	ENSMUSG00000022562	0.549419	0.00349886	0.298946	0.000619101	0.0499397	0.0025189	0.308039	Oplah	5-oxoprolinase (ATP-hydrolysing)
FTM	ENSMUSG00000000627	1.05059	0.00167577	0.264523	0.000629697	0.0503064	0.00357092	0.322742	Sema4f	sema domain, immunoglobulin domain (Ig), TM domain, and short cytoplasmic domain
FTM	ENSMUSG00000041936	0.604522	0.0158458	0.399721	0.000651088	0.0509714	0.00323484	0.317034	Agrn	agrin
FTM	ENSMUSG00000001280	0.189608	0.0276012	0.454991	0.000658726	0.0509714	0.00252661	0.308039	Sp1	trans-acting transcription factor 1
FTM	ENSMUSG00000038957	0.243554	0.00345374	0.298044	0.000665656	0.0509714	0.00237169	0.303324	Edc3	enhancer of mRNA decapping 3 homolog (S. cerevisiae)
FTM	ENSMUSG00000020630	0.299321	0.00140979	0.248873	0.000675523	0.0509714	0.00258928	0.310086	Rnaseh1	ribonuclease H1
FTM	ENSMUSG00000039116	1.35017	0.001142	0.234195	0.000678318	0.0509714	0.00231611	0.303324	Adgrg6	adhesion G protein-coupled receptor G6
FTM	ENSMUSG00000007827	0.771665	0.0020404	0.272301	0.000682177	0.0509714	0.00923081	0.357379	Ankrd26	ankyrin repeat domain 26
FTM	ENSMUSG00000029501	0.185332	0.0395233	0.496881	0.000683111	0.0509714	0.00439195	0.329436	Ankle2	ankyrin repeat and LEM domain containing 2
FTM	ENSMUSG00000053646	0.325679	0.293959	0.774879	0.000684324	0.0509714	0.00315696	0.314657	Plxnb1	plexin B1
FTM	ENSMUSG00000024581	0.24351	0.0242609	0.44145	0.000691042	0.0510434	0.00406331	0.322742	Napg	N-ethylmaleimide sensitive fusion protein attachment protein gamma
FTM	ENSMUSG00000093445	0.137909	0.0131033	0.382431	0.000691524	0.0510434	0.00244791	0.305719	Lrch4	leucine-rich repeats and calponin homology (CH) domain containing 4
FTM	ENSMUSG00000061207	0.317786	0.00228157	0.276765	0.00073388	0.0518259	0.00234073	0.303324	Stk19	serine/threonine kinase 19
FTM	ENSMUSG00000029263	0.355931	0.0691469	0.556244	0.00073813	0.0519513	0.0101188	0.359053	Pigg	phosphatidylinositol glycan anchor biosynthesis, class G
FTM	ENSMUSG00000038056	0.326138	0.00227499	0.276746	0.000775351	0.0529481	0.002801	0.313079	Kmt2c	lysine (K)-specific methyltransferase 2C
FTM	ENSMUSG00000032583	0.176715	0.0346935	0.478572	0.000784525	0.0530227	0.0024376	0.305719	Mon1a	MON1 homolog A (yeast)
FTM	ENSMUSG00000041762	0.480551	0.00283029	0.288236	0.000785013	0.0530227	0.00467732	0.331599	Gpr155	G protein-coupled receptor 155
FTM	ENSMUSG00000000384	0.200987	0.00216093	0.275581	0.000792899	0.0530227	0.00661083	0.345895	Tbrg4	transforming growth factor beta regulated gene 4
FTM	ENSMUSG00000002210	0.246319	0.00187913	0.27182	0.000798531	0.0530227	0.00302798	0.314657	Smg9	smg-9 homolog, nonsense mediated mRNA decay factor (C. elegans)
FTM	ENSMUSG00000032565	0.636034	0.0446268	0.511707	0.000807018	0.0533479	0.00535649	0.3346	Nudt16	nudix (nucleoside diphosphate linked moiety X)-type motif 16
FTM	ENSMUSG00000091243	0.540794	0.0158572	0.399795	0.000808852	0.0533479	0.00372892	0.322742	Vgll3	vestigial like 3 (Drosophila)
FTM	ENSMUSG00000023341	1.31324	0.0146352	0.392735	0.000815347	0.0534638	0.00694277	0.348758	Mx2	MX dynamin-like GTPase 2
FTM	ENSMUSG00000030380	0.475542	0.00127117	0.239306	0.000820707	0.0534638	0.00689519	0.348758	Mzf1	myeloid zinc finger 1
FTM	ENSMUSG00000040236	0.321832	0.00499573	0.320172	0.000825162	0.0535784	0.00219333	0.302356	Trappc5	trafficking protein particle complex 5
FTM	ENSMUSG00000055067	0.398378	0.0174749	0.409156	0.000831299	0.053828	0.003368	0.318607	Smyd3	SET and MYND domain containing 3
FTM	ENSMUSG00000002015	0.256998	0.00867288	0.351939	0.000839826	0.054042	0.0091495	0.357379	Bcap31	B cell receptor associated protein 31
FTM	ENSMUSG00000002052	0.0505446	0.51081	0.878581	0.0008446	0.054042	0.00674942	0.348171	Supt6	suppressor of Ty 6
FTM	ENSMUSG00000029821	0.71744	0.00673589	0.332793	0.000866083	0.0542256	0.00306807	0.314657	Dfna5	deafness, autosomal dominant 5 (human)
FTM	ENSMUSG00000024436	0.184178	0.0283873	0.457953	0.000899921	0.0548516	0.00329252	0.318607	Mrps18b	mitochondrial ribosomal protein S18B
FTM	ENSMUSG00000049502	0.901865	0.0019038	0.27182	0.000906181	0.0549621	0.00741653	0.351655	Dtx3l	deltex 3-like (Drosophila)
FTM	ENSMUSG00000030722	0.491684	0.00311619	0.292544	0.000929979	0.0553332	0.00370469	0.322742	Nfatc2ip	nuclear factor of activated T cells, cytoplasmic, calcineurin dependent 2 interacting protein
FTM	ENSMUSG00000032743	0.209207	0.0650087	0.547529	0.000963482	0.0556899	0.0113011	0.364982	D430042O09Rik	RIKEN cDNA D430042O09 gene
FTM	ENSMUSG00000035692	1.44716	0.00153737	0.256669	0.000976068	0.0560165	0.0106536	0.363549	Isg15	ISG15 ubiquitin-like modifier
FTM	ENSMUSG00000028454	0.481116	0.00223572	0.276641	0.000990046	0.0562393	0.00319634	0.315622	Pigo	phosphatidylinositol glycan anchor biosynthesis, class O
FTM	ENSMUSG00000079043	0.252833	0.0142355	0.38899	0.000990731	0.0562393	0.0047922	0.331599	Fastkd5	FAST kinase domains 5
FTM	ENSMUSG00000000915	0.557043	0.00960181	0.356244	0.000996723	0.0563928	0.00367413	0.322742	Hip1r	huntingtin interacting protein 1 related
FTM	ENSMUSG00000022706	0.248416	0.0129368	0.379839	0.00103439	0.0568089	0.00741656	0.351655	Mrpl40	mitochondrial ribosomal protein L40
FTM	ENSMUSG00000030074	0.598173	0.0134433	0.384815	0.00106126	0.0569383	0.00560897	0.337798	Gxylt2	glucoside xylosyltransferase 2
FTM	ENSMUSG00000078427	0.177154	0.00248472	0.285196	0.00107688	0.0571679	0.00655937	0.345581	Sarnp	SAP domain containing ribonucleoprotein
FTM	ENSMUSG00000048450	0.827941	0.00330038	0.295166	0.00110828	0.0576434	0.00821695	0.356022	Msx1	msh homeobox 1
FTM	ENSMUSG00000028920	0.228021	0.0316417	0.469173	0.00115379	0.058344	0.00499001	0.331599	Fbxo42	F-box protein 42
FTM	ENSMUSG00000039253	0.383834	0.0107118	0.364621	0.00116655	0.058344	0.00375017	0.322742	Fn3krp	fructosamine 3 kinase related protein
FTM	ENSMUSG00000030752	0.386552	0.0412747	0.501232	0.00121133	0.0585295	0.0147355	0.388908	Kdm8	lysine (K)-specific demethylase 8
FTM	ENSMUSG00000025357	0.25786	0.0146283	0.392735	0.00122089	0.0585295	0.00959069	0.357379	Dgka	diacylglycerol kinase, alpha
FTM	ENSMUSG00000061778	0.288212	0.00199961	0.272301	0.00122173	0.0585295	0.0108399	0.363797	Mospd2	motile sperm domain containing 2
FTM	ENSMUSG00000036606	0.278085	0.00204599	0.272301	0.00125595	0.0589938	0.0074645	0.351655	Plxnb2	plexin B2
FTM	ENSMUSG00000020629	0.426085	0.0263996	0.448756	0.0012695	0.0589938	0.00503764	0.331599	Adi1	acireductone dioxygenase 1
FTM	ENSMUSG00000031913	0.139443	0.00906973	0.351939	0.00127188	0.0589938	0.0072314	0.350865	Vps4a	vacuolar protein sorting 4a (yeast)
FTM	ENSMUSG00000025232	0.342093	0.0056405	0.323851	0.00128294	0.0589938	0.00503507	0.331599	Hexa	hexosaminidase A
FTM	ENSMUSG00000034761	0.236909	0.00360314	0.298946	0.00128297	0.0589938	0.00405601	0.322742	Map4k5	mitogen-activated protein kinase kinase kinase kinase 5
FTM	ENSMUSG00000031310	0.305913	0.00520352	0.320173	0.00129788	0.0590617	0.00475857	0.331599	Zmym3	zinc finger, MYM-type 3
FTM	ENSMUSG00000022574	0.728679	0.0072635	0.336277	0.00131555	0.0592693	0.00486336	0.331599	Naprt	nicotinate phosphoribosyltransferase
FTM	ENSMUSG00000073609	0.354151	0.00334355	0.295166	0.00139339	0.0603588	0.00411561	0.323682	D2hgdh	D-2-hydroxyglutarate dehydrogenase
FTM	ENSMUSG00000022707	0.381894	0.0168977	0.404726	0.00142056	0.0603588	0.00486823	0.331599	Gbe1	glucan (1,4-alpha-), branching enzyme 1
FTM	ENSMUSG00000030513	0.914655	0.0167644	0.402943	0.00142116	0.0603588	0.00487467	0.331599	Pcsk6	proprotein convertase subtilisin/kexin type 6
FTM	ENSMUSG00000038260	0.512327	0.00357033	0.298946	0.00143018	0.0603773	0.0039625	0.322742	Trpm4	transient receptor potential cation channel, subfamily M, member 4
FTM	ENSMUSG00000022571	0.348871	0.0100073	0.357528	0.00148523	0.0612152	0.00510637	0.331899	Pycrl	pyrroline-5-carboxylate reductase-like
FTM	ENSMUSG00000029033	0.182336	0.00722902	0.335342	0.00149163	0.0612967	0.00512164	0.331899	Acap3	ArfGAP with coiled-coil, ankyrin repeat and PH domains 3
FTM	ENSMUSG00000034154	0.228905	0.021299	0.429987	0.00149765	0.0612967	0.0385107	0.46523	Ino80	INO80 homolog (S. cerevisiae)
FTM	ENSMUSG00000028622	0.16548	0.00633804	0.329267	0.00151371	0.0614124	0.00675124	0.348171	Mrpl37	mitochondrial ribosomal protein L37
FTM	ENSMUSG00000028557	0.214945	0.00595848	0.328602	0.00153212	0.0617386	0.00967944	0.357379	Rnf11	ring finger protein 11
FTM	ENSMUSG00000025925	0.435509	0.0153952	0.398417	0.00153945	0.0618745	0.0242034	0.418322	Terf1	telomeric repeat binding factor 1
FTM	ENSMUSG00000036427	0.259551	0.00455782	0.316162	0.00155318	0.0621584	0.00525637	0.333059	Gpi1	glucose phosphate isomerase 1
FTM	ENSMUSG00000037316	0.291616	0.00298113	0.292544	0.001567	0.0623665	0.00442708	0.330413	Bag4	BCL2-associated athanogene 4
FTM	ENSMUSG00000025871	0.292129	0.0205811	0.42811	0.00159008	0.0625178	0.00727052	0.350865	4833439L19Rik	RIKEN cDNA 4833439L19 gene
FTM	ENSMUSG00000004815	0.276613	0.0136882	0.385478	0.00165087	0.0629306	0.00592603	0.339679	Dgkq	diacylglycerol kinase, theta
FTM	ENSMUSG00000028145	0.48015	0.0647294	0.546924	0.00165338	0.0629306	0.00711338	0.349985	Them4	thioesterase superfamily member 4
FTM	ENSMUSG00000095567	0.206433	0.0144182	0.392542	0.00166382	0.0631431	0.00371052	0.322742	Noc2l	nucleolar complex associated 2 homolog (S. cerevisiae)
FTM	ENSMUSG00000068036	0.384362	0.0050691	0.320172	0.00166997	0.0632231	0.00486949	0.331599	Mllt4	myeloid/lymphoid or mixed-lineage leukemia (trithorax homolog, Drosophila); translocated to, 4
FTM	ENSMUSG00000031217	0.0609593	0.708821	0.937579	0.00167988	0.063386	0.00514511	0.332188	Efnb1	ephrin B1
FTM	ENSMUSG00000036167	0.268218	0.00628272	0.329267	0.00172973	0.063978	0.00565932	0.337827	Pphln1	periphilin 1
FTM	ENSMUSG00000037270	0.258964	0.018671	0.417386	0.00173215	0.063978	0.0171269	0.397961	4932438A13Rik	RIKEN cDNA 4932438A13 gene
FTM	ENSMUSG00000021257	0.346448	0.0114651	0.368125	0.00175223	0.0639872	0.00554856	0.336731	Angel1	angel homolog 1 (Drosophila)
FTM	ENSMUSG00000034640	0.25366	0.0535044	0.53169	0.00175645	0.0639872	0.00783463	0.352972	Tiparp	TCDD-inducible poly(ADP-ribose) polymerase
FTM	ENSMUSG00000032842	0.197885	0.0227542	0.435759	0.00176105	0.0639872	0.0132393	0.378139	Abcc10	ATP-binding cassette, sub-family C (CFTR/MRP), member 10
FTM	ENSMUSG00000028843	0.3228	0.0051945	0.320173	0.00176239	0.0639872	0.010724	0.363666	Sh3bgrl3	SH3 domain binding glutamic acid-rich protein-like 3
FTM	ENSMUSG00000030275	0.438544	0.00540258	0.323475	0.00176663	0.0640097	0.005795	0.339387	Etnk1	ethanolamine kinase 1
FTM	ENSMUSG00000005505	0.188967	0.0269199	0.451825	0.00186562	0.0650931	0.00575395	0.339387	Kbtbd4	kelch repeat and BTB (POZ) domain containing 4
FTM	ENSMUSG00000036931	0.449844	0.00523738	0.320173	0.00190129	0.0654849	0.00519837	0.332973	Nfkbid	nuclear factor of kappa light polypeptide gene enhancer in B cells inhibitor, delta
FTM	ENSMUSG00000030780	0.481069	0.0030377	0.292544	0.00195152	0.0662432	0.00948957	0.357379	BC017158	cDNA sequence BC017158
FTM	ENSMUSG00000017830	0.832759	0.01486	0.394526	0.00196933	0.0664076	0.01716	0.397961	Dhx58	DEXH (Asp-Glu-X-His) box polypeptide 58
FTM	ENSMUSG00000015095	0.227796	0.0151219	0.397135	0.00197446	0.0664076	0.0100044	0.358454	Fbxw5	F-box and WD-40 domain protein 5
FTM	ENSMUSG00000002963	0.230693	0.00484442	0.320172	0.00197799	0.0664076	0.00543712	0.334714	Pnkp	polynucleotide kinase 3'- phosphatase
FTM	ENSMUSG00000027466	0.335919	0.00434472	0.311387	0.00201861	0.0668967	0.0450173	0.482666	Rbck1	RanBP-type and C3HC4-type zinc finger containing 1
FTM	ENSMUSG00000040258	0.747801	0.00756961	0.338247	0.00205229	0.0673738	0.00916059	0.357379	Nxph4	neurexophilin 4
FTM	ENSMUSG00000029345	0.109179	0.0187071	0.417686	0.0020585	0.0674835	0.00671016	0.347632	Tfip11	tuftelin interacting protein 11
FTM	ENSMUSG00000055805	0.718872	0.00720051	0.335342	0.00206112	0.0674951	0.00579375	0.339387	Fmnl1	formin-like 1
FTM	ENSMUSG00000047264	0.436722	0.00622948	0.329267	0.00211232	0.0678033	0.00677133	0.348171	Zfp358	zinc finger protein 358
FTM	ENSMUSG00000072258	0.521557	0.0195045	0.420403	0.00211764	0.0678585	0.00966831	0.357379	Taf1a	TATA box binding protein (Tbp)-associated factor, RNA polymerase I, A
FTM	ENSMUSG00000017677	0.317613	0.00489973	0.320172	0.00217534	0.0680309	0.0172309	0.397961	Wsb1	WD repeat and SOCS box-containing 1
FTM	ENSMUSG00000043241	0.151361	0.0148957	0.39478	0.00221013	0.0683945	0.0164533	0.392879	Upf2	UPF2 regulator of nonsense transcripts homolog (yeast)
FTM	ENSMUSG00000003518	0.549879	0.0153308	0.398112	0.00223355	0.0688017	0.00793507	0.354173	Dusp3	dual specificity phosphatase 3 (vaccinia virus phosphatase VH1-related)
FTM	ENSMUSG00000057614	0.554014	0.0458151	0.515283	0.00224243	0.0688496	0.00627055	0.345056	Gnai1	guanine nucleotide binding protein (G protein), alpha inhibiting 1
FTM	ENSMUSG00000030788	0.238265	0.00635182	0.329267	0.0022563	0.0688775	0.011121	0.363993	Rnf141	ring finger protein 141
FTM	ENSMUSG00000037605	1.24509	0.0028489	0.288236	0.0022647	0.0688775	0.0166601	0.395245	Adgrl3	adhesion G protein-coupled receptor L3
FTM	ENSMUSG00000022095	0.135623	0.0481472	0.521739	0.00228522	0.0691235	0.00623297	0.345056	Fam160b2	family with sequence similarity 160, member B2
FTM	ENSMUSG00000034274	0.3003	0.00379061	0.301611	0.00232118	0.0696281	0.0212364	0.413463	Thoc5	THO complex 5
FTM	ENSMUSG00000035504	0.826855	0.00506569	0.320172	0.00233398	0.0697001	0.00712836	0.350014	Reep6	receptor accessory protein 6
FTM	ENSMUSG00000034538	0.707432	0.00915017	0.352962	0.00233726	0.069722	0.045149	0.482806	Zfp418	zinc finger protein 418
FTM	ENSMUSG00000009291	0.261036	0.00845175	0.348853	0.00236038	0.0700229	0.0214983	0.413779	Pttg1ip	pituitary tumor-transforming 1 interacting protein
FTM	ENSMUSG00000036561	0.237785	0.0107184	0.364621	0.0024335	0.0708934	0.0150066	0.389542	Ppp6r2	protein phosphatase 6, regulatory subunit 2
FTM	ENSMUSG00000030966	0.315256	0.0082554	0.347578	0.00243384	0.0708934	0.0103797	0.361656	Trim21	tripartite motif-containing 21
FTM	ENSMUSG00000004661	0.319889	0.034528	0.478552	0.00257507	0.0719713	0.0200112	0.409692	Arid3b	AT rich interactive domain 3B (BRIGHT-like)
FTM	ENSMUSG00000029034	0.238899	0.00398415	0.307976	0.00257782	0.0719713	0.00685872	0.348758	Cpsf3l	cleavage and polyadenylation specific factor 3-like
FTM	ENSMUSG00000049047	0.323172	0.0125633	0.375823	0.00264545	0.072756	0.00776045	0.352572	Armcx3	armadillo repeat containing, X-linked 3
FTM	ENSMUSG00000038884	0.440482	0.0078561	0.342124	0.00266162	0.0728203	0.0161379	0.390111	A230050P20Rik	RIKEN cDNA A230050P20 gene
FTM	ENSMUSG00000060279	0.0933663	0.103763	0.609179	0.00266959	0.0728203	0.00862143	0.35606	Ap2a1	adaptor-related protein complex 2, alpha 1 subunit
FTM	ENSMUSG00000062929	0.225144	0.0473452	0.520679	0.0026846	0.073079	0.00937306	0.357379	Cfl2	cofilin 2, muscle
FTM	ENSMUSG00000036686	0.124395	0.00971357	0.35681	0.00269509	0.073079	0.011791	0.368795	Cc2d1a	coiled-coil and C2 domain containing 1A
FTM	ENSMUSG00000030815	0.274494	0.00688027	0.335342	0.00271481	0.0732452	0.00823853	0.356022	Phkg2	phosphorylase kinase, gamma 2 (testis)
FTM	ENSMUSG00000037887	0.387144	0.0421266	0.503461	0.00276184	0.0736256	0.0153808	0.389542	Dusp8	dual specificity phosphatase 8
FTM	ENSMUSG00000022802	0.600649	0.00826507	0.347674	0.0027912	0.0737382	0.018927	0.407587	Lmln	leishmanolysin-like (metallopeptidase M8 family)
FTM	ENSMUSG00000039774	0.414124	0.0185195	0.416777	0.00281495	0.073867	0.00853635	0.35606	Galnt12	UDP-N-acetyl-alpha-D-galactosamine:polypeptide N-acetylgalactosaminyltransferase 12
FTM	ENSMUSG00000035062	0.348457	0.0179634	0.412757	0.00282745	0.0739425	0.0106291	0.363549	Zc4h2	zinc finger, C4H2 domain containing
FTM	ENSMUSG00000024668	0.298088	0.0329218	0.474666	0.00288466	0.0744888	0.0077446	0.352572	Sdhaf2	succinate dehydrogenase complex assembly factor 2
FTM	ENSMUSG00000056917	0.272102	0.00561576	0.323475	0.00295787	0.0753777	0.00715861	0.350187	Sipa1	signal-induced proliferation associated gene 1
FTM	ENSMUSG00000066191	0.258979	0.0124734	0.375823	0.00298851	0.0756718	0.00943578	0.357379	Anks6	ankyrin repeat and sterile alpha motif domain containing 6
FTM	ENSMUSG00000001552	0.414852	0.00523585	0.320173	0.00306355	0.0764178	0.0100858	0.358793	Jup	junction plakoglobin
FTM	ENSMUSG00000026782	0.34042	0.0296533	0.463791	0.00311196	0.0769568	0.00971682	0.357379	Abi2	abl-interactor 2
FTM	ENSMUSG00000054934	0.944094	0.0118497	0.373628	0.00313402	0.0770297	0.00889569	0.357141	Kcnmb4	potassium large conductance calcium-activated channel, subfamily M, beta member 4
FTM	ENSMUSG00000036450	0.321022	0.0310838	0.466737	0.00316493	0.0774246	0.0085793	0.35606	Hif1an	hypoxia-inducible factor 1, alpha subunit inhibitor
FTM	ENSMUSG00000025384	0.481527	0.0060367	0.329267	0.00319597	0.0775372	0.0112547	0.364982	Faap100	Fanconi anemia core complex associated protein 100
FTM	ENSMUSG00000048920	0.151549	0.0630815	0.544313	0.00324471	0.0779146	0.00862429	0.35606	Fkrp	fukutin related protein
FTM	ENSMUSG00000054008	0.131259	0.232804	0.736931	0.00326402	0.0782281	0.0129221	0.374958	Ndst1	N-deacetylase/N-sulfotransferase (heparan glucosaminyl) 1
FTM	ENSMUSG00000004626	0.404273	0.0326916	0.473705	0.00330735	0.0787341	0.019103	0.407587	Stxbp2	syntaxin binding protein 2
FTM	ENSMUSG00000026860	0.420357	0.00942727	0.355301	0.00333078	0.0788408	0.0170957	0.3977	Sh3glb2	SH3-domain GRB2-like endophilin B2
FTM	ENSMUSG00000025314	0.552181	0.0258028	0.448756	0.00333083	0.0788408	0.00951889	0.357379	Ptprj	protein tyrosine phosphatase, receptor type, J
FTM	ENSMUSG00000039278	1.30901	0.0240465	0.44145	0.00337735	0.079394	0.0189069	0.407587	Pcsk1n	proprotein convertase subtilisin/kexin type 1 inhibitor
FTM	ENSMUSG00000039233	0.16061	0.0716837	0.558705	0.00338634	0.0794251	0.010865	0.363797	Tbce	tubulin-specific chaperone E
FTM	ENSMUSG00000044876	0.236903	0.0145324	0.392735	0.00342217	0.0795384	0.00783229	0.352972	Zfp444	zinc finger protein 444
FTM	ENSMUSG00000036775	0.458219	0.0281857	0.457161	0.00342387	0.0795384	0.00897609	0.357379	Decr2	2-4-dienoyl-Coenzyme A reductase 2, peroxisomal
FTM	ENSMUSG00000036893	0.0837106	0.226073	0.732455	0.00344221	0.0797604	0.0157914	0.389542	Ehmt1	euchromatic histone methyltransferase 1
FTM	ENSMUSG00000006782	0.597481	0.00521273	0.320173	0.00344394	0.0797612	0.0147544	0.388908	Cnp	2',3'-cyclic nucleotide 3' phosphodiesterase
FTM	ENSMUSG00000035521	0.366939	0.0234931	0.438622	0.00345244	0.0798397	0.00688388	0.348758	Gnptg	N-acetylglucosamine-1-phosphotransferase, gamma subunit
FTM	ENSMUSG00000027430	0.127191	0.314383	0.787425	0.00349263	0.0802762	0.0123967	0.372856	Dtd1	D-tyrosyl-tRNA deacylase 1
FTM	ENSMUSG00000079109	0.242403	0.0917953	0.592266	0.0034997	0.0802762	0.00975347	0.357379	Pms2	postmeiotic segregation increased 2 (S. cerevisiae)
FTM	ENSMUSG00000023809	0.449263	0.0114334	0.368125	0.00350607	0.0802762	0.0153428	0.389542	Rps6ka2	ribosomal protein S6 kinase, polypeptide 2
FTM	ENSMUSG00000042505	0.440039	0.0116514	0.37058	0.00353837	0.0806062	0.00853105	0.35606	Sdhaf3	succinate dehydrogenase complex assembly factor 3
FTM	ENSMUSG00000039298	0.258009	0.0235849	0.438817	0.0035955	0.0812275	0.0266411	0.429753	Cdk5rap2	CDK5 regulatory subunit associated protein 2
FTM	ENSMUSG00000015126	0.258462	0.0243065	0.44145	0.00364977	0.0814393	0.0117442	0.368731	Tsr3	TSR3 20S rRNA accumulation
FTM	ENSMUSG00000009090	0.155892	0.0148392	0.394526	0.00367795	0.0816557	0.0131435	0.377154	Ap1b1	adaptor protein complex AP-1, beta 1 subunit
FTM	ENSMUSG00000020444	0.274337	0.0118967	0.373731	0.00368434	0.0816888	0.0199316	0.409137	Guk1	guanylate kinase 1
FTM	ENSMUSG00000028889	0.212028	0.0331015	0.474828	0.00369325	0.0817058	0.0203122	0.41057	Yrdc	yrdC domain containing (E.coli)
FTM	ENSMUSG00000039345	0.485758	0.0208228	0.428756	0.00371452	0.081793	0.0284465	0.436127	Mettl22	methyltransferase like 22
FTM	ENSMUSG00000022415	0.418325	0.198463	0.713375	0.00374336	0.0819149	0.0190144	0.407587	Syngr1	synaptogyrin 1
FTM	ENSMUSG00000024219	0.258375	0.00758704	0.338247	0.003746	0.0819149	0.0115924	0.366468	Anks1	ankyrin repeat and SAM domain containing 1
FTM	ENSMUSG00000013160	0.168823	0.00990083	0.356925	0.00378603	0.0819752	0.0193043	0.407587	Atp6v0d1	ATPase, H+ transporting, lysosomal V0 subunit D1
FTM	ENSMUSG00000026917	0.151776	0.0674742	0.553097	0.00379369	0.0819752	0.00705687	0.348758	Wdr5	WD repeat domain 5
FTM	ENSMUSG00000028917	0.305103	0.00581861	0.32602	0.00385061	0.0822416	0.0146465	0.388908	Plekhm2	pleckstrin homology domain containing, family M (with RUN domain) member 2
FTM	ENSMUSG00000029392	0.152325	0.237166	0.739188	0.00391684	0.0825806	0.0086038	0.35606	Rilpl1	Rab interacting lysosomal protein-like 1
FTM	ENSMUSG00000063524	0.273769	0.00907117	0.351939	0.00398523	0.0829989	0.01933	0.407587	Eno1	enolase 1, alpha non-neuron
FTM	ENSMUSG00000033961	0.845024	0.00823343	0.347209	0.00398641	0.0829989	0.0112168	0.364378	Zfp446	zinc finger protein 446
FTM	ENSMUSG00000055137	0.601102	0.0332092	0.475334	0.0039992	0.0831455	0.0132653	0.378139	Sugct	succinyl-CoA glutarate-CoA transferase
FTM	ENSMUSG00000039474	0.374193	0.0333212	0.476039	0.00404553	0.083401	0.0159382	0.389542	Wfs1	Wolfram syndrome 1 homolog (human)
FTM	ENSMUSG00000038039	0.199661	0.0152157	0.397758	0.00404962	0.083401	0.0312521	0.449849	Gcc2	GRIP and coiled-coil domain containing 2
FTM	ENSMUSG00000024118	0.651131	0.0189389	0.417839	0.00412998	0.0839646	0.00914314	0.357379	1600002H07Rik	RIKEN cDNA 1600002H07 gene
FTM	ENSMUSG00000075266	0.540346	0.00623267	0.329267	0.00413669	0.0839646	0.0131793	0.377719	Cenpw	centromere protein W
FTM	ENSMUSG00000022476	0.24649	0.0193065	0.419409	0.00414554	0.0839646	0.0105245	0.363021	Polr3h	polymerase (RNA) III (DNA directed) polypeptide H
FTM	ENSMUSG00000015087	0.222589	0.0605355	0.542895	0.00414755	0.0839646	0.0102719	0.360937	Rabl6	RAB, member RAS oncogene family-like 6
FTM	ENSMUSG00000041346	0.248362	0.0254696	0.446312	0.00417121	0.0839729	0.00960079	0.357379	Wrap53	WD repeat containing, antisense to Trp53
FTM	ENSMUSG00000037012	0.162642	0.0804941	0.57331	0.00418882	0.0840001	0.026399	0.428506	Hk1	hexokinase 1
FTM	ENSMUSG00000031557	0.364118	0.0286058	0.458526	0.00421725	0.0841747	0.0158933	0.389542	Plekha2	pleckstrin homology domain-containing, family A (phosphoinositide binding specific) member 2
FTM	ENSMUSG00000066705	0.854356	0.015293	0.398112	0.00422653	0.0842384	0.0110928	0.363906	Fxyd6	FXYD domain-containing ion transport regulator 6
FTM	ENSMUSG00000039735	0.55396	0.0268848	0.451398	0.004233	0.0842384	0.0150382	0.389542	Fnbp1l	formin binding protein 1-like
FTM	ENSMUSG00000022358	0.532788	0.00710542	0.335342	0.00424933	0.0843844	0.0108654	0.363797	Fbxo32	F-box protein 32
FTM	ENSMUSG00000054408	0.369479	0.0131912	0.383443	0.00426431	0.0845032	0.0105981	0.363549	Spcs3	signal peptidase complex subunit 3 homolog (S. cerevisiae)
FTM	ENSMUSG00000039000	0.168612	0.0071985	0.335342	0.00426677	0.0845162	0.0293322	0.440218	Ube3c	ubiquitin protein ligase E3C
FTM	ENSMUSG00000041278	0.189276	0.0156253	0.398945	0.00428763	0.0845936	0.025156	0.421492	Ttc1	tetratricopeptide repeat domain 1
FTM	ENSMUSG00000001829	0.286681	0.0413355	0.501335	0.00429498	0.0845936	0.0195704	0.409053	Clpb	ClpB caseinolytic peptidase B
FTM	ENSMUSG00000017132	0.138395	0.405541	0.83629	0.00432921	0.0848578	0.0132735	0.378139	Cyth1	cytohesin 1
FTM	ENSMUSG00000020917	0.214873	0.104425	0.609362	0.00434003	0.0848929	0.0117996	0.368795	Acly	ATP citrate lyase
FTM	ENSMUSG00000024384	0.14625	0.11748	0.626076	0.0044087	0.0856445	0.0101072	0.358912	Iws1	IWS1 homolog (S. cerevisiae)
FTM	ENSMUSG00000038895	0.227127	0.00940724	0.355301	0.00442983	0.0857914	0.0292717	0.439808	Zfp653	zinc finger protein 653
FTM	ENSMUSG00000028967	0.602993	0.00977938	0.356925	0.00448718	0.0862902	0.0240441	0.418211	Errfi1	ERBB receptor feedback inhibitor 1
FTM	ENSMUSG00000032175	0.283008	0.0301829	0.463791	0.00449645	0.0864044	0.0218902	0.414201	Tyk2	tyrosine kinase 2
FTM	ENSMUSG00000031955	0.161089	0.220993	0.729229	0.00450315	0.0864205	0.012715	0.373766	Bcar1	breast cancer anti-estrogen resistance 1
FTM	ENSMUSG00000028463	1.04626	0.00901944	0.351939	0.00451215	0.0864937	0.00962431	0.357379	Car9	carbonic anhydrase 9
FTM	ENSMUSG00000037013	0.260999	0.00889116	0.351939	0.004534	0.0866875	0.0345247	0.458471	Ss18	synovial sarcoma translocation, Chromosome 18
FTM	ENSMUSG00000071650	0.20815	0.0170386	0.405823	0.00454207	0.0866875	0.0191338	0.407587	Ganab	alpha glucosidase 2 alpha neutral subunit
FTM	ENSMUSG00000039347	0.569016	0.0346795	0.478572	0.00455739	0.0867234	0.0150868	0.389542	Atp6v0e2	ATPase, H+ transporting, lysosomal V0 subunit E2
FTM	ENSMUSG00000000823	0.197752	0.0146945	0.39289	0.0045689	0.086794	0.0408316	0.468929	Znf512b	zinc finger protein 512B
FTM	ENSMUSG00000026471	0.908385	0.0055298	0.323475	0.00457456	0.0868039	0.0142388	0.384605	Mr1	major histocompatibility complex, class I-related
FTM	ENSMUSG00000002546	0.167549	0.0240733	0.44145	0.00458133	0.0868215	0.0198606	0.409137	Golga2	golgi autoantigen, golgin subfamily a, 2
FTM	ENSMUSG00000025358	0.299869	0.0141507	0.388609	0.00459232	0.0868251	0.0281406	0.435601	Cdk2	cyclin-dependent kinase 2
FTM	ENSMUSG00000040687	0.538845	0.00922714	0.353839	0.00464481	0.0870809	0.0280915	0.435601	Madd	MAP-kinase activating death domain
FTM	ENSMUSG00000091964	0.186474	0.07818	0.569231	0.00467013	0.0873464	0.0165038	0.393288
FTM	ENSMUSG00000034333	0.339103	0.0841789	0.579957	0.00469187	0.0875088	0.00960465	0.357379	Zbed4	zinc finger, BED type containing 4
FTM	ENSMUSG00000026491	0.219841	0.0163299	0.402181	0.00469647	0.0875317	0.0354799	0.459474	Ahctf1	AT hook containing transcription factor 1
FTM	ENSMUSG00000019578	0.180816	0.00861115	0.351939	0.00476599	0.088016	0.0137042	0.381009	Ubxn6	UBX domain protein 6
FTM	ENSMUSG00000059060	0.351581	0.0941625	0.596235	0.00476717	0.088016	0.00982248	0.357379	Rad51b	RAD51 homolog B
FTM	ENSMUSG00000021932	0.229236	0.0228202	0.436196	0.00479902	0.0883181	0.028184	0.435601	Rnaseh2b	ribonuclease H2, subunit B
FTM	ENSMUSG00000021040	0.194419	0.0263202	0.448756	0.00486054	0.0885195	0.0139007	0.381777	Slirp	SRA stem-loop interacting RNA binding protein
FTM	ENSMUSG00000035245	0.311642	0.0952689	0.596479	0.00487864	0.0885195	0.0176275	0.39998	Eogt	EGF domain-specific O-linked N-acetylglucosamine (GlcNAc) transferase
FTM	ENSMUSG00000024472	0.368093	0.0245621	0.442855	0.00489291	0.0885195	0.0348888	0.458564	Dcp2	DCP2 decapping enzyme homolog (S. cerevisiae)
FTM	ENSMUSG00000038518	0.173888	0.0127979	0.378026	0.00489637	0.0885195	0.028705	0.437135	Jarid2	jumonji, AT rich interactive domain 2
FTM	ENSMUSG00000015478	0.141161	0.052068	0.529012	0.00489879	0.0885195	0.0235043	0.417729	Rnf5	ring finger protein 5
FTM	ENSMUSG00000025486	0.33489	0.0192313	0.419382	0.00496061	0.088963	0.0357419	0.46065	Sirt3	sirtuin 3
FTM	ENSMUSG00000036099	0.282755	0.00836826	0.348501	0.00500586	0.0892858	0.0163712	0.392716	Vezt	vezatin, adherens junctions transmembrane protein
FTM	ENSMUSG00000028763	0.240017	0.036164	0.484094	0.00505065	0.0897096	0.0173518	0.397961	Hspg2	perlecan (heparan sulfate proteoglycan 2)
FTM	ENSMUSG00000000568	0.179222	0.0132892	0.383678	0.00506216	0.0897846	0.0162829	0.391799	Hnrnpd	heterogeneous nuclear ribonucleoprotein D
FTM	ENSMUSG00000032115	0.261986	0.0126036	0.375823	0.00511088	0.0900491	0.0151239	0.389542	Hyou1	hypoxia up-regulated 1
FTM	ENSMUSG00000025495	0.211444	0.0222219	0.431694	0.00511416	0.0900491	0.0222653	0.41475	Ptdss2	phosphatidylserine synthase 2
FTM	ENSMUSG00000035237	0.536258	0.0530924	0.53169	0.0051442	0.0901616	0.0113311	0.365091	Lcat	lecithin cholesterol acyltransferase
FTM	ENSMUSG00000032245	0.370369	0.0345427	0.478552	0.00514668	0.0901616	0.0148912	0.389542	Cln6	ceroid-lipofuscinosis, neuronal 6
FTM	ENSMUSG00000029165	0.306708	0.0229839	0.436299	0.00514697	0.0901616	0.0133916	0.379631	Agbl5	ATP/GTP binding protein-like 5
FTM	ENSMUSG00000031103	0.324477	0.0341922	0.477806	0.00516217	0.0901616	0.0160755	0.389606	Elf4	E74-like factor 4 (ets domain transcription factor)
FTM	ENSMUSG00000036879	0.273298	0.0696999	0.556244	0.0052001	0.0902696	0.0137931	0.381774	Phkb	phosphorylase kinase beta
FTM	ENSMUSG00000042116	0.444912	0.0771439	0.568559	0.00520353	0.0902696	0.0208591	0.413369	Vwa1	von Willebrand factor A domain containing 1
FTM	ENSMUSG00000007564	0.0833952	0.0372449	0.489491	0.00521293	0.0902696	0.0129505	0.375052	Ppp2r1a	protein phosphatase 2, regulatory subunit A, alpha
FTM	ENSMUSG00000024131	0.400393	0.0111492	0.367606	0.00524521	0.0903959	0.0114517	0.366405	Slc3a1	solute carrier family 3, member 1
FTM	ENSMUSG00000036022	0.18847	0.254317	0.75087	0.00525262	0.0903959	0.0349046	0.458564	Fam122b	family with sequence similarity 122, member B
FTM	ENSMUSG00000006390	0.170399	0.0210487	0.428818	0.00525392	0.0903959	0.0158517	0.389542	Elovl1	elongation of very long chain fatty acids (FEN1/Elo2, SUR4/Elo3, yeast)-like 1
FTM	ENSMUSG00000032198	0.309361	0.0113031	0.367606	0.00526484	0.090501	0.0134344	0.380154	Dock6	dedicator of cytokinesis 6
FTM	ENSMUSG00000034653	0.219985	0.0329715	0.474692	0.00531376	0.0908997	0.0192128	0.407587	Ythdc2	YTH domain containing 2
FTM	ENSMUSG00000075040	0.558018	0.00895309	0.351939	0.00534496	0.0911771	0.0309488	0.449255	Zfp408	zinc finger protein 408
FTM	ENSMUSG00000038604	0.154911	0.0651882	0.547747	0.00538216	0.091446	0.0217344	0.413779	Fam65a	family with sequence similarity 65, member A
FTM	ENSMUSG00000033009	0.319675	0.0771379	0.568559	0.0054163	0.0917273	0.0151581	0.389542	Ogfod1	2-oxoglutarate and iron-dependent oxygenase domain containing 1
FTM	ENSMUSG00000021171	0.372748	0.0242608	0.44145	0.00542562	0.0917859	0.0173415	0.397961	Esyt2	extended synaptotagmin-like protein 2
FTM	ENSMUSG00000055633	0.278748	0.00791201	0.343053	0.00547452	0.0920619	0.013999	0.381777	Zfp580	zinc finger protein 580
FTM	ENSMUSG00000032514	0.479225	0.104654	0.609362	0.00547528	0.0920619	0.0210171	0.413463	Ttc21a	tetratricopeptide repeat domain 21A
FTM	ENSMUSG00000025008	0.36609	0.0494155	0.525281	0.00556989	0.0924242	0.0430703	0.475687	Tctn3	tectonic family member 3
FTM	ENSMUSG00000033114	0.091464	0.580136	0.903023	0.00557489	0.0924242	0.019358	0.407587	Slc35d2	solute carrier family 35, member D2
FTM	ENSMUSG00000039086	0.332728	0.0158033	0.399078	0.00561953	0.0928399	0.0235074	0.417729	Ss18l1	synovial sarcoma translocation gene on chromosome 18-like 1
FTM	ENSMUSG00000003955	0.307451	0.0157819	0.398945	0.00563607	0.0928446	0.0415796	0.472421	Fam162a	family with sequence similarity 162, member A
FTM	ENSMUSG00000026434	0.160214	0.125035	0.635304	0.0056379	0.0928446	0.0174206	0.397961	Nucks1	nuclear casein kinase and cyclin-dependent kinase substrate 1
FTM	ENSMUSG00000036698	0.250542	0.0714989	0.558488	0.00565322	0.092895	0.0232456	0.417729	Ago2	argonaute RISC catalytic subunit 2
FTM	ENSMUSG00000001964	0.145021	0.135549	0.649199	0.00569679	0.0929467	0.0212915	0.413769	Emd	emerin
FTM	ENSMUSG00000031790	0.549153	0.0263214	0.448756	0.00570332	0.0929467	0.0147388	0.388908	Mmp15	matrix metallopeptidase 15
FTM	ENSMUSG00000045273	0.55216	0.0112159	0.367606	0.00577117	0.093423	0.0135764	0.380504	Cenph	centromere protein H
FTM	ENSMUSG00000038305	0.92547	0.0091704	0.353162	0.00580482	0.093613	0.0155089	0.389542	Spats2l	spermatogenesis associated, serine-rich 2-like
FTM	ENSMUSG00000059323	0.317433	0.181077	0.696204	0.00583301	0.0937158	0.0243608	0.418447	Tonsl	tonsoku-like, DNA repair protein
FTM	ENSMUSG00000060038	0.260776	0.0271175	0.453291	0.005856	0.0937158	0.035655	0.459842	Dhps	deoxyhypusine synthase
FTM	ENSMUSG00000021774	0.08788	0.20094	0.715009	0.00586591	0.0937642	0.0121629	0.370843	Ube2e1	ubiquitin-conjugating enzyme E2E 1
FTM	ENSMUSG00000028636	0.180739	0.0347736	0.478572	0.00594569	0.094521	0.0159112	0.389542	Ppcs	phosphopantothenoylcysteine synthetase
FTM	ENSMUSG00000021275	0.295279	0.0440076	0.509646	0.00597178	0.0946984	0.016492	0.393288	Tecpr2	tectonin beta-propeller repeat containing 2
FTM	ENSMUSG00000028086	0.292946	0.0172708	0.407058	0.00597982	0.0946984	0.0446606	0.48194	Fbxw7	F-box and WD-40 domain protein 7
FTM	ENSMUSG00000036202	0.249276	0.0225293	0.434297	0.00598237	0.0946984	0.0220365	0.41455	Rif1	Rap1 interacting factor 1 homolog (yeast)
FTM	ENSMUSG00000028453	0.481119	0.0161023	0.401214	0.00601482	0.0949129	0.014535	0.387697	Fancg	Fanconi anemia, complementation group G
FTM	ENSMUSG00000029538	0.217518	0.0587742	0.540975	0.00603201	0.0950882	0.0132479	0.378139	Srsf9	serine/arginine-rich splicing factor 9
FTM	ENSMUSG00000041718	0.334166	0.0261198	0.448756	0.00608265	0.0955017	0.0201307	0.41016	Alg13	asparagine-linked glycosylation 13
FTM	ENSMUSG00000030590	0.440806	0.0120063	0.374288	0.00612034	0.0955116	0.0158769	0.389542	Fam98c	family with sequence similarity 98, member C
FTM	ENSMUSG00000040321	0.262938	0.0908534	0.590946	0.00619325	0.0958062	0.0215708	0.413779	Zfp770	zinc finger protein 770
FTM	ENSMUSG00000026116	0.148952	0.0565199	0.538728	0.00619895	0.0958425	0.015747	0.389542	Tmem131	transmembrane protein 131
FTM	ENSMUSG00000038888	0.447464	0.00925469	0.353839	0.00636486	0.0970754	0.0161828	0.390536	Ctu1	cytosolic thiouridylase subunit 1 homolog (S. pombe)
FTM	ENSMUSG00000035314	0.505894	0.0282826	0.457161	0.00637165	0.0971063	0.0343128	0.45793	Gdpd5	glycerophosphodiester phosphodiesterase domain containing 5
FTM	ENSMUSG00000030401	0.450476	0.0194945	0.420403	0.00645236	0.0972099	0.0180491	0.403675	Rtn2	reticulon 2 (Z-band associated protein)
FTM	ENSMUSG00000042744	0.194998	0.0457147	0.514952	0.00646407	0.0973239	0.0360626	0.460883	Gm15800	predicted gene 15800
FTM	ENSMUSG00000025173	0.130674	0.0096838	0.356671	0.00652074	0.0979258	0.0162516	0.391247	Wdr45b	WD repeat domain 45B
FTM	ENSMUSG00000032606	0.210214	0.0764271	0.567971	0.00655158	0.0980115	0.0306228	0.447428	Nicn1	nicolin 1
FTM	ENSMUSG00000033735	0.24216	0.204606	0.717729	0.00655399	0.0980115	0.016303	0.391915	Spr	sepiapterin reductase
FTM	ENSMUSG00000020163	0.234502	0.172664	0.686167	0.00658558	0.098084	0.020904	0.413369	Uqcr11	ubiquinol-cytochrome c reductase, complex III subunit XI
FTM	ENSMUSG00000029664	1.06211	0.010107	0.358257	0.00666427	0.0984955	0.0211127	0.413463	Tfpi2	tissue factor pathway inhibitor 2
FTM	ENSMUSG00000035545	0.140784	0.0304363	0.464564	0.00672541	0.0987813	0.0275343	0.433691	Leng8	leukocyte receptor cluster (LRC) member 8
FTM	ENSMUSG00000047153	0.362657	0.0282129	0.457161	0.00674692	0.0988669	0.0279635	0.435425	Khnyn	KH and NYN domain containing
FTM	ENSMUSG00000033707	0.368138	0.079007	0.57062	0.00678619	0.099091	0.0466765	0.486615	Lrrc24	leucine rich repeat containing 24
FTM	ENSMUSG00000001855	0.105434	0.0246364	0.442855	0.00684107	0.0992834	0.0183067	0.404149	Nup214	nucleoporin 214
FTM	ENSMUSG00000030357	0.389972	0.025913	0.448756	0.00690347	0.0995551	0.0300367	0.444393	Fkbp4	FK506 binding protein 4
FTM	ENSMUSG00000028672	0.234258	0.0212164	0.429869	0.00693212	0.0995551	0.0198275	0.409137	Hmgcl	3-hydroxy-3-methylglutaryl-Coenzyme A lyase
FTM	ENSMUSG00000023330	0.359391	0.0364373	0.485295	0.00700575	0.100061	0.0284195	0.435998	Dtwd1	DTW domain containing 1
FTM	ENSMUSG00000032939	0.161645	0.137442	0.65146	0.00701843	0.100061	0.0182042	0.404149	Nup93	nucleoporin 93
FTM	ENSMUSG00000024997	0.158854	0.0376265	0.489843	0.00711686	0.100517	0.0215092	0.413779	Prdx3	peroxiredoxin 3
FTM	ENSMUSG00000028684	0.172897	0.0334172	0.476401	0.00716219	0.100667	0.0173095	0.397961	Urod	uroporphyrinogen decarboxylase
FTM	ENSMUSG00000021493	0.254872	0.03471	0.478572	0.00718226	0.100829	0.0217814	0.413967	Pdlim7	PDZ and LIM domain 7
FTM	ENSMUSG00000036693	0.272116	0.0236636	0.438817	0.00718484	0.100829	0.0420922	0.473185	Nop14	NOP14 nucleolar protein
FTM	ENSMUSG00000048550	0.579275	0.0250997	0.444732	0.0072148	0.101081	0.0392014	0.465688	Thnsl1	threonine synthase-like 1 (bacterial)
FTM	ENSMUSG00000029725	0.329114	0.0243217	0.44145	0.00732727	0.101584	0.0212186	0.413463	Ppp1r35	protein phosphatase 1, regulatory subunit 35
FTM	ENSMUSG00000060098	0.159984	0.0297587	0.463791	0.0073303	0.101584	0.0210924	0.413463	Prmt7	protein arginine N-methyltransferase 7
FTM	ENSMUSG00000001150	0.180948	0.0321587	0.47172	0.00736679	0.101806	0.0240823	0.418257	Mcm3ap	minichromosome maintenance deficient 3 (S. cerevisiae) associated protein
FTM	ENSMUSG00000024736	0.249363	0.0181675	0.414218	0.00737623	0.101822	0.035422	0.459301	Tmem132a	transmembrane protein 132A
FTM	ENSMUSG00000030534	0.162963	0.0303606	0.463957	0.00738746	0.101822	0.0320015	0.453116	Vps33b	vacuolar protein sorting 33B (yeast)
FTM	ENSMUSG00000026102	0.343847	0.0466856	0.518516	0.00749127	0.102381	0.0477396	0.487646	Inpp1	inositol polyphosphate-1-phosphatase
FTM	ENSMUSG00000034022	0.144853	0.142446	0.656544	0.00750049	0.102429	0.0178029	0.401895	Cpsf1	cleavage and polyadenylation specific factor 1
FTM	ENSMUSG00000003308	0.14157	0.139729	0.65447	0.00754861	0.10264	0.0234088	0.417729	Keap1	kelch-like ECH-associated protein 1
FTM	ENSMUSG00000048279	0.385259	0.0407106	0.498867	0.00756613	0.102657	0.0251804	0.421492	Sacs	sacsin
FTM	ENSMUSG00000021703	0.448135	0.15587	0.67048	0.00767144	0.103037	0.0495185	0.491964	Serinc5	serine incorporator 5
FTM	ENSMUSG00000038777	0.308404	0.0394617	0.496657	0.00770295	0.103037	0.0226621	0.416388	Sema6c	sema domain, transmembrane domain (TM), and cytoplasmic domain, (semaphorin) 6C
FTM	ENSMUSG00000026447	0.907389	0.0176157	0.409901	0.00773121	0.103037	0.0217375	0.413779	Pik3c2b	phosphoinositide-3-kinase, class 2, beta polypeptide
FTM	ENSMUSG00000019863	0.17166	0.0407284	0.498895	0.00773551	0.103037	0.0330989	0.456142	Qrsl1	glutaminyl-tRNA synthase (glutamine-hydrolyzing)-like 1
FTM	ENSMUSG00000022297	0.568841	0.105958	0.610186	0.00773568	0.103037	0.0349563	0.458564	Fzd6	frizzled homolog 6 (Drosophila)
FTM	ENSMUSG00000027239	0.909856	0.0207417	0.428756	0.00780082	0.103392	0.0209747	0.413463	Mdk	midkine
FTM	ENSMUSG00000056366	0.866106	0.0812048	0.57482	0.00781578	0.103461	0.0223921	0.414852	Fabp3-ps1	fatty acid binding protein 3, muscle and heart, pseudogene 1
FTM	ENSMUSG00000030522	0.210701	0.130085	0.643259	0.00788469	0.103677	0.0242791	0.418447	Mtmr10	myotubularin related protein 10
FTM	ENSMUSG00000026853	0.303375	0.0396725	0.497443	0.00788879	0.103677	0.0193561	0.407587	Crat	carnitine acetyltransferase
FTM	ENSMUSG00000062480	0.353913	0.0586058	0.540771	0.00790578	0.103699	0.0201581	0.41016	Acat3	acetyl-Coenzyme A acetyltransferase 3
FTM	ENSMUSG00000078566	0.373133	0.119724	0.629176	0.0079163	0.103715	0.0195516	0.409053	Bnip3	BCL2/adenovirus E1B interacting protein 3
FTM	ENSMUSG00000022428	0.169466	0.114899	0.62271	0.00794656	0.103769	0.0407873	0.468929	Cby1	chibby homolog 1 (Drosophila)
FTM	ENSMUSG00000049624	0.394355	0.0460194	0.5154	0.00796704	0.103801	0.0368087	0.46257	Slc17a5	solute carrier family 17 (anion/sugar transporter), member 5
FTM	ENSMUSG00000087687	0.198117	0.0222036	0.431694	0.00806755	0.104104	0.0221709	0.41455	Pet100	PET100 homolog (S. cerevisiae)
FTM	ENSMUSG00000021265	0.442158	0.0192492	0.419382	0.00814539	0.104481	0.0213809	0.413779	Slc25a29	solute carrier family 25 (mitochondrial carrier, palmitoylcarnitine transporter), member 29
FTM	ENSMUSG00000026796	0.168287	0.0186633	0.417386	0.00815472	0.104481	0.0203806	0.411118	Fam129b	family with sequence similarity 129, member B
FTM	ENSMUSG00000020728	0.239114	0.0478627	0.521214	0.00819734	0.104685	0.0421413	0.473392	Cep112	centrosomal protein 112
FTM	ENSMUSG00000030967	0.262806	0.0120072	0.374288	0.00823296	0.104753	0.0476736	0.487646	Zranb1	zinc finger, RAN-binding domain containing 1
FTM	ENSMUSG00000034586	1.05663	0.0610929	0.543142	0.00825989	0.104753	0.0396456	0.46634	Hid1	HID1 domain containing
FTM	ENSMUSG00000067825	0.413503	0.0123518	0.375554	0.00828636	0.104796	0.0210432	0.413463	Pex26	peroxisomal biogenesis factor 26
FTM	ENSMUSG00000032875	0.238669	0.0287941	0.459307	0.00829622	0.104892	0.0234885	0.417729	Arhgef17	Rho guanine nucleotide exchange factor (GEF) 17
FTM	ENSMUSG00000025733	0.234876	0.0228922	0.436196	0.00849532	0.105406	0.017319	0.397961	Rhot2	ras homolog gene family, member T2
FTM	ENSMUSG00000001143	0.278798	0.0150912	0.397117	0.00862414	0.105933	0.0206056	0.413035	Lman2l	lectin, mannose-binding 2-like
FTM	ENSMUSG00000034247	0.139782	0.0518426	0.528539	0.00868523	0.105975	0.0249857	0.420525	Plekhm1	pleckstrin homology domain containing, family M (with RUN domain) member 1
FTM	ENSMUSG00000028187	0.158058	0.0865533	0.583852	0.00869082	0.105975	0.0380887	0.463972	Rpf1	ribosome production factor 1 homolog (S. cerevisiae)
FTM	ENSMUSG00000032826	0.328587	0.029979	0.463791	0.00870712	0.105975	0.0327346	0.454718	Ank2	ankyrin 2, brain
FTM	ENSMUSG00000027274	0.176487	0.358307	0.809785	0.00871038	0.105975	0.0268858	0.431256	Mkks	McKusick-Kaufman syndrome
FTM	ENSMUSG00000027615	0.251229	0.0477804	0.521214	0.00875525	0.106121	0.0196911	0.409137	Hps3	Hermansky-Pudlak syndrome 3 homolog (human)
FTM	ENSMUSG00000068699	0.427322	0.0416045	0.50249	0.00880339	0.106138	0.0231511	0.417729	Flnc	filamin C, gamma
FTM	ENSMUSG00000052751	0.116317	0.477573	0.865768	0.00881363	0.106138	0.0192976	0.407587	Repin1	replication initiator 1
FTM	ENSMUSG00000050174	0.330431	0.0226805	0.435183	0.0088216	0.106138	0.0411186	0.470234	Nudt6	nudix (nucleoside diphosphate linked moiety X)-type motif 6
FTM	ENSMUSG00000040859	0.109695	0.0179763	0.412757	0.00894014	0.106793	0.0216626	0.413779	Bsdc1	BSD domain containing 1
FTM	ENSMUSG00000005465	0.416157	0.446416	0.854796	0.00896962	0.106828	0.0253995	0.422304	Il27ra	interleukin 27 receptor, alpha
FTM	ENSMUSG00000032508	0.304628	0.021375	0.429987	0.00899547	0.106828	0.0468155	0.486615	Myd88	myeloid differentiation primary response gene 88
FTM	ENSMUSG00000022463	0.153188	0.306319	0.783085	0.00902997	0.10694	0.0198282	0.409137	Srebf2	sterol regulatory element binding factor 2
FTM	ENSMUSG00000063317	0.352593	0.0699972	0.55642	0.00904646	0.106951	0.0311155	0.449808	Usp31	ubiquitin specific peptidase 31
FTM	ENSMUSG00000024939	0.110556	0.171259	0.684351	0.00904803	0.106951	0.0359109	0.460799	Fam89b	family with sequence similarity 89, member B
FTM	ENSMUSG00000037151	0.342244	0.0577226	0.540644	0.00909097	0.107128	0.0243488	0.418447	Lrrc20	leucine rich repeat containing 20
FTM	ENSMUSG00000033031	0.370711	0.0247034	0.442855	0.00914486	0.107392	0.0351467	0.458626	C330027C09Rik	RIKEN cDNA C330027C09 gene
FTM	ENSMUSG00000068744	0.526506	0.0534496	0.53169	0.00915623	0.10746	0.0467968	0.486615	Psrc1	proline/serine-rich coiled-coil 1
FTM	ENSMUSG00000040158	0.192105	0.029984	0.463791	0.00916678	0.107503	0.0193014	0.407587	Tax1bp3	Tax1 (human T cell leukemia virus type I) binding protein 3
FTM	ENSMUSG00000079508	0.0831261	0.297657	0.777637	0.00929533	0.108146	0.0240383	0.418211	Apoo	apolipoprotein O
FTM	ENSMUSG00000043262	0.331476	0.0242852	0.44145	0.00954733	0.109227	0.0277431	0.43412	Uevld	UEV and lactate/malate dehyrogenase domains
FTM	ENSMUSG00000032705	0.107057	0.376885	0.82068	0.00954836	0.109227	0.0425101	0.474641	Exd2	exonuclease 3'-5' domain containing 2
FTM	ENSMUSG00000038507	0.387719	0.0567926	0.539047	0.00956165	0.109241	0.0430606	0.475687	Parp12	poly (ADP-ribose) polymerase family, member 12
FTM	ENSMUSG00000039577	0.455514	0.0188337	0.417759	0.00958192	0.10926	0.0242702	0.418447	Nphp4	nephronophthisis 4 (juvenile) homolog (human)
FTM	ENSMUSG00000060216	0.310411	0.0474098	0.520679	0.00972223	0.109951	0.0264068	0.428506	Arrb2	arrestin, beta 2
FTM	ENSMUSG00000033985	0.16907	0.079349	0.571278	0.00974021	0.110065	0.0259167	0.425715	Tesk2	testis-specific kinase 2
FTM	ENSMUSG00000028840	0.269876	0.026258	0.448756	0.0099591	0.110908	0.0286728	0.437135	Zfp593	zinc finger protein 593
FTM	ENSMUSG00000007656	-0.446025	0.000350603	0.180154	2.82574e-06	0.0122897	6.46192e-05	0.182564	Arpp19	cAMP-regulated phosphoprotein 19
FTM	ENSMUSG00000027822	-0.370518	1.38681e-05	0.0723378	3.97676e-06	0.0155574	4.62249e-05	0.182564	Slc33a1	solute carrier family 33 (acetyl-CoA transporter), member 1
FTM	ENSMUSG00000029617	-0.228834	0.000770744	0.215408	1.28246e-05	0.0231558	0.000102209	0.231034	Ccz1	CCZ1 vacuolar protein trafficking and biogenesis associated
FTM	ENSMUSG00000024050	-0.135158	0.000843638	0.217608	1.64946e-05	0.0246442	0.000149797	0.231034	Wiz	widely-interspaced zinc finger motifs
FTM	ENSMUSG00000024253	-0.539592	0.000377043	0.180154	2.56404e-05	0.0273565	9.25499e-05	0.228671	Dync2li1	dynein cytoplasmic 2 light intermediate chain 1
FTM	ENSMUSG00000030314	-0.293613	0.00299953	0.292544	3.5076e-05	0.0283904	0.000426262	0.231034	Atg7	autophagy related 7
FTM	ENSMUSG00000048897	-0.395369	6.71206e-05	0.127827	3.91432e-05	0.0287501	0.000514127	0.231132	Zfp710	zinc finger protein 710
FTM	ENSMUSG00000021501	-0.189308	0.00204818	0.272301	4.7414e-05	0.029522	0.000248817	0.231034	Caml	calcium modulating ligand
FTM	ENSMUSG00000021748	-0.206123	0.000181422	0.154852	4.77598e-05	0.029522	0.00017234	0.231034	Pdhb	pyruvate dehydrogenase (lipoamide) beta
FTM	ENSMUSG00000062397	-0.244906	0.00137101	0.246336	5.30794e-05	0.0317868	0.00044501	0.231034	Zfp706	zinc finger protein 706
FTM	ENSMUSG00000001157	-0.463992	0.000228519	0.170283	5.69115e-05	0.0317868	0.000502079	0.231132	Gmcl1	germ cell-less homolog 1 (Drosophila)
FTM	ENSMUSG00000024978	-0.444318	0.000185018	0.155101	5.76337e-05	0.0317868	0.000857845	0.254225	Gpam	glycerol-3-phosphate acyltransferase, mitochondrial
FTM	ENSMUSG00000022656	-0.447126	0.000161528	0.148685	5.96669e-05	0.0317868	0.000238478	0.231034	Pvrl3	poliovirus receptor-related 3
FTM	ENSMUSG00000011958	-0.369258	0.000314265	0.177749	7.54188e-05	0.0324455	0.0003548	0.231034	Bnip2	BCL2/adenovirus E1B interacting protein 2
FTM	ENSMUSG00000020923	-0.24014	0.000215946	0.169084	7.72789e-05	0.0324455	0.000361014	0.231034	Ubtf	upstream binding transcription factor, RNA polymerase I
FTM	ENSMUSG00000022043	-0.752177	0.000471408	0.191387	7.82389e-05	0.0324455	0.000511863	0.231132	Trim35	tripartite motif-containing 35
FTM	ENSMUSG00000027010	-0.317615	0.00034912	0.180154	7.89721e-05	0.0324455	0.000430156	0.231034	Slc25a12	solute carrier family 25 (mitochondrial carrier, Aralar), member 12
FTM	ENSMUSG00000073563	-0.366546	0.000226409	0.170283	8.22347e-05	0.0324455	0.000456117	0.231034	Csnk1g3	casein kinase 1, gamma 3
FTM	ENSMUSG00000023348	-0.214152	0.000119812	0.144219	8.75722e-05	0.0324455	0.000924344	0.254318	Trip6	thyroid hormone receptor interactor 6
FTM	ENSMUSG00000021477	-0.727115	0.00135797	0.246336	9.44209e-05	0.0324457	0.000431288	0.231034	Ctsl	cathepsin L
FTM	ENSMUSG00000036955	-0.389321	0.00260817	0.286941	0.000109977	0.0339017	0.00045738	0.231034	Kif1bp	KIF1 binding protein
FTM	ENSMUSG00000020265	-0.293609	0.000310674	0.177749	0.000115662	0.0339017	0.000743758	0.247943	Sumo3	small ubiquitin-like modifier 3
FTM	ENSMUSG00000003032	-0.643438	0.000312443	0.177749	0.000132779	0.0341287	0.000643298	0.238146	Klf4	Kruppel-like factor 4 (gut)
FTM	ENSMUSG00000020097	-0.437463	0.0146146	0.392735	0.000132889	0.0341287	0.000697585	0.240795	Sgpl1	sphingosine phosphate lyase 1
FTM	ENSMUSG00000031299	-0.277122	0.0405299	0.498619	0.000135847	0.0341287	0.002096	0.302102	Pdha1	pyruvate dehydrogenase E1 alpha 1
FTM	ENSMUSG00000020029	-0.585477	0.000193284	0.159188	0.000145059	0.0342316	0.000604858	0.238146	Nudt4	nudix (nucleoside diphosphate linked moiety X)-type motif 4
FTM	ENSMUSG00000074886	-0.298884	0.0051282	0.320173	0.000148509	0.0344497	0.00812484	0.355751	Grk6	G protein-coupled receptor kinase 6
FTM	ENSMUSG00000030659	-0.324831	0.087873	0.586866	0.000149944	0.0345055	0.000825006	0.254225	Nucb2	nucleobindin 2
FTM	ENSMUSG00000032435	-0.258382	0.000358686	0.180154	0.000170066	0.0361256	0.00114595	0.257482	Dync1li1	dynein cytoplasmic 1 light intermediate chain 1
FTM	ENSMUSG00000009828	-0.349074	0.0165525	0.402807	0.000173585	0.0361768	0.000651681	0.238146	Ick	intestinal cell kinase
FTM	ENSMUSG00000041959	-0.575614	0.000912922	0.2262	0.000177247	0.0365585	0.00187775	0.297613	S100a10	S100 calcium binding protein A10 (calpactin)
FTM	ENSMUSG00000002319	-0.266268	0.0108322	0.36586	0.000181876	0.0368024	0.000881021	0.254225	Ipo4	importin 4
FTM	ENSMUSG00000038215	-0.592634	0.00373021	0.300352	0.000197334	0.0369805	0.00303067	0.314657	Cep44	centrosomal protein 44
FTM	ENSMUSG00000031534	-0.379127	0.00313099	0.292544	0.000205431	0.0369805	0.00457884	0.331599	Smim19	small integral membrane protein 19
FTM	ENSMUSG00000035949	-0.240048	0.000884739	0.223597	0.000209422	0.0370322	0.000877561	0.254225	Fbxw2	F-box and WD-40 domain protein 2
FTM	ENSMUSG00000049119	-0.60522	0.00268996	0.286941	0.000221183	0.0373505	0.000890121	0.254225	Fam110b	family with sequence similarity 110, member B
FTM	ENSMUSG00000020888	-0.167803	0.00403213	0.309295	0.000227273	0.0378345	0.000905569	0.254225	Dvl2	dishevelled 2, dsh homolog (Drosophila)
FTM	ENSMUSG00000027006	-0.212233	0.0140779	0.387834	0.000230008	0.0381544	0.000849018	0.254225	Dnajc10	DnaJ (Hsp40) homolog, subfamily C, member 10
FTM	ENSMUSG00000001687	-0.326613	0.001851	0.27182	0.00024264	0.0382654	0.00205232	0.302102	Ubl3	ubiquitin-like 3
FTM	ENSMUSG00000058704	-0.309882	0.00175179	0.267452	0.000244845	0.0382654	0.00290091	0.31317	Memo1	mediator of cell motility 1
FTM	ENSMUSG00000040359	-0.184641	0.026808	0.451245	0.000245006	0.0382654	0.00151968	0.275044	Ufl1	UFM1 specific ligase 1
FTM	ENSMUSG00000031935	-0.263791	0.017169	0.406969	0.000254083	0.0387757	0.00141794	0.272256	Med17	mediator complex subunit 17
FTM	ENSMUSG00000037822	-0.426686	0.00271094	0.286941	0.00026302	0.03919	0.0019831	0.302102	Smim14	small integral membrane protein 14
FTM	ENSMUSG00000022848	-0.38053	0.00156908	0.259016	0.000269499	0.03919	0.000741849	0.247943	Dirc2	disrupted in renal carcinoma 2 (human)
FTM	ENSMUSG00000002031	-0.243779	0.000825425	0.217608	0.000274941	0.0393041	0.00113684	0.257482	Ift46	intraflagellar transport 46
FTM	ENSMUSG00000061024	-0.219666	0.0824351	0.577005	0.000278076	0.0394388	0.00235219	0.303324	Rrs1	RRS1 ribosome biogenesis regulator homolog (S. cerevisiae)
FTM	ENSMUSG00000030245	-0.30608	0.00575018	0.325923	0.000290058	0.0399702	0.00116068	0.257571	Golt1b	golgi transport 1 homolog B (S. cerevisiae)
FTM	ENSMUSG00000035268	-0.397461	0.181969	0.69701	0.000320155	0.0411772	0.00109452	0.257482	Pkig	protein kinase inhibitor, gamma
FTM	ENSMUSG00000025133	-4.09066e-05	0.999748	0.999895	0.000322019	0.0411913	0.00162359	0.276893	Ints4	integrator complex subunit 4
FTM	ENSMUSG00000038299	-0.426318	0.00593076	0.328585	0.000323695	0.0412931	0.00314134	0.314657	Wdr36	WD repeat domain 36
FTM	ENSMUSG00000029634	-0.39181	0.0513176	0.527057	0.000332848	0.0416681	0.000973189	0.255231	Rnf6	ring finger protein (C3H2C3 type) 6
FTM	ENSMUSG00000053080	-0.268305	0.0951913	0.5964	0.000360439	0.0429618	0.00235956	0.303324	2700081O15Rik	RIKEN cDNA 2700081O15 gene
FTM	ENSMUSG00000041775	-0.168164	0.103906	0.6092	0.000373534	0.0436051	0.00292396	0.31317	Mapk1ip1	mitogen-activated protein kinase 1 interacting protein 1
FTM	ENSMUSG00000034327	-0.384389	0.00206495	0.272301	0.000399772	0.0436404	0.00238496	0.303324	Kctd9	potassium channel tetramerisation domain containing 9
FTM	ENSMUSG00000027671	-0.222996	0.00284637	0.288236	0.000406523	0.0436404	0.00136176	0.272256	Actl6a	actin-like 6A
FTM	ENSMUSG00000042712	-0.553872	0.00481053	0.320172	0.000435301	0.0448627	0.00573692	0.339208	Wbp5	WW domain binding protein 5
FTM	ENSMUSG00000020198	-0.16376	0.00182351	0.27182	0.00043803	0.0448647	0.00285738	0.31317	Ap3d1	adaptor-related protein complex 3, delta 1 subunit
FTM	ENSMUSG00000095098	-0.271863	0.0608678	0.543142	0.000445026	0.0449984	0.00163089	0.276893	Ccdc85b	coiled-coil domain containing 85B
FTM	ENSMUSG00000032393	-0.373646	0.00631509	0.329267	0.000471699	0.0460372	0.00409057	0.322742	Dpp8	dipeptidylpeptidase 8
FTM	ENSMUSG00000020280	-0.166141	0.120665	0.629585	0.000487732	0.046336	0.0023472	0.303324	Pus10	pseudouridylate synthase 10
FTM	ENSMUSG00000008763	-0.50517	0.000721888	0.213538	0.000529152	0.0476621	0.00494483	0.331599	Man1a2	mannosidase, alpha, class 1A, member 2
FTM	ENSMUSG00000063160	-0.313019	0.0251726	0.445095	0.00054408	0.048116	0.00201468	0.302102	Numbl	numb-like
FTM	ENSMUSG00000064363	-2.27178	0.0055129	0.323475	0.000544245	0.048116	0.00395381	0.322742	mt-Nd4	mitochondrially encoded NADH dehydrogenase 4
FTM	ENSMUSG00000020107	-0.448084	0.0053553	0.32276	0.000549475	0.0481395	0.00767672	0.352572	Anapc16	anaphase promoting complex subunit 16
FTM	ENSMUSG00000045107	-0.342855	0.00599082	0.329028	0.000552383	0.0482898	0.00348131	0.322742	Saysd1	SAYSVFN motif domain containing 1
FTM	ENSMUSG00000079334	-0.421494	0.00877549	0.351939	0.00056959	0.0484406	0.00458621	0.331599	Nat6	N-acetyltransferase 6
FTM	ENSMUSG00000063253	-0.225915	0.0149093	0.39478	0.000590538	0.0491615	0.0021394	0.302102	Scoc	short coiled-coil protein
FTM	ENSMUSG00000016256	-0.559463	0.00159454	0.259016	0.000592505	0.0491615	0.00294254	0.313744	Ctsz	cathepsin Z
FTM	ENSMUSG00000020171	-0.239364	0.012222	0.375164	0.000593808	0.0491615	0.00517372	0.332705	Yeats4	YEATS domain containing 4
FTM	ENSMUSG00000034902	-0.245736	0.00222238	0.276625	0.000621055	0.0499648	0.00376829	0.322742	Pip5k1c	phosphatidylinositol-4-phosphate 5-kinase, type 1 gamma
FTM	ENSMUSG00000037526	-0.226367	0.00720768	0.335342	0.000632129	0.0503064	0.00170328	0.284743	Atg14	autophagy related 14
FTM	ENSMUSG00000032388	-0.327144	0.00114734	0.234195	0.000632317	0.0503064	0.00226677	0.303173	Spg21	spastic paraplegia 21 homolog (human)
FTM	ENSMUSG00000025967	-0.285694	0.0017205	0.267452	0.000649046	0.0509714	0.00872318	0.356095	Eef1b2	eukaryotic translation elongation factor 1 beta 2
FTM	ENSMUSG00000025103	-0.351153	0.00582663	0.32602	0.00065741	0.0509714	0.00295049	0.313744	Btbd1	BTB (POZ) domain containing 1
FTM	ENSMUSG00000025873	-0.206438	0.0102051	0.360304	0.000676013	0.0509714	0.00341725	0.320845	Faf2	Fas associated factor family member 2
FTM	ENSMUSG00000038042	-0.397983	0.0096176	0.356244	0.000701472	0.0513738	0.00567461	0.337827	Ptpdc1	protein tyrosine phosphatase domain containing 1
FTM	ENSMUSG00000004865	-0.228443	0.00944542	0.355301	0.000759246	0.0528735	0.00315046	0.314657	Srpk1	serine/arginine-rich protein specific kinase 1
FTM	ENSMUSG00000028882	-0.169385	0.00704175	0.335342	0.000783648	0.0530227	0.00421861	0.326265	Ppp1r8	protein phosphatase 1, regulatory (inhibitor) subunit 8
FTM	ENSMUSG00000021186	-0.723522	0.00125941	0.239306	0.000786815	0.0530227	0.00275048	0.311751	Fbln5	fibulin 5
FTM	ENSMUSG00000013858	-0.16767	0.0772463	0.568768	0.000816112	0.0534638	0.00385912	0.322742	Tmem259	transmembrane protein 259
FTM	ENSMUSG00000000561	-0.269035	0.00306123	0.292544	0.000817703	0.0534638	0.00699753	0.348758	Wdr77	WD repeat domain 77
FTM	ENSMUSG00000021420	-0.233688	0.00244875	0.285196	0.0008445	0.054042	0.00722302	0.350865	Fars2	phenylalanine-tRNA synthetase 2 (mitochondrial)
FTM	ENSMUSG00000028295	-0.334743	0.040126	0.497536	0.000851067	0.0541102	0.0143672	0.386073	Smim8	small integral membrane protein 8
FTM	ENSMUSG00000021987	-0.202011	0.0377756	0.490623	0.000851793	0.0541102	0.00400719	0.322742	Mtmr6	myotubularin related protein 6
FTM	ENSMUSG00000020720	-0.205378	0.00336785	0.295166	0.00086317	0.0542256	0.00393752	0.322742	Psmd12	proteasome (prosome, macropain) 26S subunit, non-ATPase, 12
FTM	ENSMUSG00000019977	-0.131013	0.0185769	0.417255	0.00087348	0.0542691	0.00261616	0.311381	Hbs1l	Hbs1-like (S. cerevisiae)
FTM	ENSMUSG00000029475	-0.120309	0.0153276	0.398112	0.000882828	0.0545984	0.00497185	0.331599	Kdm2b	lysine (K)-specific demethylase 2B
FTM	ENSMUSG00000021102	-0.131121	0.0452421	0.51401	0.000900742	0.0548516	0.00310486	0.314657	Glrx5	glutaredoxin 5 homolog (S. cerevisiae)
FTM	ENSMUSG00000027656	-1.25627	0.0112211	0.367606	0.00092241	0.0552445	0.0106763	0.363549	Wisp2	WNT1 inducible signaling pathway protein 2
FTM	ENSMUSG00000024587	-0.27632	0.00543355	0.323475	0.000927052	0.0553332	0.00331204	0.318607	Nars	asparaginyl-tRNA synthetase
FTM	ENSMUSG00000036810	-0.282657	0.00550879	0.323475	0.000944398	0.0554878	0.0122604	0.370854	Cnep1r1	CTD nuclear envelope phosphatase 1 regulatory subunit 1
FTM	ENSMUSG00000028788	-0.214786	0.0145823	0.392735	0.000950816	0.0556314	0.00763941	0.352572	Ptp4a2	protein tyrosine phosphatase 4a2
FTM	ENSMUSG00000068732	-0.287645	0.00544263	0.323475	0.000952549	0.0556314	0.00341528	0.320845	Tmem167b	transmembrane protein 167B
FTM	ENSMUSG00000015357	-0.175404	0.00669732	0.332793	0.000960835	0.0556899	0.00863894	0.35606	Clpx	caseinolytic mitochondrial matrix peptidase chaperone subunit
FTM	ENSMUSG00000038388	-0.825166	0.0020248	0.272301	0.000963301	0.0556899	0.00599239	0.340572	Mpp6	membrane protein, palmitoylated 6 (MAGUK p55 subfamily member 6)
FTM	ENSMUSG00000078249	-0.721438	0.00468231	0.317289	0.000965738	0.0556899	0.0140507	0.382382	Hmga1-rs1	high mobility group AT-hook I, related sequence 1
FTM	ENSMUSG00000026187	-0.182414	0.0915722	0.591806	0.000980381	0.0561268	0.00583625	0.339387	Xrcc5	X-ray repair complementing defective repair in Chinese hamster cells 5
FTM	ENSMUSG00000021144	-0.111558	0.0291244	0.461129	0.000993202	0.0563114	0.00659183	0.345581	Mta1	metastasis associated 1
FTM	ENSMUSG00000037072	-0.158216	0.00484839	0.320172	0.000998826	0.0564259	0.00352486	0.322742	Sep15	selenoprotein
FTM	ENSMUSG00000027665	-0.368517	0.00359695	0.298946	0.00100476	0.0565625	0.0026734	0.311381	Pik3ca	phosphatidylinositol 3-kinase, catalytic, alpha polypeptide
FTM	ENSMUSG00000029649	-0.260281	0.00277548	0.286946	0.00100588	0.0565625	0.00371224	0.322742	Pomp	proteasome maturation protein
FTM	ENSMUSG00000021096	-0.354326	0.0016747	0.264523	0.00100976	0.0566349	0.00266683	0.311381	Ppm1a	protein phosphatase 1A, magnesium dependent, alpha isoform
FTM	ENSMUSG00000023068	-0.250081	0.00250969	0.285964	0.00103147	0.0568089	0.00292857	0.31317	Nus1	nuclear undecaprenyl pyrophosphate synthase 1 homolog (S. cerevisiae)
FTM	ENSMUSG00000020186	-0.805397	0.00236297	0.281318	0.0010424	0.0568144	0.00404562	0.322742	Csrp2	cysteine and glycine-rich protein 2
FTM	ENSMUSG00000053746	-0.485539	0.00190756	0.27182	0.00104748	0.0568398	0.00776173	0.352572	Ptrh1	peptidyl-tRNA hydrolase 1 homolog (S. cerevisiae)
FTM	ENSMUSG00000060376	-0.181551	0.0163994	0.402401	0.00105238	0.0568517	0.00503987	0.331599	Bckdha	branched chain ketoacid dehydrogenase E1, alpha polypeptide
FTM	ENSMUSG00000029227	-0.265476	0.00311998	0.292544	0.0010678	0.0571581	0.00310747	0.314657	Fip1l1	FIP1 like 1 (S. cerevisiae)
FTM	ENSMUSG00000002845	-0.204814	0.00349844	0.298946	0.00107536	0.0571679	0.00389689	0.322742	Tmem39a	transmembrane protein 39a
FTM	ENSMUSG00000019897	-0.115748	0.225678	0.732302	0.00111777	0.0576434	0.00557463	0.336771	Ccdc59	coiled-coil domain containing 59
FTM	ENSMUSG00000058569	-0.145352	0.00448476	0.31525	0.0011272	0.0576434	0.00352515	0.322742	Tmed9	transmembrane emp24 protein transport domain containing 9
FTM	ENSMUSG00000040242	-0.326902	0.0364202	0.485295	0.00116528	0.058344	0.004124	0.323682	Fgfr1op2	FGFR1 oncogene partner 2
FTM	ENSMUSG00000059552	-0.416951	0.00437779	0.311387	0.0011671	0.058344	0.0157526	0.389542	Trp53	transformation related protein 53
FTM	ENSMUSG00000027102	-0.584617	0.0181908	0.414498	0.00117053	0.058344	0.00277704	0.311886	Hoxd8	homeobox D8
FTM	ENSMUSG00000030057	-0.155403	0.00618041	0.329267	0.00117574	0.0583459	0.00798467	0.354173	Cnbp	cellular nucleic acid binding protein
FTM	ENSMUSG00000034620	-0.374951	0.0084063	0.348501	0.00120557	0.0585295	0.00941446	0.357379	Tmem5	transmembrane protein 5
FTM	ENSMUSG00000001313	-0.529143	0.0114216	0.368125	0.00120908	0.0585295	0.00775899	0.352572	Rnd2	Rho family GTPase 2
FTM	ENSMUSG00000041415	-0.27274	0.0119358	0.374001	0.00122924	0.0585486	0.0037047	0.322742	Dicer1	dicer 1, ribonuclease type III
FTM	ENSMUSG00000068882	-0.186355	0.00192999	0.27182	0.00123096	0.0585486	0.00472927	0.331599	Ssb	Sjogren syndrome antigen B
FTM	ENSMUSG00000021428	-0.343801	0.00822244	0.347209	0.00124169	0.0588218	0.00308327	0.314657	Riok1	RIO kinase 1 (yeast)
FTM	ENSMUSG00000073639	-0.168576	0.0040696	0.310646	0.00124937	0.0589938	0.0042942	0.327259	Rab18	RAB18, member RAS oncogene family
FTM	ENSMUSG00000026575	-0.236098	0.0198357	0.422954	0.00126737	0.0589938	0.00609445	0.343462	Nme7	NME/NM23 family member 7
FTM	ENSMUSG00000021103	-0.304107	0.00564609	0.323851	0.00127683	0.0589938	0.00429397	0.327259	Mnat1	menage a trois 1
FTM	ENSMUSG00000034863	-0.239799	0.104685	0.609362	0.00127886	0.0589938	0.0046828	0.331599	Ano8	anoctamin 8
FTM	ENSMUSG00000027253	-0.880454	0.00612839	0.329267	0.00129712	0.0590617	0.00565802	0.337827	Lrp4	low density lipoprotein receptor-related protein 4
FTM	ENSMUSG00000042390	-0.19255	0.0513192	0.527057	0.00131884	0.0593604	0.0118774	0.369505	Gatad2b	GATA zinc finger domain containing 2B
FTM	ENSMUSG00000025374	-0.298136	0.00754667	0.338247	0.00133787	0.0597018	0.00528111	0.333059	Nabp2	nucleic acid binding protein 2
FTM	ENSMUSG00000028476	-0.309823	0.0582198	0.540697	0.00137178	0.0601482	0.0038564	0.322742	Reck	reversion-inducing-cysteine-rich protein with kazal motifs
FTM	ENSMUSG00000029287	-0.89767	0.0199799	0.424414	0.00137886	0.0602145	0.00449357	0.331518	Tgfbr3	transforming growth factor, beta receptor III
FTM	ENSMUSG00000020585	-0.283715	0.00494171	0.320172	0.00139903	0.0603588	0.0244472	0.418823	Laptm4a	lysosomal-associated protein transmembrane 4A
FTM	ENSMUSG00000034686	-0.912081	0.00673735	0.332793	0.00142312	0.0603588	0.00820204	0.356022	Prr7	proline rich 7 (synaptic)
FTM	ENSMUSG00000057110	-0.273367	0.0185564	0.417031	0.00145546	0.0607889	0.00953081	0.357379	Cntrl	centriolin
FTM	ENSMUSG00000037791	-0.154111	0.00783031	0.341948	0.00147246	0.0609734	0.00512396	0.331899	Phf12	PHD finger protein 12
FTM	ENSMUSG00000028156	-0.151389	0.0237293	0.438917	0.00147287	0.0609734	0.0192468	0.407587	Eif4e	eukaryotic translation initiation factor 4E
FTM	ENSMUSG00000027746	-0.285063	0.0100411	0.357755	0.00149665	0.0612967	0.00661655	0.345895	Ufm1	ubiquitin-fold modifier 1
FTM	ENSMUSG00000024952	-0.208582	0.00254524	0.286941	0.00154414	0.0620102	0.0048269	0.331599	Rps6ka4	ribosomal protein S6 kinase, polypeptide 4
FTM	ENSMUSG00000069808	-0.228701	0.0215166	0.429987	0.00158996	0.0625178	0.0204718	0.411721	Fam57a	family with sequence similarity 57, member A
FTM	ENSMUSG00000074922	-0.185555	0.0235138	0.438735	0.00160369	0.0627099	0.00508854	0.331899	Fam122a	family with sequence similarity 122, member A
FTM	ENSMUSG00000021067	-0.303499	0.0223996	0.432614	0.00160497	0.0627099	0.00938148	0.357379	Sav1	salvador homolog 1 (Drosophila)
FTM	ENSMUSG00000024012	-0.232132	0.025731	0.448269	0.00160966	0.0627099	0.00551679	0.335796	Mtch1	mitochondrial carrier homolog 1 (C. elegans)
FTM	ENSMUSG00000031536	-0.259531	0.00736309	0.338145	0.00161851	0.0628462	0.0108796	0.363797	Polb	polymerase (DNA directed), beta
FTM	ENSMUSG00000019864	-0.287245	0.00901527	0.351939	0.00168656	0.0634927	0.0256342	0.423481	Rtn4ip1	reticulon 4 interacting protein 1
FTM	ENSMUSG00000029176	-0.242779	0.00480705	0.320172	0.00169494	0.0636552	0.00543543	0.334714	Anapc4	anaphase promoting complex subunit 4
FTM	ENSMUSG00000033701	-0.201435	0.00429278	0.311387	0.00170184	0.0638634	0.00617346	0.345056	Acbd6	acyl-Coenzyme A binding domain containing 6
FTM	ENSMUSG00000044452	-0.2337	0.116558	0.624778	0.00170533	0.0639071	0.0122264	0.370843	Zfp507	zinc finger protein 507
FTM	ENSMUSG00000047434	-0.284098	0.00881338	0.351939	0.00172686	0.063978	0.00635101	0.345056	Xxylt1	xyloside xylosyltransferase 1
FTM	ENSMUSG00000022064	-0.223979	0.00367823	0.299108	0.00172827	0.063978	0.0100168	0.358454	Pibf1	progesterone immunomodulatory binding factor 1
FTM	ENSMUSG00000029408	-0.498171	0.106474	0.611137	0.00173902	0.0639872	0.00907336	0.357379	Abcb9	ATP-binding cassette, sub-family B (MDR/TAP), member 9
FTM	ENSMUSG00000021218	-0.198662	0.00418235	0.310905	0.00174564	0.0639872	0.00977193	0.357379	Gdi2	guanosine diphosphate (GDP) dissociation inhibitor 2
FTM	ENSMUSG00000041890	-0.305087	0.00458285	0.316385	0.00174614	0.0639872	0.00708753	0.349315	Git2	G protein-coupled receptor kinase-interactor 2
FTM	ENSMUSG00000055013	-0.33648	0.0315857	0.469173	0.00176129	0.0639872	0.0156434	0.389542	Agap1	ArfGAP with GTPase domain, ankyrin repeat and PH domain 1
FTM	ENSMUSG00000042104	-0.412441	0.00497218	0.320172	0.00177392	0.0640097	0.006026	0.341243	Uggt2	UDP-glucose glycoprotein glucosyltransferase 2
FTM	ENSMUSG00000035069	-0.200159	0.110318	0.615453	0.00178083	0.0641535	0.00456468	0.331599	Oma1	OMA1 homolog, zinc metallopeptidase (S. cerevisiae)
FTM	ENSMUSG00000015749	-0.318059	0.00901243	0.351939	0.00178942	0.0642725	0.0107	0.363549	Anp32e	acidic (leucine-rich) nuclear phosphoprotein 32 family, member E
FTM	ENSMUSG00000024725	-0.119272	0.257151	0.753146	0.00180988	0.0645309	0.00519904	0.332973	Ostf1	osteoclast stimulating factor 1
FTM	ENSMUSG00000048756	-0.308213	0.0150096	0.395857	0.0018129	0.0645309	0.004531	0.331599	Foxo3	forkhead box O3
FTM	ENSMUSG00000028617	-0.233585	0.0122755	0.375164	0.001817	0.0645718	0.0100715	0.358731	Lrrc42	leucine rich repeat containing 42
FTM	ENSMUSG00000030087	-0.653037	0.0143058	0.390231	0.00183842	0.0647446	0.0220948	0.41455	Klf15	Kruppel-like factor 15
FTM	ENSMUSG00000055148	-0.585774	0.00757935	0.338247	0.00184848	0.0649307	0.0148533	0.389297	Klf2	Kruppel-like factor 2 (lung)
FTM	ENSMUSG00000032249	-0.182572	0.0243458	0.44145	0.00184902	0.0649307	0.0140203	0.381777	Anp32a	acidic (leucine-rich) nuclear phosphoprotein 32 family, member A
FTM	ENSMUSG00000040128	-0.238443	0.0961023	0.597693	0.00186741	0.0650931	0.00662552	0.345979	Pnrc1	proline-rich nuclear receptor coactivator 1
FTM	ENSMUSG00000022369	-0.378105	0.0200027	0.424707	0.00189489	0.0653278	0.00974647	0.357379	Mtbp	Mdm2, transformed 3T3 cell double minute p53 binding protein
FTM	ENSMUSG00000059482	-0.401926	0.00804031	0.345607	0.00191666	0.0657252	0.0123869	0.372856	2610301B20Rik	RIKEN cDNA 2610301B20 gene
FTM	ENSMUSG00000026956	-0.387843	0.0418341	0.502519	0.00196928	0.0664076	0.014859	0.389297	Uap1l1	UDP-N-acteylglucosamine pyrophosphorylase 1-like 1
FTM	ENSMUSG00000021982	-0.334996	0.0194181	0.420277	0.00197044	0.0664076	0.00705656	0.348758	Cdadc1	cytidine and dCMP deaminase domain containing 1
FTM	ENSMUSG00000048661	-0.0736169	0.225171	0.732012	0.0019758	0.0664076	0.00579811	0.339387	Lemd3	LEM domain containing 3
FTM	ENSMUSG00000037251	-0.0782185	0.482869	0.867743	0.00197827	0.0664076	0.00943596	0.357379	Pomk	protein-O-mannose kinase
FTM	ENSMUSG00000029535	-0.26388	0.0127215	0.376972	0.001979	0.0664076	0.00644013	0.345056	Triap1	TP53 regulated inhibitor of apoptosis 1
FTM	ENSMUSG00000041459	-0.202855	0.0155105	0.398945	0.0019967	0.0666206	0.00420539	0.325779	Tardbp	TAR DNA binding protein
FTM	ENSMUSG00000049672	-0.153979	0.140896	0.655957	0.00201133	0.0668967	0.00985737	0.357616	Zbtb14	zinc finger and BTB domain containing 14
FTM	ENSMUSG00000030805	-0.114142	0.211392	0.722244	0.00203177	0.0670586	0.00879451	0.356795	Stx4a	syntaxin 4A (placental)
FTM	ENSMUSG00000078941	-0.303277	0.0136481	0.385478	0.00204837	0.0673516	0.00650737	0.345214	Ak6	adenylate kinase 6
FTM	ENSMUSG00000035273	-0.743977	0.0705093	0.55713	0.00206636	0.0674995	0.00744498	0.351655	Hpse	heparanase
FTM	ENSMUSG00000020883	-0.247307	0.0743647	0.56467	0.00207878	0.0675919	0.00833067	0.35606	Fbxl20	F-box and leucine-rich repeat protein 20
FTM	ENSMUSG00000024287	-0.144328	0.0220076	0.43121	0.0020927	0.0676998	0.00704969	0.348758	Thoc1	THO complex 1
FTM	ENSMUSG00000015542	-0.313872	0.0136321	0.385478	0.00216667	0.0680309	0.0144769	0.387357	Nat9	N-acetyltransferase 9 (GCN5-related, putative)
FTM	ENSMUSG00000016319	-0.329498	0.0260628	0.448756	0.00217041	0.0680309	0.00698037	0.348758	Slc25a5	solute carrier family 25 (mitochondrial carrier, adenine nucleotide translocator), member 5
FTM	ENSMUSG00000044502	-0.336738	0.00539502	0.323475	0.00218093	0.0680309	0.00588666	0.339387	Bod1	biorientation of chromosomes in cell division 1
FTM	ENSMUSG00000033352	-0.243543	0.00319178	0.292544	0.00219941	0.0682427	0.0070526	0.348758	Map2k4	mitogen-activated protein kinase kinase 4
FTM	ENSMUSG00000039001	-0.189077	0.0267773	0.451245	0.00220751	0.0683945	0.00689459	0.348758	Rps21	ribosomal protein S21
FTM	ENSMUSG00000019841	-0.280597	0.0105088	0.362847	0.00220898	0.0683945	0.00929656	0.357379	Rev3l	REV3-like, catalytic subunit of DNA polymerase zeta RAD54 like (S. cerevisiae)
FTM	ENSMUSG00000025868	-0.205148	0.0164684	0.40254	0.00222587	0.068718	0.00933733	0.357379	Higd2a	HIG1 domain family, member 2A
FTM	ENSMUSG00000028759	-0.125473	0.0297365	0.463791	0.00223123	0.0687755	0.00723569	0.350865	Hp1bp3	heterochromatin protein 1, binding protein 3
FTM	ENSMUSG00000020284	-0.203239	0.0119248	0.374001	0.00226932	0.0689183	0.0152832	0.389542	1810043G02Rik	RIKEN cDNA 1810043G02 gene
FTM	ENSMUSG00000034210	-0.273728	0.031154	0.466737	0.00230941	0.0694534	0.00639991	0.345056	Efcab14	EF-hand calcium binding domain 14
FTM	ENSMUSG00000058571	-0.953388	0.0148594	0.394526	0.0023611	0.0700229	0.0126074	0.372856	Gpc6	glypican 6
FTM	ENSMUSG00000030127	-0.16133	0.00897688	0.351939	0.00240606	0.0705952	0.00827889	0.356022	Cops7a	COP9 (constitutive photomorphogenic) homolog, subunit 7a (Arabidopsis thaliana)
FTM	ENSMUSG00000032263	-0.345355	0.0241278	0.44145	0.00250715	0.0713543	0.0183055	0.404149	Bckdhb	branched chain ketoacid dehydrogenase E1, beta polypeptide
FTM	ENSMUSG00000020801	-0.327039	0.00981957	0.356925	0.00251773	0.0713736	0.00909635	0.357379	Med31	mediator complex subunit 31
FTM	ENSMUSG00000032492	-1.1969	0.00589576	0.328195	0.00252447	0.0713914	0.0109615	0.363797	Pth1r	parathyroid hormone 1 receptor
FTM	ENSMUSG00000071076	-0.213226	0.01864	0.417386	0.00252468	0.0713914	0.0105043	0.362591	Jund	jun D proto-oncogene
FTM	ENSMUSG00000041199	-0.318066	0.0115225	0.368429	0.00252824	0.0713914	0.0234573	0.417729	Rpusd1	RNA pseudouridylate synthase domain containing 1
FTM	ENSMUSG00000039210	-0.156964	0.167898	0.681538	0.0025644	0.0718721	0.006794	0.348573	Gpatch2	G patch domain containing 2
FTM	ENSMUSG00000024975	-0.324073	0.149734	0.663731	0.00261139	0.0725395	0.00738805	0.351564	Pdcd4	programmed cell death 4
FTM	ENSMUSG00000020653	-0.318641	0.00929953	0.354468	0.00264493	0.072756	0.0258778	0.42566	Klf11	Kruppel-like factor 11
FTM	ENSMUSG00000002458	-0.375319	0.00732201	0.337986	0.00264506	0.072756	0.00865071	0.35606	Rgs19	regulator of G-protein signaling 19
FTM	ENSMUSG00000035078	-0.468983	0.00393559	0.30671	0.002646	0.072756	0.00943478	0.357379	Mtmr9	myotubularin related protein 9
FTM	ENSMUSG00000022174	-0.185697	0.00995571	0.356925	0.00265579	0.0728203	0.0198794	0.409137	Dad1	defender against cell death 1
FTM	ENSMUSG00000047824	-0.200353	0.0209977	0.428775	0.00266893	0.0728203	0.0145562	0.387822	Pygo2	pygopus 2
FTM	ENSMUSG00000021417	-0.368718	0.0164164	0.402401	0.00268805	0.073079	0.0114529	0.366405	Eci2	enoyl-Coenzyme A delta isomerase 2
FTM	ENSMUSG00000021557	-0.374265	0.0141059	0.387834	0.00269463	0.073079	0.00703312	0.348758	Agtpbp1	ATP/GTP binding protein 1
FTM	ENSMUSG00000022828	-0.173979	0.071789	0.558705	0.00270573	0.0731263	0.0408359	0.468929	Gtf2e1	general transcription factor II E, polypeptide 1 (alpha subunit)
FTM	ENSMUSG00000043391	-0.514977	0.00615007	0.329267	0.00274569	0.0735803	0.00864887	0.35606	2510009E07Rik	RIKEN cDNA 2510009E07 gene
FTM	ENSMUSG00000030849	-0.750763	0.0407994	0.499043	0.00274668	0.0735803	0.0128097	0.374658	Fgfr2	fibroblast growth factor receptor 2
FTM	ENSMUSG00000035297	-0.122664	0.0355795	0.4826	0.00276915	0.0736531	0.00923551	0.357379	Cops4	COP9 (constitutive photomorphogenic) homolog, subunit 4 (Arabidopsis thaliana)
FTM	ENSMUSG00000020358	-0.215586	0.0185047	0.416777	0.00278429	0.0736844	0.0114976	0.366405	Hnrnpab	heterogeneous nuclear ribonucleoprotein A/B
FTM	ENSMUSG00000018559	-0.12608	0.161986	0.675369	0.00282723	0.0739425	0.0272726	0.432616	Ctdnep1	CTD nuclear envelope phosphatase 1
FTM	ENSMUSG00000021619	-0.131301	0.435723	0.849835	0.00282735	0.0739425	0.00834051	0.35606	Atg10	autophagy related 10
FTM	ENSMUSG00000015943	-0.25687	0.0546783	0.534192	0.00286219	0.0741964	0.0101416	0.359318	Bola1	bolA-like 1 (E. coli)
FTM	ENSMUSG00000032252	-0.32609	0.0354952	0.482013	0.00286832	0.0741964	0.0220259	0.41455	Glce	glucuronyl C5-epimerase
FTM	ENSMUSG00000019970	-0.699941	0.0085816	0.35167	0.00289683	0.0746387	0.00952558	0.357379	Sgk1	serum/glucocorticoid regulated kinase 1
FTM	ENSMUSG00000021770	-0.2528	0.0179527	0.412757	0.00293485	0.0752056	0.00866923	0.35606	Samd8	sterile alpha motif domain containing 8
FTM	ENSMUSG00000041685	-0.369488	0.00515829	0.320173	0.00294631	0.0753641	0.00861465	0.35606	Fcho2	FCH domain only 2
FTM	ENSMUSG00000025742	-0.50779	0.0081391	0.346248	0.00298118	0.075578	0.01415	0.38375	Prps2	phosphoribosyl pyrophosphate synthetase 2
FTM	ENSMUSG00000020390	-0.128507	0.0222301	0.431694	0.00298159	0.075578	0.00889253	0.357141	Ube2b	ubiquitin-conjugating enzyme E2B
FTM	ENSMUSG00000028573	-0.25377	0.0797363	0.57219	0.00299256	0.0757141	0.00729871	0.350865	Fggy	FGGY carbohydrate kinase domain containing
FTM	ENSMUSG00000050199	-0.506486	0.00696096	0.335342	0.00304288	0.0762262	0.00957955	0.357379	Lgr4	leucine-rich repeat-containing G protein-coupled receptor 4
FTM	ENSMUSG00000026349	-0.241948	0.0188924	0.417759	0.00305697	0.076297	0.00929061	0.357379	Ccnt2	cyclin T2
FTM	ENSMUSG00000034473	-0.29328	0.0298996	0.463791	0.00307151	0.0765133	0.0117213	0.368731	Sec22a	SEC22 vesicle trafficking protein homolog A (S. cerevisiae)
FTM	ENSMUSG00000022255	-0.190498	0.00709428	0.335342	0.00309643	0.0769392	0.0109148	0.363797	Mtdh	metadherin
FTM	ENSMUSG00000005161	-0.213008	0.140072	0.654882	0.0031139	0.0769568	0.00926474	0.357379	Prdx2	peroxiredoxin 2
FTM	ENSMUSG00000061353	-0.849791	0.0229694	0.436299	0.00314678	0.0772176	0.0110661	0.363797	Cxcl12	chemokine (C-X-C motif) ligand 12
FTM	ENSMUSG00000034158	-0.48558	0.00891439	0.351939	0.00316755	0.0774424	0.00947047	0.357379	Lrrc58	leucine rich repeat containing 58
FTM	ENSMUSG00000029312	-0.639729	0.0107159	0.364621	0.00317814	0.077465	0.0190052	0.407587	Klhl8	kelch-like 8
FTM	ENSMUSG00000039914	-0.188537	0.0172725	0.407058	0.00319238	0.0775372	0.0239218	0.41803	Coq10a	coenzyme Q10 homolog A (yeast)
FTM	ENSMUSG00000022477	-0.135024	0.0183777	0.415873	0.00319508	0.0775372	0.0110056	0.363797	Aco2	aconitase 2, mitochondrial
FTM	ENSMUSG00000036208	-0.190674	0.196679	0.71188	0.00319927	0.0775372	0.0108086	0.363797	BC027231	cDNA sequence BC027231
FTM	ENSMUSG00000068267	-0.227766	0.0337062	0.477255	0.00320785	0.0775567	0.0133384	0.37886	Cenpb	centromere protein B
FTM	ENSMUSG00000046546	-0.609059	0.00487732	0.320172	0.00321445	0.0776246	0.00899211	0.357379	Fam43a	family with sequence similarity 43, member A
FTM	ENSMUSG00000042079	-0.124241	0.00840997	0.348501	0.00330173	0.0787201	0.0145316	0.387697	Hnrnpf	heterogeneous nuclear ribonucleoprotein F
FTM	ENSMUSG00000039841	-0.175892	0.0678755	0.554498	0.00330371	0.0787272	0.0195255	0.409053	Zfp800	zinc finger protein 800
FTM	ENSMUSG00000057236	-0.129438	0.167277	0.680848	0.00331243	0.078775	0.0298055	0.443315	Rbbp4	retinoblastoma binding protein 4
FTM	ENSMUSG00000047843	-0.279526	0.0132889	0.383678	0.00331709	0.0788149	0.0226084	0.416176	Bri3	brain protein I3
FTM	ENSMUSG00000029128	-0.296631	0.0291595	0.461157	0.00335598	0.079169	0.0104356	0.36215	Rab28	RAB28, member RAS oncogene family
FTM	ENSMUSG00000038633	-0.288009	0.0124932	0.375823	0.00339043	0.0794251	0.010683	0.363549	Degs1	degenerative spermatocyte homolog 1 (Drosophila)
FTM	ENSMUSG00000052214	-0.319746	0.00754822	0.338247	0.00339792	0.0794251	0.0093802	0.357379	Opa3	optic atrophy 3
FTM	ENSMUSG00000031568	-0.188634	0.0754997	0.566183	0.00340068	0.0794251	0.0187634	0.407103	Rwdd4a	RWD domain containing 4A
FTM	ENSMUSG00000025572	-0.783968	0.0135338	0.385476	0.00342211	0.0795384	0.0153974	0.389542	Tmc6	transmembrane channel-like gene family 6
FTM	ENSMUSG00000027667	-0.206415	0.0140301	0.387834	0.00343408	0.0796113	0.0392909	0.465869	Zfp639	zinc finger protein 639
FTM	ENSMUSG00000032382	-0.0879242	0.341097	0.801361	0.00346303	0.0800453	0.0143927	0.38608	Snx1	sorting nexin 1
FTM	ENSMUSG00000015839	-0.188665	0.0214709	0.429987	0.00346826	0.0800753	0.0178128	0.401895	Nfe2l2	nuclear factor, erythroid derived 2, like 2
FTM	ENSMUSG00000006498	-0.141046	0.0183333	0.415722	0.00347377	0.0801134	0.0192648	0.407587	Ptbp1	polypyrimidine tract binding protein 1
FTM	ENSMUSG00000031059	-0.126784	0.0497267	0.525281	0.00347451	0.0801134	0.0154376	0.389542	Ndufb11	NADH dehydrogenase (ubiquinone) 1 beta subcomplex, 11
FTM	ENSMUSG00000035572	-0.219541	0.0246445	0.442855	0.00350558	0.0802762	0.0125084	0.372856	Dcaf10	DDB1 and CUL4 associated factor 10
FTM	ENSMUSG00000016833	-0.146215	0.0125497	0.375823	0.00352786	0.0804739	0.0219671	0.414499	Mrps18c	mitochondrial ribosomal protein S18C
FTM	ENSMUSG00000033004	-0.146184	0.433549	0.849208	0.00353881	0.0806062	0.00826005	0.356022	Mycbp2	MYC binding protein 2
FTM	ENSMUSG00000026816	-0.185336	0.0152318	0.397758	0.00358745	0.0812127	0.0217492	0.413779	Gtf3c5	general transcription factor IIIC, polypeptide 5
FTM	ENSMUSG00000024712	-0.278223	0.0152021	0.397758	0.00359389	0.0812275	0.022812	0.41667	Rfk	riboflavin kinase
FTM	ENSMUSG00000078532	-0.927188	0.00570508	0.323851	0.00360895	0.081387	0.0303635	0.446	Nkain1	Na+/K+ transporting ATPase interacting 1
FTM	ENSMUSG00000023861	-0.374335	0.0104664	0.362141	0.00368055	0.0816557	0.00967068	0.357379	Mpc1	mitochondrial pyruvate carrier 1
FTM	ENSMUSG00000058444	-0.134539	0.108889	0.614471	0.00370831	0.081793	0.0121821	0.370843	Map2k5	mitogen-activated protein kinase kinase 5
FTM	ENSMUSG00000001105	-0.155538	0.102896	0.607591	0.00372911	0.0818758	0.0126364	0.372856	Ift20	intraflagellar transport 20
FTM	ENSMUSG00000096199	-0.276174	0.0314209	0.469103	0.00373429	0.0818758	0.033485	0.456863	Ptrhd1	peptidyl-tRNA hydrolase domain containing 1
FTM	ENSMUSG00000023353	-0.229315	0.0163497	0.402181	0.00375829	0.0819752	0.0109991	0.363797	Agap3	ArfGAP with GTPase domain, ankyrin repeat and PH domain 3
FTM	ENSMUSG00000079317	-0.328142	0.015039	0.396198	0.00378456	0.0819752	0.0253694	0.422304	Trappc2	trafficking protein particle complex 2
FTM	ENSMUSG00000090262	-0.398372	0.0188876	0.417759	0.00379264	0.0819752	0.0120569	0.370843
FTM	ENSMUSG00000032002	-0.246778	0.0489247	0.524097	0.00382289	0.0821352	0.0246477	0.419542	Dcun1d5	DCN1, defective in cullin neddylation 1, domain containing 5 (S. cerevisiae)
FTM	ENSMUSG00000047649	-0.407435	0.0329119	0.474666	0.00383584	0.0822416	0.0287402	0.437135	Cd3eap	CD3E antigen, epsilon polypeptide associated protein
FTM	ENSMUSG00000021891	-0.378316	0.00678718	0.332793	0.00385879	0.0823038	0.0117983	0.368795	Mettl6	methyltransferase like 6
FTM	ENSMUSG00000035325	-0.20312	0.0194917	0.420403	0.003864	0.0823345	0.0118459	0.369183	Sec31a	Sec31 homolog A (S. cerevisiae)
FTM	ENSMUSG00000021661	-0.262505	0.0166952	0.402807	0.00388011	0.082571	0.0120355	0.370843	Ankra2	ankyrin repeat, family A (RFXANK-like), 2
FTM	ENSMUSG00000057177	-0.13129	0.0129404	0.379839	0.00388901	0.0825806	0.0198775	0.409137	Gsk3a	glycogen synthase kinase 3 alpha
FTM	ENSMUSG00000013787	-0.262137	0.00800391	0.345607	0.00389475	0.0825806	0.0168879	0.395807	Ehmt2	euchromatic histone lysine N-methyltransferase 2
FTM	ENSMUSG00000072825	-0.16555	0.0930229	0.594554	0.00393214	0.0825816	0.0265836	0.42974	Cep170b	centrosomal protein 170B
FTM	ENSMUSG00000057541	-0.242994	0.0321147	0.471503	0.00393656	0.0825816	0.0152076	0.389542	Pus7	pseudouridylate synthase 7 homolog (S. cerevisiae)
FTM	ENSMUSG00000059586	-0.281092	0.0203903	0.428016	0.00393935	0.0825961	0.0184045	0.405388	Nsmce2	non-SMC element 2 homolog (MMS21, S. cerevisiae)
FTM	ENSMUSG00000013833	-0.248389	0.00517397	0.320173	0.00394525	0.0826829	0.0135435	0.380504	Med16	mediator complex subunit 16
FTM	ENSMUSG00000038582	-0.215645	0.0575661	0.540644	0.00397539	0.0828841	0.0111334	0.363993	Pptc7	PTC7 protein phosphatase homolog (S. cerevisiae)
FTM	ENSMUSG00000042167	-0.182288	0.0172241	0.407	0.00401654	0.0833733	0.0125603	0.372856	Papd4	PAP associated domain containing 4
FTM	ENSMUSG00000060450	-0.26567	0.0122621	0.375164	0.00403871	0.083401	0.0110359	0.363797	Rnf14	ring finger protein 14
FTM	ENSMUSG00000020590	-0.234549	0.00929257	0.354468	0.0040909	0.0836647	0.0228333	0.41667	Snx13	sorting nexin 13
FTM	ENSMUSG00000026436	-0.360853	0.00762743	0.33887	0.00411641	0.0838372	0.035191	0.458626	Elk4	ELK4, member of ETS oncogene family
FTM	ENSMUSG00000026457	-0.138106	0.0423492	0.504618	0.00418203	0.0839729	0.026766	0.43017	Adipor1	adiponectin receptor 1
FTM	ENSMUSG00000029413	-0.281163	0.330462	0.795777	0.00425753	0.0844758	0.0241606	0.418322	Naaa	N-acylethanolamine acid amidase
FTM	ENSMUSG00000031429	-0.185374	0.0680826	0.555015	0.00429733	0.0845936	0.0139642	0.381777	Psmd10	proteasome (prosome, macropain) 26S subunit, non-ATPase, 10
FTM	ENSMUSG00000063049	-0.367885	0.0265419	0.449735	0.00435064	0.0849942	0.0138206	0.381774	Ing2	inhibitor of growth family, member 2
FTM	ENSMUSG00000032348	-0.802167	0.061115	0.543142	0.00442407	0.0857871	0.0151116	0.389542	Gsta4	glutathione S-transferase, alpha 4
FTM	ENSMUSG00000039166	-0.318732	0.0260713	0.448756	0.00442423	0.0857871	0.0128618	0.374888	Akap7	A kinase (PRKA) anchor protein 7
FTM	ENSMUSG00000045128	-0.168663	0.0468594	0.519928	0.00443474	0.0858511	0.0144382	0.386653	Rpl18a	ribosomal protein L18A
FTM	ENSMUSG00000024620	-0.334697	0.00752638	0.338247	0.00446218	0.0861194	0.0165039	0.393288	Pdgfrb	platelet derived growth factor receptor, beta polypeptide
FTM	ENSMUSG00000030254	-0.441007	0.0162475	0.401892	0.00446302	0.0861194	0.0131318	0.3771	Rad18	RAD18 E3 ubiquitin protein ligase
FTM	ENSMUSG00000064138	-0.267347	0.0430947	0.506633	0.00448287	0.0862902	0.0116039	0.366586	Fam172a	family with sequence similarity 172, member A
FTM	ENSMUSG00000021794	-0.178925	0.204413	0.717729	0.00448792	0.0862902	0.0127304	0.373902	Glud1	glutamate dehydrogenase 1
FTM	ENSMUSG00000019437	-0.311441	0.0137939	0.387063	0.00450205	0.0864205	0.0376603	0.46257	Tlcd1	TLC domain containing 1
FTM	ENSMUSG00000006599	-0.129605	0.230717	0.735654	0.00450465	0.0864205	0.013653	0.380998	Gtf2h1	general transcription factor II H, polypeptide 1
FTM	ENSMUSG00000063358	-0.173188	0.0350666	0.479452	0.00451176	0.0864937	0.0135974	0.380566	Mapk1	mitogen-activated protein kinase 1
FTM	ENSMUSG00000042719	-0.170375	0.00612708	0.329267	0.00457155	0.086794	0.0113682	0.365285	Naa25	N(alpha)-acetyltransferase 25, NatB auxiliary subunit
FTM	ENSMUSG00000026154	-0.275519	0.0139456	0.387834	0.00458704	0.0868215	0.0497216	0.491964	Sdhaf4	succinate dehydrogenase complex assembly factor 4
FTM	ENSMUSG00000026739	-0.197893	0.0100183	0.35765	0.00460849	0.0869207	0.0348398	0.458564	Bmi1	Bmi1 polycomb ring finger oncogene
FTM	ENSMUSG00000020034	-0.150189	0.301723	0.780235	0.00463573	0.0870809	0.0115514	0.366405	Tcp11l2	t-complex 11 (mouse) like 2
FTM	ENSMUSG00000021639	-0.252868	0.0201389	0.425673	0.00466367	0.087296	0.0106752	0.363549	Gtf2h2	general transcription factor II H, polypeptide 2
FTM	ENSMUSG00000031516	-0.202716	0.00744934	0.338145	0.00469897	0.087537	0.0147644	0.388947	Dctn6	dynactin 6
FTM	ENSMUSG00000066551	-0.166872	0.0634553	0.545288	0.00470428	0.0875664	0.0167353	0.395245	Hmgb1	high mobility group box 1
FTM	ENSMUSG00000031575	-0.240872	0.0100491	0.357755	0.00473937	0.0877891	0.0245975	0.419542	Ash2l	ash2 (absent, small, or homeotic)-like (Drosophila)
FTM	ENSMUSG00000024072	-0.194109	0.0806982	0.573475	0.00483168	0.0885121	0.0160149	0.389542	Yipf4	Yip1 domain family, member 4
FTM	ENSMUSG00000030327	-0.238007	0.0390356	0.494475	0.00485233	0.088518	0.0271382	0.431738	Necap1	NECAP endocytosis associated 1
FTM	ENSMUSG00000054387	-0.387434	0.0127357	0.376972	0.00487362	0.0885195	0.0182594	0.404149	Mdm4	transformed mouse 3T3 cell double minute 4
FTM	ENSMUSG00000046417	-0.455828	0.157719	0.672101	0.00488022	0.0885195	0.0221756	0.41455	Lrrc75a	leucine rich repeat containing 75A
FTM	ENSMUSG00000061130	-0.239639	0.0150394	0.396198	0.00492829	0.0888553	0.0122442	0.370843	Ppm1b	protein phosphatase 1B, magnesium dependent, beta isoform
FTM	ENSMUSG00000102455	-0.275062	0.186229	0.702095	0.00501995	0.0893674	0.0425932	0.474641	Tmem150a	transmembrane protein 150A
FTM	ENSMUSG00000020627	-0.666398	0.0133719	0.384368	0.00508621	0.0898991	0.0446676	0.48194	Klhl29	kelch-like 29
FTM	ENSMUSG00000015461	-0.16359	0.00878372	0.351939	0.00511941	0.0900491	0.0170256	0.397394	Atf6b	activating transcription factor 6 beta
FTM	ENSMUSG00000022912	-0.714207	0.0493289	0.525281	0.00515291	0.0901616	0.0128448	0.374767	Pros1	protein S (alpha)
FTM	ENSMUSG00000035781	-0.253365	0.0193665	0.419872	0.00516775	0.0901616	0.0278244	0.434392	R3hdm4	R3H domain containing 4
FTM	ENSMUSG00000014444	-0.30805	0.00765353	0.338937	0.00517139	0.0901824	0.0420407	0.472832	Piezo1	piezo-type mechanosensitive ion channel component 1
FTM	ENSMUSG00000028330	-0.167357	0.00850064	0.349442	0.00520527	0.0902696	0.0326738	0.454718	Ncbp1	nuclear cap binding protein subunit 1
FTM	ENSMUSG00000073702	-0.281585	0.0197841	0.422876	0.00521118	0.0902696	0.0196398	0.409137	Rpl31	ribosomal protein L31
FTM	ENSMUSG00000020088	-0.11934	0.0159776	0.400677	0.00525047	0.0903959	0.0185859	0.405862	Sar1a	SAR1 gene homolog A (S. cerevisiae)
FTM	ENSMUSG00000039191	-0.410813	0.0261876	0.448756	0.00525488	0.0903959	0.0121164	0.370843	Rbpj	recombination signal binding protein for immunoglobulin kappa J region
FTM	ENSMUSG00000031708	-0.227233	0.0113787	0.36778	0.00528272	0.0905925	0.0286383	0.437135	Tecr	trans-2,3-enoyl-CoA reductase
FTM	ENSMUSG00000031570	-0.532717	0.0159149	0.400677	0.00532498	0.0909795	0.0286928	0.437135	Ppapdc1b	phosphatidic acid phosphatase type 2 domain containing 1B
FTM	ENSMUSG00000034345	-0.318377	0.00925776	0.353839	0.00544327	0.0919356	0.0199954	0.409549	Gtf2h5	general transcription factor IIH, polypeptide 5
FTM	ENSMUSG00000015994	-0.201637	0.0275261	0.454935	0.00551808	0.0921059	0.0260259	0.426184	Fnta	farnesyltransferase, CAAX box, alpha
FTM	ENSMUSG00000062937	-0.187509	0.154552	0.669304	0.00552134	0.0921059	0.0189148	0.407587	Mtap	methylthioadenosine phosphorylase
FTM	ENSMUSG00000032712	-0.281675	0.0366378	0.486003	0.00552234	0.0921059	0.0462976	0.486615	2810474O19Rik	RIKEN cDNA 2810474O19 gene
FTM	ENSMUSG00000030747	-0.546941	0.0481545	0.521739	0.00552475	0.0921059	0.0226151	0.416176	Dgat2	diacylglycerol O-acyltransferase 2
FTM	ENSMUSG00000020386	-0.237521	0.0398304	0.497536	0.00565463	0.092895	0.0129899	0.375732	Sar1b	SAR1 gene homolog B (S. cerevisiae)
FTM	ENSMUSG00000029147	-0.106818	0.0624072	0.544143	0.00566074	0.0929172	0.0156947	0.389542	Ppm1g	protein phosphatase 1G (formerly 2C), magnesium-dependent, gamma isoform
FTM	ENSMUSG00000034190	0.0113989	0.850471	0.971184	0.00567246	0.0929467	0.0196973	0.409137	Chmp7	charged multivesicular body protein 7
FTM	ENSMUSG00000078813	-0.154388	0.0625102	0.544143	0.0056769	0.0929467	0.0129368	0.374958	Leng1	leukocyte receptor cluster (LRC) member 1
FTM	ENSMUSG00000030527	-0.243185	0.0227438	0.435759	0.00569253	0.0929467	0.0371213	0.46257	Crtc3	CREB regulated transcription coactivator 3
FTM	ENSMUSG00000053510	-0.100134	0.111522	0.617602	0.00571685	0.0930252	0.0277564	0.43412	Nrd1	nardilysin, N-arginine dibasic convertase, NRD convertase 1
FTM	ENSMUSG00000028532	-0.600094	0.0189614	0.417839	0.005727	0.093029	0.0320772	0.453461	Cachd1	cache domain containing 1
FTM	ENSMUSG00000031728	-0.312303	0.0112069	0.367606	0.00573657	0.0930716	0.0168049	0.395245	Zfp821	zinc finger protein 821
FTM	ENSMUSG00000062203	-0.179762	0.0149099	0.39478	0.0058038	0.093613	0.0207205	0.413326	Gspt1	G1 to S phase transition 1
FTM	ENSMUSG00000032340	-0.383526	0.042593	0.504756	0.005827	0.0937158	0.0173321	0.397961	Neo1	neogenin
FTM	ENSMUSG00000003873	-0.166825	0.0647369	0.546924	0.00584629	0.0937158	0.0153276	0.389542	Bax	BCL2-associated X protein
FTM	ENSMUSG00000062604	-0.12099	0.0989603	0.602766	0.00585452	0.0937158	0.0185616	0.405862	Srpk2	serine/arginine-rich protein specific kinase 2
FTM	ENSMUSG00000044340	-0.0477408	0.875209	0.976055	0.00585549	0.0937158	0.0237833	0.41803	Phlpp1	PH domain and leucine rich repeat protein phosphatase 1
FTM	ENSMUSG00000026356	-0.0733108	0.0954921	0.596762	0.00585852	0.0937158	0.0184762	0.405862	Dars	aspartyl-tRNA synthetase
FTM	ENSMUSG00000017288	-0.224094	0.0205669	0.42811	0.00587033	0.0937994	0.0136558	0.380998	Vps53	vacuolar protein sorting 53 (yeast)
FTM	ENSMUSG00000029427	-0.21918	0.0197104	0.422876	0.00591819	0.0944356	0.0163664	0.392716	Zcchc8	zinc finger, CCHC domain containing 8
FTM	ENSMUSG00000017670	-0.132838	0.0610111	0.543142	0.00594115	0.0945183	0.0146091	0.388908	Elmo2	engulfment and cell motility 2
FTM	ENSMUSG00000033475	-0.188681	0.0179224	0.412636	0.00594989	0.0945416	0.0166854	0.395245	Tomm6	translocase of outer mitochondrial membrane 6 homolog (yeast)
FTM	ENSMUSG00000041763	-0.184449	0.028666	0.458655	0.00597459	0.0946984	0.0188087	0.407275	Tpp2	tripeptidyl peptidase II
FTM	ENSMUSG00000003545	-0.513333	0.0153204	0.398112	0.00604766	0.0951751	0.0167984	0.395245	Fosb	FBJ osteosarcoma oncogene B
FTM	ENSMUSG00000038446	-0.243475	0.0098896	0.356925	0.0060569	0.0952567	0.0211756	0.413463	Cdc40	cell division cycle 40
FTM	ENSMUSG00000002396	-0.258404	0.132386	0.646255	0.00607803	0.095493	0.0161997	0.390536	Ocel1	occludin/ELL domain containing 1
FTM	ENSMUSG00000045934	-0.561742	0.0282241	0.457161	0.0061002	0.0955116	0.0154496	0.389542	Mtmr11	myotubularin related protein 11
FTM	ENSMUSG00000035713	-0.148949	0.378925	0.821506	0.00612821	0.0955116	0.018239	0.404149	Usp35	ubiquitin specific peptidase 35
FTM	ENSMUSG00000024713	-0.661658	0.0199137	0.423776	0.0061297	0.0955116	0.0207535	0.413326	Pcsk5	proprotein convertase subtilisin/kexin type 5
FTM	ENSMUSG00000044475	-0.265832	0.133483	0.646255	0.00615569	0.0956567	0.0388013	0.465688	Ascc1	activating signal cointegrator 1 complex subunit 1
FTM	ENSMUSG00000025786	-0.173602	0.0283494	0.457516	0.00619156	0.0958062	0.0250074	0.420525	Zdhhc3	zinc finger, DHHC domain containing 3
FTM	ENSMUSG00000042670	-0.194263	0.054355	0.533198	0.00629517	0.0965774	0.0165238	0.393497	Immp1l	IMP1 inner mitochondrial membrane peptidase-like (S. cerevisiae)
FTM	ENSMUSG00000031622	-0.261295	0.0133207	0.384351	0.00630157	0.0966124	0.0187717	0.407103	Sin3b	transcriptional regulator, SIN3B (yeast)
FTM	ENSMUSG00000075467	-0.163806	0.532113	0.886353	0.0063097	0.0967055	0.0197341	0.409137	Dnlz	DNL-type zinc finger
FTM	ENSMUSG00000055239	-0.129587	0.0188024	0.417759	0.00632824	0.096804	0.0201811	0.41016	Kcmf1	potassium channel modulatory factor 1
FTM	ENSMUSG00000068417	-0.73884	0.0178671	0.412579	0.00642046	0.0971475	0.0260899	0.426279	Pnp2	purine-nucleoside phosphorylase 2
FTM	ENSMUSG00000026603	-0.349876	0.0552411	0.535804	0.00642087	0.0971475	0.023337	0.417729	Smyd2	SET and MYND domain containing 2
FTM	ENSMUSG00000033653	-0.212874	0.0942281	0.5964	0.0064225	0.0971475	0.0199166	0.409137	Vps8	vacuolar protein sorting 8 homolog (S. cerevisiae)
FTM	ENSMUSG00000039377	-0.421907	0.0186029	0.417255	0.00642749	0.0971475	0.0233545	0.417729	Hlx	H2.0-like homeobox
FTM	ENSMUSG00000022451	-0.241678	0.0122032	0.375164	0.00644113	0.0971475	0.0180866	0.403937	Twf1	twinfilin, actin-binding protein, homolog 1 (Drosophila)
FTM	ENSMUSG00000048376	-0.42457	0.125085	0.635304	0.0065467	0.0980115	0.0373671	0.46257	F2r	coagulation factor II (thrombin) receptor
FTM	ENSMUSG00000002064	-0.157395	0.114286	0.621757	0.00656312	0.0980292	0.013611	0.380566	Sdf2	stromal cell derived factor 2
FTM	ENSMUSG00000019929	-1.68228	0.0301914	0.463791	0.00657572	0.098084	0.033394	0.456863	Dcn	decorin
FTM	ENSMUSG00000038991	-0.225691	0.0131266	0.382431	0.0065818	0.098084	0.0166684	0.395245	Txndc5	thioredoxin domain containing 5
FTM	ENSMUSG00000032050	-0.174748	0.0774582	0.568796	0.00663154	0.0983439	0.0496487	0.491964	Rdx	radixin
FTM	ENSMUSG00000022235	-0.67128	0.04139	0.501459	0.00663238	0.0983439	0.0290238	0.438816	Cmbl	carboxymethylenebutenolidase-like (Pseudomonas)
FTM	ENSMUSG00000023965	-0.205792	0.0217166	0.430013	0.00667414	0.098543	0.0191419	0.407587	Fbxl17	F-box and leucine-rich repeat protein 17
FTM	ENSMUSG00000036241	-0.173592	0.0629971	0.544264	0.00667732	0.098543	0.0202138	0.41016	Ube2r2	ubiquitin-conjugating enzyme E2R 2
FTM	ENSMUSG00000040415	-0.217924	0.11076	0.616305	0.006733	0.0988061	0.0230894	0.417729	Dtx3	deltex 3 homolog (Drosophila)
FTM	ENSMUSG00000026439	-0.208926	0.0420542	0.503461	0.00677717	0.099091	0.0215993	0.413779	Rbbp5	retinoblastoma binding protein 5
FTM	ENSMUSG00000029911	-0.219318	0.0320729	0.471503	0.00679196	0.0991293	0.0228287	0.41667	Ssbp1	single-stranded DNA binding protein 1
FTM	ENSMUSG00000007655	-0.731887	0.0141016	0.387834	0.00684769	0.0992861	0.0444632	0.481172	Cav1	caveolin 1, caveolae protein
FTM	ENSMUSG00000034173	-0.281994	0.0425182	0.504756	0.00686391	0.099408	0.0155381	0.389542	Zbed5	zinc finger, BED type containing 5
FTM	ENSMUSG00000038564	-0.201768	0.0865781	0.583852	0.00686507	0.099408	0.0204874	0.411721	Ift172	intraflagellar transport 172
FTM	ENSMUSG00000042182	-0.560571	0.0104146	0.362141	0.00689285	0.0995551	0.0287865	0.437135	Bend6	BEN domain containing 6
FTM	ENSMUSG00000051650	-0.326965	0.115428	0.623109	0.00690825	0.0995551	0.0158923	0.389542	B3gnt2	UDP-GlcNAc:betaGal beta-1,3-N-acetylglucosaminyltransferase 2
FTM	ENSMUSG00000070056	-0.42535	0.0100519	0.357755	0.0069305	0.0995551	0.018868	0.407432	Mfhas1	malignant fibrous histiocytoma amplified sequence 1
FTM	ENSMUSG00000036023	-0.250303	0.020836	0.428756	0.00696007	0.0997653	0.0188886	0.407587	Parp2	poly (ADP-ribose) polymerase family, member 2
FTM	ENSMUSG00000046034	-0.160046	0.201276	0.715473	0.00697393	0.0998448	0.025223	0.421492	Otulin	OTU deubiquitinase with linear linkage specificity
FTM	ENSMUSG00000043257	-0.131786	0.209925	0.721584	0.00701583	0.100061	0.0190927	0.407587	Pigv	phosphatidylinositol glycan anchor biosynthesis, class V
FTM	ENSMUSG00000027611	-0.697651	0.0375163	0.489843	0.00702027	0.100061	0.0179811	0.403281	Procr	protein C receptor, endothelial
FTM	ENSMUSG00000047554	-0.168806	0.0701987	0.556668	0.00710151	0.100517	0.0247776	0.419542	Tmem41b	transmembrane protein 41B
FTM	ENSMUSG00000025402	-0.18938	0.0503067	0.525562	0.00713794	0.100517	0.0448371	0.482666	Nab2	Ngfi-A binding protein 2
FTM	ENSMUSG00000020309	-0.276632	0.0620782	0.544143	0.00714815	0.10059	0.023875	0.41803	Chac2	ChaC, cation transport regulator 2
FTM	ENSMUSG00000022750	-0.013151	0.928055	0.986235	0.00719302	0.100829	0.0187969	0.407275	Klhl22	kelch-like 22
FTM	ENSMUSG00000021775	-0.262716	0.0208875	0.428756	0.00722807	0.101139	0.022334	0.41475	Nr1d2	nuclear receptor subfamily 1, group D, member 2
FTM	ENSMUSG00000046897	-0.268997	0.0190994	0.419179	0.00723649	0.101197	0.0320997	0.453461	Zfp740	zinc finger protein 740
FTM	ENSMUSG00000022770	-0.214888	0.0799596	0.572386	0.00725067	0.101238	0.0151862	0.389542	Dlg1	discs, large homolog 1 (Drosophila)
FTM	ENSMUSG00000031353	-0.206849	0.064062	0.54682	0.00725926	0.101238	0.0417128	0.472421	Rbbp7	retinoblastoma binding protein 7
FTM	ENSMUSG00000022131	-0.326983	0.0843306	0.580143	0.00732152	0.101584	0.0208785	0.413369	Gpr180	G protein-coupled receptor 180
FTM	ENSMUSG00000048007	-0.25517	0.00926335	0.353839	0.00735358	0.10168	0.0154333	0.389542	Timm8a1	translocase of inner mitochondrial membrane 8A1
FTM	ENSMUSG00000033863	-0.382838	0.031444	0.469173	0.00735556	0.10168	0.0189816	0.407587	Klf9	Kruppel-like factor 9
FTM	ENSMUSG00000078440	-0.197769	0.0733014	0.56204	0.00744332	0.102212	0.0164938	0.393288	Dohh	deoxyhypusine hydroxylase/monooxygenase
FTM	ENSMUSG00000022808	-0.157611	0.0804707	0.57331	0.00746871	0.102311	0.0211966	0.413463	Snx4	sorting nexin 4
FTM	ENSMUSG00000034893	-0.135008	0.108398	0.613848	0.00748899	0.102379	0.0214216	0.413779	Cog3	component of oligomeric golgi complex 3
FTM	ENSMUSG00000091900	-0.165789	0.198338	0.713336	0.00752032	0.102479	0.0252364	0.421492	Gm4353	predicted gene 4353
FTM	ENSMUSG00000026483	-0.488342	0.0771403	0.568559	0.00755024	0.10264	0.0210134	0.413463	Fam129a	family with sequence similarity 129, member A
FTM	ENSMUSG00000034194	-0.181377	0.257313	0.753146	0.00760833	0.102754	0.0210873	0.413463	R3hcc1	R3H domain and coiled-coil containing 1
FTM	ENSMUSG00000017686	-0.121428	0.0251497	0.445025	0.00762982	0.102926	0.0201287	0.41016	Rhot1	ras homolog gene family, member T1
FTM	ENSMUSG00000003031	-0.204838	0.0362081	0.484547	0.00766484	0.103037	0.0175491	0.39986	Cdkn1b	cyclin-dependent kinase inhibitor 1B
FTM	ENSMUSG00000078128	-0.13128	0.0500163	0.525401	0.00768414	0.103037	0.0351033	0.458626	Gm2178	predicted gene 2178
FTM	ENSMUSG00000028433	-0.23043	0.021552	0.429987	0.00772534	0.103037	0.0468655	0.486615	Ubap2	ubiquitin-associated protein 2
FTM	ENSMUSG00000031818	-0.200576	0.0289828	0.460559	0.00773952	0.103037	0.02398	0.41803	Cox4i1	cytochrome c oxidase subunit IV isoform 1
FTM	ENSMUSG00000004233	-0.424271	0.0245183	0.442744	0.00774169	0.103037	0.0194803	0.408807	Wars2	tryptophanyl tRNA synthetase 2 (mitochondrial)
FTM	ENSMUSG00000006299	-0.0909073	0.175775	0.689972	0.00781683	0.103461	0.0213353	0.413779	Aamp	angio-associated migratory protein
FTM	ENSMUSG00000059363	-0.223377	0.0597662	0.542179	0.00786294	0.103571	0.0202175	0.41016	Fxn	frataxin
FTM	ENSMUSG00000079677	-0.195446	0.170031	0.682951	0.00791754	0.103715	0.0445386	0.481554	Fdx1l	ferredoxin 1-like
FTM	ENSMUSG00000022031	-0.367773	0.0247797	0.442986	0.00792209	0.103715	0.0469093	0.486615	Elp3	elongator acetyltransferase complex subunit 3
FTM	ENSMUSG00000030704	-0.189462	0.0161443	0.401214	0.00792779	0.103715	0.0476758	0.487646	Rab6a	RAB6A, member RAS oncogene family
FTM	ENSMUSG00000020128	-0.205362	0.0236512	0.438817	0.00796886	0.103801	0.0240976	0.418257	Vps54	vacuolar protein sorting 54 (yeast)
FTM	ENSMUSG00000064345	-1.25659	0.240618	0.742049	0.00797409	0.103828	0.0459278	0.486091	mt-Nd2	mitochondrially encoded NADH dehydrogenase 2
FTM	ENSMUSG00000015889	-0.321507	0.044684	0.511707	0.00798686	0.103828	0.0272062	0.431922	Lta4h	leukotriene A4 hydrolase
FTM	ENSMUSG00000040782	-0.246867	0.0261069	0.448756	0.00798984	0.103828	0.0286027	0.437135	Rfwd2	ring finger and WD repeat domain 2
FTM	ENSMUSG00000032965	-0.248522	0.0126328	0.375823	0.00802576	0.103908	0.0235672	0.418029	Ift57	intraflagellar transport 57
FTM	ENSMUSG00000025950	-0.320329	0.04708	0.520679	0.00803687	0.103928	0.0191168	0.407587	Idh1	isocitrate dehydrogenase 1 (NADP+), soluble
FTM	ENSMUSG00000038520	-0.150881	0.034315	0.478356	0.00805535	0.104004	0.0229606	0.417138	Tbc1d17	TBC1 domain family, member 17
FTM	ENSMUSG00000027303	-0.152638	0.0748792	0.565145	0.00813372	0.104481	0.0231983	0.417729	Ptpra	protein tyrosine phosphatase, receptor type, A
FTM	ENSMUSG00000017299	-0.173287	0.0453621	0.514461	0.00818093	0.104632	0.0235842	0.418029	Dnttip1	deoxynucleotidyltransferase, terminal, interacting protein 1
FTM	ENSMUSG00000066415	-0.210379	0.0262988	0.448756	0.00819949	0.104685	0.0367845	0.46257	Msl2	male-specific lethal 2 homolog (Drosophila)
FTM	ENSMUSG00000027534	-0.23027	0.0516887	0.528194	0.00820726	0.104725	0.0455719	0.484357	Snx16	sorting nexin 16
FTM	ENSMUSG00000035274	-0.185739	0.220458	0.728551	0.00821156	0.104725	0.024722	0.419542	Tpbg	trophoblast glycoprotein
FTM	ENSMUSG00000038733	-0.145698	0.122024	0.631789	0.00827174	0.104781	0.0441785	0.480635	Wdr26	WD repeat domain 26
FTM	ENSMUSG00000033739	-0.497737	0.0412855	0.501232	0.00830118	0.104899	0.0250102	0.420525	Fkbpl	FK506 binding protein-like
FTM	ENSMUSG00000015165	-0.0900613	0.0403934	0.498493	0.00833287	0.104916	0.0282983	0.435601	Hnrnpl	heterogeneous nuclear ribonucleoprotein L
FTM	ENSMUSG00000029571	-0.249556	0.0336109	0.476793	0.00847309	0.105406	0.0447255	0.482454	Tmem106b	transmembrane protein 106B
FTM	ENSMUSG00000030706	-0.185123	0.0575214	0.540644	0.00850103	0.105406	0.0377549	0.462648	Mrpl48	mitochondrial ribosomal protein L48
FTM	ENSMUSG00000042700	-0.327326	0.0265073	0.449724	0.00857192	0.105785	0.0260732	0.426279	Sipa1l1	signal-induced proliferation-associated 1 like 1
FTM	ENSMUSG00000015488	-0.368123	0.119224	0.628741	0.00857636	0.105785	0.043883	0.479151	Cacfd1	calcium channel flower domain containing 1
FTM	ENSMUSG00000069833	-0.203211	0.0594032	0.542072	0.00859917	0.105907	0.0226815	0.416439	Ahnak	AHNAK nucleoprotein (desmoyokin)
FTM	ENSMUSG00000064317	-0.151724	0.0282	0.457161	0.00862668	0.105933	0.0465225	0.486615	Gm10146	predicted gene 10146
FTM	ENSMUSG00000025544	-0.102288	0.0665896	0.55054	0.00863012	0.105947	0.0172018	0.397961	Tm9sf2	transmembrane 9 superfamily member 2
FTM	ENSMUSG00000022003	-0.360139	0.0223502	0.432525	0.00865023	0.105975	0.0456623	0.484805	Slc25a30	solute carrier family 25, member 30
FTM	ENSMUSG00000028729	-0.167682	0.0526157	0.530708	0.00865588	0.105975	0.0268525	0.431118	Ebna1bp2	EBNA1 binding protein 2
FTM	ENSMUSG00000044864	-0.522611	0.0136567	0.385478	0.00868636	0.105975	0.0232	0.417729	Ankrd50	ankyrin repeat domain 50
FTM	ENSMUSG00000041975	-0.228955	0.223715	0.73099	0.00871187	0.105975	0.017949	0.403281	Mettl8	methyltransferase like 8
FTM	ENSMUSG00000044600	-0.207839	0.0781169	0.569231	0.00871439	0.105975	0.0254655	0.422304	Smim7	small integral membrane protein 7
FTM	ENSMUSG00000000167	-0.396931	0.0456071	0.514601	0.00880073	0.106138	0.0282531	0.435601	Pih1d2	PIH1 domain containing 2
FTM	ENSMUSG00000024817	-0.22787	0.0714907	0.558488	0.00886406	0.106339	0.0244711	0.418823	Uhrf2	ubiquitin-like, containing PHD and RING finger domains 2
FTM	ENSMUSG00000068391	-0.372391	0.0218127	0.430013	0.00891692	0.106691	0.0243326	0.418447	Chrac1	chromatin accessibility complex 1
FTM	ENSMUSG00000005625	-0.12756	0.0389125	0.493453	0.00892929	0.106772	0.0219599	0.414499	Psmd4	proteasome (prosome, macropain) 26S subunit, non-ATPase, 4
FTM	ENSMUSG00000040690	-0.223198	0.248061	0.747247	0.00895723	0.106828	0.0416973	0.472421	Col16a1	collagen, type XVI, alpha 1
FTM	ENSMUSG00000046032	-0.21615	0.0247785	0.442986	0.00896512	0.106828	0.0330126	0.456085	Snx12	sorting nexin 12
FTM	ENSMUSG00000058318	-0.135974	0.0280923	0.457161	0.00899817	0.106833	0.0237555	0.41803	Phf21a	PHD finger protein 21A
FTM	ENSMUSG00000022792	-0.275834	0.0696392	0.556244	0.0090161	0.106931	0.0287958	0.437135	Yars2	tyrosyl-tRNA synthetase 2 (mitochondrial)
FTM	ENSMUSG00000034566	-0.107529	0.0928265	0.594008	0.00902308	0.106931	0.0223133	0.41475	Atp5h	ATP synthase, H+ transporting, mitochondrial F0 complex, subunit D
FTM	ENSMUSG00000001156	-0.272594	0.0582181	0.540697	0.00902512	0.106931	0.0353227	0.458834	Mxd1	MAX dimerization protein 1
FTM	ENSMUSG00000024043	-0.4654	0.0817292	0.575457	0.00908514	0.107128	0.0380519	0.463865	Arhgap28	Rho GTPase activating protein 28
FTM	ENSMUSG00000031659	-0.414617	0.0793395	0.571278	0.00926558	0.107926	0.0371359	0.46257	Adcy7	adenylate cyclase 7
FTM	ENSMUSG00000032305	-0.297147	0.0148438	0.394526	0.00934384	0.108442	0.0462868	0.486615	Fam219b	family with sequence similarity 219, member B
FTM	ENSMUSG00000084883	-0.471258	0.0326279	0.473696	0.00939518	0.108806	0.0319336	0.452771	Ccdc85c	coiled-coil domain containing 85C
FTM	ENSMUSG00000016520	-0.142032	0.237186	0.739188	0.00951166	0.10916	0.0270616	0.431738	Lnx2	ligand of numb-protein X 2
FTM	ENSMUSG00000063296	-0.373449	0.0771603	0.568559	0.00952226	0.109163	0.0246729	0.419542	Tmem117	transmembrane protein 117
FTM	ENSMUSG00000024427	-0.321396	0.129131	0.641739	0.00957503	0.10926	0.0424328	0.474533	Spry4	sprouty homolog 4 (Drosophila)
FTM	ENSMUSG00000079418	-0.211252	0.0502856	0.525562	0.00966376	0.10976	0.0256648	0.423492	Atg4a	autophagy related 4A, cysteine peptidase
FTM	ENSMUSG00000018931	-0.249947	0.0630887	0.544313	0.00968681	0.109847	0.0255613	0.423182	Natd1	N-acetyltransferase domain containing 1
FTM	ENSMUSG00000032419	-0.112446	0.410356	0.837762	0.00979293	0.110273	0.0275688	0.433865	Tbx18	T-box18
FTM	ENSMUSG00000023074	-0.229566	0.051288	0.527057	0.00979818	0.110306	0.0326574	0.454718	Mospd1	motile sperm domain containing 1
FTM	ENSMUSG00000035232	-0.235338	0.259051	0.753545	0.00982925	0.110453	0.0204294	0.411608	Pdk3	pyruvate dehydrogenase kinase, isoenzyme 3
FTM	ENSMUSG00000025782	-0.118932	0.0906389	0.590946	0.00984751	0.110539	0.0252601	0.421555	Taf3	TAF3 RNA polymerase II, TATA box binding protein (TBP)-associated factor
FTM	ENSMUSG00000019944	-0.321761	0.216604	0.726271	0.00991079	0.1108	0.0244335	0.418823	Rhobtb1	Rho-related BTB domain containing 1
FTM	ENSMUSG00000094870	-0.223987	0.0308629	0.466422	0.00993242	0.110822	0.0389838	0.465688	Zfp131	zinc finger protein 131
FTM	ENSMUSG00000022811	-0.128068	0.129018	0.641467	0.00996526	0.110935	0.0483473	0.489948	Zfp148	zinc finger protein 148
FTM	ENSMUSG00000031422	-0.166253	0.0358997	0.483332	0.00996753	0.110935	0.0201838	0.41016	Morf4l2	mortality factor 4 like 2
FTM	ENSMUSG00000032314	-0.136522	0.065122	0.547653	0.00999262	0.111057	0.0259193	0.425715	Etfa	electron transferring flavoprotein, alpha polypeptide

## Sheet: D. MLres
Trait	Gene ID	coef.all	p value.all	q value.all	p value.robust	q value.robust	p value.max	q value.max	Symbol	Description
MLres	ENSMUSG00000041319	0.508074	5.92312e-06	0.0556122	5.16637e-06	0.0173239	0.000395594	0.231034	Thoc6	THO complex 6 homolog (Drosophila)
MLres	ENSMUSG00000024384	0.550558	9.55921e-05	0.13423	6.43363e-06	0.0177663	0.000183363	0.231034	Iws1	IWS1 homolog (S. cerevisiae)
MLres	ENSMUSG00000041949	0.698581	0.000969637	0.227375	1.55138e-05	0.0246442	0.000409791	0.231034	Tango6	transport and golgi organization 6
MLres	ENSMUSG00000026547	0.618099	0.000293603	0.177749	1.61655e-05	0.0246442	0.000905814	0.254225	Tagln2	transgelin 2
MLres	ENSMUSG00000028228	0.867603	0.00524152	0.320173	1.66061e-05	0.0246442	0.000170945	0.231034	Cpne3	copine III
MLres	ENSMUSG00000007589	0.987146	0.000253661	0.172581	4.24592e-05	0.0293125	0.000414395	0.231034	Tinf2	Terf1 (TRF1)-interacting nuclear factor 2
MLres	ENSMUSG00000024925	0.931874	0.00141562	0.2489	5.72625e-05	0.0317868	0.00344115	0.322444	Rnaseh2c	ribonuclease H2, subunit C
MLres	ENSMUSG00000031099	2.16386	0.000130426	0.146935	6.99508e-05	0.0324455	0.00175277	0.288518	Smarca1	SWI/SNF related, matrix associated, actin dependent regulator of chromatin, subfamily a, member 1
MLres	ENSMUSG00000038976	0.498255	6.32859e-05	0.127827	7.6905e-05	0.0324455	0.00184193	0.295118	Ppp1r9b	protein phosphatase 1, regulatory subunit 9B
MLres	ENSMUSG00000005534	0.730547	0.000398398	0.183361	7.99963e-05	0.0324455	0.00431204	0.327554	Insr	insulin receptor
MLres	ENSMUSG00000022360	0.614287	0.0368034	0.487098	8.18976e-05	0.0324455	0.000559087	0.238146	Atad2	ATPase family, AAA domain containing 2
MLres	ENSMUSG00000030530	0.54309	0.0106005	0.363507	9.09217e-05	0.0324455	0.00212122	0.302102	Furin	furin (paired basic amino acid cleaving enzyme)
MLres	ENSMUSG00000041126	0.765223	0.000471499	0.191387	9.17051e-05	0.0324455	0.00281854	0.31317	H2afv	H2A histone family, member V
MLres	ENSMUSG00000036281	0.244347	0.098793	0.602493	9.33115e-05	0.0324457	0.00793023	0.354173	Snapc4	small nuclear RNA activating complex, polypeptide 4
MLres	ENSMUSG00000052423	0.552543	0.0243068	0.44145	9.6391e-05	0.0324457	0.000350884	0.231034	B4galt3	UDP-Gal:betaGlcNAc beta 1,4-galactosyltransferase, polypeptide 3
MLres	ENSMUSG00000021483	0.666503	0.0227459	0.435759	0.000120184	0.0339881	0.00209546	0.302102	Cdk20	cyclin-dependent kinase 20
MLres	ENSMUSG00000033060	1.33465	0.00196287	0.27182	0.000143408	0.0342316	0.00137499	0.272256	Lmo7	LIM domain only 7
MLres	ENSMUSG00000021594	1.20522	0.0123051	0.375164	0.000143521	0.0342316	0.00180482	0.291159	Srd5a1	steroid 5 alpha-reductase 1
MLres	ENSMUSG00000031371	1.14566	0.00289918	0.288351	0.000147775	0.0344497	0.00210781	0.302102	Haus7	HAUS augmin-like complex, subunit 7
MLres	ENSMUSG00000029482	0.712916	0.0634127	0.545288	0.000150989	0.0345765	0.0100269	0.358502	Aacs	acetoacetyl-CoA synthetase
MLres	ENSMUSG00000032178	0.274611	0.00277052	0.286946	0.000157343	0.0350996	0.00569595	0.338048	Ilf3	interleukin enhancer binding factor 3
MLres	ENSMUSG00000020069	0.245398	0.243615	0.744394	0.000193438	0.0369805	0.00160525	0.276893	Hnrnph3	heterogeneous nuclear ribonucleoprotein H3
MLres	ENSMUSG00000021339	0.918059	0.000418878	0.188773	0.000203187	0.0369805	0.00206229	0.302102	Mrs2	MRS2 magnesium homeostasis factor homolog (S. cerevisiae)
MLres	ENSMUSG00000034342	0.683922	0.0359999	0.483332	0.000209882	0.0370322	0.00285742	0.31317	Cbl	Casitas B-lineage lymphoma
MLres	ENSMUSG00000022142	0.313317	0.141671	0.656214	0.000211864	0.0370322	0.00921744	0.357379	Nup155	nucleoporin 155
MLres	ENSMUSG00000010663	0.834869	0.00283999	0.288236	0.000235869	0.0382654	0.00360026	0.322742	Fads1	fatty acid desaturase 1
MLres	ENSMUSG00000023345	0.812767	0.00264578	0.286941	0.000238655	0.0382654	0.0168243	0.39543	Poc1a	POC1 centriolar protein homolog A (Chlamydomonas)
MLres	ENSMUSG00000056201	0.296733	0.000738201	0.213919	0.000267518	0.03919	0.00268958	0.311381	Cfl1	cofilin 1, non-muscle
MLres	ENSMUSG00000033589	0.619319	0.000918031	0.2262	0.00026844	0.03919	0.00641955	0.345056	Reep4	receptor accessory protein 4
MLres	ENSMUSG00000062480	0.915358	0.00120475	0.237099	0.000316423	0.0411482	0.00503082	0.331599	Acat3	acetyl-Coenzyme A acetyltransferase 3
MLres	ENSMUSG00000052906	0.457533	0.0840473	0.579554	0.000319649	0.0411772	0.00397844	0.322742	Ubxn8	UBX domain protein 8
MLres	ENSMUSG00000007038	0.637592	0.00531262	0.322014	0.000325501	0.0414109	0.00317518	0.315622	Neu1	neuraminidase 1
MLres	ENSMUSG00000028454	0.84236	0.0010513	0.232885	0.00033406	0.0417086	0.00157663	0.276893	Pigo	phosphatidylinositol glycan anchor biosynthesis, class O
MLres	ENSMUSG00000031709	1.0043	0.00152415	0.256078	0.000336615	0.0419161	0.00746832	0.351655	Tbc1d9	TBC1 domain family, member 9
MLres	ENSMUSG00000021670	0.541264	0.0112501	0.367606	0.000361863	0.0429618	0.00459134	0.331599	Hmgcr	3-hydroxy-3-methylglutaryl-Coenzyme A reductase
MLres	ENSMUSG00000023764	0.665371	0.0065407	0.331155	0.000394839	0.0436404	0.00508817	0.331899	Sfi1	Sfi1 homolog, spindle assembly associated (yeast)
MLres	ENSMUSG00000027575	0.458557	0.00100025	0.227946	0.00039888	0.0436404	0.00491926	0.331599	Arfgap1	ADP-ribosylation factor GTPase activating protein 1
MLres	ENSMUSG00000049502	1.46711	0.00144839	0.250903	0.000401547	0.0436404	0.00206711	0.302102	Dtx3l	deltex 3-like (Drosophila)
MLres	ENSMUSG00000042364	0.509426	0.00273194	0.286941	0.000439026	0.0448647	0.00982801	0.357379	Snx18	sorting nexin 18
MLres	ENSMUSG00000000085	0.477038	0.00525154	0.320173	0.000467817	0.0457535	0.00555903	0.336731	Scmh1	sex comb on midleg homolog 1
MLres	ENSMUSG00000036879	0.655218	0.0067455	0.332793	0.000491858	0.046336	0.0221855	0.41455	Phkb	phosphorylase kinase beta
MLres	ENSMUSG00000091803	0.585509	0.00741765	0.338145	0.000496641	0.046336	0.00532279	0.3339	Cox16	cytochrome c oxidase assembly protein 16
MLres	ENSMUSG00000020843	0.504153	0.00988745	0.356925	0.000536063	0.0478424	0.00538125	0.3346	Timm22	translocase of inner mitochondrial membrane 22
MLres	ENSMUSG00000026779	0.62715	0.0275739	0.454935	0.000540863	0.0480522	0.0228534	0.41667	Mastl	microtubule associated serine/threonine kinase-like
MLres	ENSMUSG00000043445	0.351075	0.00663577	0.33226	0.000548308	0.0481395	0.00797792	0.354173	Pgp	phosphoglycolate phosphatase
MLres	ENSMUSG00000035337	0.593039	0.00272729	0.286941	0.000563606	0.0484406	0.0269243	0.431443	Uchl4	ubiquitin carboxyl-terminal esterase L4
MLres	ENSMUSG00000009614	1.21548	0.00274252	0.286941	0.000570618	0.0484406	0.00723386	0.350865	Sardh	sarcosine dehydrogenase
MLres	ENSMUSG00000002068	0.732014	0.0161213	0.401214	0.000575195	0.0484881	0.0163959	0.392879	Ccne1	cyclin E1
MLres	ENSMUSG00000022972	0.576441	0.00547029	0.323475	0.000583756	0.0488493	0.00257391	0.309889	1110004E09Rik	RIKEN cDNA 1110004E09 gene
MLres	ENSMUSG00000026213	0.625482	0.000951192	0.2262	0.000592773	0.0491615	0.00332683	0.318607	Stk11ip	serine/threonine kinase 11 interacting protein
MLres	ENSMUSG00000071655	0.369017	0.00107619	0.232885	0.000594882	0.0491615	0.0073915	0.351564	Ubxn1	UBX domain protein 1
MLres	ENSMUSG00000020415	1.12505	0.00944478	0.355301	0.000599635	0.0493857	0.00825044	0.356022	Pttg1	pituitary tumor-transforming gene 1
MLres	ENSMUSG00000015341	0.417952	0.00203978	0.272301	0.000604541	0.049555	0.00586267	0.339387	Golga7	golgi autoantigen, golgin subfamily a, 7
MLres	ENSMUSG00000025764	1.03338	0.00216614	0.275581	0.000604857	0.049555	0.00349663	0.322742	Jade1	jade family PHD finger 1
MLres	ENSMUSG00000024219	0.516292	0.00107455	0.232885	0.000633317	0.0503064	0.0122013	0.370843	Anks1	ankyrin repeat and SAM domain containing 1
MLres	ENSMUSG00000034259	0.378541	0.00319893	0.292544	0.000660777	0.0509714	0.0216284	0.413779	Exosc4	exosome component 4
MLres	ENSMUSG00000037824	0.317581	0.113232	0.620277	0.000661185	0.0509714	0.00840562	0.35606	Tspan14	tetraspanin 14
MLres	ENSMUSG00000039967	0.417624	0.00520365	0.320173	0.0006679	0.0509714	0.00762233	0.352572	Zfp292	zinc finger protein 292
MLres	ENSMUSG00000058454	0.739454	0.0536136	0.53169	0.000680085	0.0509714	0.0339794	0.457281	Dhcr7	7-dehydrocholesterol reductase
MLres	ENSMUSG00000041879	0.414563	0.0140915	0.387834	0.000680367	0.0509714	0.00799773	0.354173	Ipo9	importin 9
MLres	ENSMUSG00000038650	0.956445	0.0119018	0.373731	0.000688377	0.0509714	0.00970527	0.357379	Rnh1	ribonuclease/angiogenin inhibitor 1
MLres	ENSMUSG00000024127	0.812683	0.0037129	0.300275	0.000694363	0.0510722	0.0064682	0.345056	Prepl	prolyl endopeptidase-like
MLres	ENSMUSG00000003549	0.391538	0.00682229	0.333965	0.000694419	0.0510722	0.00528823	0.333059	Ercc1	excision repair cross-complementing rodent repair deficiency, complementation group 1
MLres	ENSMUSG00000066979	0.535759	0.00117458	0.236654	0.00072306	0.051744	0.0230992	0.417729	Bub3	budding uninhibited by benzimidazoles 3 homolog (S. cerevisiae)
MLres	ENSMUSG00000029416	0.416668	0.160578	0.674453	0.000730768	0.0518259	0.00292153	0.31317	Slc15a4	solute carrier family 15, member 4
MLres	ENSMUSG00000030697	0.244228	0.00383522	0.302792	0.000734139	0.0518259	0.034551	0.458471	Ppp4c	protein phosphatase 4, catalytic subunit
MLres	ENSMUSG00000028670	0.432834	0.0165598	0.402807	0.000736784	0.0519344	0.00384389	0.322742	Lypla2	lysophospholipase 2
MLres	ENSMUSG00000031827	1.66878	0.00324265	0.294675	0.000751341	0.0525468	0.00679152	0.348573	Cotl1	coactosin-like 1 (Dictyostelium)
MLres	ENSMUSG00000023908	0.846316	0.00335473	0.295166	0.000766479	0.0528891	0.039298	0.465869	Pkmyt1	protein kinase, membrane associated tyrosine/threonine 1
MLres	ENSMUSG00000035278	0.259667	0.0031412	0.292544	0.000821118	0.0534638	0.0069982	0.348758	Plekhj1	pleckstrin homology domain containing, family J member 1
MLres	ENSMUSG00000024829	0.35462	0.0144714	0.392693	0.000859981	0.0542256	0.0239498	0.41803	Mrpl21	mitochondrial ribosomal protein L21
MLres	ENSMUSG00000052605	0.470283	0.066475	0.550156	0.000903191	0.0548516	0.0155641	0.389542	Isoc2b	isochorismatase domain containing 2b
MLres	ENSMUSG00000029022	0.982977	0.00209685	0.273435	0.000907375	0.0549635	0.0100082	0.358454	Miip	migration and invasion inhibitory protein
MLres	ENSMUSG00000019590	1.13919	0.0335879	0.476793	0.000928846	0.0553332	0.0210126	0.413463	Cyb561	cytochrome b-561
MLres	ENSMUSG00000062012	0.558177	0.0127326	0.376972	0.00100606	0.0565625	0.00753815	0.352572	Zfp13	zinc finger protein 13
MLres	ENSMUSG00000071337	0.337683	0.00452896	0.316162	0.00103757	0.0568144	0.0191922	0.407587	Tia1	cytotoxic granule-associated RNA binding protein 1
MLres	ENSMUSG00000039367	0.183278	0.00721438	0.335342	0.00107993	0.0571679	0.0121819	0.370843	Sec24c	Sec24 related gene family, member C (S. cerevisiae)
MLres	ENSMUSG00000047264	0.666211	0.0301206	0.463791	0.00108493	0.0572913	0.0208095	0.413369	Zfp358	zinc finger protein 358
MLres	ENSMUSG00000035958	0.643557	0.011015	0.367178	0.00113311	0.0578195	0.0152916	0.389542	Tdp2	tyrosyl-DNA phosphodiesterase 2
MLres	ENSMUSG00000020549	0.333838	0.0694802	0.556244	0.00113744	0.0579772	0.0209029	0.413369	Elac2	elaC homolog 2 (E. coli)
MLres	ENSMUSG00000039781	0.718566	0.00473352	0.318265	0.00115472	0.058344	0.023927	0.41803	Cep131	centrosomal protein 131
MLres	ENSMUSG00000024997	0.315653	0.00608836	0.329267	0.00116176	0.058344	0.0148486	0.389297	Prdx3	peroxiredoxin 3
MLres	ENSMUSG00000040428	0.790551	0.104938	0.609543	0.00117182	0.058344	0.0404583	0.46805	Plekha4	pleckstrin homology domain containing, family A (phosphoinositide binding specific) member 4
MLres	ENSMUSG00000005674	0.491097	0.0161724	0.401357	0.00118023	0.0583843	0.00587206	0.339387	Tomm40l	translocase of outer mitochondrial membrane 40 homolog-like (yeast)
MLres	ENSMUSG00000025169	0.26772	0.396726	0.831356	0.00118473	0.0583843	0.0270987	0.431738	Ogfod3	2-oxoglutarate and iron-dependent oxygenase domain containing 3
MLres	ENSMUSG00000039735	1.16589	0.0102331	0.360315	0.00121085	0.0585295	0.025007	0.420525	Fnbp1l	formin binding protein 1-like
MLres	ENSMUSG00000036686	0.212264	0.011515	0.368429	0.00125537	0.0589938	0.034216	0.457757	Cc2d1a	coiled-coil and C2 domain containing 1A
MLres	ENSMUSG00000034274	0.457417	0.0113477	0.367606	0.00125692	0.0589938	0.0130918	0.377052	Thoc5	THO complex 5
MLres	ENSMUSG00000002496	0.40997	0.0123879	0.375823	0.00126327	0.0589938	0.0104902	0.362591	Tsc2	tuberous sclerosis 2
MLres	ENSMUSG00000009418	1.10328	0.00270725	0.286941	0.00129452	0.0590617	0.0126706	0.373396	Nav1	neuron navigator 1
MLres	ENSMUSG00000002963	0.415364	0.00296948	0.292248	0.00132444	0.0594984	0.0115863	0.366468	Pnkp	polynucleotide kinase 3'- phosphatase
MLres	ENSMUSG00000090290	0.88929	0.00279037	0.286946	0.00133767	0.0597018	0.0244659	0.418823	Gm17296	predicted gene, 17296
MLres	ENSMUSG00000031166	0.506186	0.0578405	0.540644	0.00135417	0.0600933	0.00631273	0.345056	Wdr13	WD repeat domain 13
MLres	ENSMUSG00000093445	0.247893	0.014207	0.388865	0.00138169	0.0602821	0.00361176	0.322742	Lrch4	leucine-rich repeats and calponin homology (CH) domain containing 4
MLres	ENSMUSG00000025352	0.318091	0.33791	0.799221	0.00138364	0.0602864	0.0191391	0.407587	Gdf11	growth differentiation factor 11
MLres	ENSMUSG00000071646	0.442103	0.00402092	0.308939	0.00144076	0.0605461	0.0261791	0.427026	Mta2	metastasis-associated gene family, member 2
MLres	ENSMUSG00000057069	0.72425	0.0577647	0.540644	0.00146147	0.0608923	0.00466815	0.331599	Ero1lb	ERO1-like beta (S. cerevisiae)
MLres	ENSMUSG00000061207	0.432436	0.0329806	0.474692	0.00148051	0.0611279	0.0329525	0.455635	Stk19	serine/threonine kinase 19
MLres	ENSMUSG00000028763	0.505898	0.00519555	0.320173	0.00151344	0.0614124	0.013931	0.381777	Hspg2	perlecan (heparan sulfate proteoglycan 2)
MLres	ENSMUSG00000022463	0.600194	0.021772	0.430013	0.0015655	0.0623665	0.0067702	0.348171	Srebf2	sterol regulatory element binding factor 2
MLres	ENSMUSG00000031295	0.702441	0.00832468	0.348501	0.00156968	0.0623665	0.0138576	0.381774	Phka2	phosphorylase kinase alpha 2
MLres	ENSMUSG00000033985	0.507853	0.00222738	0.276625	0.00157623	0.0624681	0.0150487	0.389542	Tesk2	testis-specific kinase 2
MLres	ENSMUSG00000003528	0.298483	0.0138451	0.387514	0.0015789	0.0624681	0.0109539	0.363797	Slc25a1	solute carrier family 25 (mitochondrial carrier, citrate transporter), member 1
MLres	ENSMUSG00000035504	1.2089	0.0237078	0.438917	0.0016223	0.0628893	0.0127908	0.374658	Reep6	receptor accessory protein 6
MLres	ENSMUSG00000040859	0.201217	0.0111344	0.367606	0.00164271	0.0629306	0.0378523	0.46283	Bsdc1	BSD domain containing 1
MLres	ENSMUSG00000019578	0.189811	0.177588	0.691857	0.00166167	0.0631431	0.0338392	0.457281	Ubxn6	UBX domain protein 6
MLres	ENSMUSG00000051403	0.209969	0.0217247	0.430013	0.00168855	0.0635167	0.0141254	0.383526	Ppp1r37	protein phosphatase 1, regulatory subunit 37
MLres	ENSMUSG00000003190	0.761188	0.00222455	0.276625	0.00171092	0.0639236	0.0395399	0.466229	Bcl2l12	BCL2-like 12 (proline rich)
MLres	ENSMUSG00000021866	0.16017	0.490519	0.870791	0.00172096	0.063978	0.00645026	0.345056	Anxa11	annexin A11
MLres	ENSMUSG00000029165	0.610972	0.00614618	0.329267	0.00173106	0.063978	0.00694577	0.348758	Agbl5	ATP/GTP binding protein-like 5
MLres	ENSMUSG00000005481	0.51121	0.0170385	0.405823	0.00173385	0.0639872	0.0285403	0.43712	Ddx39	DEAD (Asp-Glu-Ala-Asp) box polypeptide 39
MLres	ENSMUSG00000059208	0.245941	0.00672419	0.332793	0.00175533	0.0639872	0.0467545	0.486615	Hnrnpm	heterogeneous nuclear ribonucleoprotein M
MLres	ENSMUSG00000032175	0.622174	0.00319313	0.292544	0.00177016	0.0640097	0.0159851	0.389542	Tyk2	tyrosine kinase 2
MLres	ENSMUSG00000030522	0.561599	0.0107562	0.364942	0.001823	0.0646381	0.00850834	0.35606	Mtmr10	myotubularin related protein 10
MLres	ENSMUSG00000038550	1.13674	0.0100567	0.357755	0.00183568	0.0647327	0.0389144	0.465688	Ciart	circadian associated repressor of transcription
MLres	ENSMUSG00000037896	0.177253	0.438522	0.851141	0.00185253	0.0649976	0.00690436	0.348758	Rcor1	REST corepressor 1
MLres	ENSMUSG00000029920	0.31817	0.0028339	0.288236	0.00186934	0.0650931	0.0180866	0.403937	Smarcad1	SWI/SNF-related, matrix-associated actin-dependent regulator of chromatin, subfamily a, containing DEAD/H box 1
MLres	ENSMUSG00000032113	0.908132	0.0189724	0.417839	0.00187072	0.0650931	0.02777	0.43412	Chek1	checkpoint kinase 1
MLres	ENSMUSG00000036202	0.402312	0.0379798	0.491278	0.00187189	0.0650931	0.0132631	0.378139	Rif1	Rap1 interacting factor 1 homolog (yeast)
MLres	ENSMUSG00000034820	0.249961	0.00771602	0.340333	0.0018782	0.0651197	0.0150601	0.389542	Cpsf7	cleavage and polyadenylation specific factor 7
MLres	ENSMUSG00000044791	0.30473	0.10477	0.609395	0.00197507	0.0664076	0.0243539	0.418447	Setd2	SET domain containing 2
MLres	ENSMUSG00000026471	0.880879	0.137291	0.65146	0.0019891	0.066613	0.0402034	0.46742	Mr1	major histocompatibility complex, class I-related
MLres	ENSMUSG00000017386	0.615902	0.0054235	0.323475	0.00199364	0.066613	0.026368	0.428411	Traf4	TNF receptor associated factor 4
MLres	ENSMUSG00000004567	0.514424	0.0061475	0.329267	0.00201485	0.0668967	0.00752153	0.352572	Mcoln1	mucolipin 1
MLres	ENSMUSG00000028910	0.521448	0.00401571	0.308939	0.00204226	0.0672328	0.0217177	0.413779	Mecr	mitochondrial trans-2-enoyl-CoA reductase
MLres	ENSMUSG00000009585	1.43237	0.00319095	0.292544	0.00214069	0.0680309	0.0126518	0.373078	Apobec3	apolipoprotein B mRNA editing enzyme, catalytic polypeptide 3
MLres	ENSMUSG00000024457	0.49548	0.0172354	0.407	0.00215738	0.0680309	0.0415966	0.472421	Trim26	tripartite motif-containing 26
MLres	ENSMUSG00000040312	0.586226	0.00388976	0.30485	0.00216107	0.0680309	0.0263502	0.428411	Cchcr1	coiled-coil alpha-helical rod protein 1
MLres	ENSMUSG00000031467	0.161974	0.618462	0.913631	0.00217042	0.0680309	0.0436586	0.478201	Agpat5	1-acylglycerol-3-phosphate O-acyltransferase 5 (lysophosphatidic acid acyltransferase, epsilon)
MLres	ENSMUSG00000031375	0.763703	0.00410741	0.310905	0.00222254	0.068718	0.0214118	0.413779	Bgn	biglycan
MLres	ENSMUSG00000033222	0.607525	0.00669619	0.332793	0.00225388	0.0688775	0.0143284	0.385941	Ttf2	transcription termination factor, RNA polymerase II
MLres	ENSMUSG00000000568	0.345564	0.00766029	0.338937	0.00226185	0.0688775	0.0384041	0.464851	Hnrnpd	heterogeneous nuclear ribonucleoprotein D
MLres	ENSMUSG00000036565	0.531421	0.00733213	0.33806	0.00229948	0.0694212	0.0323796	0.454156	Ttyh3	tweety homolog 3 (Drosophila)
MLres	ENSMUSG00000062175	0.825145	0.00565664	0.323851	0.00235635	0.0700149	0.0375993	0.46257	Tgif2	TGFB-induced factor homeobox 2
MLres	ENSMUSG00000019039	0.514401	0.00756713	0.338247	0.00243644	0.0708934	0.0310356	0.449808	Dalrd3	DALR anticodon binding domain containing 3
MLres	ENSMUSG00000048445	0.528965	0.00672879	0.332793	0.00245869	0.0709994	0.0310871	0.449808	Ccdc57	coiled-coil domain containing 57
MLres	ENSMUSG00000025076	0.94396	0.00807438	0.345607	0.00250933	0.0713543	0.0404364	0.46805	Casp7	caspase 7
MLres	ENSMUSG00000026895	0.130565	0.0533767	0.53169	0.00254268	0.0716482	0.00988361	0.357738	Ndufa8	NADH dehydrogenase (ubiquinone) 1 alpha subcomplex, 8
MLres	ENSMUSG00000030888	0.558316	0.0100594	0.357755	0.00254546	0.0716724	0.00859091	0.35606	Rrp8	ribosomal RNA processing 8, methyltransferase, homolog (yeast)
MLres	ENSMUSG00000028456	1.00237	0.00657753	0.331311	0.00260825	0.0725381	0.0318935	0.452534	Unc13b	unc-13 homolog B (C. elegans)
MLres	ENSMUSG00000020122	1.03957	0.0162066	0.401488	0.00264843	0.072756	0.0237541	0.41803	Egfr	epidermal growth factor receptor
MLres	ENSMUSG00000020733	0.97731	0.00652287	0.331155	0.00266233	0.0728203	0.0299198	0.443786	Slc9a3r1	solute carrier family 9 (sodium/hydrogen exchanger), member 3 regulator 1
MLres	ENSMUSG00000002814	0.22927	0.440721	0.851755	0.00267128	0.0728242	0.00921557	0.357379	Top3a	topoisomerase (DNA) III alpha
MLres	ENSMUSG00000026374	0.29695	0.029093	0.461129	0.00270413	0.0731252	0.0390668	0.465688	Tsn	translin
MLres	ENSMUSG00000032115	0.510471	0.00313907	0.292544	0.00271048	0.0732126	0.00929112	0.357379	Hyou1	hypoxia up-regulated 1
MLres	ENSMUSG00000038351	0.575696	0.00867728	0.351939	0.00271228	0.0732192	0.0200557	0.410067	Sgsm2	small G protein signaling modulator 2
MLres	ENSMUSG00000027678	0.579906	0.00450749	0.315828	0.00274178	0.0735803	0.0137578	0.381478	Ncoa3	nuclear receptor coactivator 3
MLres	ENSMUSG00000036931	0.72038	0.012275	0.375164	0.00280483	0.0737884	0.00589201	0.339387	Nfkbid	nuclear factor of kappa light polypeptide gene enhancer in B cells inhibitor, delta
MLres	ENSMUSG00000066800	1.28241	0.0063046	0.329267	0.00283579	0.0739589	0.0362376	0.461121	Rnasel	ribonuclease L (2', 5'-oligoisoadenylate synthetase-dependent)
MLres	ENSMUSG00000028911	0.338339	0.0106838	0.364621	0.00285563	0.0741879	0.0356257	0.459842	Srsf4	serine/arginine-rich splicing factor 4
MLres	ENSMUSG00000046380	0.394495	0.00546424	0.323475	0.00287018	0.0741964	0.0120464	0.370843	Jrk	jerky
MLres	ENSMUSG00000024855	0.436965	0.034344	0.478421	0.00297033	0.0755375	0.00713891	0.350014	Pacs1	phosphofurin acidic cluster sorting protein 1
MLres	ENSMUSG00000024422	0.478092	0.00494065	0.320172	0.00299794	0.0757633	0.0432088	0.476335	Dhx16	DEAH (Asp-Glu-Ala-His) box polypeptide 16
MLres	ENSMUSG00000039205	0.322907	0.0433845	0.507078	0.00301025	0.0758948	0.0275079	0.433691	Ciz1	CDKN1A interacting zinc finger protein 1
MLres	ENSMUSG00000015363	0.371095	0.0206091	0.42811	0.00303541	0.076196	0.0170313	0.397394	Trabd	TraB domain containing
MLres	ENSMUSG00000039738	0.801976	0.00745286	0.338145	0.00305222	0.076297	0.0237636	0.41803	Slx4	SLX4 structure-specific endonuclease subunit homolog (S. cerevisiae)
MLres	ENSMUSG00000022617	0.363775	0.0124281	0.375823	0.00312473	0.0770167	0.015073	0.389542	Chkb	choline kinase beta
MLres	ENSMUSG00000035936	0.695035	0.0334376	0.476401	0.00312483	0.0770167	0.0453474	0.483768	Aldh5a1	aldhehyde dehydrogenase family 5, subfamily A1
MLres	ENSMUSG00000024160	0.222485	0.0975773	0.60052	0.00313286	0.0770297	0.0353784	0.459301	Spsb3	splA/ryanodine receptor domain and SOCS box containing 3
MLres	ENSMUSG00000073609	0.420619	0.0688403	0.556244	0.00314902	0.0772176	0.0420069	0.472779	D2hgdh	D-2-hydroxyglutarate dehydrogenase
MLres	ENSMUSG00000023905	0.423209	0.0240673	0.44145	0.00315154	0.0772176	0.0344881	0.458471	Tnfrsf12a	tumor necrosis factor receptor superfamily, member 12a
MLres	ENSMUSG00000024735	0.37769	0.0184698	0.416457	0.00321289	0.0776246	0.0265713	0.429727	Prpf19	PRP19/PSO4 pre-mRNA processing factor 19 homolog (S. cerevisiae)
MLres	ENSMUSG00000029722	0.381979	0.0170229	0.405823	0.00326528	0.0782281	0.0279815	0.435425	Agfg2	ArfGAP with FG repeats 2
MLres	ENSMUSG00000062190	0.69889	0.0049022	0.320172	0.00326697	0.0782281	0.0414724	0.472325	Lancl2	LanC (bacterial lantibiotic synthetase component C)-like 2
MLres	ENSMUSG00000034297	0.182379	0.105732	0.609871	0.00333914	0.0788907	0.0180959	0.403952	Med13	mediator complex subunit 13
MLres	ENSMUSG00000034653	0.44239	0.0087843	0.351939	0.0034155	0.0795384	0.0336987	0.457281	Ythdc2	YTH domain containing 2
MLres	ENSMUSG00000039354	0.3239	0.0124204	0.375823	0.00342755	0.0795384	0.0360118	0.460799	Smarcal1	SWI/SNF related matrix associated, actin dependent regulator of chromatin, subfamily a-like 1
MLres	ENSMUSG00000038260	0.878089	0.00500797	0.320172	0.00350322	0.0802762	0.0237184	0.41803	Trpm4	transient receptor potential cation channel, subfamily M, member 4
MLres	ENSMUSG00000028703	0.289892	0.00940692	0.355301	0.00351563	0.0803904	0.0150493	0.389542	Lrrc41	leucine rich repeat containing 41
MLres	ENSMUSG00000075700	0.171551	0.386317	0.82625	0.00352395	0.0804239	0.0130494	0.376445	Selt	selenoprotein T
MLres	ENSMUSG00000030678	0.100964	0.475201	0.865313	0.00361564	0.081387	0.042501	0.474641	Maz	MYC-associated zinc finger protein (purine-binding transcription factor)
MLres	ENSMUSG00000029687	0.769248	0.00656845	0.331311	0.00364998	0.0814393	0.0362228	0.461121	Ezh2	enhancer of zeste homolog 2 (Drosophila)
MLres	ENSMUSG00000006494	0.647863	0.0208847	0.428756	0.00366944	0.0816021	0.0212569	0.413463	Pdk1	pyruvate dehydrogenase kinase, isoenzyme 1
MLres	ENSMUSG00000078427	0.258657	0.0170079	0.40571	0.0037181	0.081793	0.0277648	0.43412	Sarnp	SAP domain containing ribonucleoprotein
MLres	ENSMUSG00000059796	0.312711	0.0125917	0.375823	0.00373224	0.0818758	0.0236184	0.418029	Eif4a1	eukaryotic translation initiation factor 4A1
MLres	ENSMUSG00000032312	0.165673	0.123352	0.634117	0.0037602	0.0819752	0.0476816	0.487646	Csk	c-src tyrosine kinase
MLres	ENSMUSG00000050240	0.638251	0.0104951	0.362807	0.00378111	0.0819752	0.0225335	0.416143	Hic2	hypermethylated in cancer 2
MLres	ENSMUSG00000028452	0.167387	0.029369	0.46245	0.00383241	0.082227	0.042867	0.475182	Vcp	valosin containing protein
MLres	ENSMUSG00000075040	1.01075	0.0126311	0.375823	0.00384546	0.0822416	0.0407263	0.468929	Zfp408	zinc finger protein 408
MLres	ENSMUSG00000033991	0.419922	0.00507145	0.320172	0.00385801	0.0823038	0.0407978	0.468929	Ttc37	tetratricopeptide repeat domain 37
MLres	ENSMUSG00000032126	0.510373	0.00669585	0.332793	0.00390427	0.0825806	0.0150623	0.389542	Hmbs	hydroxymethylbilane synthase
MLres	ENSMUSG00000054520	0.778262	0.00843648	0.348853	0.00401537	0.0833733	0.0141858	0.384128	Sh3bp2	SH3-domain binding protein 2
MLres	ENSMUSG00000060438	0.340974	0.142091	0.656294	0.00402265	0.0833733	0.0210031	0.413463	Rps10-ps1	ribosomal protein S10, pseudogene 1
MLres	ENSMUSG00000010051	0.701282	0.246821	0.746779	0.00408427	0.0836647	0.018141	0.404149	Hyal1	hyaluronoglucosaminidase 1
MLres	ENSMUSG00000050912	1.10157	0.00746507	0.338145	0.00411191	0.0838184	0.0341414	0.457281	Tmem123	transmembrane protein 123
MLres	ENSMUSG00000008435	0.868061	0.00916796	0.353162	0.00412278	0.0839149	0.0154388	0.389542	Rdh13	retinol dehydrogenase 13 (all-trans and 9-cis)
MLres	ENSMUSG00000041623	0.710624	0.0529756	0.531624	0.00415111	0.0839646	0.0467597	0.486615	D11Wsu47e	DNA segment, Chr 11, Wayne State University 47, expressed
MLres	ENSMUSG00000022476	0.434659	0.017077	0.406326	0.0041638	0.0839646	0.0102185	0.360899	Polr3h	polymerase (RNA) III (DNA directed) polypeptide H
MLres	ENSMUSG00000050144	0.191316	0.363421	0.813813	0.00417807	0.0839729	0.0266591	0.429753	Slc25a44	solute carrier family 25, member 44
MLres	ENSMUSG00000025326	0.723496	0.0161112	0.401214	0.00420158	0.0840225	0.0244766	0.418823	Ube3a	ubiquitin protein ligase E3A
MLres	ENSMUSG00000030509	0.260035	0.106512	0.611137	0.00427532	0.0845936	0.011209	0.364378	Asb7	ankyrin repeat and SOCS box-containing 7
MLres	ENSMUSG00000060216	0.540407	0.0607527	0.543142	0.00428736	0.0845936	0.0292819	0.439808	Arrb2	arrestin, beta 2
MLres	ENSMUSG00000026933	0.354327	0.027797	0.455918	0.00432724	0.0848547	0.0239049	0.41803	Camsap1	calmodulin regulated spectrin-associated protein 1
MLres	ENSMUSG00000052833	0.192628	0.0608732	0.543142	0.00438786	0.0854014	0.0391825	0.465688	Sae1	SUMO1 activating enzyme subunit 1
MLres	ENSMUSG00000025855	1.73751	0.0139586	0.387834	0.00472807	0.0877655	0.0148665	0.389297	Prkar1b	protein kinase, cAMP dependent regulatory, type I beta
MLres	ENSMUSG00000023830	0.884175	0.0108794	0.366272	0.00473199	0.0877891	0.0332283	0.456142	Igf2r	insulin-like growth factor 2 receptor
MLres	ENSMUSG00000045078	0.251802	0.195738	0.711525	0.00481953	0.0884146	0.020299	0.41057	Rnf216	ring finger protein 216
MLres	ENSMUSG00000028954	0.35388	0.0244421	0.442172	0.00489323	0.0885195	0.0349333	0.458564	Nub1	negative regulator of ubiquitin-like proteins 1
MLres	ENSMUSG00000033276	0.641522	0.0077643	0.341221	0.00497666	0.0891035	0.0435294	0.477897	Stk36	serine/threonine kinase 36
MLres	ENSMUSG00000038604	0.178493	0.256213	0.751757	0.00502817	0.0894397	0.0380892	0.463972	Fam65a	family with sequence similarity 65, member A
MLres	ENSMUSG00000030380	0.710594	0.0130253	0.381217	0.00510336	0.0899989	0.0182272	0.404149	Mzf1	myeloid zinc finger 1
MLres	ENSMUSG00000000253	1.04934	0.052162	0.529126	0.00512134	0.0900491	0.0218109	0.414159	Gmpr	guanosine monophosphate reductase
MLres	ENSMUSG00000025487	0.257186	0.0300909	0.463791	0.00521097	0.0902696	0.0214053	0.413779	Psmd13	proteasome (prosome, macropain) 26S subunit, non-ATPase, 13
MLres	ENSMUSG00000027333	0.466347	0.1902	0.7059	0.00526997	0.0905032	0.0471217	0.486824	Smox	spermine oxidase
MLres	ENSMUSG00000041915	0.31025	0.00722245	0.335342	0.00531871	0.0909275	0.0199111	0.409137	Ammecr1l	AMME chromosomal region gene 1-like
MLres	ENSMUSG00000031103	0.598694	0.0225809	0.434807	0.00536386	0.0913004	0.0497354	0.491964	Elf4	E74-like factor 4 (ets domain transcription factor)
MLres	ENSMUSG00000026127	0.433257	0.0196176	0.42168	0.00537239	0.091363	0.0266415	0.429753	Imp4	IMP4, U3 small nucleolar ribonucleoprotein, homolog (yeast)
MLres	ENSMUSG00000003527	0.350845	0.0088313	0.351939	0.00538937	0.0915023	0.0339864	0.457281	Dgcr14	DiGeorge syndrome critical region gene 14
MLres	ENSMUSG00000012114	0.166623	0.0133925	0.384368	0.00550546	0.0921059	0.013469	0.380504	Med15	mediator complex subunit 15
MLres	ENSMUSG00000039741	0.424665	0.0122078	0.375164	0.00557754	0.0924242	0.0470918	0.48673	Bahcc1	BAH domain and coiled-coil containing 1
MLres	ENSMUSG00000031060	0.244062	0.0147982	0.394494	0.00560746	0.092789	0.0368428	0.46257	Rbm10	RNA binding motif protein 10
MLres	ENSMUSG00000019777	0.155197	0.437404	0.850593	0.00573953	0.0930716	0.0207462	0.413326	Hdac2	histone deacetylase 2
MLres	ENSMUSG00000056366	2.08375	0.00967725	0.356671	0.00575189	0.0932399	0.0345618	0.458471	Fabp3-ps1	fatty acid binding protein 3, muscle and heart, pseudogene 1
MLres	ENSMUSG00000030516	0.438979	0.0581071	0.540697	0.00593908	0.0945183	0.0201934	0.41016	Tjp1	tight junction protein 1
MLres	ENSMUSG00000037151	0.789779	0.0145633	0.392735	0.0059425	0.0945183	0.0170402	0.397394	Lrrc20	leucine rich repeat containing 20
MLres	ENSMUSG00000039623	0.203139	0.177494	0.691804	0.00600262	0.0948159	0.0282466	0.435601	Ap5z1	adaptor-related protein complex 5, zeta 1 subunit
MLres	ENSMUSG00000030513	1.54453	0.0211738	0.429746	0.00612314	0.0955116	0.0202535	0.410536	Pcsk6	proprotein convertase subtilisin/kexin type 6
MLres	ENSMUSG00000039774	0.846835	0.0358823	0.483332	0.00629327	0.0965774	0.0348419	0.458564	Galnt12	UDP-N-acetyl-alpha-D-galactosamine:polypeptide N-acetylgalactosaminyltransferase 12
MLres	ENSMUSG00000047037	0.515834	0.080152	0.572706	0.00642421	0.0971475	0.0339383	0.457281	Nipa1	non imprinted in Prader-Willi/Angelman syndrome 1 homolog (human)
MLres	ENSMUSG00000024622	0.32354	0.0544045	0.533198	0.00644408	0.0971475	0.0159743	0.389542	Hmgxb3	HMG box domain containing 3
MLres	ENSMUSG00000055485	0.13446	0.613903	0.912833	0.0064931	0.0976045	0.0363086	0.461121	Soga1	suppressor of glucose, autophagy associated 1
MLres	ENSMUSG00000004929	0.14256	0.440946	0.851755	0.00652723	0.0979294	0.0443686	0.481098	Thop1	thimet oligopeptidase 1
MLres	ENSMUSG00000035671	0.652172	0.368819	0.816517	0.00655941	0.0980292	0.0382999	0.464837	Zswim4	zinc finger SWIM-type containing 4
MLres	ENSMUSG00000010290	0.287701	0.0992949	0.603033	0.00661777	0.098321	0.0362941	0.461121	AI597479	expressed sequence AI597479
MLres	ENSMUSG00000021179	0.414274	0.0189772	0.417839	0.00662914	0.0983439	0.0397956	0.466771	Nrde2	nrde-2 necessary for RNA interference, domain containing
MLres	ENSMUSG00000038658	0.281212	0.0385581	0.492146	0.00666567	0.0984955	0.0340723	0.457281	Ric1	RAB6A GEF complex partner 1
MLres	ENSMUSG00000046572	0.780889	0.0292945	0.462418	0.00673868	0.0988585	0.0172245	0.397961	Zfp518b	zinc finger protein 518B
MLres	ENSMUSG00000024260	0.356202	0.0481396	0.521739	0.00679303	0.0991293	0.0446226	0.481779	Sap130	Sin3A associated protein
MLres	ENSMUSG00000029821	0.939249	0.0565939	0.538728	0.00698415	0.0999471	0.0159407	0.389542	Dfna5	deafness, autosomal dominant 5 (human)
MLres	ENSMUSG00000041235	0.959624	0.0473322	0.520679	0.0070169	0.100061	0.0221411	0.41455	Chd7	chromodomain helicase DNA binding protein 7
MLres	ENSMUSG00000032120	0.520076	0.0123056	0.375164	0.00713194	0.100517	0.0213501	0.413779	C2cd2l	C2 calcium-dependent domain containing 2-like
MLres	ENSMUSG00000017132	0.137896	0.673987	0.928375	0.00714309	0.100549	0.0308244	0.449082	Cyth1	cytohesin 1
MLres	ENSMUSG00000039116	1.90816	0.018441	0.416457	0.00725353	0.101238	0.0215058	0.413779	Adgrg6	adhesion G protein-coupled receptor G6
MLres	ENSMUSG00000074102	0.255405	0.0159773	0.400677	0.00733774	0.101584	0.0291619	0.439644	Rbm15b	RNA binding motif protein 15B
MLres	ENSMUSG00000031715	0.219329	0.0142204	0.388865	0.00734296	0.101625	0.0227904	0.41667	Smarca5	SWI/SNF related, matrix associated, actin dependent regulator of chromatin, subfamily a, member 5
MLres	ENSMUSG00000028655	1.18782	0.011558	0.368429	0.00745924	0.102212	0.0196009	0.409137	Mfsd2a	major facilitator superfamily domain containing 2A
MLres	ENSMUSG00000022702	0.290545	0.0496259	0.525281	0.00748345	0.102368	0.0372015	0.46257	Hira	histone cell cycle regulation defective homolog A (S. cerevisiae)
MLres	ENSMUSG00000039637	0.409995	0.0418468	0.502519	0.00754088	0.10264	0.0293904	0.440809	Coro7	coronin 7
MLres	ENSMUSG00000006215	0.372074	0.0125591	0.375823	0.00755017	0.10264	0.0423683	0.474533	Zbtb17	zinc finger and BTB domain containing 17
MLres	ENSMUSG00000038888	0.860067	0.0171734	0.406969	0.00760071	0.102754	0.0333461	0.456863	Ctu1	cytosolic thiouridylase subunit 1 homolog (S. pombe)
MLres	ENSMUSG00000024764	0.452874	0.0311869	0.466737	0.00772475	0.103037	0.032749	0.454718	Naa40	N(alpha)-acetyltransferase 40, NatD catalytic subunit, homolog (S. cerevisiae)
MLres	ENSMUSG00000021133	0.526501	0.0768326	0.568538	0.00772701	0.103037	0.03669	0.46257	Susd6	sushi domain containing 6
MLres	ENSMUSG00000036819	0.943678	0.0315288	0.469173	0.00788804	0.103677	0.0348573	0.458564	Jmjd4	jumonji domain containing 4
MLres	ENSMUSG00000029089	0.407452	0.0543667	0.533198	0.00795871	0.103784	0.0473062	0.486953	Pacrgl	PARK2 co-regulated-like
MLres	ENSMUSG00000063317	0.562009	0.100066	0.603806	0.00798904	0.103828	0.0476636	0.487646	Usp31	ubiquitin specific peptidase 31
MLres	ENSMUSG00000038305	1.47823	0.018163	0.414218	0.00807358	0.104153	0.0379392	0.462985	Spats2l	spermatogenesis associated, serine-rich 2-like
MLres	ENSMUSG00000015126	0.393874	0.0540986	0.533198	0.00815451	0.104481	0.0497488	0.491983	Tsr3	TSR3 20S rRNA accumulation
MLres	ENSMUSG00000019947	0.362549	0.0189967	0.417839	0.00821505	0.104741	0.0448347	0.482666	Arid5b	AT rich interactive domain 5B (MRF1-like)
MLres	ENSMUSG00000027327	0.417377	0.0576551	0.540644	0.00822155	0.104753	0.0296719	0.442346	1700037H04Rik	RIKEN cDNA 1700037H04 gene
MLres	ENSMUSG00000087687	0.364604	0.0153935	0.398417	0.00822498	0.104753	0.0368292	0.46257	Pet100	PET100 homolog (S. cerevisiae)
MLres	ENSMUSG00000031090	0.683022	0.0301054	0.463791	0.00823305	0.104753	0.0245005	0.418855	Nadsyn1	NAD synthetase 1
MLres	ENSMUSG00000029538	0.456377	0.031166	0.466737	0.00834437	0.104936	0.0352608	0.458664	Srsf9	serine/arginine-rich splicing factor 9
MLres	ENSMUSG00000025403	0.532476	0.0214779	0.429987	0.00840449	0.105129	0.0428671	0.475182	Shmt2	serine hydroxymethyltransferase 2 (mitochondrial)
MLres	ENSMUSG00000046691	0.210143	0.0259071	0.448756	0.00842571	0.105266	0.0245564	0.419352	Chtf8	CTF8, chromosome transmission fidelity factor 8
MLres	ENSMUSG00000031453	0.225952	0.343804	0.8028	0.00845348	0.10537	0.0443998	0.481098	Rasa3	RAS p21 protein activator 3
MLres	ENSMUSG00000026519	0.449396	0.0813399	0.575194	0.00848624	0.105406	0.0195082	0.409053	Tmem63a	transmembrane protein 63a
MLres	ENSMUSG00000071650	0.346942	0.030091	0.463791	0.00860039	0.105907	0.0237183	0.41803	Ganab	alpha glucosidase 2 alpha neutral subunit
MLres	ENSMUSG00000067825	0.668099	0.0212134	0.429869	0.00861936	0.105933	0.01745	0.398438	Pex26	peroxisomal biogenesis factor 26
MLres	ENSMUSG00000022969	0.818633	0.0263908	0.448756	0.00867276	0.105975	0.0275188	0.433691	Il10rb	interleukin 10 receptor, beta
MLres	ENSMUSG00000032826	0.586742	0.0195034	0.420403	0.00871817	0.105975	0.0275393	0.433691	Ank2	ankyrin 2, brain
MLres	ENSMUSG00000021476	0.447473	0.0190333	0.418313	0.00874626	0.106105	0.0239756	0.41803	Habp4	hyaluronic acid binding protein 4
MLres	ENSMUSG00000056917	0.424581	0.0163649	0.402181	0.00874874	0.106105	0.0426653	0.474641	Sipa1	signal-induced proliferation associated gene 1
MLres	ENSMUSG00000049287	0.679853	0.0232252	0.437129	0.00876413	0.106138	0.0195704	0.409053	Iba57	IBA57, iron-sulfur cluster assembly homolog (S. cerevisiae)
MLres	ENSMUSG00000030720	0.1717	0.480785	0.866872	0.00962122	0.109469	0.0353881	0.459301	Cln3	ceroid lipofuscinosis, neuronal 3, juvenile (Batten, Spielmeyer-Vogt disease)
MLres	ENSMUSG00000059791	1.10485	0.0189961	0.417839	0.00970974	0.109919	0.0339342	0.457281	Nrm	nurim (nuclear envelope membrane protein)
MLres	ENSMUSG00000029557	0.538334	0.0810231	0.57459	0.00971695	0.109919	0.0226129	0.416176	Ftsj2	FtsJ homolog 2 (E. coli)
MLres	ENSMUSG00000056673	0.506615	0.0339923	0.477806	0.00982035	0.110423	0.0322527	0.453461	Kdm5d	lysine (K)-specific demethylase 5D
MLres	ENSMUSG00000066705	1.54989	0.0134048	0.384368	0.00994546	0.110874	0.0361058	0.460908	Fxyd6	FXYD domain-containing ion transport regulator 6
MLres	ENSMUSG00000029634	-1.17653	2.5168e-05	0.0984592	4.41634e-06	0.0159481	0.000207052	0.231034	Rnf6	ring finger protein (C3H2C3 type) 6
MLres	ENSMUSG00000042182	-1.13264	0.00151037	0.255972	1.67987e-05	0.0246442	0.000266216	0.231034	Bend6	BEN domain containing 6
MLres	ENSMUSG00000006527	-0.668938	4.76277e-05	0.12157	1.9979e-05	0.0253491	0.0004383	0.231034	Sfmbt1	Scm-like with four mbt domains 1
MLres	ENSMUSG00000061451	-1.86557	0.0113396	0.367606	3.31135e-05	0.0283573	0.0053777	0.3346	Tmem151a	transmembrane protein 151A
MLres	ENSMUSG00000046909	-0.664296	0.00563933	0.323851	4.32225e-05	0.0294069	0.000737693	0.247943	Tefm	transcription elongation factor, mitochondrial
MLres	ENSMUSG00000038145	-0.775479	0.000830597	0.217608	5.68001e-05	0.0317868	0.001014	0.257482	Snrk	SNF related kinase
MLres	ENSMUSG00000031812	-0.617282	0.00187718	0.27182	6.07006e-05	0.0317868	0.00373767	0.322742	Map1lc3b	microtubule-associated protein 1 light chain 3 beta
MLres	ENSMUSG00000001918	-1.30667	0.000134587	0.146935	6.83717e-05	0.0322944	0.00178145	0.290382	Slc1a5	solute carrier family 1 (neutral amino acid transporter), member 5
MLres	ENSMUSG00000063253	-0.465492	0.00364998	0.299108	6.86236e-05	0.0322944	0.000809644	0.254225	Scoc	short coiled-coil protein
MLres	ENSMUSG00000031446	-0.425705	0.000511336	0.194582	8.30108e-05	0.0324455	0.0021319	0.302102	Cul4a	cullin 4A
MLres	ENSMUSG00000050335	-1.94571	0.000436508	0.188773	0.000109705	0.0339017	0.00506586	0.331683	Lgals3	lectin, galactose binding, soluble 3
MLres	ENSMUSG00000005846	-0.262869	0.006877	0.335342	0.00012282	0.0341287	0.00111455	0.257482	Rsl1d1	ribosomal L1 domain containing 1
MLres	ENSMUSG00000078923	-0.222948	0.0423586	0.504618	0.000125796	0.0341287	0.000654607	0.238146	Ube2v1	ubiquitin-conjugating enzyme E2 variant 1
MLres	ENSMUSG00000066568	-0.332957	0.000250288	0.172581	0.000128027	0.0341287	0.00235425	0.303324	Lsm14a	LSM14 homolog A (SCD6, S. cerevisiae)
MLres	ENSMUSG00000033933	-0.530031	0.000660738	0.209829	0.000140332	0.0342316	0.0013696	0.272256	Vhl	von Hippel-Lindau tumor suppressor
MLres	ENSMUSG00000022559	-0.154773	0.387879	0.826951	0.000148968	0.0344497	0.000794942	0.254225	Fbxl6	F-box and leucine-rich repeat protein 6
MLres	ENSMUSG00000050373	-0.493714	0.000492533	0.194259	0.000156615	0.0350996	0.0080482	0.354488	Snx21	sorting nexin family member 21
MLres	ENSMUSG00000061410	-0.467207	0.00373994	0.300352	0.000162637	0.0350996	0.00387941	0.322742	Zcchc14	zinc finger, CCHC domain containing 14
MLres	ENSMUSG00000032913	-0.68632	0.000841975	0.217608	0.000162993	0.0350996	0.00432365	0.327578	Lrig2	leucine-rich repeats and immunoglobulin-like domains 2
MLres	ENSMUSG00000047843	-0.593914	0.000528123	0.194582	0.000177866	0.0365585	0.00476102	0.331599	Bri3	brain protein I3
MLres	ENSMUSG00000027782	-0.532095	0.0003274	0.180154	0.000184422	0.0368413	0.00521921	0.333059	Kpna4	karyopherin (importin) alpha 4
MLres	ENSMUSG00000021770	-0.507892	0.00455068	0.316162	0.000188931	0.0369805	0.00776067	0.352572	Samd8	sterile alpha motif domain containing 8
MLres	ENSMUSG00000068742	-0.560832	0.0359995	0.483332	0.000201983	0.0369805	0.0010402	0.257482	Cry2	cryptochrome 2 (photolyase-like)
MLres	ENSMUSG00000074971	-1.63492	0.000779125	0.215408	0.000214768	0.0370673	0.0044576	0.330719	Fibin	fin bud initiation factor homolog (zebrafish)
MLres	ENSMUSG00000020265	-0.474732	0.00125694	0.239306	0.000217354	0.0370949	0.00638617	0.345056	Sumo3	small ubiquitin-like modifier 3
MLres	ENSMUSG00000018012	-1.55985	0.0034045	0.295971	0.000225039	0.0377301	0.00476023	0.331599	Rac3	RAS-related C3 botulinum substrate 3
MLres	ENSMUSG00000031740	-0.884483	0.000472912	0.191387	0.000235468	0.0382654	0.000868311	0.254225	Mmp2	matrix metallopeptidase 2
MLres	ENSMUSG00000006392	-0.363579	0.00263145	0.286941	0.000265417	0.03919	0.000894593	0.254225	Med8	mediator complex subunit 8
MLres	ENSMUSG00000052419	-0.479937	0.00468381	0.317289	0.000271454	0.03919	0.00423455	0.326422	2610001J05Rik	RIKEN cDNA 2610001J05 gene
MLres	ENSMUSG00000021453	-1.3181	0.00121197	0.237099	0.000276382	0.0393174	0.0106485	0.363549	Gadd45g	growth arrest and DNA-damage-inducible 45 gamma
MLres	ENSMUSG00000030254	-0.808026	0.00995988	0.356925	0.000304472	0.040401	0.00408225	0.322742	Rad18	RAD18 E3 ubiquitin protein ligase
MLres	ENSMUSG00000036545	-1.47497	0.000596479	0.205262	0.000308446	0.0407759	0.00424568	0.326448	Adamts2	a disintegrin-like and metallopeptidase (reprolysin type) with thrombospondin type 1 motif, 2
MLres	ENSMUSG00000019558	-0.493079	0.00354459	0.298946	0.000316248	0.0411482	0.0124212	0.372856	Slc6a8	solute carrier family 6 (neurotransmitter transporter, creatine), member 8
MLres	ENSMUSG00000026064	-0.299617	0.00524111	0.320173	0.000374328	0.0436051	0.00315245	0.314657	Ptp4a1	protein tyrosine phosphatase 4a1
MLres	ENSMUSG00000059363	-0.488251	0.0132255	0.383678	0.000406986	0.0436404	0.00401382	0.322742	Fxn	frataxin
MLres	ENSMUSG00000067377	-0.705306	0.00110411	0.232885	0.00042507	0.0442707	0.00442017	0.330413	Tspan6	tetraspanin 6
MLres	ENSMUSG00000000282	-0.411376	0.00206291	0.272301	0.000428747	0.0444316	0.0161288	0.39009	Mnt	max binding protein
MLres	ENSMUSG00000028683	-0.383094	0.00213252	0.275581	0.000431693	0.0446384	0.00786489	0.353403	Eif2b3	eukaryotic translation initiation factor 2B, subunit 3
MLres	ENSMUSG00000017756	-1.01578	0.0209868	0.428775	0.000441683	0.044881	0.00334369	0.318607	Slc12a7	solute carrier family 12, member 7
MLres	ENSMUSG00000051391	-0.490571	0.000988059	0.227375	0.000485694	0.046336	0.00742498	0.351655	Ywhag	tyrosine 3-monooxygenase/tryptophan 5-monooxygenase activation protein, gamma polypeptide
MLres	ENSMUSG00000074622	-1.31659	0.000963207	0.227225	0.000497753	0.046336	0.0044984	0.331518	Mafb	v-maf musculoaponeurotic fibrosarcoma oncogene family, protein B (avian)
MLres	ENSMUSG00000052681	-0.434805	0.00394617	0.30671	0.000537074	0.0478424	0.0154001	0.389542	Rap1b	RAS related protein 1b
MLres	ENSMUSG00000018322	-0.815196	0.000795048	0.215408	0.000546451	0.0481395	0.00813174	0.355751	Tomm34	translocase of outer mitochondrial membrane 34
MLres	ENSMUSG00000052748	-0.555517	0.0502538	0.525562	0.000571934	0.0484647	0.0236563	0.41803	Swt1	SWT1 RNA endoribonuclease homolog (S. cerevisiae)
MLres	ENSMUSG00000040124	-0.438928	0.00378031	0.301301	0.000581834	0.0487753	0.0171679	0.397961	Gorab	golgin, RAB6-interacting
MLres	ENSMUSG00000007812	-0.322028	0.160565	0.674453	0.000585547	0.0489119	0.0306153	0.447428	Zfp655	zinc finger protein 655
MLres	ENSMUSG00000058594	-0.649527	0.00120589	0.237099	0.000611363	0.0497408	0.0103594	0.361656	Fbxo18	F-box protein 18
MLres	ENSMUSG00000020264	-1.34439	0.00195978	0.27182	0.000641015	0.0505756	0.00972181	0.357379	Slc36a2	solute carrier family 36 (proton/amino acid symporter), member 2
MLres	ENSMUSG00000006299	-0.1923	0.127247	0.638751	0.000675894	0.0509714	0.0184985	0.405862	Aamp	angio-associated migratory protein
MLres	ENSMUSG00000002396	-0.818524	0.00120775	0.237099	0.000688236	0.0509714	0.00388291	0.322742	Ocel1	occludin/ELL domain containing 1
MLres	ENSMUSG00000028476	-0.785453	0.00874617	0.351939	0.000749831	0.0525385	0.027134	0.431738	Reck	reversion-inducing-cysteine-rich protein with kazal motifs
MLres	ENSMUSG00000030095	-0.626636	0.00979555	0.356925	0.000771882	0.0529341	0.0247957	0.419542	Tmem43	transmembrane protein 43
MLres	ENSMUSG00000020076	-0.180082	0.202962	0.716662	0.000775978	0.0529481	0.00475081	0.331599	Ddx50	DEAD (Asp-Glu-Ala-Asp) box polypeptide 50
MLres	ENSMUSG00000040044	-0.393013	0.00431508	0.311387	0.000788764	0.0530227	0.00203984	0.302102	Orc3	origin recognition complex, subunit 3
MLres	ENSMUSG00000028161	-0.52026	0.00836203	0.348501	0.000818807	0.0534638	0.0158186	0.389542	Ppp3ca	protein phosphatase 3, catalytic subunit, alpha isoform
MLres	ENSMUSG00000027573	-0.3962	0.00253793	0.286941	0.000840274	0.054042	0.00688879	0.348758	Gid8	GID complex subunit 8 homolog (S. cerevisiae)
MLres	ENSMUSG00000021379	-0.986944	0.0178167	0.41182	0.000842944	0.054042	0.00813882	0.355751	Id4	inhibitor of DNA binding 4
MLres	ENSMUSG00000040997	-0.612531	0.00742781	0.338145	0.000844964	0.054042	0.0122876	0.371435	Abhd4	abhydrolase domain containing 4
MLres	ENSMUSG00000026603	-0.836148	0.00195722	0.27182	0.000846359	0.0540576	0.0168035	0.395245	Smyd2	SET and MYND domain containing 2
MLres	ENSMUSG00000068917	-0.384805	0.00253232	0.286941	0.000855522	0.0542004	0.00656578	0.345581	Clk2	CDC-like kinase 2
MLres	ENSMUSG00000021482	-0.555913	0.0242259	0.44145	0.000952104	0.0556314	0.0126224	0.372856	Aaed1	AhpC/TSA antioxidant enzyme domain containing 1
MLres	ENSMUSG00000035078	-0.833901	0.00225108	0.276641	0.000977522	0.0560315	0.0108279	0.363797	Mtmr9	myotubularin related protein 9
MLres	ENSMUSG00000020029	-0.798374	0.0100996	0.358257	0.000987498	0.0562393	0.00600784	0.341038	Nudt4	nudix (nucleoside diphosphate linked moiety X)-type motif 4
MLres	ENSMUSG00000001017	-0.156386	0.0419792	0.503461	0.0010225	0.0567621	0.00437063	0.328813	Chtop	chromatin target of PRMT1
MLres	ENSMUSG00000024050	-0.206742	0.00569219	0.323851	0.0010316	0.0568089	0.00619177	0.345056	Wiz	widely-interspaced zinc finger motifs
MLres	ENSMUSG00000028420	-0.529058	0.164589	0.678336	0.00103465	0.0568089	0.0199531	0.409137	Tmem38b	transmembrane protein 38B
MLres	ENSMUSG00000023932	-0.445584	0.00316101	0.292544	0.00105813	0.0568847	0.0242259	0.418426	Cdc5l	cell division cycle 5-like (S. pombe)
MLres	ENSMUSG00000027665	-0.657908	0.0018859	0.27182	0.0010966	0.0573913	0.0108252	0.363797	Pik3ca	phosphatidylinositol 3-kinase, catalytic, alpha polypeptide
MLres	ENSMUSG00000030965	-0.262484	0.0214086	0.429987	0.00111202	0.0576434	0.0158624	0.389542	Fam175b	family with sequence similarity 175, member B
MLres	ENSMUSG00000005823	-2.6923	0.00181119	0.271649	0.00111358	0.0576434	0.0347389	0.458564	Gpr108	G protein-coupled receptor 108
MLres	ENSMUSG00000032388	-0.49492	0.00664592	0.33226	0.00111563	0.0576434	0.00991543	0.358157	Spg21	spastic paraplegia 21 homolog (human)
MLres	ENSMUSG00000029782	-0.608766	0.00215762	0.275581	0.00111894	0.0576434	0.0147021	0.388908	Tmem209	transmembrane protein 209
MLres	ENSMUSG00000029780	-0.494309	0.00328731	0.295166	0.00113049	0.0577485	0.00542099	0.334714	Nt5c3	5'-nucleotidase, cytosolic III
MLres	ENSMUSG00000023980	-0.45197	0.00746016	0.338145	0.00115921	0.058344	0.0266981	0.429816	Taf8	TAF8 RNA polymerase II, TATA box binding protein (TBP)-associated factorq
MLres	ENSMUSG00000018425	-0.302924	0.00778602	0.341221	0.00118371	0.0583843	0.0330724	0.456142	Dhx40	DEAH (Asp-Glu-Ala-His) box polypeptide 40
MLres	ENSMUSG00000052102	-0.636338	0.00592609	0.328585	0.00118807	0.0584632	0.0111853	0.364222	Gnpda1	glucosamine-6-phosphate deaminase 1
MLres	ENSMUSG00000002147	-0.385816	0.0192307	0.419382	0.00119127	0.0585295	0.0381002	0.463972	Stat6	signal transducer and activator of transcription 6
MLres	ENSMUSG00000006463	-0.666704	0.0245143	0.442744	0.00120055	0.0585295	0.00971379	0.357379	Zdhhc24	zinc finger, DHHC domain containing 24
MLres	ENSMUSG00000017686	-0.256999	0.00367248	0.299108	0.00120105	0.0585295	0.0158514	0.389542	Rhot1	ras homolog gene family, member T1
MLres	ENSMUSG00000019877	-0.270607	0.00492708	0.320172	0.00121069	0.0585295	0.0170861	0.397673	Serinc1	serine incorporator 1
MLres	ENSMUSG00000041120	-0.859686	0.0136646	0.385478	0.00121334	0.0585295	0.0133477	0.37886	Nbl1	neuroblastoma, suppression of tumorigenicity 1
MLres	ENSMUSG00000042763	-1.41739	0.00727431	0.336446	0.00126588	0.0589938	0.046801	0.486615	Maneal	mannosidase, endo-alpha-like
MLres	ENSMUSG00000032615	-1.75821	0.00446407	0.314664	0.00130321	0.0590859	0.0204791	0.411721	Nt5m	5',3'-nucleotidase, mitochondrial
MLres	ENSMUSG00000036580	-0.48285	0.00230554	0.277522	0.00130393	0.0590859	0.0073579	0.350865	Spg20	spastic paraplegia 20, spartin (Troyer syndrome) homolog (human)
MLres	ENSMUSG00000061455	-0.701343	0.00894552	0.351939	0.00130834	0.0591417	0.0188268	0.407292	Stx17	syntaxin 17
MLres	ENSMUSG00000027286	-0.444198	0.0237905	0.439703	0.0013658	0.0600933	0.014285	0.385407	Lrrc57	leucine rich repeat containing 57
MLres	ENSMUSG00000031921	-0.353513	0.00359352	0.298946	0.00137471	0.0601482	0.0494204	0.491964	Terf2	telomeric repeat binding factor 2
MLres	ENSMUSG00000031431	-0.998326	0.00241022	0.284291	0.00137825	0.0602145	0.0110739	0.363797	Tsc22d3	TSC22 domain family, member 3
MLres	ENSMUSG00000020778	-1.04637	0.0211354	0.429498	0.00142472	0.0603588	0.00506459	0.331683	Ten1	TEN1 telomerase capping complex subunit
MLres	ENSMUSG00000027479	-0.269958	0.0141674	0.388609	0.00146183	0.0608923	0.00593951	0.340037	Mapre1	microtubule-associated protein, RP/EB family, member 1
MLres	ENSMUSG00000034220	-0.891166	0.0160993	0.401214	0.00146445	0.0609472	0.0473313	0.486953	Gpc1	glypican 1
MLres	ENSMUSG00000000600	-0.426321	0.00497351	0.320172	0.00146657	0.0609549	0.0243711	0.418472	Krit1	KRIT1, ankyrin repeat containing
MLres	ENSMUSG00000028423	-0.415069	0.00580942	0.32602	0.00146983	0.0609549	0.010682	0.363549	Nfx1	nuclear transcription factor, X-box binding 1
MLres	ENSMUSG00000006281	-0.783935	0.00617354	0.329267	0.00150802	0.0614124	0.00776864	0.352572	Tep1	telomerase associated protein 1
MLres	ENSMUSG00000019143	-0.361933	0.006283	0.329267	0.00156644	0.0623665	0.0227263	0.416589	Hars2	histidyl-tRNA synthetase 2, mitochondrial (putative)
MLres	ENSMUSG00000061461	-0.494946	0.0122363	0.375164	0.00158017	0.0624681	0.0186527	0.406146	Smim20	small integral membrane protein 20
MLres	ENSMUSG00000054604	-0.414856	0.00627959	0.329267	0.00158071	0.0624681	0.0154463	0.389542	Cggbp1	CGG triplet repeat binding protein 1
MLres	ENSMUSG00000017843	-0.575304	0.00207624	0.273023	0.00158349	0.0624888	0.0163044	0.391915	Ppp2r5c	protein phosphatase 2, regulatory subunit B', gamma
MLres	ENSMUSG00000039615	-0.112826	0.175046	0.689073	0.00160954	0.0627099	0.0321928	0.453461	Stub1	STIP1 homology and U-Box containing protein 1
MLres	ENSMUSG00000036432	-0.61418	0.00236582	0.281318	0.00162884	0.0629306	0.0318334	0.452443	Siah2	seven in absentia 2
MLres	ENSMUSG00000021760	-0.227648	0.0473852	0.520679	0.00163204	0.0629306	0.0068194	0.348758	Gpx8	glutathione peroxidase 8 (putative)
MLres	ENSMUSG00000044864	-1.01484	0.00318263	0.292544	0.00171162	0.0639236	0.0137162	0.381009	Ankrd50	ankyrin repeat domain 50
MLres	ENSMUSG00000015759	-0.330653	0.142972	0.65712	0.00171595	0.063978	0.0083605	0.35606	Cnih1	cornichon homolog 1 (Drosophila)
MLres	ENSMUSG00000000374	-0.620653	0.00303822	0.292544	0.00175124	0.0639872	0.0241092	0.418257	Trappc10	trafficking protein particle complex 10
MLres	ENSMUSG00000066151	-0.286105	0.00714397	0.335342	0.00177347	0.0640097	0.0334605	0.456863	Fkbp15	FK506 binding protein 15
MLres	ENSMUSG00000025742	-0.440946	0.234237	0.738072	0.00187778	0.0651197	0.0231202	0.417729	Prps2	phosphoribosyl pyrophosphate synthetase 2
MLres	ENSMUSG00000062604	-0.292169	0.0132812	0.383678	0.00189369	0.0653278	0.00802726	0.354173	Srpk2	serine/arginine-rich protein specific kinase 2
MLres	ENSMUSG00000015016	-0.358342	0.0052788	0.321418	0.00199572	0.0666206	0.0139802	0.381777	Acsf3	acyl-CoA synthetase family member 3
MLres	ENSMUSG00000036023	-0.430172	0.0225466	0.434324	0.00201317	0.0668967	0.0188	0.407275	Parp2	poly (ADP-ribose) polymerase family, member 2
MLres	ENSMUSG00000020390	-0.232473	0.0160919	0.401214	0.00205429	0.0673926	0.00718955	0.350846	Ube2b	ubiquitin-conjugating enzyme E2B
MLres	ENSMUSG00000018736	-0.390173	0.013386	0.384368	0.00206173	0.0674951	0.0136974	0.381009	Ndel1	nuclear distribution gene E-like homolog 1 (A. nidulans)
MLres	ENSMUSG00000047213	-0.287336	0.0538666	0.532709	0.00206481	0.0674995	0.0131065	0.3771	Ythdf3	YTH domain family 3
MLres	ENSMUSG00000034473	-0.513262	0.0320025	0.471503	0.00208661	0.0676561	0.0327478	0.454718	Sec22a	SEC22 vesicle trafficking protein homolog A (S. cerevisiae)
MLres	ENSMUSG00000022680	-0.343952	0.0547663	0.534445	0.00209677	0.0676998	0.0139493	0.381777	Pdxdc1	pyridoxal-dependent decarboxylase domain containing 1
MLres	ENSMUSG00000020610	-0.722558	0.0425868	0.504756	0.00211318	0.0678033	0.0310071	0.449685	Amz2	archaelysin family metallopeptidase 2
MLres	ENSMUSG00000046985	-0.320213	0.0670517	0.552127	0.00215041	0.0680309	0.046967	0.486615	Tapt1	transmembrane anterior posterior transformation 1
MLres	ENSMUSG00000023353	-0.413174	0.0131789	0.383323	0.00215372	0.0680309	0.0287477	0.437135	Agap3	ArfGAP with GTPase domain, ankyrin repeat and PH domain 3
MLres	ENSMUSG00000022100	-0.253178	0.00697235	0.335342	0.00217351	0.0680309	0.0252712	0.421585	Xpo7	exportin 7
MLres	ENSMUSG00000090262	-0.793408	0.00600801	0.329109	0.0022361	0.0688189	0.020672	0.413326
MLres	ENSMUSG00000024346	-0.132273	0.410231	0.837695	0.00224157	0.0688496	0.00640596	0.345056	Pfdn1	prefoldin 1
MLres	ENSMUSG00000101904	-0.994502	0.00684016	0.334143	0.00225588	0.0688775	0.0275918	0.433971	Gm29427	predicted gene 29427
MLres	ENSMUSG00000021585	-0.470406	0.0151866	0.397758	0.00234943	0.0699287	0.0462966	0.486615	Cast	calpastatin
MLres	ENSMUSG00000027706	-0.359616	0.00890017	0.351939	0.00237407	0.0701831	0.0182708	0.404149	Sec62	SEC62 homolog (S. cerevisiae)
MLres	ENSMUSG00000030314	-0.478841	0.00659571	0.331516	0.00247882	0.0709994	0.0201371	0.41016	Atg7	autophagy related 7
MLres	ENSMUSG00000022817	-0.576545	0.0107767	0.365016	0.00252667	0.0713914	0.0185517	0.405862	Itgb5	integrin beta 5
MLres	ENSMUSG00000017707	-0.73271	0.0121055	0.375164	0.00256402	0.0718721	0.0165295	0.393497	Serinc3	serine incorporator 3
MLres	ENSMUSG00000040242	-0.7926	0.00335485	0.295166	0.00259203	0.0722153	0.0301955	0.445071	Fgfr1op2	FGFR1 oncogene partner 2
MLres	ENSMUSG00000028597	-0.956177	0.019839	0.422954	0.00261365	0.0725565	0.0220453	0.41455	Gpx7	glutathione peroxidase 7
MLres	ENSMUSG00000056770	-0.406973	0.0121059	0.375164	0.00266576	0.0728203	0.0338923	0.457281	Setd3	SET domain containing 3
MLres	ENSMUSG00000069520	-0.504254	0.03449	0.478552	0.00275355	0.0736136	0.0397151	0.46669	Tmem19	transmembrane protein 19
MLres	ENSMUSG00000022313	-0.275658	0.0119905	0.374265	0.00280095	0.0737884	0.0430756	0.475687	Utp23	UTP23, small subunit (SSU) processome component, homolog (yeast)
MLres	ENSMUSG00000046603	-0.331578	0.320169	0.790331	0.00280757	0.0737884	0.0110526	0.363797	Tcaim	T cell activation inhibitor, mitochondrial
MLres	ENSMUSG00000028530	-0.544209	0.00408121	0.310905	0.00289272	0.0746177	0.0233166	0.417729	Jak1	Janus kinase 1
MLres	ENSMUSG00000017721	-0.349582	0.00634073	0.329267	0.0029163	0.0749263	0.0272006	0.431922	Pigt	phosphatidylinositol glycan anchor biosynthesis, class T
MLres	ENSMUSG00000026773	-0.684684	0.0286957	0.458655	0.00299858	0.0757633	0.0191156	0.407587	Pfkfb3	6-phosphofructo-2-kinase/fructose-2,6-biphosphatase 3
MLres	ENSMUSG00000073423	-0.342223	0.00619946	0.329267	0.00304246	0.0762262	0.0119057	0.370142	Zfp414	zinc finger protein 414
MLres	ENSMUSG00000028138	-0.301343	0.107248	0.612258	0.00311466	0.0769568	0.0133483	0.37886	Adh5	alcohol dehydrogenase 5 (class III), chi polypeptide
MLres	ENSMUSG00000024253	-0.727146	0.0146778	0.39289	0.00315576	0.0772808	0.010446	0.36215	Dync2li1	dynein cytoplasmic 2 light intermediate chain 1
MLres	ENSMUSG00000034254	-0.282681	0.00901566	0.351939	0.00317246	0.0774523	0.0404889	0.46805	Agpat1	1-acylglycerol-3-phosphate O-acyltransferase 1 (lysophosphatidic acid acyltransferase, alpha)
MLres	ENSMUSG00000037503	-0.659583	0.00610657	0.329267	0.00319129	0.0775372	0.039367	0.465981	Fam168b	family with sequence similarity 168, member B
MLres	ENSMUSG00000018541	-0.23478	0.0267486	0.451245	0.00320415	0.0775567	0.0424189	0.474533	Cwc25	CWC25 spliceosome-associated protein homolog (S. cerevisiae)
MLres	ENSMUSG00000038400	-0.0217762	0.964969	0.99363	0.00323521	0.0778903	0.0120738	0.370843	Pmepa1	prostate transmembrane protein, androgen induced 1
MLres	ENSMUSG00000070044	-0.488393	0.0282159	0.457161	0.0033008	0.0787201	0.0100962	0.358793	Fam149a	family with sequence similarity 149, member A
MLres	ENSMUSG00000044881	-0.733479	0.0145756	0.392735	0.00337594	0.079394	0.0459042	0.486091	Coa4	cytochrome c oxidase assembly factor 4
MLres	ENSMUSG00000035268	-1.26709	0.00861602	0.351939	0.00339497	0.0794251	0.0121917	0.370843	Pkig	protein kinase inhibitor, gamma
MLres	ENSMUSG00000021982	-0.52908	0.0296363	0.463791	0.00340719	0.0794983	0.0176236	0.39998	Cdadc1	cytidine and dCMP deaminase domain containing 1
MLres	ENSMUSG00000024782	-0.41655	0.0595745	0.542072	0.00341793	0.0795384	0.0214605	0.413779	Ak3	adenylate kinase 3
MLres	ENSMUSG00000020773	-1.06604	0.00478971	0.320172	0.00350382	0.0802762	0.0115798	0.366468	Trim47	tripartite motif-containing 47
MLres	ENSMUSG00000096199	-0.406433	0.0427556	0.505419	0.00350399	0.0802762	0.0150061	0.389542	Ptrhd1	peptidyl-tRNA hydrolase domain containing 1
MLres	ENSMUSG00000001157	-0.656136	0.00722246	0.335342	0.00357395	0.0810842	0.0218524	0.414201	Gmcl1	germ cell-less homolog 1 (Drosophila)
MLres	ENSMUSG00000027243	-0.434581	0.0330938	0.474828	0.00357784	0.0810842	0.0265629	0.429727	Harbi1	harbinger transposase derived 1
MLres	ENSMUSG00000036904	-1.2687	0.0154158	0.398461	0.00374814	0.0819164	0.0197554	0.409137	Fzd8	frizzled homolog 8 (Drosophila)
MLres	ENSMUSG00000027386	-1.71698	0.0148868	0.39478	0.00387	0.0823934	0.0455304	0.484245	Fbln7	fibulin 7
MLres	ENSMUSG00000038607	-0.823701	0.0278396	0.456089	0.00390604	0.0825806	0.0149068	0.389542	Gng10	guanine nucleotide binding protein (G protein), gamma 10
MLres	ENSMUSG00000028882	-0.27414	0.0140749	0.387834	0.00392973	0.0825816	0.0138537	0.381774	Ppp1r8	protein phosphatase 1, regulatory (inhibitor) subunit 8
MLres	ENSMUSG00000024713	-1.26208	0.00859231	0.35167	0.00395247	0.0827234	0.0343151	0.45793	Pcsk5	proprotein convertase subtilisin/kexin type 5
MLres	ENSMUSG00000056310	-0.277899	0.335161	0.798138	0.00409742	0.0837063	0.0340329	0.457281	Tyw1	tRNA-yW synthesizing protein 1 homolog (S. cerevisiae)
MLres	ENSMUSG00000038178	-1.35122	0.0089272	0.351939	0.00410472	0.0837241	0.0278908	0.435146	Slc43a2	solute carrier family 43, member 2
MLres	ENSMUSG00000031864	-0.217785	0.18672	0.702365	0.0041055	0.0837241	0.0185126	0.405862	Ints10	integrator complex subunit 10
MLres	ENSMUSG00000056666	-1.01529	0.00653645	0.331155	0.00428246	0.0845936	0.0263587	0.428411	Retsat	retinol saturase (all trans retinol 13,14 reductase)
MLres	ENSMUSG00000021748	-0.285632	0.00957734	0.356244	0.00429923	0.0845936	0.0121258	0.370843	Pdhb	pyruvate dehydrogenase (lipoamide) beta
MLres	ENSMUSG00000019326	-1.84903	0.0107323	0.36483	0.00430067	0.0845936	0.0177361	0.40165	Aoc3	amine oxidase, copper containing 3
MLres	ENSMUSG00000035666	-0.65303	0.0145499	0.392735	0.0045285	0.0866656	0.0239664	0.41803	Gtf3c4	general transcription factor IIIC, polypeptide 4
MLres	ENSMUSG00000027722	-0.739704	0.0127089	0.376893	0.00455108	0.0867087	0.0263827	0.428411	Spata5	spermatogenesis associated 5
MLres	ENSMUSG00000057551	-0.566309	0.0243058	0.44145	0.00458879	0.0868215	0.0465432	0.486615	Zfp317	zinc finger protein 317
MLres	ENSMUSG00000026278	-1.05302	0.0248046	0.443095	0.0045892	0.0868215	0.0195158	0.409053	Bok	BCL2-related ovarian killer
MLres	ENSMUSG00000015837	-0.413677	0.011531	0.368429	0.00468036	0.0874169	0.0185626	0.405862	Sqstm1	sequestosome 1
MLres	ENSMUSG00000030127	-0.23443	0.0555017	0.536581	0.00473938	0.0877891	0.0214562	0.413779	Cops7a	COP9 (constitutive photomorphogenic) homolog, subunit 7a (Arabidopsis thaliana)
MLres	ENSMUSG00000030282	-0.522642	0.0139313	0.387834	0.00477531	0.0880852	0.0389153	0.465688	Cmas	cytidine monophospho-N-acetylneuraminic acid synthetase
MLres	ENSMUSG00000038582	-0.427096	0.0263714	0.448756	0.00479256	0.0882647	0.0343734	0.45793	Pptc7	PTC7 protein phosphatase homolog (S. cerevisiae)
MLres	ENSMUSG00000014329	-0.412621	0.0135403	0.385476	0.00480394	0.0883559	0.0275173	0.433691	Bicc1	bicaudal C homolog 1 (Drosophila)
MLres	ENSMUSG00000070056	-0.645523	0.0299373	0.463791	0.00481386	0.0883878	0.0156356	0.389542	Mfhas1	malignant fibrous histiocytoma amplified sequence 1
MLres	ENSMUSG00000020284	-0.353634	0.0117159	0.371579	0.00485346	0.088518	0.0236307	0.418029	1810043G02Rik	RIKEN cDNA 1810043G02 gene
MLres	ENSMUSG00000031950	-0.332332	0.00712353	0.335342	0.00486948	0.0885195	0.0455818	0.484357	Gabarapl2	gamma-aminobutyric acid (GABA) A receptor-associated protein-like 2
MLres	ENSMUSG00000025545	-0.458265	0.0245673	0.442855	0.00487978	0.0885195	0.0115656	0.366468	Clybl	citrate lyase beta like
MLres	ENSMUSG00000040234	-0.952936	0.00942424	0.355301	0.00499304	0.0892615	0.0137656	0.381478	Tm7sf3	transmembrane 7 superfamily member 3
MLres	ENSMUSG00000051650	-0.780514	0.0216308	0.430013	0.00500937	0.0892908	0.024004	0.41803	B3gnt2	UDP-GlcNAc:betaGal beta-1,3-N-acetylglucosaminyltransferase 2
MLres	ENSMUSG00000024091	-0.241748	0.0601346	0.542264	0.00509351	0.0899316	0.0472058	0.486879	Vapa	vesicle-associated membrane protein, associated protein A
MLres	ENSMUSG00000038611	0.107691	0.601298	0.909511	0.0051061	0.0900134	0.0290072	0.438706	Phrf1	PHD and ring finger domains 1
MLres	ENSMUSG00000034066	-0.39111	0.203082	0.71675	0.00518273	0.0902461	0.0206929	0.413326	Farp2	FERM, RhoGEF and pleckstrin domain protein 2
MLres	ENSMUSG00000031935	-0.320987	0.121496	0.630624	0.0052678	0.0905032	0.0252951	0.42169	Med17	mediator complex subunit 17
MLres	ENSMUSG00000028470	-0.180615	0.127623	0.638972	0.00531515	0.0908997	0.0357478	0.46065	Hint2	histidine triad nucleotide binding protein 2
MLres	ENSMUSG00000055239	-0.193305	0.0659397	0.549403	0.00544228	0.0919356	0.01518	0.389542	Kcmf1	potassium channel modulatory factor 1
MLres	ENSMUSG00000027303	-0.376227	0.00803599	0.345607	0.00545302	0.0919356	0.0429704	0.475491	Ptpra	protein tyrosine phosphatase, receptor type, A
MLres	ENSMUSG00000037907	-0.384448	0.330073	0.795723	0.0055082	0.0921059	0.0149252	0.389542	Ankrd13b	ankyrin repeat domain 13b
MLres	ENSMUSG00000010277	-0.616907	0.0213468	0.429987	0.00554557	0.0921858	0.0233786	0.417729	2610507B11Rik	RIKEN cDNA 2610507B11 gene
MLres	ENSMUSG00000033653	-0.524097	0.0113541	0.367606	0.00567497	0.0929467	0.0250212	0.420559	Vps8	vacuolar protein sorting 8 homolog (S. cerevisiae)
MLres	ENSMUSG00000032850	-0.598716	0.0402972	0.49842	0.00572676	0.093029	0.0351064	0.458626	Rnft2	ring finger protein, transmembrane 2
MLres	ENSMUSG00000027746	-0.431846	0.0302737	0.463791	0.00581002	0.0936647	0.037534	0.46257	Ufm1	ubiquitin-fold modifier 1
MLres	ENSMUSG00000030304	-0.237542	0.0175022	0.40916	0.00583604	0.0937158	0.0485067	0.490157	Ergic2	ERGIC and golgi 2
MLres	ENSMUSG00000027656	-1.74789	0.073657	0.563072	0.00585088	0.0937158	0.0191906	0.407587	Wisp2	WNT1 inducible signaling pathway protein 2
MLres	ENSMUSG00000041959	-0.767428	0.0192736	0.419382	0.00599225	0.0947557	0.0311441	0.449808	S100a10	S100 calcium binding protein A10 (calpactin)
MLres	ENSMUSG00000038991	-0.285696	0.0705787	0.557328	0.00609834	0.0955116	0.0279833	0.435425	Txndc5	thioredoxin domain containing 5
MLres	ENSMUSG00000030754	-0.0889818	0.190628	0.706562	0.00610673	0.0955116	0.0229534	0.417138	Copb1	coatomer protein complex, subunit beta 1
MLres	ENSMUSG00000049119	-0.999004	0.0202877	0.426739	0.00629191	0.0965774	0.015608	0.389542	Fam110b	family with sequence similarity 110, member B
MLres	ENSMUSG00000024527	-0.195789	0.0556128	0.536748	0.00640961	0.0971475	0.0391524	0.465688	Afg3l2	AFG3-like AAA ATPase 2
MLres	ENSMUSG00000021639	-0.406079	0.0345879	0.478552	0.00644366	0.0971475	0.0314946	0.450593	Gtf2h2	general transcription factor II H, polypeptide 2
MLres	ENSMUSG00000047187	-0.205843	0.0853376	0.582001	0.00668395	0.0985659	0.0496061	0.491964	Rab2a	RAB2A, member RAS oncogene family
MLres	ENSMUSG00000041180	-0.928841	0.0629487	0.544264	0.00668729	0.0985659	0.0212569	0.413463	Hectd2	HECT domain containing 2
MLres	ENSMUSG00000021669	-0.370103	0.0302712	0.463791	0.00668933	0.0985659	0.0419496	0.472779	Col4a3bp	collagen, type IV, alpha 3 (Goodpasture antigen) binding protein
MLres	ENSMUSG00000062203	-0.309366	0.0161071	0.401214	0.00669828	0.0986358	0.0334874	0.456863	Gspt1	G1 to S phase transition 1
MLres	ENSMUSG00000014402	-0.120242	0.297913	0.77785	0.00678151	0.099091	0.036395	0.461275	Tsg101	tumor susceptibility gene 101
MLres	ENSMUSG00000003545	-0.935773	0.00980228	0.356925	0.00680997	0.0991948	0.0436548	0.478201	Fosb	FBJ osteosarcoma oncogene B
MLres	ENSMUSG00000030557	-0.35449	0.0189552	0.417839	0.00684166	0.0992834	0.0402054	0.46742	Mef2a	myocyte enhancer factor 2A
MLres	ENSMUSG00000016256	-0.865169	0.00556743	0.323475	0.00690343	0.0995551	0.0214617	0.413779	Ctsz	cathepsin Z
MLres	ENSMUSG00000005936	-0.265714	0.0374399	0.489843	0.00691833	0.0995551	0.0435202	0.477897	Kctd20	potassium channel tetramerisation domain containing 20
MLres	ENSMUSG00000026155	-0.36715	0.0216476	0.430013	0.0069728	0.0998448	0.0250009	0.420525	Smap1	small ArfGAP 1
MLres	ENSMUSG00000024359	-0.333164	0.0997344	0.603284	0.00702391	0.100061	0.035186	0.458626	Hspa9	heat shock protein 9
MLres	ENSMUSG00000041975	-0.726402	0.0137511	0.386092	0.00713629	0.100517	0.0347451	0.458564	Mettl8	methyltransferase like 8
MLres	ENSMUSG00000025133	-0.298812	0.144628	0.658124	0.00713861	0.100517	0.0176537	0.400178	Ints4	integrator complex subunit 4
MLres	ENSMUSG00000042766	-1.40991	0.014051	0.387834	0.0071758	0.100768	0.014266	0.385117	Trim46	tripartite motif-containing 46
MLres	ENSMUSG00000037251	-0.370152	0.032654	0.473696	0.00742241	0.102206	0.0193361	0.407587	Pomk	protein-O-mannose kinase
MLres	ENSMUSG00000029622	-0.402754	0.0140839	0.387834	0.00756261	0.102657	0.0220779	0.41455	Arpc1b	actin related protein 2/3 complex, subunit 1B
MLres	ENSMUSG00000029478	-0.275765	0.0245952	0.442855	0.00757299	0.102661	0.0263329	0.428411	Ncor2	nuclear receptor co-repressor 2
MLres	ENSMUSG00000074247	-0.162642	0.347509	0.803862	0.00771636	0.103037	0.0400669	0.467075	Dda1	DET1 and DDB1 associated 1
MLres	ENSMUSG00000007656	-0.557571	0.0226724	0.435183	0.00793353	0.103715	0.0159945	0.389542	Arpp19	cAMP-regulated phosphoprotein 19
MLres	ENSMUSG00000047712	-0.640161	0.021445	0.429987	0.00793879	0.103735	0.0370702	0.46257	Ust	uronyl-2-sulfotransferase
MLres	ENSMUSG00000005882	-0.411568	0.0183398	0.415722	0.00795775	0.103784	0.0467241	0.486615	Uqcc1	ubiquinol-cytochrome c reductase complex assembly factor 1
MLres	ENSMUSG00000044408	-0.479556	0.02166	0.430013	0.00803581	0.103928	0.029198	0.439644	Sptssa	serine palmitoyltransferase, small subunit A
MLres	ENSMUSG00000026484	-0.464689	0.0187844	0.417759	0.00820364	0.104709	0.0424098	0.474533	Rnf2	ring finger protein 2
MLres	ENSMUSG00000033272	-0.205445	0.0488093	0.523975	0.00836051	0.105027	0.0364214	0.461361	Slc35a4	solute carrier family 35, member A4
MLres	ENSMUSG00000037855	-0.593365	0.259317	0.753545	0.00843734	0.105315	0.0350716	0.458626	Zfp365	zinc finger protein 365
MLres	ENSMUSG00000021661	-0.38804	0.0465758	0.51783	0.00845058	0.10537	0.0383365	0.464851	Ankra2	ankyrin repeat, family A (RFXANK-like), 2
MLres	ENSMUSG00000037325	-0.339638	0.0464865	0.517503	0.00849762	0.105406	0.0437181	0.478403	Bbs7	Bardet-Biedl syndrome 7 (human)
MLres	ENSMUSG00000043822	-1.28857	0.0866269	0.583852	0.00855123	0.105725	0.0498677	0.49203	Adamtsl5	ADAMTS-like 5
MLres	ENSMUSG00000021186	-1.06926	0.0157895	0.398945	0.00861203	0.105933	0.032804	0.454943	Fbln5	fibulin 5
MLres	ENSMUSG00000038975	-0.149132	0.459603	0.860058	0.00865854	0.105975	0.0351025	0.458626	Rabggtb	Rab geranylgeranyl transferase, b subunit
MLres	ENSMUSG00000032492	-1.74315	0.0497282	0.525281	0.00877677	0.106138	0.0362912	0.461121	Pth1r	parathyroid hormone 1 receptor
MLres	ENSMUSG00000034620	-0.27235	0.321362	0.791088	0.00896332	0.106828	0.0263282	0.428411	Tmem5	transmembrane protein 5
MLres	ENSMUSG00000057098	-1.19097	0.0190028	0.417839	0.0090176	0.106931	0.0449767	0.482666	Ebf1	early B cell factor 1
MLres	ENSMUSG00000027378	-0.425354	0.253984	0.750603	0.0090579	0.106994	0.0197915	0.409137	Nphp1	nephronophthisis 1 (juvenile) homolog (human)
MLres	ENSMUSG00000061062	-0.273239	0.0752814	0.566183	0.00906321	0.10701	0.0173689	0.397961	Gm10093	predicted pseudogene 10093
MLres	ENSMUSG00000043518	-0.369766	0.516353	0.881141	0.00912235	0.107363	0.0306972	0.448097	Rai2	retinoic acid induced 2
MLres	ENSMUSG00000029524	-0.35486	0.100588	0.604576	0.0091482	0.107392	0.0391235	0.465688	Sirt4	sirtuin 4
MLres	ENSMUSG00000038005	-0.328049	0.0218319	0.430013	0.00915977	0.107469	0.0260233	0.426184	2700029M09Rik	RIKEN cDNA 2700029M09 gene
MLres	ENSMUSG00000031479	-0.437409	0.014541	0.392735	0.00920983	0.107582	0.0244107	0.418823	Vps36	vacuolar protein sorting 36 (yeast)
MLres	ENSMUSG00000027427	-0.403449	0.0192227	0.419382	0.00923082	0.107689	0.0366461	0.46257	Polr3f	polymerase (RNA) III (DNA directed) polypeptide F
MLres	ENSMUSG00000034686	-0.527763	0.435473	0.849835	0.00969278	0.109857	0.032681	0.454718	Prr7	proline rich 7 (synaptic)
MLres	ENSMUSG00000006276	-0.216424	0.0674243	0.55288	0.00988364	0.11071	0.0238397	0.41803	Eps15l1	epidermal growth factor receptor pathway substrate 15-like 1
MLres	ENSMUSG00000023942	-1.32515	0.0126401	0.375823	0.00989806	0.11074	0.0326678	0.454718	Slc29a1	solute carrier family 29 (nucleoside transporters), member 1

## Sheet: E. FTMres
Trait	Gene ID	coef.all	p value.all	q value.all	p value.robust	q value.robust	p value.max	q value.max	Symbol	Description
FTMres	ENSMUSG00000038305	1.48979	0.000101503	0.13423	1.01481e-05	0.0214423	6.6111e-05	0.182564	Spats2l	spermatogenesis associated, serine-rich 2-like
FTMres	ENSMUSG00000050240	0.644477	9.89798e-06	0.067097	1.06507e-05	0.0214423	5.0612e-05	0.182564	Hic2	hypermethylated in cancer 2
FTMres	ENSMUSG00000004661	0.415304	0.0232522	0.437129	2.49258e-05	0.0272126	0.000152778	0.231034	Arid3b	AT rich interactive domain 3B (BRIGHT-like)
FTMres	ENSMUSG00000038056	0.419048	0.000980885	0.227375	2.74209e-05	0.0276201	0.000324992	0.231034	Kmt2c	lysine (K)-specific methyltransferase 2C
FTMres	ENSMUSG00000093445	0.23132	5.17923e-05	0.12157	3.28898e-05	0.0283573	0.000147172	0.231034	Lrch4	leucine-rich repeats and calponin homology (CH) domain containing 4
FTMres	ENSMUSG00000023456	0.494558	0.000245805	0.172581	4.41846e-05	0.029522	0.000206285	0.231034	Tpi1	triosephosphate isomerase 1
FTMres	ENSMUSG00000036606	0.396761	0.0001019	0.13423	4.49776e-05	0.029522	0.000376238	0.231034	Plxnb2	plexin B2
FTMres	ENSMUSG00000028655	1.07448	0.000237327	0.172581	5.11981e-05	0.0312142	0.000245819	0.231034	Mfsd2a	major facilitator superfamily domain containing 2A
FTMres	ENSMUSG00000031166	0.391771	0.0254178	0.446036	6.28205e-05	0.031935	0.000584316	0.238146	Wdr13	WD repeat domain 13
FTMres	ENSMUSG00000028454	0.626391	0.000743093	0.214015	6.8792e-05	0.0322944	0.000410606	0.231034	Pigo	phosphatidylinositol glycan anchor biosynthesis, class O
FTMres	ENSMUSG00000053134	0.398191	0.000501009	0.194259	7.4924e-05	0.0324455	0.000573229	0.238146	Supt7l	suppressor of Ty 7-like
FTMres	ENSMUSG00000029104	0.341476	0.0240824	0.44145	7.62367e-05	0.0324455	0.000547432	0.238146	Htt	huntingtin
FTMres	ENSMUSG00000030380	0.589973	0.000943019	0.2262	8.7814e-05	0.0324455	0.000625974	0.238146	Mzf1	myeloid zinc finger 1
FTMres	ENSMUSG00000031090	0.712391	0.000155927	0.148685	9.57298e-05	0.0324457	0.000472452	0.231034	Nadsyn1	NAD synthetase 1
FTMres	ENSMUSG00000030826	0.388031	0.00111379	0.232885	0.000107622	0.0339017	0.000439372	0.231034	Bcat2	branched chain aminotransferase 2, mitochondrial
FTMres	ENSMUSG00000004815	0.458521	0.000180869	0.154852	0.000112779	0.0339017	0.000633736	0.238146	Dgkq	diacylglycerol kinase, theta
FTMres	ENSMUSG00000021285	0.396045	0.0240245	0.44145	0.000113092	0.0339017	0.000905889	0.254225	Ppp1r13b	protein phosphatase 1, regulatory (inhibitor) subunit 13B
FTMres	ENSMUSG00000022562	0.655852	0.00473889	0.318265	0.000115617	0.0339017	0.000458567	0.231034	Oplah	5-oxoprolinase (ATP-hydrolysing)
FTMres	ENSMUSG00000038312	0.470792	0.000949285	0.2262	0.000115792	0.0339017	0.00147306	0.272256	Edem2	ER degradation enhancer, mannosidase alpha-like 2
FTMres	ENSMUSG00000033276	0.546902	0.000516706	0.194582	0.000116937	0.0339017	0.000630561	0.238146	Stk36	serine/threonine kinase 36
FTMres	ENSMUSG00000033763	0.489682	0.0134941	0.385312	0.000119263	0.0339321	0.000472381	0.231034	Mtss1l	metastasis suppressor 1-like
FTMres	ENSMUSG00000037012	0.210765	0.0632242	0.544809	0.000126876	0.0341287	0.000584162	0.238146	Hk1	hexokinase 1
FTMres	ENSMUSG00000021311	0.523509	0.0257531	0.448269	0.000127887	0.0341287	0.00157062	0.276893	Mtr	5-methyltetrahydrofolate-homocysteine methyltransferase
FTMres	ENSMUSG00000079109	0.382911	0.0226838	0.435183	0.000160188	0.0350996	0.0010761	0.257482	Pms2	postmeiotic segregation increased 2 (S. cerevisiae)
FTMres	ENSMUSG00000029263	0.579928	0.00733801	0.33806	0.000173732	0.0361768	0.00141405	0.272256	Pigg	phosphatidylinositol glycan anchor biosynthesis, class G
FTMres	ENSMUSG00000049502	1.16068	0.000481319	0.193124	0.000189393	0.0369805	0.00079808	0.254225	Dtx3l	deltex 3-like (Drosophila)
FTMres	ENSMUSG00000024384	0.366368	0.000530546	0.194582	0.000201485	0.0369805	0.0011	0.257482	Iws1	IWS1 homolog (S. cerevisiae)
FTMres	ENSMUSG00000031709	0.466559	0.0343348	0.478421	0.000242286	0.0382654	0.000789547	0.254225	Tbc1d9	TBC1 domain family, member 9
FTMres	ENSMUSG00000025008	0.480712	0.0261111	0.448756	0.000243255	0.0382654	0.00378014	0.322742	Tctn3	tectonic family member 3
FTMres	ENSMUSG00000039741	0.348949	0.0018735	0.27182	0.000258902	0.0390809	0.00159453	0.276893	Bahcc1	BAH domain and coiled-coil containing 1
FTMres	ENSMUSG00000021109	0.439415	0.000639223	0.205536	0.000269614	0.03919	0.00176387	0.288518	Hif1a	hypoxia inducible factor 1, alpha subunit
FTMres	ENSMUSG00000030752	0.431729	0.0524957	0.530708	0.000271722	0.03919	0.00152187	0.275044	Kdm8	lysine (K)-specific demethylase 8
FTMres	ENSMUSG00000021275	0.385779	0.0291211	0.461129	0.000272361	0.03919	0.00250811	0.308039	Tecpr2	tectonin beta-propeller repeat containing 2
FTMres	ENSMUSG00000030967	0.399908	0.000468261	0.191387	0.000284306	0.0398411	0.00119345	0.259189	Zranb1	zinc finger, RAN-binding domain containing 1
FTMres	ENSMUSG00000022641	0.433701	0.0010134	0.229074	0.000298698	0.0402942	0.00107009	0.257482	Bbx	bobby sox homolog (Drosophila)
FTMres	ENSMUSG00000040033	0.600328	0.0102078	0.360304	0.000301249	0.040401	0.00130101	0.272256	Stat2	signal transducer and activator of transcription 2
FTMres	ENSMUSG00000033985	0.230753	0.0472439	0.520679	0.000315383	0.0411482	0.00143146	0.272256	Tesk2	testis-specific kinase 2
FTMres	ENSMUSG00000098789	0.369828	0.00359853	0.298946	0.000326898	0.0414763	0.00130633	0.272256	Jmjd7	jumonji domain containing 7
FTMres	ENSMUSG00000007038	0.510567	0.00236704	0.281318	0.00033162	0.0416681	0.00249955	0.308039	Neu1	neuraminidase 1
FTMres	ENSMUSG00000025507	0.508942	0.00720827	0.335342	0.000348838	0.0425985	0.00197201	0.302102	Pidd1	p53 induced death domain protein 1
FTMres	ENSMUSG00000025764	0.687678	0.00504521	0.320172	0.000351169	0.0425985	0.00284797	0.31317	Jade1	jade family PHD finger 1
FTMres	ENSMUSG00000005674	0.420198	0.00152693	0.256078	0.000369335	0.0434547	0.00318836	0.315622	Tomm40l	translocase of outer mitochondrial membrane 40 homolog-like (yeast)
FTMres	ENSMUSG00000030522	0.434421	0.00423482	0.311274	0.000373273	0.0436051	0.00192836	0.300753	Mtmr10	myotubularin related protein 10
FTMres	ENSMUSG00000041762	0.638361	0.000771453	0.215408	0.000378731	0.0436404	0.00199046	0.302102	Gpr155	G protein-coupled receptor 155
FTMres	ENSMUSG00000025925	0.486311	0.0428338	0.505616	0.000379404	0.0436404	0.00690992	0.348758	Terf1	telomeric repeat binding factor 1
FTMres	ENSMUSG00000022358	0.765323	0.000623675	0.205262	0.000384594	0.0436404	0.0036026	0.322742	Fbxo32	F-box protein 32
FTMres	ENSMUSG00000020069	0.193287	0.141638	0.656214	0.000394277	0.0436404	0.00161703	0.276893	Hnrnph3	heterogeneous nuclear ribonucleoprotein H3
FTMres	ENSMUSG00000015882	0.51911	0.00424603	0.311274	0.00041279	0.0437263	0.00131494	0.272256	Lcorl	ligand dependent nuclear receptor corepressor-like
FTMres	ENSMUSG00000034538	0.909778	0.00282662	0.288236	0.000441688	0.044881	0.0013251	0.272256	Zfp418	zinc finger protein 418
FTMres	ENSMUSG00000025314	0.759338	0.00948946	0.356244	0.000453873	0.0452197	0.00512571	0.331899	Ptprj	protein tyrosine phosphatase, receptor type, J
FTMres	ENSMUSG00000029034	0.320915	0.000901843	0.225197	0.000454654	0.0452197	0.00201501	0.302102	Cpsf3l	cleavage and polyadenylation specific factor 3-like
FTMres	ENSMUSG00000025855	1.52467	0.000570014	0.201696	0.000459029	0.0454622	0.00266752	0.311381	Prkar1b	protein kinase, cAMP dependent regulatory, type I beta
FTMres	ENSMUSG00000029538	0.367756	0.00550034	0.323475	0.00046096	0.0455574	0.00239288	0.303324	Srsf9	serine/arginine-rich splicing factor 9
FTMres	ENSMUSG00000030516	0.466616	0.000571851	0.201696	0.000473332	0.0460459	0.00377284	0.322742	Tjp1	tight junction protein 1
FTMres	ENSMUSG00000041229	0.383285	0.000841851	0.217608	0.000490851	0.046336	0.00489208	0.331599	Phf8	PHD finger protein 8
FTMres	ENSMUSG00000090290	0.565618	0.00937619	0.355301	0.000518715	0.0471008	0.00221105	0.303112	Gm17296	predicted gene, 17296
FTMres	ENSMUSG00000063810	0.399132	0.00589614	0.328195	0.000595866	0.0491615	0.00230079	0.303324	Alms1	Alstrom syndrome 1
FTMres	ENSMUSG00000032826	0.483898	0.00392784	0.30671	0.00061474	0.0499051	0.00513441	0.332004	Ank2	ankyrin 2, brain
FTMres	ENSMUSG00000031310	0.374189	0.00515115	0.320173	0.000622313	0.0499648	0.00217129	0.302327	Zmym3	zinc finger, MYM-type 3
FTMres	ENSMUSG00000066191	0.357474	0.0031767	0.292544	0.000640195	0.0505756	0.00339877	0.320392	Anks6	ankyrin repeat and sterile alpha motif domain containing 6
FTMres	ENSMUSG00000022463	0.406802	0.0213573	0.429987	0.000652395	0.0509714	0.00202575	0.302102	Srebf2	sterol regulatory element binding factor 2
FTMres	ENSMUSG00000025487	0.217574	0.00785991	0.342124	0.000679373	0.0509714	0.00277179	0.311886	Psmd13	proteasome (prosome, macropain) 26S subunit, non-ATPase, 13
FTMres	ENSMUSG00000040532	0.422349	0.00454702	0.316162	0.000706798	0.0515319	0.00452039	0.331599	Abhd11	abhydrolase domain containing 11
FTMres	ENSMUSG00000003184	0.370898	0.002589	0.286941	0.00071107	0.0515334	0.00656629	0.345581	Irf3	interferon regulatory factor 3
FTMres	ENSMUSG00000021338	0.587368	0.00423924	0.311274	0.000714052	0.0515334	0.00591061	0.339669	Lrrc16a	leucine rich repeat containing 16A
FTMres	ENSMUSG00000030513	1.1269	0.0156712	0.398945	0.000748441	0.0525195	0.00269919	0.311381	Pcsk6	proprotein convertase subtilisin/kexin type 6
FTMres	ENSMUSG00000006494	0.507914	0.0086999	0.351939	0.000772185	0.0529341	0.00433328	0.327578	Pdk1	pyruvate dehydrogenase kinase, isoenzyme 1
FTMres	ENSMUSG00000046572	0.462684	0.0690853	0.556244	0.000775796	0.0529481	0.003088	0.314657	Zfp518b	zinc finger protein 518B
FTMres	ENSMUSG00000027680	0.120974	0.0206372	0.42811	0.000784047	0.0530227	0.0056539	0.337827	Fxr1	fragile X mental retardation gene 1, autosomal homolog
FTMres	ENSMUSG00000002814	0.409597	0.0199685	0.424414	0.00079654	0.0530227	0.00733667	0.350865	Top3a	topoisomerase (DNA) III alpha
FTMres	ENSMUSG00000031060	0.15871	0.0240493	0.44145	0.000806944	0.0533479	0.00304836	0.314657	Rbm10	RNA binding motif protein 10
FTMres	ENSMUSG00000095567	0.200253	0.0713805	0.558214	0.000809111	0.0533479	0.00297589	0.314647	Noc2l	nucleolar complex associated 2 homolog (S. cerevisiae)
FTMres	ENSMUSG00000053646	0.710195	0.043147	0.506683	0.000869054	0.0542256	0.00510558	0.331899	Plxnb1	plexin B1
FTMres	ENSMUSG00000038888	0.480059	0.0290991	0.461129	0.000877219	0.0543286	0.00389751	0.322742	Ctu1	cytosolic thiouridylase subunit 1 homolog (S. pombe)
FTMres	ENSMUSG00000008435	0.551089	0.00647993	0.331155	0.000883901	0.0545984	0.00385545	0.322742	Rdh13	retinol dehydrogenase 13 (all-trans and 9-cis)
FTMres	ENSMUSG00000017132	0.236731	0.239553	0.741267	0.000889268	0.0546897	0.00433207	0.327578	Cyth1	cytohesin 1
FTMres	ENSMUSG00000006711	1.11691	0.00811914	0.346188	0.000898758	0.0548516	0.00240973	0.304098	D130043K22Rik	RIKEN cDNA D130043K22 gene
FTMres	ENSMUSG00000045594	0.734404	0.00359315	0.298946	0.000911699	0.0550833	0.00788661	0.353806	Glb1	galactosidase, beta 1
FTMres	ENSMUSG00000038039	0.278002	0.00382356	0.302693	0.000916208	0.0552123	0.00629502	0.345056	Gcc2	GRIP and coiled-coil domain containing 2
FTMres	ENSMUSG00000023330	0.459666	0.0276028	0.454991	0.000917363	0.0552123	0.00774989	0.352572	Dtwd1	DTW domain containing 1
FTMres	ENSMUSG00000022951	0.0318073	0.905566	0.982278	0.000921021	0.0552445	0.00302449	0.314657	Rcan1	regulator of calcineurin 1
FTMres	ENSMUSG00000039774	0.562146	0.00690156	0.335342	0.000932427	0.0553341	0.00364494	0.322742	Galnt12	UDP-N-acetyl-alpha-D-galactosamine:polypeptide N-acetylgalactosaminyltransferase 12
FTMres	ENSMUSG00000021670	0.400878	0.00716661	0.335342	0.000940214	0.0554079	0.00828151	0.356022	Hmgcr	3-hydroxy-3-methylglutaryl-Coenzyme A reductase
FTMres	ENSMUSG00000029094	0.435624	0.00623105	0.329267	0.000965563	0.0556899	0.00956848	0.357379	Afap1	actin filament associated protein 1
FTMres	ENSMUSG00000049287	0.419722	0.0497989	0.525281	0.000968005	0.0556899	0.00278595	0.312139	Iba57	IBA57, iron-sulfur cluster assembly homolog (S. cerevisiae)
FTMres	ENSMUSG00000000568	0.248043	0.00332954	0.295166	0.000987668	0.0562393	0.00380248	0.322742	Hnrnpd	heterogeneous nuclear ribonucleoprotein D
FTMres	ENSMUSG00000030530	0.306161	0.041732	0.502519	0.00102412	0.0567621	0.00772842	0.352572	Furin	furin (paired basic amino acid cleaving enzyme)
FTMres	ENSMUSG00000054520	0.53203	0.00317829	0.292544	0.00102719	0.0568089	0.00268407	0.311381	Sh3bp2	SH3-domain binding protein 2
FTMres	ENSMUSG00000028670	0.327542	0.00913132	0.352826	0.00104342	0.0568144	0.0111955	0.364222	Lypla2	lysophospholipase 2
FTMres	ENSMUSG00000022476	0.372891	0.00174199	0.267452	0.0010698	0.0571679	0.00312407	0.314657	Polr3h	polymerase (RNA) III (DNA directed) polypeptide H
FTMres	ENSMUSG00000039967	0.27767	0.0105402	0.362847	0.00108884	0.0573059	0.0046763	0.331599	Zfp292	zinc finger protein 292
FTMres	ENSMUSG00000024219	0.33485	0.00371625	0.300275	0.00108887	0.0573059	0.00522381	0.333059	Anks1	ankyrin repeat and SAM domain containing 1
FTMres	ENSMUSG00000035692	1.7418	0.00196991	0.271992	0.00110925	0.0576434	0.00689037	0.348758	Isg15	ISG15 ubiquitin-like modifier
FTMres	ENSMUSG00000027510	0.647286	0.0203173	0.427137	0.001158	0.058344	0.00573716	0.339208	Rbm38	RNA binding motif protein 38
FTMres	ENSMUSG00000029165	0.437134	0.00509126	0.320172	0.00116121	0.058344	0.00349867	0.322742	Agbl5	ATP/GTP binding protein-like 5
FTMres	ENSMUSG00000034300	0.149156	0.0955465	0.596898	0.00117111	0.058344	0.0154764	0.389542	Fam53c	family with sequence similarity 53, member C
FTMres	ENSMUSG00000036931	0.570466	0.00326158	0.29487	0.00119789	0.0585295	0.00639132	0.345056	Nfkbid	nuclear factor of kappa light polypeptide gene enhancer in B cells inhibitor, delta
FTMres	ENSMUSG00000062054	0.166927	0.112586	0.619142	0.00120477	0.0585295	0.00561258	0.337798	Iah1	isoamyl acetate-hydrolyzing esterase 1 homolog (S. cerevisiae)
FTMres	ENSMUSG00000056673	0.460145	0.00209678	0.273435	0.00122183	0.0585295	0.0041259	0.323682	Kdm5d	lysine (K)-specific demethylase 5D
FTMres	ENSMUSG00000066705	1.03196	0.0167889	0.402943	0.00122557	0.0585295	0.00665967	0.34699	Fxyd6	FXYD domain-containing ion transport regulator 6
FTMres	ENSMUSG00000027615	0.416505	0.00216127	0.275581	0.00123095	0.0585486	0.00359074	0.322742	Hps3	Hermansky-Pudlak syndrome 3 homolog (human)
FTMres	ENSMUSG00000024939	0.200164	0.031625	0.469173	0.00125731	0.0589938	0.0113306	0.365091	Fam89b	family with sequence similarity 89, member B
FTMres	ENSMUSG00000001248	0.339251	0.00359969	0.298946	0.00127478	0.0589938	0.00389905	0.322742	Gramd1a	GRAM domain containing 1A
FTMres	ENSMUSG00000022360	0.433828	0.0275585	0.454935	0.00128254	0.0589938	0.00893165	0.357379	Atad2	ATPase family, AAA domain containing 2
FTMres	ENSMUSG00000039826	0.414241	0.0126025	0.375823	0.00134041	0.0597584	0.0123087	0.371597	Trub2	TruB pseudouridine (psi) synthase homolog 2 (E. coli)
[truncated: 688 more rows]

## Sheet: F. Summary
ID	Symbol	Description	AW	ML	FTM	MLres	FTMres
[truncated: 827 more rows]

[truncated: 3 more sheets: G. Positive Enrichment, H. Negative Enrichment, I. Gene Network Analysis]
