# Supplementary material for: Cell culture-based profiling across mammals reveals DNA repair and metabolism as determinants of species longevity
Source: eLife. 2016 Nov 22;5:e19130. doi: 10.7554/eLife.19130 (PMC5148604; doi:10.7554/eLife.19130)
Supplement: Table 2—source data 1. — Regression against (A) Adult Weight; (B) Maximum Lifespan; (C) Female Time to Maturity; (D) Maximum Lifespan Residual; and (E) Female Time to Maturity Residual. ‘coef.all’, ‘p value.all’, and ‘q value.all’ refer to the regression slope, p value, and FDR-adjusted q value using all the species. ‘p value.robust’ and ‘q value.robust’ refer to the statistics after removing the potential outlier point. ‘p value.max’ and ‘q value.max’ refer to the maximal (least significant) regression p value and q value when each one of the species was left out, one at a time. Only genes with p value.robust < 0.01 and p value.max < 0.05 are shown. (F) Top hits identified by two or more longevity traits. The p value.robust against each of the four longevity traits (ML, FTM, MLres, and FTMres) as well as adult weight (AW) are shown. These metabolites were the input for pathway enrichment analysis. Pathway enrichment analysis of metabolites showing (G) positive and (H) negative correlation with longevity traits. Enrichment was performed based on hypergeometric statistics. (I) Top hits identified by two or more longevity traits, using cut-off of p value.robust < 0.05. The p value.robust against each of the four longevity traits (ML, FTM, MLres, and FTMres) as well as adult weight (AW) are shown. DOI: http://dx.doi.org/10.7554/eLife.19130.014 [file elife-19130-table2-data1.xlsx]

## Sheet: A. AW
Trait	Metabolite	coef.all	p.value.all	q.value.all	p.value.robust	q.value.robust	p.value.max	q.value.max
AW	lysine	0.139072	0.000669788	0.256235	0.000197856	0.0451418	0.00123677	0.335013
AW	C2.carnitine	0.271828	0.0393642	0.576611	0.0059856	0.100347	0.0198398	0.38618
AW	proline	0.139324	0.0171213	0.537242	0.00960544	0.110405	0.0462403	0.426085
AW	cytidine	-0.641237	0.00231333	0.355747	0.000189239	0.0451418	0.0114879	0.38618
AW	cytosine	-0.383458	0.00588207	0.419098	0.000778532	0.052146	0.0249059	0.392491
AW	C24.0.SM	-0.075594	0.0423412	0.576611	0.00424526	0.0948941	0.0165504	0.38618
AW	C18.1.LPC	-0.175928	0.0742761	0.651344	0.00485109	0.100347	0.0226584	0.38618
AW	C16.0.LPC	-0.13473	0.0195432	0.537242	0.0053467	0.100347	0.0227465	0.38618
AW	C18.0.SM	-0.159376	0.0109704	0.523572	0.00595533	0.100347	0.0446252	0.426085
AW	aspartate	-0.145905	0.033626	0.551621	0.00653775	0.103064	0.0241823	0.392491
AW	C18.1.LPE	-0.105361	0.263862	0.789988	0.00706402	0.103064	0.0219933	0.38618
AW	C20.4.LPC	-0.163272	0.0322209	0.551621	0.00945759	0.110405	0.0370856	0.41748
AW	guanine	-0.394851	0.273598	0.802057	0.0098662	0.110405	0.0445086	0.426085

## Sheet: B. ML
Trait	Metabolite	coef.all	p.value.all	q.value.all	p.value.robust	q.value.robust	p.value.max	q.value.max
ML	pyroglutamic.acid	1.08482	0.0280584	0.551621	0.0011717	0.0607155	0.00694315	0.359781
ML	lysine	0.461354	0.00559644	0.419098	0.00150783	0.0687571	0.00871448	0.370225
ML	ADP	1.93442	0.00794546	0.503213	0.00171662	0.0691454	0.00909325	0.370225
ML	histamine	0.36214	0.00978535	0.523572	0.00226265	0.0719286	0.00951263	0.373945
ML	arginine	0.479417	0.0111258	0.523572	0.00360287	0.0863919	0.0141474	0.38618
ML	adenosine	1.82425	0.0207356	0.537242	0.00399259	0.0910311	0.0143794	0.38618
ML	GDP	1.91072	0.0171671	0.537242	0.00474164	0.100101	0.0262825	0.392491
ML	proline	0.533179	0.0138089	0.523572	0.00535176	0.100347	0.0213231	0.38618
ML	glutamate	0.41563	0.0594868	0.6165	0.00574349	0.100347	0.0179068	0.38618
ML	sorbitol	1.57786	0.0150569	0.523572	0.00589131	0.100347	0.0347972	0.408956
ML	methionine	0.378712	0.0288766	0.551621	0.00730429	0.103064	0.0291388	0.392491
ML	leucine	0.556058	0.0423392	0.576611	0.00740442	0.103064	0.0262777	0.392491
ML	CDP	1.73657	0.0280144	0.551621	0.0074499	0.103064	0.0239349	0.392491
ML	tryptophan	0.451759	0.125745	0.702388	0.00847553	0.105497	0.0187674	0.38618
ML	cotinine	0.462269	0.0657295	0.626943	0.00860631	0.105497	0.0433772	0.426085
ML	C16.0.LPC	-0.540744	0.00992723	0.523572	0.000612204	0.052146	0.00309997	0.335013
ML	C20.4.LPE	-0.849476	0.00494889	0.419098	0.000706631	0.052146	0.00352645	0.335013
ML	X2.deoxycytidine	-1.64122	0.000989228	0.28193	0.000784055	0.052146	0.00466645	0.359781
ML	malondialdehyde	-0.962989	0.0276893	0.551621	0.0008691	0.052146	0.00623651	0.359781
ML	cytidine	-2.30877	0.00363198	0.376406	0.00157187	0.0689204	0.0086364	0.370225
ML	C36.4.PC.B	-0.111268	0.0750129	0.651721	0.00291822	0.0756085	0.0114547	0.38618
ML	C18.1.LPC	-0.731557	0.0314401	0.551621	0.00494002	0.100347	0.0169092	0.38618
ML	C36.4.PC.A	-0.305968	0.330434	0.819756	0.00727384	0.103064	0.0306335	0.392491
ML	X3.phosphoglycerate	-2.29648	0.0241438	0.550479	0.00888282	0.10692	0.0299583	0.392491
ML	kynurenine.vs.tryptophan	0.495929	0.567871	0.920528	0.00962181	0.110405	0.0293303	0.392491
ML	C18.0.SM	-0.544264	0.0257297	0.551621	0.00982001	0.110405	0.0384138	0.41748

## Sheet: C. FTM
Trait	Metabolite	coef.all	p.value.all	q.value.all	p.value.robust	q.value.robust	p.value.max	q.value.max
FTM	adenosine	1.02023	0.00307455	0.355747	0.000831434	0.052146	0.00294932	0.335013
FTM	lysine	0.224759	0.00441875	0.419098	0.00103858	0.0563803	0.00898734	0.370225
FTM	arginine	0.185388	0.0550697	0.597899	0.00215102	0.0719286	0.00992335	0.377087
FTM	sorbitol	0.736804	0.0187916	0.537242	0.0024783	0.0724427	0.0207661	0.38618
FTM	histamine	0.164105	0.0168305	0.537242	0.00440921	0.0966635	0.0145584	0.38618
FTM	leucine	0.185407	0.182509	0.736275	0.00573462	0.100347	0.0175849	0.38618
FTM	tryptophan	0.160285	0.258759	0.789988	0.00751363	0.103064	0.0213656	0.38618
FTM	ADP	0.855013	0.0178164	0.537242	0.00807491	0.105497	0.0230183	0.38618
FTM	C16.0.LPC	-0.151078	0.196988	0.7363	0.000133821	0.0451418	0.00083776	0.335013
FTM	X2.deoxycytidine	-0.73626	0.00287041	0.355747	0.000659162	0.052146	0.0103487	0.380566
FTM	C20.4.LPE	-0.318004	0.0450036	0.576611	0.000849819	0.052146	0.00314541	0.335013
FTM	cytidine	-1.02965	0.00909472	0.523572	0.00175896	0.0691454	0.0126898	0.38618
FTM	C18.1.LPC	-0.141794	0.462593	0.878283	0.00239762	0.0719286	0.0195865	0.38618
FTM	C36.4.PC.A	-0.077495	0.57286	0.921101	0.00281722	0.0756085	0.0206987	0.38618
FTM	X2.aminoadipate	-0.11266	0.526252	0.897383	0.00372267	0.0866091	0.0229163	0.38618
FTM	C22.6.LPE	-0.183858	0.216904	0.753875	0.00537493	0.100347	0.018338	0.38618
FTM	alpha.glycerophosphate	-0.346233	0.0441423	0.576611	0.00694871	0.103064	0.0186985	0.38618
FTM	C18.0.LPC	-0.1587	0.126741	0.702388	0.00760407	0.103064	0.0216225	0.38618
FTM	C36.4.PC.B	-0.0527939	0.0781717	0.65685	0.00858657	0.105497	0.0272138	0.392491
FTM	C18.0.SM	-0.209099	0.092589	0.668047	0.00891	0.10692	0.0303611	0.392491

## Sheet: D. MLres
Trait	Metabolite	coef.all	p.value.all	q.value.all	p.value.robust	q.value.robust	p.value.max	q.value.max
MLres	GDP	3.87836	0.00312059	0.355747	0.000435345	0.052146	0.00648655	0.359781
MLres	ADP	3.5025	0.00543924	0.419098	0.00150003	0.0687571	0.00686168	0.359781
MLres	sarcosine	1.03123	0.00642616	0.43093	0.00203284	0.0719286	0.0260144	0.392491
MLres	sorbitol	2.7715	0.0149868	0.523572	0.00217743	0.0719286	0.00578003	0.359781
MLres	adenosine	3.36557	0.0117891	0.523572	0.0035911	0.0863919	0.0178763	0.38618
MLres	histamine	0.613446	0.014134	0.523572	0.00462342	0.0994472	0.0198047	0.38618
MLres	tyrosine	0.550833	0.128435	0.702388	0.00628227	0.103064	0.036176	0.416572
MLres	creatine	0.949711	0.0131137	0.523572	0.00716087	0.103064	0.0324885	0.392783
MLres	phenylalanine	0.760926	0.0845139	0.657121	0.00839641	0.105497	0.0230353	0.38618
MLres	hippurate	0.870375	0.0189237	0.537242	0.00841579	0.105497	0.0355643	0.413707
MLres	X3.phosphoglycerate	-5.33712	0.000450865	0.256235	0.000179217	0.0451418	0.00151298	0.335013
MLres	alpha.glycerophosphate	-1.92845	0.00158749	0.355747	0.000466688	0.052146	0.00544255	0.359781
MLres	C36.4.PC.B	-0.138152	0.228216	0.759742	0.00173774	0.0691454	0.00690176	0.359781
MLres	C20.4.LPE	-1.37887	0.0124059	0.523572	0.00208596	0.0719286	0.00805992	0.370225
MLres	X2.deoxycytidine	-2.47655	0.00284901	0.355747	0.002172	0.0719286	0.00891929	0.370225
MLres	malondialdehyde	-1.86254	0.012107	0.523572	0.0057161	0.100347	0.0192654	0.38618

## Sheet: E. FTMres
Trait	Metabolite	coef.all	p.value.all	q.value.all	p.value.robust	q.value.robust	p.value.max	q.value.max
FTMres	adenosine	1.54504	0.000674301	0.256235	0.00019799	0.0451418	0.00122086	0.335013
FTMres	sorbitol	1.01474	0.021878	0.541288	0.00029107	0.052146	0.00216949	0.335013
FTMres	C34.2.DAG	0.153829	0.312903	0.816238	0.000784302	0.052146	0.0032838	0.335013
FTMres	C34.3.PC	0.388552	0.0590875	0.6165	0.00239409	0.0719286	0.0192235	0.38618
FTMres	GDP	1.11977	0.0459584	0.58214	0.00291374	0.0756085	0.0147026	0.38618
FTMres	arginine	0.130255	0.371886	0.84117	0.00326477	0.0827075	0.0142542	0.38618
FTMres	ADP	1.17085	0.021822	0.541288	0.00363755	0.0863919	0.016396	0.38618
FTMres	glutamate	0.195854	0.205176	0.7363	0.00777501	0.103064	0.027772	0.392491
FTMres	lysine	0.251924	0.0374134	0.576368	0.00835435	0.105497	0.0479996	0.426085
FTMres	histamine	0.218336	0.0259917	0.551621	0.00907382	0.107752	0.0314243	0.392783
FTMres	X2.deoxycytidine	-0.821851	0.010284	0.523572	0.000386043	0.052146	0.0039887	0.349778
FTMres	C16.0.LPC	-0.04665	0.774711	0.962187	0.000552912	0.052146	0.0031081	0.335013
FTMres	C20.4.LPE	-0.213001	0.371264	0.84117	0.00102124	0.0563803	0.00284545	0.335013
FTMres	alpha.glycerophosphate	-0.560488	0.015156	0.523572	0.00131199	0.0650292	0.00545373	0.359781
FTMres	C36.4.PC.A	-0.0883121	0.622636	0.925563	0.00239136	0.0719286	0.0142596	0.38618
FTMres	C16.0.LPE	0.0414146	0.797612	0.964763	0.0026039	0.0742112	0.0138093	0.38618
FTMres	C22.6.LPE	-0.022418	0.923022	0.990651	0.00523255	0.100347	0.0180977	0.38618
FTMres	X3.phosphoglycerate	-1.37253	0.0519776	0.586536	0.00551223	0.100347	0.0248921	0.392491
FTMres	C18.0.LPC	-0.177174	0.235264	0.759742	0.006761	0.103064	0.0199113	0.38618

## Sheet: F. Summary
Metabolite	AW	ML	FTM	MLres	FTMres
adenosine	0.101143	0.00399259	0.000831434	0.0035911	0.00019799
sorbitol	0.0267146	0.00589131	0.0024783	0.00217743	0.00029107
GDP	0.467048	0.00474164	0.0147717	0.000435345	0.00291374
lysine	0.000197856	0.00150783	0.00103858	0.0620217	0.00835435
ADP	0.0617169	0.00171662	0.00807491	0.00150003	0.00363755
arginine	0.0159001	0.00360287	0.00215102	0.0146653	0.00326477
histamine	0.034837	0.00226265	0.00440921	0.00462342	0.00907382
leucine	0.0137854	0.00740442	0.00573462	0.0473302	0.0145957
glutamate	0.0289232	0.00574349	0.0321597	0.010353	0.00777501
tryptophan	0.137091	0.00847553	0.00751363	0.0190169	0.0181014
C18:0 SM	-0.00595533	-0.00982001	-0.00891	-0.291599	-0.034015
C18:0 LPC	-0.0591284	-0.0311716	-0.00760407	-0.0623784	-0.006761
C22:6 LPE	-0.0623342	-0.0236047	-0.00537493	-0.0685632	-0.00523255
C18:1 LPC	-0.00485109	-0.00494002	-0.00239762	-0.0638868	-0.0852464
C36:4 PC-A	-0.389069	-0.00727384	-0.00281722	-0.0172802	-0.00239136
C36:4 PC-B	-0.034196	-0.00291822	-0.00858657	-0.00173774	-0.0160966
cytidine	-0.000189239	-0.00157187	-0.00175896	-0.107623	-0.170485
malondialdehyde	-0.00993213	-0.0008691	-0.00776173	-0.0057161	-0.0210925
C20:4 LPE	-0.0156399	-0.000706631	-0.000849819	-0.00208596	-0.00102124
alpha-glycerophosphate	-0.525003	-0.0919288	-0.00694871	-0.000466688	-0.00131199
2-deoxycytidine	-0.00675075	-0.000784055	-0.000659162	-0.002172	-0.000386043
3-phosphoglycerate	-0.786653	-0.00888282	-0.0368132	-0.000179217	-0.00551223
C16:0 LPC	-0.0053467	-0.000612204	-0.000133821	-0.0103626	-0.000552912

## Sheet: G. Positive Enrichment
Direction	Pathway	Database	Pathway Size	Observed Number	Expected Number	Odds Ratio	P Value	Adj Pvalue	Bootstrap P Value
Positive	Protein digestion and absorption	KEGG	21	6	1.02212	16	0.000107009	0.01252	0
Positive	Neuroactive ligand-receptor interaction	KEGG	10	4	0.486726	19.9048	0.000561146	0.0241059	0.001
Positive	Aminoacyl-tRNA biosynthesis	KEGG	19	5	0.924779	11.9643	0.000824134	0.0241059	0.0012
Positive	Common amino acids	KEGG	19	5	0.924779	11.9643	0.000824134	0.0241059	0.0012
Positive	Component_of_Fructose_and_mannose_metabolism	HMDB	7	3	0.340708	19.7812	0.00272684	0.0638081	0.0014
Positive	Component_of_Aminoacyl-tRNA_biosynthesis	HMDB	16	4	0.778761	9.66667	0.0041574	0.0810694	0.0044
Positive	ABC transporters	KEGG	28	5	1.36283	6.95652	0.00559857	0.0861933	0.0046
Positive	Essential_amino_acids	HMDB	9	3	0.438053	13.0625	0.00619438	0.0861933	0.0066
Positive	Component_of_Arginine_and_proline_metabolism	HMDB	18	4	0.876106	8.20408	0.00663025	0.0861933	0.0068
Positive	Amino Acids and Analogues	HMDB	44	6	2.14159	5.58947	0.00845534	0.0989275	0.009
Positive	Component_of_Glycine__serine_and_threonine_metabolism	HMDB	21	4	1.02212	6.65546	0.0119739	0.127359	0.0118
Positive	Synaptic vesicle cycle	KEGG	5	2	0.243363	15.7037	0.0199403	0.179463	0.0214
Positive	Component_of_Folate_biosynthesis	HMDB	5	2	0.243363	15.7037	0.0199403	0.179463	0.0194
Positive	Component_of_Alanine_and_aspartate_metabolism	HMDB	14	3	0.681416	6.95455	0.0233776	0.19537	0.0248
Positive	Histidine metabolism	KEGG	6	2	0.292035	11.7222	0.0291097	0.200343	0.0328
Positive	Component_of_Aminosugars_metabolism	HMDB	6	2	0.292035	11.7222	0.0291097	0.200343	0.0282
Positive	Component_of_Pantothenate_and_CoA_biosynthesis	HMDB	6	2	0.292035	11.7222	0.0291097	0.200343	0.025
Positive	Arginine and proline metabolism	KEGG	16	3	0.778761	5.82692	0.0340211	0.221137	0.034
Positive	Component_of_Selenoamino_acid_metabolism	HMDB	7	2	0.340708	9.33333	0.0396629	0.24424	0.0424

## Sheet: H. Negative Enrichment
Direction	Pathway	Database	Pathway Size	Observed Number	Expected Number	Odds Ratio	P Value	Adj Pvalue	Bootstrap P Value
Negative	Glycerophospholipids (LPC, PC, LPE, PE, PI, PS)	HMDB	30	5	1.46018	6.33333	0.00772636	0.777673	0.0078
Negative	Glycerophosphoethanolamines (LPE & PE)	HMDB	5	2	0.243363	15.7037	0.0199403	0.777673	0.0196
Negative	Monoacyl Glycerophosphoethanolamines (LPE)	HMDB	5	2	0.243363	15.7037	0.0199403	0.777673	0.0196
Negative	Nucleosides (Purine & Pyrimidine)	HMDB	7	2	0.340708	9.33333	0.0396629	1	0.038

## Sheet: I. Relaxed cut-off
Metabolite	AW	ML	FTM	MLres	FTMres
adenosine	0.101143	0.00399259	0.000831434	0.0035911	0.00019799
sorbitol	0.0267146	0.00589131	0.0024783	0.00217743	0.00029107
GDP	0.467048	0.00474164	0.0147717	0.000435345	0.00291374
C34:2 DAG	-0.0517147	0.170479	0.020841	0.0481355	0.000784302
lysine	0.000197856	0.00150783	0.00103858	0.0620217	0.00835435
pyroglutamic acid	0.0190546	0.0011717	0.0164045	0.0124511	0.312244
ADP	0.0617169	0.00171662	0.00807491	0.00150003	0.00363755
sarcosine	0.073826	0.0136477	0.0970055	0.00203284	0.09499
arginine	0.0159001	0.00360287	0.00215102	0.0146653	0.00326477
histamine	0.034837	0.00226265	0.00440921	0.00462342	0.00907382
C34:3 PC	-0.181928	0.169529	0.0294847	0.040804	0.00239409
proline	0.00960544	0.00535176	0.0182473	0.0137971	0.0421599
leucine	0.0137854	0.00740442	0.00573462	0.0473302	0.0145957
glutamate	0.0289232	0.00574349	0.0321597	0.010353	0.00777501
kynurenine	0.0283144	0.0805396	0.00586432	0.245213	0.0338545
tyrosine	0.0335466	0.0182101	0.0415468	0.00628227	0.121332
creatine	0.0611001	0.0104654	0.101446	0.00716087	0.122596
methionine	0.0101111	0.00730429	0.0217633	0.0151269	0.0509705
cotinine	0.102863	0.00860631	0.0470692	0.00741749	0.0364019
CDP	0.0650738	0.0074499	0.0270058	0.013989	0.023167
tryptophan	0.137091	0.00847553	0.00751363	0.0190169	0.0181014
phenylalanine	0.0877257	0.0103492	0.0183157	0.00839641	0.016904
hippurate	0.161873	0.0176474	0.0709843	0.00841579	0.0851759
C32:2 PC	-0.287863	0.248321	0.0281745	0.177693	0.0099894
UDP	0.254584	0.0461123	0.102049	0.0118565	0.0594962
N-monomethylarginine	0.0194598	0.0388848	0.0180264	0.0193834	0.0126239
asymmetric dimethylarginine / symmetric dimethylarginine	0.0614536	0.0168493	0.0465789	0.0127432	0.0406524
oxalate	0.0187082	0.0133866	0.019637	0.0274376	0.0416004
acetylcholine	0.00675311	0.013461	0.0486489	0.192213	0.198699
histidine	0.1282	0.0460108	0.0487503	0.0159731	0.0244818
lactate	0.0171944	0.0164815	0.0173005	0.111159	0.0568719
2-hydroxyglutarate	0.258414	0.10594	0.055951	0.0175606	0.0240915
trimethylamine-N-oxide	0.183717	0.0306897	0.0253056	0.0234205	0.0178239
allantoin	0.139951	0.0494576	0.0830561	0.0181061	0.0650296
lactose	0.0437014	0.0201694	0.0243518	0.089531	0.100946
C34:2 PC	-0.134984	0.217762	0.0399289	0.236218	0.020518
valine	0.0309043	0.0232107	0.03443	0.0676002	0.0497154
C52:6 TAG	0.504167	-0.194493	-0.118592	-0.0480507	-0.0437582
phosphoethanolamine	-0.175172	-0.0497037	-0.0424558	-0.0567858	-0.0522828
C18:1 LPE	-0.00706402	-0.0349985	-0.0429818	-0.0741523	-0.062371
C22:6 LPC	-0.0231553	-0.037759	-0.0331567	-0.222648	-0.0913119
cytosine	-0.000778532	-0.0354342	-0.029983	-0.307043	-0.282119
guanine	-0.0098662	-0.0398384	-0.0216035	0.377816	0.0922677
cystathionine	-0.0447222	-0.0376895	-0.0202805	-0.130361	-0.040717
glycocholate	-0.0130824	-0.0175308	-0.0376518	-0.110197	-0.126484
C5 carnitine	-0.16455	-0.0210702	-0.0245646	-0.0175096	-0.0207404
C20:4 LPC	-0.00945759	-0.0159483	-0.0268812	-0.15104	-0.0623521
phosphoenolpyruvate	0.276786	-0.110165	0.425806	-0.0152621	-0.0308381
3-methyladipate/pimelate	-0.197201	-0.0512344	-0.0280487	-0.0261115	-0.0140355
C16 carnitine	-0.0845407	-0.0239941	-0.0506117	-0.013166	-0.0443223
C18:2 LPC	-0.0486076	-0.0404052	-0.0161525	-0.0694777	-0.0127561
dCMP	-0.0149591	-0.0125571	-0.0343398	-0.0607169	-0.0846169
4-pyridoxate	-0.0313511	-0.0735718	-0.0123887	-0.13571	-0.0237175
uridine	-0.451883	-0.0107356	-0.191505	-0.0164757	-0.24528
putrescine	-0.142051	-0.125194	-0.0174879	-0.0675784	-0.0106426
kynurenine:tryptophan ratio	-0.0361316	-0.00962181	0.0217547	-0.0627677	0.0606713
C18:0 SM	-0.00595533	-0.00982001	-0.00891	-0.291599	-0.034015
C18:0 LPC	-0.0591284	-0.0311716	-0.00760407	-0.0623784	-0.006761
C22:6 LPE	-0.0623342	-0.0236047	-0.00537493	-0.0685632	-0.00523255
2-aminoadipate	-0.070952	-0.0443377	-0.00372267	-0.374993	-0.0136601
C16:0 LPE	-0.0444989	-0.0185917	-0.0252682	-0.19741	-0.0026039
C18:1 LPC	-0.00485109	-0.00494002	-0.00239762	-0.0638868	-0.0852464
C36:4 PC-A	-0.389069	-0.00727384	-0.00281722	-0.0172802	-0.00239136
C36:4 PC-B	-0.034196	-0.00291822	-0.00858657	-0.00173774	-0.0160966
cytidine	-0.000189239	-0.00157187	-0.00175896	-0.107623	-0.170485
malondialdehyde	-0.00993213	-0.0008691	-0.00776173	-0.0057161	-0.0210925
C20:4 LPE	-0.0156399	-0.000706631	-0.000849819	-0.00208596	-0.00102124
alpha-glycerophosphate	-0.525003	-0.0919288	-0.00694871	-0.000466688	-0.00131199
2-deoxycytidine	-0.00675075	-0.000784055	-0.000659162	-0.002172	-0.000386043
3-phosphoglycerate	-0.786653	-0.00888282	-0.0368132	-0.000179217	-0.00551223
C16:0 LPC	-0.0053467	-0.000612204	-0.000133821	-0.0103626	-0.000552912
